# Supplementary material for: Protocol for validating an algorithm to identify neurocognitive disorders in Canadian Longitudinal Study on Aging participants: an observational study
Source: PubMed Central journal article supplement — BMJ Open. 2023 Nov 1;13(11):e073027. doi: 10.1136/bmjopen-2023-073027 (PMC10626860; doi:10.1136/bmjopen-2023-073027), 2023-11-01
Supplement: bmjopen-2023-073027.draft_revisions.pdf [file bmjopen-2023-073027.draft_revisions.pdf]

# BMJ Open

BMJ Open is committed to open peer review. As part of this commitment we make the peer review history of every article we publish publicly available.

When an article is published we post the peer reviewers' comments and the authors' responses online. We also post the versions of the paper that were used during peer review. These are the versions that the peer review comments apply to.

The versions of the paper that follow are the versions that were submitted during the peer review process. They are not the versions of record or the final published versions. They should not be cited or distributed as the published version of this manuscript.

BMJ Open is an open access journal and the full, final, typeset and author-corrected version of record of the manuscript is available on our site with no access controls, subscription charges or pay-per-view fees (<http://bmjopen.bmj.com>).

If you have any questions on BMJ Open's open peer review process please email [info.bmjopen@bmj.com](mailto:info.bmjopen@bmj.com)

# BMJ Open

## Protocol for validating an algorithm to identify neurocognitive disorders in Canadian Longitudinal Study on Aging participants; an observational study

|                               |                                                                                                                                                                                                                                                                                                                                                                                                                                                                                                                                                                                                                                                                                                                                                                                                                                                                                                                                                                                                                                                                                                                                                                                                                                                                                                                                                                                                                                                                                       |
|-------------------------------|---------------------------------------------------------------------------------------------------------------------------------------------------------------------------------------------------------------------------------------------------------------------------------------------------------------------------------------------------------------------------------------------------------------------------------------------------------------------------------------------------------------------------------------------------------------------------------------------------------------------------------------------------------------------------------------------------------------------------------------------------------------------------------------------------------------------------------------------------------------------------------------------------------------------------------------------------------------------------------------------------------------------------------------------------------------------------------------------------------------------------------------------------------------------------------------------------------------------------------------------------------------------------------------------------------------------------------------------------------------------------------------------------------------------------------------------------------------------------------------|
| Journal:                      | <i>BMJ Open</i>                                                                                                                                                                                                                                                                                                                                                                                                                                                                                                                                                                                                                                                                                                                                                                                                                                                                                                                                                                                                                                                                                                                                                                                                                                                                                                                                                                                                                                                                       |
| Manuscript ID                 | bmjopen-2023-073027                                                                                                                                                                                                                                                                                                                                                                                                                                                                                                                                                                                                                                                                                                                                                                                                                                                                                                                                                                                                                                                                                                                                                                                                                                                                                                                                                                                                                                                                   |
| Article Type:                 | Protocol                                                                                                                                                                                                                                                                                                                                                                                                                                                                                                                                                                                                                                                                                                                                                                                                                                                                                                                                                                                                                                                                                                                                                                                                                                                                                                                                                                                                                                                                              |
| Date Submitted by the Author: | 23-Feb-2023                                                                                                                                                                                                                                                                                                                                                                                                                                                                                                                                                                                                                                                                                                                                                                                                                                                                                                                                                                                                                                                                                                                                                                                                                                                                                                                                                                                                                                                                           |
| Complete List of Authors:     | <p>Mayhew, Alexandra; McMaster University<br/> Hogan, David; University of Calgary; University of Calgary, Department of Medicine<br/> Raina, Parminder; McMaster University<br/> Wolfson, Christina; McGill University, Department of Epidemiology, Biostatistics and Occupational Health Department of Medicine; Research Institute of the McGill University Health Centre, Department of Epidemiology, Biostatistics and Occupational Health Department of Medicine<br/> Costa, Andrew P ; McMaster University<br/> Jones, Aaron; McMaster University<br/> Kirkland, Susan ; Dalhousie University, Department of Community Health &amp; Epidemiology<br/> O'Connell, Megan; University of Saskatchewan, Department of Psychology<br/> Taler, Vanessa; University of Ottawa; Bruyère Research Institute<br/> Smith, Eric E; University of Calgary, Department of Clinical Neurosciences<br/> Liu-Ambrose, Teresa; The University of British Columbia, Department of Physical Therapy; Vancouver Coastal Health Research Institute<br/> Ma, Jinhui; McMaster University, Department of Health Research Methods, Evidence, and Impact<br/> Thompson, Mary; University of Waterloo, Department of Statistics and Actuarial Science<br/> Wu, Changbao; University of Waterloo, Department of Statistics and Actuarial Science<br/> Chertkow, Howard; University of Toronto, Department of Medicine (Neurology); Rotman Research Institute<br/> Griffith, Lauren; Hamilton; Hamilton</p> |
| Keywords:                     | Dementia, Aging, PUBLIC HEALTH, EPIDEMIOLOGY                                                                                                                                                                                                                                                                                                                                                                                                                                                                                                                                                                                                                                                                                                                                                                                                                                                                                                                                                                                                                                                                                                                                                                                                                                                                                                                                                                                                                                          |
|                               |                                                                                                                                                                                                                                                                                                                                                                                                                                                                                                                                                                                                                                                                                                                                                                                                                                                                                                                                                                                                                                                                                                                                                                                                                                                                                                                                                                                                                                                                                       |

SCHOLARONE™  
Manuscripts

1  
2  
3  
4  
5  
6  
7  
8  
9  
10  
11  
12  
13  
14  
15  
16  
17  
18  
19  
20  
21  
22  
23  
24  
25  
26  
27  
28  
29  
30  
31  
32  
33  
34  
35  
36  
37  
38  
39  
40  
41  
42  
43  
44  
45  
46  
47  
48  
49  
50  
51  
52  
53  
54  
55  
56  
57  
58  
59  
60

1  
2  
3  
4  
5  
6  
7  
8  
9  
10  
11 **Protocol for validating an algorithm to identify neurocognitive disorders in Canadian Longitudinal**  
12 **Study on Aging participants; an observational study**  
13  
14  
15

16 Alexandra J. Mayhew<sup>1,2,3</sup>, David B. Hogan<sup>4,5,6</sup>, Parminder Raina<sup>1,2,3</sup>, Christina Wolfson<sup>7</sup>, Andrew Costa<sup>1,8</sup>,  
17 Aaron Jones<sup>1,8</sup>, Susan Kirkland<sup>9</sup>, Megan E. O'Connell<sup>10</sup>, Vanessa Taler<sup>11,12</sup>, Eric E. Smith<sup>13</sup>, Teresa Liu-  
18 Ambrose<sup>14,15,16</sup>, Jinhui Ma<sup>1</sup>, Mary Thompson<sup>17</sup>, Changbao Wu<sup>17</sup>, Howard Chertkow<sup>18,19</sup>, Lauren E.  
19 Griffith<sup>1,2,3</sup> \* on behalf of the CLSA Memory Study Working Group  
20

21 \* Corresponding author  
22

- 23 1 Department of Health Research Methods, Evidence, and Impact, McMaster University, Hamilton,  
24 Ontario, Canada  
25 2 Labarge Centre for Mobility in Aging, Hamilton, Ontario, Canada  
26 3 McMaster Institute for Research on Aging, Hamilton, Ontario, Canada  
27 4 Brenda Strafford Centre on Aging, 'O'Brien Institute for Public Health, University of Calgary, Calgary,  
28 Alberta, Canada  
29 5 Department of Medicine, Cumming School of Medicine, University of Calgary, Calgary, Alberta,  
30 Canada  
31 6 Canadian Consortium on Neurodegeneration in Aging Investigator Member  
32 7 Department of Epidemiology, Biostatistics and Occupational Health, School of Population and Global  
33 Health & Department of Medicine, McGill University, Montreal, Canada & Research Institute of the  
34 McGill University Health Centre, McGill University, Montreal, Canada  
35 8 ICES, Toronto, Ontario, Canada  
36 9 Department of Community Health & Epidemiology and Division of Geriatric Medicine, Dalhousie  
37 University, Halifax, Canada  
38 10 Department of Psychology, University of Saskatchewan, Saskatoon, Saskatchewan, Canada.  
39 11 School of Psychology, University of Ottawa, Ottawa, Ontario, Canada  
40 12 Bruyère Research Institute, Ottawa, Ontario, Canada  
41 13 Department of Clinical Neurosciences and Hotchkiss Brain Institute, University of Calgary, Calgary,  
42 Alberta, Canada  
43 14 Department of Physical Therapy, University of British Columbia, Vancouver, British Columbia,  
44 Canada.  
45 15 Djavad Mowafaghian Centre for Brain Health, University of British Columbia, Vancouver, British  
46 Columbia, Canada  
47 16 Centre for Hip Health and Mobility, Vancouver Coastal Health Research Institute, Vancouver, British  
48 Columbia, Canada  
49 17 Department of Statistics and Actuarial Science, University of Waterloo, Waterloo, Ontario, Canada  
50 18 Department of Medicine (Neurology), University of Toronto, Toronto, Ontario, Canada  
51 19 Rotman Research Institute, Baycrest Health Sciences, Toronto, Ontario, Canada  
52  
53  
54  
55  
56  
57  
58  
59  
60

**Email addresses:**

Alexandra J. Mayhew: [mayhewaj@mcmaster.ca](mailto:mayhewaj@mcmaster.ca)  
David B. Hogan: [dhogan@ucalgary.ca](mailto:dhogan@ucalgary.ca)  
Parminder Raina: [praina@mcmaster.ca](mailto:praina@mcmaster.ca)  
Christina Wolfson: [christina.wolfson@mcgill.ca](mailto:christina.wolfson@mcgill.ca)  
Andrew Costa: [acosta@mcmaster.ca](mailto:acosta@mcmaster.ca)  
Aaron Jones: [jonesa13@mcmaster.ca](mailto:jonesa13@mcmaster.ca)  
Susan Kirkland: [susan.kirkland@dal.ca](mailto:susan.kirkland@dal.ca)  
Megan E. O'Connell: [megan.oconnell@usask.ca](mailto:megan.oconnell@usask.ca)  
Vanessa Taler: [vtaler@uottawa.ca](mailto:vtaler@uottawa.ca)  
Eric E. Smith: [eesmith@ucalgary.ca](mailto:eesmith@ucalgary.ca)  
Teresa Liu-Ambrose: [teresa.ambrose@ubc.ca](mailto:teresa.ambrose@ubc.ca)  
Jinhui Ma: [maj26@mcmaster.ca](mailto:maj26@mcmaster.ca)  
Mary Thompson: [methomps@uwaterloo.ca](mailto:methomps@uwaterloo.ca)  
Changbao Wu: [cbwu@uwaterloo.ca](mailto:cbwu@uwaterloo.ca)  
Howard Chertkow: [hchertkow@research.baycrest.org](mailto:hchertkow@research.baycrest.org)  
Lauren E. Griffith: [griffith@mcmaster.ca](mailto:griffith@mcmaster.ca)

**Word count:** 3935

**ABSTRACT**

**Introduction:** In population-based research, disease ascertainment algorithms can be as accurate as, and less costly than, performing supplementary clinical examinations on selected participants to confirm a diagnosis of a neurocognitive disorder (NCD), but they require cohort-specific validation. To optimize the use of the Canadian Longitudinal Study on Aging (CLSA) to understand the epidemiology and burden of NCDs, the CLSA Memory Study will validate an NCD ascertainment algorithm to identify CLSA participants with these disorders using routinely acquired study data.

**Methods and analysis:** Up to 600 CLSA participants with equal numbers of those likely to have no NCD, mild NCD, or major NCD based on prior self-reported physician-diagnosis of a memory problem or dementia, medication consumption (i.e., cholinesterase inhibitors, memantine) and/or self-reported function will be recruited during the follow-up 3 CLSA evaluations (started August 2021). Participants will undergo an assessment by a study clinician who will also review an informant interview and make a preliminary determination of the presence or absence of an NCD. The clinical assessment and available CLSA data will be reviewed by a Central Review Panel who will make a final categorization of participants as having 1) no NCD; 2) mild NCD; or, 3) major NCD (according to DSM-5 criteria). These will be used as our gold standard diagnosis to determine if the NCD ascertainment algorithm accurately identifies CLSA participants with an NCD. Weighted Kappa statistics will be the primary measure of agreement. Sensitivity, specificity, the C-statistic, and the phi coefficient will also be estimated.

**Ethics and dissemination:** Ethics approval has been received from the institutional research ethics boards for each CLSA Data Collection Site. The results of this work will be disseminated to public health professionals, researchers, health professionals, administrators and policy makers through journal publications, conference presentations, publicly available reports, and presentations to stakeholder groups.

**Keywords:** CLSA, neurocognitive disorders, dementia, algorithm, validation

## ARTICLE SUMMARY

- Validation of a neurocognitive disorder case ascertainment algorithm for the Canadian Longitudinal Study on Aging (CLSA) will allow use of this longitudinal and comprehensive database of this large population-based study to explore risk factors, early manifestations, etiology, and trajectory of these disorders.
- Two particular challenges being faced in ascertaining the presence of a neurocognitive disorder are the lack of an informant and the use of cognitive measures that were not selected to diagnose a neurocognitive disorder. Lessons learned in overcoming these obstacles will be of use for other longitudinal studies with similar limitations.
- The results of the blinded clinician assessments and the additional information collected from their identified informant will allow us to refine and improve the accuracy of our case ascertainment algorithm.
- If validated, the neurocognitive disorder case ascertainment algorithm developed for the CLSA is validated cannot be utilized by other population-based studies that differ in the data being collected on participants.

## INTRODUCTION

A key challenge in population-based studies in aging is to accurately identify individuals who have neurocognitive disorders (NCDs). A common approach is to utilize a two-stage evaluation based on participants' estimated risk of an NCD. High risk participants and a random sample of those at lower risk undergo a clinical assessment specifically designed to identify NCDs. This approach adds complexity and costs to the study while being burdensome for participants. Relying on self-reports is likely insensitive. The Canadian Study of Health and Aging (CSHA), which used a two-stage evaluation to ascertain the presence of dementia, found that nearly two thirds (64%) of participants identified with prevalent dementia in the study had never seen a physician for a memory problem.[1] This was particularly common among those with mild functional impairment. While administrative data can also be used to estimate the burden of physician diagnosed and documented NCDs, the proportion with undocumented mild and major NCD is significant. [2]

The estimated population-based burden of diagnosed and undiagnosed dementia in Canada is based on data collected two decades ago in the CSHA [1] that does not reflect updated criteria for the diagnosis of mild (mild cognitive impairment) and major (dementia) NCD as described in the fifth version of the Diagnostic and Statistical Manual of Mental Disorders [DSM]-5. [3] Moreover, the increased awareness of NCDs over time may have led to earlier and more comprehensive identification and diagnosis. [4] Previous analyses focused on major NCD, but mild NCD, which is viewed as a precursor to major NCD in many cases, has attracted increasing research interest. Approximately 50% of people with milder degrees of impaired cognition in later life progress to dementia within 5 years [5]. Mild NCD is believed by many to be more likely to respond to disease-modifying interventions, making those with this condition a prime target group for their use. [6–8]

Contemporary estimates of the burden of mild and major NCD including in individuals that have not received a diagnosis is important to the understanding of the epidemiology of these disorders, their risk,

1  
2  
3 and protective factors, associated health outcomes, informing health and social care planning, and  
4 possibly leading to improved, proactive care of those living with or at risk for these conditions.  
5

6 The accuracy of self-reported diagnoses for identifying chronic diseases is dependent on the condition,  
7 what is considered the gold standard diagnosis, as well as the population studied. [9–12] To improve the  
8 identification of individuals with chronic conditions in observational population-based studies,  
9 researchers often create disease ascertainment algorithms. These algorithms include multiple data  
10 items such as self-reported diagnosis, disease-specific questionnaires, performance measures, and  
11 medication data to classify participants into those with and without diseases. [13] Population-based  
12 studies have utilized algorithms to classify individuals as having an NCD or not. The Health and  
13 Retirement Study (HRS) found that their algorithms correctly identified 87-94% of participants on  
14 dementia status. [14] The Personality and Total Health Through Life Project found that their algorithm  
15 had very good performance for identifying major NCD (area under the curve (AUC) of 0.95) and good  
16 performance (AUC of 0.76) for identifying mild NCD. [15]  
17  
18

19  
20 Although the application of algorithms to population-based data has the potential to be cost-effective  
21 and meet the need for a standardized and comprehensive identification of cases, because of variability  
22 in the studied populations and the data collected on them cohort-specific validation is required. [16] To  
23 validate an NCD algorithm, an assessment conducted by a clinician with training to diagnose NCDs is  
24 typically used as the gold standard. Ideally this assessment should include a participant interview,  
25 cognitive testing, physical examination, and an interview with an informant who knows the participant  
26 well enough to answer questions about their cognition, function, and behaviour. Informant ratings have  
27 been found to reveal greater loss of everyday functional ability and cognitive competency than self-  
28 reports and are more strongly associated with objective measures of cognitive performance compared  
29 to how an individual rates their abilities. [17]  
30  
31

32 The Canadian Longitudinal Study on Aging (CLSA) is a large (51,338 participants aged 45–85 years at  
33 enrolment) national, longitudinal research platform that includes participants from all 10 Canadian  
34 provinces. [18] It is being used to address a wide variety of aging-related research challenges including  
35 NCD. Disease ascertainment algorithms are already being used in the CLSA for several conditions (e.g.,  
36 type II diabetes mellitus, parkinsonism, chronic obstructive airway disease, osteoarthritis, coronary  
37 artery disease). [13]  
38  
39

40 To better understand the epidemiology and burden of diagnosed and undiagnosed mild and major NCD  
41 in CLSA participants (and by extrapolation the Canadian population), the CLSA Memory Study will be  
42 conducted to validate a disease ascertainment algorithm for NCD.  
43  
44

## 45 **METHODS AND ANALYSIS**

### 46 **Study design and participant eligibility**

47  
48 The CLSA Memory Study will recruit participants from the CLSA. The CLSA is composed of two  
49 complementary cohorts that may be studied separately or together (**Figure 1**): (1) Tracking cohort of  
50 21,241 participants randomly selected from within all 10 provinces who are interviewed by telephone,  
51 and, (2) Comprehensive cohort of 30,097 participants randomly selected from within 25–50 km of 11  
52 data collection sites (DCSs) across the country who are first interviewed at home and then visit their  
53 local DCS for a more in-depth assessment that includes additional interviews, physical measures, and  
54  
55  
56  
57

1  
2  
3 blood and urine samples. Participants are evaluated every 3 years and will be followed for 20 years (until  
4 2033) unless they withdraw, are lost to follow-up, or die.  
5

6  
7 Consenting CLSA Memory Study participants will be asked to undergo a clinical assessment at a local  
8 DCS. For this reason, we will include participants from the Comprehensive cohort as well as Tracking  
9 Cohort participants who live within 25-50km of a DCS. CLSA participants unable to visit their local DCS,  
10 complete the clinical assessment for any reason (e.g., aphasia, hearing loss), or cannot identify an  
11 informant will be excluded from participation.  
12

### 13 **Patient and public involvement**

14  
15 Participants and the public were not involved in our research design.  
16

### 17 **Participant selection and recruitment**

#### 18 ***Participant selection***

19  
20 Prior to being contacted for the CLSA Memory Study, potential participants will be categorized on their  
21 presumed cognitive status according to DSM-5 criteria; 1) no NCD; 2) mild NCD; and, 3) major NCD. The  
22 categorization will be based on data collected during the CLSA baseline (from 2011-2015), follow-up 1  
23 (conducted from 2015-2018), and follow-up 2 visits (conducted from 2018-2021). This preliminary  
24 categorization for participant selection is not the algorithm this project aims to validate.  
25  
26

27  
28 Participants are **presumed to have a mild NCD** if they have a self-reported physician diagnosis of a  
29 memory problem, can both take medicine and manage money without help and have not lost their  
30 driver's license or have restrictions on their license other than wearing eyeglasses. Additionally,  
31 participants who demonstrated cognitive problems in scheduling or during CLSA DCS visits that were  
32 documented by staff will be presumed to have a mild NCD.  
33

34 Participants are **presumed to have a major NCD** if they meet one or more of the following criteria;  
35

- 36
- 37 1. Use of prescription medications for the treatment of a major NCD (specifically donepezil,  
38 galantamine, rivastigmine, memantine)
  - 39 2. Self-reported physician diagnosis of dementia or Alzheimer's disease
  - 40 3. Self-reported physician diagnosis of a memory problem **and** at least one of the following  
41 functional limitations;
    - 42 ○ Requires assistance taking medication
    - 43 ○ Requires assistance managing money
    - 44 ○ Among those who formerly drove, no longer having a driver's license or having a  
45 driver's license with restrictions other than eyeglasses
- 46

47 Participants that do not meet the criteria for presumed mild or major NCD will be **presumed not to have  
48 an NCD.**  
49

50  
51 Approximately equal numbers from each of the three categories will be recruited, though final  
52 recruitment goals will be based on NCD status as determined through the Memory Study (see Statistical  
53 Methods section). Participants presumed to have mild or major NCD will first be selected. For 1/3 of the  
54 participants presumed to have major NCD and for 2/3 of the participants presumed to have mild NCD, a  
55 person of the same age (using participants' age category as of June 1<sup>st</sup>, 2022 (54-63, 64-73, 74-83, 84+  
56 years) and sex presumed to have no cognitive impairment will be chosen at random.  
57



### ***Participant recruitment***

Participants will be recruited into the CLSA Memory Study during CLSA follow-up 3 (started August 2021). Tracking cohort participants and comprehensive cohort participants who have completed their CLSA follow-up 3 interview will be e-mailed/mailed the participant information package (**Supplementary Appendix 1**). Comprehensive cohort participants that have not yet completed their main CLSA follow-up 3 interview will be given the participant information package during their follow-up 3 in-home interview.

After the participant has received an information package, the local CLSA DCS will contact the participant by phone to determine their interest in the study. Interested participants will complete a short questionnaire to determine if they understand the purpose of the study and what participant entails. Potential participants who, as judged by the interviewer, do not understand the details of the study will be ineligible. There are no additional eligibility criteria for participants selected for this sub-study beyond the general requirements for participation in the CLSA. [18] Eligible participants will provide informed consent, identify and provide contact information for an informant and schedule their clinical assessment (**Supplementary Appendix 2**). If a participant is unable or unwilling to identify an informant, they will not be able to participate in the study.

### ***Informant recruitment***

Each participant will be asked to identify a family member or friend that knows them well enough to respond to questions about their cognitive health, ability to complete daily tasks, and behaviour. Potential informants will be provided with a copy of the family member or friend information package (**Supplementary Appendix 3**). The local DCS will contact the identified potential informant by phone prior to the participant's clinical assessment to discuss the study, obtain consent from the informant, and schedule a time to complete the informant interview via phone (**Supplementary Appendix 4**). If the identified informant does not wish to take part in the study, the participant will be contacted and asked to identify an alternative informant.

### ***Measurements***

The CLSA Memory Study includes a clinical assessment of the study participant and a phone interview with the informant which will take place between September 2022 and March 2024.

### ***Clinical Assessment***

The clinical assessments will be conducted by a study clinician (medical specialist or senior trainee in geriatric medicine, geriatric psychiatry, neurology, or psychiatry; internist with training and experience in cognitive assessment; neuropsychologist) who will undergo local and/or virtual training in the performance of the standardized assessment and completion of all required forms. The clinical assessment (**Supplementary Appendix 5**) requires approximately one hour with the participant. It consists of a standardized history and physical examination designed to categorize the participant as having no evidence of an NCD, mild NCD, or major NCD. The study clinician will not have access to CLSA data on the participant other than name, age, sex, gender identity, education, employment status, and occupation and will be blinded to the participant's presumed cognitive status. The clinical assessment has not been designed to determine the likely underlying cause of the NCD, risk of progression, or specific care needs of the participant. The components of the assessment are as follows:

1. Participant interview
  - a. Sociodemographic information (age, sex, gender identity, education, occupation, employment status)

- b. History of cognitive decline
  - c. Medical history including medical conditions, a review of medications focusing on those with cognitive effects, use of tobacco, cannabis and alcohol, and a family history of dementia
  - d. Basic activities of daily living measured using the Older Americans Resource and Services Program (OARS) scale [19]
  - e. Instrumental activities of daily living measured using the OARS scale [19] with additional questions regarding transportation (i.e., driving)
  - f. Behavioural symptoms including depression measured using the Patient Health Questionnaire-2 [20], anxiety, psychotic symptoms, and changes in personality.
2. Cognitive testing
    - a. The Montreal Cognitive Assessment (MoCA) [21] will be used as a general measure of cognition. The MoCA is a brief instrument that has been shown to be a valid screening test for mild (MCI) and major NCD (dementia) [22] with validated versions and normative data for both English and Quebec-French [23] populations. The MoCA-BLIND version will be used for participants with visual impairments that would prevent them from completing the MoCA. [24] An optional section of the MoCA called the Memory Impairment Score (MIS) will be used to assess uncued and cued (category and multiple-choice options) recall of the memory items. The use of the MoCA total and MoCA-MIS scores with all the other information being collected on participants will be used to help identify participants with mild and major NCD. [25]
  3. Physical examination
    - a. Alertness
    - b. Hearing
    - c. Focal/lateralizing neurological findings
    - d. Extrapyrarnidal signs
    - e. Balance and gait assessment including transfers, gait, and the Romberg test

### ***Informant Interview***

The informant interview will be conducted by CLSA DCS staff using a standardized protocol. All CLSA DCSs have highly trained data collection teams. The informant interview (**Supplementary Appendix 6**) includes several overlapping items to those directly asked of participant. Interview questions will focus on the participant's cognitive, functional, and mood/behavioural history. The components of the interview are as follows:

1. Cognitive changes measured using the eight-item informant interview to differentiate aging and dementia (AD8<sup>®</sup> Dementia Screening Interview) [26]. The AD8<sup>®</sup> asks about changes in memory, orientation, judgement, and function that might indicate a dementing illness.
2. Medical history including medical conditions, use of tobacco, cannabis and alcohol, and a family history of dementia
3. Basic activities of daily living measured using the OARS scale [19]
4. Instrumental activities of daily living measured using the OARS scale [19] with additional questions regarding transportation
4. Presence of current mood and psychiatric symptoms using the Mild Behavioural Impairment Checklist (MBI-C). [27]The MBI-C was designed to measure neuropsychiatric symptoms that precede or coincide with the diagnosis of mild cognitive impairment. The instrument measures the domains of 1) decreased motivation; 2) emotional dysregulation; 3) loss of impulse control; 4) social inappropriateness; and, 5) abnormal perception or thought content.

## Participant categorization based on clinical assessment and informant interview

### ***Study clinician***

Based on the clinical assessment and the informant interview, the study clinician will make a provisional clinical determination of: 1) no evidence of cognitive impairment; 2) mild NCD (MCI); or, 3) major NCD (dementia) based on DSM-5 criteria. [3]

Study physicians will not provide participants with their provisional diagnosis, as to make a clinical diagnosis of mild or major NCD with confidence would require a more in-depth evaluation including review of prior health records, laboratory and/or imaging investigations as well as possible follow-up visits that our study clinicians are unable to provide. The study clinician will verbally tell the participant if there is a potential concern regarding their memory (the term memory will be used to describe any cognitive concern when communicating with the participant) or if they do not have any concerns based on the assessment and informant interview just conducted. The study clinician will tailor the conversation based on the participant's level of understanding and their own degree of concern. Each participant will then be provided with a letter indicating if the clinician identified a potential problem with the participant's memory (**Supplementary Appendix 7**) or no evidence of a potential problem with the participant's memory (**Supplementary Appendix 8**), as well as the participant's total score on the MoCA and details about the CLSA Memory Study. Participants identified by the clinician as having potential concerns about their memory will be encouraged to speak with their family physician and share the information provided verbally and in writing. If the participant does not have a family physician, the study clinician will provide the participant with local resources that the participant may use for follow-up care.

### ***Central Review Panel***

A Central Review Panel including medical specialists (e.g., geriatric medicine, geriatric psychiatry, neurology, or psychiatry with training and experience in cognitive assessment) and neuropsychologists will review the clinical assessment, informant interview, and available CLSA data such as performance on the neurocognitive battery conducted at baseline through to the follow-up 2 CLSA assessment (which the examining physician will not have seen). Based on the review of these data, the Panel will make a final study categorization. This will be compared to the one made by the study clinician, and, if different, an explanation for reaching a differing determination will be documented and provided to the examining clinician. The Central Review Panel will help ensure that the study is implemented in a standardized manner across all sites by the participating clinicians. Any concerns will be brought to the attention of the involved clinician and the CLSA Memory Study investigators.

### ***Pilot study and adaptation of recruitment criteria***

Prior to the full implementation of the CLSA Memory Study, pilot testing will be conducted on a sample of 10 participants at two DCS sites (Hamilton and Calgary) to 1) identify any issues needing correction and 2) develop implementation advice for all DCS sites. These participants will be included in the final sample with their data retained as study data.

CLSA Memory Study investigators and staff will monitor the number of recruited participants by presumed NCD status, study clinician NCD determinations, and Central Review Panel categorizations at a group level. This monitoring will allow the detection of unbalanced recruitment and the opportunity to adapt the recruitment strategy during the study to ensure we end up with approximately equal number of participants in each NCD diagnostic category based on the Central Review Panel categorizations. For

example, if the number of participants determined by the study clinician and/or Central Review Panel to have major NCD is lower than expected, we will start to oversample from the group of participants presumed to have a major NCD to compensate.

### CLSA NCD ascertainment algorithm

#### *Development of the CLSA NCD ascertainment algorithm*

This was informed by a systematic review of methods used to identify cases of mild and major NCD in population-based studies ([https://www.crd.york.ac.uk/prospero/display\\_record.php?RecordID=78874](https://www.crd.york.ac.uk/prospero/display_record.php?RecordID=78874)). Identified potential items for inclusion were categorized based on DSM-5 criteria and then mapped onto available CLSA data (**Supplementary Appendix 9**). Conditional use (e.g., only include functional data provided by participants who achieve a certain cognitive threshold on the MoCA) and alternative weighting of select items that might improve on the accuracy of the algorithm will be explored in the Study.

#### *Participant categorization based on CLSA ascertainment algorithm*

The initial validation of the CLSA ascertainment algorithm will include CLSA data from baseline, follow-up 1, and follow-up 2 assessments. The follow-up 2 interview data were collected three or more years before the Memory Study was initiated and may not accurately reflect the current cognitive status for all participants (e.g., for those with new onset neurocognitive disorders). Therefore, final validation of the algorithm will occur when the follow-up 3 assessment data, which were collected at the time of the CLSA Memory Study, are available to the Central Review Panel in 2024.

#### **Statistical analyses and sample size determination**

Kappa using Cicchetti-Allison weights and the percent of agreement between the reference standard and the CLSA NCD algorithm will be calculated to assess the reliability of the CLSA algorithm. Sensitivity, specificity, and C statistics for the CLSA NCD algorithm for each outcome category (major NCD, mild NCD, or no evidence of cognitive impairment) will be estimated using logistic regression. [28] Analyses will be completed overall and stratified by sex and age-group (age 45-65 years old and 65+) using SAS. We have calculated the minimum sample size required based on different combinations of Kappa values and precision (distance between the lower and upper 95% confidence limits) (**Table 1**) using the 'kappaSize' Package in R with 3 outcome categories. This package assumed unweighted kappa to provide a conservative sample size estimate. Our final sample size will range between approximately 200 participants assuming an expected Kappa of 0.7 and precision of 0.2, and 600 participants assuming an expected Kappa of 0.7 and a precision of 0.1. Our aspiration is to recruit as close to 600 participants as possible, but this will be dependent on sufficient funding. We currently have funding confirmed for 320.

**Table 1 – Minimum sample size for 95% confidence interval width (0.05, 0.1, 0.15, and 0.2) by Kappa**

| <b>Kappa</b> | <b>Precision (the distance between the lower and upper 95% confidence limits)</b> | <b>Minimum required total sample size</b> |
|--------------|-----------------------------------------------------------------------------------|-------------------------------------------|
| 0.7          | 0.05                                                                              | 2348                                      |
|              | 0.10                                                                              | 619                                       |
|              | 0.15                                                                              | 289                                       |
|              | 0.20                                                                              | 170                                       |
| 0.8          | 0.05                                                                              | 1764                                      |

|  |      |     |
|--|------|-----|
|  | 0.10 | 481 |
|  | 0.15 | 231 |
|  | 0.20 | 139 |

## ETHICS AND DISSEMINATION

Ethics approval for this project was provided by the Research Ethics Board responsible for each participating site (**Supplementary Appendix 10**).

Our knowledge translation plan includes sharing the results of the project with researchers and health professionals through journal publications and conference presentations. The CLSA will host a webinar on the Memory Study that will be open to researchers, health professionals, public health workers, as well as participants with an interest in NCD research. We will work with other partners to present our results to key groups. The CLSA will develop and disseminate a report that describes the results of the project and implications for health system stakeholders likely to use the results (e.g., health professionals, administrators, policymakers). The report and presentations will be tailored to specific stakeholder groups including those responsible for provincial and national dementia strategies (e.g., Ministerial Advisory Board on Dementia), health professional organizations (e.g., Canadian Geriatrics Society), and health charities (e.g., Alzheimer's Society of Canada). The report will also be available on the CLSA website. The CLSA website and social media platforms will be used to disseminate a summary of the project to participants. It is anticipated that the targets of tailored knowledge translation activities will use the results in various ways including: additional research on risk and protective factors for NCDs; development and implementation of best practices for early intervention and treatment for people with mild and major NCD; and, improving public health surveillance systems that develop population estimates for dementia in Canada that can be used to inform current and future government investment in prevention and care.

## DISCUSSION

There are some limitations with the use of CLSA data for developing an NCD ascertainment algorithm. First, CLSA interview data do not include an informant interview on most participants. In clinical settings, informant reports are an important component of the diagnosis of NCDs, as individuals with an NCD may be unaware of their own functional status and behavioural changes. [29] Although the CLSA asks participants over the age of 70 years to identify a proxy, proxy interviews have only been conducted on a small number of participants and under specific conditions. Informant data therefore cannot be used to inform the algorithm. Another limitation is that the CLSA neurocognitive battery was not developed to diagnose NCDs. [30] Rather, the battery items were selected to be applicable to a wide age range without ceiling or floor effects in order to capture decline over time. The neurocognitive battery items reflect the domains of executive function and memory, but not complex attention, language, perceptual-motor, or social cognition.

There are also several strengths of the CLSA dataset for developing an NCD ascertainment algorithm. The breadth of routinely collected CLSA data (e.g., balance and gait performance measures, trajectory of changes in cognitive test performance) and the high percentage of participants (~88%) that have provided permission to the CLSA data to be linked to health care administrative databases provides an opportunity to explore the creation of an expanded and superior NCD ascertainment algorithm. Having

1  
2  
3 a relatively large (up to 600) group of participants who have gone through a gold standard assessment  
4 for NCDs will make this effort possible.  
5

## 6 **CONCLUSION**

7  
8 If the results of the CLSA Memory Study suggest that the proposed NCD ascertainment algorithm is a  
9 valid method of identifying NCD cases, it will be applied to all CLSA participants. This will enhance the  
10 CLSA dataset for NCD research and provide important insights regarding the risk and protective factors  
11 of NCD and associated health outcomes. Linkage to healthcare administrative databases will allow the  
12 CLSA to estimate the burden of mild and major NCD in Canada. Together, these sources of data will help  
13 inform health and social care planning for individuals with NCD.  
14  
15

16  
17 **Authorship:** The following are members of the CLSA Memory Study Working Group: Andrew Costa,  
18 Benoit Cossette, Lauren E. Griffith, David B. Hogan, Aaron Jones, Susan Kirkland, Teresa Liu-Ambrose,  
19 Jinhui Ma, Alexandra J. Mayhew, Jacqueline McMillan, Verena Menec, Gerry Mugford, Megan E.  
20 O'Connell, Theone Paterson, Christopher Patterson, Parminder Raina, Eric E. Smith, Vanessa Taler, Mary  
21 Thompson, Andrew Wister, Christina Wolfson, & Changbao Wu.  
22

23 **Author Contributions:** LEG, PR, AC, and DH led the conceptualization of the study methodology. AJM  
24 made contributions to the design of the study methods and wrote the first draft of the manuscript. CW,  
25 AJ, SK, MO, VT, EES, TL-A, JM, MT, CW, HC made contributions to the design of the study methods and  
26 supported the manuscript. All authors critically revised the manuscript and approved the final version.  
27

28 **Acknowledgements:** This research was made possible using the data/biospecimens collected by the  
29 Canadian Longitudinal Study on Aging (CLSA). Funding for the Canadian Longitudinal Study on Aging  
30 (CLSA) is provided by the Government of Canada through the Canadian Institutes of Health Research  
31 (CIHR) under grant reference: LSA 9447 and the Canada Foundation for Innovation, as well as the  
32 following provinces, Newfoundland, Nova Scotia, Quebec, Ontario, Manitoba, Alberta, and British  
33 Columbia. The CLSA provided data to the authors to conduct this study through an internal methods  
34 project application. The CLSA is led by Drs. Parminder Raina, Christina Wolfson, and Susan Kirkland. The  
35 opinions expressed in this manuscript are the authors' own and do not reflect the views of the CLSA.  
36 This research was also made possible by CIHR Team Grant (New Directions in Dementia Research: Big  
37 Data) funding provided to the Canadian Consortium on Neurodegeneration in Aging (CCNA) for the  
38 *Broad and Deep Analyses in Neurodegeneration (BRAIN)* project. The Scientific Director of the CCNA is  
39 Dr. Howard Chertkow. The opinions expressed in this manuscript are the authors' own and do not  
40 reflect the views of the CCNA.  
41  
42

43 **Funding statement:** Funding for this project is provided by the Public Health Agency of Canada under  
44 project number 2021-HQ-000076 and the CIHR (funding reference number BDO 148341).  
45

46 **Competing interests:** No conflicts of interest to report.  
47  
48  
49  
50  
51  
52  
53  
54  
55  
56  
57

## REFERENCES

- 1 Sternberg SA, Wolfson C, Baumgarten M. Undetected dementia in community-dwelling older people: The Canadian study of health and aging. *J Am Geriatr Soc* 2000;**48**:1430–4. doi:10.1111/j.1532-5415.2000.tb02633.x
- 2 Lang L, Clifford A, Wei L, *et al.* Prevalence and determinants of undetected dementia in the community: A systematic literature review and a meta-analysis. *BMJ Open* 2017;**7**:1–8. doi:10.1136/bmjopen-2016-011146
- 3 American Psychiatric Association. *Diagnostic and Statistical Manual of Mental Disorders, Fifth Edition*. American Psychiatric Association Publishing 2013.
- 4 Tang W, Kannaley K, Friedman DB, *et al.* Concern about developing Alzheimer’s disease or dementia and intention to be screened: An analysis of national survey data. *Arch Gerontol Geriatr* 2017;**71**:43–9. doi:10.1016/j.archger.2017.02.013
- 5 Tuokko H, Frerichs RJ. Cognitive impairment with no dementia (CIND): Longitudinal studies, the findings, and the issues. *Clinical Neuropsychologist* 2000;**14**:504–25. doi:10.1076/clin.14.4.504.7200
- 6 U.S. Department of Health and Human Services Food and Drug Administration. Early Alzheimer’s Disease: Developing Drugs for Treatment -Guidance for Industry. 2018. <https://www.fda.gov/Drugs/GuidanceComplianceRegulatoryInformation/Guidances/default.htm>
- 7 van Dyck CH, Swanson CJ, Aisen P, *et al.* Lecanemab in Early Alzheimer’s Disease. *N Engl J Med* Published Online First: 29 November 2022. doi:10.1056/NEJMoa2212948
- 8 Getsios D, Blume S, Ishak KJ, *et al.* An economic evaluation of early assessment for Alzheimer’s disease in the United Kingdom. *Alzheimer’s and Dementia* 2012;**8**:22–30. doi:10.1016/j.jalz.2010.07.001
- 9 Stoye G, Zaranko B. IFS Working Paper W20/13 How accurate are self-reported diagnoses? Comparing self-reported health events in the English Longitudinal Study of Ageing with administrative hospital records How accurate are self-reported diagnoses? Comparing self-reported health events in the English Longitudinal Study of Ageing with administrative hospital records. 2020.
- 10 Smith B, Chu LK, Smith TC, *et al.* Challenges of self-reported medical conditions and electronic medical records among members of a large military cohort. *BMC Med Res Methodol* 2008;**8**:1–10. doi:10.1186/1471-2288-8-37
- 11 Okura Y, Urban LH, Mahoney DW, *et al.* Agreement between self-report questionnaires and medical record data was substantial for diabetes , hypertension , myocardial infarction and stroke but not for heart failure. 2004;**57**:1096–103. doi:10.1016/j.jclinepi.2004.04.005

- 1  
2  
3 12 Payette Y, de Moura C, Boileau C, *et al.* Is there an agreement between self-reported medical  
4 diagnosis in the CARTaGENE cohort and the Québec administrative health databases? *Int J Popul*  
5 *Data Sci* 2019;**5**.  
6  
7  
8 13 Oremus M, Postuma R, Griffith L, *et al.* Validating chronic disease ascertainment algorithms for  
9 use in the Canadian Longitudinal Study on Aging. *Canadian Journal on Aging* 2013;**32**:232–9.  
10 doi:10.1017/S0714980813000275  
11  
12 14 Gianattasio KZ, Wu Q, Glymour MM, *et al.* Comparison of Methods for Algorithmic Classification  
13 of Dementia Status in the Health and Retirement Study. *Epidemiology* 2019;**30**:291–302.  
14 doi:10.1097/EDE.0000000000000945  
15  
16 15 Eramudugolla R, Mortby ME, Sachdev P, *et al.* Evaluation of a research diagnostic algorithm for  
17 DSM-5 neurocognitive disorders in a population-based cohort of older adults. *Alzheimers Res*  
18 *Ther* 2017;**9**:1–12. doi:10.1186/s13195-017-0246-x  
19  
20 16 Wilkinson T, Ly A, Schnier C, *et al.* Identifying dementia cases with routinely collected health  
21 data: A systematic review. *Alzheimer's and Dementia* 2018;**14**:1038–51.  
22 doi:10.1016/j.jalz.2018.02.016  
23  
24 17 Rueda A, Lau K, Saito N, *et al.* Self-rated and informant-rated everyday function in comparison to  
25 objective markers of Alzheimer's disease. *Alzheimers Dement* 2016;**11**:1080–9.  
26 doi:10.1016/j.jalz.2014.09.002.Self-rated  
27  
28 18 Raina PS, Wolfson C, Kirkland SA, *et al.* Cohort profile: The Canadian Longitudinal Study on Aging  
29 (CLSA). *Canadian Journal on Aging* 2009;**28**:221–9. doi:10.1017/S0714980809990055  
30  
31 19 Fillenbaum G, Smyer M. The development, validity, and reliability of the OARS Multidimensional  
32 Functional Assessment Questionnaire. *J Gerontol* 1981;**36**:428–34.  
33  
34 20 Kroenke K, Spitzer RL, Williams JBW. The Patient Health Questionnaire-2 Validity of a Two-Item  
35 Depression Screener. *Med Care* 2003;**41**:1284–92.  
36  
37 21 Nasreddine ZS, Phillips NA, Bédirian V, *et al.* The Montreal Cognitive Assessment, MoCA: A brief  
38 screening tool for mild cognitive impairment. *J Am Geriatr Soc* 2005;**53**:695–9.  
39 doi:10.1111/j.1532-5415.2005.53221.x  
40  
41 22 Tsoi KKF, Chan JYC, Hirai HW, *et al.* Cognitive tests to detect dementia a systematic review and  
42 meta-analysis. *JAMA Intern Med* 2015;**175**:1450–8. doi:10.1001/jamainternmed.2015.2152  
43  
44 23 Larouche E, Tremblay MP, Potvin O, *et al.* Normative Data for the Montreal Cognitive Assessment  
45 in Middle-Aged and Elderly Quebec-French People. *Archives of Clinical Neuropsychology*  
46 2016;**31**:819–26. doi:10.1093/arclin/acw076  
47  
48  
49  
50  
51  
52  
53  
54  
55  
56  
57  
58  
59  
60



- 1  
2  
3 24 Wittich W, Phillips N, Nasreddine ZS, *et al.* Sensitivity and specificity of the Montreal cognitive  
4 assessment modified for individuals who are visually impaired. *J Vis Impair Blind* 2010;**104**:360–8.  
5 doi:10.1177/0145482x1010400606  
6  
7  
8 25 Julayanont P, Brousseau M, Chertkow H, *et al.* Montreal Cognitive Assessment Memory Index  
9 Score (MoCA-MIS) as a predictor of conversion from mild cognitive impairment to Alzheimer’s  
10 disease. *J Am Geriatr Soc* 2014;**62**:679–84. doi:10.1111/jgs.12742  
11  
12 26 Galvin JE, Roe CM, Powlishta KK, *et al.* The AD8: A brief informant interview to detect dementia.  
13 *Neurology* 2005;**65**:559–64. doi:10.1212/01.wnl.0000172958.95282.2a  
14  
15  
16 27 Ismail Z, Aguera-Ortiz L, Brodaty H, *et al.* The mild behavioral impairment checklist (MBI-C): A  
17 rating scale for neuropsychiatric symptoms in pre-dementia populations. *Journal of Alzheimer’s*  
18 *Disease* 2017;**56**:929–38. doi:10.3233/JAD-160979.The  
19  
20  
21 28 Cook R, Farewell V. Conditional inference for subject specific and marginal agreement. Two  
22 families of agreement measures. *Canadian Journal of Statistics* 1995;**23**:333–44.  
23  
24 29 Schinka JA. Use of informants to identify mild cognitive impairment in older adults. *Curr*  
25 *Psychiatry Rep* 2010;**12**:4–12. doi:10.1007/s11920-009-0079-9  
26  
27  
28 30 Tuokko H, Griffith LE, Simard M, *et al.* Cognitive measures in the Canadian Longitudinal Study on  
29 Aging. *Clin Neuropsychol* 2017;**40**:1–18. doi:10.1080/13854046.2016.1254279  
30  
31  
32  
33  
34  
35  
36  
37  
38  
39  
40  
41  
42  
43  
44  
45  
46  
47  
48  
49  
50  
51  
52  
53  
54  
55  
56  
57  
58  
59  
60

1  
2  
3 **Figure 1. CLSA Study Design:** The CLSA Memory Study will recruit Comprehensive Cohort and Tracking  
4 Cohort participants who are currently undergoing their follow-up three assessment (started August  
5 2021) for the CLSA.  
6  
7  
8  
9  
10  
11  
12  
13  
14  
15  
16  
17  
18  
19  
20  
21  
22  
23  
24  
25  
26  
27  
28  
29  
30  
31  
32  
33  
34  
35  
36  
37  
38  
39  
40  
41  
42  
43  
44  
45  
46  
47  
48  
49  
50  
51  
52  
53  
54  
55  
56  
57  
58  
59  
60

For peer review only

## Note from the Editors: Instructions for reviewers of study protocols

---

Since launching in 2011, BMJ Open has published study protocols for planned or ongoing research studies. If data collection is complete, we will not consider the manuscript.

Publishing study protocols enables researchers and funding bodies to stay up to date in their fields by providing exposure to research activity that may not otherwise be widely publicised. This can help prevent unnecessary duplication of work and will hopefully enable collaboration. Publishing protocols in full also makes available more information than is currently required by trial registries and increases transparency, making it easier for others (editors, reviewers and readers) to see and understand any deviations from the protocol that occur during the conduct of the study.

The scientific integrity and the credibility of the study data depend substantially on the study design and methodology, which is why the study protocol requires a thorough peer-review.

*BMJ Open* will consider for publication protocols for any study design, including observational studies and systematic reviews.

Some things to keep in mind when reviewing the study protocol:

- Protocol papers should report planned or ongoing studies. The dates of the study should be included in the manuscript.
- Unfortunately we are unable to customize the reviewer report form for study protocols. As such, some of the items (i.e., those pertaining to results) on the form should be scored as Not Applicable (N/A).
- While some baseline data can be presented, there should be no results or conclusions present in the study protocol.
- For studies that are ongoing, it is generally the case that very few changes can be made to the methodology. As such, requests for revisions are generally clarifications for the rationale or details relating to the methods. If there is a major flaw in the study that would prevent a sound interpretation of the data, we would expect the study protocol to be rejected.

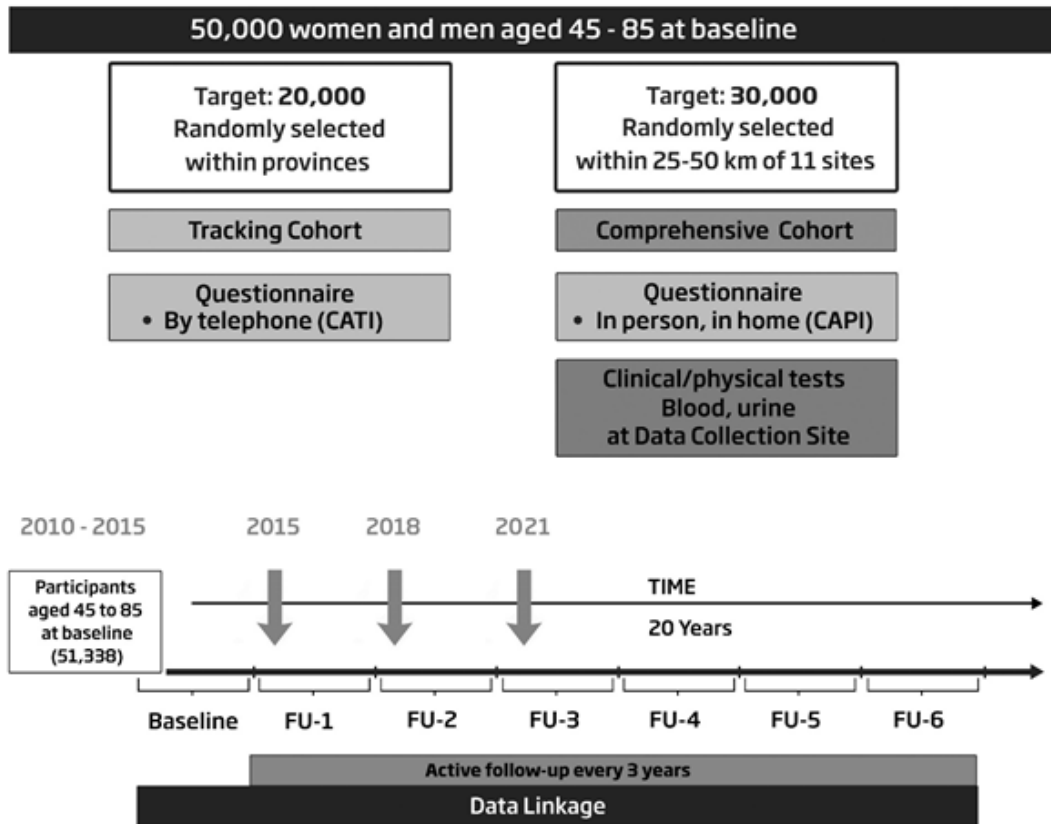

view only

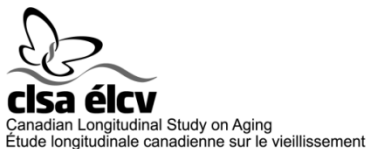

1  
2  
3  
4  
5  
6  
7  
8  
9  
10  
11  
12  
13  
14  
15  
16  
17  
18  
19  
20  
21  
22  
23  
24  
25  
26  
27  
28  
29  
30  
31  
32  
33  
34  
35  
36  
37  
38  
39  
40  
41  
42  
43  
44  
45  
46  
47  
48  
49  
50  
51  
52  
53  
54  
55  
56  
57  
58  
59  
60

**Supplementary Appendix 1 – Participant Information Package for Tracking and Comprehensive Cohort Participants**

**Participant Information Package Cover Letter for Tracking Cohort Participants..... 2**  
**Participant Information Package Cover Letter for Comprehensive Cohort Participants ..... 4**  
**Participant Study Information Package ..... 6**

peer review only

## Participant Information Package Cover Letter for Tracking Cohort Participants

Dear [Participant],

As a longstanding participant in the Canadian Longitudinal Study on Aging (CLSA), we are inviting you to participate in the CLSA Memory Study. Participants in the CLSA Memory Study will be asked to:

1. Undergo a medical assessment by a study physician at the CLSA Data Collection Site. The CLSA Data Collection Site is within 25 to 50km of your home. You will be given \$30 in cash or as a gift card in lieu of expenses such as parking or other travel related expenses. The assessment will include questions about your medical history and a brief cognitive test which includes answering questions and drawing on paper. The doctor will also complete a neurocognitive examination, which involves assessing your ability to see, observing you move, and listening to you speak.
2. Identify a family member or friend who knows you well to complete an interview by phone regarding your cognitive health, ability to complete daily tasks, and behaviour.

The CLSA Memory Study is being funded by the Public Health Agency of Canada (PHAC). The CLSA Memory Study is being led by Dr. Lauren Griffith, Dr. Andrew Costa, and Dr. Parminder Raina, all from McMaster University. Other researchers from universities across Canada are also involved.

[Attached to this email are/This package contains] two documents that will provide you with information to help you make an informed choice about if you would like to take part in this study.

1. **Participant Study Information Package** – This package includes information about the study for you to review.
2. **Family Member or Friend Study Information Package** – This package includes information for the family member or friend you ask to complete the telephone regarding your cognitive health, ability to complete daily tasks, and behaviour. If you see your family member or friend in person, you may choose to share this information package with them. Otherwise, we can arrange to send a physical or electronic copy to them.

Please read the **Participant Study Information Package** carefully. We will call you in the next few weeks and you will have an opportunity to ask any questions you may have. You may also find it helpful to discuss this study with your friends and family.

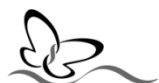

**clsa élcv**

Canadian Longitudinal Study on Aging  
Étude longitudinale canadienne sur le vieillissement

If you wish to contact us directly, please feel free to:

- Email at **info@clsa-elcv.ca**
- Call our toll-free line at **1-866-999-8303**

Thank you,

For peer review only

## Participant Information Package Cover Letter for Comprehensive Cohort Participants

Dear [Participant],

As a longstanding participant in the Canadian Longitudinal Study on Aging (CLSA), we are inviting you to participate in the CLSA Memory Study. Participants in this study will be asked to:

1. Undergo a medical assessment by a study physician at the CLSA Data Collection Site. The assessment will include questions about your medical history and a brief cognitive test which includes answering questions and drawing on paper. The doctor will also complete a neurocognitive examination, which involves assessing your ability to see, observing you move, and listening to you speak.
2. Identify a family member or friend who knows you well to complete an interview by phone regarding your cognitive health, ability to complete daily tasks, and behaviour.

The CLSA Memory Study is being funded by the Public Health Agency of Canada (PHAC). The CLSA Memory Study is being led by Dr. Lauren Griffith, Dr. Andrew Costa, and Dr. Parminder Raina, all from McMaster University. Other researchers from universities across Canada are also involved.

[Attached to this email are/This package contains] two documents that will provide you with information to help you make an informed choice about if you would like to take part in this study.

1. **Participant Study Information Package** – This package includes information about the study for you to review.
2. **Family Member or Friend Study Information Package** – This package includes information for the family member or friend you ask to complete the telephone regarding your cognitive health, ability to complete daily tasks, and behaviour. If you see your family member or friend in person, you may choose to share this information package with them. Otherwise, we can arrange to send a physical or electronic copy to them.



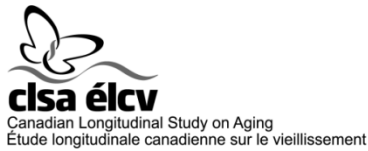

5 Please read the **Participant Study Information Package** carefully. We will call you in the  
6 next few weeks and you will have an opportunity to ask any questions you may have. You  
7 may also find it helpful to discuss this study with your friends and family.  
8

9 If you wish to contact us directly, please feel free to:

- 11 • Email at **info@clsa-elcv.ca**
- 12
- 13 • Call our toll-free line at **1-866-999-8303**
- 14
- 15
- 16

17 Thank you,  
18  
19  
20  
21  
22  
23  
24  
25  
26  
27  
28  
29  
30  
31  
32  
33  
34  
35  
36  
37  
38  
39  
40  
41  
42  
43  
44  
45  
46  
47  
48  
49  
50  
51  
52  
53  
54  
55  
56  
57  
58  
59  
60

For peer review only

## PARTICIPANT STUDY INFORMATION PACKAGE

**Study Title:** Canadian Longitudinal Study on Aging (CLSA) Memory Study

### Principal Investigators:

Dr. Lauren Griffith, Department of Health Research Methods, Evidence, and Impact, McMaster University

Dr. Andrew Costa, Department of Health Research Methods, Evidence, and Impact, McMaster University

Dr. Parminder Raina, Department of Health Research Methods, Evidence, and Impact, McMaster University

### Co-Investigators:

#### Newfoundland and Labrador

Dr. Gerry Mugford – Memorial University

#### Nova Scotia

Dr. Susan Kirkland – Dalhousie University

#### Quebec

Dr. Benoît Cossette – Université de Sherbrooke

Dr. Christina Wolfson – McGill University

#### Ontario

Dr. Cynthia Balion – McMaster University

Dr. Aaron Jones – McMaster University

Dr. Alexandra Mayhew – McMaster University

Dr. Vanessa Taler – University of Ottawa

Dr. Mary Thompson – University of Waterloo

Dr. Changbao Wu – University of Waterloo

#### Manitoba

Dr. Verena Menec – University of Manitoba

#### Saskatchewan

Dr. Megan O'Connell – University of Saskatchewan

#### Alberta

Dr. David Hogan – University of Calgary

Dr. Eric Smith – University of Calgary

#### British Columbia

Dr. Scott Hofer – University of Victoria

Dr. Teresa Liu-Ambrose – University of British Columbia

Dr. Andrew Wister – Simon Fraser University

### Supported by:

The Public Health Agency of Canada

**Conflicts of interest:** There are no conflicts of interest to declare related to this study.

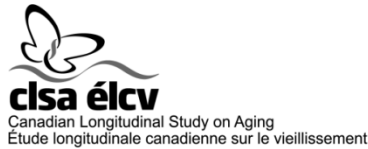

## What is the purpose of the CLSA Memory Study?

- The purpose of this research study is to determine whether information that is collected through CLSA interviews can be used to correctly identify individuals who have memory problems and individuals without memory problems.

## How many people will take part in the CLSA Memory Study?

- We will recruit approximately 600 participants from the 11 CLSA Data Collection Sites in Canada (Surrey, British Columbia; Victoria, British Columbia; Vancouver, British Columbia; Calgary, Alberta; Winnipeg, Manitoba; Hamilton, Ontario; Ottawa, Ontario; Montréal, Quebec; Sherbrooke, Quebec; Halifax, Nova Scotia; and St. John's, Newfoundland).
- This study will take approximately two years to complete and the results should be known in approximately three years.

## What will I be asked to do if I volunteer to be part of the CLSA Memory Study?

- **A staff member from your local Data Collection Site will contact you to discuss the CLSA Memory Study in the next couple of weeks.** You will have an opportunity to ask any questions that you may have. If you are interested in participating in the CLSA Memory Study, the CLSA staff member will ask you a few questions to assess if you are eligible to participate and to determine that you understand the study before asking for your consent to participate.
- **Book an appointment for your medical assessment with a study physician at your local Data Collection Site.** This appointment will take place at a time convenient for you and the assessment will last one hour. If you have not yet completed your main CLSA Follow-up 3 interview, your medical assessment appointment will be scheduled on a separate date.



- 1  
2  
3  
4  
5  
6 • **Identify a family member or friend who knows you well and can respond**  
7 **to questions about your cognitive health, ability to complete daily tasks,**  
8 **and behaviour.**  
9
  - 10 ○ We will ask for the name and phone number of your family member or  
11 friend when we call to book your medical assessment. If possible, we ask  
12 that you discuss the study with this person and to let them know to expect a  
13 phone call from the CLSA.  
14  
15
  - 16
  - 17 ○ Your family member or friend will be asked to complete a 20-minute  
18 interview with a CLSA staff member over the phone before your medical  
19 assessment. You do not need to be present for the interview with your  
20 family member or friend. Your family member or friend may be contacted  
21 after your medical assessment to clarify the information provided.  
22  
23
  - 24
  - 25 ○ The CLSA will not share any personal information about you with your  
26 family member or friend.  
27  
28
- 29  
30 • **The day before your appointment, the CLSA may contact you to review**  
31 **the screening questions for COVID symptoms and exposure, depending**  
32 **on the requirements of their institution.**  
33  
34
- 35 • **You will visit your local Data Collection Site for your medical**  
36 **assessment with the study physician.** The day of your appointment, the  
37 Data Collection Site may review the screening questions for COVID  
38 symptoms and exposure, according to their own protocols. The study  
39 physician will:  
40  
41
  - 42 ○ Conduct an assessment which will include questions about your medical  
43 history, your habits, and your ability to do everyday activities.  
44  
45
  - 46 ○ Ask you to complete a brief cognitive test which includes answering  
47 questions and drawing on paper.  
48  
49
  - 50 ○ Assess your neurological function by assessing your ability to see,  
51 observing you move, and listening to you speak.  
52  
53  
54  
55  
56  
57  
58

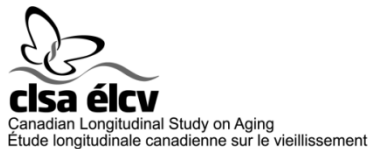

- Ask what medications you are taking. We ask that you bring your physical medications or a list of your medications to your medical assessment for the study physician to review.

### **Will I receive a medical diagnosis from the CLSA Memory Study?**

- The study physician will determine if there is a potential concern about your memory or if your memory seems normal. This is not considered a medical diagnosis.
- If the study physician identifies a potential concern about your memory, they will give you a letter about the study and some of your individual results that you may want to share with your family doctor.
- If you do not have a family doctor, the study physician will provide you with some suggested resources regarding the potential concern about your memory.

### **Will I get any personal benefit from taking part in the CLSA Memory Study?**

- You will not get any direct personal benefit from taking part in the CLSA Memory Study.
- Your participation in the CLSA Memory Study will contribute to potentially developing new ways to identify individuals with memory problems, even if they have not been diagnosed by a physician.

### **Are there any risks from taking part in the CLSA Memory Study?**

- There are no direct medical risks associated with participation in this study.
- Some participants may feel tired or frustrated during the medical assessment with the study physician. If you need a break during the medical assessment, please ask the study physician.
- Some participants may feel worried about if the study physician will identify a potential concern about their memory. Participants identified as having a



potential concern about their memory will have an opportunity to speak with the study physician to discuss their concerns.

- It is important to understand that since participation in the CLSA Memory Study will require travel outside your home and potentially increased exposure to others, it may increase your risk of exposure to COVID-19. The Data Collection Sites follow established protocols for working safety during the pandemic and include maintaining physical distance of 2 metres whenever possible and use of appropriate personal protective equipment. The information related to the risks of COVID-19 changes every day, and the risk-reduction strategies that are most effective are also adjusted to meet these changes.

### **Will there be a cost to me to take part in this study?**

- Your participation in this research study will not involve any costs to you except the time it takes you to complete the medical assessment. You will be given \$30 to cover any expenses incurred when visiting the Data Collection Site.

### **How will the information I provide to the CLSA Memory Study be used?**

- The data you provide to the CLSA Memory Study will be used to develop a method of identifying CLSA participants who have memory problems and individuals without memory problems in the main CLSA study.
- If the results of this study are published, your identity will remain confidential. It is expected that the information collected during this study will be used for analyses and will be published and presented to the scientific community at meetings and in journals.

### **How will my information be managed and kept safe?**

- As with all studies that collect personal information, there is a remote possibility that third parties such as an insurance company or employer could access the information you have provided without permission of the CLSA. Many levels of safeguards have been put in place to reduce this risk.

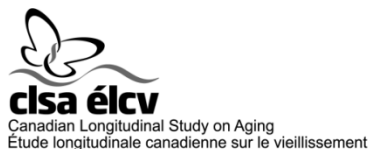

- All identifiable information will be kept in a secure database with a unique study number at McMaster University and will only be used to contact you. The information that you provide for us, without your name or contact information, will be stored in a secure database at McMaster University. Data collected by interviewers are transferred to the McMaster database over secure, encrypted connections.
- All CLSA staff will sign an agreement to protect your privacy and confidentiality.
- The CLSA Memory Study data will not be available to other researchers through our general study data access processes. Any requests to access the CLSA Memory Study data will need to be submitted to and approved by the CLSA Memory Study principal investigators. Researchers using data from the CLSA Memory Study will not be provided with any identifying information.
- Records identifying you as a participant in the CLSA Memory Study will be kept confidential and, to the extent permitted by the applicable laws, will not be disclosed or made publicly available, except as described in this document. If required, direct authorized representatives of the following organizations may look at your original identifiable data to check that the information collected for the study is correct and follow proper laws and guidelines:
  - The research ethics boards who oversee the ethical conduct of this study at each institution
- If you would like more information about how the CLSA protects your data, please contact us by email at **info@clsa-elcv.ca** or telephone at **1-866-999-8303**.
- Every effort will be made to keep the information you provide private, but risk of accidental disclosure is possible.

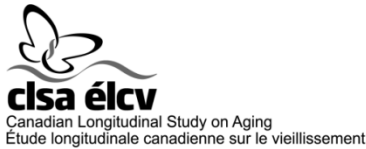

## What if I decide at some point that I no longer want to be part of the CLSA Memory Study?

- Your agreement to participate in the CLSA Memory Study is entirely voluntary.
- Your decision to participate in the CLSA Memory Study does not affect your ongoing participation in the main CLSA study that you have participated in since 2011-2015.
- You can choose to end your participation in this research (called withdrawal) at any time without having to provide a reason. If you choose to withdraw from the study, you are encouraged to contact the research team.
- If you decide to leave the study, we will stop contacting you for the CLSA Memory Study.
- You may ask that the information that was collected about you not be used for the study. However, once the study results have been released, we will not be able to be removed it from our datasets. If you have any questions about the CLSA Memory Study, please contact us using the provided email address or telephone number.

By email  
**info@clsa-elcv.ca**

By telephone  
**1-866-999-8303**



## Can participation in the CLSA Memory Study end early?

- Your participation in the CLSA Memory Study may be stopped early, and without your consent, for reasons such as:
  - New information shows that the research is no longer in your best interest
  - The research team decides to stop the study
  - The research ethics board withdraw permission for the study to continue

## What are the rights of participants in a research study?

- You will be told in a timely manner, about new information that may be relevant to your willingness to stay in this study.
- You have the right to be informed of the overall results of this research once the entire study is complete. As a person taking part in the main CLSA study, you have chosen if you would like to be sent regular updates about the study progress through electronic or mailed newsletters. The results of the CLSA Memory Study will be shared with all CLSA participants through those newsletters. Information about ongoing research, the research team, and general study results will be posted on the CLSA website ([www.clsa-elcv.ca](http://www.clsa-elcv.ca)) as well.
- Your rights to privacy are legally protected by federal and provincial laws that require safeguards to ensure that your privacy is respected.
- If you consent to participate in the CLSA Memory Study, you do not give up any of your legal rights against the research team, the Public Health Agency of Canada, or involved institutions for compensation, nor does this form relieve the research team, the Public Health Agency of Canada, or their agents of their legal and professional responsibilities.

- Each research ethics board has reviewed this study. The research ethics boards are responsible for ensuring that participants are informed of the risks associated with the research, and that participants are free to decide if participation is right for them. If you have any questions regarding your rights as a research participant, you may contact the Research Ethics Board associated with your Data Collection Site:

**Note: Please do not call the Ethics office for rescheduling or cancelling appointment. Please call the CLSA toll-free number (1-866-999-8303).**

### **BRITISH COLUMBIA**

#### **BURNABY**

Office of Research Ethics  
Simon Fraser University  
8888 University Drive  
Multi-Tenant Facility  
Burnaby BC V5A 1S6  
Phone: (778) 782-6593  
E-mail: dore@sfu.ca

#### **VICTORIA**

Human Research Ethics Office of Research  
Services  
University of Victoria  
Administrative Services Building (ASB), Room  
B202  
PO Box 1700 Stn CSC  
3800 Finnerty Road  
Victoria BC V8W 2Y2  
Phone: (250) 472-4545

#### **VANCOUVER**

University of British Columbia  
Office of Research Services  
6190 Agronomy Road  
Vancouver BC V6T 1Z3  
Phone: toll free 1-877-822-8298  
Phone: local (604) 822-8598

Vancouver Island Health Authority  
Research Ethics and Compliance Office  
Queen Alexandra Centre, Main Building Room  
205  
2400 Arbutus Road  
Victoria BC V8N 1V7  
Phone: (250) 519-6726

---

**ALBERTA****CALGARY**

Conjoint Health Research Ethics Board  
University of Calgary  
Phone: (403) 220-7990

**MANITOBA****WINNIPEG**

Bannatyne Campus  
Research Ethics Board  
University of Manitoba  
P126 Pathology Building  
770 Bannatyne Avenue  
Winnipeg MB R3E 0W3  
Phone: (204) 789-3883

---

**ONTARIO****HAMILTON**

Office of the Chair  
Hamilton Integrated Research Ethics Board  
(HiREB)  
293 Wellington Street North  
Hamilton ON L8L 8E7  
Phone: (905) 521-2100 ext. 42013

**OTTAWA**

Chair, Bruyère Research Ethics Board  
43 Bruyère Street  
Ottawa ON K1N 5C8  
Phone: (613) 562-6262 ext. 4003  
E-mail: REB@bruyere.org

**QUEBEC****MONTREAL**

Ms. Ilde Lepore  
Senior Ethics Administrator  
McGill Institutional Review Board  
McGill University Faculty of Medicine  
McIntyre Medical Building  
#633-3655 Promenade Sir William Osler  
Montreal QC H3G 1Y6  
Phone: (514) 398-8302  
E-mail: ilde.lepore@mcgill.ca

**SHERBROOKE**

CÉR du CIUSSS de l'Estrie-CHUS  
3001, 12e Avenue Nord,  
Sherbrooke, QC J1H 5N4  
819 346-1110, poste 12856  
ethique.recherche.ciusse-  
chus@ssss.gouv.qc.ca

---

**NOVA SCOTIA****HALIFAX**

Director  
Office of Research Ethics Administration  
Dalhousie University  
6299 South Street  
2nd Floor, Suite 231  
Halifax NS B3H 4H6  
Phone: (902)-494-1462

---

**NEWFOUNDLAND & LABRADOR****St. JOHN'S**

Memorial University  
Faculty of Medicine  
Health Research Ethics Authority  
2<sup>nd</sup> Floor, Bonaventure Place  
95 Bonaventure Avenue  
St. John's NL, A1B 2X5  
Phone: (709) 777-6974

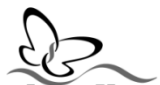

**clsa élcv**

Canadian Longitudinal Study on Aging  
Étude longitudinale canadienne sur le vieillissement

1  
2  
3  
4  
5  
6  
7  
8  
9  
10  
11  
12  
13  
14  
15  
16  
17  
18  
19  
20  
21  
22  
23  
24  
25  
26  
27  
28  
29  
30  
31  
32  
33  
34  
35  
36  
37  
38  
39  
40  
41  
42  
43  
44  
45  
46  
47  
48  
49  
50  
51  
52  
53  
54  
55  
56  
57  
58  
59  
60

For peer review only

1 **Supplementary Appendix 2 – Participant Consent Scripts**

2

3

4

5

6

7

8 **Participant Consent Script – Tracking Cohort ..... 1**

9

10 **Participant Consent Script – Comprehensive Cohort ..... 11**

11

12

13

14

15

16

17

18

19

20

21

22

23

24

25

26

27

28

29

30

31

32

33

34

35

36

37

38

39

40

41

42

43

44

45

46

47

48

49

50

51

52

53

54

55

56

57

58

59

60

For peer review only

## CLSA Memory Study

Participant Consent and Administrative (Informant Identification, Medical Assessment Booking)

– Tracking Cohort Scripts Version 1.0

February 1<sup>st</sup>, 2023

Page 1 of 24

**Using the Canadian Longitudinal Study on Aging (CLSA) Platform to Validate Algorithms to Identify Participants with Dementia (Major Neurocognitive Disorder) and Mild Neurocognitive Disorder in the CLSA (CLSA Memory Study)**

**Participant Consent Script – Tracking Cohort**

Each section (e.g., PARINTRO, PARINFO, PARPRE and PARCON) represents a screen of the consent script.

**INTRODUCTION****PARINTRO1**

Hello. I am calling on behalf of the Canadian Longitudinal Study on Aging (CLSA) Memory Study. We recently provided you with an information package about the study. Have you had a chance to read the information package?

Yes \_\_\_\_\_ **Continue**

No \_\_\_\_\_ **Go to PARINTRO3**

**PARINTRO2**

After reading the CLSA Memory Study description, are you interested in discussing participating in the CLSA Memory Study?

Yes \_\_\_\_\_ **Go to PAR\_INFO1**

No \_\_\_\_\_ **Go to REFUSAL**

**PARINTRO3**

Did you receive the information package?

**[DO NOT READ: Participants were given the information package during their in-home interview or it was sent by mail or email if the participant had already completed their follow up 3 interview.]**

Yes \_\_\_\_\_ **Continue**

No \_\_\_\_\_ **Go to PARINTRO6**

**PARINTRO4**

Would you like for us to call back in a few days when you have had a chance to read the information package?

Yes \_\_\_\_\_ **Continue**

No \_\_\_\_\_ **Go to REFUSAL**

**PARINTRO5**

**[DO NOT READ: Book a call back time for the participant to complete the informed consent process. Please hit “previous” until you get to the question asking if the participant has received the information package so it will open at the correct spot when you call back.]**

## CLSA Memory Study

Participant Consent and Administrative (Informant Identification, Medical Assessment Booking)

– Tracking Cohort Scripts Version 1.0

February 1<sup>st</sup>, 2023

Page 2 of 24

Thank you for your interest in the CLSA Memory Study. We look forward to speaking with you again soon to review the information package.

**END INTERVIEW**

**PARINTRO6** Would you like for us to resend the CLSA Memory Study Participant Information Package?

Yes \_\_\_\_\_ **Continue**

No \_\_\_\_\_ **Go to REFUSAL**

**PARINTRO7** **[DO NOT READ: Please arrange for the CLSA Memory Study participant information package to be sent by email or mail to the participant. Let the participant know you will call back in a few days if the information package was sent by email or in a week or two if the information package was sent by mail. Please hit “previous” until you get to the question asking if the participant has received the information package so it will open in the correct spot when you call back.]**

Thank you for your interest in the CLSA Memory Study. We look forward to speaking with you again soon to review the information package.

**END INTERVIEW****INFORMATION**

**PARINFO1** During this phone call, we will review some of the key information about the CLSA Memory Study. You will be able to ask any questions you have about the study. If you are interested in participating, I will ask some questions to see if you are eligible to participate. If you are eligible to participate, we will complete the consent process.

The purpose of the CLSA Memory Study is to determine whether information that is collected through CLSA interviews can be used to correctly identify individuals who have memory problems and individuals without memory problems. Participants in the CLSA Memory Study will be asked to:

- 1) Undergo a medical assessment by a study physician at their local CLSA Data Collection Site. Please note, your participation in the CLSA has previously included interviews conducted over the phone. Participation in the CLSA Memory Study will require you to come into a CLSA Data Collection Site located within 50km of your home. CLSA Memory Study participant will be given \$30 to cover any expenses incurred when visiting the Data Collection Site. The assessment done at the Data Collection Site will include questions about medical history and a brief cognitive test which includes answering questions and drawing on paper. The doctor will also complete a neurocognitive examination, which involves assessing your ability to see, observing you move, and listening to you speak.
- 2) Identify a family member or friend to complete an interview by phone regarding your cognitive health, ability to complete daily tasks, and behaviour. Your family member or friend will not be required to come to the CLSA Data Collection Site.

**Continue**

**PARINFO2** At the end of the medical assessment, the study physician will tell you if they think there is a potential concern about your memory or if your memory seems normal. This is not considered a medical diagnosis. If the study physician identifies a potential concern about your memory, they will give you a letter about

## CLSA Memory Study

Participant Consent and Administrative (Informant Identification, Medical Assessment Booking)

– Tracking Cohort Scripts Version 1.0

February 1<sup>st</sup>, 2023

Page 3 of 24

the study and some of your individual results that you may want to share with your family doctor. If you do not have a family doctor, the study physician will provide you with some suggested resources regarding the potential concern about your memory.

There are no direct benefits to you from taking part in the CLSA Memory Study, but your participation will contribute to potentially developing new ways to identify people with memory problems.

There are no direct medical risks associated with participation in this study. However, some participants may feel tired or frustrated during the medical assessment. Participants may take breaks from the medical assessment as needed. Some participants may also feel worried about if the study physician will identify a potential concern about their memory. Participants will have an opportunity to speak with the study physician to discuss their concerns.

**Continue**

**PARINFO3** Do you have any questions you would like to ask about the CLSA Memory Study?

**[DO NOT READ: Respond to all participant questions before continuing.]**

**PARINFO4** Are you interested in finding out if you are eligible to participate in the CLSA Memory Study?

Yes \_\_\_\_\_ **Go to PARPRE1**

No \_\_\_\_\_ **Go to Refusal**

**PRECONSENT**

**PARPRE1** I am now going to ask you a few questions to determine your eligibility to participate in the CLSA Memory Study. You may refer to the participant information package to help you answer these questions. Please also let me know if you would like to discuss any of the questions before you answer.

**[Interviewer note: The goal of these questions is to determine if the participant understands enough about the CLSA Memory Study to provide informed consent. Participants are not expected to have the study information package memorized or to use the exact wording in their response.**

**If a participant does not answer a question correctly, a script will appear that provides information regarding that section of the information package. The question is then asked a second time. If the participant is unable to answer the question on the second attempt, the remaining questions will be skipped.]**

**PARPRE2A** What is the purpose of the study that was just described to you?

**[DO NOT READ: Did the participant's response indicate that the study is about identifying people with memory problems?]**

Yes \_\_\_\_\_ **Go to PARPRE3A**

No \_\_\_\_\_ **Continue**



## CLSA Memory Study

Participant Consent and Administrative (Informant Identification, Medical Assessment Booking)

– Tracking Cohort Scripts Version 1.0

February 1<sup>st</sup>, 2023

Page 4 of 24

**PARPRE2B** The purpose of this research study is to determine whether information that is collected through CLSA interviews can be used to correctly identify individuals who have memory problems and individuals without memory problems.

In your own words, can you tell me why this study is being done?

**[DO NOT READ: Did the participant's response indicate that the study is about identifying people with memory problems?]**

Yes \_\_\_\_\_ **Continue**

No \_\_\_\_\_ **PARPRE11**

**PARPRE3A** Tell me something you will be asked to do during the study.

**[DO NOT READ: Did the participant's response indicate that they will have to come to the Data Collection Site to complete a medical assessment or that they would be asked to identify a family member or friend as an informant?]**

Yes \_\_\_\_\_ **PARPRE4A**

No \_\_\_\_\_ **Continue**

**PARPRE3B** Participants in the CLSA Memory Study will undergo a medical assessment by a study physician at the CLSA Data Collection Site. The assessment will include questions about medical history and a brief cognitive test which includes answering questions and drawing on paper. The doctor will also complete a neurocognitive examination, which involves assessing your ability to see, observing you move, and listening to you speak.

In your own words, can you tell me something you will be asked to do during the study?

**[DO NOT READ: Did the participant's response indicate that they will have to come to the Data Collection Site to complete a medical assessment or that they would be asked to identify a family member or friend as an informant?]**

Yes \_\_\_\_\_ **Continue**

No \_\_\_\_\_ **PARPRE11**

**PARPRE4A** Can you tell me a possible risk to you of being in this study?

**[DO NOT READ: Did the participant's response indicate that feeling tired or frustrated during the medical assessment or that worrying about the study physician identifying a potential concern about their cognition are potential risks of this study?]**

Yes \_\_\_\_\_ **Go to PARPRE5A**

No \_\_\_\_\_ **Continue**

## CLSA Memory Study

## Participant Consent and Administrative (Informant Identification, Medical Assessment Booking)

– Tracking Cohort Scripts Version 1.0

February 1<sup>st</sup>, 2023

Page 5 of 24

**PARPRE4B** [DO NOT READ: Did the participant mention that they may be exposed to COVID-19 as a potential risk of this study?]

Yes \_\_\_\_\_ **Go to PARPRE4C**

No \_\_\_\_\_ **Go to PARPRE4D**

**PARPRE4C** In addition to the risk of exposure to COVID-19, feeling tired or frustrated during the medical assessment or worrying that the study physician will identify a potential concern about your cognition are potential risks of this study.

**Go to PARPRE5A**

**PARPRE4D** There are no direct medical risks associated with participation in this study. However, some participants may feel tired or frustrated during the medical assessment. Participants may take breaks from the medical assessment as needed. Some participants may also feel worried about if the study physician will identify a potential concern about their memory. Participants identified as having a potential concern about their memory will have an opportunity to speak with the study physician to discuss their concerns.

In your own words, can you please tell me a possible risk of participating in this study?

[DO NOT READ: Did the participant's response indicate that feeling tired or frustrated during the medical assessment **or** that worrying about the study physician identifying a potential concern about their cognition are potential risks of this study? ]

Yes \_\_\_\_\_ **Continue**

No \_\_\_\_\_ **PARPRE11**

**PARPRE5A** Will you receive a medical diagnosis by participating in this study?

[DO NOT READ: Did the participant's response indicate that they understand that being told if there is a potential concern about their memory or not by the study physician is not the same as a medical diagnosis?]

Yes \_\_\_\_\_ **Go to PARPRE6A**

No \_\_\_\_\_ **Continue**

**PARPRE5B** The study physician will determine if there is a potential concern about your memory or if your memory seems normal. This is not considered a medical diagnosis and does not replace your usual medical care. If the study physician identifies a potential concern about your memory, they will give you a letter about the study and some of your individual results that you may want to share with your family doctor. If you do not have a family doctor, the study physician will provide you with some suggested resources regarding the potential concern about your memory.

## CLSA Memory Study

Participant Consent and Administrative (Informant Identification, Medical Assessment Booking)

– Tracking Cohort Scripts Version 1.0

February 1<sup>st</sup>, 2023

Page 6 of 24

Based on this explanation, will you receive a medical diagnosis by participating in this study?

**DO NOT READ:** Did the participant's response indicate that they understand that being told if there is a potential concern about their memory or not by the study physician is not the same as a medical diagnosis?]

Yes \_\_\_\_\_ **Continue**

No \_\_\_\_\_ **PARPRE11**

**PARPRE6A** Do you have to participate in this study if you do not want to participate?

**[DO NOT READ:** Does the participant's response indicate that they understand that participation in the CLSA Memory Study is voluntary?]

Yes \_\_\_\_\_ **Go to PARPRE7A**

No \_\_\_\_\_ **Continue**

**PARPRE6B** Your agreement to participate in the CLSA Memory Study is voluntary. Your decision to participate in the CLSA Dementia Memory does not affect your ongoing participation in the main CLSA study that you have participated in since 2012-2015.

Based on this explanation, do you have to participate in this study if you do not want to participate?

**[DO NOT READ:** Does the participant's response indicate that they understand that participation in the CLSA Memory Study is voluntary?]

Yes \_\_\_\_\_ **Continue**

No \_\_\_\_\_ **PARPRE11**

**PARPRE7A** If you want to drop out of the study, when can you do this?

**[DO NOT READ:** Does the participant's response indicate that they understand that they may drop out (or withdraw) from the study at any point?]

Yes \_\_\_\_\_ **Go to PARPRE8A**

No \_\_\_\_\_ **Continue**

**PARPRE7B** You can choose to end your participation in the CLSA Memory Study at any time for any reason. If you decide to leave the study, we will stop contacting you about the CLSA Memory Study. You may ask that the information collected about you not be used for the study. However, if the study results have been released, we will not be able to remove your data from our datasets.

## CLSA Memory Study

Participant Consent and Administrative (Informant Identification, Medical Assessment Booking)

– Tracking Cohort Scripts Version 1.0

February 1<sup>st</sup>, 2023

Page 7 of 24

Based on this information, when can you drop out from the study?

**[DO NOT READ:** Did the participant's response indicate that they understand that they can drop out (or withdraw) from the study whenever they would like?]

Yes \_\_\_\_\_ **Continue**

No \_\_\_\_\_ **PARPRE11**

**PARPRE8A** Will your data for the CLSA Memory Study be kept confidential?

**[DO NOT READ:** Did the participant's response indicate that they understood that their data will be kept confidential?]

Yes \_\_\_\_\_ **PARPRE9**

No \_\_\_\_\_ **Continue**

**PARPRE8B** The data you provide to the CLSA Memory Study will be kept confidential. Information that can identify you such as your name and phone number will be kept in a secure database with a unique study identification number. This information will only be used to contact you. Researchers using data from the CLSA Memory Study will not be provided with any identifying information.

Based on this explanation, will your data be kept confidential?

**[DO NOT READ:** Did the participant's response indicate that they understood that their data will be kept confidential?]

Yes \_\_\_\_\_ **Continue**

No \_\_\_\_\_ **PARPRE11**

**PARPRE9** **[DO NOT READ:** Based on your discussion with the participant, do you feel that the participant has sufficient understanding of the CLSA Memory Study to provide consent to participate?]

Yes \_\_\_\_\_ **Continue**

No \_\_\_\_\_ **PARPRE12**

**PARPRE10** **[SHOW IF (PARPRE2A OR PARPRE2B) AND (PARPRE3A OR PARPRE3B) AND (PARPRE4A OR PARPRE4B OR PARPRE4D) AND (PARPRE5A OR PARPRE5B) AND (PARPRE6A OR PARPRE6B) AND (PARPRE7A OR PARPRE7B) AND (PARPRE8A OR PARPRE8B) AND PARPRE9 ARE "YES"]**

**[DO NOT READ:** The participant answered all of the questions correctly and is eligible to participate in the study.]

## CLSA Memory Study

Participant Consent and Administrative (Informant Identification, Medical Assessment Booking)

– Tracking Cohort Scripts Version 1.0

February 1<sup>st</sup>, 2023

Page 8 of 24

**Go to PARCON1****PARPRE11** [SHOW IF RESPONSE TO ONE OF PARPRE2B, PARPRE3B, PARPRE4D, PARPRE5B, PARPRE6B, PARPRE7B, OR PARPRE8B WAS “NO”]**[DO NOT READ:** The participant did not answer a question correctly.]**Continue****PARPRE12** Based on the questions I have asked you, we would like another staff member to speak with you to determine if you are eligible to participate in the CLSA Memory Study. Do I have your permission for the other staff member to contact you?Yes \_\_\_\_\_ **Go to PARPRE14**No \_\_\_\_\_ **Continue****PARPRE13** You have told me that you do not want another staff member to contact you. This means that you will not be able to participate in the CLSA Memory Study. Thank you for taking the time to learn about the CLSA Memory Study. We will be in touch with you in the future regarding the main CLSA study.**[DO NOT READ: Click “Next” and confirm the participant does not want to participate in the CLSA Memory Study (Go to REFUSAL1)]****PARPRE14** Thank you. The other staff member will call you in within the next week to further discuss your eligibility for the CLSA Memory Study.**[DO NOT READ:** Please include any relevant notes in Sabretooth that may assist the CLSA Memory Study staff member in their discussion with the participant.**END INTERVIEW]****CONSENT**

I will now read a list of statements. Please indicate you if agree or disagree with each statement.

**PARCON1** I have read the participant information package for the Canadian Longitudinal Study on Aging (CLSA) Memory Study and I understand it.Disagree \_\_\_\_\_ **Go to Refusal**Agree \_\_\_\_\_ **Continue****PARCON2** I have had a chance to ask questions about the study, and all my questions have been answered.Disagree \_\_\_\_\_ **Go to Refusal**Agree \_\_\_\_\_ **Continue**

## CLSA Memory Study

Participant Consent and Administrative (Informant Identification, Medical Assessment Booking)

– Tracking Cohort Scripts Version 1.0

February 1<sup>st</sup>, 2023

Page 9 of 24

**PARCON3** I do not give up any of my legal rights by verbally consenting to participate in the CLSA Memory Study.

Disagree \_\_\_\_\_ **Go to Refusal**

Agree \_\_\_\_\_ **Continue**

**PARCON4** I understand that my information will be used for research purposes only and this research may also have commercial uses that benefit society.

Disagree \_\_\_\_\_ **Go to Refusal**

Agree \_\_\_\_\_ **Continue**

**PARCON5** I understand that I can withdraw my consent at any time. If I choose to withdraw consent, I will be offered options for how the information already collected about me will be used.

Disagree \_\_\_\_\_ **Go to Refusal**

Agree \_\_\_\_\_ **Continue**

**PARCON6** I understand that participation in the CLSA Memory Study will require me to visit a CLSA Data Collection Site located within 50km of my home and that I will be given \$30 to cover any expenses incurred when visiting the Data Collection Site. My future participation in the main CLSA study will continue to be over the phone.

Disagree \_\_\_\_\_ **Go to Refusal**

Agree \_\_\_\_\_ **Continue**

**PARCON7** I will now read the consent statement and ask that you please respond with either 'yes' or 'no'. This will act as your consent to participate in the CLSA Memory Study. I agree to take part in the CLSA Memory Study.

Disagree \_\_\_\_\_ **Go to Refusal**

Agree \_\_\_\_\_ **Continue**

**PARCON8** Thank you for consenting to participate in the CLSA Memory Study.

**END INTERVIEW AND CLICK SUBMIT.**

|                |
|----------------|
| <b>REFUSAL</b> |
|----------------|

**IF ANSWER IS 'NO' TO PARINTRO1 OR PARINFO3 OR PARCON8 IF ANSWER IS 'DISAGREE' TO PARCON1, PARCON2, PARCON3, PARCON4, PARCON5, PARCON6, OR PARCON7**

## CLSA Memory Study

Participant Consent and Administrative (Informant Identification, Medical Assessment Booking)

– Tracking Cohort Scripts Version 1.0

February 1<sup>st</sup>, 2023

Page 10 of 24

**REFUSAL1**     **DO NOT READ: Check the "participant does not wish to participate" option below to confirm that the participant does not want to participate in the CLSA Memory Study.**

**REFUSAL2**     Thank you for taking the time to learn about the CLSA Memory Study.

We will be in touch with you in the future regarding the main CLSA study.

**END INTERVIEW AND CLICK SUBMIT.**

**CONCLUSION SCREEN**

**You have completed the CLSA Memory Study Participant Consent Script. You may now exit this window.**

## CLSA Memory Study

Participant Consent and Administrative (Informant Identification, Medical Assessment Booking)

– Tracking Cohort Scripts Version 1.0

February 1<sup>st</sup>, 2023

Page 11 of 24

**Using the Canadian Longitudinal Study on Aging (CLSA) Platform to Validate Algorithms to Identify Participants with Dementia (Major Neurocognitive Disorder) and Mild Neurocognitive Disorder in the CLSA (CLSA Memory Study)**

**Participant Consent Script – Comprehensive Cohort**

Each section (e.g., PARINTRO, PARINFO, PARPRE and PARCON) represents a screen of the consent script.

---

**FAMILY MEMBER OR FRIEND CONTACT INFORMATION**

**PARINF\_1** To participate in this study, we need you to identify a family member or friend that can respond to questions about your cognitive health, ability to complete daily tasks, and behaviour. Would you like to identify this person now or have us call back at another time?

Identify family member or friend **now** \_\_\_\_\_ **Continue**

Identify family member or friend **later** \_\_\_\_\_ **Go to PARINF\_5**

**PARINF\_2** **[DO NOT READ: Record the friend or family member identified by the participant as an alternate contact and label as “Memory Study Informant”. If the participant identifies an existing alternate contact as the Memory Study informant, please verify the contact information of the alternate contact before selecting “Memory Study Informant” as an alternate type.]**

**PARINF\_3** Thank you. In the information we sent you for the CLSA Memory Study, we included a copy of the Informant Information Package. Are you able to give the Informant Information Package to your family member or friend, or would you prefer for us to send them a copy?

Participant will give informant the information package \_\_\_\_\_ **Continue**

Data Collection Site will send information package \_\_\_\_\_ **Continue**

**PARINF\_4** We encourage you to discuss the CLSA Memory Study with [family member or friend name] in the next few days and to let him/her know to expect a phone call from us.

**Go to PARMED\_1**

**PARINF\_5** **[DO NOT READ: Book a call back time for the participant to provide the contact information for a family member or friend]**

When we call you to identify a family member or friend, we will also book an appointment for your medical assessment. Thank you for your interest in the CLSA Memory Study and we look forward to speaking with you again soon.

**END INTERVIEW.**

---

**MEDICAL ASSESSMENT BOOKING**

**PARMED\_1** Would you like to schedule a time for your medical assessment with the study physician?



## CLSA Memory Study

Participant Consent and Administrative (Informant Identification, Medical Assessment Booking)

– Tracking Cohort Scripts Version 1.0

February 1<sup>st</sup>, 2023

Page 12 of 24

Book medical assessment **now** \_\_\_\_\_ **Continue**Book medical assessment **later** \_\_\_\_\_ **Go to PARMED\_3**

**PARMED\_2 [DO NOT READ, SITE SPECIFIC: Book medical assessment appointment using your preferred method and the participant's UID. Please confirm the address of the DCS with the participant and any necessary information about parking.]**

Thank you for your interest in the CLSA Memory Study and we look forward to seeing you at your medical assessment.

**END INTERVIEW AND CLICK SUBMIT**

**PARMED\_3 [DO NOT READ: Book a call back time for the participant to schedule a medical assessment.]**

Thank you for your interest in the CLSA Memory Study. We look forward to speaking with you again soon to book your medical assessment.

**END INTERVIEW**

**CONCLUSION SCREEN**

**You have completed the CLSA Memory Study Participant Informant Identification and Medical Assessment Booking Script. You may now exit this window.**

1 CLSA Memory Study  
 2 Participant Consent and  
 3 Administrative (Informant Identification, Medical Assessment Booking) Scripts Version 1.1  
 4 October 11, 2022

Page 1 of 24

5 **Using the Canadian Longitudinal Study on Aging (CLSA) Platform to Validate Algorithms to Identify**  
 6 **Participants with Dementia (Major Neurocognitive Disorder) and Mild Neurocognitive Disorder in the**  
 7 **CLSA (CLSA Memory Study)**

8  
 9 **PARTICIPANT CONSENT SCRIPT**

10  
 11 Each section (e.g., PARINTRO, PARINFO, PARPRE and PARCON) represents a screen of the consent script.

12  
 13 **INTRODUCTION**

14  
 15 **PARINTRO1**

16 Hello. I am calling on behalf of the Canadian Longitudinal Study on Aging (CLSA) Memory Study. We  
 17 recently provided you with an information package about the study. Have you had a chance to read the  
 18 information package?

19  
 20 Yes \_\_\_\_\_ **Continue**

21  
 22 No \_\_\_\_\_ **Go to PARINTRO3**

23  
 24  
 25 **PARINTRO2**

26 After reading the CLSA Memory Study description, are you interested in discussing participating in the  
 27 CLSA Memory Study?

28 Yes \_\_\_\_\_ **Go to PAR\_INFO1**

29  
 30 No \_\_\_\_\_ **Go to REFUSAL**

31  
 32  
 33 **PARINTRO3**

34 Did you receive the information package?

35 **[DO NOT READ: Participants were given the information package during their in-home interview or**  
 36 **it was sent by mail or email if the participant had already completed their follow up 3 interview.]**

37  
 38 Yes \_\_\_\_\_ **Continue**

39  
 40 No \_\_\_\_\_ **Go to PARINTRO6**

41  
 42  
 43 **PARINTRO4**

44 Would you like for us to call back in a few days when you have had a chance to read the information  
 45 package?

46 Yes \_\_\_\_\_ **Continue**

47  
 48 No \_\_\_\_\_ **Go to REFUSAL**

49  
 50  
 51 **PARINTRO5**

52 **[DO NOT READ: Book a call back time for the participant to complete the informed consent**  
 53 **process. Please hit "previous" until you get to the question asking if the participant has received**  
 54 **the information package so it will open at the correct spot when you call back.]**

55 Thank you for your interest in the CLSA Memory Study. We look forward to speaking with you again  
 56 soon to review the information package.

57  
 58 **END INTERVIEW**

CLSA Memory Study  
 Participant Consent and  
 Administrative (Informant Identification, Medical Assessment Booking) Scripts Version 1.1  
 October 11, 2022

Page 2 of 24

**PARINTRO6** Would you like for us to resend the CLSA Memory Study Participant Information Package?

Yes \_\_\_\_\_ **Continue**

No \_\_\_\_\_ **Go to REFUSAL**

**PARINTRO7** **[DO NOT READ: Please arrange for the CLSA Memory Study participant information package to be sent by email or mail to the participant. Let the participant know you will call back in a few days if the information package was sent by email or in a week or two if the information package was sent by mail. Please hit “previous” until you get to the question asking if the participant has received the information package so it will open in the correct spot when you call back.]**

Thank you for your interest in the CLSA Memory Study. We look forward to speaking with you again soon to review the information package.

**END INTERVIEW**

---

## INFORMATION

**PARINFO1** During this phone call, we will review some of the key information about the CLSA Memory Study. You will be able to ask any questions you have about the study. If you are interested in participating, I will ask some questions to see if you are eligible to participate. If you are eligible to participate, we will complete the consent process.

The purpose of the CLSA Memory Study is to determine whether information that is collected through CLSA interviews can be used to correctly identify individuals who have memory problems and individuals without memory problems. Participants in the CLSA Memory Study will be asked to:

- 1) Undergo a medical assessment by a study physician at their local CLSA Data Collection Site. The assessment will include questions about medical history and a brief cognitive test which includes answering questions and drawing on paper. The doctor will also complete a neurocognitive examination, which involves assessing your ability to see, observing you move, and listening to you speak.
- 2) Identify a family member or friend to complete an interview by phone regarding your cognitive health, ability to complete daily tasks, and behaviour.

**Continue**

**PARINFO2** At the end of the medical assessment, the study physician will tell you if they think there is a potential concern about your memory or if your memory seems normal. This is not considered a medical diagnosis. If the study physician identifies a potential concern about your memory, they will give you a letter about the study and some of your individual results that you may want to share with your family doctor. If you do not have a family doctor, the study physician will provide you with some suggested resources regarding the potential concern about your memory.

There are no direct benefits to you from taking part in the CLSA Memory Study, but your participation will contribute to potentially developing new ways to identify people with memory problems.

There are no direct medical risks associated with participation in this study. However, some participants may feel tired or frustrated during the medical assessment. Participants may take breaks from the medical

1 CLSA Memory Study  
 2 Participant Consent and  
 3 Administrative (Informant Identification, Medical Assessment Booking) Scripts Version 1.1  
 4 October 11, 2022

Page 3 of 24

5 assessment as needed. Some participants may also feel worried about if the study physician will identify a  
 6 potential concern about their memory. Participants will have an opportunity to speak with the study  
 7 physician to discuss their concerns.  
 8

9 **Continue**

10 **PARINFO3** Do you have any questions you would like to ask about the CLSA Memory Study?

11 **[DO NOT READ: Respond to all participant questions before continuing.]**

12  
 13  
 14  
 15  
 16 **PARINFO4** Are you interested in finding out if you are eligible to participate in the CLSA Memory Study?

17 Yes \_\_\_\_\_ **Go to PARPRE1**

18 No \_\_\_\_\_ **Go to Refusal**

19  
 20  
 21  
 22  
 23 **PRECONSENT**

24 **PARPRE1** I am now going to ask you a few questions to determine your eligibility to participate in the CLSA Memory  
 25 Study. You may refer to the participant information package to help you answer these questions. Please  
 26 also let me know if you would like to discuss any of the questions before you answer.  
 27

28 **[Interviewer note: The goal of these questions is to determine if the participant understands  
 29 enough about the CLSA Memory Study to provide informed consent. Participants are not expected  
 30 to have the study information package memorized or to use the exact wording in their response.]**

31 **If a participant does not answer a question correctly, a script will appear that provides information  
 32 regarding that section of the information package. The question is then asked a second time. If the  
 33 participant is unable to answer the question on the second attempt, the remaining questions will  
 34 be skipped.]**  
 35  
 36  
 37

38 **PARPRE2A** What is the purpose of the study that was just described to you?

39 **[DO NOT READ: Did the participant's response indicate that the study is about identifying people with  
 40 memory problems?]**

41 Yes \_\_\_\_\_ **Go to PARPRE3A**

42 No \_\_\_\_\_ **Continue**

43  
 44  
 45  
 46  
 47 **PARPRE2B** The purpose of this research study is to determine whether information that is collected through CLSA  
 48 interviews can be used to correctly identify individuals who have memory problems and individuals  
 49 without memory problems.  
 50

51 In your own words, can you tell me why this study is being done?

52 **[DO NOT READ: Did the participant's response indicate that the study is about identifying people with  
 53 memory problems?]**

54 Yes \_\_\_\_\_ **Continue**

55 No \_\_\_\_\_ **PARPRE11**

1 CLSA Memory Study  
2 Participant Consent and  
3 Administrative (Informant Identification, Medical Assessment Booking) Scripts Version 1.1  
4 October 11, 2022

Page 4 of 24

7 **PARPRE3A** Tell me something you will be asked to do during the study.

9 **[DO NOT READ:** Did the participant's response indicate that they will have to come to the Data  
10 Collection Site to complete a medical assessment or that they would be asked to identify a family  
11 member or friend as an informant?]

13 Yes \_\_\_\_\_ **PARPRE4A**

15 No \_\_\_\_\_ **Continue**

18 **PARPRE3B** Participants in the CLSA Memory Study will undergo a medical assessment by a study physician at the  
19 CLSA Data Collection Site. The assessment will include questions about medical history and a brief  
20 cognitive test which includes answering questions and drawing on paper. The doctor will also complete a  
21 neurocognitive examination, which involves assessing your ability to see, observing you move, and  
22 listening to you speak.

23 In your own words, can you tell me something you will be asked to do during the study?

26 **[DO NOT READ:** Did the participant's response indicate that they will have to come to the Data Collection  
27 Site to complete a medical assessment or that they would be asked to identify a family member or friend  
28 as an informant?]

30 Yes \_\_\_\_\_ **Continue**

32 No \_\_\_\_\_ **PARPRE11**

35 **PARPRE4A** **Can you** tell me a possible risk to you of being in this study?

38 **[DO NOT READ:** Did the participant's response indicate that feeling tired or frustrated during the medical  
39 assessment **or** that worrying about the study physician identifying a potential concern about their  
40 cognition are potential risks of this study?]

42 Yes \_\_\_\_\_ **Go to PARPRE5A**

44 No \_\_\_\_\_ **Continue**

47 **PARPRE4B** **[DO NOT READ:** Did the participant mention that they may be exposed to COVID-19 as a potential risk of  
48 this study?]

50 Yes \_\_\_\_\_ **Go to PARPRE4C**

52 No \_\_\_\_\_ **Go to PARPRE4D**

**PARPRE4C** In addition to the risk of exposure to COVID-19, feeling tired or frustrated during the medical assessment or worrying that the study physician will identify a potential concern about your cognition are potential risks of this study.

**Go to PARPRE5A**

**PARPRE4D** There are no direct medical risks associated with participation in this study. However, some participants may feel tired or frustrated during the medical assessment. Participants may take breaks from the medical assessment as needed. Some participants may also feel worried about if the study physician will identify a potential concern about their memory. Participants identified as having a potential concern about their memory will have an opportunity to speak with the study physician to discuss their concerns.

In your own words, can you please tell me a possible risk of participating in this study?

**[DO NOT READ:** Did the participant's response indicate that feeling tired or frustrated during the medical assessment **or** that worrying about the study physician identifying a potential concern about their cognition are potential risks of this study? ]

Yes \_\_\_\_\_ **Continue**

No \_\_\_\_\_ **PARPRE11**

**PARPRE5A** Will you receive a medical diagnosis by participating in this study?

**[DO NOT READ:** Did the participant's response indicate that they understand that being told if there is a potential concern about their memory or not by the study physician is not the same as a medical diagnosis?]

Yes \_\_\_\_\_ **Go to PARPRE6A**

No \_\_\_\_\_ **Continue**

**PARPRE5B** The study physician will determine if there is a potential concern about your memory or if your memory seems normal. This is not considered a medical diagnosis and does not replace your usual medical care. If the study physician identifies a potential concern about your memory, they will give you a letter about the study and some of your individual results that you may want to share with your family doctor. If you do not have a family doctor, the study physician will provide you with some suggested resources regarding the potential concern about your memory.

Based on this explanation, will you receive a medical diagnosis by participating in this study?

**DO NOT READ:** Did the participant's response indicate that they understand that being told if there is a potential concern about their memory or not by the study physician is not the same as a medical diagnosis?]

Yes \_\_\_\_\_ **Continue**

No \_\_\_\_\_ **PARPRE11**

CLSA Memory Study  
Participant Consent and  
Administrative (Informant Identification, Medical Assessment Booking) Scripts Version 1.1  
October 11, 2022

**PARPRE6A** Do you have to participate in this study if you do not want to participate?

**[DO NOT READ: Does the participant's response indicate that they understand that participation in the CLSA Memory Study is voluntary?]**

Yes \_\_\_\_\_ **Go to PARPRE7A**

No \_\_\_\_\_ **Continue**

**PARPRE6B** Your agreement to participate in the CLSA Memory Study is voluntary. Your decision to participate in the CLSA Dementia Memory does not affect your ongoing participation in the main CLSA study that you have participated in since 2012-2015.

Based on this explanation, do you have to participate in this study if you do not want to participate?

**[DO NOT READ: Does the participant's response indicate that they understand that participation in the CLSA Memory Study is voluntary?]**

Yes \_\_\_\_\_ **Continue**

No \_\_\_\_\_ **PARPRE11**

**PARPRE7A** If you want to drop out of the study, when can you do this?

**[DO NOT READ: Does the participant's response indicate that they understand that they may drop out (or withdraw) from the study at any point?]**

Yes \_\_\_\_\_ **Go to PARPRE8A**

No \_\_\_\_\_ **Continue**

**PARPRE7B** You can choose to end your participation in the CLSA Memory Study at any time for any reason. If you decide to leave the study, we will stop contacting you about the CLSA Memory Study. You may ask that the information collected about you not be used for the study. However, if the study results have been released, we will not be able to remove your data from our datasets.

Based on this information, when can you drop out from the study?

**[DO NOT READ: Did the participant's response indicate that they understand that they can drop out (or withdraw) from the study whenever they would like?]**

Yes \_\_\_\_\_ **Continue**

No \_\_\_\_\_ **PARPRE11**

1 CLSA Memory Study  
 2 Participant Consent and  
 3 Administrative (Informant Identification, Medical Assessment Booking) Scripts Version 1.1  
 4 October 11, 2022

Page 7 of 24

7 **PARPRE8A** Will your data for the CLSA Memory Study be kept confidential?

9 **[DO NOT READ:** Did the participant's response indicate that they understood that their data will be kept confidential?]

12 Yes \_\_\_\_\_ **PARPRE9**

14 No \_\_\_\_\_ **Continue**

17 **PARPRE8B** The data you provide to the CLSA Memory Study will be kept confidential. Information that can identify you such as your name and phone number will be kept in a secure database with a unique study identification number. This information will only be used to contact you. Researchers using data from the CLSA Memory Study will not be provided with any identifying information.

21 Based on this explanation, will your data be kept confidential?

24 **[DO NOT READ:** Did the participant's response indicate that they understood that their data will be kept confidential?]

27 Yes \_\_\_\_\_ **Continue**

29 No \_\_\_\_\_ **PARPRE11**

32 **PARPRE9** **[DO NOT READ:** Based on your discussion with the participant, do you feel that the participant has sufficient understanding of the CLSA Memory Study to provide consent to participate?]

36 Yes \_\_\_\_\_ **Continue**

38 No \_\_\_\_\_ **PARPRE12**

41 **PARPRE10** **[SHOW IF (PARPRE2A OR PARPRE2B) AND (PARPRE3A OR PARPRE3B) AND (PARPRE4A OR PARPRE4B OR PARPRE4D) AND (PARPRE5A OR PARPRE5B) AND (PARPRE6A OR PARPRE6B) AND (PARPRE7A OR PARPRE7B) AND (PARPRE8A OR PARPRE8B) AND PARPRE9 ARE "YES"]**

45 **[DO NOT READ:** The participant answered all of the questions correctly and is eligible to participate in the study.]

47 **Go to PARCON1**

49 **PARPRE11** **[SHOW IF RESPONSE TO ONE OF PARPRE2B, PARPRE3B, PARPRE4D, PARPRE5B, PARPRE6B, PARPRE7B, OR PARPRE8B WAS "NO"]**

52 **[DO NOT READ:** The participant did not answer a question correctly.]

54 **Continue**



CLSA Memory Study  
 Participant Consent and  
 Administrative (Informant Identification, Medical Assessment Booking) Scripts Version 1.1  
 October 11, 2022

Page 8 of 24

**PARPRE12** Based on the questions I have asked you, we would like another staff member to speak with you to determine if you are eligible to participate in the CLSA Memory Study. Do I have your permission for the other staff member to contact you?

Yes \_\_\_\_\_ **Go to PARPRE14**

No \_\_\_\_\_ **Continue**

**PARPRE13** You have told me that you do not want another staff member to contact you. This means that you will not be able to participate in the CLSA Memory Study. Thank you for taking the time to learn about the CLSA Memory Study. We will be in touch with you in the future regarding the main CLSA study.

**[DO NOT READ: Click "Next" and confirm the participant does not want to participate in the CLSA Memory Study (Go to REFUSAL1)]**

**PARPRE14** Thank you. The other staff member will call you in within the next week to further discuss your eligibility for the CLSA Memory Study.

**[DO NOT READ: Please include any relevant notes in Sabretooth that may assist the CLSA Memory Study staff member in their discussion with the participant.**

**END INTERVIEW]**

---

## CONSENT

I will now read a list of statements. Please indicate you if agree or disagree with each statement.

**PARCON1** I have read the participant information package for the Canadian Longitudinal Study on Aging (CLSA) Memory Study and I understand it.

Disagree \_\_\_\_\_ **Go to Refusal**

Agree \_\_\_\_\_ **Continue**

**PARCON2** I have had a chance to ask questions about the study, and all my questions have been answered.

Disagree \_\_\_\_\_ **Go to Refusal**

Agree \_\_\_\_\_ **Continue**

**PARCON3** I do not give up any of my legal rights by verbally consenting to participate in the CLSA Memory Study.

Disagree \_\_\_\_\_ **Go to Refusal**

Agree \_\_\_\_\_ **Continue**

**PARCON4** I understand that my information will be used for research purposes only and this research may also have commercial uses that benefit society.

1 CLSA Memory Study  
 2 Participant Consent and  
 3 Administrative (Informant Identification, Medical Assessment Booking) Scripts Version 1.1  
 4 October 11, 2022

Page 9 of 24

5 Disagree \_\_\_\_\_ **Go to Refusal**

6 Agree \_\_\_\_\_ **Continue**

7  
 8  
 9  
 10 **PARCON5** I understand that I can withdraw my consent at any time. If I choose to withdraw consent, I will be  
 11 offered options for how the information already collected about me will be used.

12 Disagree \_\_\_\_\_ **Go to Refusal**

13 Agree \_\_\_\_\_ **Continue**

14  
 15  
 16  
 17 **PARCON6** I will now read the consent statement and ask that you please respond with either 'yes' or 'no'. This will  
 18 act as your consent to participate in the CLSA Memory Study. I agree to take part in the CLSA Memory  
 19 Study.

20 Disagree \_\_\_\_\_ **Go to Refusal**

21 Agree \_\_\_\_\_ **Continue**

22  
 23  
 24  
 25  
 26 **PARCON7** Thank you for consenting to participate in the CLSA Memory Study.

27 **END INTERVIEW AND CLICK SUBMIT.**

### 30 31 REFUSAL

32  
 33 **IF ANSWER IS 'NO' TO PARINTRO1 OR PARINFO3 OR PARCON8 IF ANSWER IS 'DISAGREE' TO PARCON1,  
 34 PARCON2, PARCON3, PARCON4, PARCON5, PARCON6, OR PARCON7**

35  
 36  
 37 **REFUSAL1 DO NOT READ: Check the "participant does not wish to participate" option below to confirm that  
 38 the participant does not want to participate in the CLSA Memory Study.**

39  
 40  
 41 **REFUSAL2** Thank you for taking the time to learn about the CLSA Memory Study.

42 We will be in touch with you in the future regarding the main CLSA study.

43  
 44  
 45 **END INTERVIEW AND CLICK SUBMIT.**

### 46 47 48 49 CONCLUSION SCREEN

50  
 51 **You have completed the CLSA Memory Study Participant Consent Script. You may now exit this window.**

CLSA Memory Study  
 Participant Consent and  
 Administrative (Informant Identification, Medical Assessment Booking) Scripts Version 1.1  
 October 11, 2022

Page 10 of 24

**Using the Canadian Longitudinal Study on Aging (CLSA) Platform to Validate Algorithms to Identify Participants with Dementia (Major Neurocognitive Disorder) and Mild Neurocognitive Disorder in the CLSA (CLSA Memory Study)**

**PARTICIPANT INFORMANT IDENTIFICATION AND MEDICAL ASSESSMENT BOOKING SCRIPT**

Each section (e.g., PARINTRO, PARINFO, PARPRE and PARCON) represents a screen of the consent script.

---

**FAMILY MEMBER OR FRIEND CONTACT INFORMATION**

**PARINF\_1** To participate in this study, we need you to identify a family member or friend that can respond to questions about your cognitive health, ability to complete daily tasks, and behaviour. Would you like to identify this person now or have us call back at another time?

Identify family member or friend **now** \_\_\_\_\_ **Continue**

Identify family member or friend **later** \_\_\_\_\_ **Go to PARINF\_5**

**PARINF\_2** **[DO NOT READ: Record the friend or family member identified by the participant as an alternate contact and label as “Memory Study Informant”. If the participant identifies an existing alternate contact as the Memory Study informant, please verify the contact information of the alternate contact before selecting “Memory Study Informant” as an alternate type.]**

**PARINF\_3** Thank you. In the information we sent you for the CLSA Memory Study, we included a copy of the Informant Information Package. Are you able to give the Informant Information Package to your family member or friend, or would you prefer for us to send them a copy?

Participant will give informant the information package \_\_\_\_\_ **Continue**

Data Collection Site will send information package \_\_\_\_\_ **Continue**

**PARINF\_4** We encourage you to discuss the CLSA Memory Study with **[family member or friend name]** in the next few days and to let him/her know to expect a phone call from us.

**Go to PARMED\_1**

**PARINF\_5** **[DO NOT READ: Book a call back time for the participant to provide the contact information for a family member or friend]**

When we call you to identify a family member or friend, we will also book an appointment for your medical assessment. Thank you for your interest in the CLSA Memory Study and we look forward to speaking with you again soon.

**END INTERVIEW.**

---

**MEDICAL ASSESSMENT BOOKING**

**PARMED\_1** Would you like to schedule a time for your medical assessment with the study physician?

1 CLSA Memory Study  
2 Participant Consent and  
3 Administrative (Informant Identification, Medical Assessment Booking) Scripts Version 1.1  
4 October 11, 2022

Page 11 of 24

6 Book medical assessment **now** \_\_\_\_\_ **Continue**

8 Book medical assessment **later** \_\_\_\_\_ **Go to PARMED\_3**

12 **PARMED\_2 [DO NOT READ, SITE SPECIFIC: Book medical assessment appointment using your preferred  
13 method and the participant's UID.**

15 Thank you for your interest in the CLSA Memory Study and we look forward to seeing you at your medical  
16 assessment.

17 **END INTERVIEW AND CLICK SUBMIT**

21 **PARMED\_3 [DO NOT READ: Book a call back time for the participant to schedule a medical assessment.]**

23 Thank you for your interest in the CLSA Memory Study. We look forward to speaking with you again soon  
24 to book your medical assessment.

26 **END INTERVIEW**

29 **CONCLUSION SCREEN**

31 **You have completed the CLSA Memory Study Participant Informant Identification and Medical Assessment  
32 Booking Script. You may now exit this window.**

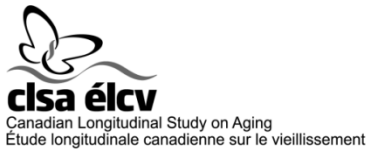

1  
2  
3  
4  
5 **Supplementary Appendix 3 – Informant Information Package**  
6  
7  
8

9 Family Member or Friend Information Package Cover Letter ..... 2  
10  
11 Family Member or Friend Study Information Package ..... **Error! Bookmark not defined.**  
12  
13  
14  
15  
16  
17  
18  
19  
20  
21  
22  
23  
24  
25  
26  
27  
28  
29  
30  
31  
32  
33  
34  
35  
36  
37  
38  
39  
40  
41  
42  
43  
44  
45  
46  
47  
48  
49  
50  
51  
52  
53  
54  
55  
56  
57  
58  
59  
60

For peer review only

## Family Member or Friend Information Package Cover Letter

Dear [Informant],

Your family member or friend, [participant name], is a participant in the Canadian Longitudinal Study on Aging (CLSA) and is taking part in the CLSA Memory Study. Participants in this study were asked to identify someone who could answer questions about their cognitive health, ability to complete daily tasks, and behaviour. [Participant name] selected you as this person.

The purpose of this CLSA Memory Study is to determine whether information that is collected through CLSA interviews can be used to correctly identify individuals who have memory problems and individuals without memory problems.

If you choose to take part, you will complete a 20-minute telephone interview at a time convenient to you.

This study of the CLSA is funded by the Public Health Agency of Canada (PHAC). The CLSA Memory Study is being led by Dr. Lauren Griffith, Dr. Andrew Costa, and Dr. Parminder Raina, all from McMaster University. Other researchers from universities across Canada are also involved.

[Attached to this email is/This package contains] the **Family Member or Friend Study Information Package** that will provide you with information to help you make an informed choice about if you would like to take part in this study.

Please read the **Family Member or Friend Study Information Package** carefully. We will call you in the next couple of weeks and you will have an opportunity to ask any questions you may have.

If you wish to contact us directly, please feel free to:

- Email at [info@clsa-elcv.ca](mailto:info@clsa-elcv.ca)
- Call our toll-free line at **1-866-999-8303**

Thank you,

## FAMILY MEMBER OR FRIEND STUDY INFORMATION PACKAGE

**Study Title:** Canadian Longitudinal Study on Aging (CLSA) Memory Study

### Principal Investigators:

Dr. Lauren Griffith, Department of Health Research Methods, Evidence, and Impact, McMaster University

Dr. Andrew Costa, Department of Health Research Methods, Evidence, and Impact, McMaster University

Dr. Parminder Raina, Department of Health Research Methods, Evidence, and Impact, McMaster University

### Co-Investigators:

#### Newfoundland and Labrador

Dr. Gerry Mugford – Memorial University

#### Nova Scotia

Dr. Susan Kirkland – Dalhousie University

#### Quebec

Dr. Benoît Cossette – Université de Sherbrooke

Dr. Christina Wolfson – McGill University

#### Ontario

Dr. Cynthia Balion – McMaster University

Dr. Aaron Jones – McMaster University

Dr. Alexandra Mayhew – McMaster University

Dr. Vanessa Taler – University of Ottawa

Dr. Mary Thompson – University of Waterloo

Dr. Changbao Wu – University of Waterloo

#### Manitoba

Dr. Verena Menec – University of Manitoba

#### Saskatchewan

Dr. Megan O'Connell – University of Saskatchewan

#### Alberta

Dr. David Hogan – University of Calgary

Dr. Eric Smith – University of Calgary

British Columbia

Dr. Scott Hofer – University of Victoria

Dr. Teresa Liu-Ambrose – University of British Columbia

Dr. Andrew Wister – Simon Fraser University

### Supported by:

The Public Health Agency of Canada

**Conflicts of interest:** There are no conflicts of interest to declare related to this study.

## What is the purpose of the CLSA Memory Study?

- The purpose of this research study is to determine whether information that is collected through CLSA interviews can be used to correctly identify individuals who have memory problems and individuals without memory problems.

## How many people will take part in the CLSA Memory Study?

- We will recruit approximately 600 participants from the 11 CLSA Data Collection Sites in Canada (Surrey, British Columbia; Victoria, British Columbia; Vancouver, British Columbia; Calgary, Alberta; Winnipeg, Manitoba; Hamilton, Ontario; Ottawa, Ontario; Montréal, Quebec; Sherbrooke, Quebec; Halifax, Nova Scotia; and St. John's, Newfoundland).
- This study will take approximately two years to complete and the results should be known in approximately three years.

## What will I be asked to do if I volunteer to be part of the CLSA Memory Study?

- **A staff member from your family member or friend's local CLSA Data Collection Site will contact you to discuss the CLSA Memory Study in the next couple of weeks.** You will have an opportunity to ask any questions that you may have. If you are interested in participating in the CLSA Memory Study, the CLSA staff member will ask for your consent to participate.
- **You will be asked to complete an interview over the phone with a staff member from the CLSA.** You will be asked questions about your family member or friend's medical history, habits, and ability to complete everyday tasks. The interview will take approximately 20 minutes and can either be completed during this phone call or will be scheduled at a time convenient for you. Your family member or friend does not need to be present for your interview.



- The information you provide will be reviewed by a study physician who will also complete a medical assessment with your family member or friend. The information from your interview and the medical assessment will allow the study physician to determine if there is a potential concern about your family member or friend's memory or if their memory appears normal.
- The study physician may contact you by phone if they have any follow-up questions about the information you provide.

### **How will the information I provide to the CLSA Memory Study be used?**

- The data you provide to the CLSA Memory Study will be used to develop a method of identifying CLSA participants who have memory problems and individuals without memory problems in the main CLSA study.
- If the results of this study are published, your identity will remain confidential. It is expected that the information collected during this study will be used for analyses and will be published and presented to the scientific community at meetings and in journals.

### **How will my information be managed and kept safe?**

- As with all studies that collect personal information, there is a remote possibility that third parties such as an insurance company or employer could access the information you have provided without permission of the CLSA. Many levels of safeguards have been put in place to reduce this risk.
- All identifiable information will be kept in a secure database with a unique study number at McMaster University and will only be used to contact you. The information that you provide for us, without your name or contact information, will be stored in a secure database at McMaster University. Data collected by interviewers are transferred to the McMaster database over secure, encrypted connections.
- All CLSA staff will sign an agreement to protect your privacy and confidentiality.

- The CLSA Memory Study data will not be available to other researchers through our general study data access processes. Any requests to access the CLSA Memory Study data will need to be submitted to and approved by the CLSA Memory Study principal investigators. Researchers using data from the CLSA Memory Study will not be provided with any identifying information.
- Records identifying you as a participant in the CLSA Memory Study will be kept confidential and, to the extent permitted by the applicable laws, will not be disclosed or made publicly available, except as described in this document. If required, direct authorized representatives of the following organizations may look at your original identifiable data to check that the information collected for the study is correct and follow proper laws and guidelines:
  - The research ethics boards who oversee the ethical conduct of this study at each institution
- If you would like more information about how the CLSA protects your data, please contact us by email at **info@clsa-elcv.ca** or telephone at **1-866-999-8303**.
- Every effort will be made to keep the information you provide private, but risk of accidental disclosure is possible.

### **What if I decide at some point that I no longer want to be part of the CLSA Memory Study?**

- Your agreement to participate in the CLSA Memory Study is entirely voluntary.
- If you decide to not take part in the CLSA Memory Study, there will be no penalty or loss of benefit to you
- Your decision to participate in the CLSA Memory Study does not affect your family member or friend's ongoing participation in the CLSA Memory Study, or the main CLSA study that they have participated in since 2011-2015.
- You can choose to end your participation in this research (called withdrawal) at any time without having to provide a reason. If you choose to withdraw from the study, you are encouraged to contact the research team.

- If you decide to leave the study, we will stop contacting you for the CLSA Memory Study. You may ask that the information that you provided not be used for the study. However, once the study results have been released, we will not be able to be remove it from our datasets. If you have any questions about the CLSA Memory Study, please contact us using the provided email address or telephone number.

By email

**info@clsa-elcv.ca**

By telephone

**1-866-999-8303**

### **Can participation in the CLSA Memory Study end early?**

- Your participation in the CLSA Memory Study may be stopped early, and without your consent, for reasons such as:
  - New information shows that the research is no longer in your best interest
  - The research team decides to stop the study
  - The research ethics board withdraws permission for the study to continue
  - Your family member or friend decides to withdraw from the CLSA Memory Study

### **Will I get any personal benefit from taking part in the CLSA Memory Study?**

- You will not get any direct personal benefit from taking part in the CLSA Memory Study.
- Your participation in the CLSA Memory Study will contribute to potentially developing new ways to identify individuals with memory problems, even if they have not been diagnosed by a physician.

## Are there any risks to taking part in the CLSA Memory Study?

- There are no direct medical risks associated with participation in this study.

## What are the rights of participants in a research study?

- You will be told in a timely manner about new information that may be relevant to your willingness to stay in this study.
- You have the right to be informed of the overall results of this research once the entire study is complete. Information about ongoing research, the research team, and general study results will be posted on the CLSA website ([www.clsa-elcv.ca](http://www.clsa-elcv.ca)) as well.
- Your rights to privacy are legally protected by federal and provincial laws that require safeguards to ensure that your privacy is respected.
- If you consent to participate in the CLSA Memory Study, you do not give up any of your legal rights against the research team, the Public Health Agency of Canada, or involved institutions for compensation, nor does this form relieve the research team, the Public Health Agency of Canada, or their agents of their legal and professional responsibilities.
- Each research ethics board has reviewed this study. The research ethics boards are responsible for ensuring that participants are informed of the risks associated with the research, and that participants are free to decide if participation is right for them. If you have any questions regarding your rights as a research participant, you may contact the Research Ethics Board associated with your Data Collection Site:

**Note: Please do not call the Ethics office for rescheduling or cancelling appointment. Please call the CLSA toll-free number (1-866-999-8303).**

## **BRITISH COLUMBIA**

### **BURNABY**

Office of Research Ethics  
Simon Fraser University  
8888 University Drive  
Multi-Tenant Facility  
Burnaby BC V5A 1S6  
Phone: (778) 782-6593  
E-mail: dore@sfu.ca

### **VICTORIA**

Human Research Ethics Office of Research  
Services  
University of Victoria  
Administrative Services Building (ASB), Room  
B202  
PO Box 1700 Stn CSC  
3800 Finnerty Road  
Victoria BC V8W 2Y2  
Phone: (250) 472-4545

### **VANCOUVER**

University of British Columbia  
Office of Research Services  
6190 Agronomy Road  
Vancouver BC V6T 1Z3  
Phone: toll free 1-877-822-8298  
Phone: local (604) 822-8598

Vancouver Island Health Authority  
Research Ethics and Compliance Office  
Queen Alexandra Centre, Main Building Room  
205  
2400 Arbutus Road  
Victoria BC V8N 1V7  
Phone: (250) 519-6726

---

## **ALBERTA**

### **CALGARY**

Conjoint Health Research Ethics Board  
University of Calgary  
Phone: (403) 220-7990

## **MANITOBA**

### **WINNIPEG**

Bannatyne Campus  
Research Ethics Board  
University of Manitoba  
P126 Pathology Building  
770 Bannatyne Avenue  
Winnipeg MB R3E 0W3  
Phone: (204) 789-3883

---

## **ONTARIO**

### **HAMILTON**

Office of the Chair  
Hamilton Integrated Research Ethics Board  
(HiREB)  
293 Wellington Street North  
Hamilton ON L8L 8E7  
Phone: (905) 521-2100 ext. 42013

### **OTTAWA**

Chair, Bruyère Research Ethics Board  
43 Bruyère Street  
Ottawa ON K1N 5C8  
Phone: (613) 562-6262 ext. 4003  
E-mail: REB@bruyere.org

**QUEBEC**

**MONTREAL**

Ms. Ilde Lepore  
Senior Ethics Administrator  
McGill Institutional Review Board  
McGill University Faculty of Medicine  
McIntyre Medical Building  
#633-3655 Promenade Sir William Osler  
Montreal QC H3G 1Y6  
Phone: (514) 398-8302  
E-mail: ilde.lepore@mcgill.ca

**SHERBROOKE**

CÉR du CIUSSS de l'Estrie-CHUS  
3001, 12e Avenue Nord,  
Sherbrooke, QC J1H 5N4  
819 346-1110, poste 12856  
ethique.recherche.ciusse-  
chus@ssss.gouv.qc.ca

**NOVA SCOTIA**

**HALIFAX**

Director  
Office of Research Ethics Administration  
Dalhousie University  
6299 South Street  
2nd Floor, Suite 231  
Halifax NS B3H 4H6  
Phone: (902)-494-1462

**NEWFOUNDLAND & LABRADOR**

**St. JOHN'S**

Memorial University  
Faculty of Medicine  
Health Research Ethics Authority  
2<sup>nd</sup> Floor, Bonaventure Place  
95 Bonaventure Avenue  
St. John's NL, A1B 2X5  
Phone: (709) 777-6974

CLSA Memory Study  
 Informant Consent Script Version 1.1  
 October 12, 2022

Page 1 of 4

**Supplementary Appendix 4 - Using the CLSA Platform to Validate Algorithms to Identify Participants with Dementia (Major Neurocognitive Disorder) and Mild Neurocognitive Disorder in the Canadian Longitudinal Study on Aging (CLSA Memory Study)**

**INFORMANT CONSENT SCRIPT**

Each section (e.g., INFINT, INFINFO, INFCON, and INFINT) represents a screen of the consent script.

**INTRODUCTION**

**INFINT1** Your family member or friend, [participant name], is a participant in the Canadian Longitudinal Study on Aging (CLSA) and is taking part in the CLSA Memory Study. Participants in this study were asked to identify someone who could answer questions about their cognitive health, ability to complete daily tasks, and behaviour. [Participant name] selected you as this person and would like you to complete a 20-minute telephone interview as part of their participation in the CLSA Memory Study.

Have you received a copy of the information package about this study?

Yes \_\_\_\_\_ **Continue**

No \_\_\_\_\_ **Go to INFINT4**

**INFINT2** Have you had a chance to read the information package?

Yes \_\_\_\_\_ **Continue**

No \_\_\_\_\_ **Go to INFINT6**

**INFINT3** After reading the CLSA Memory Study information package, are you interested in participating in the CLSA Memory Study by completing the telephone questionnaire about [participant name]?

Yes \_\_\_\_\_ **Go to INFINFO1**

No \_\_\_\_\_ **Go to REFUSAL**

**INFINT4** Would you like us to send you a copy of the information package by mail or by email?

Yes - by mail \_\_\_\_\_ **Continue**

Yes - by email \_\_\_\_\_ **Continue**

No \_\_\_\_\_ **REFUSAL**

**INFINT5** **[DO NOT READ: Please enter or verify the informant's mailing address and email address then arrange for the CLSA Memory Study informant information package to be sent by email or mail to the informant. Let the informant know you will call back in a few days if the information package was sent by email or a couple of weeks if the information package was sent by mail. Please hit "back" until you get to the first page of this script to the question asking if the informant has received the information package.]**

**END INTERVIEW**

1 CLSA Memory Study  
 2 Informant Consent Script Version 1.1  
 3 October 12, 2022

Page 2 of 4

4  
 5 **INFINT6** Would you like for us to call back in a few days when you have had a chance to read the information  
 6 package?  
 7

8 Yes \_\_\_\_\_ **Continue**

9  
 10 No \_\_\_\_\_ **Go to REFUSAL**  
 11  
 12  
 13

14 **INFINT7** **[DO NOT READ: Book a call back time for the informant to complete the informed consent**  
 15 **process. Please hit “back” until you get to the first page of the informant script asking if the**  
 16 **informant has received the information package.]**  
 17

18  
 19 Thank you for your interest in the CLSA Memory Study. We look forward to speaking with you again  
 20 soon to review the information package. **END INTERVIEW.**  
 21

---

22 **INFORMATION**

23  
 24 **INFINFO1** As a brief reminder, the purpose of this CLSA Memory Study is to determine whether information that is  
 25 collected through CLSA interviews can be used to correctly identify individuals who have memory  
 26 problems and individuals without memory problems.  
 27

28 If you choose to take part, you will complete a 20-minute telephone interview now or at a later date and  
 29 time convenient to you. This interview will involve answering questions asking about [participant name]'s  
 30 cognitive health, ability to complete daily tasks, and behaviour.  
 31

32 The CLSA Memory Study is being funded by the Public Health Agency of Canada (PHAC). The CLSA  
 33 Memory Study is being led by Dr. Lauren Griffith, Dr. Andrew Costa, and Dr. Parminder Raina, all from  
 34 McMaster University. Other researchers from universities across Canada are also involved.  
 35

36 **Continue**  
 37

38 **INFINFO2** Do you have any questions you would like to ask about the CLSA Memory Study?  
 39

40 **RESPOND TO ALL INFORMANT QUESTIONS BEFORE CONTINUING**  
 41

42  
 43 **INFINFO3** Would you like to complete the informed consent process?  
 44

45 Yes \_\_\_\_\_ **Continue**

46  
 47 No \_\_\_\_\_ **Go to Refusal**  
 48  
 49  
 50  
 51  
 52  
 53  
 54  
 55  
 56  
 57  
 58



---

**INFORMANT CONSENT**

**INFCON1** Thank you for your time reviewing this information. I will now read a list of statements. Please indicate you if agree or disagree with each statement.

**Continue**

**INFCON2** I have read the Family Member or Friend Study Information Package and I understand it.

Agree \_\_\_\_\_ **Continue**

Disagree \_\_\_\_\_ **Go to Refusal**

**INFCON3** I have had a chance to ask questions about the study, and all my questions have been answered.

Agree \_\_\_\_\_ **Continue**

Disagree \_\_\_\_\_ **Go to Refusal**

**INFCON4** I understand that as part of the study, I will be required to complete an interview over the phone answering a questionnaire about my family member or friend's cognitive health, ability to complete daily tasks, and behaviour.

Agree \_\_\_\_\_ **Continue**

Disagree \_\_\_\_\_ **Go to Refusal**

**INFCON5** I do not give up any of my legal rights by verbally consenting to participate in the CLSA Memory Study.

Agree \_\_\_\_\_ **Continue**

Disagree \_\_\_\_\_ **Go to Refusal**

**INFCON6** I understand that my information will be used for research purposes only and this research may also have commercial uses that benefit society.

Disagree \_\_\_\_\_ **Go to Refusal**

Agree \_\_\_\_\_ **Continue**

**INFCON7** I understand that I can withdraw my consent at any time. If I choose to withdraw consent, I will be offered options for how the information already collected about me will be used.

Disagree \_\_\_\_\_ **Go to Refusal**

Agree \_\_\_\_\_ **Continue**

1 CLSA Memory Study  
 2 Informant Consent Script Version 1.1  
 3 October 12, 2022

Page 4 of 4

4 **INFCON8** I will now read the consent statement and ask that you please respond with either 'yes' or 'no'. This will  
 5 act as your consent to participate in the CLSA Memory Study.

6  
 7 I agree to take part in the CLSA Memory Study.

8  
 9 Yes \_\_\_\_\_ **Go to INFCON9**

10  
 11 No \_\_\_\_\_ **Go to Refusal**

### 12 13 **CONSENTED TO PARTICIPATE**

#### 14 15 **IF PARTICIPANT ANSWERS YES TO STATEMENT INFCON8**

16  
 17 **INFCON9** Thank you for agreeing to participate in the CLSA Memory Study.

18  
 19  
 20 **INFCON10** The questionnaire about [participant name's] cognitive health, ability to complete daily tasks, and  
 21 behaviour is about 20 minutes long. Would you like to complete the questionnaire now or schedule an  
 22 appointment at an alternative date or time?

23  
 24 Complete interview now \_\_\_\_\_ **Go to INTERVIEW**

25  
 26 Schedule interview later \_\_\_\_\_ **Continue**

27  
 28 **INFCON11** **[DO NOT READ: Please use Sabretooth to schedule a time to call the informant for their interview.]**

29  
 30 Thank you for agreeing to participate in the CLSA Memory Study. We look forward to speaking with you  
 31 again soon to complete the questionnaire.

32  
 33 **CLICK SUBMIT AND END CALL**

### 34 35 **REFUSAL**

36  
 37 **IF ANSWER IS 'NO' TO INFINT3, INFINT6, INFINFO3, OR IF THE PARTICIPANT RESPONDS "NO" TO INFINT4 OR**  
 38 **INFCON8, OR DISAGREES WITH INFCON2, INFCON3, INFCON4, INFCON5, INFCON6, INCON7.**

39  
 40 Thank you for taking the time to learn about the CLSA Memory Study.

41  
 42 **[DO NOT READ: Please contact the participant to identify another informant and update Sabretooth. When you**  
 43 **contact the new informant, please hit "previous" to return to the "informant introduction" page.]**

44  
 45 **END CALL**

### 46 47 **INTERVIEW**

48  
 49 **DO NOT END CALL. CLICK SUBMIT AND CONTINUE TO INFORMANT INTERVIEW.**

### 50 51 **END CALL**

### 52 53 54 **CONCLUSION SCREEN**

55  
 56 **You have completed the CLSA Memory Study Informant Consent Script. You may now exit this window**

1  
2  
3  
4  
5  
6  
7  
8  
9  
10  
11  
12  
13  
14  
15  
16  
17  
18  
19  
20  
21  
22  
23  
24  
25  
26  
27  
28  
29  
30  
31  
32  
33  
34  
35  
36  
37  
38  
39  
40  
41  
42  
43  
44  
45  
46  
47  
48  
49  
50  
51  
52  
53  
54  
55  
56  
57  
58  
59  
60

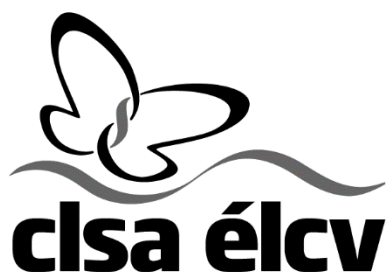

Canadian Longitudinal Study on Aging  
Étude longitudinale canadienne sur le vieillissement

**Supplementary Appendix 5**  
**- Medical Assessment**  
**(Canadian Longitudinal Study on**  
**Aging (CLSA) Memory Study)**

**v1.2, 2022 October 20<sup>th</sup>**

**Table of Contents**

1  
2  
3  
4  
5  
6  
7  
8 Sociodemographic Information (SDC) ..... 3  
9 Cognitive Status (COG) ..... 8  
10 Medical History (MED) ..... 11  
11 Basic Activities of Daily Living (ADL) ..... 19  
12 Instrumental Activities of Daily Living (IADL) ..... 22  
13 Transportation (TRA) ..... 27  
14 Mood and Behaviour (BHV) ..... 29  
15 Physical Examination (EXM) ..... 32  
16 Montreal Cognitive Assessment (MoCA) ..... 42  
17 Preliminary Diagnosis of Neurocognitive Disorder (NCD) ..... 57  
18  
19  
20  
21  
22  
23  
24  
25  
26  
27  
28  
29  
30  
31  
32  
33  
34  
35  
36  
37  
38  
39  
40  
41  
42  
43  
44  
45  
46  
47  
48  
49  
50  
51  
52  
53  
54  
55  
56  
57  
58

peer review only

## Sociodemographic Information (SDC)

|                 |                                                                                                                                                                                                                                                                                                                                                                                                                                                                                                 |
|-----------------|-------------------------------------------------------------------------------------------------------------------------------------------------------------------------------------------------------------------------------------------------------------------------------------------------------------------------------------------------------------------------------------------------------------------------------------------------------------------------------------------------|
| <b>Overview</b> | <p>These questions obtain basic sociodemographic information from the participant. They function as an interview icebreaker and, by comparison with the most recent response for each question from the main CLSA interviews when available, a check on their remote memory.</p> <p>Clinicians are expected to complete all items in this module. However, they have flexibility in determining the order in which the questions are asked and the specific wording used for each question.</p> |
|-----------------|-------------------------------------------------------------------------------------------------------------------------------------------------------------------------------------------------------------------------------------------------------------------------------------------------------------------------------------------------------------------------------------------------------------------------------------------------------------------------------------------------|

|                                                                                                                        |                                                                |
|------------------------------------------------------------------------------------------------------------------------|----------------------------------------------------------------|
| <b>SDC_1</b>                                                                                                           | <b>SDC_AGEBL_MSP</b>                                           |
| Participant's age in years – <u>based on date of birth provided at CLSA Baseline</u>                                   |                                                                |
| CLINICIAN NOTE: If there is no response shown for this item, the participant did not answer this question at baseline. |                                                                |
| NUMBER                                                                                                                 | [CALCULATED BY PINE USING<br>BASELINE CLSA DATA – AGE_DOB_COM] |

|                                                              |                                               |
|--------------------------------------------------------------|-----------------------------------------------|
| <b>SDC_2</b>                                                 | <b>SDC_AGE_MSP</b>                            |
| <b>[ALWAYS ASK]</b>                                          |                                               |
| What is the participant's <b>self-reported</b> age in years? |                                               |
| NB_SP                                                        | Age _____ <b>[MASK: MIN=53, MAX=94]</b>       |
| DK_NA                                                        | 8 <b>[DO NOT READ]</b> Don't know / No answer |
| REFUSED                                                      | 9 <b>[DO NOT READ]</b> Refused                |

|                                                                                                                        |                                                                                                  |
|------------------------------------------------------------------------------------------------------------------------|--------------------------------------------------------------------------------------------------|
| <b>SDC_3</b>                                                                                                           | <b>SDC_SEXBL_MSP</b>                                                                             |
| Participant's sex – <u>self-reported at CLSA baseline</u>                                                              |                                                                                                  |
| CLINICIAN NOTE: If there is no response shown for this item, the participant did not answer this question at baseline. |                                                                                                  |
| GENDER                                                                                                                 | [IMPUTED BY PINE USING BASELINE<br>CLSA DATA – SEX_ASK_COM. IF EMPTY, ANSWER 'DATA UNAVAILABLE'] |

|                                                                 |                       |                                             |
|-----------------------------------------------------------------|-----------------------|---------------------------------------------|
| <b>SDC_4</b>                                                    | <b>SDC_GENDER_MSP</b> |                                             |
| <b>[ALWAYS ASK]</b>                                             |                       |                                             |
| What is the participant's <b>self-reported</b> gender identity? |                       |                                             |
| <b>CODE ONLY ONE RESPONSE</b>                                   |                       |                                             |
| MALE                                                            | 1                     | Male                                        |
| FEMALE                                                          | 2                     | Female                                      |
| TRANSMAN                                                        | 3                     | Transgender Man/Transman                    |
| TRANSWOMAN                                                      | 4                     | Transgender Women/Transwoman                |
| GENDERQUEER                                                     | 5                     | Genderqueer                                 |
| OTSP                                                            | 7                     | Other (please specify: _____)               |
| DK_NA                                                           | 8                     | <b>[DO NOT READ]</b> Don't know / No answer |
| REFUSED                                                         | 9                     | <b>[DO NOT READ]</b> Refused                |

|                                                                                                                        |                                                                                                                                                                                                                                                                                                                                                                                                                                                                                                                                                                                                                                                                                                                                                                                                                                                                                                                                                                                                        |  |
|------------------------------------------------------------------------------------------------------------------------|--------------------------------------------------------------------------------------------------------------------------------------------------------------------------------------------------------------------------------------------------------------------------------------------------------------------------------------------------------------------------------------------------------------------------------------------------------------------------------------------------------------------------------------------------------------------------------------------------------------------------------------------------------------------------------------------------------------------------------------------------------------------------------------------------------------------------------------------------------------------------------------------------------------------------------------------------------------------------------------------------------|--|
| <b>SDC_5</b>                                                                                                           | <b>SDC_EDU4BL_MSP</b>                                                                                                                                                                                                                                                                                                                                                                                                                                                                                                                                                                                                                                                                                                                                                                                                                                                                                                                                                                                  |  |
| <b>[ALWAYS ASK]</b>                                                                                                    |                                                                                                                                                                                                                                                                                                                                                                                                                                                                                                                                                                                                                                                                                                                                                                                                                                                                                                                                                                                                        |  |
| Participant's education – <u>self-reported at CLSA Baseline</u>                                                        |                                                                                                                                                                                                                                                                                                                                                                                                                                                                                                                                                                                                                                                                                                                                                                                                                                                                                                                                                                                                        |  |
| CLINICIAN NOTE: If there is no response shown for this item, the participant did not answer this question at baseline. |                                                                                                                                                                                                                                                                                                                                                                                                                                                                                                                                                                                                                                                                                                                                                                                                                                                                                                                                                                                                        |  |
| EDU4                                                                                                                   | <p style="text-align: right;">[IMPUTED BY PINE USING BASELINE CLSA DATA]</p> <p><b>1 = Less than secondary school graduation</b> – code if:<br/>                 ED_ELHS_COM = (1, 2, 3) and<br/>                 ED_HSGR_COM = 2 and<br/>                 ED_OTED_COM = 2</p> <p><b>2 = Secondary school graduation, no post-secondary secondary education</b> – code if:<br/>                 ED_HSGR_COM = 1 and<br/>                 ED_OTED_COM = 2</p> <p><b>3 = Some post-secondary education</b> – code if:<br/>                 ED_HIGH_COM = 01</p> <p><b>4 = Post-secondary degree/diploma</b> – code if:<br/>                 02 ≤ ED_HIGH_COM ≤ 06 or<br/>                 ED_HIGH_COM = 97</p> <p><b>9 = At least one required question as not answered</b> – code if:<br/>                 ED_ELHS_COM = (8,9, EMPTY) or<br/>                 ED_HSGR_COM = (8,9, EMPTY) or<br/>                 ED_OTED_COM = (7,8,9, EMPTY) or<br/>                 ED_HIGH_COM = (98,99, EMPTY)]</p> |  |

1  
2  
3  
4  
5  
6  
7  
8  
9  
10  
11  
12  
13  
14  
15  
16  
17  
18  
19  
20  
21  
22  
23  
24  
25  
26

|                                                                            |                    |                                                          |
|----------------------------------------------------------------------------|--------------------|----------------------------------------------------------|
| <b>SDC_6</b>                                                               | <b>SDC_EDU_MSP</b> |                                                          |
| <b>[ALWAYS ASK]</b>                                                        |                    |                                                          |
| What is the participant's <b>self-reported</b> highest level of education? |                    |                                                          |
| <b>CODE ONLY ONE RESPONSE</b>                                              |                    |                                                          |
| LESS_SEC                                                                   | 1                  | Less than secondary school graduation                    |
| SEC                                                                        | 2                  | Secondary school graduation, no post-secondary education |
| SOME_POST                                                                  | 3                  | Some post-secondary education                            |
| POST_SEC                                                                   | 4                  | Post-secondary degree/diploma                            |
| DK_NA                                                                      | 8                  | <b>[DO NOT READ]</b> Don't know / No answer              |
| REFUSED                                                                    | 9                  | <b>[DO NOT READ]</b> Refused                             |

27  
28  
29  
30  
31  
32  
33  
34  
35  
36  
37  
38  
39  
40  
41  
42  
43  
44  
45  
46  
47  
48  
49  
50  
51  
52  
53  
54  
55  
56  
57  
58  
59  
60

|                                                                   |                    |                                             |
|-------------------------------------------------------------------|--------------------|---------------------------------------------|
| <b>SDC_7</b>                                                      | <b>SDC_LBF_MSP</b> |                                             |
| <b>[ALWAYS ASK]</b>                                               |                    |                                             |
| What is the participant's <b>self-reported</b> employment status? |                    |                                             |
| <b>CODE ONLY ONE RESPONSE</b>                                     |                    |                                             |
| COM_RET                                                           | 1                  | Completely retired                          |
| PAR_RET                                                           | 2                  | Partly retired                              |
| NOT_RET_WORK                                                      | 3                  | Not retired and currently working           |
| NOT_RET_NO_WORK                                                   | 4                  | Not retired and not currently working       |
| NEVER_WORKED                                                      | 5                  | Never held a paid job                       |
| DK_NA                                                             | 8                  | <b>[DO NOT READ]</b> Don't know / No answer |
| REFUSED                                                           | 9                  | <b>[DO NOT READ]</b> Refused                |

1  
2  
3  
4  
5  
6  
7  
8  
9  
10  
11  
12  
13  
14  
15  
16  
17  
18  
19  
20  
21  
22  
23  
24  
25  
26  
27  
28  
29  
30  
31  
32  
33  
34  
35  
36  
37  
38  
39  
40  
41  
42  
43  
44  
45  
46  
47  
48  
49  
50  
51  
52  
53  
54  
55  
56  
57  
58  
59  
60

|                                                                                                                                                                        |                                                                                                                                                                                                                                                                                                                                                                                                                                                                                                                                                                                                                                                                                                                                                                                                                 |
|------------------------------------------------------------------------------------------------------------------------------------------------------------------------|-----------------------------------------------------------------------------------------------------------------------------------------------------------------------------------------------------------------------------------------------------------------------------------------------------------------------------------------------------------------------------------------------------------------------------------------------------------------------------------------------------------------------------------------------------------------------------------------------------------------------------------------------------------------------------------------------------------------------------------------------------------------------------------------------------------------|
| SDC_8                                                                                                                                                                  | SDC_OCCBL_MSP                                                                                                                                                                                                                                                                                                                                                                                                                                                                                                                                                                                                                                                                                                                                                                                                   |
| <b>[ASK IF SDC_LBF_MSP ≠ NEVER_WORKED]</b>                                                                                                                             |                                                                                                                                                                                                                                                                                                                                                                                                                                                                                                                                                                                                                                                                                                                                                                                                                 |
| Type of job participant did for the longest period of time – <u>self-reported at CLSA Baseline</u>                                                                     |                                                                                                                                                                                                                                                                                                                                                                                                                                                                                                                                                                                                                                                                                                                                                                                                                 |
| <b>CLINICIAN NOTE:</b> Please note that this is not the “main occupation” of the participant. Rather it is the job at which the participant had worked at the longest. |                                                                                                                                                                                                                                                                                                                                                                                                                                                                                                                                                                                                                                                                                                                                                                                                                 |
| If there is no response shown for this item, the participant did not answer this question at baseline.                                                                 |                                                                                                                                                                                                                                                                                                                                                                                                                                                                                                                                                                                                                                                                                                                                                                                                                 |
| OCC_TYPE                                                                                                                                                               | <p style="text-align: right;">[IMPUTED BY PINE USING BASELINE]</p> <p>CLSA DATA</p> <p><b>Never worked</b> – code if:<br/>LBF_EVER_COM = “NO”</p> <p><b>[open text for LFP_TYPE_SP_COM]</b> – code if:<br/>(RET_RTRD_COM = 1 or<br/>RET_RTRD_COM = 2) and<br/>LFP_LNGST_COM = 1</p> <p><b>[open text for LFP_LGTYPE_SP_COM]</b> – code if:<br/>(RET_RTRD_COM = 1 or<br/>RET_RTRD_COM = 2) and<br/>LFP_LNGST_COM = 2</p> <p><b>[open text for LBF_TYPE_NB_COM]</b> – code if:<br/>RET_RTRD_COM = 3 and<br/>LBF_LGEVER_COM = 2</p> <p><b>[open text for LBF_LGTYPE_SP_COM]</b> – code if:<br/>RET_RTRD_COM = 3 and<br/>LBF_LGEVER_COM = 1</p> <p><b>Data unavailable</b> – code if:<br/>ALL required questions do not fit into categories above, or ALL are DK_NA<br/>or REFUSED or not answered/missing data</p> |

|                                                                                  |             |
|----------------------------------------------------------------------------------|-------------|
| SDC_9                                                                            | SDC_OCC_MSP |
| <b>[ASK IF SDC_LBF_MSP = COM_RET, PAR_RET, NOT_RET_WORK, or NOT_RET_NO_WORK]</b> |             |
| What is the participant’s <b>self-reported</b> primary occupation?               |             |



**CLINICIAN NOTE:** Provide a brief description of the occupation. Please note, this question refers to the primary occupation of the participant while the previous question from the main CLSA interview refers to the occupation that the participant did for the longest period of time.

|         |            |                                             |
|---------|------------|---------------------------------------------|
| OCC_SP  | Occupation | _____                                       |
| DK_NA   | 8          | <b>[DO NOT READ]</b> Don't know / No answer |
| REFUSED | 9          | <b>[DO NOT READ]</b> Refused                |

|                                                                                                                                                                                                                          |                      |     |
|--------------------------------------------------------------------------------------------------------------------------------------------------------------------------------------------------------------------------|----------------------|-----|
| <b>SDC_10</b>                                                                                                                                                                                                            | <b>SDC_NOTES_MSP</b> |     |
| <b>[ALWAYS ASK]</b>                                                                                                                                                                                                      |                      |     |
| Do you have any additional notes to include for this module? For example, are there any other sociodemographic characteristics that should be taken into account when interpreting the results of the cognitive testing? |                      |     |
| YES                                                                                                                                                                                                                      | 1                    | Yes |
| NO                                                                                                                                                                                                                       | 2                    | No  |

|                                                                                                                                     |                        |  |
|-------------------------------------------------------------------------------------------------------------------------------------|------------------------|--|
| <b>SDC_11</b>                                                                                                                       | <b>SDC_NOTESSP_MSP</b> |  |
| <b>[ASK IF SDC_NOTES_MSP = YES]</b>                                                                                                 |                        |  |
| <b>CLINICIAN NOTE:</b> Please do not enter any identifying information in this section.                                             |                        |  |
| Please provide any relevant notes (e.g., how congruent the participant's responses were to previously collected information) below: |                        |  |

**SDC\_END**

## Cognitive Status (COG)

|                 |                                                                                                                                                                                                                                                                                                                                                                                                                                                                                                   |
|-----------------|---------------------------------------------------------------------------------------------------------------------------------------------------------------------------------------------------------------------------------------------------------------------------------------------------------------------------------------------------------------------------------------------------------------------------------------------------------------------------------------------------|
| <b>Overview</b> | <p>The purpose of this section is to assess if the participant has experienced cognitive decline. Participants that report the presence of cognitive decline will be asked to provide details regarding the onset, progression, and symptoms related to the cognitive decline.</p> <p>Clinicians are expected to complete all items in this module. However, they have flexibility in determining the order in which the questions are asked and the specific wording used for each question.</p> |
|-----------------|---------------------------------------------------------------------------------------------------------------------------------------------------------------------------------------------------------------------------------------------------------------------------------------------------------------------------------------------------------------------------------------------------------------------------------------------------------------------------------------------------|

|                                                                                   |                    |                                             |
|-----------------------------------------------------------------------------------|--------------------|---------------------------------------------|
| <b>COG_1</b>                                                                      | <b>COG_DEC_MSP</b> |                                             |
| <b>[ALWAYS ASK]</b>                                                               |                    |                                             |
| Has the participant reported experiencing cognitive decline?                      |                    |                                             |
| <b>CLINICIAN NOTE:</b> This question should be asked directly to the participant. |                    |                                             |
| YES                                                                               | 1                  | Yes                                         |
| NO                                                                                | 2                  | No                                          |
| DK_NA                                                                             | 8                  | <b>[DO NOT READ]</b> Don't know / No answer |
| REFUSED                                                                           | 9                  | <b>[DO NOT READ]</b> Refused                |

|                                                                                                                       |                    |                                                 |
|-----------------------------------------------------------------------------------------------------------------------|--------------------|-------------------------------------------------|
| <b>COG_2</b>                                                                                                          | <b>COG_YRS_MSP</b> |                                                 |
| <b>[ASK IF COG_DEC_MSP = YES]</b>                                                                                     |                    |                                                 |
| How many years has the participant reported experiencing cognitive decline?                                           |                    |                                                 |
| <b>CLINICIAN NOTE:</b> This question should be asked directly to the participant. Please provide the number of years. |                    |                                                 |
| LESS_YR                                                                                                               | 001                | Less than one year                              |
| YEARS                                                                                                                 | Years              | ___ <b>[MASK: MIN=1, MAX=PARTICIPANT'S AGE]</b> |
| DK_NA                                                                                                                 | 998                | <b>[DO NOT READ]</b> Don't know / No answer     |
| REFUSED                                                                                                               | 999                | <b>[DO NOT READ]</b> Refused                    |

|              |                    |
|--------------|--------------------|
| <b>COG_3</b> | <b>COG_SEV_MSP</b> |
|--------------|--------------------|

|                                                                                   |   |                                                                          |
|-----------------------------------------------------------------------------------|---|--------------------------------------------------------------------------|
| <b>[ASK IF COG_DEC_MSP = YES]</b>                                                 |   |                                                                          |
| The participant describes the severity of their cognitive decline as...           |   |                                                                          |
| <b>CODE ONLY ONE RESPONSE</b>                                                     |   |                                                                          |
| <b>CLINICIAN NOTE:</b> This question should be asked directly to the participant. |   |                                                                          |
| IRRT                                                                              | 1 | Present and may be an irritant but not a concern of theirs               |
| WORR                                                                              | 2 | Worrisome but not having overt impact on daily life                      |
| IMPT                                                                              | 3 | Having an impact on their life (e.g., occupation, autonomy/independence) |
| DK_NA                                                                             | 8 | <b>[DO NOT READ]</b> Don't know / No answer                              |
| REFUSED                                                                           | 9 | <b>[DO NOT READ]</b> Refused                                             |

|                                                                      |                    |                                             |
|----------------------------------------------------------------------|--------------------|---------------------------------------------|
| <b>COG_4</b>                                                         | <b>COG_ONS_MSP</b> |                                             |
| <b>[ASK IF COG_DEC_MSP = YES]</b>                                    |                    |                                             |
| The participant believes the onset of their cognitive decline was... |                    |                                             |
| <b>CODE ONLY ONE RESPONSE</b>                                        |                    |                                             |
| GRAD                                                                 | 1                  | Gradual                                     |
| ABRT                                                                 | 2                  | Abrupt                                      |
| DK_NA                                                                | 8                  | <b>[DO NOT READ]</b> Don't know / No answer |
| REFUSED                                                              | 9                  | <b>[DO NOT READ]</b> Refused                |

|                                                                                          |                    |                                             |
|------------------------------------------------------------------------------------------|--------------------|---------------------------------------------|
| <b>COG_5</b>                                                                             | <b>COG_VAS_MSP</b> |                                             |
| <b>[ASK IF COG_ONS_MSP = ABRT]</b>                                                       |                    |                                             |
| The participant believes their cognitive decline was related to a cerebrovascular event. |                    |                                             |
| YES                                                                                      | 1                  | Yes                                         |
| NO                                                                                       | 2                  | No                                          |
| DK_NA                                                                                    | 8                  | <b>[DO NOT READ]</b> Don't know / No answer |
| REFUSED                                                                                  | 9                  | <b>[DO NOT READ]</b> Refused                |

|                                   |                    |  |
|-----------------------------------|--------------------|--|
| <b>COG_6</b>                      | <b>COG_PRO_MSP</b> |  |
| <b>[ASK IF COG_DEC_MSP = YES]</b> |                    |  |

1  
2  
3  
4  
5  
6  
7  
8  
9  
10  
11  
12  
13  
14  
15

|                                                                              |   |                                        |
|------------------------------------------------------------------------------|---|----------------------------------------|
| The participant believes the trajectory of their cognitive impairment was... |   |                                        |
| <b>CODE ONLY ONE RESPONSE</b>                                                |   |                                        |
| NONE                                                                         | 1 | Improvement/none-stability after onset |
| GRAD                                                                         | 2 | Gradual or insidious progression       |
| STEP                                                                         | 3 | Stepwise progression                   |
| FLUC                                                                         | 4 | Fluctuating                            |
| DK_NA                                                                        | 8 | [DO NOT READ] Don't know / No answer   |
| REFUSED                                                                      | 9 | [DO NOT READ] Refused                  |

16  
17  
18  
19  
20  
21  
22  
23  
24  
25  
26

|                                                                                                                                                                                                   |                      |     |
|---------------------------------------------------------------------------------------------------------------------------------------------------------------------------------------------------|----------------------|-----|
| <b>COG_7</b>                                                                                                                                                                                      | <b>COG_NOTES_MSP</b> |     |
| <b>[ALWAYS ASK]</b>                                                                                                                                                                               |                      |     |
| Do you have any additional notes to include for this module (e.g., whether you concur with the participant's perceptions of presence, severity, onset, and progression of any cognitive decline)? |                      |     |
| YES                                                                                                                                                                                               | 1                    | Yes |
| NO                                                                                                                                                                                                | 2                    | No  |

27  
28  
29  
30  
31  
32  
33  
34  
35

|                                                                                         |                        |  |
|-----------------------------------------------------------------------------------------|------------------------|--|
| <b>COG_8</b>                                                                            | <b>COG_NOTESSP_MSP</b> |  |
| <b>[ASK IF COG_NOTES_MSP = YES]</b>                                                     |                        |  |
| <b>CLINICIAN NOTE:</b> Please do not enter any identifying information in this section. |                        |  |
| Please provide any notes below:                                                         |                        |  |

36  
37  
38  
39  
40  
41  
42  
43  
44  
45  
46  
47  
48  
49  
50  
51  
52  
53  
54  
55  
56  
57  
58

**COG\_END**

## Medical History (MED)

---

|                 |                                                                                                                                                                                                                                                                                                                                                                                                                                                                                                                                                                                                           |
|-----------------|-----------------------------------------------------------------------------------------------------------------------------------------------------------------------------------------------------------------------------------------------------------------------------------------------------------------------------------------------------------------------------------------------------------------------------------------------------------------------------------------------------------------------------------------------------------------------------------------------------------|
| <b>Overview</b> | <p>The medical history module captures information that will assist the examining physician in determining if any observed cognitive limitations are secondary to medical conditions such as neurodegenerative diseases. This information may also increase the confidence in the physician's diagnosis based on the absence or presence of risk factors for neurocognitive disorders.</p> <p>Clinicians are expected to complete all items in this module. However, they have flexibility in determining the order in which the questions are asked and the specific wording used for each question.</p> |
|-----------------|-----------------------------------------------------------------------------------------------------------------------------------------------------------------------------------------------------------------------------------------------------------------------------------------------------------------------------------------------------------------------------------------------------------------------------------------------------------------------------------------------------------------------------------------------------------------------------------------------------------|

| MED_1                                                                                        | MED_CON_MSP |                                                                                                     |
|----------------------------------------------------------------------------------------------|-------------|-----------------------------------------------------------------------------------------------------|
| <b>[ALWAYS ASK]</b>                                                                          |             |                                                                                                     |
| Does the participant have any of the following medical conditions?                           |             |                                                                                                     |
| <b>MULTIPLE RESPONSES ALLOWED (EXCEPT IF 96, 98 OR 99 ARE SELECTED), CODE ALL THAT APPLY</b> |             |                                                                                                     |
| CAD                                                                                          | 1           | Coronary artery disease                                                                             |
| HF                                                                                           | 2           | Heart failure                                                                                       |
| AF                                                                                           | 3           | Atrial fibrillation/flutter                                                                         |
| TIA                                                                                          | 4           | Transient ischemic attack (TIA)                                                                     |
| STR                                                                                          | 5           | Cerebrovascular accident (stroke)                                                                   |
| HEM                                                                                          | 6           | Intracerebral hemorrhage                                                                            |
| HYP                                                                                          | 7           | Hypertension                                                                                        |
| DIA                                                                                          | 8           | Diabetes mellitus                                                                                   |
| DYS                                                                                          | 9           | Dyslipidemia                                                                                        |
| PKD                                                                                          | 10          | Parkinson's Disease or Parkinsonism                                                                 |
| DEP                                                                                          | 11          | Depression                                                                                          |
| ANX                                                                                          | 12          | Anxiety disorder                                                                                    |
| PSY                                                                                          | 13          | Psychotic illness                                                                                   |
| HR                                                                                           | 14          | Hearing impairment                                                                                  |
| VS                                                                                           | 15          | Visual impairment                                                                                   |
| SM                                                                                           | 16          | Impaired sense of smell                                                                             |
| DEM                                                                                          | 17          | Dementia                                                                                            |
| DELI                                                                                         | 18          | Suspected delirium (in the past 5 years)                                                            |
| IN                                                                                           | 19          | Insomnia                                                                                            |
| REM                                                                                          | 20          | REM-Sleep Behaviour Disorder                                                                        |
| OSA                                                                                          | 21          | Obstructive Sleep Apnea                                                                             |
| HYPT                                                                                         | 22          | Hypothyroidism                                                                                      |
| B12                                                                                          | 23          | Vitamin B12 deficiency                                                                              |
| OTSP                                                                                         | 24          | Other conditions relevant to cognitive status (e.g. cancer and/or cancer treatments); specify _____ |
| NONE                                                                                         | 96          | None of the above                                                                                   |
| DK_NA                                                                                        | 98          | <b>[DO NOT READ]</b> Don't know / No answer                                                         |
| REFUSED                                                                                      | 99          | <b>[DO NOT READ]</b> Refused                                                                        |

|                                                                         |                    |                                             |
|-------------------------------------------------------------------------|--------------------|---------------------------------------------|
| <b>MED_2</b>                                                            | <b>MED_TBI_MSP</b> |                                             |
| <b>[ALWAYS ASK]</b>                                                     |                    |                                             |
| Has the participant suffered a head injury or a concussion in the past? |                    |                                             |
| YES                                                                     | 1                  | Yes                                         |
| NO                                                                      | 2                  | No                                          |
| DK_NA                                                                   | 8                  | <b>[DO NOT READ]</b> Don't know / No answer |
| REFUSED                                                                 | 9                  | <b>[DO NOT READ]</b> Refused                |

|                                                                                                             |                     |                                             |
|-------------------------------------------------------------------------------------------------------------|---------------------|---------------------------------------------|
| <b>MED_3</b>                                                                                                | <b>MED_TBI1_MSP</b> |                                             |
| <b>[ASK IF MED_TBI_MSP = YES]</b>                                                                           |                     |                                             |
| How many head injuries or concussions has the participant had in his/her lifetime?                          |                     |                                             |
| <b>CLINICIAN NOTES:</b> If the informant cannot remember exact number, please probe for their best estimate |                     |                                             |
| TBI_NUM                                                                                                     | Number              | _____ <b>[MASK: MIN=1]</b>                  |
| DK_NA                                                                                                       | 8                   | <b>[DO NOT READ]</b> Don't know / No answer |
| REFUSED                                                                                                     | 9                   | <b>[DO NOT READ]</b> Refused                |

|                                                                                                                                                      |                     |                                                       |
|------------------------------------------------------------------------------------------------------------------------------------------------------|---------------------|-------------------------------------------------------|
| <b>MED_4</b>                                                                                                                                         | <b>MED_TBI2_MSP</b> |                                                       |
| <b>[ASK IF MED_TBI_MSP = YES]</b>                                                                                                                    |                     |                                                       |
| At what age or in what year did the participant have the most serious head injury?                                                                   |                     |                                                       |
| <b>CLINICIAN NOTES:</b> If the informant cannot remember the specific year, please probe for their best estimation of when the head injury occurred. |                     |                                                       |
| YR_SP                                                                                                                                                | Year                | _____ <b>[MASK: MIN=BIRTH YEAR, MAX=CURRENT YEAR]</b> |
| NB_SP                                                                                                                                                | Age                 | _____ <b>[MASK: MIN=1, MAX=CURRENT AGE]</b>           |
| DK_NA                                                                                                                                                | 998                 | <b>[DO NOT READ]</b> Don't know / No answer           |
| REFUSED                                                                                                                                              | 999                 | <b>[DO NOT READ]</b> Refused                          |

|                                                                                                      |              |                                                |
|------------------------------------------------------------------------------------------------------|--------------|------------------------------------------------|
| MED_5                                                                                                | MED_TBI3_MSP |                                                |
| <b>[ASK IF MED_TBI3_MSP = YES]</b>                                                                   |              |                                                |
| Did the most serious head injury result in...?                                                       |              |                                                |
| <b>READ LIST, MULTIPLE RESPONSES ALLOWED (EXCEPT IF 6, 8 OR 9 ARE SELECTED), CODE ALL THAT APPLY</b> |              |                                                |
| DZ                                                                                                   | 1            | Being dazed, confused, or "seeing stars"       |
| DRM                                                                                                  | 2            | Not remembering the injury                     |
| KO                                                                                                   | 3            | Losing consciousness (knocked out)             |
| NONE                                                                                                 | 6            | Head injury did not result in any of the above |
| DK_NA                                                                                                | 8            | <b>[DO NOT READ]</b> Don't know / No answer    |
| REFUSED                                                                                              | 9            | <b>[DO NOT READ]</b> Refused                   |

|                                          |              |                                             |
|------------------------------------------|--------------|---------------------------------------------|
| MED_6                                    | MED_TBI4_MSP |                                             |
| <b>[ASK IF MED_TBI3_MSP = KO]</b>        |              |                                             |
| How long did you lose consciousness for? |              |                                             |
| <b>READ LIST, CODE ONLY ONE RESPONSE</b> |              |                                             |
| KO1                                      | 1            | Less than a minute                          |
| KO20                                     | 2            | 1-20 minutes                                |
| KO20MORE                                 | 3            | Longer than 20 minutes                      |
| DK_NA                                    | 8            | <b>[DO NOT READ]</b> Don't know / No answer |
| REFUSED                                  | 9            | <b>[DO NOT READ]</b> Refused                |



|                                                                                                                                                                                                                                                                                                                                                                                                                                                                                                                                                                                                                                                                                                                                                                                                                                                                                                                                                                                                                                                                                                                                                                                                                                                                                                                                                                              |              |                                                                                                         |
|------------------------------------------------------------------------------------------------------------------------------------------------------------------------------------------------------------------------------------------------------------------------------------------------------------------------------------------------------------------------------------------------------------------------------------------------------------------------------------------------------------------------------------------------------------------------------------------------------------------------------------------------------------------------------------------------------------------------------------------------------------------------------------------------------------------------------------------------------------------------------------------------------------------------------------------------------------------------------------------------------------------------------------------------------------------------------------------------------------------------------------------------------------------------------------------------------------------------------------------------------------------------------------------------------------------------------------------------------------------------------|--------------|---------------------------------------------------------------------------------------------------------|
| MED_7                                                                                                                                                                                                                                                                                                                                                                                                                                                                                                                                                                                                                                                                                                                                                                                                                                                                                                                                                                                                                                                                                                                                                                                                                                                                                                                                                                        | MED_MED2_MSP |                                                                                                         |
| <b>[ALWAYS ASK]</b>                                                                                                                                                                                                                                                                                                                                                                                                                                                                                                                                                                                                                                                                                                                                                                                                                                                                                                                                                                                                                                                                                                                                                                                                                                                                                                                                                          |              |                                                                                                         |
| Which of the following medications is the participant currently taking?                                                                                                                                                                                                                                                                                                                                                                                                                                                                                                                                                                                                                                                                                                                                                                                                                                                                                                                                                                                                                                                                                                                                                                                                                                                                                                      |              |                                                                                                         |
| <b>MULTIPLE RESPONSES ALLOWED (EXCEP IF 96, 98 OR 99 ARE SELECTED), CODE ALL THAT APPLY</b>                                                                                                                                                                                                                                                                                                                                                                                                                                                                                                                                                                                                                                                                                                                                                                                                                                                                                                                                                                                                                                                                                                                                                                                                                                                                                  |              |                                                                                                         |
| <p><b>CLINICIAN NOTES:</b> If the participant does not bring in a list of medications or the medications themselves for review, please select option “Don’t know / No answer”. If you feel that the medication is an essential data element, you can ask if you can call the participant after the assessment when they are home and have access to their medications. Alternatively, you may also ask the participant if he/she would like you to contact the informant about which medications are being used.</p> <p>To determine if a medication has moderate to high anticholinergic activity, please refer to: <a href="https://www.rxfiles.ca/rxfiles/uploads/documents/Psyc-anticholinergic-Ref%20List%20SPDP-complete.pdf">https://www.rxfiles.ca/rxfiles/uploads/documents/Psyc-anticholinergic-Ref%20List%20SPDP-complete.pdf</a></p> <p>If the participant is taking a medication with moderate/high anticholinergic activity that also falls under another listed category, please select both options. For example, if a participant is taking desipramine for the treatment of depression, select the options “anti-depressants” and “drugs with moderate/high anticholinergic activity”.</p> <p>If the participant is not taking a medication regularly but rather as required, please include details in the “Notes” section at the end of this module.</p> |              |                                                                                                         |
| DEP                                                                                                                                                                                                                                                                                                                                                                                                                                                                                                                                                                                                                                                                                                                                                                                                                                                                                                                                                                                                                                                                                                                                                                                                                                                                                                                                                                          | 01           | Anti-depressants (whether used for depression, anxiety or other reason)                                 |
| PSY                                                                                                                                                                                                                                                                                                                                                                                                                                                                                                                                                                                                                                                                                                                                                                                                                                                                                                                                                                                                                                                                                                                                                                                                                                                                                                                                                                          | 02           | Anti-psychotics                                                                                         |
| SED                                                                                                                                                                                                                                                                                                                                                                                                                                                                                                                                                                                                                                                                                                                                                                                                                                                                                                                                                                                                                                                                                                                                                                                                                                                                                                                                                                          | 03           | Hypnotics and sedatives (whether used for insomnia, anxiety or other reason)                            |
| CHL                                                                                                                                                                                                                                                                                                                                                                                                                                                                                                                                                                                                                                                                                                                                                                                                                                                                                                                                                                                                                                                                                                                                                                                                                                                                                                                                                                          | 04           | Drugs with moderate/high anticholinergic activity including prescribed and over the counter medications |
| CON                                                                                                                                                                                                                                                                                                                                                                                                                                                                                                                                                                                                                                                                                                                                                                                                                                                                                                                                                                                                                                                                                                                                                                                                                                                                                                                                                                          | 05           | Anticonvulsants                                                                                         |
| PKD                                                                                                                                                                                                                                                                                                                                                                                                                                                                                                                                                                                                                                                                                                                                                                                                                                                                                                                                                                                                                                                                                                                                                                                                                                                                                                                                                                          | 06           | Antiparkinsonian                                                                                        |
| OPI                                                                                                                                                                                                                                                                                                                                                                                                                                                                                                                                                                                                                                                                                                                                                                                                                                                                                                                                                                                                                                                                                                                                                                                                                                                                                                                                                                          | 07           | Opioids                                                                                                 |
| COG                                                                                                                                                                                                                                                                                                                                                                                                                                                                                                                                                                                                                                                                                                                                                                                                                                                                                                                                                                                                                                                                                                                                                                                                                                                                                                                                                                          | 08           | Cognitive enhancers (cholinesterase inhibitor, memantine)                                               |
| OT                                                                                                                                                                                                                                                                                                                                                                                                                                                                                                                                                                                                                                                                                                                                                                                                                                                                                                                                                                                                                                                                                                                                                                                                                                                                                                                                                                           | 09           | Other medication that you think may affect cognition: Specify: _____                                    |
| NONE_                                                                                                                                                                                                                                                                                                                                                                                                                                                                                                                                                                                                                                                                                                                                                                                                                                                                                                                                                                                                                                                                                                                                                                                                                                                                                                                                                                        | 96           | None of the above                                                                                       |
| DK_NA                                                                                                                                                                                                                                                                                                                                                                                                                                                                                                                                                                                                                                                                                                                                                                                                                                                                                                                                                                                                                                                                                                                                                                                                                                                                                                                                                                        | 98           | <b>[DO NOT READ]</b> Don’t know / No answer                                                             |
| REFUSED                                                                                                                                                                                                                                                                                                                                                                                                                                                                                                                                                                                                                                                                                                                                                                                                                                                                                                                                                                                                                                                                                                                                                                                                                                                                                                                                                                      | 99           | <b>[DO NOT READ]</b> Refused                                                                            |

|                                              |                   |
|----------------------------------------------|-------------------|
| MED_8                                        | MED_SMKSTATUS_MSP |
| <b>[ALWAYS ASK]</b>                          |                   |
| What is the participant’s smoking status...? |                   |
| <b>READ LIST, CODE ONLY ONE RESPONSE</b>     |                   |

|          |   |                                                   |
|----------|---|---------------------------------------------------|
| YES      | 1 | Yes, he/she currently smokes                      |
| NEVER    | 2 | No, he/she does not currently smoke and never has |
| FORM_DAY | 4 | Former daily smoker (non-smoker now)              |
| FORM_OCC | 5 | Former occasional smoker (non-smoker now)         |
| DK_NA    | 8 | <b>[DO NOT READ]</b> Don't know / No answer       |
| REFUSED  | 9 | <b>[DO NOT READ]</b> Refused                      |

|                                                 |                    |                                                              |
|-------------------------------------------------|--------------------|--------------------------------------------------------------|
| <b>MED_9</b>                                    | <b>MED_CAN_MSP</b> |                                                              |
| <b>[ALWAYS ASK]</b>                             |                    |                                                              |
| Does the participant use any cannabis products? |                    |                                                              |
| <b>CODE ONLY ONE RESPONSE</b>                   |                    |                                                              |
| YES                                             | 1                  | Yes, he/she currently uses cannabis products                 |
| NEVER                                           | 2                  | No, he/she does not and has never used cannabis products     |
| FORMER                                          | 3                  | Former cannabis user, but does not use cannabis products now |
| DK_NA                                           | 8                  | <b>[DO NOT READ]</b> Don't know / No answer                  |
| REFUSED                                         | 9                  | <b>[DO NOT READ]</b> Refused                                 |

|                                            |                    |                                                    |
|--------------------------------------------|--------------------|----------------------------------------------------|
| <b>MED_10</b>                              | <b>MED_ALC_MSP</b> |                                                    |
| <b>[ALWAYS ASK]</b>                        |                    |                                                    |
| What is the participant's drinking status? |                    |                                                    |
| <b>CODE ONLY ONE RESPONSE</b>              |                    |                                                    |
| NEVER                                      | 1                  | Never drank alcohol                                |
| FORMER                                     | 2                  | Used to drink alcohol but does not currently drink |
| CURRENT                                    | 3                  | Currently consumes alcohol                         |
| DK_NA                                      | 8                  | <b>[DO NOT READ]</b> Don't know / No answer        |
| REFUSED                                    | 9                  | <b>[DO NOT READ]</b> Refused                       |

|                                                                                                                                                                                                                                             |                       |                                             |
|---------------------------------------------------------------------------------------------------------------------------------------------------------------------------------------------------------------------------------------------|-----------------------|---------------------------------------------|
| <b>MED_11</b>                                                                                                                                                                                                                               | <b>MED_ALCNMB_MSP</b> |                                             |
| <b>[ASK IF MED_ALC_MSP = CURRENT]</b>                                                                                                                                                                                                       |                       |                                             |
| A "standard" drink is considered 12 ounces of regular beer (~5% alcohol), 5 ounces of wine (~12% alcohol), or 1.5 ounces of distilled spirits (~40% alcohol). How many estimated standardized drinks per week does the participant consume? |                       |                                             |
| ALC_NB                                                                                                                                                                                                                                      | Number                | _____ <b>[MASK: MIN=0, MAX=200]</b>         |
| DK_NA                                                                                                                                                                                                                                       | 8                     | <b>[DO NOT READ]</b> Don't know / No answer |
| REFUSED                                                                                                                                                                                                                                     | 9                     | <b>[DO NOT READ]</b> Refused                |

|                                                                                                        |                        |                                             |
|--------------------------------------------------------------------------------------------------------|------------------------|---------------------------------------------|
| <b>MED_12</b>                                                                                          | <b>MED_ALCMLFQ_MSP</b> |                                             |
| <b>[ASK IF MED_ALC_MSP = CURRENT AND SDC_SEXBL_MSP = MALE]</b>                                         |                        |                                             |
| In the past 12 months, has the participant consumed 5 or more drinks in 2 hours at least once a month? |                        |                                             |
| YES                                                                                                    | 1                      | Yes                                         |
| NO                                                                                                     | 2                      | No                                          |
| DK_NA                                                                                                  | 8                      | <b>[DO NOT READ]</b> Don't know / No answer |
| REFUSED                                                                                                | 9                      | <b>[DO NOT READ]</b> Refused                |

|                                                                                                        |                        |                                             |
|--------------------------------------------------------------------------------------------------------|------------------------|---------------------------------------------|
| <b>MED_13</b>                                                                                          | <b>MED_ALCFMFQ_MSP</b> |                                             |
| <b>[ASK IF MED_ALC_MSP = CURRENT AND SDC_SEXBL_MSP = FEMALE]</b>                                       |                        |                                             |
| In the past 12 months, has the participant consumed 4 or more drinks in 2 hours at least once a month? |                        |                                             |
| YES                                                                                                    | 1                      | Yes                                         |
| NO                                                                                                     | 2                      | No                                          |
| DK_NA                                                                                                  | 8                      | <b>[DO NOT READ]</b> Don't know / No answer |
| REFUSED                                                                                                | 9                      | <b>[DO NOT READ]</b> Refused                |

|                                                                                                                |                    |                                             |
|----------------------------------------------------------------------------------------------------------------|--------------------|---------------------------------------------|
| <b>MED_14</b>                                                                                                  | <b>MED_FAM_MSP</b> |                                             |
| <b>[ALWAYS ASK]</b>                                                                                            |                    |                                             |
| Does the participant have a first degree relative who has been diagnosed with dementia or Alzheimer's Disease? |                    |                                             |
| <b>CLINICIAN NOTE:</b> First degree relatives include biological parents, siblings, or children                |                    |                                             |
| YES                                                                                                            | 1                  | Yes                                         |
| NO                                                                                                             | 2                  | No                                          |
| DK_NA                                                                                                          | 8                  | <b>[DO NOT READ]</b> Don't know / No answer |
| REFUSED                                                                                                        | 9                  | <b>[DO NOT READ]</b> Refused                |

|                     |                      |  |
|---------------------|----------------------|--|
| <b>MED_15</b>       | <b>MED_NOTES_MSP</b> |  |
| <b>[ALWAYS ASK]</b> |                      |  |

1  
2  
3  
4  
5  
6  
7  
8  
9  
10  
11  
12  
13  
14  
15  
16  
17  
18  
19  
20  
21  
22  
23  
24  
25  
26  
27  
28  
29  
30  
31  
32  
33  
34  
35  
36  
37  
38  
39  
40  
41  
42  
43  
44  
45  
46  
47  
48  
49  
50  
51  
52  
53  
54  
55  
56  
57  
58  
59  
60

|                                                                                                                                                                                                                                                                                       |   |     |
|---------------------------------------------------------------------------------------------------------------------------------------------------------------------------------------------------------------------------------------------------------------------------------------|---|-----|
| Do you have any additional notes to include for this module? For example, are there any other details regarding the participant's medical history that should be taken into account when interpreting the results of the cognitive testing such as the use of non-prescription drugs? |   |     |
| YES                                                                                                                                                                                                                                                                                   | 1 | Yes |
| NO                                                                                                                                                                                                                                                                                    | 2 | No  |

|                                                                                         |                        |
|-----------------------------------------------------------------------------------------|------------------------|
| <b>MED_16</b>                                                                           | <b>MED_NOTESSP_MSP</b> |
| <b>[ASK IF MED_NOTES_MSP = YES]</b>                                                     |                        |
| <b>CLINICIAN NOTE:</b> Please do not enter any identifying information in this section. |                        |
| Please provide any notes below:                                                         |                        |

**MED\_END**

For peer review only

## Basic Activities of Daily Living (ADL)

This module contains a subset of the Activities of Daily Living questions of the OARS Multidimensional Assessment Questionnaire© developed by Dr. Gerda G. Fillenbaum (Duke University Medical Center). The Canadian Longitudinal Study on Aging received permission from Dr. Fillenbaum (instrument developer) for the use of this instrument.

|                 |                                                                                                                                                                                                                                                                                                                                                                                                                                                                                                                                                                                                                                                                                                                                                                                                                                                                                                                                                                                        |
|-----------------|----------------------------------------------------------------------------------------------------------------------------------------------------------------------------------------------------------------------------------------------------------------------------------------------------------------------------------------------------------------------------------------------------------------------------------------------------------------------------------------------------------------------------------------------------------------------------------------------------------------------------------------------------------------------------------------------------------------------------------------------------------------------------------------------------------------------------------------------------------------------------------------------------------------------------------------------------------------------------------------|
| <b>Overview</b> | <p>Activities of daily living assess respondents' ability to perform <u>basic</u> daily activities. Activities of daily living are the tasks considered vital to live independently in the community. This module contains key activities relevant to neurocognitive disorders and is a subset of the list of questions asked to the informant regarding the participant's ability to perform activities independently. The informant supplied data will in most cases be used to determine the participant's functional abilities. Exceptions would include where the informant is not able to respond to the functional questions or where the accuracy of the information they provide is judged less reliable than the information provided by the participant.</p> <p>Clinicians are expected to complete all items in this module. However, they have flexibility in determining the order in which the questions are asked and the specific wording used for each question.</p> |
|-----------------|----------------------------------------------------------------------------------------------------------------------------------------------------------------------------------------------------------------------------------------------------------------------------------------------------------------------------------------------------------------------------------------------------------------------------------------------------------------------------------------------------------------------------------------------------------------------------------------------------------------------------------------------------------------------------------------------------------------------------------------------------------------------------------------------------------------------------------------------------------------------------------------------------------------------------------------------------------------------------------------|

Now I'd like to ask you about activities of daily living. You may feel that some of these questions do not apply to you, but it is important that we ask the same questions of everyone.

|                                                                                                                 |                      |                                             |
|-----------------------------------------------------------------------------------------------------------------|----------------------|---------------------------------------------|
| <b>ADL_1</b>                                                                                                    | <b>ADL_ABLDR_MSP</b> |                                             |
| <b>[ALWAYS ASK]</b>                                                                                             |                      |                                             |
| Can you dress and undress yourself without help (including picking out clothes and putting on socks and shoes)? |                      |                                             |
| YES                                                                                                             | 1                    | Yes                                         |
| NO                                                                                                              | 2                    | No                                          |
| DK_NA                                                                                                           | 8                    | <b>[DO NOT READ]</b> Don't know / No answer |
| REFUSED                                                                                                         | 9                    | <b>[DO NOT READ]</b> Refused                |

|                                                    |                     |                                             |
|----------------------------------------------------|---------------------|---------------------------------------------|
| <b>ADL_2</b>                                       | <b>ADL_HPDR_MSP</b> |                                             |
| <b>[ASK IF ADL_ABLDR_MSP = NO]</b>                 |                     |                                             |
| Can you dress and undress yourself with some help? |                     |                                             |
| YES                                                | 1                   | Yes                                         |
| NO                                                 | 2                   | No                                          |
| DK_NA                                              | 8                   | <b>[DO NOT READ]</b> Don't know / No answer |
| REFUSED                                            | 9                   | <b>[DO NOT READ]</b> Refused                |

|                                                          |                     |                                             |
|----------------------------------------------------------|---------------------|---------------------------------------------|
| <b>ADL_3</b>                                             | <b>ADL_UNDR_MSP</b> |                                             |
| <b>[ASK IF ADL_HPDR_MSP = NO]</b>                        |                     |                                             |
| Are you completely unable to dress and undress yourself? |                     |                                             |
| YES                                                      | 1                   | Yes                                         |
| NO                                                       | 2                   | No                                          |
| DK_NA                                                    | 8                   | <b>[DO NOT READ]</b> Don't know / No answer |
| REFUSED                                                  | 9                   | <b>[DO NOT READ]</b> Refused                |

|                                             |                      |                                             |
|---------------------------------------------|----------------------|---------------------------------------------|
| <b>ADL_4</b>                                | <b>ADL_ABLBT_MSP</b> |                                             |
| <b>[ALWAYS ASK]</b>                         |                      |                                             |
| Can you take a bath or shower without help? |                      |                                             |
| YES                                         | 1                    | Yes                                         |
| NO                                          | 2                    | No                                          |
| DK_NA                                       | 8                    | <b>[DO NOT READ]</b> Don't know / No answer |
| REFUSED                                     | 9                    | <b>[DO NOT READ]</b> Refused                |

|                                                                                                                                                           |                     |                                             |
|-----------------------------------------------------------------------------------------------------------------------------------------------------------|---------------------|---------------------------------------------|
| <b>ADL_5</b>                                                                                                                                              | <b>ADL_HPBT_MSP</b> |                                             |
| <b>[ASK IF ADL_ABLBT_MSP = NO]</b>                                                                                                                        |                     |                                             |
| Can you take a bath or shower with some help (i.e., you need help from someone getting in and out of the tub or you need special attachments on the tub)? |                     |                                             |
| YES                                                                                                                                                       | 1                   | Yes                                         |
| NO                                                                                                                                                        | 2                   | No                                          |
| DK_NA                                                                                                                                                     | 8                   | <b>[DO NOT READ]</b> Don't know / No answer |
| REFUSED                                                                                                                                                   | 9                   | <b>[DO NOT READ]</b> Refused                |

|                                                                    |                     |                                             |
|--------------------------------------------------------------------|---------------------|---------------------------------------------|
| <b>ADL_6</b>                                                       | <b>ADL_UNBT_MSP</b> |                                             |
| <b>[ASK IF ADL_HPBT_MSP = NO]</b>                                  |                     |                                             |
| Are you completely unable to take a bath and a shower by yourself? |                     |                                             |
| YES                                                                | 1                   | Yes                                         |
| NO                                                                 | 2                   | No                                          |
| DK_NA                                                              | 8                   | <b>[DO NOT READ]</b> Don't know / No answer |
| REFUSED                                                            | 9                   | <b>[DO NOT READ]</b> Refused                |

|                                                           |                     |                                             |
|-----------------------------------------------------------|---------------------|---------------------------------------------|
| <b>ADL_7</b>                                              | <b>ADL_BATH_MSP</b> |                                             |
| <b>[ALWAYS ASK]</b>                                       |                     |                                             |
| Do you ever have trouble getting to the bathroom in time? |                     |                                             |
| YES                                                       | 1                   | Yes                                         |
| NO                                                        | 2                   | No                                          |
| DK_NA                                                     | 8                   | <b>[DO NOT READ]</b> Don't know / No answer |
| REFUSED                                                   | 9                   | <b>[DO NOT READ]</b> Refused                |

|                                                                               |                      |                                             |
|-------------------------------------------------------------------------------|----------------------|---------------------------------------------|
| <b>ADL_8</b>                                                                  | <b>ADL_INCNT_MSP</b> |                                             |
| <b>[ASK IF ADL_BATH_MSP = YES]</b>                                            |                      |                                             |
| How often do you wet or soil yourself (either day or night)? Would you say... |                      |                                             |
| <b>READ LIST, CODE ONLY ONE RESPONSE</b>                                      |                      |                                             |
| 0_1_TIME_WEEK                                                                 | 1                    | Never or less than once a week              |
| 1_2_TIME_WEEK                                                                 | 2                    | Once or twice a week                        |
| 3_MORE_TIMES_WEEK                                                             | 3                    | Three times a week or more                  |
| DK_NA                                                                         | 8                    | <b>[DO NOT READ]</b> Don't know / No answer |
| REFUSED                                                                       | 9                    | <b>[DO NOT READ]</b> Refused                |

|                                                              |                      |     |
|--------------------------------------------------------------|----------------------|-----|
| <b>ADL_9</b>                                                 | <b>ADL_NOTES_MSP</b> |     |
| <b>[ALWAYS ASK]</b>                                          |                      |     |
| Do you have any additional notes to include for this module? |                      |     |
| YES                                                          | 1                    | Yes |
| NO                                                           | 2                    | No  |

|                                                                                         |                         |  |
|-----------------------------------------------------------------------------------------|-------------------------|--|
| <b>ADL_10</b>                                                                           | <b>ADL_NOTES_SP_MSP</b> |  |
| <b>[ASK IF ADL_NOTES_MSP = YES]</b>                                                     |                         |  |
| <b>CLINICIAN NOTE:</b> Please do not enter any identifying information in this section. |                         |  |
| Please provide any notes below:                                                         |                         |  |

**ADL\_END**

## Instrumental Activities of Daily Living (IADL)

*This module contains a subset of the Activities of Daily Living questions of the OARS Multidimensional Assessment Questionnaire© developed by Dr. Gerda G. Fillenbaum (Duke University Medical Center). The Canadian Longitudinal Study on Aging received permission from Dr. Fillenbaum (instrument developer) for the use of this instrument.*

|                 |                                                                                                                                                                                                                                                                                                                                                                                                                                                                                                                                                                                                                                                                                                                                                                                                                                                                                                                                                                       |
|-----------------|-----------------------------------------------------------------------------------------------------------------------------------------------------------------------------------------------------------------------------------------------------------------------------------------------------------------------------------------------------------------------------------------------------------------------------------------------------------------------------------------------------------------------------------------------------------------------------------------------------------------------------------------------------------------------------------------------------------------------------------------------------------------------------------------------------------------------------------------------------------------------------------------------------------------------------------------------------------------------|
| <b>Overview</b> | <p>The Instrumental Activities of Daily Living (IADL) scale assesses respondents' ability to independently perform a series of daily activities.</p> <p>This module contains key instrumental activities of daily living relevant to neurocognitive disorders and is a subset of the list of questions asked to the informant regarding the participant's ability to perform activities independently. The informant supplied data will in most cases be used to determine the participant's functional abilities. Exceptions would include where the informant is not able to respond to the functional questions or where the accuracy of the information they provide is judged less reliable than the information provided by the participant.</p> <p>Clinicians are expected to complete all items in this module. However, they have flexibility in determining the order in which the questions are asked and the specific wording used for each question.</p> |
|-----------------|-----------------------------------------------------------------------------------------------------------------------------------------------------------------------------------------------------------------------------------------------------------------------------------------------------------------------------------------------------------------------------------------------------------------------------------------------------------------------------------------------------------------------------------------------------------------------------------------------------------------------------------------------------------------------------------------------------------------------------------------------------------------------------------------------------------------------------------------------------------------------------------------------------------------------------------------------------------------------|

Now I'd like to ask you about some activities of daily living. You may feel that some of these questions do not apply to you, but it is important that we ask the same questions of everyone.

|                                                                                                         |                       |                                             |
|---------------------------------------------------------------------------------------------------------|-----------------------|---------------------------------------------|
| <b>IAL_1</b>                                                                                            | <b>IAL_ABLGRO_MSP</b> |                                             |
| <b>[ALWAYS ASK]</b>                                                                                     |                       |                                             |
| Can you go shopping for groceries or clothes without help (taking care of all shopping needs yourself)? |                       |                                             |
| YES                                                                                                     | 1                     | Yes                                         |
| NO                                                                                                      | 2                     | No                                          |
| DK_NA                                                                                                   | 8                     | <b>[DO NOT READ]</b> Don't know / No answer |
| REFUSED                                                                                                 | 9                     | <b>[DO NOT READ]</b> Refused                |

|                                                                                                                            |                      |                                             |
|----------------------------------------------------------------------------------------------------------------------------|----------------------|---------------------------------------------|
| <b>IAL_2</b>                                                                                                               | <b>IAL_HPGRO_MSP</b> |                                             |
| <b>[ASK IF IAL_ABLGRO_MSP = NO]</b>                                                                                        |                      |                                             |
| Can you go shopping for groceries or clothes with some help (i.e., you need someone to go with you on all shopping trips)? |                      |                                             |
| YES                                                                                                                        | 1                    | Yes                                         |
| NO                                                                                                                         | 2                    | No                                          |
| DK_NA                                                                                                                      | 8                    | <b>[DO NOT READ]</b> Don't know / No answer |
| REFUSED                                                                                                                    | 9                    | <b>[DO NOT READ]</b> Refused                |



|                                               |                      |                                             |
|-----------------------------------------------|----------------------|---------------------------------------------|
| <b>IAL_3</b>                                  | <b>IAL_UNGRO_MSP</b> |                                             |
| <b>[ASK IF IAL_HPGRO_MSP = NO]</b>            |                      |                                             |
| Are you completely unable to do any shopping? |                      |                                             |
| YES                                           | 1                    | Yes                                         |
| NO                                            | 2                    | No                                          |
| DK_NA                                         | 8                    | <b>[DO NOT READ]</b> Don't know / No answer |
| REFUSED                                       | 9                    | <b>[DO NOT READ]</b> Refused                |

|                                                                                            |                      |                                             |
|--------------------------------------------------------------------------------------------|----------------------|---------------------------------------------|
| <b>IAL_4</b>                                                                               | <b>IAL_ABLML_MSP</b> |                                             |
| <b>[ALWAYS ASK]</b>                                                                        |                      |                                             |
| Can you prepare your own meals without help (i.e., you plan and cook full meals yourself)? |                      |                                             |
| YES                                                                                        | 1                    | Yes                                         |
| NO                                                                                         | 2                    | No                                          |
| DK_NA                                                                                      | 8                    | <b>[DO NOT READ]</b> Don't know / No answer |
| REFUSED                                                                                    | 9                    | <b>[DO NOT READ]</b> Refused                |

|                                                                                                                               |                     |                                             |
|-------------------------------------------------------------------------------------------------------------------------------|---------------------|---------------------------------------------|
| <b>IAL_5</b>                                                                                                                  | <b>IAL_HPML_MSP</b> |                                             |
| <b>[ASK IF IAL_ABLML_MSP = NO]</b>                                                                                            |                     |                                             |
| Can you prepare your own meals with some help (i.e., you can prepare some things but are unable to cook full meals yourself)? |                     |                                             |
| YES                                                                                                                           | 1                   | Yes                                         |
| NO                                                                                                                            | 2                   | No                                          |
| DK_NA                                                                                                                         | 8                   | <b>[DO NOT READ]</b> Don't know / No answer |
| REFUSED                                                                                                                       | 9                   | <b>[DO NOT READ]</b> Refused                |

|                                                 |                     |                                             |
|-------------------------------------------------|---------------------|---------------------------------------------|
| <b>IAL_6</b>                                    | <b>IAL_UNML_MSP</b> |                                             |
| <b>[ASK IF IAL_HPML_MSP = NO]</b>               |                     |                                             |
| Are you completely unable to prepare any meals? |                     |                                             |
| YES                                             | 1                   | Yes                                         |
| NO                                              | 2                   | No                                          |
| DK_NA                                           | 8                   | <b>[DO NOT READ]</b> Don't know / No answer |
| REFUSED                                         | 9                   | <b>[DO NOT READ]</b> Refused                |

|                                                                                        |                |                                             |
|----------------------------------------------------------------------------------------|----------------|---------------------------------------------|
| IAL_7                                                                                  | IAL_ABLMED_MSP |                                             |
| <b>[ALWAYS ASK]</b>                                                                    |                |                                             |
| Can you take your own medicine without help (in the right doses at the right time)?    |                |                                             |
| <b>CLINICIAN INSTRUCTIONS: IF THE PARTICIPANT OCCASIONALLY FORGETS, CODE AS 'YES'.</b> |                |                                             |
| YES                                                                                    | 1              | Yes                                         |
| NO                                                                                     | 2              | No                                          |
| DK_NA                                                                                  | 8              | <b>[DO NOT READ]</b> Don't know / No answer |
| REFUSED                                                                                | 9              | <b>[DO NOT READ]</b> Refused                |

|                                                                                                                                               |               |                                             |
|-----------------------------------------------------------------------------------------------------------------------------------------------|---------------|---------------------------------------------|
| IAL_8                                                                                                                                         | IAL_HPMED_MSP |                                             |
| <b>[ASK IF IAL_ABLMED_MSP = NO]</b>                                                                                                           |               |                                             |
| Can you take your own medicine with some help (i.e., you are able to take medicine if someone prepares it for you or reminds you to take it)? |               |                                             |
| YES                                                                                                                                           | 1             | Yes                                         |
| NO                                                                                                                                            | 2             | No                                          |
| DK_NA                                                                                                                                         | 8             | <b>[DO NOT READ]</b> Don't know / No answer |
| REFUSED                                                                                                                                       | 9             | <b>[DO NOT READ]</b> Refused                |

|                                                  |               |                                             |
|--------------------------------------------------|---------------|---------------------------------------------|
| IAL_9                                            | IAL_UNMED_MSP |                                             |
| <b>[ASK IF IAL_HPMED_MSP = NO]</b>               |               |                                             |
| Are you completely unable to take your medicine? |               |                                             |
| YES                                              | 1             | Yes                                         |
| NO                                               | 2             | No                                          |
| DK_NA                                            | 8             | <b>[DO NOT READ]</b> Don't know / No answer |
| REFUSED                                          | 9             | <b>[DO NOT READ]</b> Refused                |

|                                                                                        |               |                                             |
|----------------------------------------------------------------------------------------|---------------|---------------------------------------------|
| IAL_10                                                                                 | IAL_ABLMO_MSP |                                             |
| <b>[ALWAYS ASK]</b>                                                                    |               |                                             |
| Can you handle your own money without help (i.e., you write cheques, pay bills, etc.)? |               |                                             |
| <b>CLINICIAN INSTRUCTIONS: IF THE PARTICIPANT OCCASIONALLY FORGETS, CODE AS 'YES'.</b> |               |                                             |
| YES                                                                                    | 1             | Yes                                         |
| NO                                                                                     | 2             | No                                          |
| DK_NA                                                                                  | 8             | <b>[DO NOT READ]</b> Don't know / No answer |
| REFUSED                                                                                | 9             | <b>[DO NOT READ]</b> Refused                |

|                                                                                                                                                     |              |                                             |
|-----------------------------------------------------------------------------------------------------------------------------------------------------|--------------|---------------------------------------------|
| IAL_11                                                                                                                                              | IAL_HPMO_MSP |                                             |
| <b>[ASK IF IAL_ABLMO_MSP = NO]</b>                                                                                                                  |              |                                             |
| Can you handle your own money with some help (i.e., you manage day-to-day buying but need help with managing your chequebook or paying your bills)? |              |                                             |
| YES                                                                                                                                                 | 1            | Yes                                         |
| NO                                                                                                                                                  | 2            | No                                          |
| DK_NA                                                                                                                                               | 8            | <b>[DO NOT READ]</b> Don't know / No answer |
| REFUSED                                                                                                                                             | 9            | <b>[DO NOT READ]</b> Refused                |

|                                                 |              |                                             |
|-------------------------------------------------|--------------|---------------------------------------------|
| IAL_12                                          | IAL_UNMO_MSP |                                             |
| <b>[ASK IF IAL_HPMO_MSP = NO]</b>               |              |                                             |
| Are you completely unable to handle your money? |              |                                             |
| YES                                             | 1            | Yes                                         |
| NO                                              | 2            | No                                          |
| DK_NA                                           | 8            | <b>[DO NOT READ]</b> Don't know / No answer |
| REFUSED                                         | 9            | <b>[DO NOT READ]</b> Refused                |

|                                                                                         |                      |                                             |
|-----------------------------------------------------------------------------------------|----------------------|---------------------------------------------|
| <b>IAL_13</b>                                                                           | <b>IAL_FUNCT_MSP</b> |                                             |
| <b>[ALWAYS ASK]</b>                                                                     |                      |                                             |
| Have you experienced any changes in your functional abilities due to cognitive changes? |                      |                                             |
| YES                                                                                     | 1                    | Yes                                         |
| NO                                                                                      | 2                    | No                                          |
| DK_NA                                                                                   | 8                    | <b>[DO NOT READ]</b> Don't know / No answer |
| REFUSED                                                                                 | 9                    | <b>[DO NOT READ]</b> Refused                |

|                                                              |                      |     |
|--------------------------------------------------------------|----------------------|-----|
| <b>IAL_14</b>                                                | <b>IAL_NOTES_MSP</b> |     |
| <b>[ALWAYS ASK]</b>                                          |                      |     |
| Do you have any additional notes to include for this module? |                      |     |
| YES                                                          | 1                    | Yes |
| NO                                                           | 2                    | No  |

|                                                                                         |                         |  |
|-----------------------------------------------------------------------------------------|-------------------------|--|
| <b>IAL_15</b>                                                                           | <b>IAL_NOTES_SP_MSP</b> |  |
| <b>[ASK IF IAL_NOTES_MSP = YES]</b>                                                     |                         |  |
| <b>CLINICIAN NOTE:</b> Please do not enter any identifying information in this section. |                         |  |
| Please provide any notes below:                                                         |                         |  |

**IAL\_END**

## Transportation (TRA)

|                 |                                                                                                                                                                                                                                                                                                                                                                                                                                                                                                                                                                                                                                                                                                                                                                       |
|-----------------|-----------------------------------------------------------------------------------------------------------------------------------------------------------------------------------------------------------------------------------------------------------------------------------------------------------------------------------------------------------------------------------------------------------------------------------------------------------------------------------------------------------------------------------------------------------------------------------------------------------------------------------------------------------------------------------------------------------------------------------------------------------------------|
| <b>Overview</b> | <p>The questions in this module ask participants about their driving status, and details regarding their license status.</p> <p>The informant is also being asked questions about the participant's driving. The informant supplied data will in most cases be used to determine the participant's driving status. Exceptions would include where the informant is not able to respond to the functional questions or where the accuracy of the information they provide is judged less reliable than the information provided by the participant.</p> <p>Clinicians are expected to complete all items in this module. However, they have flexibility in determining the order in which the questions are asked and the specific wording used for each question.</p> |
|-----------------|-----------------------------------------------------------------------------------------------------------------------------------------------------------------------------------------------------------------------------------------------------------------------------------------------------------------------------------------------------------------------------------------------------------------------------------------------------------------------------------------------------------------------------------------------------------------------------------------------------------------------------------------------------------------------------------------------------------------------------------------------------------------------|

|                                                                                                                 |                        |                                                                                                                                                      |
|-----------------------------------------------------------------------------------------------------------------|------------------------|------------------------------------------------------------------------------------------------------------------------------------------------------|
| <b>TRA_1</b>                                                                                                    | <b>TRA_DSTATUS_MSP</b> |                                                                                                                                                      |
| <b>[ALWAYS ASK]</b>                                                                                             |                        |                                                                                                                                                      |
| Which of the following describes the participant's driving status? (Include cars, vans, trucks and motorcycles) |                        |                                                                                                                                                      |
| <b>READ LIST, CODE ONLY ONE RESPONSE</b>                                                                        |                        |                                                                                                                                                      |
| NEVER                                                                                                           | 1                      | Never had a driver's license                                                                                                                         |
| FORMER                                                                                                          | 2                      | Had a driver's license at one point in his or her life, but currently do not have it                                                                 |
| CURRENT                                                                                                         | 3                      | Have a driver's license without restrictions (except corrective lenses )                                                                             |
| RESTRICTED                                                                                                      | 4                      | Have a driver's license with restrictions on time of driving (daylight only), distance from home, type of road (no highway), or number of passengers |
| DK_NA                                                                                                           | 8                      | <b>[DO NOT READ]</b> Don't know / No answer                                                                                                          |
| REFUSED                                                                                                         | 9                      | <b>[DO NOT READ]</b> Refused                                                                                                                         |

|                                       |                     |                                             |
|---------------------------------------|---------------------|---------------------------------------------|
| <b>TRA_2</b>                          | <b>TRA_STOP_MSP</b> |                                             |
| <b>[ASK IF TRA_STA_MSP = FORMER]</b>  |                     |                                             |
| Why did the participant stop driving? |                     |                                             |
| <b>CODE ONLY ONE RESPONSE</b>         |                     |                                             |
| VOL_STOP                              | 1                   | Voluntarily stopped driving                 |
| LICS_RESC                             | 2                   | License rescinded                           |
| OT_SP                                 | 3                   | Other (please specify: _____)               |
| DK_NA                                 | 8                   | <b>[DO NOT READ]</b> Don't know / No answer |
| REFUSED                               | 9                   | <b>[DO NOT READ]</b> Refused                |

|                                                               |                       |                                                          |  |
|---------------------------------------------------------------|-----------------------|----------------------------------------------------------|--|
| <b>TRA_3</b>                                                  | <b>TRA_STOPYR_MSP</b> |                                                          |  |
| <b>[ASK IF TRA_STA_MSP = FORMER]</b>                          |                       |                                                          |  |
| At what age or in what year did the participant stop driving? |                       |                                                          |  |
| YR_SP                                                         | Year                  | _____ <b>[MASK: MIN=YEAR OF BIRTH, MAX=CURRENT YEAR]</b> |  |
| NB_SP                                                         | Age                   | _____ <b>[MASK:MIN=00, MAX=CURRENT AGE]</b>              |  |
| DK_NA                                                         | 9998                  | <b>[DO NOT READ]</b> Don't know / No answer              |  |
| REFUSED                                                       | 9999                  | <b>[DO NOT READ]</b> Refused                             |  |

|                                                              |                      |   |     |
|--------------------------------------------------------------|----------------------|---|-----|
| <b>TRA_4</b>                                                 | <b>TRA_NOTES_MSP</b> |   |     |
| <b>[ALWAYS ASK]</b>                                          |                      |   |     |
| Do you have any additional notes to include for this module? |                      |   |     |
| YES                                                          |                      | 1 | Yes |
| NO                                                           |                      | 2 | No  |

|                                                                                         |                         |  |  |
|-----------------------------------------------------------------------------------------|-------------------------|--|--|
| <b>TRA_5</b>                                                                            | <b>TRA_NOTES_SP_MSP</b> |  |  |
| <b>[ASK IF TRA_NOTES_MSP = YES]</b>                                                     |                         |  |  |
| <b>CLINICIAN NOTE:</b> Please do not enter any identifying information in this section. |                         |  |  |
| Please provide any notes below:                                                         |                         |  |  |

**TRA\_END**

## Mood and Behaviour (BHV)

The first two questions of this module are from the Patient Health Questionnaire-2 (PHQ-2). It is publicly available and no permission is required to use, reproduce, or distribute the tools.

Kroenke K, Spitzer RL, Williams JB. The Patient Health Questionnaire-2: Validity of a Two-Item Depression Screener. *Medical Care*. 2003;41:1284-92. The other questions in this module capture information on mood and behaviour relevant to the diagnosis of neurocognitive disorder.

|                 |                                                                                                                                                                                                                                                                                                                                                                           |
|-----------------|---------------------------------------------------------------------------------------------------------------------------------------------------------------------------------------------------------------------------------------------------------------------------------------------------------------------------------------------------------------------------|
| <b>Overview</b> | <p>The questions in this module ask participants about their mood and behaviour.</p> <p>Clinicians are expected to complete all items in this module. However, with the exception of the first two questions (BHV_DEP1 and BHV_DEP2) they have flexibility in determining the order in which the questions are asked and the specific wording used for each question.</p> |
|-----------------|---------------------------------------------------------------------------------------------------------------------------------------------------------------------------------------------------------------------------------------------------------------------------------------------------------------------------------------------------------------------------|

**Physician Note: Please read the first two questions verbatim.**

**Over the past 2 weeks, how often have you been bothered by any of the following problems...?**

|                                              |                     |                                             |  |
|----------------------------------------------|---------------------|---------------------------------------------|--|
| <b>BHV_1</b>                                 | <b>BHV_DEP1_MSP</b> |                                             |  |
| <b>[ALWAYS ASK]</b>                          |                     |                                             |  |
| Little interest or pleasure in doing things? |                     |                                             |  |
| <b>READ LIST, CODE ONLY ONE RESPONSE</b>     |                     |                                             |  |
| NO                                           | 1                   | Not at all                                  |  |
| SEVERAL                                      | 2                   | Several days                                |  |
| HALF                                         | 3                   | More than half the days                     |  |
| EVERY                                        | 4                   | Almost every day                            |  |
| DK_NA                                        | 8                   | <b>[DO NOT READ]</b> Don't know / No answer |  |
| REFUSED                                      | 9                   | <b>[DO NOT READ]</b> Refused                |  |

|                                          |                     |                                             |  |
|------------------------------------------|---------------------|---------------------------------------------|--|
| <b>BHV_2</b>                             | <b>BHV_DEP2_MSP</b> |                                             |  |
| <b>[ALWAYS ASK]</b>                      |                     |                                             |  |
| Feeling down, depressed or hopeless?     |                     |                                             |  |
| <b>READ LIST, CODE ONLY ONE RESPONSE</b> |                     |                                             |  |
| NO                                       | 1                   | Not at all                                  |  |
| SEVERAL                                  | 2                   | Several days                                |  |
| HALF                                     | 3                   | More than half the days                     |  |
| EVERY                                    | 4                   | Almost every day                            |  |
| DK_NA                                    | 8                   | <b>[DO NOT READ]</b> Don't know / No answer |  |
| REFUSED                                  | 9                   | <b>[DO NOT READ]</b> Refused                |  |

|                                                                                                                                                     |                     |                                             |
|-----------------------------------------------------------------------------------------------------------------------------------------------------|---------------------|---------------------------------------------|
| <b>BHV_3</b>                                                                                                                                        | <b>BHV_PERS_MSP</b> |                                             |
| <b>[ALWAYS ASK]</b>                                                                                                                                 |                     |                                             |
| Has the participant noted any persistent adverse changes in their personality (such as apathy, irritability, or lability) lasting a year or longer? |                     |                                             |
| YES                                                                                                                                                 | 1                   | Yes                                         |
| NO                                                                                                                                                  | 2                   | No                                          |
| DK_NA                                                                                                                                               | 8                   | <b>[DO NOT READ]</b> Don't know / No answer |
| REFUSED                                                                                                                                             | 9                   | <b>[DO NOT READ]</b> Refused                |

|                                                    |                    |                                             |
|----------------------------------------------------|--------------------|---------------------------------------------|
| <b>BHV_4</b>                                       | <b>BHV_ANX_MSP</b> |                                             |
| <b>[ALWAYS ASK]</b>                                |                    |                                             |
| Is the participant currently experiencing anxiety? |                    |                                             |
| YES                                                | 1                  | Yes                                         |
| NO                                                 | 2                  | No                                          |
| DK_NA                                              | 8                  | <b>[DO NOT READ]</b> Don't know / No answer |
| REFUSED                                            | 9                  | <b>[DO NOT READ]</b> Refused                |

|                                                                       |                    |                                             |
|-----------------------------------------------------------------------|--------------------|---------------------------------------------|
| <b>BHV_5</b>                                                          | <b>BHV_SUS_MSP</b> |                                             |
| <b>[ALWAYS ASK]</b>                                                   |                    |                                             |
| Is the participant currently experiencing feelings of suspiciousness? |                    |                                             |
| YES                                                                   | 1                  | Yes                                         |
| NO                                                                    | 2                  | No                                          |
| DK_NA                                                                 | 8                  | <b>[DO NOT READ]</b> Don't know / No answer |
| REFUSED                                                               | 9                  | <b>[DO NOT READ]</b> Refused                |

|                                                                                                 |                    |     |
|-------------------------------------------------------------------------------------------------|--------------------|-----|
| <b>BHV_6</b>                                                                                    | <b>BHV_PSY_MSP</b> |     |
| <b>[ALWAYS ASK]</b>                                                                             |                    |     |
| Is the participant currently experiencing psychotic symptoms (delusions and/or hallucinations)? |                    |     |
| YES                                                                                             | 1                  | Yes |



|         |   |                                             |
|---------|---|---------------------------------------------|
| NO      | 2 | No                                          |
| DK_NA   | 8 | <b>[DO NOT READ]</b> Don't know / No answer |
| REFUSED | 9 | <b>[DO NOT READ]</b> Refused                |

|                                                              |                      |     |
|--------------------------------------------------------------|----------------------|-----|
| <b>BHV_7</b>                                                 | <b>BHV_NOTES_MSP</b> |     |
| <b>[ALWAYS ASK]</b>                                          |                      |     |
| Do you have any additional notes to include for this module? |                      |     |
| YES                                                          | 1                    | Yes |
| NO                                                           | 2                    | No  |

|                                                                                                                                                                                                                   |                         |  |
|-------------------------------------------------------------------------------------------------------------------------------------------------------------------------------------------------------------------|-------------------------|--|
| <b>BHV_8</b>                                                                                                                                                                                                      | <b>BHV_NOTES_SP_MSP</b> |  |
| <b>[ASK IF BHV_NOTES_MSP = YES]</b>                                                                                                                                                                               |                         |  |
| <b>CLINICIAN NOTE:</b> Please do not enter any identifying information in this section.                                                                                                                           |                         |  |
| Please provide any notes below. For example, are there any other details regarding the participant's mood and behaviour that should be taken into account when interpreting the results of the cognitive testing? |                         |  |

**BHV\_END**

## Physical Examination (EXM)

|                 |                                                                                                                                                                |
|-----------------|----------------------------------------------------------------------------------------------------------------------------------------------------------------|
| <b>Overview</b> | Clinicians are expected to complete all items in this module. However, they have flexibility in determining the order in which the physical exam is completed. |
|-----------------|----------------------------------------------------------------------------------------------------------------------------------------------------------------|

|                                                                                |                      |          |
|--------------------------------------------------------------------------------|----------------------|----------|
| <b>EXM_1</b>                                                                   | <b>EXM_ALERT_MSP</b> |          |
| <b>[ALWAYS ASK]</b>                                                            |                      |          |
| Is the alertness/level of consciousness of the participant normal or abnormal? |                      |          |
| <b>CODE ONLY ONE RESPONSE</b>                                                  |                      |          |
| NRM                                                                            | 1                    | Normal   |
| ABNRM                                                                          | 2                    | Abnormal |
| UNSURE                                                                         | 7                    | Unsure   |

|                                                          |                     |     |
|----------------------------------------------------------|---------------------|-----|
| <b>EXM_2</b>                                             | <b>EXM_HEAR_MSP</b> |     |
| <b>[ALWAYS ASK]</b>                                      |                     |     |
| Is the participant willing to complete the hearing test? |                     |     |
| YES                                                      | 1                   | Yes |
| NO                                                       | 2                   | No  |

To evaluate hearing, please follow these instructions:

1. Position yourself approximately 60cm from the participant's ear
2. Mask the ear not being tested by rubbing the tragus. Do not place your arm across the face of the participant when rubbing the tragus, it is far nicer to occlude the ear from behind the head. If possible shield the participant's eyes to prevent any visual stimulus.
3. Whisper a number or word.
4. Ask the participant to repeat the number or word back to you. If they get two-thirds or more correct then their hearing level is 12db or better. If there is no response use a conversational voice (48db or louder) or loud voice (76db or louder).
5. If there is no response you can move closer and repeat the test at 15cm. Here the thresholds are 34db for a whisper and 56db for a conversational voice.
6. Assess the other ear in the same way.
7. Modifications may have to be made if personal protective equipment is worn.

|              |                            |
|--------------|----------------------------|
| <b>EXM_3</b> | <b>EXM_HEARRIGHT12_MSP</b> |
|--------------|----------------------------|

**[ASK IF EXM\_HEAR\_MSP = YES]**

Was the participant able to correctly repeat back the word or number you whispered at a distance of 60cm in their right ear?

**CODE ONLY ONE RESPONSE**

|         |   |                  |
|---------|---|------------------|
| YES     | 1 | Yes              |
| NO      | 2 | No               |
| NOTDONE | 8 | Unable to assess |

**EXM\_4      EXM\_HEARRIGHT48\_MSP****[ASK IF EXM\_HEARRIGHT12\_MSP = NO]**

Was the participant able to correctly repeat back the word or number you spoke using a conversational volume at a distance of 60cm in their right ear??

**CODE ONLY ONE RESPONSE**

|         |   |                  |
|---------|---|------------------|
| YES     | 1 | Yes              |
| NO      | 2 | No               |
| NOTDONE | 8 | Unable to assess |

**EXM\_5      EXM\_HEARRIGHT76\_MSP****[ASK IF EXM\_HEARRIGHT48\_MSP = NO]**

Was the participant able to correctly repeat back the word or number you spoke using a loud voice at a distance of 60cm in their right ear??

**CODE ONLY ONE RESPONSE**

|         |   |                  |
|---------|---|------------------|
| YES     | 1 | Yes              |
| NO      | 2 | No               |
| NOTDONE | 8 | Unable to assess |

**EXM\_6      EXM\_HEARRIGHT34\_MSP****[ASK IF EXM\_HEARRIGHT76\_MSP = NO]**

Was the participant able to correctly repeat back the word or number you whispered at a distance of 15cm in their right ear??

**CODE ONLY ONE RESPONSE**

|         |   |                  |
|---------|---|------------------|
| YES     | 1 | Yes              |
| NO      | 2 | No               |
| NOTDONE | 8 | Unable to assess |

**EXM\_7**      **EXM\_HEARRIGHT56\_MSP**

**[ASK IF EXM\_HEARRIGHT34\_MSP = NO]**

Was the participant able to correctly repeat back the word or number you spoke using a conversational volume at a distance of 15cm in their right ear??

**CODE ONLY ONE RESPONSE**

|         |   |                  |
|---------|---|------------------|
| YES     | 1 | Yes              |
| NO      | 2 | No               |
| NOTDONE | 8 | Unable to assess |

**EXM\_8**      **EXM\_HEARLEFT12\_MSP**

**[ASK IF EXM\_HEAR\_MSP = YES]**

Was the participant able to correctly repeat back the word or number you whispered at a distance of 60cm in their left ear??

**CODE ONLY ONE RESPONSE**

|         |   |                  |
|---------|---|------------------|
| YES     | 1 | Yes              |
| NO      | 2 | No               |
| NOTDONE | 8 | Unable to assess |

**EXM\_9**      **EXM\_HEARLEFT48\_MSP**

**[ASK IF EXM\_HEARLEFT12\_MSP = NO]**

Was the participant able to correctly repeat back the word or number you spoke using a conversational volume at a distance of 60cm in their left ear??

**CODE ONLY ONE RESPONSE**

|         |   |                  |
|---------|---|------------------|
| YES     | 1 | Yes              |
| NO      | 2 | No               |
| NOTDONE | 8 | Unable to assess |

**EXM\_10**      **EXM\_HEARLEFT76\_MSP**

**[ASK IF EXM\_HEARLEFT48\_MSP = NO]**

Was the participant able to correctly repeat back the word or number you spoke using a loud voice at a distance of 60cm in their left ear??

**CODE ONLY ONE RESPONSE**

|         |   |                  |
|---------|---|------------------|
| YES     | 1 | Yes              |
| NO      | 2 | No               |
| NOTDONE | 8 | Unable to assess |

**EXM\_11**      **EXM\_HEARLEFT34\_MSP**

**[ASK IF EXM\_HEARLEFT76\_MSP = NO]**

Was the participant able to correctly repeat the word or number you whispered at a distance of 15cm in their left ear??

**CODE ONLY ONE RESPONSE**

|         |   |                  |
|---------|---|------------------|
| YES     | 1 | Yes              |
| NO      | 2 | No               |
| NOTDONE | 8 | Unable to assess |

**EXM\_12**      **EXM\_HEARLEFT56\_MSP**

**[ASK IF EXM\_HEARLEFT34\_MSP = NO]**

Was the participant able to correctly repeat back the word or number you spoke using a conversational volume at a distance of 15cm in their left ear??

**CODE ONLY ONE RESPONSE**

|         |   |                  |
|---------|---|------------------|
| YES     | 1 | Yes              |
| NO      | 2 | No               |
| NOTDONE | 8 | Unable to assess |

**EXM\_13**      **EXAM\_HEARNOTES\_MSP**

**[ALWAYS ASK]**

Do you have any additional notes to include regarding the participant's hearing?

|     |   |     |
|-----|---|-----|
| YES | 1 | Yes |
| NO  | 2 | No  |

**EXM\_14**      **EXAM\_HEARNOTES\_SP\_MSP**

**[ASK IF EXAM\_HEAR\_NOTES\_MSP = YES]**

**CLINICIAN NOTE:** Please do not enter any identifying information in this section.

Please provide any notes below:

**EXM\_15**      **EXM\_SMELL\_MSP**

**[ALWAYS ASK]**

Is the participant's sense of smell normal or abnormal?

**CODE ONLY ONE RESPONSE**

|        |   |          |
|--------|---|----------|
| NRM    | 1 | Normal   |
| ABNRM  | 2 | Abnormal |
| UNSURE | 7 | Unsure   |

**EXM\_16**      **EXM\_FOCAL\_MSP**

**[ALWAYS ASK]**

Are there any focal/lateralizing neurological findings to note?

| <b>MULTIPLE RESPONSES ALLOWED, CODE ALL THAT APPLY (EXCEPT IF 96 IS SELECTED)</b> |    |                                 |
|-----------------------------------------------------------------------------------|----|---------------------------------|
| VIS                                                                               | 01 | Visual field defect             |
| EXT                                                                               | 02 | Abnormal extra-ocular movements |
| RGD                                                                               | 03 | Rigidity                        |
| WKN                                                                               | 04 | Weakness                        |
| SP                                                                                | 05 | Speech                          |
| NONE                                                                              | 96 | None                            |
| OTSP                                                                              | 97 | Other: Please specify:          |

|                                          |                            |
|------------------------------------------|----------------------------|
| <b>EXM_17</b>                            | <b>EXM_FOCALVIS_SP_MSP</b> |
| <b>[ASK IF EXAM_FOCAL_MSP = VIS]</b>     |                            |
| Please describe the visual field defect: |                            |
| Open text: _____                         |                            |

|                                                      |                            |
|------------------------------------------------------|----------------------------|
| <b>EXM_18</b>                                        | <b>EXM_FOCALEXT_SP_MSP</b> |
| <b>[ASK IF EXAM_FOCAL_MSP = EXT]</b>                 |                            |
| Please describe the abnormal extra-ocular movements: |                            |
| Open text: _____                                     |                            |

|                                                           |                            |
|-----------------------------------------------------------|----------------------------|
| <b>EXM_19</b>                                             | <b>EXM_FOCALRGD_SP_MSP</b> |
| <b>[ASK IF EXAM_FOCAL_MSP = RGD]</b>                      |                            |
| Please describe the rigidity observed in the participant: |                            |
| Open text: _____                                          |                            |

|                                                           |                            |
|-----------------------------------------------------------|----------------------------|
| <b>EXM_20</b>                                             | <b>EXM_FOCALWKN_SP_MSP</b> |
| <b>[ASK IF EXAM_FOCAL_MSP = WKN]</b>                      |                            |
| Please describe the weakness observed in the participant: |                            |

Open text: \_\_\_\_\_

**EXM\_21**      **EXM\_FOCALSP\_SP\_MSP**

**[ASK IF EXAM\_FOCAL\_MSP = SP]**

Please describe the speech abnormalities observed in the participant:

Open text: \_\_\_\_\_

**EXM\_22**      **EXM\_FOCALOTSP\_SP\_MSP**

**[ASK IF EXAM\_FOCAL\_MSP = OTSP]**

Please describe any other abnormalities observed in the participant:

Open text: \_\_\_\_\_

**EXM\_23**      **EXM\_EXPYR\_MSP**

**[ALWAYS ASK]**

Are there any extrapyramidal signs observed?

**MULTIPLE RESPONSES ALLOWED (EXCEPT IF 96 IS SELECTED), CODE ALL THAT APPLY**

|      |    |                |
|------|----|----------------|
| TRM  | 01 | Tremor         |
| RGD  | 02 | Rigidity       |
| BKN  | 03 | Bradykinesia   |
| PST  | 04 | Posture        |
| NONE | 96 | None           |
| OTSP | 97 | Other: specify |

**EXM\_24**      **EXM\_EXPYRNOTES\_MSP**

**[ASK IF EXM\_EXPYR\_MSP = TRM, RGD, BKN, or PST]**

Please describe the extrapyramidal signs if required.



|                  |   |                                             |
|------------------|---|---------------------------------------------|
| Open text: _____ |   |                                             |
| DK_NA            | 8 | <b>[DO NOT READ]</b> Don't know / No answer |

|                                                                                 |                       |          |
|---------------------------------------------------------------------------------|-----------------------|----------|
| <b>EXM_25</b>                                                                   | <b>EXM_TRANSF_MSP</b> |          |
| <b>[ALWAYS ASK]</b>                                                             |                       |          |
| How would you evaluate the participant's ability to do a sit to stand transfer? |                       |          |
| <b>CODE ONLY ONE RESPONSE</b>                                                   |                       |          |
| NRM                                                                             | 1                     | Normal   |
| ABNRM                                                                           | 2                     | Abnormal |
| UNSURE                                                                          | 7                     | Unsure   |

|                                                                                                                                                                                                                                                                                                                                                                                                                                                                                                                                                                                                 |                        |                  |
|-------------------------------------------------------------------------------------------------------------------------------------------------------------------------------------------------------------------------------------------------------------------------------------------------------------------------------------------------------------------------------------------------------------------------------------------------------------------------------------------------------------------------------------------------------------------------------------------------|------------------------|------------------|
| <b>EXM_26</b>                                                                                                                                                                                                                                                                                                                                                                                                                                                                                                                                                                                   | <b>EXM_BALANCE_MSP</b> |                  |
| <b>[ALWAYS ASK]</b>                                                                                                                                                                                                                                                                                                                                                                                                                                                                                                                                                                             |                        |                  |
| How would you evaluate the participant's stability using the Romberg test?                                                                                                                                                                                                                                                                                                                                                                                                                                                                                                                      |                        |                  |
| <b>CLINICIAN NOTES:</b> The Romberg test requires that the participant removes their shoes. Participants will be asked to stand with their feet together on a flat, hard surface. The participant will be asked to cross their arms in front of their body or place them at their sides. The participant will be asked to stand still and keep their eyes open for approximately 30 seconds while the examining clinician observes. The participant will then be asked to close their eyes and stand for an addition 30 seconds. The examining clinician will assess body movement and balance. |                        |                  |
| <b>CODE ONLY ONE RESPONSE</b>                                                                                                                                                                                                                                                                                                                                                                                                                                                                                                                                                                   |                        |                  |
| NRM                                                                                                                                                                                                                                                                                                                                                                                                                                                                                                                                                                                             | 1                      | Normal           |
| ABNRM                                                                                                                                                                                                                                                                                                                                                                                                                                                                                                                                                                                           | 2                      | Abnormal         |
| NOTDONE                                                                                                                                                                                                                                                                                                                                                                                                                                                                                                                                                                                         | 8                      | Unable to assess |

|                                                      |                        |  |
|------------------------------------------------------|------------------------|--|
| <b>EXM_27</b>                                        | <b>EXM_GAITSPD_MSP</b> |  |
| <b>[ALWAYS ASK]</b>                                  |                        |  |
| Does the participant have normal or slow gait speed? |                        |  |

**CLINICIAN NOTES:** Gait speed may be evaluated by watching the participant move around the Data Collection Site.

**CODE ONLY ONE RESPONSE**

|         |   |                  |
|---------|---|------------------|
| NRM     | 1 | Normal           |
| SLOW    | 2 | Slow             |
| NOTDONE | 8 | Unable to assess |

**EXM\_28**      **EXM\_GAIT\_MSP**

**[ALWAYS ASK]**

Did you observe any gait abnormalities?

**MULTIPLE RESPONSES ALLOWED (EXCEPT IF 96 ISSELECTED), CODE ALL THAT APPLY**

|         |    |                                                                  |
|---------|----|------------------------------------------------------------------|
| NO      | 01 | No gait abnormalities                                            |
| NN      | 02 | Abnormal gait speed due to non-neurologic cause (e.g. arthritis) |
| ST      | 03 | Unsteady                                                         |
| FR      | 04 | Frontal                                                          |
| HM      | 05 | Hemiparetic                                                      |
| NR      | 06 | Neuropathic                                                      |
| AT      | 07 | Ataxic                                                           |
| PK      | 08 | Parkinsonian                                                     |
| SP      | 09 | Spastic                                                          |
| NOTDONE | 96 | Unable to assess                                                 |

**EXM\_29**      **EXM\_BALGAITNOTES\_MSP**

**[ASK IF EXM\_TRANSF\_MSP = ABNRM, OR EXM\_BALANCE\_MSP = ABNRM, OR EXM\_GAITSPD\_MSP = SLOW, OR EXM\_GAITMSP = NN, ST, FR, HM, NR, AT, PK, or SP]**

Please describe any abnormalities in transferring, balance, or gait.

**EXM\_30**      **EXM\_NOTES\_MSP**

**[ALWAYS ASK]**

Do you have any additional notes to include for this module? For example, are there any other findings from the physical examination that should be taken into account when interpreting the results of the cognitive testing?

|     |   |     |
|-----|---|-----|
| YES | 1 | Yes |
|-----|---|-----|

1  
2  
3  
4  
5  
6  
7  
8  
9  
10  
11  
12  
13  
14  
15  
16  
17  
18  
19  
20  
21  
22  
23  
24  
25  
26  
27  
28  
29  
30  
31  
32  
33  
34  
35  
36  
37  
38  
39  
40  
41  
42  
43  
44  
45  
46  
47  
48  
49  
50  
51  
52  
53  
54  
55  
56  
57  
58  
59  
60

|    |   |    |
|----|---|----|
| NO | 2 | No |
|----|---|----|

|                                                                                         |                         |
|-----------------------------------------------------------------------------------------|-------------------------|
| <b>EXM_31</b>                                                                           | <b>EXM_NOTES_SP_MSP</b> |
| <b>[ASK IF EXM_NOTES_MSP = YES]</b>                                                     |                         |
| <b>CLINICIAN NOTE:</b> Please do not enter any identifying information in this section. |                         |
| Please provide any notes below:                                                         |                         |

**EXM\_END**

For peer review only

## Montreal Cognitive Assessment (MoCA)

Training and certification is required by any clinical, health professional, or worker who wishes to administer, score and interpret the Montreal Cognitive Assessment (MoCA) test. The MoCA © may be used, reproduced, and distributed **WITH** permission for universities/foundations/health professionals/hospitals/clinics/public health institutes.

|                 |                                                                                                                                                                                                                                                                                                                                                                                                                                                                                                                                                                                                                                                                                                                                                                                                                                                                                                                                                                                                                                                                                                                                                                                                                                                                                                                                                                                                                                                                                                                                                                                                                                                                                                                                                                                                                                                                                                                                                                                                                                                                                                                                                |
|-----------------|------------------------------------------------------------------------------------------------------------------------------------------------------------------------------------------------------------------------------------------------------------------------------------------------------------------------------------------------------------------------------------------------------------------------------------------------------------------------------------------------------------------------------------------------------------------------------------------------------------------------------------------------------------------------------------------------------------------------------------------------------------------------------------------------------------------------------------------------------------------------------------------------------------------------------------------------------------------------------------------------------------------------------------------------------------------------------------------------------------------------------------------------------------------------------------------------------------------------------------------------------------------------------------------------------------------------------------------------------------------------------------------------------------------------------------------------------------------------------------------------------------------------------------------------------------------------------------------------------------------------------------------------------------------------------------------------------------------------------------------------------------------------------------------------------------------------------------------------------------------------------------------------------------------------------------------------------------------------------------------------------------------------------------------------------------------------------------------------------------------------------------------------|
| <b>Overview</b> | <p>The Montreal Cognitive Assessment (MoCA) was designed as a rapid screening instrument for mild cognitive dysfunction. It assesses different cognitive domains: attention and concentration, executive functions, memory, language, visuoconstructional skills, conceptual thinking, calculations, and orientation. Time to administer the MoCA is approximately 10 minutes. The total possible score is 30 points; a score of 26 or above is considered normal. There is an additional point added to the obtained score if the person being tested has 12 or fewer years of formal education. For the purposes of the CLSA Memory Study, we will categorize participant that did not graduate from secondary school or those who graduated secondary school but did not complete post-secondary education as having 12 or fewer years of formal education.</p> <p>The MoCA memory section provides two trials to learn a word list of five nouns followed by a delay in which subjects are asked questions from other sections of the MoCA (i.e., attention, sentence repetition, letter fluency, similarities). The delay is variable, but estimated at five minutes followed by free recall of the 5-word list. This is followed by a category-cued semantic recall condition, and, finally, a multiple choice-cued recall from presentation of the correct item paired with two items within the same category but not on the list. Only the points earned in the delayed <i>free</i> recall condition of the memory section (1 point per correct word) are added to the MoCA total score. The MoCA-MIS includes points for the free recall condition and the cued conditions (3 points for each word on free recall, 2 for each on category-cued recall, 1 for each on multiple-choice recall).</p> <p>For those with severe visual impairment, the MoCA-BLIND can be utilized. This is scored out of 22 with normal being a score of 18 or higher. The correction for limited formal education described above is also used for the MoCA-BLIND.</p> <p>Clinicians are expected to complete this module using the provided script.</p> |
|-----------------|------------------------------------------------------------------------------------------------------------------------------------------------------------------------------------------------------------------------------------------------------------------------------------------------------------------------------------------------------------------------------------------------------------------------------------------------------------------------------------------------------------------------------------------------------------------------------------------------------------------------------------------------------------------------------------------------------------------------------------------------------------------------------------------------------------------------------------------------------------------------------------------------------------------------------------------------------------------------------------------------------------------------------------------------------------------------------------------------------------------------------------------------------------------------------------------------------------------------------------------------------------------------------------------------------------------------------------------------------------------------------------------------------------------------------------------------------------------------------------------------------------------------------------------------------------------------------------------------------------------------------------------------------------------------------------------------------------------------------------------------------------------------------------------------------------------------------------------------------------------------------------------------------------------------------------------------------------------------------------------------------------------------------------------------------------------------------------------------------------------------------------------------|

|                                                                                                                                                        |                      |     |
|--------------------------------------------------------------------------------------------------------------------------------------------------------|----------------------|-----|
| <b>MOC_1</b>                                                                                                                                           | <b>MOC_SIGHT_MSP</b> |     |
| <b>[ALWAYS ASK]</b>                                                                                                                                    |                      |     |
| Does the participant have any visual impairments that would prevent them from completing the standard MoCA which requires drawing on a piece of paper? |                      |     |
| YES                                                                                                                                                    | 1                    | Yes |
| NO                                                                                                                                                     | 2                    | No  |

### 1. Alternating Trail Making:

**Administration:** The examiner instructs the subject: "Please draw a line, going from a number to a letter in ascending order. Begin here [point to (1)] and draw a line from 1 then to A then to 2 and so on. End here [point to (E)]."

|                                                                                                                                                                                                                |                      |                                                     |
|----------------------------------------------------------------------------------------------------------------------------------------------------------------------------------------------------------------|----------------------|-----------------------------------------------------|
| <b>MOC_2</b>                                                                                                                                                                                                   | <b>MOC_TRAIL_MSP</b> |                                                     |
| <b>[ASK IF MOC_SIGHT_MSP = NO]</b>                                                                                                                                                                             |                      |                                                     |
| Was the participant able to successfully complete the Alternating Trail Making task?                                                                                                                           |                      |                                                     |
| <b>CLINICIAN NOTE:</b> Successfully completing the Alternating Trail Making task required the participant to successfully draw the following pattern: 1-A-2-B-3-C-4-D-5-E without drawing any lines that cross |                      |                                                     |
| <b>CODE ONLY ONE RESPONSE</b>                                                                                                                                                                                  |                      |                                                     |
| YES                                                                                                                                                                                                            | 1                    | Yes                                                 |
| NO                                                                                                                                                                                                             | 2                    | No                                                  |
| REFUSED                                                                                                                                                                                                        | 9                    | <b>[DO NOT READ]</b> Participant refused to do task |

### **2. Visuoconstructional Skills (Cube):**

**Administration:** The examiner gives the following instructions, pointing to the cube: "Copy this drawing as accurately as you can, in the space below".

|                                                                                                                                                                                                                                         |                     |                                                     |
|-----------------------------------------------------------------------------------------------------------------------------------------------------------------------------------------------------------------------------------------|---------------------|-----------------------------------------------------|
| <b>MOC_3</b>                                                                                                                                                                                                                            | <b>MOC_CUBE_MSP</b> |                                                     |
| <b>[ASK IF MOC_SIGHT_MSP = NO]</b>                                                                                                                                                                                                      |                     |                                                     |
| Was the participant able to successfully complete the cube drawing task?                                                                                                                                                                |                     |                                                     |
| <b>CODE ONLY ONE RESPONSE</b>                                                                                                                                                                                                           |                     |                                                     |
| <b>CLINICIAN NOTE:</b> A successfully executed drawing must be:                                                                                                                                                                         |                     |                                                     |
| <ul style="list-style-type: none"> <li>x Three-dimensional</li> <li>x All lines are drawn</li> <li>x No line is added</li> <li>x Lines are relatively parallel and their length is similar (rectangular prisms are accepted)</li> </ul> |                     |                                                     |
| If any of the above criteria are not met, the cube was not successfully drawn.                                                                                                                                                          |                     |                                                     |
| YES                                                                                                                                                                                                                                     | 1                   | Yes                                                 |
| NO                                                                                                                                                                                                                                      | 2                   | No                                                  |
| REFUSED                                                                                                                                                                                                                                 | 9                   | <b>[DO NOT READ]</b> Participant refused to do task |

### **3. Visuoconstructional Skills (Clock):**

**Administration:** Indicate the right third of the space and give the following instructions: “Draw a clock. Put in all the numbers and set the time to 10 past 11”.

|                                                                                                                                                                                                                                      |                         |                                                     |
|--------------------------------------------------------------------------------------------------------------------------------------------------------------------------------------------------------------------------------------|-------------------------|-----------------------------------------------------|
| <b>MOC_4</b>                                                                                                                                                                                                                         | <b>MOC_CLOCKCON_MSP</b> |                                                     |
| <b>[ASK IF MOC_SIGHT_MSP = NO]</b>                                                                                                                                                                                                   |                         |                                                     |
| Contour - Did the participant successfully draw the circle of the clock?                                                                                                                                                             |                         |                                                     |
| <b>CLINICIAN NOTE:</b> For contour, a clock that has been correctly drawn must meet the following criteria: The clock face must be a circle with only minor distortion acceptable (e.g., slight imperfection on closing the circle). |                         |                                                     |
| <b>CODE ONLY ONE RESPONSE</b>                                                                                                                                                                                                        |                         |                                                     |
| YES                                                                                                                                                                                                                                  | 1                       | Yes                                                 |
| NO                                                                                                                                                                                                                                   | 2                       | No                                                  |
| REFUSED                                                                                                                                                                                                                              | 9                       | <b>[DO NOT READ]</b> Participant refused to do task |

|                                                                                                                                                                                                                                                                                                                                                                |                         |                                                     |
|----------------------------------------------------------------------------------------------------------------------------------------------------------------------------------------------------------------------------------------------------------------------------------------------------------------------------------------------------------------|-------------------------|-----------------------------------------------------|
| <b>MOC_5</b>                                                                                                                                                                                                                                                                                                                                                   | <b>MOC_CLOCKNUM_MSP</b> |                                                     |
| <b>[ASK IF MOC_SIGHT_MSP = NO]</b>                                                                                                                                                                                                                                                                                                                             |                         |                                                     |
| Numbers – Did the participant successfully draw the numbers on the clock?                                                                                                                                                                                                                                                                                      |                         |                                                     |
| <b>CLINICIAN NOTE:</b> For the numbers, a clock that has been correctly drawn must meet the following criteria: All clock numbers must be present with no additional numbers; numbers must be in the correct order and placed in the approximate quadrants on the clock face; Roman numerals are acceptable; numbers can be placed outside the circle contour. |                         |                                                     |
| <b>CODE ONLY ONE RESPONSE</b>                                                                                                                                                                                                                                                                                                                                  |                         |                                                     |
| YES                                                                                                                                                                                                                                                                                                                                                            | 1                       | Yes                                                 |
| NO                                                                                                                                                                                                                                                                                                                                                             | 2                       | No                                                  |
| REFUSED                                                                                                                                                                                                                                                                                                                                                        | 9                       | <b>[DO NOT READ]</b> Participant refused to do task |

|                                    |                          |  |
|------------------------------------|--------------------------|--|
| <b>MOC_6</b>                       | <b>MOC_CLOCKHAND_MSP</b> |  |
| <b>[ASK IF MOC_SIGHT_MSP = NO]</b> |                          |  |

|                                                                                                                                                                                                                                                                                                                                   |   |                                                     |
|-----------------------------------------------------------------------------------------------------------------------------------------------------------------------------------------------------------------------------------------------------------------------------------------------------------------------------------|---|-----------------------------------------------------|
| Hands - Did the participant successfully draw the hands on the clock?                                                                                                                                                                                                                                                             |   |                                                     |
| <b>CODE ONLY ONE RESPONSE</b>                                                                                                                                                                                                                                                                                                     |   |                                                     |
| <b>CLINICIAN NOTE:</b> For the hands, a clock that has been correctly drawn must meet the following criteria: There must be two hands jointly indicating the correct time; the hour hand must be clearly shorter than the minute hand; hands must be centred within the clock face with their junction close to the clock centre. |   |                                                     |
| YES                                                                                                                                                                                                                                                                                                                               | 1 | Yes                                                 |
| NO                                                                                                                                                                                                                                                                                                                                | 2 | No                                                  |
| REFUSED                                                                                                                                                                                                                                                                                                                           | 9 | <b>[DO NOT READ]</b> Participant refused to do task |

#### **4. Naming:**

Administration: Beginning on the left, point to each figure and say: "Tell me the name of this animal".

|                                                                                                                                  |                 |                                                     |
|----------------------------------------------------------------------------------------------------------------------------------|-----------------|-----------------------------------------------------|
| MOC_7                                                                                                                            | MOC_ANIMALS_MSP |                                                     |
| <b>[ASK IF MOC_SIGHT_MSP = NO]</b>                                                                                               |                 |                                                     |
| How many animals were correctly named by the participant?                                                                        |                 |                                                     |
| <b>CLINICIAN NOTES:</b> One point is given for the following responses: (1) lion (2) rhinoceros or rhino (3) camel or dromedary. |                 |                                                     |
| <b>CODE ONLY ONE RESPONSE</b>                                                                                                    |                 |                                                     |
| ONE                                                                                                                              | 1               | One                                                 |
| TWO                                                                                                                              | 2               | Two                                                 |
| THREE                                                                                                                            | 3               | Three                                               |
| NONE                                                                                                                             | 4               | None of the animals were correctly named            |
| REFUSED                                                                                                                          | 9               | <b>[DO NOT READ]</b> Participant refused to do task |

#### **5. Memory:**

Administration: The examiner reads a list of 5 words at a rate of one per second, giving the following instructions: "This is a memory test. I am going to read a list of words that you will have to remember now"

1  
2  
3 *and later on. Listen carefully. When I am through, tell me as many words as you can remember. It doesn't*  
4 *matter in what order you say them".*  
5

6 "Face, velvet, church, daisy, red"  
7

8 Administration: When the subject indicates that (s)he has finished (has recalled all words), or can recall  
9 no more words, read the list a second time with the following instructions: "*I am going to read the same*  
10 *list for a second time. Try to remember and tell me as many words as you can, including words you said*  
11 *the first time.*"

12 "Face, velvet, church, daisy, red"  
13

14 Administration: At the end of the second trial, inform the participant that he/she will be asked to recall  
15 these words again by saying: "*I will ask you to recall these words again at the end of the test.*"  
16

### 17 **6. Attention:**

18  
19 Forward Digit Span: Administration: Give the following instruction: "*I am going to say some numbers and*  
20 *when I am through, repeat them to me exactly as I said them".* Read the five number sequence at the rate  
21 of one digit per second.  
22

23 "2, 1, 8, 5, 4"  
24

|                                                                                      |                 |                                                     |
|--------------------------------------------------------------------------------------|-----------------|-----------------------------------------------------|
| MOC_8                                                                                | MOC_NUMFORW_MSP |                                                     |
| <b>[ALWAYS ASK]</b>                                                                  |                 |                                                     |
| Was the participant able to repeat the numbers "2, 1, 8, 5, 4" in the forward order? |                 |                                                     |
| <b>CODE ONLY ONE RESPONSE</b>                                                        |                 |                                                     |
| YES                                                                                  | 1               | Yes                                                 |
| NO                                                                                   | 2               | No                                                  |
| REFUSED                                                                              | 9               | <b>[DO NOT READ]</b> Participant refused to do task |

25  
26  
27  
28  
29  
30  
31  
32  
33  
34  
35  
36  
37  
38  
39 Attention, Backward Digit Span: Administration: Give the following instruction: "*Now I am going to say*  
40 *some more numbers, but when I am through you must repeat them to me in the backwards order.*"  
41

42 "7, 4, 2."  
43

|                                                                                 |                 |                                                     |
|---------------------------------------------------------------------------------|-----------------|-----------------------------------------------------|
| MOC_9                                                                           | MOC_NUMBACK_MSP |                                                     |
| <b>[ALWAYS ASK]</b>                                                             |                 |                                                     |
| Was the participant able to repeat the numbers "7, 4, 2" in the backward order? |                 |                                                     |
| <b>CODE ONLY ONE RESPONSE</b>                                                   |                 |                                                     |
| YES                                                                             | 1               | Yes                                                 |
| NO                                                                              | 2               | No                                                  |
| REFUSED                                                                         | 9               | <b>[DO NOT READ]</b> Participant refused to do task |



**Vigilance:** The examiner reads the list of letters at a rate of one per second, after giving the following instruction: “I am going to read a sequence of letters. Every time I say the letter A, tap your hand once. If a say a different letter, do not tap your hand”.

“F B A C M N A A J K L B A F A K D E A A A J A M O F A A B”

|                                                                                                                    |                       |                                                     |
|--------------------------------------------------------------------------------------------------------------------|-----------------------|-----------------------------------------------------|
| <b>MOC_10</b>                                                                                                      | <b>MOC_LETTER_MSP</b> |                                                     |
| <b>[ALWAYS ASK]</b>                                                                                                |                       |                                                     |
| Did the participant make zero to one errors (an error is a tap on a wrong letter or a failure to tap on letter A)? |                       |                                                     |
| <b>CODE ONLY ONE RESPONSE</b>                                                                                      |                       |                                                     |
| YES                                                                                                                | 1                     | Yes, the participant made 0 or one errors           |
| NO                                                                                                                 | 2                     | No, the participant made two or more errors         |
| REFUSED                                                                                                            | 9                     | <b>[DO NOT READ]</b> Participant refused to do task |

**Serial 7s:** The examiner gives the following instruction: “Now, I will ask you to count by subtracting seven from 100, and then, keep subtracting seven from your answer until I tell you to stop”. Give this instruction twice if necessary.

|                                                                                                                                                                                                                                                                                                                                                                                                                                                                                                                                                                                                                                                                                                                                                                  |                     |                                                     |
|------------------------------------------------------------------------------------------------------------------------------------------------------------------------------------------------------------------------------------------------------------------------------------------------------------------------------------------------------------------------------------------------------------------------------------------------------------------------------------------------------------------------------------------------------------------------------------------------------------------------------------------------------------------------------------------------------------------------------------------------------------------|---------------------|-----------------------------------------------------|
| <b>MOC_11</b>                                                                                                                                                                                                                                                                                                                                                                                                                                                                                                                                                                                                                                                                                                                                                    | <b>MOC_SUBS_MSP</b> |                                                     |
| <b>[ALWAYS ASK]</b>                                                                                                                                                                                                                                                                                                                                                                                                                                                                                                                                                                                                                                                                                                                                              |                     |                                                     |
| How many correct subtractions did the participant make?                                                                                                                                                                                                                                                                                                                                                                                                                                                                                                                                                                                                                                                                                                          |                     |                                                     |
| <b>CLINICIAN NOTES:</b> This item is scored out of 3 points. Give no (0) points for no correct subtractions, 1 point for one correct subtraction, 2 points for two-to-three correct subtractions, and 3 points if the participant successfully makes four or five correct subtractions. Count each correct subtraction of 7 beginning at 100. Each subtraction is evaluated independently; that is, if the participant responds with an incorrect number but continues to correctly subtract 7 from it, give a point for each correct subtraction. For example, a participant may respond “92 – 85 – 78 – 71 – 64” where the “92” is incorrect, but all subsequent numbers are subtracted correctly. This is one error and the item would be given a score of 3. |                     |                                                     |
| <b>CODE ONLY ONE RESPONSE</b>                                                                                                                                                                                                                                                                                                                                                                                                                                                                                                                                                                                                                                                                                                                                    |                     |                                                     |
| ZERO                                                                                                                                                                                                                                                                                                                                                                                                                                                                                                                                                                                                                                                                                                                                                             | 0                   | Zero                                                |
| ONE                                                                                                                                                                                                                                                                                                                                                                                                                                                                                                                                                                                                                                                                                                                                                              | 1                   | One                                                 |
| TWO_THREE                                                                                                                                                                                                                                                                                                                                                                                                                                                                                                                                                                                                                                                                                                                                                        | 2                   | Two or three                                        |
| FOUR_FIVE                                                                                                                                                                                                                                                                                                                                                                                                                                                                                                                                                                                                                                                                                                                                                        | 3                   | Four or five                                        |
| REFUSED                                                                                                                                                                                                                                                                                                                                                                                                                                                                                                                                                                                                                                                                                                                                                          | 9                   | <b>[DO NOT READ]</b> Participant refused to do task |

## 7. Sentence repetition:

**Administration:** The examiner gives the following instructions: “I am going to read you a sentence. Repeat it after me, exactly as I say it [pause]: I only know that John is the one to help today.”. Following the response, say: “Now I am going to read you another sentence. Repeat it after me, exactly as I say it [pause]: The cat always hid under the couch when dogs were in the room”.

|                                                                                                                                                                                                                                                            |               |                                                     |
|------------------------------------------------------------------------------------------------------------------------------------------------------------------------------------------------------------------------------------------------------------|---------------|-----------------------------------------------------|
| MOC_12                                                                                                                                                                                                                                                     | MOC_REPET_MSP |                                                     |
| <b>[ALWAYS ASK]</b>                                                                                                                                                                                                                                        |               |                                                     |
| How many of the sentences did the participant correctly repeat?                                                                                                                                                                                            |               |                                                     |
| <b>CLINICIAN NOTES:</b> Repetition must be exact. Be alert for errors that are omissions (e.g., omitting "only", "always") and substitutions/additions (e.g., "John is the one who helped today;" substituting "hides" for "hid", altering plurals, etc.). |               |                                                     |
| <b>CODE ONLY ONE RESPONSE</b>                                                                                                                                                                                                                              |               |                                                     |
| ZERO                                                                                                                                                                                                                                                       | 0             | Zero                                                |
| ONE                                                                                                                                                                                                                                                        | 1             | One                                                 |
| TWO                                                                                                                                                                                                                                                        | 2             | Two                                                 |
| REFUSED                                                                                                                                                                                                                                                    | 9             | <b>[DO NOT READ]</b> Participant refused to do task |

## 8. Verbal fluency:

**Administration:** The examiner gives the following instruction: “Tell me as many words as you can think of that begin with a certain letter of the alphabet that I will tell you in a moment. You can say any kind of word you want, except for proper nouns (like Bob or Boston), numbers, or words that begin with the same sound but have a different suffix, for example, love, lover, loving. I will tell you to stop after one minute. Are you ready? [Pause] Now, tell me as many words as you can think of that begin with the letter F. [time for 60 sec]. Stop.”

|                                                   |                |                                                     |
|---------------------------------------------------|----------------|-----------------------------------------------------|
| MOC_13                                            | MOC_WORDSF_MSP |                                                     |
| <b>[ALWAYS ASK]</b>                               |                |                                                     |
| Please record the words that the participant says |                |                                                     |
|                                                   |                |                                                     |
| REFUSED                                           | 9              | <b>[DO NOT READ]</b> Participant refused to do task |

|                                                                                      |                   |                                              |
|--------------------------------------------------------------------------------------|-------------------|----------------------------------------------|
| MOC_14                                                                               | MOC_WORDSFNUM_MSP |                                              |
| [ASK IF MOC_WORDSF ≠ REFUSED ]                                                       |                   |                                              |
| How many words did the participant say in one minute that begin with the letter “F”? |                   |                                              |
| <b>CODE ONLY ONE RESPONSE</b>                                                        |                   |                                              |
| 10_LESS                                                                              | 00                | Less than 11 words                           |
| 11_MORE                                                                              | 01                | 11 or more words                             |
| REFUSED                                                                              | 99                | [DO NOT READ] Participant refused to do task |

### 9. Abstraction:

**Administration:** The examiner asks the subject to explain what each pair of words has in common, starting with the example: “*Tell me how an orange and a banana are alike*”. If the subject answers in a concrete manner, then say only one additional time: “*Tell me another way in which those items are alike*”. If the subject does not give the appropriate response (fruit), say, “*Yes, and they are also both fruit.*” Do not give any additional instructions or clarification. After the practice trial, say: “*Now, tell me how a train and a bicycle are alike*”. Following the response, administer the second trial, saying: “*Now tell me how a ruler and a watch are alike*”. Do not give any additional instructions or prompts.

|                                                                                                                                                                                                                                                                                                                                                                                                                        |                 |                                              |
|------------------------------------------------------------------------------------------------------------------------------------------------------------------------------------------------------------------------------------------------------------------------------------------------------------------------------------------------------------------------------------------------------------------------|-----------------|----------------------------------------------|
| MOC_15                                                                                                                                                                                                                                                                                                                                                                                                                 | MOC_WORDSIM_MSP |                                              |
| [ALWAYS ASK]                                                                                                                                                                                                                                                                                                                                                                                                           |                 |                                              |
| How many combinations of words did the participant identify the similarity between?                                                                                                                                                                                                                                                                                                                                    |                 |                                              |
| <b>CLINICIAN NOTES:</b> Only the last two item pairs are scored. Give 1 point to each item pair correctly answered. The following responses are acceptable: Train-bicycle = means of transportation, means of travelling, you take trips in both; Ruler-watch = measuring instruments, used to measure. The following responses are not acceptable: Train-bicycle = they have wheels; Ruler-watch = they have numbers. |                 |                                              |
| <b>CODE ONLY ONE RESPONSE</b>                                                                                                                                                                                                                                                                                                                                                                                          |                 |                                              |
| NONE                                                                                                                                                                                                                                                                                                                                                                                                                   | 0               | None                                         |
| ONE                                                                                                                                                                                                                                                                                                                                                                                                                    | 1               | One                                          |
| TWO                                                                                                                                                                                                                                                                                                                                                                                                                    | 2               | Two                                          |
| REFUSED                                                                                                                                                                                                                                                                                                                                                                                                                | 9               | [DO NOT READ] Participant refused to do task |

**10. Delayed recall:**

**Administration:** The examiner gives the following instruction: "I read some words to you earlier, which I asked you to remember. Tell me as many of those words as you can remember."

|                                                                                           |                     |                                                     |
|-------------------------------------------------------------------------------------------|---------------------|-----------------------------------------------------|
| <b>MOC_16</b>                                                                             | <b>MOC_MEM3_MSP</b> |                                                     |
| <b>[ALWAYS ASK]</b>                                                                       |                     |                                                     |
| .Please record which words the participant is able to spontaneously recall.               |                     |                                                     |
| <b>MULTIPLE RESPONSES ALLOWED (EXCEPT IF 96, OR 99 ARE SELECTED), CODE ALL THAT APPLY</b> |                     |                                                     |
| FACE                                                                                      | 01                  | Face                                                |
| VELVET                                                                                    | 02                  | Velvet                                              |
| CHURCH                                                                                    | 03                  | Church                                              |
| DAISY                                                                                     | 04                  | Daisy                                               |
| RED                                                                                       | 05                  | Red                                                 |
| NONE                                                                                      | 96                  | Did not remember any of the words                   |
| REFUSED                                                                                   | 99                  | <b>[DO NOT READ]</b> Participant refused to do task |

**10b. Delayed recall – optional component:**

**Administration:** Following the delayed free recall trial, prompt the subject with the semantic category cue provided below for any word not recalled. Prompt all non-recalled words in this manner.

| <b>Word</b> | <b>Category cue</b> |
|-------------|---------------------|
| Face        | Part of the body    |
| Velvet      | Type of fabric      |
| Church      | Type of building    |
| Daisy       | Type of flower      |
| Red         | A colour            |

|               |                        |
|---------------|------------------------|
| <b>MOC_17</b> | <b>MOC_MISCUE1_MSP</b> |
|---------------|------------------------|

**[SKIP IF MOC\_MEM3\_MSP = FACE AND VELVET AND CHURCH AND DAISY AND RED]**

Please indicate which words the participant produces on this third trial.

**CLINICIAN NOTE:** Please select each word that the participant correctly recalled with the category cue provided. Do not select words that the participant correctly remembered spontaneously.

A cue is used for clinical information purposes only and can give the test interpreter additional information about the type of memory disorder. For memory deficits due to retrieval failures, performance can be improved with a cue. For memory deficits due to encoding failures, performance does not improve with a cue.

**MULTIPLE RESPONSES ALLOWED (EXCEPT IF 96 OR 99 ARE SELECTED), CODE ALL THAT APPLY**

|         |    |                                                     |
|---------|----|-----------------------------------------------------|
| FACE    | 01 | Face                                                |
| VELVET  | 02 | Velvet                                              |
| CHURCH  | 03 | Church                                              |
| DAISY   | 04 | Daisy                                               |
| RED     | 05 | Red                                                 |
| NONE    | 96 | Did not remember any of the words                   |
| REFUSED | 99 | <b>[DO NOT READ]</b> Participant refused to do task |

If the subject does not recall the word after the category cue, give him/her a multiple choice trial, using the following example instruction, "Which of the following words do you think it was, NOSE, FACE, or HAND?"

| Word   | Multiple choice cue      |
|--------|--------------------------|
| Face   | Nose, face, hand         |
| Velvet | Denim, cotton, velvet    |
| Church | Church, school, hospital |
| Daisy  | Rose, daisy, tulip       |
| Red    | Red, blue, green         |

**MOC\_18**

**MOC\_MISCUE2\_MSP**

**SKIP IF MOC\_MEM3\_MSP OR MOC\_MISCUE1\_MSP = FACE AND VELVET AND CHURCH AND DAISY AND RED]**

Please indicate which words the participant produces on this third trial.

**CLINICIAN NOTE:** Please select each word that the participant correctly recalled with the category cue provided. Do not select words that the participant correctly remembered spontaneously or using the category cues.

**MULTIPLE RESPONSES ALLOWED (EXCEPT IF 96 OR 99 ARE SELECTED), CODE ALL THAT APPLY**

|         |    |                                                     |
|---------|----|-----------------------------------------------------|
| FACE    | 01 | Face                                                |
| VELVET  | 02 | Velvet                                              |
| CHURCH  | 03 | Church                                              |
| DAISY   | 04 | Daisy                                               |
| RED     | 05 | Red                                                 |
| NONE    | 96 | Did not remember any of the words                   |
| REFUSED | 99 | <b>[DO NOT READ]</b> Participant refused to do task |

### **11. Orientation:**

**Administration:** The examiner gives the following instructions: “*Tell me the date today*”. If the subject does not give a complete answer, then prompt accordingly by saying: “*Tell me the [year, month, exact date, and day of the week].*” Then say: “*Now, tell me the name of this place, and which city it is in.*”

|                                                                                                                                                                                                                |                       |                                                                                   |
|----------------------------------------------------------------------------------------------------------------------------------------------------------------------------------------------------------------|-----------------------|-----------------------------------------------------------------------------------|
| <b>MOC_19</b>                                                                                                                                                                                                  | <b>MOC_ORIENT_MSP</b> |                                                                                   |
| <b>[ALWAYS ASK]</b>                                                                                                                                                                                            |                       |                                                                                   |
| Which of the following orientation features did the participant correctly identify?                                                                                                                            |                       |                                                                                   |
| <b>CLINICIAN NOTES:</b> The subject must tell the exact date and the exact place (name of hospital, clinic, office). No points are allocated if subject makes an error (even of one day) for the day and date. |                       |                                                                                   |
| <b>MULTIPLE RESPONSES ALLOWED (EXCEPT IF 96 OR 99 ARE SELECTED), CODE ALL THAT APPLY</b>                                                                                                                       |                       |                                                                                   |
| DATE                                                                                                                                                                                                           | 01                    | Date                                                                              |
| MONTH                                                                                                                                                                                                          | 02                    | Month                                                                             |
| YEAR                                                                                                                                                                                                           | 03                    | Year                                                                              |
| DAY                                                                                                                                                                                                            | 04                    | Day                                                                               |
| PLACE                                                                                                                                                                                                          | 05                    | Place                                                                             |
| CITY                                                                                                                                                                                                           | 06                    | City                                                                              |
| NONE                                                                                                                                                                                                           | 96                    | None – the participant did not correctly identify any of the orientation features |
| REFUSED                                                                                                                                                                                                        | 99                    | <b>[DO NOT READ]</b> Participant refused to do task                               |

|                                          |                            |  |
|------------------------------------------|----------------------------|--|
| <b>MOC_20</b>                            | <b>MOC_TOTALSCORE0_MSP</b> |  |
| <b>[CALCULATE IF MOC_SIGHT_MSP = NO]</b> |                            |  |

The Montreal Cognitive Assessment (MoCA) is scored out of a maximum of 30 points. A final total score of 26 and above is considered normal. Total score on the MoCA: 0

**CLINICIAN NOTES:** One point has been added for individuals who have 12 years or fewer of formal education.

[CALCULATED VARIABLE: MOC\_TRAIL + MOC\_CUBE + MOC\_CLOCKCON + MOC\_CLOCKNUM + MOC\_CLOCKHAND + MOC\_ANIMALS:ONE + MOC\_ANIMALS:TWO + MOC\_ANIMALS:TWO + MOC\_ANIMALS:THREE + MOC\_ANIMALS:THREE + MOC\_ANIMALS:THREE + MOC\_NUMFORW + MOC\_NUMBACK + MOC\_LETTER:YES + MOC\_SUBS:ONE + \$MOC\_SUBS:TWO\_THREE + MOC\_SUBS:TWO\_THREE + MOC\_SUBS:FOUR\_FIVE + MOC\_SUBS:FOUR\_FIVE + MOC\_SUBS:FOUR\_FIVE + MOC\_REPET:ONE + MOC\_REPET:TWO + MOC\_REPET:TWO + MOC\_WORDSFNUM:11\_MORE + MOC\_WORDSIM:ONE + MOC\_WORDSIM:TWO + MOC\_WORDSIM:TWO + MOC\_MEM3:FACE + MOC\_MEM3:VELVET + MOC\_MEM3:CHURCH + MOC\_MEM3:DAISY + MOC\_MEM3:RED + MOC\_ORIENT:DATE + MOC\_ORIENT:MONTH + MOC\_ORIENT:YEAR + MOC\_ORIENT:DAY + MOC\_ORIENT:PLACE + MOC\_ORIENT:CITY + 1 IF BASELINE EDUCATION WAS 12 YEARS OR LESS == 0]

VARIABLES MOC\_21 TO MOC\_51 SHOULD BE CALCULATED AS FOLLOVED:

**VARIABLE NAME:** MOC\_TOTALSCORE[NUMBER] SHOULD INCREASE SEQUENTIALLY FROM 1 TO 30.

**VARIABLE DESCRIPTION:** TOTAL SCORE ON MONTREAL COGNITIVE ASSESSMENT (MOCA): [NUMBER] SHOULD INCREASE SEQUENTIALLY FROM 1 TO 30.

**VARIABLE CALCULATION:** THE TOTAL SCORE THAT THE VARIABLE CALCULATION EQUALS SHOULD INCREASE SEQUENTIALLY FROM 1 TO 30

|                                                                                                                                                                                                                                                                                                                                                                                                                                                                                                                                                                                                                                                                                                                                                                                                                                                                                                                                                                                                 |                   |
|-------------------------------------------------------------------------------------------------------------------------------------------------------------------------------------------------------------------------------------------------------------------------------------------------------------------------------------------------------------------------------------------------------------------------------------------------------------------------------------------------------------------------------------------------------------------------------------------------------------------------------------------------------------------------------------------------------------------------------------------------------------------------------------------------------------------------------------------------------------------------------------------------------------------------------------------------------------------------------------------------|-------------------|
| MOC_52                                                                                                                                                                                                                                                                                                                                                                                                                                                                                                                                                                                                                                                                                                                                                                                                                                                                                                                                                                                          | MOC_TOTALMIS0_MSP |
| [CALCULATE IF MOC_SIGHT_MSP = NO]                                                                                                                                                                                                                                                                                                                                                                                                                                                                                                                                                                                                                                                                                                                                                                                                                                                                                                                                                               |                   |
| <b>CLINICIAN NOTES:</b> There were not any skipped items on the Montreal Cognitive Assessment (MoCA).                                                                                                                                                                                                                                                                                                                                                                                                                                                                                                                                                                                                                                                                                                                                                                                                                                                                                           |                   |
| [CALCULATED VARIABLE, (\$MOC_TRAIL.refuse()\$ ? 1 : 0) + (\$MOC_CUBE.refuse()\$ ? 1 : 0) + (\$MOC_CLOCKCON.refuse()\$ ? 1 : 0) + (\$MOC_CLOCKNUM.refuse()\$ ? 1 : 0) + \$MOC_CLOCKHAND.refuse()\$ ? 1 : 0) + (\$MOC_ANIMALS.refuse()\$ ? 1 : 0) + \$MOC_ANIMALS.refuse()\$ ? 1 : 0) + (\$MOC_ANIMALS.refuse()\$ ? 1 : 0) + (\$MOC_NUMFORW.refuse()\$ ? 1 : 0) + (\$MOC_NUMBACK.refuse()\$ ? 1 : 0) + (\$MOC_LETTER.refuse()\$ ? 1 : 0) + (\$MOC_SUBS.refuse()\$ ? 1 : 0) + (\$MOC_SUBS.refuse()\$ ? 1 : 0) + (\$MOC_SUBS.refuse()\$ ? 1 : 0) + (\$MOC_REPET.refuse()\$ ? 1 : 0) + (\$MOC_REPET.refuse()\$ ? 1 : 0) + (\$MOC_WORDSFNUM.refuse()\$ ? 1 : 0) + (\$MOC_WORDSIM.refuse()\$ ? 1 : 0) + (\$MOC_WORDSIM.refuse()\$ ? 1 : 0) + (\$MOC_MEM3.refuse()\$ ? 1 : 0) + (\$MOC_MEM3.refuse()\$ ? 1 : 0) + (\$MOC_MEM3.refuse()\$ ? 1 : 0) + (\$MOC_ORIENT.refuse()\$ ? 1 : 0) == 0] |                   |

|                                                                                                                                                                                                                                                                                                                                                               |                   |
|---------------------------------------------------------------------------------------------------------------------------------------------------------------------------------------------------------------------------------------------------------------------------------------------------------------------------------------------------------------|-------------------|
| MOC_53                                                                                                                                                                                                                                                                                                                                                        | MOC_TOTALMIS1_MSP |
| [CALCULATE IF MOC_SIGHT_MSP = NO]                                                                                                                                                                                                                                                                                                                             |                   |
| <b>CLINICIAN NOTES:</b> Not all components of the Montreal Cognitive Assessment (MoCA) may have been completed. This variable identifies the number of points out of the total score of 30 that the participant did not receive due to skipping tasks on the MoCA and should be considered when interpreting the total score of the MoCA. Number of points: 1 |                   |

[CALCULATED VARIABLE, (\$MOC\_TRAIL.refuse()\$ ? 1 : 0) + (\$MOC\_CUBE.refuse()\$ ? 1 : 0) + (\$MOC\_CLOCKCON.refuse()\$ ? 1 : 0) + (\$MOC\_CLOCKNUM.refuse()\$ ? 1 : 0) + \$MOC\_CLOCKHAND.refuse()\$ ? 1 : 0) + (\$MOC\_ANIMALS.refuse()\$ ? 1 : 0) + \$MOC\_ANIMALS.refuse()\$ ? 1 : 0) + (\$MOC\_ANIMALS.refuse()\$ ? 1 : 0) + (\$MOC\_NUMFORW.refuse()\$ ? 1 : 0) + (\$MOC\_NUMBACK.refuse()\$ ? 1 : 0) + (\$MOC\_LETTER.refuse()\$ ? 1 : 0) + (\$MOC\_SUBS.refuse()\$ ? 1 : 0) + (\$MOC\_SUBS.refuse()\$ ? 1 : 0) + (\$MOC\_SUBS.refuse()\$ ? 1 : 0) + (\$MOC\_REPET.refuse()\$ ? 1 : 0) + (\$MOC\_REPET.refuse()\$ ? 1 : 0) + (\$MOC\_WORDSFNUM.refuse()\$ ? 1 : 0) + (\$MOC\_WORDSIM.refuse()\$ ? 1 : 0) + (\$MOC\_WORDSIM.refuse()\$ ? 1 : 0) + (\$MOC\_MEM3.refuse()\$ ? 1 : 0) + (\$MOC\_ORIENT.refuse()\$ ? 1 : 0) == 1]

VARIABLES MOC\_54 TO MOC\_62 SHOULD BE CALCULATED AS FOLLOWED:

**VARIABLE NAME:** MOC\_TOTALMIS[NUMBER] SHOULD INCREASE SEQUENTIALLY FROM 2 TO 10 OR MORE.

**VARIABLE DESCRIPTION:** TOTAL NUMBER OF MISSING POINTS ON MONTREAL COGNITIVE ASSESSMENT (MOCA): [NUMBER] SHOULD INCREASE SEQUENTIALLY FROM 1 TO 10 OR MORE.

**VARIABLE CALCULATION:** THE TOTAL SCORE THAT THE VARIABLE CALCULATION EQUALS SHOULD INCREASE SEQUENTIALLY FROM 1 TO 10 OR MORE

|                                                                                                                                                                                                                                                                                                                                                                                                                                                                                                                                                                                |                     |
|--------------------------------------------------------------------------------------------------------------------------------------------------------------------------------------------------------------------------------------------------------------------------------------------------------------------------------------------------------------------------------------------------------------------------------------------------------------------------------------------------------------------------------------------------------------------------------|---------------------|
| MOC_63                                                                                                                                                                                                                                                                                                                                                                                                                                                                                                                                                                         | MOC_BLINDSCORE0_MSP |
| [CALCULATE IF MOC_SIGHT_MSP = YES]                                                                                                                                                                                                                                                                                                                                                                                                                                                                                                                                             |                     |
| Total score on the Montreal Cognitive Assessment (MoCA) Blind version : 0                                                                                                                                                                                                                                                                                                                                                                                                                                                                                                      |                     |
| <b>CLINICIAN NOTES:</b> One point has been added for individuals who have 12 years or fewer of formal education, for a possible maximum of 22 points. A final total score of 18 and above is considered normal.                                                                                                                                                                                                                                                                                                                                                                |                     |
| [CALCULATED VARIABLE: MOC_NUMFORW + MOC_NUMBACK + MOC_LETTER:YES + MOC_SUBS:ONE + \$MOC_SUBS:TWO_THREE + MOC_SUBS:TWO_THREE + MOC_SUBS:FOUR_FIVE + MOC_SUBS:FOUR_FIVE + MOC_SUBS:FOUR_FIVE + MOC_REPET:ONE + MOC_REPET:TWO + MOC_REPET:TWO + MOC_WORDSFNUM:11_MORE + MOC_WORDSIM:ONE + MOC_WORDSIM:TWO + MOC_WORDSIM:TWO + MOC_MEM3:FACE + MOC_MEM3:VELVET + MOC_MEM3:CHURCH + MOC_MEM3:DAISY + MOC_MEM3:RED + MOC_ORIENT:DATE + MOC_ORIENT:MONTH + MOC_ORIENT:YEAR + MOC_ORIENT:DAY + MOC_ORIENT:PLACE + MOC_ORIENT:CITY + 1 IF BASELINE EDUCATION WAS 12 YEARS OR LESS == 0] |                     |

VARIABLES MOC\_64 TO MOC\_86 SHOULD BE CALCULATED AS FOLLOWED:

**VARIABLE NAME:** MOC\_BLINDSCORE [NUMBER] SHOULD INCREASE SEQUENTIALLY FROM 1 TO 22.

**VARIABLE DESCRIPTION:** TOTAL SCORE ON MONTREAL COGNITIVE ASSESSMENT (MOCA) BLIND VERSION: [NUMBER] SHOULD INCREASE SEQUENTIALLY FROM 1 TO 22.

**VARIABLE CALCULATION:** THE TOTAL SCORE THAT THE VARIABLE CALCULATION EQUALS SHOULD INCREASE SEQUENTIALLY FROM 1 TO 22

|        |                   |
|--------|-------------------|
| MOC_87 | MOC_BLINDMIS0_MSP |
|--------|-------------------|



[CALCULATE IF MOC\_SIGHT\_MSP = YES]

**CLINICIAN NOTES:** There were not any skipped items on the Montreal Cognitive Assessment (MoCA) Blind version..

[CALCULATED VARIABLE, (\$MOC\_NUMFORW.refuse()\$ ? 1 : 0) + (\$MOC\_NUMBACK.refuse()\$ ? 1 : 0) + (\$MOC\_LETTER.refuse()\$ ? 1 : 0) + (\$MOC\_SUBS.refuse()\$ ? 1 : 0) + (\$MOC\_SUBS.refuse()\$ ? 1 : 0) + (\$MOC\_REPET.refuse()\$ ? 1 : 0) + (\$MOC\_REPET.refuse()\$ ? 1 : 0) + (\$MOC\_WORDSFNUM.refuse()\$ ? 1 : 0) + (\$MOC\_WORDSIM.refuse()\$ ? 1 : 0) + (\$MOC\_WORDSIM.refuse()\$ ? 1 : 0) + (\$MOC\_MEM3.refuse()\$ ? 1 : 0) + (\$MOC\_ORIENT.refuse()\$ ? 1 : 0) == 0]

|        |                   |
|--------|-------------------|
| MOC_88 | MOC_BLINDMIS1_MSP |
|--------|-------------------|

[CALCULATE IF MOC\_SIGHT\_MSP = YES]

**CLINICIAN NOTES:** Not all components of the Montreal Cognitive Assessment (MoCA) Blind version may have been completed. This variable identifies the number of points out of the total score of 22 that the participant did not receive due to skipping tasks on the MoCA-BLIND which is administered to participants with severe visual impairment. Number of points: 1

[CALCULATED VARIABLE, MOC\_LETTER\_MSP (REFUSED) + MOC\_NUMFORW\_MSP (REFUSED) + MOC\_NUMBACK\_MSP (REFUSED) + MOC\_SUBS\_MSP (REFUSED) + MOC\_REPET\_MSP (REFUSED) + MOC\_WORDSFNUM\_MSP (REFUSED), MOC\_WORDSIM\_MSP (REFUSED), MOC\_MEM3\_MSP (REFUSED), MOC\_ORIENT\_MSP (REFUSED)]

**VARIABLES MOC\_89 TO MOC\_98 SHOULD BE CALCULATED AS FOLLOWED:**

**VARIABLE NAME:** MOC\_TOTALMIS[NUMBER] SHOULD INCREASE SEQUENTIALLY FROM 2 TO 10 OR MORE.

**VARIABLE DESCRIPTION:** TOTAL NUMBER OF MISSING POINTS ON MONTREAL COGNITIVE ASSESSMENT (MOCA): [NUMBER] SHOULD INCREASE SEQUENTIALLY FROM 1 TO 10 OR MORE.

**VARIABLE CALCULATION:** THE TOTAL SCORE THAT THE VARIABLE CALCULATION EQUALS SHOULD INCREASE SEQUENTIALLY FROM 1 TO 10 OR MORE

|        |                   |
|--------|-------------------|
| MOC_99 | MOC_MISSCORE0_MSP |
|--------|-------------------|

The Memory Score Index (MIS) is scored out of a maximum of 15. A score of 8 and above is considered normal. The participant's score on the MIS is: 0

[CALCULATED VARIABLE, SUM OF (MOC\_MEM3\_MSP = FACE, VELVET, CHURCH, DAISY, AND/OR RED \* 3) + (MOC\_MISCUE1\_MSP = FACE, VELVET, CHURCH, DAISY, AND/OR RED \* 2) + (MOC\_MISCUE2\_MSP = FACE, VELVET, CHURCH, DAISY, AND/OR RED)]

**VARIABLES MOC\_100 TO MOC\_115 SHOULD BE CALCULATED AS FOLLOWED:**

**VARIABLE NAME:** MOC\_MISSCORE[NUMBER] SHOULD INCREASE SEQUENTIALLY FROM 1 TO 15.

**VARIABLE DESCRIPTION:** TOTAL SCORE MEMORY SCORE INDEX SHOULD INCREASE SEQUENTIALLY FROM 1 TO 15.

**VARIABLE CALCULATION:** THE TOTAL SCORE THAT THE VARIABLE CALCULATION EQUALS SHOULD INCREASE SEQUENTIALLY FROM 1 TO 15

|                                                                                                                                                                                                                          |                            |
|--------------------------------------------------------------------------------------------------------------------------------------------------------------------------------------------------------------------------|----------------------------|
| <b>MOC_116</b>                                                                                                                                                                                                           | <b>MOC_MISSCOREMIS_MSP</b> |
| <b>CLINICIAN NOTES:</b> Not all components of the Montreal Cognitive Assessment (MoCA) Memory Impairment Section (MIS) were completed. Please take this into consideration when interpreting the total score of the MIS. |                            |
| <b>[CALCULATED VARIABLE, MOC_MEM3_MSP (REFUSED) OR MOC_MISCUE1_MSP (REFUSED) OR MOC_MISCUE2_MSP (REFUSED)]</b>                                                                                                           |                            |

|                                                                                                                                                                                                                        |                      |
|------------------------------------------------------------------------------------------------------------------------------------------------------------------------------------------------------------------------|----------------------|
| <b>MOC_117</b>                                                                                                                                                                                                         | <b>MOC_NOTES_MSP</b> |
| <b>[ALWAYS ASK]</b>                                                                                                                                                                                                    |                      |
| Do you have any additional notes to include for this module? For example, were there any issues with the testing environment that should be taken into account when interpreting the results of the cognitive testing? |                      |
| YES                                                                                                                                                                                                                    | 1 Yes                |
| NO                                                                                                                                                                                                                     | 2 No                 |

|                                                                                         |                         |
|-----------------------------------------------------------------------------------------|-------------------------|
| <b>MOC_118</b>                                                                          | <b>MOC_NOTES_SP_MSP</b> |
| <b>[ASK IF MOC_NOTES_MSP = YES]</b>                                                     |                         |
| <b>CLINICIAN NOTE:</b> Please do not enter any identifying information in this section. |                         |
| Please provide any notes below:                                                         |                         |

**MOC\_END**

## Preliminary Diagnosis of Neurocognitive Disorder (NCD)

|                 |                                                                                                                                                                                                                                                                                          |
|-----------------|------------------------------------------------------------------------------------------------------------------------------------------------------------------------------------------------------------------------------------------------------------------------------------------|
| <b>Overview</b> | Please use this module to document your preliminary diagnosis of the participant's cognitive status based on the clinical assessment and informant interview. This module does not contain questions related to planning the care of individuals diagnosed with neurocognitive disorder. |
|-----------------|------------------------------------------------------------------------------------------------------------------------------------------------------------------------------------------------------------------------------------------------------------------------------------------|

|                                                                                                                                                                                                                                                                                                    |                    |                                                                                                                                                                                                                                         |
|----------------------------------------------------------------------------------------------------------------------------------------------------------------------------------------------------------------------------------------------------------------------------------------------------|--------------------|-----------------------------------------------------------------------------------------------------------------------------------------------------------------------------------------------------------------------------------------|
| <b>NCD_1</b>                                                                                                                                                                                                                                                                                       | <b>NCD_DIA_MSP</b> |                                                                                                                                                                                                                                         |
| <b>[ALWAYS ASK]</b>                                                                                                                                                                                                                                                                                |                    |                                                                                                                                                                                                                                         |
| Based on the clinical evaluation and informant interview, what is your diagnosis of the participant?                                                                                                                                                                                               |                    |                                                                                                                                                                                                                                         |
| <b>CLINICIAN NOTE:</b> The category of "no significant cognitive concerns" also includes participants without any cognitive complaints that performed poorly on the Montreal Cognitive Assessment (MoCA) if confounders such as language or education are thought to explain the poor performance. |                    |                                                                                                                                                                                                                                         |
| <b>CODE ONLY ONE RESPONSE</b>                                                                                                                                                                                                                                                                      |                    |                                                                                                                                                                                                                                         |
| NORMAL                                                                                                                                                                                                                                                                                             | 1                  | No significant cognitive concerns                                                                                                                                                                                                       |
| SUB                                                                                                                                                                                                                                                                                                | 2                  | Normal cognition but with subjective cognitive decline (self-reported confusion or memory problems happening more often and getting worse over last year but not meeting the criteria for either mild or major neurocognitive disorder) |
| DELIRIUM                                                                                                                                                                                                                                                                                           | 3                  | Delirium                                                                                                                                                                                                                                |
| MILD                                                                                                                                                                                                                                                                                               | 4                  | Mild neurocognitive disorder                                                                                                                                                                                                            |
| MAJOR                                                                                                                                                                                                                                                                                              | 5                  | Major neurocognitive disorder                                                                                                                                                                                                           |

|                                                                                                                                                                                         |                     |                                    |
|-----------------------------------------------------------------------------------------------------------------------------------------------------------------------------------------|---------------------|------------------------------------|
| <b>NCD_2</b>                                                                                                                                                                            | <b>NCD_CONF_MSP</b> |                                    |
| <b>[ALWAYS ASK]</b>                                                                                                                                                                     |                     |                                    |
| How confident are you in your diagnosis? Please rate on an 11-point scale (0-10; with the anchors of 0, indicating the lowest confidence rating, and 10, the highest confidence rating) |                     |                                    |
| NUMBER                                                                                                                                                                                  | Number              | _____ <b>[MASK: MIN=0, MAX=10]</b> |

|                                                                                   |                    |                                            |
|-----------------------------------------------------------------------------------|--------------------|--------------------------------------------|
| <b>NCD_3</b>                                                                      | <b>NCD_DOM_MSP</b> |                                            |
| <b>[ASK IF NCD_DIA_MSP = SUB, MILD ,OR MAJOR]</b>                                 |                    |                                            |
| What cognitive domains have been impacted by cognitive decline?                   |                    |                                            |
| <b>MULTIPLE RESPONSES ALLOWED (EXCEPT IF 96 IS SELECTED), CODE ALL THAT APPLY</b> |                    |                                            |
| AT                                                                                | 01                 | Attention                                  |
| EF                                                                                | 02                 | Executive function                         |
| LM                                                                                | 03                 | Learning and memory                        |
| LG_                                                                               | 04                 | Language                                   |
| PC                                                                                | 05                 | Perceptual/motor                           |
| SC                                                                                | 06                 | Social cognition                           |
| NONE                                                                              | 96                 | No cognitive domains appear to be impacted |

|                                                                                            |                     |                                                 |
|--------------------------------------------------------------------------------------------|---------------------|-------------------------------------------------|
| <b>NCD_4</b>                                                                               | <b>NCD_INFO_MSP</b> |                                                 |
| <b>[ALWAYS ASK]</b>                                                                        |                     |                                                 |
| What additional information or resources would increase your confidence in your diagnosis? |                     |                                                 |
| <b>MULTIPLE RESPONSES ALLOWED, CODE ALL THAT APPLY</b>                                     |                     |                                                 |
| NONE                                                                                       | 1                   | None                                            |
| LAB                                                                                        | 2                   | Laboratory investigations                       |
| IMG                                                                                        | 3                   | Neuroimaging                                    |
| REF                                                                                        | 4                   | Referral to a consultant                        |
| TIM                                                                                        | 5                   | Opportunity to follow the participant over time |
| OTSP                                                                                       | 7                   | Other (please specify: _____)                   |

|                                                                                                      |                     |                                                                     |
|------------------------------------------------------------------------------------------------------|---------------------|---------------------------------------------------------------------|
| <b>NCD_5</b>                                                                                         | <b>NCD_TYPE_MSP</b> |                                                                     |
| <b>[ASK IF NCD_DIA_MSP = MILD OR MAJOR]</b>                                                          |                     |                                                                     |
| Based on the clinical evaluation and informant interview, what is your diagnosis of the participant? |                     |                                                                     |
| <b>CODE ONLY ONE RESPONSE</b>                                                                        |                     |                                                                     |
| ALZ                                                                                                  | 1                   | Alzheimer's Disease                                                 |
| LWY                                                                                                  | 2                   | Lewy Body Disease                                                   |
| PKD                                                                                                  | 3                   | Parkinson's Disease                                                 |
| VSC                                                                                                  | 4                   | Vascular Cognitive Impairment                                       |
| FRT                                                                                                  | 5                   | Frontotemporal Degeneration                                         |
| TBI                                                                                                  | 6                   | Traumatic Brain Injury (Including Chronic Traumatic Encephalopathy) |
| MLT                                                                                                  | 7                   | Multiple (or Mixed) etiologies                                      |
| OTSP                                                                                                 | 8                   | Other (please specify: _____)                                       |
| UNK                                                                                                  | 9                   | Unknown                                                             |

|                                                                                                                                                                                                                                                                 |                        |                                    |
|-----------------------------------------------------------------------------------------------------------------------------------------------------------------------------------------------------------------------------------------------------------------|------------------------|------------------------------------|
| <b>NCD_6</b>                                                                                                                                                                                                                                                    | <b>NCD_TYPCONF_MSP</b> |                                    |
| <b>[ASK IF NCD_DIA_MSP = MILD OR MAJOR]</b>                                                                                                                                                                                                                     |                        |                                    |
| How confident are you in your diagnosis of the underlying cause of the mild or major neurocognitive disorder?<br>Please rate on an 11-point scale (0-10; with the anchors of 0, indicating the lowest confidence rating, and 10, the highest confidence rating) |                        |                                    |
| NUMBER                                                                                                                                                                                                                                                          | Number                 | _____ <b>[MASK: MIN=0, MAX=10]</b> |

|                                                                                            |                        |                                                 |
|--------------------------------------------------------------------------------------------|------------------------|-------------------------------------------------|
| <b>NCD_7</b>                                                                               | <b>NCD_TYPIINF_MSP</b> |                                                 |
| <b>[ASK IF NCD_DIA_MSP = MILD OR MAJOR]</b>                                                |                        |                                                 |
| What additional information or resources would increase your confidence in your diagnosis? |                        |                                                 |
| <b>MULTIPLE RESPONSES ALLOWED, CODE ALL THAT APPLY</b>                                     |                        |                                                 |
| NONE                                                                                       | 1                      | None                                            |
| LAB                                                                                        | 2                      | Laboratory investigations                       |
| IMG                                                                                        | 3                      | Neuroimaging                                    |
| REF                                                                                        | 4                      | Referral to a consultant                        |
| TIM                                                                                        | 5                      | Opportunity to follow the participant over time |
| OTSP                                                                                       | 7                      | Other (please specify: _____)                   |

|                                                                                                                                                                                                                                       |                      |
|---------------------------------------------------------------------------------------------------------------------------------------------------------------------------------------------------------------------------------------|----------------------|
| <b>NCD_8</b>                                                                                                                                                                                                                          | <b>NCD_NOTES_MSP</b> |
| <b>[ALWAYS ASK]</b>                                                                                                                                                                                                                   |                      |
| Do you have any additional notes? For example, are there any other details regarding your clinical assessment with the participant that you have not previously recorded that impacted the diagnosis you provided to the participant? |                      |
| YES                                                                                                                                                                                                                                   | 1 Yes                |
| NO                                                                                                                                                                                                                                    | 2 No                 |

|                                                                                         |                         |
|-----------------------------------------------------------------------------------------|-------------------------|
| <b>NCD_9</b>                                                                            | <b>NCD_NOTES_SP_MSP</b> |
| <b>[ASK IF NCD_NOTES_MSP = YES]</b>                                                     |                         |
| <b>CLINICIAN NOTE:</b> Please do not enter any identifying information in this section. |                         |
| Please provide any notes below:                                                         |                         |

|                                                                                                                                                                                                                                                                                                |                        |
|------------------------------------------------------------------------------------------------------------------------------------------------------------------------------------------------------------------------------------------------------------------------------------------------|------------------------|
| <b>NCD_10</b>                                                                                                                                                                                                                                                                                  | <b>NCD_LETTER1_MSP</b> |
| <b>ALWAYS ASK</b>                                                                                                                                                                                                                                                                              |                        |
| <b>DO NOT READ:</b> If your clinical assessment of the participant indicates that there may be a concern about the participant's memory, please fill out the CLSA Memory Study Participant Letter Template – Potential Cognitive Concerns template with the participant's name and MoCA score. |                        |
| If your clinical assessment of the participant indicates that there are not any concerns about the participant's memory, please fill out the CLSA Memory Study Participant Letter Template – No Cognitive Concerns template with the participant's name and MoCA score.                        |                        |
| Give the letter to the participant and verbally discuss the content.                                                                                                                                                                                                                           |                        |

|                                             |                        |
|---------------------------------------------|------------------------|
| <b>NCD_11</b>                               | <b>NCD_LETTER2_MSP</b> |
| <b>ALWAYS ASK</b>                           |                        |
| Did you give the letter to the participant? |                        |
| YES                                         | 1 Yes                  |
| NO                                          | 2 No                   |

|                                                           |                        |
|-----------------------------------------------------------|------------------------|
| <b>NCD_12</b>                                             | <b>NCD_LETTER3_MSP</b> |
| <b>[ASK IF NCD_LETTER_MSP = NO]</b>                       |                        |
| Why did you not give the letter to the participant? _____ |                        |

**NCD\_END**

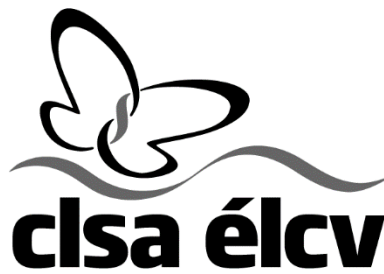

Canadian Longitudinal Study on Aging  
Étude longitudinale canadienne sur le vieillissement

# **Supplementary Appendix 6 - Informant Questionnaire (Canadian Longitudinal Study on Aging (CLSA) Memory Study)**

**v1.1, 2022 October 12**

**Table of Contents**

1  
2  
3  
4  
5  
6  
7  
8  
9  
10  
11  
12  
13 Relationship to Participant (INF) ..... 1  
14 AD8 Dementia Screening Interview (AD8)..... 2  
15 Medical History (MED) ..... 8  
16 Basic Activities of Daily Living (ADL) ..... 13  
17 Instrumental Activities of Daily Living (IADL) ..... 20  
18 Transportation (TRA) ..... 27  
19 Mild Behavioural Impairment Checklist (MBI) ..... 29  
20  
21  
22  
23  
24  
25  
26  
27  
28  
29  
30  
31  
32  
33  
34  
35  
36  
37  
38  
39  
40  
41  
42  
43  
44  
45  
46  
47  
48  
49  
50  
51  
52  
53  
54  
55  
56  
57

Peer review only

1  
2  
3  
4  
5  
6  
7  
8  
9  
10  
11  
12  
13  
14  
15  
16  
17  
18  
19  
20  
21  
22  
23  
24  
25  
26  
27  
28  
29  
30  
31  
32  
33  
34  
35  
36  
37  
38  
39  
40  
41  
42  
43  
44  
45  
46  
47  
48  
49  
50  
51  
52  
53  
54  
55  
56  
57  
58  
59  
60



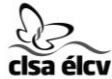

## Relationship to Participant (INF)

|                 |                                                                                                                                                                                                                                   |
|-----------------|-----------------------------------------------------------------------------------------------------------------------------------------------------------------------------------------------------------------------------------|
| <b>Overview</b> | This questionnaire will be completed by an informant, a family member or friend who knows the participant well and can answer questions regarding the participant's medical history, functional abilities, and overall behaviour. |
|-----------------|-----------------------------------------------------------------------------------------------------------------------------------------------------------------------------------------------------------------------------------|

First, I would like to ask you about your relationship with @first\_name@.

|                                              |                    |                                             |
|----------------------------------------------|--------------------|---------------------------------------------|
| <b>REL_1</b>                                 | <b>INF_REL_MSI</b> |                                             |
| <b>[ALWAYS ASK]</b>                          |                    |                                             |
| What is your relationship with @first_name@? |                    |                                             |
| <b>CODE ONLY ONE RESPONSE</b>                |                    |                                             |
| PARTNER                                      | 1                  | Spouse/partner                              |
| CHILD                                        | 2                  | Child                                       |
| SIBLING                                      | 3                  | Sibling                                     |
| FRIEND                                       | 4                  | Friend                                      |
| OT_SP                                        | 5                  | Other, specify: _____                       |
| DK_NA                                        | 8                  | <b>[DO NOT READ]</b> Don't know / No answer |
| REFUSED                                      | 9                  | <b>[DO NOT READ]</b> Refused                |

|                                                            |                       |                                             |
|------------------------------------------------------------|-----------------------|---------------------------------------------|
| <b>REL_2</b>                                               | <b>INF_GENDER_MSI</b> |                                             |
| <b>[ALWAYS ASK]</b>                                        |                       |                                             |
| What pronoun should we use when referring to @first_name@? |                       |                                             |
| <b>CODE ONLY ONE RESPONSE</b>                              |                       |                                             |
| HIM                                                        | 1                     | He/him/his                                  |
| HER                                                        | 2                     | She/her/hers                                |
| THEM                                                       | 3                     | They/them/theirs                            |
| OT_SP                                                      | 5                     | Other, specify: _____                       |
| DK_NA                                                      | 8                     | <b>[DO NOT READ]</b> Don't know / No answer |
| REFUSED                                                    | 9                     | <b>[DO NOT READ]</b> Refused                |

**REL\_END**



## AD8 Dementia Screening Interview (AD8)

Reprinted with permission. Copyright 2005. The Eight-item Informant Interview to Differentiate Aging and Dementia is a copyrighted instrument of Washington University, St. Louis, Missouri. All Rights Reserved. Please refer to Galvin JE et al, The AD8, a brief informant interview to detect dementia, *Neurology* 2005; 65:559-564,

|                 |                                                                                                                                                                                                                                                                                                                                                                                                                                                                                                                                                                                                                                                                                                                                                                                                                                     |
|-----------------|-------------------------------------------------------------------------------------------------------------------------------------------------------------------------------------------------------------------------------------------------------------------------------------------------------------------------------------------------------------------------------------------------------------------------------------------------------------------------------------------------------------------------------------------------------------------------------------------------------------------------------------------------------------------------------------------------------------------------------------------------------------------------------------------------------------------------------------|
| <b>Overview</b> | <p>The Eight-item Informant Interview to Differentiate Aging and Dementia (AD8) was designed as a screening tool to identify early cognitive changes associated with many common subtypes of dementia including Alzheimer's Disease, vascular dementia, Lewy body dementia, and frontotemporal dementia.</p> <p>The informant should specifically be asked to rate changes in the participant's ability for each of the items, without attributing causality. If read aloud to the respondent, it is important for the interviewer to carefully read the phrase <u>as worded</u> and give emphasis to note changes due to cognitive problems (not physical problems). There should be a one second delay between individual items.</p> <p>There is no specific timeframe for change required to be used for this questionnaire.</p> |
|-----------------|-------------------------------------------------------------------------------------------------------------------------------------------------------------------------------------------------------------------------------------------------------------------------------------------------------------------------------------------------------------------------------------------------------------------------------------------------------------------------------------------------------------------------------------------------------------------------------------------------------------------------------------------------------------------------------------------------------------------------------------------------------------------------------------------------------------------------------------|

For the next few questions, please think about @first\_name@'s cognitive abilities in regard to thinking and memory problems.

For each question, please respond "yes" if you have noticed a change and "no" if you have not noticed a change in @first\_name@ over the past several years.

|                                                                                                                |                  |                                             |
|----------------------------------------------------------------------------------------------------------------|------------------|---------------------------------------------|
| <b>AD8_1</b>                                                                                                   | <b>AD8_1_MSI</b> |                                             |
| <b>[ALWAYS ASK]</b>                                                                                            |                  |                                             |
| Problems with judgment (e.g., problems with making decisions, bad financial decisions, problems with thinking) |                  |                                             |
| YES                                                                                                            | 1                | Yes                                         |
| NO                                                                                                             | 2                | No                                          |
| DK_NA                                                                                                          | 8                | <b>[DO NOT READ]</b> Don't know / No answer |
| REFUSED                                                                                                        | 9                | <b>[DO NOT READ]</b> Refused                |

|              |                  |
|--------------|------------------|
| <b>AD8_2</b> | <b>AD8_2_MSI</b> |
|--------------|------------------|

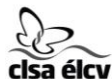

|                                     |   |                                             |
|-------------------------------------|---|---------------------------------------------|
| <b>[ALWAYS ASK]</b>                 |   |                                             |
| Less interest in hobbies/activities |   |                                             |
| YES                                 | 1 | Yes                                         |
| NO                                  | 2 | No                                          |
| DK_NA                               | 8 | <b>[DO NOT READ]</b> Don't know / No answer |
| REFUSED                             | 9 | <b>[DO NOT READ]</b> Refused                |

|                                                                           |                  |                                             |
|---------------------------------------------------------------------------|------------------|---------------------------------------------|
| <b>AD8_3</b>                                                              | <b>AD8_3_MSI</b> |                                             |
| <b>[ALWAYS ASK]</b>                                                       |                  |                                             |
| Repeats the same things over and over (questions, stories, or statements) |                  |                                             |
| YES                                                                       | 1                | Yes                                         |
| NO                                                                        | 2                | No                                          |
| DK_NA                                                                     | 8                | <b>[DO NOT READ]</b> Don't know / No answer |
| REFUSED                                                                   | 9                | <b>[DO NOT READ]</b> Refused                |

|                                                                                                           |                  |                                             |
|-----------------------------------------------------------------------------------------------------------|------------------|---------------------------------------------|
| <b>AD8_4</b>                                                                                              | <b>AD8_4_MSI</b> |                                             |
| <b>[ALWAYS ASK]</b>                                                                                       |                  |                                             |
| Trouble learning how to use a tool, appliance, or gadget (e.g., VCR, computer, microwave, remote control) |                  |                                             |
| YES                                                                                                       | 1                | Yes                                         |
| NO                                                                                                        | 2                | No                                          |
| DK_NA                                                                                                     | 8                | <b>[DO NOT READ]</b> Don't know / No answer |
| REFUSED                                                                                                   | 9                | <b>[DO NOT READ]</b> Refused                |

|                               |                  |                                             |
|-------------------------------|------------------|---------------------------------------------|
| <b>AD8_5</b>                  | <b>AD8_5_MSI</b> |                                             |
| <b>[ALWAYS ASK]</b>           |                  |                                             |
| Forgets correct month or year |                  |                                             |
| YES                           | 1                | Yes                                         |
| NO                            | 2                | No                                          |
| DK_NA                         | 8                | <b>[DO NOT READ]</b> Don't know / No answer |
| REFUSED                       | 9                | <b>[DO NOT READ]</b> Refused                |

|              |                  |  |
|--------------|------------------|--|
| <b>AD8_6</b> | <b>AD8_6_MSI</b> |  |
|--------------|------------------|--|

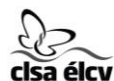

**CLSA Memory Study Informant Questionnaire**  
v1.1, 2022 October 12

|                                                                                                         |   |                                             |
|---------------------------------------------------------------------------------------------------------|---|---------------------------------------------|
| <b>[ALWAYS ASK]</b>                                                                                     |   |                                             |
| Trouble handling complicated financial affairs (e.g., balancing check book, income taxes, paying bills) |   |                                             |
| YES                                                                                                     | 1 | Yes                                         |
| NO                                                                                                      | 2 | No                                          |
| DK_NA                                                                                                   | 8 | <b>[DO NOT READ]</b> Don't know / No answer |
| REFUSED                                                                                                 | 9 | <b>[DO NOT READ]</b> Refused                |

|                                  |                  |                                             |
|----------------------------------|------------------|---------------------------------------------|
| <b>AD8_7</b>                     | <b>AD8_7_MSI</b> |                                             |
| <b>[ALWAYS ASK]</b>              |                  |                                             |
| Trouble remembering appointments |                  |                                             |
| YES                              | 1                | Yes                                         |
| NO                               | 2                | No                                          |
| DK_NA                            | 8                | <b>[DO NOT READ]</b> Don't know / No answer |
| REFUSED                          | 9                | <b>[DO NOT READ]</b> Refused                |

|                                                   |                  |                                             |
|---------------------------------------------------|------------------|---------------------------------------------|
| <b>AD8_8</b>                                      | <b>AD8_8_MSI</b> |                                             |
| <b>[ALWAYS ASK]</b>                               |                  |                                             |
| <b>Daily</b> problems with thinking and/or memory |                  |                                             |
| YES                                               | 1                | Yes                                         |
| NO                                                | 2                | No                                          |
| DK_NA                                             | 8                | <b>[DO NOT READ]</b> Don't know / No answer |
| REFUSED                                           | 9                | <b>[DO NOT READ]</b> Refused                |

|                                                                                                       |                            |  |
|-------------------------------------------------------------------------------------------------------|----------------------------|--|
| <b>AD8_9</b>                                                                                          | <b>AD8_TOTALSCORE0_MSI</b> |  |
| <b>[ASK IF SUM OF "YES" RESPONSES FOR AD8_1, AD8_2, AD8_3, AD8_4, AD8_5, AD8_6, AD8_7, AD8_8 = 0]</b> |                            |  |
| <b>Score on the AD8 Dementia Screening Interview: 0</b>                                               |                            |  |

|                                                                                                       |                            |  |
|-------------------------------------------------------------------------------------------------------|----------------------------|--|
| <b>AD8_10</b>                                                                                         | <b>AD8_TOTALSCORE1_MSI</b> |  |
| <b>[ASK IF SUM OF "YES" RESPONSES FOR AD8_1, AD8_2, AD8_3, AD8_4, AD8_5, AD8_6, AD8_7, AD8_8 = 1]</b> |                            |  |

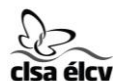

Score on the AD8 Dementia Screening Interview: 1

|        |                     |
|--------|---------------------|
| AD8_11 | AD8_TOTALSCORE2_MSI |
|--------|---------------------|

[ASK IF SUM OF "YES" RESPONSES FOR AD8\_1, AD8\_2, AD8\_3, AD8\_4, AD8\_5, AD8\_6, AD8\_7, AD8\_8 = 2]

Score on the AD8 Dementia Screening Interview: 2

|        |                     |
|--------|---------------------|
| AD8_12 | AD8_TOTALSCORE3_MSI |
|--------|---------------------|

[ASK IF SUM OF "YES" RESPONSES FOR AD8\_1, AD8\_2, AD8\_3, AD8\_4, AD8\_5, AD8\_6, AD8\_7, AD8\_8 = 3]

Score on the AD8 Dementia Screening Interview: 3

|        |                     |
|--------|---------------------|
| AD8_13 | AD8_TOTALSCORE4_MSI |
|--------|---------------------|

[ASK IF SUM OF "YES" RESPONSES FOR AD8\_1, AD8\_2, AD8\_3, AD8\_4, AD8\_5, AD8\_6, AD8\_7, AD8\_8 = 4]

Score on the AD8 Dementia Screening Interview: 4

|        |                     |
|--------|---------------------|
| AD8_14 | AD8_TOTALSCORE5_MSI |
|--------|---------------------|

[ASK IF SUM OF "YES" RESPONSES FOR AD8\_1, AD8\_2, AD8\_3, AD8\_4, AD8\_5, AD8\_6, AD8\_7, AD8\_8 = 5]

Score on the AD8 Dementia Screening Interview: 5

|        |                     |
|--------|---------------------|
| AD8_15 | AD8_TOTALSCORE6_MSI |
|--------|---------------------|

[ASK IF SUM OF "YES" RESPONSES FOR AD8\_1, AD8\_2, AD8\_3, AD8\_4, AD8\_5, AD8\_6, AD8\_7, AD8\_8 = 6]

Score on the AD8 Dementia Screening Interview: 6

|        |                     |
|--------|---------------------|
| AD8_16 | AD8_TOTALSCORE7_MSI |
|--------|---------------------|

[ASK IF SUM OF "YES" RESPONSES FOR AD8\_1, AD8\_2, AD8\_3, AD8\_4, AD8\_5, AD8\_6, AD8\_7, AD8\_8 = 7]



CLSA Memory Study Informant Questionnaire  
v1.1, 2022 October 12

Score on the AD8 Dementia Screening Interview: 7

|        |                     |
|--------|---------------------|
| AD8_17 | AD8_TOTALSCORE8_MSI |
|--------|---------------------|

[ASK IF SUM OF "YES" RESPONSES FOR AD8\_1, AD8\_2, AD8\_3, AD8\_4, AD8\_5, AD8\_6, AD8\_7, AD8\_8 = 8]

Score on the AD8 Dementia Screening Interview: 8

This variable identifies the number of items that were not completed on the Eight-item Informant Interview to Differentiate Aging and Dementia (AD8) questionnaire and should be considered when interpreting the total score of the AD8.

|        |                   |
|--------|-------------------|
| AD8_18 | AD8_TOTALMIS0_MSI |
|--------|-------------------|

[ASK IF SUM OF "DON'T KNOW/NO ANSWER OR REFUSED" RESPONSES FOR AD8\_1, AD8\_2, AD8\_3, AD8\_4, AD8\_5, AD8\_6, AD8\_7, AD8\_8 = 0]

Number of missed questions on the AD8 Dementia Screening Interview: 0

|        |                   |
|--------|-------------------|
| AD8_19 | AD8_TOTALMIS1_MSI |
|--------|-------------------|

[ASK IF SUM OF "DON'T KNOW/NO ANSWER OR REFUSED" RESPONSES FOR AD8\_1, AD8\_2, AD8\_3, AD8\_4, AD8\_5, AD8\_6, AD8\_7, AD8\_8 = 1]

Number of missed questions on the AD8 Dementia Screening Interview: 1

|        |                   |
|--------|-------------------|
| AD8_20 | AD8_TOTALMIS2_MSI |
|--------|-------------------|

[ASK IF SUM OF "DON'T KNOW/NO ANSWER OR REFUSED" RESPONSES FOR AD8\_1, AD8\_2, AD8\_3, AD8\_4, AD8\_5, AD8\_6, AD8\_7, AD8\_8 = 2]

Number of missed questions on the AD8 Dementia Screening Interview: 2

|        |                   |
|--------|-------------------|
| AD8_21 | AD8_TOTALMIS3_MSI |
|--------|-------------------|

[ASK IF SUM OF "DON'T KNOW/NO ANSWER OR REFUSED" RESPONSES FOR AD8\_1, AD8\_2, AD8\_3, AD8\_4, AD8\_5, AD8\_6, AD8\_7, AD8\_8 = 3]

Number of missed questions on the AD8 Dementia Screening Interview: 3

|        |                   |
|--------|-------------------|
| AD8_22 | AD8_TOTALMIS4_MSI |
|--------|-------------------|

[ASK IF SUM OF "DON'T KNOW/NO ANSWER OR REFUSED" RESPONSES FOR AD8\_1, AD8\_2, AD8\_3, AD8\_4, AD8\_5, AD8\_6, AD8\_7, AD8\_8 = 4]



Number of missed questions on the AD8 Dementia Screening Interview: 4

|        |                   |
|--------|-------------------|
| AD8_23 | AD8_TOTALMIS5_MSI |
|--------|-------------------|

[ASK IF SUM OF "DON'T KNOW/NO ANSWER OR REFUSED" RESPONSES FOR AD8\_1, AD8\_2, AD8\_3, AD8\_4, AD8\_5, AD8\_6, AD8\_7, AD8\_8 = 5]

Number of missed questions on the AD8 Dementia Screening Interview: 5

|        |                   |
|--------|-------------------|
| AD8_24 | AD8_TOTALMIS6_MSI |
|--------|-------------------|

[ASK IF SUM OF "DON'T KNOW/NO ANSWER OR REFUSED" RESPONSES FOR AD8\_1, AD8\_2, AD8\_3, AD8\_4, AD8\_5, AD8\_6, AD8\_7, AD8\_8 = 6]

Number of missed questions on the AD8 Dementia Screening Interview: 6

|        |                   |
|--------|-------------------|
| AD8_25 | AD8_TOTALMIS7_MSI |
|--------|-------------------|

[ASK IF SUM OF "DON'T KNOW/NO ANSWER OR REFUSED" RESPONSES FOR AD8\_1, AD8\_2, AD8\_3, AD8\_4, AD8\_5, AD8\_6, AD8\_7, AD8\_8 = 7]

Number of missed questions on the AD8 Dementia Screening Interview: 7

|        |                   |
|--------|-------------------|
| AD8_26 | AD8_TOTALMIS8_MSI |
|--------|-------------------|

[ASK IF SUM OF "DON'T KNOW/NO ANSWER OR REFUSED" RESPONSES FOR AD8\_1, AD8\_2, AD8\_3, AD8\_4, AD8\_5, AD8\_6, AD8\_7, AD8\_8 = 8]

Number of missed questions on the AD8 Dementia Screening Interview: 8

AD8\_END

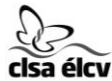

## Medical History (MED)

|                 |                                                                                                                                                                                                                                                                                                                                                                                    |
|-----------------|------------------------------------------------------------------------------------------------------------------------------------------------------------------------------------------------------------------------------------------------------------------------------------------------------------------------------------------------------------------------------------|
| <b>Overview</b> | The medical history module captures information that will assist the examining physician in determining if any observed cognitive limitations may be secondary to other diseases such as neurodegenerative diseases. This information may also increase the confidence in the physician's diagnosis based on the absence or presence of risk factors for neurocognitive disorders. |
|-----------------|------------------------------------------------------------------------------------------------------------------------------------------------------------------------------------------------------------------------------------------------------------------------------------------------------------------------------------------------------------------------------------|

I am now going to ask you some questions regarding @first\_name@'s medical history including different medical conditions he/she may have, and use of other substances. We do not expect you to know every detail about @first\_name@, but ask that you answer to the best of your ability.

|                                                                                                                                                                    |                    |                                          |
|--------------------------------------------------------------------------------------------------------------------------------------------------------------------|--------------------|------------------------------------------|
| <b>MED_1</b>                                                                                                                                                       | <b>MED_CON_MSI</b> |                                          |
| <b>[ALWAYS ASK]</b>                                                                                                                                                |                    |                                          |
| To your knowledge, does @first_name@ have any of the following medical conditions...?                                                                              |                    |                                          |
| <b>INTERVIEWER NOTES:</b> Psychotic illnesses include schizophrenia and other conditions which include hallucinations, delusions and disordered forms of thinking. |                    |                                          |
| <b>READ LIST, MULTIPLE RESPONSES ALLOWED (EXCEPT IF 98 OR 99 ARE SELECTED), CODE ALL THAT APPLY</b>                                                                |                    |                                          |
| CAD                                                                                                                                                                | 1                  | Coronary artery disease                  |
| HF                                                                                                                                                                 | 2                  | Heart failure                            |
| AF                                                                                                                                                                 | 3                  | Atrial fibrillation/flutter              |
| TIA                                                                                                                                                                | 4                  | Transient ischemic attack (TIA)          |
| STR                                                                                                                                                                | 5                  | Cerebrovascular accident (stroke)        |
| HEM                                                                                                                                                                | 6                  | Intracerebral hemorrhage                 |
| HYP                                                                                                                                                                | 7                  | Hypertension                             |
| DIA                                                                                                                                                                | 8                  | Diabetes mellitus                        |
| DYS                                                                                                                                                                | 9                  | Dyslipidemia                             |
| PKD                                                                                                                                                                | 10                 | Parkinson's Disease or Parkinsonism      |
| DEP                                                                                                                                                                | 11                 | Depression                               |
| ANX                                                                                                                                                                | 12                 | Anxiety disorder                         |
| PSY                                                                                                                                                                | 13                 | Psychotic illness                        |
| HR                                                                                                                                                                 | 14                 | Hearing impairment                       |
| VS                                                                                                                                                                 | 15                 | Visual impairment                        |
| SM                                                                                                                                                                 | 16                 | Impaired sense of smell                  |
| DEM                                                                                                                                                                | 17                 | Dementia                                 |
| DELI                                                                                                                                                               | 18                 | Suspected delirium (in the past 5 years) |
| IN                                                                                                                                                                 | 19                 | Insomnia                                 |
| REM                                                                                                                                                                | 20                 | REM-Sleep Behaviour Disorder             |
| OSA                                                                                                                                                                | 21                 | Obstructive Sleep Apnea                  |
| HYPT                                                                                                                                                               | 22                 | Hypothyroidism                           |
| B12                                                                                                                                                                | 23                 | Vitamin B12 deficiency                   |





**CLSA Memory Study Informant Questionnaire**  
v1.1, 2022 October 12

|         |    |                                                                                                     |
|---------|----|-----------------------------------------------------------------------------------------------------|
| OTSP    | 24 | Other conditions relevant to cognitive status (e.g. cancer and/or cancer treatments); specify _____ |
| NONEI   | 25 | None of the above                                                                                   |
| DK_NA   | 98 | <b>[DO NOT READ]</b> Don't know / No answer                                                         |
| REFUSED | 99 | <b>[DO NOT READ]</b> Refused                                                                        |

|                                                                      |                    |                                             |
|----------------------------------------------------------------------|--------------------|---------------------------------------------|
| <b>MED_2</b>                                                         | <b>MED_TBI_MSI</b> |                                             |
| <b>[ALWAYS ASK]</b>                                                  |                    |                                             |
| Has @first_name@ suffered a head injury or a concussion in the past? |                    |                                             |
| YES                                                                  | 1                  | Yes                                         |
| NO                                                                   | 2                  | No                                          |
| DK_NA                                                                | 8                  | <b>[DO NOT READ]</b> Don't know / No answer |
| REFUSED                                                              | 9                  | <b>[DO NOT READ]</b> Refused                |

|                                                                                                              |                     |                                             |
|--------------------------------------------------------------------------------------------------------------|---------------------|---------------------------------------------|
| <b>MED_3</b>                                                                                                 | <b>MED_TBI1_MSI</b> |                                             |
| <b>[ASK IF MED_TBI_MSI = YES]</b>                                                                            |                     |                                             |
| How many head injuries or concussions has @first_name@ had in his/her lifetime?                              |                     |                                             |
| <b>INTERVIEWER NOTE:</b> If the informant cannot remember exact number, please probe for their best estimate |                     |                                             |
| NUM                                                                                                          | Number              | _____ <b>[MASK: MIN=1]</b>                  |
| DK_NA                                                                                                        | 8                   | <b>[DO NOT READ]</b> Don't know / No answer |
| REFUSED                                                                                                      | 9                   | <b>[DO NOT READ]</b> Refused                |

|                                                                                                                                                       |                     |                                                       |
|-------------------------------------------------------------------------------------------------------------------------------------------------------|---------------------|-------------------------------------------------------|
| <b>MED_4</b>                                                                                                                                          | <b>MED_TBI2_MSI</b> |                                                       |
| <b>[ASK IF MED_TBI_MSI = YES]</b>                                                                                                                     |                     |                                                       |
| At what age or in what year did @first_name@ have the most serious head injury?                                                                       |                     |                                                       |
| <b>INTERVIEWER NOTE:</b> If the informant cannot remember the specific year, please probe for their best estimation of when the head injury occurred. |                     |                                                       |
| NB_SP                                                                                                                                                 | Age                 | _____ <b>[MASK: MIN=0, MAX=CURRENT AGE]</b>           |
| YR_SP                                                                                                                                                 | Year                | _____ <b>[MASK: MIN=BIRTH YEAR, MAX=CURRENT YEAR]</b> |
| DK_NA                                                                                                                                                 | 9998                | <b>[DO NOT READ]</b> Don't know / No answer           |
| REFUSED                                                                                                                                               | 9999                | <b>[DO NOT READ]</b> Refused                          |



**CLSA Memory Study Informant Questionnaire**  
v1.1, 2022 October 12

|                                                                                                  |                     |                                                |
|--------------------------------------------------------------------------------------------------|---------------------|------------------------------------------------|
| <b>MED_5</b>                                                                                     | <b>MED_TBI3_MSI</b> |                                                |
| <b>[ASK IF MED_TBI_MSI = YES]</b>                                                                |                     |                                                |
| Did the most serious head injury result in...?                                                   |                     |                                                |
| <b>READ LIST, MULTIPLE RESPONSES ALLOWED (EXCEP IF 8 OR 9 ARE SELECTED), CODE ALL THAT APPLY</b> |                     |                                                |
| DZ                                                                                               | 1                   | Being dazed, confused, or “seeing stars”       |
| DRM                                                                                              | 2                   | Not remembering the injury                     |
| KO                                                                                               | 3                   | Losing consciousness (knocked out)             |
| NONE                                                                                             | 6                   | Head injury did not result in any of the above |
| DK_NA                                                                                            | 8                   | <b>[DO NOT READ]</b> Don't know / No answer    |
| REFUSED                                                                                          | 9                   | <b>[DO NOT READ]</b> Refused                   |

|                                                   |                     |                                             |
|---------------------------------------------------|---------------------|---------------------------------------------|
| <b>MED_6</b>                                      | <b>MED_TBI4_MSI</b> |                                             |
| <b>[ASK IF MED_TBI3_MSI = KO]</b>                 |                     |                                             |
| How long did @first_name@ lose consciousness for? |                     |                                             |
| <b>READ LIST, CODE ONLY ONE RESPONSE</b>          |                     |                                             |
| KO1                                               | 1                   | Less than a minute                          |
| KO20                                              | 2                   | 1-20 minutes                                |
| KO20MORE                                          | 3                   | Longer than minutes                         |
| DK_NA                                             | 8                   | <b>[DO NOT READ]</b> Don't know / No answer |
| REFUSED                                           | 9                   | <b>[DO NOT READ]</b> Refused                |

|                                                          |                          |                                                   |
|----------------------------------------------------------|--------------------------|---------------------------------------------------|
| <b>MED_7</b>                                             | <b>MED_SMKSTATUS_MSI</b> |                                                   |
| <b>[ALWAYS ASK]</b>                                      |                          |                                                   |
| How would you describe @first_name@'s smoking status...? |                          |                                                   |
| <b>READ LIST, CODE ONLY ONE RESPONSE</b>                 |                          |                                                   |
| YES                                                      | 1                        | Yes, he/she currently smokes                      |
| NEVER                                                    | 2                        | No, he/she does not currently smoke and never has |
| FORM_DAY                                                 | 4                        | Former daily smoker (non-smoker now)              |
| FORM_OCC                                                 | 5                        | Former occasional smoker (non-smoker now)         |
| DK_NA                                                    | 8                        | <b>[DO NOT READ]</b> Don't know / No answer       |
| REFUSED                                                  | 9                        | <b>[DO NOT READ]</b> Refused                      |

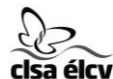

|                                              |                    |                                                              |
|----------------------------------------------|--------------------|--------------------------------------------------------------|
| <b>MED_8</b>                                 | <b>MED_CAN_MSI</b> |                                                              |
| <b>[ALWAYS ASK]</b>                          |                    |                                                              |
| Does @first_name@ use any cannabis products? |                    |                                                              |
| <b>READ LIST, CODE ONLY ONE RESPONSE</b>     |                    |                                                              |
| YES                                          | 1                  | Yes, he/she currently uses cannabis products                 |
| NEVER                                        | 2                  | No, he/she has never used cannabis products                  |
| FORMER                                       | 3                  | Former cannabis user, but does not use cannabis products now |
| DK_NA                                        | 8                  | <b>[DO NOT READ]</b> Don't know / No answer                  |
| REFUSED                                      | 9                  | <b>[DO NOT READ]</b> Refused                                 |

|                                                            |                    |                                                    |
|------------------------------------------------------------|--------------------|----------------------------------------------------|
| <b>MED_9</b>                                               | <b>MED_ALC_MSI</b> |                                                    |
| <b>[ALWAYS ASK]</b>                                        |                    |                                                    |
| How would you describe @first_name@'s alcohol consumption? |                    |                                                    |
| <b>READ LIST, CODE ONLY ONE RESPONSE</b>                   |                    |                                                    |
| NEVER                                                      | 1                  | Never drank alcohol                                |
| FORMER                                                     | 2                  | Used to drink alcohol but does not currently drink |
| CURRENT                                                    | 3                  | Currently consumes alcohol                         |
| DK_NA                                                      | 8                  | <b>[DO NOT READ]</b> Don't know / No answer        |
| REFUSED                                                    | 9                  | <b>[DO NOT READ]</b> Refused                       |

|                                                                                                                                                                                                                                          |                                                                |                                             |
|------------------------------------------------------------------------------------------------------------------------------------------------------------------------------------------------------------------------------------------|----------------------------------------------------------------|---------------------------------------------|
| <b>MED_10</b>                                                                                                                                                                                                                            | <b>MED_ALCNMB_MSI</b>                                          |                                             |
| <b>[ASK IF MED_ALC_MSI = CURRENT]</b>                                                                                                                                                                                                    |                                                                |                                             |
| A "standard" drink is considered 12 ounces of regular beer (~5% alcohol), 5 ounces of wine (~12% alcohol), or 1.5 ounces of distilled spirits (~40% alcohol). How many estimated standardized drinks per week does @first_name@ consume? |                                                                |                                             |
| ALC_NB                                                                                                                                                                                                                                   | Number of standard drinks: _____ <b>[MASK: MIN=0, MAX=200]</b> |                                             |
| DK_NA                                                                                                                                                                                                                                    | 998                                                            | <b>[DO NOT READ]</b> Don't know / No answer |
| REFUSED                                                                                                                                                                                                                                  | 999                                                            | <b>[DO NOT READ]</b> Refused                |



**CLSA Memory Study Informant Questionnaire**  
v1.1, 2022 October 12

|                                                                                                             |                        |                                             |
|-------------------------------------------------------------------------------------------------------------|------------------------|---------------------------------------------|
| <b>MED_11</b>                                                                                               | <b>MED_ALCMLFQ_MSI</b> |                                             |
| <b>[ASK IF MED_ALC_MSI = CURRENT AND AND SEX = MALE]</b>                                                    |                        |                                             |
| In the past 12 months, has @first_name@ consumed 5 or more drinks in 2 hours or less at least once a month? |                        |                                             |
| YES                                                                                                         | 1                      | Yes                                         |
| NO                                                                                                          | 2                      | No                                          |
| DK_NA                                                                                                       | 8                      | <b>[DO NOT READ]</b> Don't know / No answer |
| REFUSED                                                                                                     | 9                      | <b>[DO NOT READ]</b> Refused                |

|                                                                                                             |                        |                                             |
|-------------------------------------------------------------------------------------------------------------|------------------------|---------------------------------------------|
| <b>MED_12</b>                                                                                               | <b>MED_ALCFMFQ_MSI</b> |                                             |
| <b>[ASK IF MED_ALC_MSI = CURRENT AND SEX = FEMALE]</b>                                                      |                        |                                             |
| In the past 12 months, has @first_name@ consumed 4 or more drinks in 2 hours or less at least once a month? |                        |                                             |
| YES                                                                                                         | 1                      | Yes                                         |
| NO                                                                                                          | 2                      | No                                          |
| DK_NA                                                                                                       | 8                      | <b>[DO NOT READ]</b> Don't know / No answer |
| REFUSED                                                                                                     | 9                      | <b>[DO NOT READ]</b> Refused                |

|                                                                                                                 |                    |                                             |
|-----------------------------------------------------------------------------------------------------------------|--------------------|---------------------------------------------|
| <b>MED_13</b>                                                                                                   | <b>MED_FAM_MSI</b> |                                             |
| <b>[ALWAYS ASK]</b>                                                                                             |                    |                                             |
| Does the @first_name@ have a first degree relative who has been diagnosed with dementia or Alzheimer's Disease? |                    |                                             |
| <b>INTERVIEWER NOTE:</b> First degree relatives include biological parents, siblings, or children               |                    |                                             |
| YES                                                                                                             | 1                  | Yes                                         |
| NO                                                                                                              | 2                  | No                                          |
| DK_NA                                                                                                           | 8                  | <b>[DO NOT READ]</b> Don't know / No answer |
| REFUSED                                                                                                         | 9                  | <b>[DO NOT READ]</b> Refused                |

**MED\_END**



## Basic Activities of Daily Living (ADL)

This module is a modification of the Activities of Daily Living questions of the OARS Multidimensional Assessment Questionnaire© developed by Dr. Gerda G. Fillenbaum (Duke University Medical Center). The Canadian Longitudinal Study on Aging received permission from Dr. Fillenbaum (instrument developer) for the use of this instrument.

|                 |                                                                                                                                                                                                                                                                                                                                                                                                                                                                                                                                                                                                                                                                                                                                                                                                                                                                       |
|-----------------|-----------------------------------------------------------------------------------------------------------------------------------------------------------------------------------------------------------------------------------------------------------------------------------------------------------------------------------------------------------------------------------------------------------------------------------------------------------------------------------------------------------------------------------------------------------------------------------------------------------------------------------------------------------------------------------------------------------------------------------------------------------------------------------------------------------------------------------------------------------------------|
| <b>Overview</b> | <p>The Activities of Daily Living (ADL) scale assesses respondents' ability to perform <u>basic</u> daily activities. Activities of daily living are the tasks considered vital to live independently in the community.</p> <p>The informant is asked if the participant requires help when feeding and dressing oneself, taking care of their appearance, walking around, getting in and out of bed, bathing, and whether the participant has incontinence problems. These basic daily activities can be difficult to perform for people with mobility restrictions or limitations.</p> <p>Information on activities of daily living will help provide insights into limitations that Canadians may face in day-to-day living, as well as how these limitations change as people age. It is a measure related to the need for caregivers and home care services.</p> |
|-----------------|-----------------------------------------------------------------------------------------------------------------------------------------------------------------------------------------------------------------------------------------------------------------------------------------------------------------------------------------------------------------------------------------------------------------------------------------------------------------------------------------------------------------------------------------------------------------------------------------------------------------------------------------------------------------------------------------------------------------------------------------------------------------------------------------------------------------------------------------------------------------------|

Now I'd like to ask you about activities of daily living. You may feel that some of these questions do not apply to @first\_name@, but it is important that we ask the same questions of everyone.

|                                                                                                                 |                      |                                             |
|-----------------------------------------------------------------------------------------------------------------|----------------------|---------------------------------------------|
| <b>ADL_1</b>                                                                                                    | <b>ADL_ABLDR_MSI</b> |                                             |
| <b>[ALWAYS ASK]</b>                                                                                             |                      |                                             |
| Can @first_name@ dress and undress without help (including picking out clothes and putting on socks and shoes)? |                      |                                             |
| YES                                                                                                             | 1                    | Yes                                         |
| NO                                                                                                              | 2                    | No                                          |
| DK_NA                                                                                                           | 8                    | <b>[DO NOT READ]</b> Don't know / No answer |
| REFUSED                                                                                                         | 9                    | <b>[DO NOT READ]</b> Refused                |

|                                                    |                     |                                             |
|----------------------------------------------------|---------------------|---------------------------------------------|
| <b>ADL_2</b>                                       | <b>ADL_HPDR_MSI</b> |                                             |
| <b>[ASK IF ADL_ABLDR_MSI = NO]</b>                 |                     |                                             |
| Can @first_name@ dress and undress with some help? |                     |                                             |
| YES                                                | 1                   | Yes                                         |
| NO                                                 | 2                   | No                                          |
| DK_NA                                              | 8                   | <b>[DO NOT READ]</b> Don't know / No answer |
| REFUSED                                            | 9                   | <b>[DO NOT READ]</b> Refused                |



**CLSA Memory Study Informant Questionnaire**  
v1.1, 2022 October 12

|                                                         |                     |                                             |
|---------------------------------------------------------|---------------------|---------------------------------------------|
| <b>ADL_3</b>                                            | <b>ADL_UNDR_MSI</b> |                                             |
| <b>[ASK IF ADL_HPDR_MSI = NO]</b>                       |                     |                                             |
| Is @first_name@ completely unable to dress and undress? |                     |                                             |
| YES                                                     | 1                   | Yes                                         |
| NO                                                      | 2                   | No                                          |
| DK_NA                                                   | 8                   | <b>[DO NOT READ]</b> Don't know / No answer |
| REFUSED                                                 | 9                   | <b>[DO NOT READ]</b> Refused                |

|                                                                                   |                      |                                             |
|-----------------------------------------------------------------------------------|----------------------|---------------------------------------------|
| <b>ADL_4</b>                                                                      | <b>ADL_ABLFD_MSI</b> |                                             |
| <b>[ALWAYS ASK]</b>                                                               |                      |                                             |
| Can @first_name@ eat without help (i.e., able to feed him or herself completely)? |                      |                                             |
| YES                                                                               | 1                    | Yes                                         |
| NO                                                                                | 2                    | No                                          |
| DK_NA                                                                             | 8                    | <b>[DO NOT READ]</b> Don't know / No answer |
| REFUSED                                                                           | 9                    | <b>[DO NOT READ]</b> Refused                |

|                                                                                 |                     |                                             |
|---------------------------------------------------------------------------------|---------------------|---------------------------------------------|
| <b>ADL_5</b>                                                                    | <b>ADL_HPFD_MSI</b> |                                             |
| <b>[ASK IF ADL_ABLFD_MSI = NO]</b>                                              |                     |                                             |
| Can @first_name@ eat with some help (i.e., needs help with cutting food, etc.)? |                     |                                             |
| YES                                                                             | 1                   | Yes                                         |
| NO                                                                              | 2                   | No                                          |
| DK_NA                                                                           | 8                   | <b>[DO NOT READ]</b> Don't know / No answer |
| REFUSED                                                                         | 9                   | <b>[DO NOT READ]</b> Refused                |

|                                                               |                     |                                             |
|---------------------------------------------------------------|---------------------|---------------------------------------------|
| <b>ADL_6</b>                                                  | <b>ADL_UNFD_MSI</b> |                                             |
| <b>[ASK IF ADL_HPFD_MSI = NO]</b>                             |                     |                                             |
| Is @first_name@ completely unable to feed himself or herself? |                     |                                             |
| YES                                                           | 1                   | Yes                                         |
| NO                                                            | 2                   | No                                          |
| DK_NA                                                         | 8                   | <b>[DO NOT READ]</b> Don't know / No answer |
| REFUSED                                                       | 9                   | <b>[DO NOT READ]</b> Refused                |



|                                                                                                                  |               |                                             |
|------------------------------------------------------------------------------------------------------------------|---------------|---------------------------------------------|
| ADL_7                                                                                                            | ADL_ABLAP_MSI |                                             |
| <b>[ALWAYS ASK]</b>                                                                                              |               |                                             |
| Can @first_name@ take care of his/her own appearance without help, for example, combing hair, shaving (if male)? |               |                                             |
| YES                                                                                                              | 1             | Yes                                         |
| NO                                                                                                               | 2             | No                                          |
| DK_NA                                                                                                            | 8             | <b>[DO NOT READ]</b> Don't know / No answer |
| REFUSED                                                                                                          | 9             | <b>[DO NOT READ]</b> Refused                |

|                                                                         |              |                                             |
|-------------------------------------------------------------------------|--------------|---------------------------------------------|
| ADL_8                                                                   | ADL_HPAP_MSI |                                             |
| <b>[ASK IF ADL_ABLAP_MSI = NO]</b>                                      |              |                                             |
| Can @first_name@ take care of his or her own appearance with some help? |              |                                             |
| YES                                                                     | 1            | Yes                                         |
| NO                                                                      | 2            | No                                          |
| DK_NA                                                                   | 8            | <b>[DO NOT READ]</b> Don't know / No answer |
| REFUSED                                                                 | 9            | <b>[DO NOT READ]</b> Refused                |

|                                                                              |              |                                             |
|------------------------------------------------------------------------------|--------------|---------------------------------------------|
| ADL_9                                                                        | ADL_UNAP_MSI |                                             |
| <b>[ASK IF ADL_HPAP_MSI = NO]</b>                                            |              |                                             |
| Is @first_name@ completely unable to take care of his or her own appearance? |              |                                             |
| YES                                                                          | 1            | Yes                                         |
| NO                                                                           | 2            | No                                          |
| DK_NA                                                                        | 8            | <b>[DO NOT READ]</b> Don't know / No answer |
| REFUSED                                                                      | 9            | <b>[DO NOT READ]</b> Refused                |



**CLSA Memory Study Informant Questionnaire**  
v1.1, 2022 October 12

|                                                                       |                      |                                             |
|-----------------------------------------------------------------------|----------------------|---------------------------------------------|
| <b>ADL_10</b>                                                         | <b>ADL_ABLWK_MSI</b> |                                             |
| <b>[ALWAYS ASK]</b>                                                   |                      |                                             |
| Can @first_name@ walk without help?                                   |                      |                                             |
| <b>INTERVIEWER NOTE: IF PARTICIPANT WALKS WITH A CANE CODE AS YES</b> |                      |                                             |
| YES                                                                   | 1                    | Yes                                         |
| NO                                                                    | 2                    | No                                          |
| DK_NA                                                                 | 8                    | <b>[DO NOT READ]</b> Don't know / No answer |
| REFUSED                                                               | 9                    | <b>[DO NOT READ]</b> Refused                |

|                                                                                                    |                     |                                             |
|----------------------------------------------------------------------------------------------------|---------------------|---------------------------------------------|
| <b>ADL_11</b>                                                                                      | <b>ADL_HPWK_MSI</b> |                                             |
| <b>[ASK IF ADL_ABLWK_MSI = NO]</b>                                                                 |                     |                                             |
| Can @first_name@ walk with some help from a person, or with the use of a walker or crutches, etc.? |                     |                                             |
| YES                                                                                                | 1                   | Yes                                         |
| NO                                                                                                 | 2                   | No                                          |
| DK_NA                                                                                              | 8                   | <b>[DO NOT READ]</b> Don't know / No answer |
| REFUSED                                                                                            | 9                   | <b>[DO NOT READ]</b> Refused                |

|                                            |                     |                                             |
|--------------------------------------------|---------------------|---------------------------------------------|
| <b>ADL_12</b>                              | <b>ADL_UNWK_MSI</b> |                                             |
| <b>[ASK IF ADL_HPWK_MSI = NO]</b>          |                     |                                             |
| Is @first_name@ completely unable to walk? |                     |                                             |
| YES                                        | 1                   | Yes                                         |
| NO                                         | 2                   | No                                          |
| DK_NA                                      | 8                   | <b>[DO NOT READ]</b> Don't know / No answer |
| REFUSED                                    | 9                   | <b>[DO NOT READ]</b> Refused                |



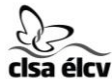

|                                                                  |               |                                             |
|------------------------------------------------------------------|---------------|---------------------------------------------|
| ADL_13                                                           | ADL_ABLBD_MSI |                                             |
| <b>[ALWAYS ASK]</b>                                              |               |                                             |
| Can @first_name@ get in and out of bed without any help or aids? |               |                                             |
| YES                                                              | 1             | Yes                                         |
| NO                                                               | 2             | No                                          |
| DK_NA                                                            | 8             | <b>[DO NOT READ]</b> Don't know / No answer |
| REFUSED                                                          | 9             | <b>[DO NOT READ]</b> Refused                |

|                                                                                                              |              |                                             |
|--------------------------------------------------------------------------------------------------------------|--------------|---------------------------------------------|
| ADL_14                                                                                                       | ADL_HPBD_MSI |                                             |
| <b>[ASK IF ADL_ABLBD_MSI = NO]</b>                                                                           |              |                                             |
| Can @first_name@ get in and out of bed with some help (either from a person or with the aid of some device)? |              |                                             |
| YES                                                                                                          | 1            | Yes                                         |
| NO                                                                                                           | 2            | No                                          |
| DK_NA                                                                                                        | 8            | <b>[DO NOT READ]</b> Don't know / No answer |
| REFUSED                                                                                                      | 9            | <b>[DO NOT READ]</b> Refused                |

|                                                                                      |              |                                             |
|--------------------------------------------------------------------------------------|--------------|---------------------------------------------|
| ADL_15                                                                               | ADL_UNBD_MSI |                                             |
| <b>[ASK IF ADL_HPBD_MSI = NO]</b>                                                    |              |                                             |
| Is @first_name@ totally dependent on someone else to lift him/her in and out of bed? |              |                                             |
| YES                                                                                  | 1            | Yes                                         |
| NO                                                                                   | 2            | No                                          |
| DK_NA                                                                                | 8            | <b>[DO NOT READ]</b> Don't know / No answer |
| REFUSED                                                                              | 9            | <b>[DO NOT READ]</b> Refused                |

|                                                      |               |                                             |
|------------------------------------------------------|---------------|---------------------------------------------|
| ADL_16                                               | ADL_ABLBT_MSI |                                             |
| <b>[ALWAYS ASK]</b>                                  |               |                                             |
| Can @first_name@ take a bath or shower without help? |               |                                             |
| YES                                                  | 1             | Yes                                         |
| NO                                                   | 2             | No                                          |
| DK_NA                                                | 8             | <b>[DO NOT READ]</b> Don't know / No answer |
| REFUSED                                              | 9             | <b>[DO NOT READ]</b> Refused                |



**CLSA Memory Study Informant Questionnaire**  
v1.1, 2022 October 12

|                                                                                                                                                              |              |                                             |
|--------------------------------------------------------------------------------------------------------------------------------------------------------------|--------------|---------------------------------------------|
| ADL_17                                                                                                                                                       | ADL_HPBT_MSI |                                             |
| <b>[ASK IF ADL_ABLBT_MSI = NO]</b>                                                                                                                           |              |                                             |
| Can @first_name@ take a bath or shower with some help (i.e., needs help from someone getting in and out of the tub or needs special attachments on the tub)? |              |                                             |
| YES                                                                                                                                                          | 1            | Yes                                         |
| NO                                                                                                                                                           | 2            | No                                          |
| DK_NA                                                                                                                                                        | 8            | <b>[DO NOT READ]</b> Don't know / No answer |
| REFUSED                                                                                                                                                      | 9            | <b>[DO NOT READ]</b> Refused                |

|                                                                                   |              |                                             |
|-----------------------------------------------------------------------------------|--------------|---------------------------------------------|
| ADL_18                                                                            | ADL_UNBT_MSI |                                             |
| <b>[ASK IF ADL_HPBT_MSI = NO]</b>                                                 |              |                                             |
| Is @first_name@ completely unable to take a bath and a shower by himself/herself? |              |                                             |
| YES                                                                               | 1            | Yes                                         |
| NO                                                                                | 2            | No                                          |
| DK_NA                                                                             | 8            | <b>[DO NOT READ]</b> Don't know / No answer |
| REFUSED                                                                           | 9            | <b>[DO NOT READ]</b> Refused                |

|                                                                      |              |                                             |
|----------------------------------------------------------------------|--------------|---------------------------------------------|
| ADL_19                                                               | ADL_BATH_MSI |                                             |
| <b>[ALWAYS ASK]</b>                                                  |              |                                             |
| Does @first_name@ ever have trouble getting to the bathroom in time? |              |                                             |
| YES                                                                  | 1            | Yes                                         |
| NO                                                                   | 2            | No                                          |
| DK_NA                                                                | 8            | <b>[DO NOT READ]</b> Don't know / No answer |
| REFUSED                                                              | 9            | <b>[DO NOT READ]</b> Refused                |



|                                                                                                 |               |                                             |
|-------------------------------------------------------------------------------------------------|---------------|---------------------------------------------|
| ADL_20                                                                                          | ADL_INCNT_MSI |                                             |
| [ASK IF ADL_BATH_MSI = YES]                                                                     |               |                                             |
| How often does @first_name@ wet or soil himself/herself (either day or night)? Would you say... |               |                                             |
| <b>READ LIST, CODE ONLY ONE RESPONSE</b>                                                        |               |                                             |
| 0_1_TIME_WEEK                                                                                   | 1             | Never or less than once a week              |
| 1_2_TIME_WEEK                                                                                   | 2             | Once or twice a week                        |
| 3_MORE_TIMES_WEEK                                                                               | 3             | Three times a week or more                  |
| DK_NA                                                                                           | 8             | <b>[DO NOT READ]</b> Don't know / No answer |
| REFUSED                                                                                         | 9             | <b>[DO NOT READ]</b> Refused                |

ADL\_END



## Instrumental Activities of Daily Living (IADL)

This module is a modification of the Activities of Daily Living questions of the OARS Multidimensional Assessment Questionnaire© developed by Dr. Gerda G. Fillenbaum (Duke University Medical Center). The Canadian Longitudinal Study on Aging received permission from Dr. Fillenbaum (instrument developer) for the use of this instrument.

|                 |                                                                                                                                                                                                                                                                                                                                                                                                                                                                                                                                                                                                                                                                       |
|-----------------|-----------------------------------------------------------------------------------------------------------------------------------------------------------------------------------------------------------------------------------------------------------------------------------------------------------------------------------------------------------------------------------------------------------------------------------------------------------------------------------------------------------------------------------------------------------------------------------------------------------------------------------------------------------------------|
| <b>Overview</b> | <p>The Instrumental Activities of Daily Living (IADL) scale assesses respondents' ability to independently perform a series of daily activities.</p> <p>The informant is asked if the participant requires help when using the telephone, traveling, shopping, cooking, doing housework, taking medicine and handling money. Information on instrumental activities of daily living will help provide insights into limitations that Canadians may face day-to-day living, as well as how these limitations change as people age. It is a measure related to the need for caregivers and home care services.</p> <p>This module is a companion to the ADL module.</p> |
|-----------------|-----------------------------------------------------------------------------------------------------------------------------------------------------------------------------------------------------------------------------------------------------------------------------------------------------------------------------------------------------------------------------------------------------------------------------------------------------------------------------------------------------------------------------------------------------------------------------------------------------------------------------------------------------------------------|

Now I'd like to ask you about activities of daily living. You may feel that some of these questions do not apply to @first\_name@, but it is important that we ask the same questions of everyone.

|                                                                                             |                       |                                             |
|---------------------------------------------------------------------------------------------|-----------------------|---------------------------------------------|
| <b>IAL_1</b>                                                                                | <b>IAL_ABLTEL_MSI</b> |                                             |
| <b>[ALWAYS ASK]</b>                                                                         |                       |                                             |
| Can @first_name@ use the telephone without help, including looking up numbers and dialling? |                       |                                             |
| YES                                                                                         | 1                     | Yes                                         |
| NO                                                                                          | 2                     | No                                          |
| DK_NA                                                                                       | 8                     | <b>[DO NOT READ]</b> Don't know / No answer |
| REFUSED                                                                                     | 9                     | <b>[DO NOT READ]</b> Refused                |

|                                                                                                                                                                                           |                       |                                             |
|-------------------------------------------------------------------------------------------------------------------------------------------------------------------------------------------|-----------------------|---------------------------------------------|
| <b>IAL_2</b>                                                                                                                                                                              | <b>IAL_HPTTEL_MSI</b> |                                             |
| <b>[ASK IF IAL_ABLTEL_MSI = NO]</b>                                                                                                                                                       |                       |                                             |
| Can @first_name@ use the telephone with some help (i.e., can answer the phone or dial the operator in an emergency, but needs a special phone or help in getting the number or dialling)? |                       |                                             |
| YES                                                                                                                                                                                       | 1                     | Yes                                         |
| NO                                                                                                                                                                                        | 2                     | No                                          |
| DK_NA                                                                                                                                                                                     | 8                     | <b>[DO NOT READ]</b> Don't know / No answer |
| REFUSED                                                                                                                                                                                   | 9                     | <b>[DO NOT READ]</b> Refused                |



|                                                         |               |                                             |
|---------------------------------------------------------|---------------|---------------------------------------------|
| IAL_3                                                   | IAL_UNTEL_MSI |                                             |
| <b>[ASK IF IAL_HPTTEL_MSI = NO]</b>                     |               |                                             |
| Is @first_name@ completely unable to use the telephone? |               |                                             |
| YES                                                     | 1             | Yes                                         |
| NO                                                      | 2             | No                                          |
| DK_NA                                                   | 8             | <b>[DO NOT READ]</b> Don't know / No answer |
| REFUSED                                                 | 9             | <b>[DO NOT READ]</b> Refused                |

|                                                                                                                                |                |                                             |
|--------------------------------------------------------------------------------------------------------------------------------|----------------|---------------------------------------------|
| IAL_4                                                                                                                          | IAL_ABLTRV_MSI |                                             |
| <b>[ALWAYS ASK]</b>                                                                                                            |                |                                             |
| Can @first_name@ get to places out of walking distance without help (i.e., drive own car, or travel alone on buses, or taxis)? |                |                                             |
| YES                                                                                                                            | 1              | Yes                                         |
| NO                                                                                                                             | 2              | No                                          |
| DK_NA                                                                                                                          | 8              | <b>[DO NOT READ]</b> Don't know / No answer |
| REFUSED                                                                                                                        | 9              | <b>[DO NOT READ]</b> Refused                |

|                                                                                                                                                 |               |                                             |
|-------------------------------------------------------------------------------------------------------------------------------------------------|---------------|---------------------------------------------|
| IAL_5                                                                                                                                           | IAL_HPTRV_MSI |                                             |
| <b>[ASK IF IAL_ABLTRV_MSI = NO]</b>                                                                                                             |               |                                             |
| Can @first_name@ get to places out of walking distance with some help (i.e., needs someone to help him/her or go with him/her when travelling)? |               |                                             |
| YES                                                                                                                                             | 1             | Yes                                         |
| NO                                                                                                                                              | 2             | No                                          |
| DK_NA                                                                                                                                           | 8             | <b>[DO NOT READ]</b> Don't know / No answer |
| REFUSED                                                                                                                                         | 9             | <b>[DO NOT READ]</b> Refused                |



**CLSA Memory Study Informant Questionnaire**  
v1.1, 2022 October 12

|                                                                                                                       |               |                                             |
|-----------------------------------------------------------------------------------------------------------------------|---------------|---------------------------------------------|
| IAL_6                                                                                                                 | IAL_UNTRV_MSI |                                             |
| <b>[ASK IF IAL_HPTRV_MSI = NO]</b>                                                                                    |               |                                             |
| Is @first_name@ unable to travel unless emergency arrangements are made for a specialized vehicle, like an ambulance? |               |                                             |
| YES                                                                                                                   | 1             | Yes                                         |
| NO                                                                                                                    | 2             | No                                          |
| DK_NA                                                                                                                 | 8             | <b>[DO NOT READ]</b> Don't know / No answer |
| REFUSED                                                                                                               | 9             | <b>[DO NOT READ]</b> Refused                |

|                                                                                                         |                |                                             |
|---------------------------------------------------------------------------------------------------------|----------------|---------------------------------------------|
| IAL_7                                                                                                   | IAL_ABLGRO_MSI |                                             |
| <b>[ALWAYS ASK]</b>                                                                                     |                |                                             |
| Can @first_name@ go shopping for groceries or clothes without help (taking care of all shopping needs)? |                |                                             |
| YES                                                                                                     | 1              | Yes                                         |
| NO                                                                                                      | 2              | No                                          |
| DK_NA                                                                                                   | 8              | <b>[DO NOT READ]</b> Don't know / No answer |
| REFUSED                                                                                                 | 9              | <b>[DO NOT READ]</b> Refused                |

|                                                                                                                                      |               |                                             |
|--------------------------------------------------------------------------------------------------------------------------------------|---------------|---------------------------------------------|
| IAL_8                                                                                                                                | IAL_HPGRO_MSI |                                             |
| <b>[ASK IF IAL_ABLGRO_MSI = NO]</b>                                                                                                  |               |                                             |
| Can @first_name@ go shopping for groceries or clothes with some help (i.e., needs someone to go with him/her on all shopping trips)? |               |                                             |
| YES                                                                                                                                  | 1             | Yes                                         |
| NO                                                                                                                                   | 2             | No                                          |
| DK_NA                                                                                                                                | 8             | <b>[DO NOT READ]</b> Don't know / No answer |
| REFUSED                                                                                                                              | 9             | <b>[DO NOT READ]</b> Refused                |



|                                                       |               |                                             |
|-------------------------------------------------------|---------------|---------------------------------------------|
| IAL_9                                                 | IAL_UNGRO_MSI |                                             |
| <b>[ASK IF IAL_HPGRO_MSI = NO]</b>                    |               |                                             |
| Is @first_name@ completely unable to do any shopping? |               |                                             |
| YES                                                   | 1             | Yes                                         |
| NO                                                    | 2             | No                                          |
| DK_NA                                                 | 8             | <b>[DO NOT READ]</b> Don't know / No answer |
| REFUSED                                               | 9             | <b>[DO NOT READ]</b> Refused                |

|                                                                                           |               |                                             |
|-------------------------------------------------------------------------------------------|---------------|---------------------------------------------|
| IAL_10                                                                                    | IAL_ABLML_MSI |                                             |
| <b>[ALWAYS ASK]</b>                                                                       |               |                                             |
| Can @first_name@ prepare his/her own meals without help (i.e., plan and cook full meals)? |               |                                             |
| YES                                                                                       | 1             | Yes                                         |
| NO                                                                                        | 2             | No                                          |
| DK_NA                                                                                     | 8             | <b>[DO NOT READ]</b> Don't know / No answer |
| REFUSED                                                                                   | 9             | <b>[DO NOT READ]</b> Refused                |

|                                                                                                                              |              |                                             |
|------------------------------------------------------------------------------------------------------------------------------|--------------|---------------------------------------------|
| IAL_11                                                                                                                       | IAL_HPML_MSI |                                             |
| <b>[ASK IF IAL_ABLML_MSI = NO]</b>                                                                                           |              |                                             |
| Can @first_name@ prepare his/her own meals with some help (i.e., can prepare some things but are unable to cook full meals)? |              |                                             |
| YES                                                                                                                          | 1            | Yes                                         |
| NO                                                                                                                           | 2            | No                                          |
| DK_NA                                                                                                                        | 8            | <b>[DO NOT READ]</b> Don't know / No answer |
| REFUSED                                                                                                                      | 9            | <b>[DO NOT READ]</b> Refused                |

|                                                         |              |                                             |
|---------------------------------------------------------|--------------|---------------------------------------------|
| IAL_12                                                  | IAL_UNML_MSI |                                             |
| <b>[ASK IF IAL_HPML_MSI = NO]</b>                       |              |                                             |
| Is @first_name@ completely unable to prepare any meals? |              |                                             |
| YES                                                     | 1            | Yes                                         |
| NO                                                      | 2            | No                                          |
| DK_NA                                                   | 8            | <b>[DO NOT READ]</b> Don't know / No answer |
| REFUSED                                                 | 9            | <b>[DO NOT READ]</b> Refused                |



CLSA Memory Study Informant Questionnaire  
v1.1, 2022 October 12

|                                                                            |                |                                             |
|----------------------------------------------------------------------------|----------------|---------------------------------------------|
| IAL_13                                                                     | IAL_ABLWRK_MSI |                                             |
| <b>[ALWAYS ASK]</b>                                                        |                |                                             |
| Can @first_name@ do housework without help (i.e., can clean floors, etc.)? |                |                                             |
| YES                                                                        | 1              | Yes                                         |
| NO                                                                         | 2              | No                                          |
| DK_NA                                                                      | 8              | <b>[DO NOT READ]</b> Don't know / No answer |
| REFUSED                                                                    | 9              | <b>[DO NOT READ]</b> Refused                |

|                                                                                                             |               |                                             |
|-------------------------------------------------------------------------------------------------------------|---------------|---------------------------------------------|
| IAL_14                                                                                                      | IAL_HPWRK_MSI |                                             |
| <b>[ASK IF IAL_ABLWRK_MSI = NO]</b>                                                                         |               |                                             |
| Can @first_name@ do housework with some help (i.e., can do light housework but needs help with heavy work)? |               |                                             |
| YES                                                                                                         | 1             | Yes                                         |
| NO                                                                                                          | 2             | No                                          |
| DK_NA                                                                                                       | 8             | <b>[DO NOT READ]</b> Don't know / No answer |
| REFUSED                                                                                                     | 9             | <b>[DO NOT READ]</b> Refused                |

|                                                        |               |                                             |
|--------------------------------------------------------|---------------|---------------------------------------------|
| IAL_15                                                 | IAL_UNWRK_MSI |                                             |
| <b>[ASK IF IAL_HPWRK_MSI = NO]</b>                     |               |                                             |
| Is @first_name@ completely unable to do any housework? |               |                                             |
| YES                                                    | 1             | Yes                                         |
| NO                                                     | 2             | No                                          |
| DK_NA                                                  | 8             | <b>[DO NOT READ]</b> Don't know / No answer |
| REFUSED                                                | 9             | <b>[DO NOT READ]</b> Refused                |

|                                                                                                    |                |                                             |
|----------------------------------------------------------------------------------------------------|----------------|---------------------------------------------|
| IAL_16                                                                                             | IAL_ABLMED_MSI |                                             |
| <b>[ALWAYS ASK]</b>                                                                                |                |                                             |
| Can @first_name@ take his or her own medicine without help (in the right doses at the right time)? |                |                                             |
| <b>INTERVIEWER INSTRUCTIONS: IF THE PARTICIPANT OCCASIONALLY FORGETS, CODE AS 'YES'.</b>           |                |                                             |
| YES                                                                                                | 1              | Yes                                         |
| NO                                                                                                 | 2              | No                                          |
| DK_NA                                                                                              | 8              | <b>[DO NOT READ]</b> Don't know / No answer |
| REFUSED                                                                                            | 9              | <b>[DO NOT READ]</b> Refused                |





|                                                                                                                                                              |               |                                             |
|--------------------------------------------------------------------------------------------------------------------------------------------------------------|---------------|---------------------------------------------|
| IAL_17                                                                                                                                                       | IAL_HPMED_MSI |                                             |
| <b>[ASK IF IAL_ABLMED_MSI = NO]</b>                                                                                                                          |               |                                             |
| Can @first_name@ take his or her own medicine with some help (i.e., able to take medicine if someone prepares it for him/her or reminds him/her to take it)? |               |                                             |
| YES                                                                                                                                                          | 1             | Yes                                         |
| NO                                                                                                                                                           | 2             | No                                          |
| DK_NA                                                                                                                                                        | 8             | <b>[DO NOT READ]</b> Don't know / No answer |
| REFUSED                                                                                                                                                      | 9             | <b>[DO NOT READ]</b> Refused                |

|                                                                 |               |                                             |
|-----------------------------------------------------------------|---------------|---------------------------------------------|
| IAL_18                                                          | IAL_UNMED_MSI |                                             |
| <b>[ASK IF IAL_HPMED_MSI = NO]</b>                              |               |                                             |
| Is @first_name@ completely unable to take his/her own medicine? |               |                                             |
| YES                                                             | 1             | Yes                                         |
| NO                                                              | 2             | No                                          |
| DK_NA                                                           | 8             | <b>[DO NOT READ]</b> Don't know / No answer |
| REFUSED                                                         | 9             | <b>[DO NOT READ]</b> Refused                |

|                                                                                                |               |                                             |
|------------------------------------------------------------------------------------------------|---------------|---------------------------------------------|
| IAL_19                                                                                         | IAL_ABLMO_MSI |                                             |
| <b>[ALWAYS ASK]</b>                                                                            |               |                                             |
| Can @first_name@ handle his/her own money without help (i.e., write cheques, pay bills, etc.)? |               |                                             |
| <b>INTERVIEWER INSTRUCTIONS: IF THE PARTICIPANT OCCASIONALLY FORGETS, CODE AS 'YES'.</b>       |               |                                             |
| YES                                                                                            | 1             | Yes                                         |
| NO                                                                                             | 2             | No                                          |
| DK_NA                                                                                          | 8             | <b>[DO NOT READ]</b> Don't know / No answer |
| REFUSED                                                                                        | 9             | <b>[DO NOT READ]</b> Refused                |



**CLSA Memory Study Informant Questionnaire**  
v1.1, 2022 October 12

|                                                                                                                                                    |              |                                             |
|----------------------------------------------------------------------------------------------------------------------------------------------------|--------------|---------------------------------------------|
| IAL_20                                                                                                                                             | IAL_HPMO_MSI |                                             |
| <b>[ASK IF IAL_ABLMO_MSI = NO]</b>                                                                                                                 |              |                                             |
| Can @first_name@ handle his/her own money with some help (i.e., manage day-to-day buying but needs help with managing chequebook or paying bills)? |              |                                             |
| YES                                                                                                                                                | 1            | Yes                                         |
| NO                                                                                                                                                 | 2            | No                                          |
| DK_NA                                                                                                                                              | 8            | <b>[DO NOT READ]</b> Don't know / No answer |
| REFUSED                                                                                                                                            | 9            | <b>[DO NOT READ]</b> Refused                |

|                                                                |              |                                             |
|----------------------------------------------------------------|--------------|---------------------------------------------|
| IAL_21                                                         | IAL_UNMO_MSI |                                             |
| <b>[ASK IF IAL_HPMO_MSI = NO]</b>                              |              |                                             |
| Is @first_name@ completely unable to handle his/her own money? |              |                                             |
| YES                                                            | 1            | Yes                                         |
| NO                                                             | 2            | No                                          |
| DK_NA                                                          | 8            | <b>[DO NOT READ]</b> Don't know / No answer |
| REFUSED                                                        | 9            | <b>[DO NOT READ]</b> Refused                |

IAL\_END



## Transportation (TRA)

|                 |                                                                                                                                   |
|-----------------|-----------------------------------------------------------------------------------------------------------------------------------|
| <b>Overview</b> | The questions in this module ask the informant about the participant's driving status and details regarding their license status. |
|-----------------|-----------------------------------------------------------------------------------------------------------------------------------|

I will now ask you a few questions about @first\_name@'s ability to use different types of transportation.

|                                                                                                               |                        |                                                                                                                                                     |
|---------------------------------------------------------------------------------------------------------------|------------------------|-----------------------------------------------------------------------------------------------------------------------------------------------------|
| <b>TRA_1</b>                                                                                                  | <b>TRA_DSTATUS_MSI</b> |                                                                                                                                                     |
| <b>[ALWAYS ASK]</b>                                                                                           |                        |                                                                                                                                                     |
| Which of the following describes @first_name@ driving status...? (Include cars, vans, trucks and motorcycles) |                        |                                                                                                                                                     |
| <b>READ LIST, CODE ONLY ONE RESPONSE</b>                                                                      |                        |                                                                                                                                                     |
| NEVER                                                                                                         | 1                      | Never had a driver's license                                                                                                                        |
| FORMER                                                                                                        | 2                      | Had a driver's license at one point in his or her life, but currently does not have it                                                              |
| CURRENT                                                                                                       | 3                      | Has a driver's license without restrictions (except corrective lenses )                                                                             |
| RESTRICTED                                                                                                    | 4                      | Has a driver's license with restrictions on time of driving (daylight only), distance from home, type of road (no highway), or number of passengers |
| DK_NA                                                                                                         | 8                      | <b>[DO NOT READ]</b> Don't know / No answer                                                                                                         |
| REFUSED                                                                                                       | 9                      | <b>[DO NOT READ]</b> Refused                                                                                                                        |

|                                       |                     |                                             |
|---------------------------------------|---------------------|---------------------------------------------|
| <b>TRA_2</b>                          | <b>TRA_STOP_MSI</b> |                                             |
| <b>[ASK IF TRA_STA_MSI = FORMER]</b>  |                     |                                             |
| Why did @first_name@ stop driving...? |                     |                                             |
| <b>CODE ONLY ONE RESPONSE</b>         |                     |                                             |
| VOL_STOP                              | 1                   | Voluntarily stopped driving                 |
| LICS_RESC                             | 2                   | License rescinded                           |
| OT_SP                                 | 3                   | Other (please specify: _____)               |
| DK_NA                                 | 8                   | <b>[DO NOT READ]</b> Don't know / No answer |
| REFUSED                               | 9                   | <b>[DO NOT READ]</b> Refused                |

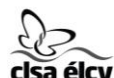

**CLSA Memory Study Informant Questionnaire**  
v1.1, 2022 October 12

|                                                            |                |                                                       |
|------------------------------------------------------------|----------------|-------------------------------------------------------|
| TRA_3                                                      | TRA_STOPYR_MSI |                                                       |
| <b>[ASK IF TRA_STA_MSI =FORMER]</b>                        |                |                                                       |
| In what year or at what age did @first_name@ stop driving? |                |                                                       |
| NB_SP                                                      | Age            | _____ <b>[MASK: MIN=00, MAX=CURRENT AGE]</b>          |
| YR_SP                                                      | Year           | _____ <b>[MASK: MIN=BIRTH YEAR, MAX=CURRENT YEAR]</b> |
| DK_NA                                                      | 9998           | <b>[DO NOT READ]</b> Don't know / No answer           |
| REFUSED                                                    | 9999           | <b>[DO NOT READ]</b> Refused                          |

|                                                               |                 |                                                           |
|---------------------------------------------------------------|-----------------|-----------------------------------------------------------|
| TRA_4                                                         | TRA_TRANSIT_MSI |                                                           |
| <b>[ALWAYS ASK]</b>                                           |                 |                                                           |
| How would you describe @first_name@ use of public transit...? |                 |                                                           |
| <b>CODE ONLY ONE RESPONSE</b>                                 |                 |                                                           |
| CURR                                                          | 1               | Currently uses                                            |
| COULD                                                         | 2               | Does not use public transit, but could if they wanted to  |
| CANNOT                                                        | 3               | Does not use public transit and does not think they could |
| DK_NA                                                         | 8               | <b>[DO NOT READ]</b> Don't know / No answer               |
| REFUSED                                                       | 9               | <b>[DO NOT READ]</b> Refused                              |

TRA\_END



## Mild Behavioural Impairment Checklist (MBI)

This module consists of the Mild Behavioural Impairment Checklist developed by Dr. Zahinoor Ismail (University of Calgary).

|          |                                                                                                                                                                                                                                                                                                                                                                                                                                                                                                                                                                                                                                                                                                                                                                                                                                                |
|----------|------------------------------------------------------------------------------------------------------------------------------------------------------------------------------------------------------------------------------------------------------------------------------------------------------------------------------------------------------------------------------------------------------------------------------------------------------------------------------------------------------------------------------------------------------------------------------------------------------------------------------------------------------------------------------------------------------------------------------------------------------------------------------------------------------------------------------------------------|
| Overview | <p>Mild Behavioural Impairment (MBI) refers to neuropsychiatric symptoms which are usually observed before cognitive decline and dementia in individuals aged 50 years and older. MBI describes symptoms of any severity that persist for at least six months, and occur either before or at the same time as mild neurocognitive disorder.</p> <p>The MBI Checklist is a 34-item instrument which can be completed by a patient/participant, close informant, or clinician.</p> <p>The checklist is designed to quantify the severity of behavioural symptoms in multiple domains. Global and domain-specific scores and thresholds have not yet been developed and validated for clinical diagnosis and prognosis. Ongoing validation work will identify scores and thresholds that predict an increased risk of transition to dementia.</p> |
|----------|------------------------------------------------------------------------------------------------------------------------------------------------------------------------------------------------------------------------------------------------------------------------------------------------------------------------------------------------------------------------------------------------------------------------------------------------------------------------------------------------------------------------------------------------------------------------------------------------------------------------------------------------------------------------------------------------------------------------------------------------------------------------------------------------------------------------------------------------|

I will now ask you some questions about @first\_name@’s behaviour. For each question, please answer “yes” if you have noticed this behaviour continuously or on and off for **at least 6 months**, and if it is a **change** from her/his longstanding pattern of behaviour. Otherwise, please answer “no”.

For each question you respond “yes” to indicating a change in behaviour, I will ask you to respond about the severity of the behaviour based on the following options:

- 1) Mild where the change in behaviour is noticeable, but not a significant change;
- 2) Moderate where the change in behaviour is significant, but not a dramatic change;
- 3) Severe where the change in behaviour is marked or prominent, a dramatic change.

If there is more than one behaviour listed in a question, please rate the most severe behavioural change.

The first domain describes interest, motivation, and drive.

| MBI_1                                                                | MBI_INTER_MSI |                                            |
|----------------------------------------------------------------------|---------------|--------------------------------------------|
| <b>[ALWAYS ASK]</b>                                                  |               |                                            |
| Has the person lost interest in friends, family, or home activities? |               |                                            |
| YES                                                                  | 1             | Yes                                        |
| NO                                                                   | 2             | No                                         |
| DK_NA                                                                | 8             | <b>DO NOT READ]</b> Don’t know / No answer |
| REFUSED                                                              | 9             | <b>DO NOT READ]</b> Refused                |



**CLSA Memory Study Informant Questionnaire**  
v1.1, 2022 October 12

|                                                           |                         |                                           |
|-----------------------------------------------------------|-------------------------|-------------------------------------------|
| <b>MBI_2</b>                                              | <b>MBI_INTERSEV_MSI</b> |                                           |
| <b>[ASK IF MBI_INTER_MSI = Yes]</b>                       |                         |                                           |
| How would you describe the severity of this behaviour...? |                         |                                           |
| <b>CODE ONLY ONE RESPONSE</b>                             |                         |                                           |
| MILD                                                      | 1                       | Mild                                      |
| MOD                                                       | 2                       | Moderate                                  |
| SEVERE                                                    | 3                       | Severe                                    |
| DK_NA                                                     | 8                       | <b>DO NOT READ</b> Don't know / No answer |
| REFUSED                                                   | 9                       | <b>DO NOT READ</b> Refused                |

|                                                                                              |                     |                                           |
|----------------------------------------------------------------------------------------------|---------------------|-------------------------------------------|
| <b>MBI_3</b>                                                                                 | <b>MBI_CURI_MSI</b> |                                           |
| <b>[ALWAYS ASK]</b>                                                                          |                     |                                           |
| Does the person lack curiosity in topics that would usually have attracted her/his interest? |                     |                                           |
| YES                                                                                          | 1                   | Yes                                       |
| NO                                                                                           | 2                   | No                                        |
| DK_NA                                                                                        | 8                   | <b>DO NOT READ</b> Don't know / No answer |
| REFUSED                                                                                      | 9                   | <b>DO NOT READ</b> Refused                |

|                                                           |                        |                                           |
|-----------------------------------------------------------|------------------------|-------------------------------------------|
| <b>MBI_4</b>                                              | <b>MBI_CURISEV_MSI</b> |                                           |
| <b>[ASK IF MBI_CURI_MSI = Yes]</b>                        |                        |                                           |
| How would you describe the severity of this behaviour...? |                        |                                           |
| <b>CODE ONLY ONE RESPONSE</b>                             |                        |                                           |
| MILD                                                      | 1                      | Mild                                      |
| MOD                                                       | 2                      | Moderate                                  |
| SEVERE                                                    | 3                      | Severe                                    |
| DK_NA                                                     | 8                      | <b>DO NOT READ</b> Don't know / No answer |
| REFUSED                                                   | 9                      | <b>DO NOT READ</b> Refused                |



|                                                                                                                              |   |              |                                           |   |   |   |   |   |    |    |    |    |    |    |
|------------------------------------------------------------------------------------------------------------------------------|---|--------------|-------------------------------------------|---|---|---|---|---|----|----|----|----|----|----|
| 1                                                                                                                            | 2 | 3            | 4                                         | 5 | 6 | 7 | 8 | 9 | 10 | 11 | 12 | 13 | 14 | 15 |
| MBI_5                                                                                                                        |   | MBI_SPON_MSI |                                           |   |   |   |   |   |    |    |    |    |    |    |
| [ALWAYS ASK]                                                                                                                 |   |              |                                           |   |   |   |   |   |    |    |    |    |    |    |
| Has the person become less spontaneous and active – for example, is she/he less likely to initiate or maintain conversation? |   |              |                                           |   |   |   |   |   |    |    |    |    |    |    |
| YES                                                                                                                          |   | 1            | Yes                                       |   |   |   |   |   |    |    |    |    |    |    |
| NO                                                                                                                           |   | 2            | No                                        |   |   |   |   |   |    |    |    |    |    |    |
| DK_NA                                                                                                                        |   | 8            | <b>DO NOT READ</b> Don't know / No answer |   |   |   |   |   |    |    |    |    |    |    |
| REFUSED                                                                                                                      |   | 9            | <b>DO NOT READ</b> Refused                |   |   |   |   |   |    |    |    |    |    |    |

|                                                           |    |                 |                                           |    |    |    |    |    |    |    |    |    |    |    |
|-----------------------------------------------------------|----|-----------------|-------------------------------------------|----|----|----|----|----|----|----|----|----|----|----|
| 16                                                        | 17 | 18              | 19                                        | 20 | 21 | 22 | 23 | 24 | 25 | 26 | 27 | 28 | 29 | 30 |
| MBI_6                                                     |    | MBI_SPONSEV_MSI |                                           |    |    |    |    |    |    |    |    |    |    |    |
| [ASK IF MBI_SPON_MSI = Yes]                               |    |                 |                                           |    |    |    |    |    |    |    |    |    |    |    |
| How would you describe the severity of this behaviour...? |    |                 |                                           |    |    |    |    |    |    |    |    |    |    |    |
| CODE ONLY ONE RESPONSE                                    |    |                 |                                           |    |    |    |    |    |    |    |    |    |    |    |
| MILD                                                      |    | 1               | Mild                                      |    |    |    |    |    |    |    |    |    |    |    |
| MOD                                                       |    | 2               | Moderate                                  |    |    |    |    |    |    |    |    |    |    |    |
| SEVERE                                                    |    | 3               | Severe                                    |    |    |    |    |    |    |    |    |    |    |    |
| DK_NA                                                     |    | 8               | <b>DO NOT READ</b> Don't know / No answer |    |    |    |    |    |    |    |    |    |    |    |
| REFUSED                                                   |    | 9               | <b>DO NOT READ</b> Refused                |    |    |    |    |    |    |    |    |    |    |    |

|                                                                           |    |              |                                           |    |    |    |    |    |    |    |    |    |    |    |
|---------------------------------------------------------------------------|----|--------------|-------------------------------------------|----|----|----|----|----|----|----|----|----|----|----|
| 31                                                                        | 32 | 33           | 34                                        | 35 | 36 | 37 | 38 | 39 | 40 | 41 | 42 | 43 | 44 | 45 |
| MBI_7                                                                     |    | MBI_MOTI_MSI |                                           |    |    |    |    |    |    |    |    |    |    |    |
| [ALWAYS ASK]                                                              |    |              |                                           |    |    |    |    |    |    |    |    |    |    |    |
| Has the person lost motivation to act on her/his obligations or interest? |    |              |                                           |    |    |    |    |    |    |    |    |    |    |    |
| YES                                                                       |    | 1            | Yes                                       |    |    |    |    |    |    |    |    |    |    |    |
| NO                                                                        |    | 2            | No                                        |    |    |    |    |    |    |    |    |    |    |    |
| DK_NA                                                                     |    | 8            | <b>DO NOT READ</b> Don't know / No answer |    |    |    |    |    |    |    |    |    |    |    |
| REFUSED                                                                   |    | 9            | <b>DO NOT READ</b> Refused                |    |    |    |    |    |    |    |    |    |    |    |



**CLSA Memory Study Informant Questionnaire**  
v1.1, 2022 October 12

|                                                           |                        |                                            |
|-----------------------------------------------------------|------------------------|--------------------------------------------|
| <b>MBI_8</b>                                              | <b>MBI_MOTISEV_MSI</b> |                                            |
| <b>[ASK IF MBI_MOTI_MSI = Yes]</b>                        |                        |                                            |
| How would you describe the severity of this behaviour...? |                        |                                            |
| <b>CODE ONLY ONE RESPONSE</b>                             |                        |                                            |
| MILD                                                      | 1                      | Mild                                       |
| MOD                                                       | 2                      | Moderate                                   |
| SEVERE                                                    | 3                      | Severe                                     |
| DK_NA                                                     | 8                      | <b>DO NOT READ]</b> Don't know / No answer |
| REFUSED                                                   | 9                      | <b>DO NOT READ]</b> Refused                |

|                                                                                                 |                     |                                            |
|-------------------------------------------------------------------------------------------------|---------------------|--------------------------------------------|
| <b>MBI_9</b>                                                                                    | <b>MBI_EMOT_MSI</b> |                                            |
| <b>[ALWAYS ASK]</b>                                                                             |                     |                                            |
| Is the person less affectionate and/or lacking in emotions when compared to her/his usual self? |                     |                                            |
| YES                                                                                             | 1                   | Yes                                        |
| NO                                                                                              | 2                   | No                                         |
| DK_NA                                                                                           | 8                   | <b>DO NOT READ]</b> Don't know / No answer |
| REFUSED                                                                                         | 9                   | <b>DO NOT READ]</b> Refused                |

|                                                           |                        |                                            |
|-----------------------------------------------------------|------------------------|--------------------------------------------|
| <b>MBI_10</b>                                             | <b>MBI_EMOTSEV_MSI</b> |                                            |
| <b>[ASK IF MBI_EMOT_MSI = Yes]</b>                        |                        |                                            |
| How would you describe the severity of this behaviour...? |                        |                                            |
| <b>CODE ONLY ONE RESPONSE</b>                             |                        |                                            |
| MILD                                                      | 1                      | Mild                                       |
| MOD                                                       | 2                      | Moderate                                   |
| SEVERE                                                    | 3                      | Severe                                     |
| DK_NA                                                     | 8                      | <b>DO NOT READ]</b> Don't know / No answer |
| REFUSED                                                   | 9                      | <b>DO NOT READ]</b> Refused                |





|                                            |   |              |   |                                            |   |   |   |   |    |    |    |    |    |    |
|--------------------------------------------|---|--------------|---|--------------------------------------------|---|---|---|---|----|----|----|----|----|----|
| 1                                          | 2 | 3            | 4 | 5                                          | 6 | 7 | 8 | 9 | 10 | 11 | 12 | 13 | 14 | 15 |
| MBI_11                                     |   | MBI_CARE_MSI |   |                                            |   |   |   |   |    |    |    |    |    |    |
| [ALWAYS ASK]                               |   |              |   |                                            |   |   |   |   |    |    |    |    |    |    |
| Does she/he no longer care about anything? |   |              |   |                                            |   |   |   |   |    |    |    |    |    |    |
| YES                                        |   | 1            |   | Yes                                        |   |   |   |   |    |    |    |    |    |    |
| NO                                         |   | 2            |   | No                                         |   |   |   |   |    |    |    |    |    |    |
| DK_NA                                      |   | 8            |   | <b>DO NOT READ]</b> Don't know / No answer |   |   |   |   |    |    |    |    |    |    |
| REFUSED                                    |   | 9            |   | <b>DO NOT READ]</b> Refused                |   |   |   |   |    |    |    |    |    |    |

|                                                           |    |                 |    |                                            |    |    |    |    |    |    |    |    |    |    |
|-----------------------------------------------------------|----|-----------------|----|--------------------------------------------|----|----|----|----|----|----|----|----|----|----|
| 16                                                        | 17 | 18              | 19 | 20                                         | 21 | 22 | 23 | 24 | 25 | 26 | 27 | 28 | 29 | 30 |
| MBI_12                                                    |    | MBI_CARESEV_MSI |    |                                            |    |    |    |    |    |    |    |    |    |    |
| [ASK IF MBI_CARE_MSI = Yes]                               |    |                 |    |                                            |    |    |    |    |    |    |    |    |    |    |
| How would you describe the severity of this behaviour...? |    |                 |    |                                            |    |    |    |    |    |    |    |    |    |    |
| <b>CODE ONLY ONE RESPONSE</b>                             |    |                 |    |                                            |    |    |    |    |    |    |    |    |    |    |
| MILD                                                      |    | 1               |    | Mild                                       |    |    |    |    |    |    |    |    |    |    |
| MOD                                                       |    | 2               |    | Moderate                                   |    |    |    |    |    |    |    |    |    |    |
| SEVERE                                                    |    | 3               |    | Severe                                     |    |    |    |    |    |    |    |    |    |    |
| DK_NA                                                     |    | 8               |    | <b>DO NOT READ]</b> Don't know / No answer |    |    |    |    |    |    |    |    |    |    |
| REFUSED                                                   |    | 9               |    | <b>DO NOT READ]</b> Refused                |    |    |    |    |    |    |    |    |    |    |

The second domain describes mood or anxiety symptoms.

**Interviewer note, remind the respondent if required:** For each questions you respond “yes” to indicating a change in behaviour, I will ask you to respond about the severity of the behaviour based on the following options:

- 1) Mild where the change in behaviour is noticeable, but not a significant change;
- 2) Moderate where the change in behaviour is significant, but not a dramatic change;
- 3) Severe where the change in behaviour is marked or prominent, a dramatic change.

If there is more than one behaviour listed in a question, please rate the most severe behavioural change.

|                                                                                                            |    |             |    |                                            |    |    |    |    |    |    |    |    |    |    |
|------------------------------------------------------------------------------------------------------------|----|-------------|----|--------------------------------------------|----|----|----|----|----|----|----|----|----|----|
| 43                                                                                                         | 44 | 45          | 46 | 47                                         | 48 | 49 | 50 | 51 | 52 | 53 | 54 | 55 | 56 | 57 |
| MBI_13                                                                                                     |    | MBI_SAD_MSI |    |                                            |    |    |    |    |    |    |    |    |    |    |
| [ALWAYS ASK]                                                                                               |    |             |    |                                            |    |    |    |    |    |    |    |    |    |    |
| Has the person developed sadness or appear to be in low spirits? Does she/he have episodes of tearfulness? |    |             |    |                                            |    |    |    |    |    |    |    |    |    |    |
| YES                                                                                                        |    | 1           |    | Yes                                        |    |    |    |    |    |    |    |    |    |    |
| NO                                                                                                         |    | 2           |    | No                                         |    |    |    |    |    |    |    |    |    |    |
| DK_NA                                                                                                      |    | 8           |    | <b>DO NOT READ]</b> Don't know / No answer |    |    |    |    |    |    |    |    |    |    |
| REFUSED                                                                                                    |    | 9           |    | <b>DO NOT READ]</b> Refused                |    |    |    |    |    |    |    |    |    |    |



**CLSA Memory Study Informant Questionnaire**  
v1.1, 2022 October 12

|                                                           |   |                       |   |                                           |   |   |   |   |    |    |    |    |    |    |    |    |
|-----------------------------------------------------------|---|-----------------------|---|-------------------------------------------|---|---|---|---|----|----|----|----|----|----|----|----|
| 1                                                         | 2 | 3                     | 4 | 5                                         | 6 | 7 | 8 | 9 | 10 | 11 | 12 | 13 | 14 | 15 | 16 | 17 |
| <b>MBI_14</b>                                             |   | <b>MBI_SADSEV_MSI</b> |   |                                           |   |   |   |   |    |    |    |    |    |    |    |    |
| <b>[ASK IF MBI_SAD_MSI = Yes]</b>                         |   |                       |   |                                           |   |   |   |   |    |    |    |    |    |    |    |    |
| How would you describe the severity of this behaviour...? |   |                       |   |                                           |   |   |   |   |    |    |    |    |    |    |    |    |
| <b>CODE ONLY ONE RESPONSE</b>                             |   |                       |   |                                           |   |   |   |   |    |    |    |    |    |    |    |    |
| MILD                                                      |   | 1                     |   | Mild                                      |   |   |   |   |    |    |    |    |    |    |    |    |
| MOD                                                       |   | 2                     |   | Moderate                                  |   |   |   |   |    |    |    |    |    |    |    |    |
| SEVERE                                                    |   | 3                     |   | Severe                                    |   |   |   |   |    |    |    |    |    |    |    |    |
| DK_NA                                                     |   | 8                     |   | <b>DO NOT READ</b> Don't know / No answer |   |   |   |   |    |    |    |    |    |    |    |    |
| REFUSED                                                   |   | 9                     |   | <b>DO NOT READ</b> Refused                |   |   |   |   |    |    |    |    |    |    |    |    |

|                                                         |    |                     |    |                                           |    |    |    |    |    |    |    |    |    |    |
|---------------------------------------------------------|----|---------------------|----|-------------------------------------------|----|----|----|----|----|----|----|----|----|----|
| 18                                                      | 19 | 20                  | 21 | 22                                        | 23 | 24 | 25 | 26 | 27 | 28 | 29 | 30 | 31 | 32 |
| <b>MBI_15</b>                                           |    | <b>MBI_PLES_MSI</b> |    |                                           |    |    |    |    |    |    |    |    |    |    |
| <b>[ALWAYS ASK]</b>                                     |    |                     |    |                                           |    |    |    |    |    |    |    |    |    |    |
| Has the person become less able to experience pleasure? |    |                     |    |                                           |    |    |    |    |    |    |    |    |    |    |
| YES                                                     |    | 1                   |    | Yes                                       |    |    |    |    |    |    |    |    |    |    |
| NO                                                      |    | 2                   |    | No                                        |    |    |    |    |    |    |    |    |    |    |
| DK_NA                                                   |    | 8                   |    | <b>DO NOT READ</b> Don't know / No answer |    |    |    |    |    |    |    |    |    |    |
| REFUSED                                                 |    | 9                   |    | <b>DO NOT READ</b> Refused                |    |    |    |    |    |    |    |    |    |    |

|                                                           |    |                        |    |                                           |    |    |    |    |    |    |    |    |    |    |    |    |    |    |    |    |    |    |    |    |    |    |    |
|-----------------------------------------------------------|----|------------------------|----|-------------------------------------------|----|----|----|----|----|----|----|----|----|----|----|----|----|----|----|----|----|----|----|----|----|----|----|
| 33                                                        | 34 | 35                     | 36 | 37                                        | 38 | 39 | 40 | 41 | 42 | 43 | 44 | 45 | 46 | 47 | 48 | 49 | 50 | 51 | 52 | 53 | 54 | 55 | 56 | 57 | 58 | 59 | 60 |
| <b>MBI_16</b>                                             |    | <b>MBI_PLESSEV_MSI</b> |    |                                           |    |    |    |    |    |    |    |    |    |    |    |    |    |    |    |    |    |    |    |    |    |    |    |
| <b>[ASK IF MBI_PLES_MSI = Yes]</b>                        |    |                        |    |                                           |    |    |    |    |    |    |    |    |    |    |    |    |    |    |    |    |    |    |    |    |    |    |    |
| How would you describe the severity of this behaviour...? |    |                        |    |                                           |    |    |    |    |    |    |    |    |    |    |    |    |    |    |    |    |    |    |    |    |    |    |    |
| <b>CODE ONLY ONE RESPONSE</b>                             |    |                        |    |                                           |    |    |    |    |    |    |    |    |    |    |    |    |    |    |    |    |    |    |    |    |    |    |    |
| MILD                                                      |    | 1                      |    | Mild                                      |    |    |    |    |    |    |    |    |    |    |    |    |    |    |    |    |    |    |    |    |    |    |    |
| MOD                                                       |    | 2                      |    | Moderate                                  |    |    |    |    |    |    |    |    |    |    |    |    |    |    |    |    |    |    |    |    |    |    |    |
| SEVERE                                                    |    | 3                      |    | Severe                                    |    |    |    |    |    |    |    |    |    |    |    |    |    |    |    |    |    |    |    |    |    |    |    |
| DK_NA                                                     |    | 8                      |    | <b>DO NOT READ</b> Don't know / No answer |    |    |    |    |    |    |    |    |    |    |    |    |    |    |    |    |    |    |    |    |    |    |    |
| REFUSED                                                   |    | 9                      |    | <b>DO NOT READ</b> Refused                |    |    |    |    |    |    |    |    |    |    |    |    |    |    |    |    |    |    |    |    |    |    |    |



|                                                                                        |   |                     |   |                                            |   |   |   |   |    |    |    |    |    |    |
|----------------------------------------------------------------------------------------|---|---------------------|---|--------------------------------------------|---|---|---|---|----|----|----|----|----|----|
| 1                                                                                      | 2 | 3                   | 4 | 5                                          | 6 | 7 | 8 | 9 | 10 | 11 | 12 | 13 | 14 | 15 |
| <b>MBI_17</b>                                                                          |   | <b>MBI_DISC_MSI</b> |   |                                            |   |   |   |   |    |    |    |    |    |    |
| <b>[ALWAYS ASK]</b>                                                                    |   |                     |   |                                            |   |   |   |   |    |    |    |    |    |    |
| Has the person become discouraged about their future or feel that she/he is a failure? |   |                     |   |                                            |   |   |   |   |    |    |    |    |    |    |
| YES                                                                                    |   | 1                   |   | Yes                                        |   |   |   |   |    |    |    |    |    |    |
| NO                                                                                     |   | 2                   |   | No                                         |   |   |   |   |    |    |    |    |    |    |
| DK_NA                                                                                  |   | 8                   |   | <b>DO NOT READ]</b> Don't know / No answer |   |   |   |   |    |    |    |    |    |    |
| REFUSED                                                                                |   | 9                   |   | <b>DO NOT READ]</b> Refused                |   |   |   |   |    |    |    |    |    |    |

|                                                           |    |                        |    |                                            |    |    |    |    |    |    |    |    |    |    |
|-----------------------------------------------------------|----|------------------------|----|--------------------------------------------|----|----|----|----|----|----|----|----|----|----|
| 16                                                        | 17 | 18                     | 19 | 20                                         | 21 | 22 | 23 | 24 | 25 | 26 | 27 | 28 | 29 | 30 |
| <b>MBI_18</b>                                             |    | <b>MBI_DISCSEV_MSI</b> |    |                                            |    |    |    |    |    |    |    |    |    |    |
| <b>[ASK IF MBI_DISC_MSI = Yes]</b>                        |    |                        |    |                                            |    |    |    |    |    |    |    |    |    |    |
| How would you describe the severity of this behaviour...? |    |                        |    |                                            |    |    |    |    |    |    |    |    |    |    |
| <b>CODE ONLY ONE RESPONSE</b>                             |    |                        |    |                                            |    |    |    |    |    |    |    |    |    |    |
| MILD                                                      |    | 1                      |    | Mild                                       |    |    |    |    |    |    |    |    |    |    |
| MOD                                                       |    | 2                      |    | Moderate                                   |    |    |    |    |    |    |    |    |    |    |
| SEVERE                                                    |    | 3                      |    | Severe                                     |    |    |    |    |    |    |    |    |    |    |
| DK_NA                                                     |    | 8                      |    | <b>DO NOT READ]</b> Don't know / No answer |    |    |    |    |    |    |    |    |    |    |
| REFUSED                                                   |    | 9                      |    | <b>DO NOT READ]</b> Refused                |    |    |    |    |    |    |    |    |    |    |

|                                                             |    |                     |    |                                            |    |    |    |    |    |    |    |    |    |    |
|-------------------------------------------------------------|----|---------------------|----|--------------------------------------------|----|----|----|----|----|----|----|----|----|----|
| 31                                                          | 32 | 33                  | 34 | 35                                         | 36 | 37 | 38 | 39 | 40 | 41 | 42 | 43 | 44 | 45 |
| <b>MBI_19</b>                                               |    | <b>MBI_BURD_MSI</b> |    |                                            |    |    |    |    |    |    |    |    |    |    |
| <b>[ALWAYS ASK]</b>                                         |    |                     |    |                                            |    |    |    |    |    |    |    |    |    |    |
| Does the person view herself/himself as a burden to family? |    |                     |    |                                            |    |    |    |    |    |    |    |    |    |    |
| YES                                                         |    | 1                   |    | Yes                                        |    |    |    |    |    |    |    |    |    |    |
| NO                                                          |    | 2                   |    | No                                         |    |    |    |    |    |    |    |    |    |    |
| DK_NA                                                       |    | 8                   |    | <b>DO NOT READ]</b> Don't know / No answer |    |    |    |    |    |    |    |    |    |    |
| REFUSED                                                     |    | 9                   |    | <b>DO NOT READ]</b> Refused                |    |    |    |    |    |    |    |    |    |    |



**CLSA Memory Study Informant Questionnaire**  
v1.1, 2022 October 12

|                                                           |                        |                                           |
|-----------------------------------------------------------|------------------------|-------------------------------------------|
| <b>MBI_20</b>                                             | <b>MBI_BURDSEV_MSI</b> |                                           |
| <b>[ASK IF MBI_BURD_MSI = Yes]</b>                        |                        |                                           |
| How would you describe the severity of this behaviour...? |                        |                                           |
| <b>CODE ONLY ONE RESPONSE</b>                             |                        |                                           |
| MILD                                                      | 1                      | Mild                                      |
| MOD                                                       | 2                      | Moderate                                  |
| SEVERE                                                    | 3                      | Severe                                    |
| DK_NA                                                     | 8                      | <b>DO NOT READ</b> Don't know / No answer |
| REFUSED                                                   | 9                      | <b>DO NOT READ</b> Refused                |

|                                                                                                          |                    |                                           |
|----------------------------------------------------------------------------------------------------------|--------------------|-------------------------------------------|
| <b>MBI_21</b>                                                                                            | <b>MBI_ANX_MSI</b> |                                           |
| <b>[ALWAYS ASK]</b>                                                                                      |                    |                                           |
| Has the person become more anxious or worried about things that are routine (e.g. events, visits, etc.)? |                    |                                           |
| YES                                                                                                      | 1                  | Yes                                       |
| NO                                                                                                       | 2                  | No                                        |
| DK_NA                                                                                                    | 8                  | <b>DO NOT READ</b> Don't know / No answer |
| REFUSED                                                                                                  | 9                  | <b>DO NOT READ</b> Refused                |

|                                                           |                       |                                           |
|-----------------------------------------------------------|-----------------------|-------------------------------------------|
| <b>MBI_22</b>                                             | <b>MBI_ANXSEV_MSI</b> |                                           |
| <b>[ASK IF MBI_ANX_MSI = Yes]</b>                         |                       |                                           |
| How would you describe the severity of this behaviour...? |                       |                                           |
| <b>CODE ONLY ONE RESPONSE</b>                             |                       |                                           |
| MILD                                                      | 1                     | Mild                                      |
| MOD                                                       | 2                     | Moderate                                  |
| SEVERE                                                    | 3                     | Severe                                    |
| DK_NA                                                     | 8                     | <b>DO NOT READ</b> Don't know / No answer |
| REFUSED                                                   | 9                     | <b>DO NOT READ</b> Refused                |



|                                                                                                              |   |                      |   |                                            |   |   |   |   |    |    |    |    |    |    |
|--------------------------------------------------------------------------------------------------------------|---|----------------------|---|--------------------------------------------|---|---|---|---|----|----|----|----|----|----|
| 1                                                                                                            | 2 | 3                    | 4 | 5                                          | 6 | 7 | 8 | 9 | 10 | 11 | 12 | 13 | 14 | 15 |
| <b>MBI_23</b>                                                                                                |   | <b>MBI_TENSE_MSI</b> |   |                                            |   |   |   |   |    |    |    |    |    |    |
| <b>[ALWAYS ASK]</b>                                                                                          |   |                      |   |                                            |   |   |   |   |    |    |    |    |    |    |
| Does the person feel very tense, having developed an inability to relax, or shakiness, or symptoms of panic? |   |                      |   |                                            |   |   |   |   |    |    |    |    |    |    |
| YES                                                                                                          |   | 1                    |   | Yes                                        |   |   |   |   |    |    |    |    |    |    |
| NO                                                                                                           |   | 2                    |   | No                                         |   |   |   |   |    |    |    |    |    |    |
| DK_NA                                                                                                        |   | 8                    |   | <b>DO NOT READ]</b> Don't know / No answer |   |   |   |   |    |    |    |    |    |    |
| REFUSED                                                                                                      |   | 9                    |   | <b>DO NOT READ]</b> Refused                |   |   |   |   |    |    |    |    |    |    |

|                                                           |    |                         |    |                                            |    |    |    |    |    |    |    |    |    |    |    |    |
|-----------------------------------------------------------|----|-------------------------|----|--------------------------------------------|----|----|----|----|----|----|----|----|----|----|----|----|
| 16                                                        | 17 | 18                      | 19 | 20                                         | 21 | 22 | 23 | 24 | 25 | 26 | 27 | 28 | 29 | 30 | 31 | 32 |
| <b>MBI_24</b>                                             |    | <b>MBI_TENSESEV_MSI</b> |    |                                            |    |    |    |    |    |    |    |    |    |    |    |    |
| <b>[ASK IF MBI_TENSE_MSI = Yes]</b>                       |    |                         |    |                                            |    |    |    |    |    |    |    |    |    |    |    |    |
| How would you describe the severity of this behaviour...? |    |                         |    |                                            |    |    |    |    |    |    |    |    |    |    |    |    |
| <b>CODE ONLY ONE RESPONSE</b>                             |    |                         |    |                                            |    |    |    |    |    |    |    |    |    |    |    |    |
| MILD                                                      |    | 1                       |    | Mild                                       |    |    |    |    |    |    |    |    |    |    |    |    |
| MOD                                                       |    | 2                       |    | Moderate                                   |    |    |    |    |    |    |    |    |    |    |    |    |
| SEVERE                                                    |    | 3                       |    | Severe                                     |    |    |    |    |    |    |    |    |    |    |    |    |
| DK_NA                                                     |    | 8                       |    | <b>DO NOT READ]</b> Don't know / No answer |    |    |    |    |    |    |    |    |    |    |    |    |
| REFUSED                                                   |    | 9                       |    | <b>DO NOT READ]</b> Refused                |    |    |    |    |    |    |    |    |    |    |    |    |

The third domain describes the ability to delay gratification and control behaviour, impulses, oral intake and/or changes in reward.

**Interviewer note, remind the respondent if required:** For each questions you respond "yes" to indicating a change in behaviour, I will ask you to respond about the severity of the behaviour based on the following options:

- 1) Mild where the change in behaviour is noticeable, but not a significant change;
- 2) Moderate where the change in behaviour is significant, but not a dramatic change;
- 3) Severe where the change in behaviour is marked or prominent, a dramatic change.

If there is more than one behaviour listed in a question, please rate the most severe behavioural change.

|                                                                          |    |                     |    |                                            |    |    |    |    |    |    |    |    |    |    |    |
|--------------------------------------------------------------------------|----|---------------------|----|--------------------------------------------|----|----|----|----|----|----|----|----|----|----|----|
| 45                                                                       | 46 | 47                  | 48 | 49                                         | 50 | 51 | 52 | 53 | 54 | 55 | 56 | 57 | 58 | 59 | 60 |
| <b>MBI_25</b>                                                            |    | <b>MBI_AGGR_MSI</b> |    |                                            |    |    |    |    |    |    |    |    |    |    |    |
| <b>[ALWAYS ASK]</b>                                                      |    |                     |    |                                            |    |    |    |    |    |    |    |    |    |    |    |
| Has the person become agitated, aggressive, irritable, or temperamental? |    |                     |    |                                            |    |    |    |    |    |    |    |    |    |    |    |
| YES                                                                      |    | 1                   |    | Yes                                        |    |    |    |    |    |    |    |    |    |    |    |
| NO                                                                       |    | 2                   |    | No                                         |    |    |    |    |    |    |    |    |    |    |    |
| DK_NA                                                                    |    | 8                   |    | <b>DO NOT READ]</b> Don't know / No answer |    |    |    |    |    |    |    |    |    |    |    |
| REFUSED                                                                  |    | 9                   |    | <b>DO NOT READ]</b> Refused                |    |    |    |    |    |    |    |    |    |    |    |



**CLSA Memory Study Informant Questionnaire**  
v1.1, 2022 October 12

|                                                           |                        |                                            |
|-----------------------------------------------------------|------------------------|--------------------------------------------|
| <b>MBI_26</b>                                             | <b>MBI_AGGRSEV_MSI</b> |                                            |
| <b>[ASK IF MBI_AGGR_MSI = Yes]</b>                        |                        |                                            |
| How would you describe the severity of this behaviour...? |                        |                                            |
| <b>CODE ONLY ONE RESPONSE</b>                             |                        |                                            |
| MILD                                                      | 1                      | Mild                                       |
| MOD                                                       | 2                      | Moderate                                   |
| SEVERE                                                    | 3                      | Severe                                     |
| DK_NA                                                     | 8                      | <b>DO NOT READ]</b> Don't know / No answer |
| REFUSED                                                   | 9                      | <b>DO NOT READ]</b> Refused                |

|                                                                       |                     |                                            |
|-----------------------------------------------------------------------|---------------------|--------------------------------------------|
| <b>MBI_27</b>                                                         | <b>MBI_ARGU_MSI</b> |                                            |
| <b>[ALWAYS ASK]</b>                                                   |                     |                                            |
| Has she/he become unreasonably or uncharacteristically argumentative? |                     |                                            |
| YES                                                                   | 1                   | Yes                                        |
| NO                                                                    | 2                   | No                                         |
| DK_NA                                                                 | 8                   | <b>DO NOT READ]</b> Don't know / No answer |
| REFUSED                                                               | 9                   | <b>DO NOT READ]</b> Refused                |

|                                                           |                        |                                            |
|-----------------------------------------------------------|------------------------|--------------------------------------------|
| <b>MBI_28</b>                                             | <b>MBI_ARGUSEV_MSI</b> |                                            |
| <b>[ASK IF MBI_ARGU_MSI = Yes]</b>                        |                        |                                            |
| How would you describe the severity of this behaviour...? |                        |                                            |
| <b>CODE ONLY ONE RESPONSE</b>                             |                        |                                            |
| MILD                                                      | 1                      | Mild                                       |
| MOD                                                       | 2                      | Moderate                                   |
| SEVERE                                                    | 3                      | Severe                                     |
| DK_NA                                                     | 8                      | <b>DO NOT READ]</b> Don't know / No answer |
| REFUSED                                                   | 9                      | <b>DO NOT READ]</b> Refused                |



|                                                                                  |   |                     |   |                                            |   |   |   |   |    |    |    |    |    |    |
|----------------------------------------------------------------------------------|---|---------------------|---|--------------------------------------------|---|---|---|---|----|----|----|----|----|----|
| 1                                                                                | 2 | 3                   | 4 | 5                                          | 6 | 7 | 8 | 9 | 10 | 11 | 12 | 13 | 14 | 15 |
| <b>MBI_29</b>                                                                    |   | <b>MBI_IMPU_MSI</b> |   |                                            |   |   |   |   |    |    |    |    |    |    |
| <b>[ALWAYS ASK]</b>                                                              |   |                     |   |                                            |   |   |   |   |    |    |    |    |    |    |
| Has the person become more impulsive, seeming to act without considering things? |   |                     |   |                                            |   |   |   |   |    |    |    |    |    |    |
| YES                                                                              |   | 1                   |   | Yes                                        |   |   |   |   |    |    |    |    |    |    |
| NO                                                                               |   | 2                   |   | No                                         |   |   |   |   |    |    |    |    |    |    |
| DK_NA                                                                            |   | 8                   |   | <b>DO NOT READ]</b> Don't know / No answer |   |   |   |   |    |    |    |    |    |    |
| REFUSED                                                                          |   | 9                   |   | <b>DO NOT READ]</b> Refused                |   |   |   |   |    |    |    |    |    |    |

|                                                           |    |                        |    |                                            |    |    |    |    |    |    |    |    |    |    |
|-----------------------------------------------------------|----|------------------------|----|--------------------------------------------|----|----|----|----|----|----|----|----|----|----|
| 16                                                        | 17 | 18                     | 19 | 20                                         | 21 | 22 | 23 | 24 | 25 | 26 | 27 | 28 | 29 | 30 |
| <b>MBI_20</b>                                             |    | <b>MBI_IMPUSEV_MSI</b> |    |                                            |    |    |    |    |    |    |    |    |    |    |
| <b>[ASK IF MBI_IMPU_MSI = Yes]</b>                        |    |                        |    |                                            |    |    |    |    |    |    |    |    |    |    |
| How would you describe the severity of this behaviour...? |    |                        |    |                                            |    |    |    |    |    |    |    |    |    |    |
| <b>CODE ONLY ONE RESPONSE</b>                             |    |                        |    |                                            |    |    |    |    |    |    |    |    |    |    |
| MILD                                                      |    | 1                      |    | Mild                                       |    |    |    |    |    |    |    |    |    |    |
| MOD                                                       |    | 2                      |    | Moderate                                   |    |    |    |    |    |    |    |    |    |    |
| SEVERE                                                    |    | 3                      |    | Severe                                     |    |    |    |    |    |    |    |    |    |    |
| DK_NA                                                     |    | 8                      |    | <b>DO NOT READ]</b> Don't know / No answer |    |    |    |    |    |    |    |    |    |    |
| REFUSED                                                   |    | 9                      |    | <b>DO NOT READ]</b> Refused                |    |    |    |    |    |    |    |    |    |    |

|                                                                                                                                                                                                |    |                     |    |                                            |    |    |    |    |    |    |    |    |    |    |
|------------------------------------------------------------------------------------------------------------------------------------------------------------------------------------------------|----|---------------------|----|--------------------------------------------|----|----|----|----|----|----|----|----|----|----|
| 31                                                                                                                                                                                             | 32 | 33                  | 34 | 35                                         | 36 | 37 | 38 | 39 | 40 | 41 | 42 | 43 | 44 | 45 |
| <b>MBI_31</b>                                                                                                                                                                                  |    | <b>MBI_DISI_MSI</b> |    |                                            |    |    |    |    |    |    |    |    |    |    |
| <b>[ALWAYS ASK]</b>                                                                                                                                                                            |    |                     |    |                                            |    |    |    |    |    |    |    |    |    |    |
| Does the person display sexually disinhibited or intrusive behaviour, such as touching (themselves/others), hugging, groping, etc., in a manner that is out of character or may cause offense? |    |                     |    |                                            |    |    |    |    |    |    |    |    |    |    |
| YES                                                                                                                                                                                            |    | 1                   |    | Yes                                        |    |    |    |    |    |    |    |    |    |    |
| NO                                                                                                                                                                                             |    | 2                   |    | No                                         |    |    |    |    |    |    |    |    |    |    |
| DK_NA                                                                                                                                                                                          |    | 8                   |    | <b>DO NOT READ]</b> Don't know / No answer |    |    |    |    |    |    |    |    |    |    |
| REFUSED                                                                                                                                                                                        |    | 9                   |    | <b>DO NOT READ]</b> Refused                |    |    |    |    |    |    |    |    |    |    |



**CLSA Memory Study Informant Questionnaire**  
v1.1, 2022 October 12

|                                                           |                        |                                           |
|-----------------------------------------------------------|------------------------|-------------------------------------------|
| <b>MBI_32</b>                                             | <b>MBI_DISISEV_MSI</b> |                                           |
| <b>[ASK IF MBI_DISI_MSI = Yes]</b>                        |                        |                                           |
| How would you describe the severity of this behaviour...? |                        |                                           |
| <b>CODE ONLY ONE RESPONSE</b>                             |                        |                                           |
| MILD                                                      | 1                      | Mild                                      |
| MOD                                                       | 2                      | Moderate                                  |
| SEVERE                                                    | 3                      | Severe                                    |
| DK_NA                                                     | 8                      | <b>DO NOT READ</b> Don't know / No answer |
| REFUSED                                                   | 9                      | <b>DO NOT READ</b> Refused                |

|                                                                                                                                                   |                     |                                           |
|---------------------------------------------------------------------------------------------------------------------------------------------------|---------------------|-------------------------------------------|
| <b>MBI_33</b>                                                                                                                                     | <b>MBI_FRUS_MSI</b> |                                           |
| <b>[ALWAYS ASK]</b>                                                                                                                               |                     |                                           |
| Has the person become more easily frustrated or impatient? Does she/he have troubles coping with delays, or waiting for events or for their turn? |                     |                                           |
| YES                                                                                                                                               | 1                   | Yes                                       |
| NO                                                                                                                                                | 2                   | No                                        |
| DK_NA                                                                                                                                             | 8                   | <b>DO NOT READ</b> Don't know / No answer |
| REFUSED                                                                                                                                           | 9                   | <b>DO NOT READ</b> Refused                |

|                                                           |                        |                                           |
|-----------------------------------------------------------|------------------------|-------------------------------------------|
| <b>MBI_34</b>                                             | <b>MBI_FRUSSEV_MSI</b> |                                           |
| <b>[ASK IF MBI_FRUS_MSI = Yes]</b>                        |                        |                                           |
| How would you describe the severity of this behaviour...? |                        |                                           |
| <b>CODE ONLY ONE RESPONSE</b>                             |                        |                                           |
| MILD                                                      | 1                      | Mild                                      |
| MOD                                                       | 2                      | Moderate                                  |
| SEVERE                                                    | 3                      | Severe                                    |
| DK_NA                                                     | 8                      | <b>DO NOT READ</b> Don't know / No answer |
| REFUSED                                                   | 9                      | <b>DO NOT READ</b> Refused                |





|                                                                                                                                            |   |                      |   |                                            |   |   |   |   |    |    |    |    |    |    |
|--------------------------------------------------------------------------------------------------------------------------------------------|---|----------------------|---|--------------------------------------------|---|---|---|---|----|----|----|----|----|----|
| 1                                                                                                                                          | 2 | 3                    | 4 | 5                                          | 6 | 7 | 8 | 9 | 10 | 11 | 12 | 13 | 14 | 15 |
| <b>MBI_35</b>                                                                                                                              |   | <b>MBI_DRIVE_MSI</b> |   |                                            |   |   |   |   |    |    |    |    |    |    |
| <b>[ALWAYS ASK]</b>                                                                                                                        |   |                      |   |                                            |   |   |   |   |    |    |    |    |    |    |
| Does the person display a new recklessness or lack of judgement when driving (e.g. speeding, erratic swerving, abrupt lane changes, etc.)? |   |                      |   |                                            |   |   |   |   |    |    |    |    |    |    |
| YES                                                                                                                                        |   | 1                    |   | Yes                                        |   |   |   |   |    |    |    |    |    |    |
| NO                                                                                                                                         |   | 2                    |   | No                                         |   |   |   |   |    |    |    |    |    |    |
| DK_NA                                                                                                                                      |   | 8                    |   | <b>DO NOT READ]</b> Don't know / No answer |   |   |   |   |    |    |    |    |    |    |
| REFUSED                                                                                                                                    |   | 9                    |   | <b>DO NOT READ]</b> Refused                |   |   |   |   |    |    |    |    |    |    |

|                                                           |    |                         |    |                                            |    |    |    |    |    |    |    |    |    |    |
|-----------------------------------------------------------|----|-------------------------|----|--------------------------------------------|----|----|----|----|----|----|----|----|----|----|
| 16                                                        | 17 | 18                      | 19 | 20                                         | 21 | 22 | 23 | 24 | 25 | 26 | 27 | 28 | 29 | 30 |
| <b>MBI_36</b>                                             |    | <b>MBI_DRIVESEV_MSI</b> |    |                                            |    |    |    |    |    |    |    |    |    |    |
| <b>[ASK IF MBI_DRIVE_MSI = Yes]</b>                       |    |                         |    |                                            |    |    |    |    |    |    |    |    |    |    |
| How would you describe the severity of this behaviour...? |    |                         |    |                                            |    |    |    |    |    |    |    |    |    |    |
| <b>CODE ONLY ONE RESPONSE</b>                             |    |                         |    |                                            |    |    |    |    |    |    |    |    |    |    |
| MILD                                                      |    | 1                       |    | Mild                                       |    |    |    |    |    |    |    |    |    |    |
| MOD                                                       |    | 2                       |    | Moderate                                   |    |    |    |    |    |    |    |    |    |    |
| SEVERE                                                    |    | 3                       |    | Severe                                     |    |    |    |    |    |    |    |    |    |    |
| DK_NA                                                     |    | 8                       |    | <b>DO NOT READ]</b> Don't know / No answer |    |    |    |    |    |    |    |    |    |    |
| REFUSED                                                   |    | 9                       |    | <b>DO NOT READ]</b> Refused                |    |    |    |    |    |    |    |    |    |    |

|                                                                                                                                                      |    |                     |    |                                            |    |    |    |    |    |    |    |    |    |    |
|------------------------------------------------------------------------------------------------------------------------------------------------------|----|---------------------|----|--------------------------------------------|----|----|----|----|----|----|----|----|----|----|
| 31                                                                                                                                                   | 32 | 33                  | 34 | 35                                         | 36 | 37 | 38 | 39 | 40 | 41 | 42 | 43 | 44 | 45 |
| <b>MBI_37</b>                                                                                                                                        |    | <b>MBI_STUB_MSI</b> |    |                                            |    |    |    |    |    |    |    |    |    |    |
| <b>[ALWAYS ASK]</b>                                                                                                                                  |    |                     |    |                                            |    |    |    |    |    |    |    |    |    |    |
| Has the person become more stubborn or rigid, i.e., uncharacteristically insistent on having their way, or unwilling/unable to see/hear other views? |    |                     |    |                                            |    |    |    |    |    |    |    |    |    |    |
| YES                                                                                                                                                  |    | 1                   |    | Yes                                        |    |    |    |    |    |    |    |    |    |    |
| NO                                                                                                                                                   |    | 2                   |    | No                                         |    |    |    |    |    |    |    |    |    |    |
| DK_NA                                                                                                                                                |    | 8                   |    | <b>DO NOT READ]</b> Don't know / No answer |    |    |    |    |    |    |    |    |    |    |
| REFUSED                                                                                                                                              |    | 9                   |    | <b>DO NOT READ]</b> Refused                |    |    |    |    |    |    |    |    |    |    |



**CLSA Memory Study Informant Questionnaire**  
v1.1, 2022 October 12

|                                                           |                        |                                            |
|-----------------------------------------------------------|------------------------|--------------------------------------------|
| <b>MBI_38</b>                                             | <b>MBI_STUBSEV_MSI</b> |                                            |
| <b>[ASK IF MBI_STUB_MSI = Yes]</b>                        |                        |                                            |
| How would you describe the severity of this behaviour...? |                        |                                            |
| <b>CODE ONLY ONE RESPONSE</b>                             |                        |                                            |
| MILD                                                      | 1                      | Mild                                       |
| MOD                                                       | 2                      | Moderate                                   |
| SEVERE                                                    | 3                      | Severe                                     |
| DK_NA                                                     | 8                      | <b>DO NOT READ]</b> Don't know / No answer |
| REFUSED                                                   | 9                      | <b>DO NOT READ]</b> Refused                |

|                                                                                                                                                                       |                     |                                            |
|-----------------------------------------------------------------------------------------------------------------------------------------------------------------------|---------------------|--------------------------------------------|
| <b>MBI_39</b>                                                                                                                                                         | <b>MBI_FOOD_MSI</b> |                                            |
| <b>[ALWAYS ASK]</b>                                                                                                                                                   |                     |                                            |
| Is there a change in eating behaviours (e.g., overeating, cramming the mouth, insistent on eating only specific foods, or eating the food in exactly the same order)? |                     |                                            |
| YES                                                                                                                                                                   | 1                   | Yes                                        |
| NO                                                                                                                                                                    | 2                   | No                                         |
| DK_NA                                                                                                                                                                 | 8                   | <b>DO NOT READ]</b> Don't know / No answer |
| REFUSED                                                                                                                                                               | 9                   | <b>DO NOT READ]</b> Refused                |

|                                                           |                        |                                            |
|-----------------------------------------------------------|------------------------|--------------------------------------------|
| <b>MBI_40</b>                                             | <b>MBI_FOODSEV_MSI</b> |                                            |
| <b>[ASK IF MBI_FOOD_MSI = Yes]</b>                        |                        |                                            |
| How would you describe the severity of this behaviour...? |                        |                                            |
| <b>CODE ONLY ONE RESPONSE</b>                             |                        |                                            |
| MILD                                                      | 1                      | Mild                                       |
| MOD                                                       | 2                      | Moderate                                   |
| SEVERE                                                    | 3                      | Severe                                     |
| DK_NA                                                     | 8                      | <b>DO NOT READ]</b> Don't know / No answer |
| REFUSED                                                   | 9                      | <b>DO NOT READ]</b> Refused                |



|                                                                                  |   |                    |   |                                            |   |   |   |   |    |    |    |    |    |    |
|----------------------------------------------------------------------------------|---|--------------------|---|--------------------------------------------|---|---|---|---|----|----|----|----|----|----|
| 1                                                                                | 2 | 3                  | 4 | 5                                          | 6 | 7 | 8 | 9 | 10 | 11 | 12 | 13 | 14 | 15 |
| <b>MBI_41</b>                                                                    |   | <b>MBI_APP_MSI</b> |   |                                            |   |   |   |   |    |    |    |    |    |    |
| <b>[ALWAYS ASK]</b>                                                              |   |                    |   |                                            |   |   |   |   |    |    |    |    |    |    |
| Does the person no longer find food tasteful or enjoyable? Are they eating less? |   |                    |   |                                            |   |   |   |   |    |    |    |    |    |    |
| YES                                                                              |   | 1                  |   | Yes                                        |   |   |   |   |    |    |    |    |    |    |
| NO                                                                               |   | 2                  |   | No                                         |   |   |   |   |    |    |    |    |    |    |
| DK_NA                                                                            |   | 8                  |   | <b>DO NOT READ]</b> Don't know / No answer |   |   |   |   |    |    |    |    |    |    |
| REFUSED                                                                          |   | 9                  |   | <b>DO NOT READ]</b> Refused                |   |   |   |   |    |    |    |    |    |    |

|                                                           |    |                       |    |                                            |    |    |    |    |    |    |    |    |    |    |
|-----------------------------------------------------------|----|-----------------------|----|--------------------------------------------|----|----|----|----|----|----|----|----|----|----|
| 16                                                        | 17 | 18                    | 19 | 20                                         | 21 | 22 | 23 | 24 | 25 | 26 | 27 | 28 | 29 | 30 |
| <b>MBI_42</b>                                             |    | <b>MBI_APPSEV_MSI</b> |    |                                            |    |    |    |    |    |    |    |    |    |    |
| <b>[ASK IF MBI_APP_MSI = Yes]</b>                         |    |                       |    |                                            |    |    |    |    |    |    |    |    |    |    |
| How would you describe the severity of this behaviour...? |    |                       |    |                                            |    |    |    |    |    |    |    |    |    |    |
| <b>CODE ONLY ONE RESPONSE</b>                             |    |                       |    |                                            |    |    |    |    |    |    |    |    |    |    |
| MILD                                                      |    | 1                     |    | Mild                                       |    |    |    |    |    |    |    |    |    |    |
| MOD                                                       |    | 2                     |    | Moderate                                   |    |    |    |    |    |    |    |    |    |    |
| SEVERE                                                    |    | 3                     |    | Severe                                     |    |    |    |    |    |    |    |    |    |    |
| DK_NA                                                     |    | 8                     |    | <b>DO NOT READ]</b> Don't know / No answer |    |    |    |    |    |    |    |    |    |    |
| REFUSED                                                   |    | 9                     |    | <b>DO NOT READ]</b> Refused                |    |    |    |    |    |    |    |    |    |    |

|                                                                 |    |                      |    |                                            |    |    |    |    |    |    |    |    |    |    |
|-----------------------------------------------------------------|----|----------------------|----|--------------------------------------------|----|----|----|----|----|----|----|----|----|----|
| 31                                                              | 32 | 33                   | 34 | 35                                         | 36 | 37 | 38 | 39 | 40 | 41 | 42 | 43 | 44 | 45 |
| <b>MBI_43</b>                                                   |    | <b>MBI_HOARD_MSI</b> |    |                                            |    |    |    |    |    |    |    |    |    |    |
| <b>[ALWAYS ASK]</b>                                             |    |                      |    |                                            |    |    |    |    |    |    |    |    |    |    |
| Does the person hoard objects when she/he did not do so before? |    |                      |    |                                            |    |    |    |    |    |    |    |    |    |    |
| YES                                                             |    | 1                    |    | Yes                                        |    |    |    |    |    |    |    |    |    |    |
| NO                                                              |    | 2                    |    | No                                         |    |    |    |    |    |    |    |    |    |    |
| DK_NA                                                           |    | 8                    |    | <b>DO NOT READ]</b> Don't know / No answer |    |    |    |    |    |    |    |    |    |    |
| REFUSED                                                         |    | 9                    |    | <b>DO NOT READ]</b> Refused                |    |    |    |    |    |    |    |    |    |    |



**CLSA Memory Study Informant Questionnaire**  
v1.1, 2022 October 12

|                                                           |                         |                                           |
|-----------------------------------------------------------|-------------------------|-------------------------------------------|
| <b>MBI_44</b>                                             | <b>MBI_HOARDSEV_MSI</b> |                                           |
| <b>[ASK IF MBI_HOARD_MSI = Yes]</b>                       |                         |                                           |
| How would you describe the severity of this behaviour...? |                         |                                           |
| <b>CODE ONLY ONE RESPONSE</b>                             |                         |                                           |
| MILD                                                      | 1                       | Mild                                      |
| MOD                                                       | 2                       | Moderate                                  |
| SEVERE                                                    | 3                       | Severe                                    |
| DK_NA                                                     | 8                       | <b>DO NOT READ</b> Don't know / No answer |
| REFUSED                                                   | 9                       | <b>DO NOT READ</b> Refused                |

|                                                                       |                    |                                           |
|-----------------------------------------------------------------------|--------------------|-------------------------------------------|
| <b>MBI_45</b>                                                         | <b>MBI_REP_MSI</b> |                                           |
| <b>[ALWAYS ASK]</b>                                                   |                    |                                           |
| Has the person developed simple repetitive behaviours or compulsions? |                    |                                           |
| YES                                                                   | 1                  | Yes                                       |
| NO                                                                    | 2                  | No                                        |
| DK_NA                                                                 | 8                  | <b>DO NOT READ</b> Don't know / No answer |
| REFUSED                                                               | 9                  | <b>DO NOT READ</b> Refused                |

|                                                           |                       |                                           |
|-----------------------------------------------------------|-----------------------|-------------------------------------------|
| <b>MBI_46</b>                                             | <b>MBI_REPSEV_MSI</b> |                                           |
| <b>[ASK IF MBI_REP_MSI = Yes]</b>                         |                       |                                           |
| How would you describe the severity of this behaviour...? |                       |                                           |
| <b>CODE ONLY ONE RESPONSE</b>                             |                       |                                           |
| MILD                                                      | 1                     | Mild                                      |
| MOD                                                       | 2                     | Moderate                                  |
| SEVERE                                                    | 3                     | Severe                                    |
| DK_NA                                                     | 8                     | <b>DO NOT READ</b> Don't know / No answer |
| REFUSED                                                   | 9                     | <b>DO NOT READ</b> Refused                |

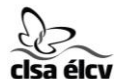

|   |                                                                                                                         |                     |                                            |
|---|-------------------------------------------------------------------------------------------------------------------------|---------------------|--------------------------------------------|
| 1 | <b>MBI_47</b>                                                                                                           | <b>MBI_REGU_MSI</b> |                                            |
| 2 | <b>[ALWAYS ASK]</b>                                                                                                     |                     |                                            |
| 3 | Has the person recently developed trouble regulating smoking, alcohol, drug intake or gambling, or started shoplifting? |                     |                                            |
| 4 | YES                                                                                                                     | 1                   | Yes                                        |
| 5 | NO                                                                                                                      | 2                   | No                                         |
| 6 | DK_NA                                                                                                                   | 8                   | <b>DO NOT READ]</b> Don't know / No answer |
| 7 | REFUSED                                                                                                                 | 9                   | <b>DO NOT READ]</b> Refused                |

|    |                                                           |                        |                                            |
|----|-----------------------------------------------------------|------------------------|--------------------------------------------|
| 16 | <b>MBI_48</b>                                             | <b>MBI_REGUSEV_MSI</b> |                                            |
| 17 | <b>[ASK IF MBI_REGU_MSI = Yes]</b>                        |                        |                                            |
| 18 | How would you describe the severity of this behaviour...? |                        |                                            |
| 19 | <b>CODE ONLY ONE RESPONSE</b>                             |                        |                                            |
| 20 | MILD                                                      | 1                      | Mild                                       |
| 21 | MOD                                                       | 2                      | Moderate                                   |
| 22 | SEVERE                                                    | 3                      | Severe                                     |
| 23 | DK_NA                                                     | 8                      | <b>DO NOT READ]</b> Don't know / No answer |
| 24 | REFUSED                                                   | 9                      | <b>DO NOT READ]</b> Refused                |

The next domain describes following society norms and having social graces, tact, and empathy.

**Interviewer note, remind the respondent if required:** For each questions you respond “yes” to indicating a change in behaviour, I will ask you to respond about the severity of the behaviour based on the following options:

- 1) Mild where the change in behaviour is noticeable, but not a significant change;
- 2) Moderate where the change in behaviour is significant, but not a dramatic change;

Severe where the change in behaviour is marked or prominent, a dramatic change. If there is more than one behaviour listed in a question, please rate the most severe behavioural change.

|    |                                                                                                                                           |                      |                                            |
|----|-------------------------------------------------------------------------------------------------------------------------------------------|----------------------|--------------------------------------------|
| 44 | <b>MBI_49</b>                                                                                                                             | <b>MBI_INSEN_MSI</b> |                                            |
| 45 | <b>[ALWAYS ASK]</b>                                                                                                                       |                      |                                            |
| 46 | Has the person become less concerned about how her/his words or actions affect others? Has she/he become insensitive to others' feelings? |                      |                                            |
| 47 | YES                                                                                                                                       | 1                    | Yes                                        |
| 48 | NO                                                                                                                                        | 2                    | No                                         |
| 49 | DK_NA                                                                                                                                     | 8                    | <b>DO NOT READ]</b> Don't know / No answer |
| 50 | REFUSED                                                                                                                                   | 9                    | <b>DO NOT READ]</b> Refused                |



**CLSA Memory Study Informant Questionnaire**  
v1.1, 2022 October 12

|                                                           |                         |                                            |
|-----------------------------------------------------------|-------------------------|--------------------------------------------|
| <b>MBI_50</b>                                             | <b>MBI_INSENSEV_MSI</b> |                                            |
| <b>[ASK IF MBI_INSEN_MSI = Yes]</b>                       |                         |                                            |
| How would you describe the severity of this behaviour...? |                         |                                            |
| <b>CODE ONLY ONE RESPONSE</b>                             |                         |                                            |
| MILD                                                      | 1                       | Mild                                       |
| MOD                                                       | 2                       | Moderate                                   |
| SEVERE                                                    | 3                       | Severe                                     |
| DK_NA                                                     | 8                       | <b>DO NOT READ]</b> Don't know / No answer |
| REFUSED                                                   | 9                       | <b>DO NOT READ]</b> Refused                |

|                                                                                                               |                     |                                            |
|---------------------------------------------------------------------------------------------------------------|---------------------|--------------------------------------------|
| <b>MBI_51</b>                                                                                                 | <b>MBI_OPEN_MSI</b> |                                            |
| <b>[ALWAYS ASK]</b>                                                                                           |                     |                                            |
| Has the person started talking openly about very personal or private matters not usually discussed in public? |                     |                                            |
| YES                                                                                                           | 1                   | Yes                                        |
| NO                                                                                                            | 2                   | No                                         |
| DK_NA                                                                                                         | 8                   | <b>DO NOT READ]</b> Don't know / No answer |
| REFUSED                                                                                                       | 9                   | <b>DO NOT READ]</b> Refused                |

|                                                           |                        |                                            |
|-----------------------------------------------------------|------------------------|--------------------------------------------|
| <b>MBI_52</b>                                             | <b>MBI_OPENSEV_MSI</b> |                                            |
| <b>[ASK IF MBI_OPEN_MSI = Yes]</b>                        |                        |                                            |
| How would you describe the severity of this behaviour...? |                        |                                            |
| <b>CODE ONLY ONE RESPONSE</b>                             |                        |                                            |
| MILD                                                      | 1                      | Mild                                       |
| MOD                                                       | 2                      | Moderate                                   |
| SEVERE                                                    | 3                      | Severe                                     |
| DK_NA                                                     | 8                      | <b>DO NOT READ]</b> Don't know / No answer |
| REFUSED                                                   | 9                      | <b>DO NOT READ]</b> Refused                |



|                                                                                                              |   |                     |   |                                            |   |   |   |   |    |    |    |    |    |    |
|--------------------------------------------------------------------------------------------------------------|---|---------------------|---|--------------------------------------------|---|---|---|---|----|----|----|----|----|----|
| 1                                                                                                            | 2 | 3                   | 4 | 5                                          | 6 | 7 | 8 | 9 | 10 | 11 | 12 | 13 | 14 | 15 |
| <b>MBI_53</b>                                                                                                |   | <b>MBI_RUDE_MSI</b> |   |                                            |   |   |   |   |    |    |    |    |    |    |
| <b>[ALWAYS ASK]</b>                                                                                          |   |                     |   |                                            |   |   |   |   |    |    |    |    |    |    |
| Does the person say rude or crude things or make lewd sexual remarks that she/he would not have said before? |   |                     |   |                                            |   |   |   |   |    |    |    |    |    |    |
| YES                                                                                                          |   | 1                   |   | Yes                                        |   |   |   |   |    |    |    |    |    |    |
| NO                                                                                                           |   | 2                   |   | No                                         |   |   |   |   |    |    |    |    |    |    |
| DK_NA                                                                                                        |   | 8                   |   | <b>DO NOT READ]</b> Don't know / No answer |   |   |   |   |    |    |    |    |    |    |
| REFUSED                                                                                                      |   | 9                   |   | <b>DO NOT READ]</b> Refused                |   |   |   |   |    |    |    |    |    |    |

|                                                           |    |                        |    |                                            |    |    |    |    |    |    |    |    |    |    |
|-----------------------------------------------------------|----|------------------------|----|--------------------------------------------|----|----|----|----|----|----|----|----|----|----|
| 16                                                        | 17 | 18                     | 19 | 20                                         | 21 | 22 | 23 | 24 | 25 | 26 | 27 | 28 | 29 | 30 |
| <b>MBI_54</b>                                             |    | <b>MBI_RUDESEV_MSI</b> |    |                                            |    |    |    |    |    |    |    |    |    |    |
| <b>[ASK IF MBI_RUDE_MSI = Yes]</b>                        |    |                        |    |                                            |    |    |    |    |    |    |    |    |    |    |
| How would you describe the severity of this behaviour...? |    |                        |    |                                            |    |    |    |    |    |    |    |    |    |    |
| <b>CODE ONLY ONE RESPONSE</b>                             |    |                        |    |                                            |    |    |    |    |    |    |    |    |    |    |
| MILD                                                      |    | 1                      |    | Mild                                       |    |    |    |    |    |    |    |    |    |    |
| MOD                                                       |    | 2                      |    | Moderate                                   |    |    |    |    |    |    |    |    |    |    |
| SEVERE                                                    |    | 3                      |    | Severe                                     |    |    |    |    |    |    |    |    |    |    |
| DK_NA                                                     |    | 8                      |    | <b>DO NOT READ]</b> Don't know / No answer |    |    |    |    |    |    |    |    |    |    |
| REFUSED                                                   |    | 9                      |    | <b>DO NOT READ]</b> Refused                |    |    |    |    |    |    |    |    |    |    |

|                                                                                                                                  |    |                      |    |                                            |    |    |    |    |    |    |    |    |    |    |
|----------------------------------------------------------------------------------------------------------------------------------|----|----------------------|----|--------------------------------------------|----|----|----|----|----|----|----|----|----|----|
| 31                                                                                                                               | 32 | 33                   | 34 | 35                                         | 36 | 37 | 38 | 39 | 40 | 41 | 42 | 43 | 44 | 45 |
| <b>MBI_55</b>                                                                                                                    |    | <b>MBI_JUDGE_MSI</b> |    |                                            |    |    |    |    |    |    |    |    |    |    |
| <b>[ALWAYS ASK]</b>                                                                                                              |    |                      |    |                                            |    |    |    |    |    |    |    |    |    |    |
| Does the person seem to lack the social judgement she/he previously had about what to say or how to behave in public or private? |    |                      |    |                                            |    |    |    |    |    |    |    |    |    |    |
| YES                                                                                                                              |    | 1                    |    | Yes                                        |    |    |    |    |    |    |    |    |    |    |
| NO                                                                                                                               |    | 2                    |    | No                                         |    |    |    |    |    |    |    |    |    |    |
| DK_NA                                                                                                                            |    | 8                    |    | <b>DO NOT READ]</b> Don't know / No answer |    |    |    |    |    |    |    |    |    |    |
| REFUSED                                                                                                                          |    | 9                    |    | <b>DO NOT READ]</b> Refused                |    |    |    |    |    |    |    |    |    |    |



**CLSA Memory Study Informant Questionnaire**  
v1.1, 2022 October 12

|                                                           |                         |                                            |
|-----------------------------------------------------------|-------------------------|--------------------------------------------|
| <b>MBI_56</b>                                             | <b>MBI_JUDGESEV_MSI</b> |                                            |
| <b>[ASK IF MBI_JUDGE_MSI = Yes]</b>                       |                         |                                            |
| How would you describe the severity of this behaviour...? |                         |                                            |
| <b>CODE ONLY ONE RESPONSE</b>                             |                         |                                            |
| MILD                                                      | 1                       | Mild                                       |
| MOD                                                       | 2                       | Moderate                                   |
| SEVERE                                                    | 3                       | Severe                                     |
| DK_NA                                                     | 8                       | <b>DO NOT READ]</b> Don't know / No answer |
| REFUSED                                                   | 9                       | <b>DO NOT READ]</b> Refused                |

|                                                                                       |                     |                                            |
|---------------------------------------------------------------------------------------|---------------------|--------------------------------------------|
| <b>MBI_57</b>                                                                         | <b>MBI_TALK_MSI</b> |                                            |
| <b>[ALWAYS ASK]</b>                                                                   |                     |                                            |
| Does the person now talk to strangers as if familiar, or intrude on their activities? |                     |                                            |
| YES                                                                                   | 1                   | Yes                                        |
| NO                                                                                    | 2                   | No                                         |
| DK_NA                                                                                 | 8                   | <b>DO NOT READ]</b> Don't know / No answer |
| REFUSED                                                                               | 9                   | <b>DO NOT READ]</b> Refused                |

|                                                           |                        |                                            |
|-----------------------------------------------------------|------------------------|--------------------------------------------|
| <b>MBI_58</b>                                             | <b>MBI_TALKSEV_MSI</b> |                                            |
| <b>[ASK IF MBI_TALK_MSI = Yes]</b>                        |                        |                                            |
| How would you describe the severity of this behaviour...? |                        |                                            |
| <b>CODE ONLY ONE RESPONSE</b>                             |                        |                                            |
| MILD                                                      | 1                      | Mild                                       |
| MOD                                                       | 2                      | Moderate                                   |
| SEVERE                                                    | 3                      | Severe                                     |
| DK_NA                                                     | 8                      | <b>DO NOT READ]</b> Don't know / No answer |
| REFUSED                                                   | 9                      | <b>DO NOT READ]</b> Refused                |





This last domain describes strongly held beliefs and sensory experiences.

**Interviewer note, remind the respondent if required:** For each questions you respond “yes” to indicating a change in behaviour, I will ask you to respond about the severity of the behaviour based on the following options:

- 1) Mild where the change in behaviour is noticeable, but not a significant change;
- 2) Moderate where the change in behaviour is significant, but not a dramatic change;
- 3) Severe where the change in behaviour is marked or prominent, a dramatic change.

If there is more than one behaviour listed in a question, please rate the most severe behavioural change.

| MBI_59                                                                                                                        | MBI_HARM_MSI |                                            |
|-------------------------------------------------------------------------------------------------------------------------------|--------------|--------------------------------------------|
| <b>[ALWAYS ASK]</b>                                                                                                           |              |                                            |
| Has the person developed beliefs that they are in danger, or that others are planning to harm them or steal their belongings? |              |                                            |
| YES                                                                                                                           | 1            | Yes                                        |
| NO                                                                                                                            | 2            | No                                         |
| DK_NA                                                                                                                         | 8            | <b>DO NOT READ]</b> Don't know / No answer |
| REFUSED                                                                                                                       | 9            | <b>DO NOT READ]</b> Refused                |

| MBI_60                                                    | MBI_HARMSEV_MSI |                                            |
|-----------------------------------------------------------|-----------------|--------------------------------------------|
| <b>[ASK IF MBI_HARM_MSI = Yes]</b>                        |                 |                                            |
| How would you describe the severity of this behaviour...? |                 |                                            |
| <b>CODE ONLY ONE RESPONSE</b>                             |                 |                                            |
| MILD                                                      | 1               | Mild                                       |
| MOD                                                       | 2               | Moderate                                   |
| SEVERE                                                    | 3               | Severe                                     |
| DK_NA                                                     | 8               | <b>DO NOT READ]</b> Don't know / No answer |
| REFUSED                                                   | 9               | <b>DO NOT READ]</b> Refused                |

| MBI_61                                                                                   | MBI_SUSP_MSI |                                            |
|------------------------------------------------------------------------------------------|--------------|--------------------------------------------|
| <b>[ALWAYS ASK]</b>                                                                      |              |                                            |
| Has the person developed suspiciousness about the intentions or motives of other people? |              |                                            |
| YES                                                                                      | 1            | Yes                                        |
| NO                                                                                       | 2            | No                                         |
| DK_NA                                                                                    | 8            | <b>DO NOT READ]</b> Don't know / No answer |
| REFUSED                                                                                  | 9            | <b>DO NOT READ]</b> Refused                |



**CLSA Memory Study Informant Questionnaire**  
v1.1, 2022 October 12

|                                                           |                        |                                            |
|-----------------------------------------------------------|------------------------|--------------------------------------------|
| <b>MBI_62</b>                                             | <b>MBI_SUSPSEV_MSI</b> |                                            |
| <b>[ASK IF MBI_SUSP_MSI = Yes]</b>                        |                        |                                            |
| How would you describe the severity of this behaviour...? |                        |                                            |
| <b>CODE ONLY ONE RESPONSE</b>                             |                        |                                            |
| MILD                                                      | 1                      | Mild                                       |
| MOD                                                       | 2                      | Moderate                                   |
| SEVERE                                                    | 3                      | Severe                                     |
| DK_NA                                                     | 8                      | <b>DO NOT READ]</b> Don't know / No answer |
| REFUSED                                                   | 9                      | <b>DO NOT READ]</b> Refused                |

|                                                                             |                     |                                            |
|-----------------------------------------------------------------------------|---------------------|--------------------------------------------|
| <b>MBI_63</b>                                                               | <b>MBI_UNRL_MSI</b> |                                            |
| <b>[ALWAYS ASK]</b>                                                         |                     |                                            |
| Doe she/he have unrealistic beliefs about her/his power, wealth, or skills? |                     |                                            |
| YES                                                                         | 1                   | Yes                                        |
| NO                                                                          | 2                   | No                                         |
| DK_NA                                                                       | 8                   | <b>DO NOT READ]</b> Don't know / No answer |
| REFUSED                                                                     | 9                   | <b>DO NOT READ]</b> Refused                |

|                                                           |                        |                                            |
|-----------------------------------------------------------|------------------------|--------------------------------------------|
| <b>MBI_64</b>                                             | <b>MBI_UNRLSEV_MSI</b> |                                            |
| <b>[ASK IF MBI_UNRL_MSI = Yes]</b>                        |                        |                                            |
| How would you describe the severity of this behaviour...? |                        |                                            |
| <b>CODE ONLY ONE RESPONSE</b>                             |                        |                                            |
| MILD                                                      | 1                      | Mild                                       |
| MOD                                                       | 2                      | Moderate                                   |
| SEVERE                                                    | 3                      | Severe                                     |
| DK_NA                                                     | 8                      | <b>DO NOT READ]</b> Don't know / No answer |
| REFUSED                                                   | 9                      | <b>DO NOT READ]</b> Refused                |



|                                                                                              |   |                      |   |                                            |   |   |   |   |    |    |    |    |    |    |
|----------------------------------------------------------------------------------------------|---|----------------------|---|--------------------------------------------|---|---|---|---|----|----|----|----|----|----|
| 1                                                                                            | 2 | 3                    | 4 | 5                                          | 6 | 7 | 8 | 9 | 10 | 11 | 12 | 13 | 14 | 15 |
| <b>MBI_65</b>                                                                                |   | <b>MBI_VOICE_MSI</b> |   |                                            |   |   |   |   |    |    |    |    |    |    |
| <b>[ALWAYS ASK]</b>                                                                          |   |                      |   |                                            |   |   |   |   |    |    |    |    |    |    |
| Does the person describe hearing voices or does she/he talk to imaginary people or “spirits” |   |                      |   |                                            |   |   |   |   |    |    |    |    |    |    |
| YES                                                                                          |   | 1                    |   | Yes                                        |   |   |   |   |    |    |    |    |    |    |
| NO                                                                                           |   | 2                    |   | No                                         |   |   |   |   |    |    |    |    |    |    |
| DK_NA                                                                                        |   | 8                    |   | <b>DO NOT READ]</b> Don't know / No answer |   |   |   |   |    |    |    |    |    |    |
| REFUSED                                                                                      |   | 9                    |   | <b>DO NOT READ]</b> Refused                |   |   |   |   |    |    |    |    |    |    |

|                                                           |    |                        |    |                                            |    |    |    |    |    |    |    |    |    |    |
|-----------------------------------------------------------|----|------------------------|----|--------------------------------------------|----|----|----|----|----|----|----|----|----|----|
| 16                                                        | 17 | 18                     | 19 | 20                                         | 21 | 22 | 23 | 24 | 25 | 26 | 27 | 28 | 29 | 30 |
| <b>MBI_66</b>                                             |    | <b>MBI_VOICSEV_MSI</b> |    |                                            |    |    |    |    |    |    |    |    |    |    |
| <b>[ASK IF MBI_VOICE_MSI = Yes]</b>                       |    |                        |    |                                            |    |    |    |    |    |    |    |    |    |    |
| How would you describe the severity of this behaviour...? |    |                        |    |                                            |    |    |    |    |    |    |    |    |    |    |
| <b>CODE ONLY ONE RESPONSE</b>                             |    |                        |    |                                            |    |    |    |    |    |    |    |    |    |    |
| MILD                                                      |    | 1                      |    | Mild                                       |    |    |    |    |    |    |    |    |    |    |
| MOD                                                       |    | 2                      |    | Moderate                                   |    |    |    |    |    |    |    |    |    |    |
| SEVERE                                                    |    | 3                      |    | Severe                                     |    |    |    |    |    |    |    |    |    |    |
| DK_NA                                                     |    | 8                      |    | <b>DO NOT READ]</b> Don't know / No answer |    |    |    |    |    |    |    |    |    |    |
| REFUSED                                                   |    | 9                      |    | <b>DO NOT READ]</b> Refused                |    |    |    |    |    |    |    |    |    |    |

|                                                                                                                                                                 |    |                     |    |                                            |    |    |    |    |    |    |    |    |    |    |
|-----------------------------------------------------------------------------------------------------------------------------------------------------------------|----|---------------------|----|--------------------------------------------|----|----|----|----|----|----|----|----|----|----|
| 31                                                                                                                                                              | 32 | 33                  | 34 | 35                                         | 36 | 37 | 38 | 39 | 40 | 41 | 42 | 43 | 44 | 45 |
| <b>MBI_67</b>                                                                                                                                                   |    | <b>MBI_IMAG_MSI</b> |    |                                            |    |    |    |    |    |    |    |    |    |    |
| <b>[ALWAYS ASK]</b>                                                                                                                                             |    |                     |    |                                            |    |    |    |    |    |    |    |    |    |    |
| Does the person report or complain about, or act as if seeing things (e.g. people, animals, or insects) that are not there, i.e., that are imaginary to others? |    |                     |    |                                            |    |    |    |    |    |    |    |    |    |    |
| YES                                                                                                                                                             |    | 1                   |    | Yes                                        |    |    |    |    |    |    |    |    |    |    |
| NO                                                                                                                                                              |    | 2                   |    | No                                         |    |    |    |    |    |    |    |    |    |    |
| DK_NA                                                                                                                                                           |    | 8                   |    | <b>DO NOT READ]</b> Don't know / No answer |    |    |    |    |    |    |    |    |    |    |
| REFUSED                                                                                                                                                         |    | 9                   |    | <b>DO NOT READ]</b> Refused                |    |    |    |    |    |    |    |    |    |    |

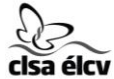

**CLSA Memory Study Informant Questionnaire**  
v1.1, 2022 October 12

|                                                           |   |                        |   |                                            |   |   |   |   |    |    |    |    |    |    |    |    |
|-----------------------------------------------------------|---|------------------------|---|--------------------------------------------|---|---|---|---|----|----|----|----|----|----|----|----|
| 1                                                         | 2 | 3                      | 4 | 5                                          | 6 | 7 | 8 | 9 | 10 | 11 | 12 | 13 | 14 | 15 | 16 | 17 |
| <b>MBI_68</b>                                             |   | <b>MBI_IMAGSEV_MSI</b> |   |                                            |   |   |   |   |    |    |    |    |    |    |    |    |
| <b>[ASK IF MBI_IMAG_MSI = Yes]</b>                        |   |                        |   |                                            |   |   |   |   |    |    |    |    |    |    |    |    |
| How would you describe the severity of this behaviour...? |   |                        |   |                                            |   |   |   |   |    |    |    |    |    |    |    |    |
| <b>CODE ONLY ONE RESPONSE</b>                             |   |                        |   |                                            |   |   |   |   |    |    |    |    |    |    |    |    |
| MILD                                                      |   | 1                      |   | Mild                                       |   |   |   |   |    |    |    |    |    |    |    |    |
| MOD                                                       |   | 2                      |   | Moderate                                   |   |   |   |   |    |    |    |    |    |    |    |    |
| SEVERE                                                    |   | 3                      |   | Severe                                     |   |   |   |   |    |    |    |    |    |    |    |    |
| DK_NA                                                     |   | 8                      |   | <b>DO NOT READ]</b> Don't know / No answer |   |   |   |   |    |    |    |    |    |    |    |    |
| REFUSED                                                   |   | 9                      |   | <b>DO NOT READ]</b> Refused                |   |   |   |   |    |    |    |    |    |    |    |    |

**MBI\_END**

For peer review only

**Supplementary Appendix 7 – Letter for participants with potential concerns about their cognition**

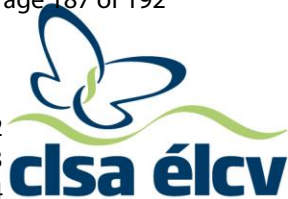

Canadian Longitudinal Study on Aging  
Étude longitudinale canadienne sur le vieillissement

Date

Dear [Participant name],

During your Data Collection Site visit for the Canadian Longitudinal Study on Aging (CLSA) Memory Study, our assessment identified a potential concern about your memory. We encourage you to discuss these results with your family physician. Please find below information that may be given to a physician to provide context for the examination result.

This person is a participant in the Canadian Longitudinal Study on Aging (CLSA) ([www.clsa/elcv.ca](http://www.clsa/elcv.ca)). The study is funded by the Canadian Institutes of Health Research (CIHR) and will involve 50,000 participants aged 45 to 85 years from across Canada who will be followed for up to 20 years.

The CLSA is conducting a substudy on the topic of memory funded by the Public Health Agency of Canada (PHAC). Participants in this study complete a clinical assessment done by a clinician specializing in geriatric psychiatry, neurology, or psychiatry with experience in cognitive assessment. The clinical assessment includes questions about the participant's medical history, a brief cognitive test, a neurocognitive examination, and observation of mobility. A family member or friend who knows the participant well answered questions regarding the participant's cognitive health, ability to complete daily tasks, and behaviour.

*The clinical assessment was completed for research purposes only and was not intended for clinical use.* One component of the clinical assessment was the administration of the Montreal Cognitive Assessment (MoCA) which is used to screen for potential cognitive problems. The participant score on the MoCA was \_\_\_\_\_. The interpretation of a MoCA score requires judgement by an experienced clinician who is aware of other aspects of the participant's health. A score itself does not indicate a specific diagnosis.

If you have any questions, please feel free to contact [Site Coordinator name or Site PI name as per DCS-specific protocol] at [phone number].

Sincerely,

[Clinician name]

**Parminder Raina, PhD**

Lead Principal Investigator

Department of Health  
Research Methods, Evidence,  
and Impact  
Faculty of Health Sciences

McMaster University

**Christina Wolfson, PhD**

Co-Principal Investigator

Department of Epidemiology,  
Biostatistics & Occupational  
Health and Department of  
Medicine

McGill University

**Susan Kirkland, PhD**

Co-Principal Investigator

Department of Community  
Health & Epidemiology and  
Department of Medicine

Dalhousie University

Supported by the Government  
of Canada through the  
Canadian Institutes of Health  
Research and the Canada  
Foundation for Innovation.

Appuyée par le gouvernement  
du Canada par l'entremise des  
Instituts de recherche en  
santé du Canada et de la  
Fondation canadienne pour  
l'innovation.

**Supplementary Appendix 8 – Letter for participants without potential concerns about their cognition**

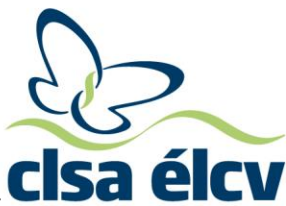

Canadian Longitudinal Study on Aging  
Étude longitudinale canadienne sur le vieillissement

Date

Dear [Participant name],

During your Data Collection Site visit for the Canadian Longitudinal Study on Aging (CLSA) Memory Study, our assessment did not identify any concerns about your memory. Please find below information that may be given to a physician to provide context for the examination result.

This person is a participant in the Canadian Longitudinal Study on Aging (CLSA) ([www.clsa/elcv.ca](http://www.clsa/elcv.ca)). The study is funded by the Canadian Institutes of Health Research (CIHR) and will involve 50,000 participants aged 45 to 85 years from across Canada who will be followed for up to 20 years.

The CLSA is conducting a substudy on the topic of memory funded by the Public Health Agency of Canada (PHAC). Participants in this study complete a clinical assessment done by a clinician specializing in geriatric psychiatry, neurology, or psychiatry with experience in cognitive assessment. The clinical assessment includes questions about the participant's medical history, a brief cognitive test, a neurocognitive examination, and observation of mobility. A family member or friend who knows the participant well answered questions regarding the participant's cognitive health, ability to complete daily tasks, and behaviour.

*The clinical assessment was completed for research purposes only and was not intended for clinical use.* One component of the clinical assessment was the administration of the Montreal Cognitive Assessment (MoCA) which is used to screen for potential cognitive problems. The participant score on the MoCA was \_\_\_\_\_. The interpretation of a MoCA score requires judgement by an experienced clinician who is aware of other aspects of the participant's health. A score itself does not indicate a specific diagnosis.

If you have any questions, please feel free to contact [Site Coordinator name or Site PI name as per DCS-specific protocol] at [phone number].

Sincerely,

[Clinician name]

1  
2  
3  
4  
5  
6  
7  
8  
9  
10 **Parminder Raina, PhD**  
11 Lead Principal Investigator  
12  
13 Department of Health  
14 Research Methods, Evidence,  
15 and Impact  
16 Faculty of Health Sciences  
17  
18  
19 **Christina Wolfson, PhD**  
20 Co-Principal Investigator  
21  
22 Department of Epidemiology,  
23 Biostatistics & Occupational  
24 Health and Department of  
25 Medicine  
26  
27  
28 **Susan Kirkland, PhD**  
29 Co-Principal Investigator  
30  
31 Department of Community  
32 Health & Epidemiology and  
33 Department of Medicine  
34  
35  
36  
37  
38  
39  
40  
41  
42  
43  
44  
45  
46  
47  
48  
49  
50 Supported by the Government  
of Canada through the  
51 Canadian Institutes of Health  
Research and the Canada  
52 Foundation for Innovation.  
53  
54 appuyée par le gouvernement  
55 du Canada par l'entremise des  
56 Instituts de recherche en  
57 santé du Canada et de la  
Fondation canadienne pour  
l'innovation.  
58  
59

Supplementary Appendix 9, Table 1 – DSM-5 Diagnostic criteria mapped on to CLSA data for mild NCD

| DSM-5 Diagnostic Criteria                                                                                                                                                                            | Components of algorithm in the CLSA                                             | Operationalization                                                                                                                                                                                                                   | Limitations                                                                                                                                                                                                                                                          |
|------------------------------------------------------------------------------------------------------------------------------------------------------------------------------------------------------|---------------------------------------------------------------------------------|--------------------------------------------------------------------------------------------------------------------------------------------------------------------------------------------------------------------------------------|----------------------------------------------------------------------------------------------------------------------------------------------------------------------------------------------------------------------------------------------------------------------|
| <b>A - Modest cognitive decline in one or more cognitive domains based on:</b><br><br><b>1) concern about mild decline, expressed by individual or reliable informant, or observed by clinicians</b> | Subjective cognitive decline                                                    | Responds "yes" to "Do you feel like your memory is becoming worse" and if yes, responds "strongly agree" or "agree" to "does this worry you?"                                                                                        | Questions not available at baseline                                                                                                                                                                                                                                  |
|                                                                                                                                                                                                      | Physician diagnosis of memory problem                                           | Responds "yes" to "Has a doctor ever told you that you have a memory problem"                                                                                                                                                        | Underestimates burden of memory problems                                                                                                                                                                                                                             |
|                                                                                                                                                                                                      | Multifactorial Memory Questionnaire                                             | Individual participant t-scores will be derived and interpreted based on the recommendations of the developer. Participants categorized as "low" or "very low" based on their t-score will be classified as having mild decline      | Questions not available at baseline                                                                                                                                                                                                                                  |
|                                                                                                                                                                                                      | <b>2) AND/OR modest impairment documented by objective cognitive assessment</b> | Performance on the Rey Auditory Verbal Learning Test (REY1 and REY2), the Animal Fluency Test (AFT2), and the Mental Alternation Test (MAT)                                                                                          | Mean Z score of >-2.0 but <1.5 on two or more cognitive tests                                                                                                                                                                                                        |
| <b>B - The cognitive deficits do not interfere with capacity for independence in everyday activities</b>                                                                                             | Instrumental Activities of Daily Living (IADL)                                  | Participant reports doing the following activities independently; grocery shopping, money management, housework, preparing meals, medication management, preparing meals, using telephone, getting to places out of walking distance | <b>x</b> Self-reported, ideal to have informant reported IADLs<br><b>x</b> Mobility, hearing, visions, and physical limitations may explain inability to complete IADLs independently. Basic Activities of Daily Living, self-rated and measured hearing/vision, and |

|                                                                                                                                                |                                                                                                                                |                                                                                                                                                                              |                                                                                                                                                                                                                                                                   |
|------------------------------------------------------------------------------------------------------------------------------------------------|--------------------------------------------------------------------------------------------------------------------------------|------------------------------------------------------------------------------------------------------------------------------------------------------------------------------|-------------------------------------------------------------------------------------------------------------------------------------------------------------------------------------------------------------------------------------------------------------------|
|                                                                                                                                                |                                                                                                                                |                                                                                                                                                                              | <p>physical function tests such as gait speed, the Timed Up and Go, Chair Rise test, balance, and grip strength will be explored to determine if reasons other than problems with cognition may explain the presence of IADL limitations.</p>                     |
| <p><b>C- The cognitive deficits do not occur exclusively in the context of a delirium</b></p>                                                  | <p>Assumed to not be present - participants being seen for a scheduled data collection visit are unlikely to have delirium</p> |                                                                                                                                                                              | <p>The CLSA does not collect this information</p>                                                                                                                                                                                                                 |
| <p><b>D - The cognitive deficits are not better explained by another mental disorders (e.g., major depressive disorder, schizophrenia)</b></p> | <p>The Centre for Epidemiological Studies Depression Scale (CESD-10)</p>                                                       | <p>Exclude participants who have a score of <math>\geq 10</math> indicating the presence of significant depressive symptoms</p>                                              | <p>May have both a cognitive disorder and a current mood disorder</p>                                                                                                                                                                                             |
|                                                                                                                                                | <p>Physician diagnosis of a mood disorder</p>                                                                                  | <p>Responds "yes" to "Has a doctor ever told you that you have a mood disorder such as depression (including manic depression), bipolar disorder, mania, or dysthymia? "</p> | <p>✗Without data on current mood (e.g., CESD-10 score), unclear if mood disorders are historic or active<br/>                 ✗Self-reported data may underestimate<br/>                 ✗May have both a cognitive disorder and a history of mood disorders.</p> |
| <p>Responds "yes" to "Has a doctor ever told you that you suffer from major depression?"</p>                                                   |                                                                                                                                |                                                                                                                                                                              |                                                                                                                                                                                                                                                                   |



Supplementary Appendix 9, Table 2 – DSM-5 Diagnostic criteria mapped on to CLSA data for major NCD

| DSM-5 Diagnostic Criteria                                                                                                                                                                                                                                                                                                                                                                                                                                                                 | Components of algorithm in the CLSA                                                                                                                                                                                                                                                                                                    | Operationalization                                                                                                                                                                                                   | Limitations                                                                                                                                                                                                                                                          |
|-------------------------------------------------------------------------------------------------------------------------------------------------------------------------------------------------------------------------------------------------------------------------------------------------------------------------------------------------------------------------------------------------------------------------------------------------------------------------------------------|----------------------------------------------------------------------------------------------------------------------------------------------------------------------------------------------------------------------------------------------------------------------------------------------------------------------------------------|----------------------------------------------------------------------------------------------------------------------------------------------------------------------------------------------------------------------|----------------------------------------------------------------------------------------------------------------------------------------------------------------------------------------------------------------------------------------------------------------------|
| <p><b>A – Evidence of significant cognitive decline from a previous level of performance in one or more cognitive domains (complex attention, executive function, learning and memory, language, perceptual-motor, or social cognition) based on:</b></p> <p><b>3) Concern of the individual, knowledgeable informant, or the clinician</b></p> <p><b>4) AND/OR substantial impairment in cognitive performance, preferably documented by standardized neuropsychological testing</b></p> | <p>Physician diagnosis of dementia or Alzheimer’s disease</p>                                                                                                                                                                                                                                                                          | <p>Responds "yes" to "Has a doctor ever told you that you have dementia or Alzheimer’s disease?"</p>                                                                                                                 | <p>Underestimates burden of memory problems</p>                                                                                                                                                                                                                      |
|                                                                                                                                                                                                                                                                                                                                                                                                                                                                                           | <p>All participants - Performance on the Rey Auditory Verbal Learning Test (REY1 and REY2), the Animal Fluency Test (AFT2), and the Mental Alternation Test (MAT)</p> <p>Comprehensive cohort participants - the Stroop test, Controlled Oral Word Association Test, and Miami Prospective Memory Tests will additionally be used.</p> | <p>Prescription for dementia-specific medication including cholinesterase inhibitor, or memantine</p> <p>Mean Z score of <math>\leq -2.0</math> on two or more cognitive tests</p>                                   | <p>Only aware of the medications provided to interviewer by participant</p> <p>x CLSA cognitive tests not designed to detect mild/major NCD</p> <p>x Missing data due to participant refusing test, technology issues, and other non-participant related factors</p> |
| <p><b>B - The cognitive deficits interfere with capacity for independence in everyday activities</b></p>                                                                                                                                                                                                                                                                                                                                                                                  | <p>Instrumental Activities of Daily Living (IADL)</p>                                                                                                                                                                                                                                                                                  | <p>Participant or proxy reports requiring assistance with one or more of the following activities; grocery shopping, money management, housework, preparing meals, medication management, preparing meals, using</p> | <p>x Self-reported, ideal to have informant reported IADLs</p> <p>x Mobility, hearing, visions, and physical limitations may explain inability to complete IADLs independently. Basic Activities of Daily Living, self-rated and</p>                                 |

|                                                                                                                                                |                                                                                                                                |                                                                                                                                                                                                                                                                           |                                                                                                                                                                                                                                                                             |
|------------------------------------------------------------------------------------------------------------------------------------------------|--------------------------------------------------------------------------------------------------------------------------------|---------------------------------------------------------------------------------------------------------------------------------------------------------------------------------------------------------------------------------------------------------------------------|-----------------------------------------------------------------------------------------------------------------------------------------------------------------------------------------------------------------------------------------------------------------------------|
|                                                                                                                                                |                                                                                                                                | <p>telephone, getting to places out of walking distance.</p>                                                                                                                                                                                                              | <p>measured hearing/vision, and physical function tests such as gait speed, the Timed Up and Go, Chair Rise test, balance, and grip strength will be explored to determine if reasons other than problems with cognition may explain the presences of IADL limitations.</p> |
| <p><b>C- The cognitive deficits do not occur exclusively in the context of a delirium</b></p>                                                  | <p>Assumed to not be present - participants being seen for a scheduled data collection visit are unlikely to have delirium</p> |                                                                                                                                                                                                                                                                           | <p>The CLSA does not collect this information</p>                                                                                                                                                                                                                           |
| <p><b>D - The cognitive deficits are not better explained by another mental disorders (e.g., major depressive disorder, schizophrenia)</b></p> | <p>The Centre for Epidemiological Studies Depression Scale (CESD-10)</p>                                                       | <p>Participant has a score of <math>\geq 10</math> indicating the presence of depressive symptoms</p>                                                                                                                                                                     | <p>May have both a cognitive disorder and a current mood disorder</p>                                                                                                                                                                                                       |
|                                                                                                                                                | <p>Physical diagnosis of a mood disorder</p>                                                                                   | <p>Responds "yes" to "Has a doctor ever told you that you have a mood disorder such as depression (including manic depression), bipolar disorder, mania, or dysthymia? "</p> <p>Responds "yes" to "Has a doctor ever told you that you suffer from major depression?"</p> | <p>✗Without data on current mood (e.g., CESD-10 score), unclear if mood disorders are historic or active</p> <p>✗Self-reported data may underestimate</p> <p>✗May have both a cognitive disorder and a current or history of mood disorder</p>                              |

**Supplementary Appendix 10 – Locally responsible research ethics boards**

- Université de Sherbrooke (Project ID 2009-18)
- Hamilton Integrated Research Ethics Board (Project ID 14406)
- Dalhousie University (Project ID 2010-2336)
- University of Manitoba (Project ID H2010:330), McGill University (Project ID A05-E59-10A)
- McGill University Health Centre Research Institute (Project ID: 2018-3497)
- Memorial University of Newfoundland (Project ID 11.003)
- University of Victoria (Project ID 11-320-C)
- Élisabeth Bruyère Research Institute of Ottawa (Project ID M16-10-023)
- University of British Columbia (Project ID H10-02143)
- Island Health (Formerly the Vancouver Island Health Authority, Project ID C2010-80)
- Simon Fraser University (Project ID 2010s0527)
- Calgary Conjoint Health Research Ethics Board (Project E-23489).

# BMJ Open

## Protocol for validating an algorithm to identify neurocognitive disorders in Canadian Longitudinal Study on Aging participants; an observational study

|                                 |                                                                                                                                                                                                                                                                                                                                                                                                                                                                                                                                                                                                                                                                                                                                                                                                                                                                                                                                                                                                                                                                                                                                                                                                                                                                                                                                                                                                                                                                                       |
|---------------------------------|---------------------------------------------------------------------------------------------------------------------------------------------------------------------------------------------------------------------------------------------------------------------------------------------------------------------------------------------------------------------------------------------------------------------------------------------------------------------------------------------------------------------------------------------------------------------------------------------------------------------------------------------------------------------------------------------------------------------------------------------------------------------------------------------------------------------------------------------------------------------------------------------------------------------------------------------------------------------------------------------------------------------------------------------------------------------------------------------------------------------------------------------------------------------------------------------------------------------------------------------------------------------------------------------------------------------------------------------------------------------------------------------------------------------------------------------------------------------------------------|
| Journal:                        | <i>BMJ Open</i>                                                                                                                                                                                                                                                                                                                                                                                                                                                                                                                                                                                                                                                                                                                                                                                                                                                                                                                                                                                                                                                                                                                                                                                                                                                                                                                                                                                                                                                                       |
| Manuscript ID                   | bmjopen-2023-073027.R1                                                                                                                                                                                                                                                                                                                                                                                                                                                                                                                                                                                                                                                                                                                                                                                                                                                                                                                                                                                                                                                                                                                                                                                                                                                                                                                                                                                                                                                                |
| Article Type:                   | Protocol                                                                                                                                                                                                                                                                                                                                                                                                                                                                                                                                                                                                                                                                                                                                                                                                                                                                                                                                                                                                                                                                                                                                                                                                                                                                                                                                                                                                                                                                              |
| Date Submitted by the Author:   | 27-Jul-2023                                                                                                                                                                                                                                                                                                                                                                                                                                                                                                                                                                                                                                                                                                                                                                                                                                                                                                                                                                                                                                                                                                                                                                                                                                                                                                                                                                                                                                                                           |
| Complete List of Authors:       | <p>Mayhew, Alexandra; McMaster University<br/> Hogan, David; University of Calgary; University of Calgary, Department of Medicine<br/> Raina, Parminder; McMaster University<br/> Wolfson, Christina; McGill University, Department of Epidemiology, Biostatistics and Occupational Health Department of Medicine; Research Institute of the McGill University Health Centre, Department of Epidemiology, Biostatistics and Occupational Health Department of Medicine<br/> Costa, Andrew P ; McMaster University<br/> Jones, Aaron; McMaster University<br/> Kirkland, Susan ; Dalhousie University, Department of Community Health &amp; Epidemiology<br/> O'Connell, Megan; University of Saskatchewan, Department of Psychology<br/> Taler, Vanessa; University of Ottawa; Bruyère Research Institute<br/> Smith, Eric E; University of Calgary, Department of Clinical Neurosciences<br/> Liu-Ambrose, Teresa; The University of British Columbia, Department of Physical Therapy; Vancouver Coastal Health Research Institute<br/> Ma, Jinhui; McMaster University, Department of Health Research Methods, Evidence, and Impact<br/> Thompson, Mary; University of Waterloo, Department of Statistics and Actuarial Science<br/> Wu, Changbao; University of Waterloo, Department of Statistics and Actuarial Science<br/> Chertkow, Howard; University of Toronto, Department of Medicine (Neurology); Rotman Research Institute<br/> Griffith, Lauren; Hamilton; Hamilton</p> |
| <b>Primary Subject Heading</b>: | Epidemiology                                                                                                                                                                                                                                                                                                                                                                                                                                                                                                                                                                                                                                                                                                                                                                                                                                                                                                                                                                                                                                                                                                                                                                                                                                                                                                                                                                                                                                                                          |
| Secondary Subject Heading:      | Geriatric medicine                                                                                                                                                                                                                                                                                                                                                                                                                                                                                                                                                                                                                                                                                                                                                                                                                                                                                                                                                                                                                                                                                                                                                                                                                                                                                                                                                                                                                                                                    |
| Keywords:                       | Dementia, Aging, PUBLIC HEALTH, EPIDEMIOLOGY                                                                                                                                                                                                                                                                                                                                                                                                                                                                                                                                                                                                                                                                                                                                                                                                                                                                                                                                                                                                                                                                                                                                                                                                                                                                                                                                                                                                                                          |
|                                 |                                                                                                                                                                                                                                                                                                                                                                                                                                                                                                                                                                                                                                                                                                                                                                                                                                                                                                                                                                                                                                                                                                                                                                                                                                                                                                                                                                                                                                                                                       |

1  
2  
3  
4  
5  
6  
7  
8  
9  
10  
11  
12  
13  
14  
15  
16  
17  
18  
19  
20  
21  
22  
23  
24  
25  
26  
27  
28  
29  
30  
31  
32  
33  
34  
35  
36  
37  
38  
39  
40  
41  
42  
43  
44  
45  
46  
47  
48  
49  
50  
51  
52  
53  
54  
55  
56  
57  
58  
59  
60

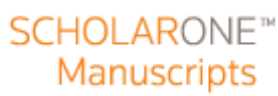

1  
2  
3  
4  
5  
6  
7  
8  
9  
10  
11 **Protocol for validating an algorithm to identify neurocognitive disorders in Canadian Longitudinal**  
12 **Study on Aging participants; an observational study**  
13  
14  
15

16 Alexandra J. Mayhew<sup>1,2,3</sup>, David B. Hogan<sup>4,5,6</sup>, Parminder Raina<sup>1,2,3</sup>, Christina Wolfson<sup>7</sup>, Andrew Costa<sup>1,8</sup>,  
17 Aaron Jones<sup>1,8</sup>, Susan Kirkland<sup>9</sup>, Megan E. O'Connell<sup>10</sup>, Vanessa Taler<sup>11,12</sup>, Eric E. Smith<sup>13</sup>, Teresa Liu-  
18 Ambrose<sup>14,15,16</sup>, Jinhui Ma<sup>1</sup>, Mary Thompson<sup>17</sup>, Changbao Wu<sup>17</sup>, Howard Chertkow<sup>18,19</sup>, Lauren E.  
19 Griffith<sup>1,2,3</sup> \* on behalf of the CLSA Memory Study Working Group  
20

21 \* Corresponding author  
22

- 23 1 Department of Health Research Methods, Evidence, and Impact, McMaster University, Hamilton,  
24 Ontario, Canada  
25 2 Labarge Centre for Mobility in Aging, Hamilton, Ontario, Canada  
26 3 McMaster Institute for Research on Aging, Hamilton, Ontario, Canada  
27 4 Brenda Strafford Centre on Aging, 'O'Brien Institute for Public Health, University of Calgary, Calgary,  
28 Alberta, Canada  
29 5 Department of Medicine, Cumming School of Medicine, University of Calgary, Calgary, Alberta,  
30 Canada  
31 6 Canadian Consortium on Neurodegeneration in Aging Investigator Member  
32 7 Department of Epidemiology, Biostatistics and Occupational Health, School of Population and Global  
33 Health & Department of Medicine, McGill University, Montreal, Canada & Research Institute of the  
34 McGill University Health Centre, McGill University, Montreal, Canada  
35 8 ICES, Toronto, Ontario, Canada  
36 9 Department of Community Health & Epidemiology and Division of Geriatric Medicine, Dalhousie  
37 University, Halifax, Canada  
38 10 Department of Psychology, University of Saskatchewan, Saskatoon, Saskatchewan, Canada.  
39 11 School of Psychology, University of Ottawa, Ottawa, Ontario, Canada  
40 12 Bruyère Research Institute, Ottawa, Ontario, Canada  
41 13 Department of Clinical Neurosciences and Hotchkiss Brain Institute, University of Calgary, Calgary,  
42 Alberta, Canada  
43 14 Department of Physical Therapy, University of British Columbia, Vancouver, British Columbia,  
44 Canada.  
45 15 Djavad Mowafaghian Centre for Brain Health, University of British Columbia, Vancouver, British  
46 Columbia, Canada  
47 16 Centre for Hip Health and Mobility, Vancouver Coastal Health Research Institute, Vancouver, British  
48 Columbia, Canada  
49 17 Department of Statistics and Actuarial Science, University of Waterloo, Waterloo, Ontario, Canada  
50 18 Department of Medicine (Neurology), University of Toronto, Toronto, Ontario, Canada  
51 19 Rotman Research Institute, Baycrest Health Sciences, Toronto, Ontario, Canada  
52  
53  
54  
55  
56  
57  
58  
59  
60

**Email addresses:**

Alexandra J. Mayhew: [mayhewaj@mcmaster.ca](mailto:mayhewaj@mcmaster.ca)

David B. Hogan: [dhogan@ucalgary.ca](mailto:dhogan@ucalgary.ca)

Parminder Raina: [praina@mcmaster.ca](mailto:praina@mcmaster.ca)

Christina Wolfson: [christina.wolfson@mcgill.ca](mailto:christina.wolfson@mcgill.ca)

Andrew Costa: [acosta@mcmaster.ca](mailto:acosta@mcmaster.ca)

Aaron Jones: [jonesa13@mcmaster.ca](mailto:jonesa13@mcmaster.ca)

Susan Kirkland: [susan.kirkland@dal.ca](mailto:susan.kirkland@dal.ca)

Megan E. O'Connell: [megan.oconnell@usask.ca](mailto:megan.oconnell@usask.ca)

Vanessa Taler: [vtaler@uottawa.ca](mailto:vtaler@uottawa.ca)

Eric E. Smith: [eesmith@ucalgary.ca](mailto:eesmith@ucalgary.ca)

Teresa Liu-Ambrose: [teresa.ambrose@ubc.ca](mailto:teresa.ambrose@ubc.ca)

Jinhui Ma: [maj26@mcmaster.ca](mailto:maj26@mcmaster.ca)

Mary Thompson: [methomps@uwaterloo.ca](mailto:methomps@uwaterloo.ca)

Changbao Wu: [cbwu@uwaterloo.ca](mailto:cbwu@uwaterloo.ca)

Howard Chertkow: [hchertkow@research.baycrest.org](mailto:hchertkow@research.baycrest.org)

Lauren E. Griffith: [griffith@mcmaster.ca](mailto:griffith@mcmaster.ca)

**Word count:** 3935

**ABSTRACT**

**Introduction:** In population-based research, disease ascertainment algorithms can be as accurate as, and less costly than, performing supplementary clinical examinations on selected participants to confirm a diagnosis of a neurocognitive disorder (NCD), but they require cohort-specific validation. To optimize the use of the Canadian Longitudinal Study on Aging (CLSA) to understand the epidemiology and burden of NCDs, the CLSA Memory Study will validate an NCD ascertainment algorithm to identify CLSA participants with these disorders using routinely acquired study data.

**Methods and analysis:** Up to 600 CLSA participants with equal numbers of those likely to have no NCD, mild NCD, or major NCD based on prior self-reported physician-diagnosis of a memory problem or dementia, medication consumption (i.e., cholinesterase inhibitors, memantine) and/or self-reported function will be recruited during the follow-up 3 CLSA evaluations (started August 2021). Participants will undergo an assessment by a study clinician who will also review an informant interview and make a preliminary determination of the presence or absence of an NCD. The clinical assessment and available CLSA data will be reviewed by a Central Review Panel who will make a final categorization of participants as having 1) no NCD; 2) mild NCD; or, 3) major NCD (according to DSM-5 criteria). These will be used as our gold standard diagnosis to determine if the NCD ascertainment algorithm accurately identifies CLSA participants with an NCD. Weighted Kappa statistics will be the primary measure of agreement. Sensitivity, specificity, the C-statistic, and the phi coefficient will also be estimated.

**Ethics and dissemination:** Ethics approval has been received from the institutional research ethics boards for each CLSA Data Collection Site (Université de Sherbrooke, Hamilton Integrated Research Ethics Board, Dalhousie University, Nova Scotia Health Research Ethics Board, University of Manitoba, McGill University, McGill University Health Centre Research Institute, Memorial University of Newfoundland, University of Victoria, Élisabeth Bruyère Research Institute of Ottawa, University of British Columbia, Island Health (Formerly the Vancouver Island Health Authority, Simon Fraser University, Calgary Conjoint Health Research Ethics Board).

1  
2  
3 The results of this work will be disseminated to public health professionals, researchers, health  
4 professionals, administrators and policy makers through journal publications, conference presentations,  
5 publicly available reports, and presentations to stakeholder groups.  
6

7 **Keywords:** CLSA, neurocognitive disorders, dementia, algorithm, validation  
8  
9

## 10 11 **ARTICLE SUMMARY** 12

- 13 • Validation of a neurocognitive disorder case ascertainment algorithm for the Canadian  
14 Longitudinal Study on Aging (CLSA) will allow use of this longitudinal and comprehensive  
15 database of this large population-based study to explore risk factors, early manifestations,  
16 etiology, and trajectory of these disorders.
- 17 • Two particular challenges being faced in ascertaining the presence of a neurocognitive disorder  
18 are the lack of an informant and the use of cognitive measures that were not selected to  
19 diagnose a neurocognitive disorder. Lessons learned in overcoming these obstacles will be of  
20 use for other longitudinal studies with similar limitations.
- 21 • The results of the blinded clinician assessments and the additional information collected from  
22 their identified informant will allow us to refine and improve the accuracy of our case  
23 ascertainment algorithm.
- 24 • If validated, the neurocognitive disorder case ascertainment algorithm developed for the CLSA is  
25 validated cannot be utilized by other population-based studies that differ in the data being  
26 collected on participants.  
27  
28  
29  
30  
31  
32  
33  
34  
35  
36  
37  
38  
39  
40  
41  
42  
43  
44  
45  
46  
47  
48  
49  
50  
51  
52  
53  
54  
55  
56  
57  
58  
59  
60



## INTRODUCTION

A key challenge in population-based studies in aging is to accurately identify individuals who have neurocognitive disorders (NCDs). A common approach is to utilize a two-stage evaluation based on participants' estimated risk of an NCD. High risk participants and a random sample of those at lower risk undergo a clinical assessment specifically designed to identify NCDs. This approach adds complexity and costs to the study while being burdensome for participants. Relying on self-reports is likely insensitive. The Canadian Study of Health and Aging (CSHA), which used a two-stage evaluation to ascertain the presence of dementia, found that nearly two thirds (64%) of participants identified with prevalent dementia in the study had never seen a physician for a memory problem.[1] This was particularly common among those with mild functional impairment. While administrative data can also be used to estimate the burden of physician diagnosed and documented NCDs, the proportion with undocumented mild and major NCD is significant. [2]

The estimated population-based burden of diagnosed and undiagnosed dementia in Canada is based on data collected two decades ago in the CSHA [1] that does not reflect updated criteria for the diagnosis of mild (mild cognitive impairment) and major (dementia) NCD as described in the fifth version of the Diagnostic and Statistical Manual of Mental Disorders [DSM]-5. [3] Moreover, the increased awareness of NCDs over time may have led to earlier and more comprehensive identification and diagnosis. [4] Previous analyses focused on major NCD, but mild NCD, which is viewed as a precursor to major NCD in many cases, has attracted increasing research interest. Approximately 50% of people with milder degrees of impaired cognition in later life progress to dementia within 5 years [5]. Mild NCD is believed by many to be more likely to respond to disease-modifying interventions, making those with this condition a prime target group for their use. [6–8]

Contemporary estimates of the burden of mild and major NCD including in individuals that have not received a diagnosis is important to the understanding of the epidemiology of these disorders, their risk, and protective factors, associated health outcomes, informing health and social care planning, and possibly leading to improved, proactive care of those living with or at risk for these conditions.

The accuracy of self-reported diagnoses for identifying chronic diseases is dependent on the condition, what is considered the gold standard diagnosis, as well as the population studied. [9–12] To improve the identification of individuals with chronic conditions in observational population-based studies, researchers often create disease ascertainment algorithms. These algorithms include multiple data items such as self-reported diagnosis, disease-specific questionnaires, performance measures, and medication data to classify participants into those with and without diseases. [13] Population-based studies have utilized algorithms to classify individuals as having an NCD or not. The Health and Retirement Study (HRS) found that their algorithms correctly identified 87-94% of participants on dementia status. [14] The Personality and Total Health Through Life Project found that their algorithm had very good performance for identifying major NCD (area under the curve (AUC) of 0.95) and good performance (AUC of 0.76) for identifying mild NCD. [15]

Although the application of algorithms to population-based data has the potential to be cost-effective and meet the need for a standardized and comprehensive identification of cases, because of variability in the studied populations and the data collected on them cohort-specific validation is required. [16] To validate an NCD algorithm, an assessment conducted by a clinician with training to diagnose NCDs is typically used as the gold standard. Ideally this assessment should include a participant interview, cognitive testing, physical examination, and an interview with an informant who knows the participant

well enough to answer questions about their cognition, function, and behaviour. Informant ratings have been found to reveal greater loss of everyday functional ability and cognitive competency than self-reports and are more strongly associated with objective measures of cognitive performance compared to how an individual rates their abilities. [17]

The Canadian Longitudinal Study on Aging (CLSA) is a large (51,338 participants aged 45–85 years at enrolment) national, longitudinal research platform that includes participants from all 10 Canadian provinces. [18] It is being used to address a wide variety of aging-related research challenges including NCD. Disease ascertainment algorithms are already being used in the CLSA for several conditions (e.g., type II diabetes mellitus, parkinsonism, chronic obstructive airway disease, osteoarthritis, coronary artery disease). [13]

To better understand the epidemiology and burden of diagnosed and undiagnosed mild and major NCD in CLSA participants (and by extrapolation the Canadian population), the CLSA Memory Study will be conducted to validate a disease ascertainment algorithm for NCD.

## METHODS AND ANALYSIS

### Study design and participant eligibility

The CLSA Memory Study will recruit participants from the CLSA. The CLSA is composed of two complementary cohorts that may be studied separately or together (**Figure 1**): (1) Tracking cohort of 21,241 participants randomly selected from within all 10 provinces who are interviewed by telephone, and, (2) Comprehensive cohort of 30,097 participants randomly selected from within 25–50 km of 11 data collection sites (DCSs) across the country who are first interviewed at home and then visit their local DCS for a more in-depth assessment that includes additional interviews, physical measures, and blood and urine samples. Participants are evaluated every 3 years and will be followed for 20 years (until 2033) unless they withdraw, are lost to follow-up, or die.

Consenting CLSA Memory Study participants will be asked to undergo a clinical assessment at a local DCS. For this reason, we will include participants from the Comprehensive cohort as well as Tracking Cohort participants who live within 25-50km of a DCS. CLSA participants unable to visit their local DCS, complete the clinical assessment for any reason (e.g., aphasia, hearing loss), or cannot identify an informant will be excluded from participation.

### Patient and public involvement

Participants and the public were not involved in our research design.

### Participant selection and recruitment

#### *Participant selection*

Prior to being contacted for the CLSA Memory Study, potential participants will be categorized on their presumed cognitive status according to DSM-5 criteria; 1) no NCD; 2) mild NCD; and, 3) major NCD. The categorization will be based on data collected during the CLSA baseline (from 2011-2015), follow-up 1 (conducted from 2015-2018), and follow-up 2 visits (conducted from 2018-2021). This preliminary categorization for participant selection is not the algorithm this project aims to validate.

Participants are **presumed to have a mild NCD** if they have a self-reported physician diagnosis of a memory problem, can both take medicine and manage money without help and have not lost their driver's license or have restrictions on their license other than wearing eyeglasses. Additionally, participants who demonstrated cognitive problems in scheduling or during CLSA DCS visits that were documented by staff will be presumed to have a mild NCD.

Participants are **presumed to have a major NCD** if they meet one or more of the following criteria;

1. Use of prescription medications for the treatment of a major NCD (specifically donepezil, galantamine, rivastigmine, memantine)
2. Self-reported physician diagnosis of dementia or Alzheimer's disease
3. Self-reported physician diagnosis of a memory problem **and** at least one of the following functional limitations;
  - Requires assistance taking medication
  - Requires assistance managing money
  - Among those who formerly drove, no longer having a driver's license or having a driver's license with restrictions other than eyeglasses

Participants that do not meet the criteria for presumed mild or major NCD will be **presumed not to have an NCD**.

Approximately equal numbers from each of the three categories will be recruited, though final recruitment goals will be based on NCD status as determined through the Memory Study (see Statistical Methods section). Participants presumed to have mild or major NCD will first be selected. For 1/3 of the participants presumed to have major NCD and for 2/3 of the participants presumed to have mild NCD, a person of the same age (using participants' age category as of June 1<sup>st</sup>, 2022 (54-63, 64-73, 74-83, 84+ years) and sex presumed to have no cognitive impairment will be chosen at random.

### ***Participant recruitment***

Participants will be recruited into the CLSA Memory Study during CLSA follow-up 3 (started August 2021). Recruitment for the CLSA Memory Study started on August 25<sup>th</sup>, 2022 and all data collection will be completed by March 31<sup>st</sup>, 2024. Tracking cohort participants and comprehensive cohort participants who have completed their CLSA follow-up 3 interview will be e-mailed/mailed the participant information package (**Supplementary Appendix 1**). Comprehensive cohort participants that have not yet completed their main CLSA follow-up 3 interview will be given the participant information package during their follow-up 3 in-home interview.

After the participant has received an information package, the local CLSA DCS will contact the participant by phone to determine their interest in the study. Interested participants will complete a short questionnaire to determine if they understand the purpose of the study and what participant entails. Potential participants who, as judged by the interviewer, do not understand the details of the study will be ineligible. There are no additional eligibility criteria for participants selected for this sub-study beyond the general requirements for participation in the CLSA. [18] Eligible participants will provide informed consent, identify and provide contact information for an informant and schedule their clinical assessment (**Supplementary Appendix 2**). If a participant is unable or unwilling to identify an informant, they will not be able to participate in the study.

### ***Informant recruitment***

Each participant will be asked to identify a family member or friend that knows them well enough to respond to questions about their cognitive health, ability to complete daily tasks, and behaviour. Potential informants will be provided with a copy of the family member or friend information package (**Supplementary Appendix 3**). The local DCS will contact the identified potential informant by phone prior to the participant's clinical assessment to discuss the study, obtain consent from the informant, and schedule a time to complete the informant interview via phone (**Supplementary Appendix 4**). If the identified informant does not wish to take part in the study, the participant will be contacted and asked to identify an alternative informant.

### ***Measurements***

The CLSA Memory Study includes a clinical assessment of the study participant and a phone interview with the informant which will take place between September 2022 and March 2024. This information will be used to provide a provisional study diagnosis of 1) no evidence of cognitive impairment; 2) mild NCD (MCI); or, 3) major NCD (dementia) based on DSM-5 criteria which will be used as the reference standard for which the algorithm will be compared.

### ***Clinical Assessment***

The clinical assessments will be conducted by a study clinician (medical specialist or senior trainee in geriatric medicine, geriatric psychiatry, neurology, or psychiatry; internist with training and experience in cognitive assessment; neuropsychologist) who will undergo local and/or virtual training in the performance of the standardized assessment and completion of all required forms. The clinical assessment (**Supplementary Appendix 5**) requires approximately one hour with the participant. It consists of a standardized history and physical examination designed to categorize the participant as having no evidence of an NCD, mild NCD, or major NCD. The study clinician will not have access to CLSA data on the participant other than name, age, sex, gender identity, education, employment status, and occupation and will be blinded to the participant's presumed cognitive status. The clinical assessment has not been designed to determine the likely underlying cause of the NCD, risk of progression, or specific care needs of the participant. The components of the assessment are as follows:

1. Participant interview
  - a. Sociodemographic information (age, sex, gender identity, education, occupation, employment status)
  - b. History of cognitive decline
  - c. Medical history including medical conditions, a review of medications focusing on those with cognitive effects, use of tobacco, cannabis and alcohol, and a family history of dementia
  - d. Basic activities of daily living measured using the Older Americans Resource and Services Program (OARS) scale [19]
  - e. Instrumental activities of daily living measured using the OARS scale [19] with additional questions regarding transportation (i.e., driving)
  - f. Behavioural symptoms including depression measured using the Patient Health Questionnaire-2 [20], anxiety, psychotic symptoms, and changes in personality.
2. Cognitive testing
  - a. The Montreal Cognitive Assessment (MoCA) [21] will be used as a general measure of cognition. The MoCA is a brief instrument that has been shown to be a valid screening test for mild (MCI) and major NCD (dementia) [22] with validated versions and

normative data for both English and Quebec-French [23] populations. The MoCA-BLIND version will be used for participants with visual impairments that would prevent them from completing the MoCA. [24] An optional section of the MoCA called the Memory Impairment Score (MIS) will be used to assess uncued and cued (category and multiple-choice options) recall of the memory items. The use of the MoCA total and MoCA-MIS scores with all the other information being collected on participants will be used to help identify participants with mild and major NCD. [25]

### 3. Physical examination

- a. Alertness
- b. Hearing
- c. Focal/lateralizing neurological findings
- d. Extrapyrarnidal signs
- e. Balance and gait assessment including transfers, gait, and the Romberg test

### ***Informant Interview***

The informant interview will be conducted by CLSA DCS staff using a standardized protocol. All CLSA DCSs have highly trained data collection teams. The informant interview (**Supplementary Appendix 6**) includes several overlapping items to those directly asked of participant. Interview questions will focus on the participant's cognitive, functional, and mood/behavioural history. The components of the interview are as follows:

1. Cognitive changes measured using the eight-item informant interview to differentiate aging and dementia (AD8<sup>®</sup> Dementia Screening Interview) [26]. The AD8<sup>®</sup> asks about changes in memory, orientation, judgement, and function that might indicate a dementing illness.
2. Medical history including medical conditions, use of tobacco, cannabis and alcohol, and a family history of dementia
3. Basic activities of daily living measured using the OARS scale [19]
4. Instrumental activities of daily living measured using the OARS scale [19] with additional questions regarding transportation
5. Presence of current mood and psychiatric symptoms using the Mild Behavioural Impairment Checklist (MBI-C). [27]The MBI-C was designed to measure neuropsychiatric symptoms that precede or coincide with the diagnosis of mild cognitive impairment. The instrument measures the domains of 1) decreased motivation; 2) emotional dysregulation; 3) loss of impulse control; 4) social inappropriateness; and, 5) abnormal perception or thought content.

### **Participant categorization based on clinical assessment and informant interview**

#### ***Study clinician***

Based on the clinical assessment and the informant interview, the study clinician will make a provisional clinical determination of: 1) no evidence of cognitive impairment; 2) mild NCD (MCI); or, 3) major NCD (dementia) based on DSM-5 criteria. [3] All participants that complete the medical assessment will have a provisional clinical determination.

1  
2  
3 Study physicians will not provide participants with their provisional diagnosis, as to make a clinical  
4 diagnosis of mild or major NCD with confidence would require a more in-depth evaluation including  
5 review of prior health records, laboratory and/or imaging investigations as well as possible follow-up  
6 visits that our study clinicians are unable to provide. The study clinician will verbally tell the participant if  
7 there is a potential concern regarding their memory (the term memory will be used to describe any  
8 cognitive concern when communicating with the participant) or if they do not have any concerns based  
9 on the assessment and informant interview just conducted. The study clinician will tailor the  
10 conversation based on the participant's level of understanding and their own degree of concern. Each  
11 participant will then be provided with a letter indicating if the clinician identified a potential problem  
12 with the participant's memory (**Supplementary Appendix 7**) or no evidence of a potential problem with  
13 the participant's memory (**Supplementary Appendix 8**), as well as the participant's total score on the  
14 MoCA and details about the CLSA Memory Study. Participants identified by the clinician as having  
15 potential concerns about their memory will be encouraged to speak with their family physician and  
16 share the information provided verbally and in writing. If the participant does not have a family  
17 physician, the study clinician will provide the participant with local resources that the participant may  
18 use for follow-up care.  
19  
20  
21

### 22 **Central Review Panel**

23 A Central Review Panel including medical specialists (e.g., geriatric medicine, geriatric psychiatry,  
24 neurology, or psychiatry with training and experience in cognitive assessment) and neuropsychologists  
25 will review the clinical assessment, informant interview, and available CLSA data such as performance on  
26 the neurocognitive battery conducted at baseline through to the follow-up 2 CLSA assessment (which  
27 the examining physician will not have seen). Based on the review of these data, the Panel will make a  
28 final study categorization. This will be compared to the one made by the study clinician, and, if different,  
29 an explanation for reaching a differing determination will be documented and provided to the  
30 examining clinician. The Central Review Panel will help ensure that the study is implemented in a  
31 standardized manner across all sites by the participating clinicians. Any concerns will be brought to the  
32 attention of the involved clinician and the CLSA Memory Study investigators.  
33  
34  
35

### 36 **Pilot study and adaptation of recruitment criteria**

37 Prior to the full implementation of the CLSA Memory Study, pilot testing will be conducted on a sample  
38 of 10 participants at two DCS sites (Hamilton and Calgary) to 1) identify any issues needing correction  
39 and 2) develop implementation advice for all DCS sites. These participants will be included in the final  
40 sample with their data retained as study data.  
41

42 CLSA Memory Study investigators and staff will monitor the number of recruited participants by  
43 presumed NCD status, study clinician NCD determinations, and Central Review Panel categorizations at a  
44 group level. This monitoring will allow the detection of unbalanced recruitment and the opportunity to  
45 adapt the recruitment strategy during the study to ensure we end up with approximately equal number  
46 of participants in each NCD diagnostic category based on the Central Review Panel categorizations. For  
47 example, if the number of participants determined by the study clinician and/or Central Review Panel to  
48 have major NCD is lower than expected, we will start to oversample from the group of participants  
49 presumed to have a major NCD to compensate.  
50  
51  
52  
53  
54  
55  
56  
57  
58  
59  
60

## CLSA NCD ascertainment algorithm

### ***Development of the CLSA NCD ascertainment algorithm***

The CLSA NCD ascertainment algorithm was informed by a systematic review of methods used to identify cases of mild and major NCD in population-based studies ([https://www.crd.york.ac.uk/prospero/display\\_record.php?RecordID=78874](https://www.crd.york.ac.uk/prospero/display_record.php?RecordID=78874)). Identified potential items for inclusion were categorized based on DSM-5 criteria and then mapped onto available CLSA data (**Supplementary Appendix 9**). Conditional use (e.g., only include functional data provided by participants who achieve a certain cognitive threshold on the MoCA) and alternative weighting of select items that might improve on the accuracy of the algorithm will be explored in the study.

### ***Participant categorization based on CLSA ascertainment algorithm***

The initial validation of the CLSA ascertainment algorithm will include CLSA data from baseline, follow-up 1, and follow-up 2 assessments. The follow-up 2 interview data were collected three or more years before the Memory Study was initiated and may not accurately reflect the current cognitive status for all participants (e.g., for those with new onset neurocognitive disorders). Therefore, final validation of the algorithm will occur when the follow-up 3 assessment data, which were collected at the time of the CLSA Memory Study, are available to the Central Review Panel in 2024. The algorithm will only include previously collected CLSA data and will not include information that was collected as part of the CLSA Memory Study (e.g., informant interview, clinical assessment).

Broadly, the ascertainment algorithm will determine NCD status as; 1) no evidence of cognitive impairment; 2) mild NCD (MCI); or, 3) major NCD (dementia) hierarchically using the criteria identified in **Supplementary Appendix 9**; first identifying participants meeting the DSM-5 criteria for major NCD, then of the remaining participants, identifying those that meet the DSM-5 criteria for mild NCD. The algorithm will then classify participants as either having no evidence of cognitive impairment, or indeterminant for participants with missing data that prevents the algorithm from making a final determination. A version of the algorithm using an imputed dataset which considers other waves of data collection and missing data patterns will also be developed. The imputed algorithm will not have an indeterminant category.

### **Statistical analyses and sample size determination**

Kappa using Cicchetti-Allison weights and the percent of agreement between the reference standard and the CLSA NCD algorithm will be calculated to assess the reliability of the CLSA algorithm. Sensitivity, specificity, and C statistics for the CLSA NCD algorithm for each outcome category (major NCD, mild NCD, or no evidence of cognitive impairment) will be estimated using logistic regression. [28] Analyses will be completed overall and stratified by sex and age-group (age 45-65 years old and 65+) using SAS. We will conduct the analyses using the version of the algorithm with the indeterminate category for participants with missing data as well as using the version of the algorithm with imputed data.

We have calculated the minimum sample size required based on different combinations of Kappa values and precision (distance between the lower and upper 95% confidence limits) (**Table 1**) using the 'kappaSize' Package in R with 3 outcome categories. This package assumed unweighted kappa to provide a conservative sample size estimate. Our final sample size will range between approximately 200 participants assuming an expected Kappa of 0.7 and precision of 0.2, and 600 participants assuming an expected Kappa of 0.7 and a precision of 0.1. Our aspiration is to recruit as close to 600 participants

as possible, but this will be dependent on sufficient funding. We currently have funding confirmed for 320.

**Table 1 – Minimum sample size for 95% confidence interval width (0.05, 0.1, 0.15, and 0.2) by Kappa**

| Kappa | Precision (the distance between the lower and upper 95% confidence limits) | Minimum required total sample size |
|-------|----------------------------------------------------------------------------|------------------------------------|
| 0.7   | 0.05                                                                       | 2348                               |
|       | 0.10                                                                       | 619                                |
|       | 0.15                                                                       | 289                                |
|       | 0.20                                                                       | 170                                |
| 0.8   | 0.05                                                                       | 1764                               |
|       | 0.10                                                                       | 481                                |
|       | 0.15                                                                       | 231                                |
|       | 0.20                                                                       | 139                                |

## ETHICS AND DISSEMINATION

Ethics approval for this project was provided by the Research Ethics Board responsible for each participating site (**Supplementary Appendix 10**).

Our knowledge translation plan includes sharing the results of the project with researchers and health professionals through journal publications and conference presentations. The CLSA will host a webinar on the Memory Study that will be open to researchers, health professionals, public health workers, as well as participants with an interest in NCD research. We will work with other partners to present our results to key groups. The CLSA will develop and disseminate a report that describes the results of the project and implications for health system stakeholders likely to use the results (e.g., health professionals, administrators, policymakers). The report and presentations will be tailored to specific stakeholder groups including those responsible for provincial and national dementia strategies (e.g., Ministerial Advisory Board on Dementia), health professional organizations (e.g., Canadian Geriatrics Society), and health charities (e.g., Alzheimer's Society of Canada). The report will also be available on the CLSA website. The CLSA website and social media platforms will be used to disseminate a summary of the project to participants. It is anticipated that the targets of tailored knowledge translation activities will use the results in various ways including: additional research on risk and protective factors for NCDs; development and implementation of best practices for early intervention and treatment for people with mild and major NCD; and, improving public health surveillance systems that develop population estimates for dementia in Canada that can be used to inform current and future government investment in prevention and care.

## DISCUSSION

There are some limitations with the use of CLSA data for developing an NCD ascertainment algorithm. First, CLSA interview data do not include an informant interview on most participants. In clinical settings, informant reports are an important component of the diagnosis of NCDs, as individuals with an NCD may be unaware of their own functional status and behavioural changes. [29] Although the CLSA asks participants over the age of 70 years to identify a proxy, proxy interviews have only been conducted on a small number of participants and under specific conditions. Informant data therefore cannot be used



1  
2  
3 to inform the algorithm. Another limitation is that the CLSA neurocognitive battery was not developed  
4 to diagnose NCDs. [30] Rather, the battery items were selected to be applicable to a wide age range  
5 without ceiling or floor effects in order to capture decline over time. The neurocognitive battery items  
6 reflect the domains of executive function and memory, but not complex attention, language,  
7 perceptual-motor, or social cognition.  
8

9  
10 There are also several strengths of the CLSA dataset for developing an NCD ascertainment algorithm.  
11 The breadth of routinely collected CLSA data (e.g., balance and gait performance measures, trajectory of  
12 changes in cognitive test performance) and the high percentage of participants (~88%) that have  
13 provided permission to the CLSA data to be linked to health care administrative databases provides an  
14 opportunity to explore the creation of an expanded and superior NCD ascertainment algorithm. Having  
15 a relatively large (up to 600) group of participants who have gone through a gold standard assessment  
16 for NCDs will make this effort possible.  
17

## 18 CONCLUSION

19  
20  
21 If the results of the CLSA Memory Study suggest that the proposed NCD ascertainment algorithm is a  
22 valid method of identifying NCD cases, it will be applied to all CLSA participants. This will enhance the  
23 CLSA dataset for NCD research and provide important insights regarding the risk and protective factors  
24 of NCD and associated health outcomes. Linkage to healthcare administrative databases will allow the  
25 CLSA to estimate the burden of mild and major NCD in Canada. Together, these sources of data will help  
26 inform health and social care planning for individuals with NCD.  
27

28  
29 **Authorship:** The following are members of the CLSA Memory Study Working Group: Andrew Costa,  
30 Benoit Cossette, Lauren E. Griffith, David B. Hogan, Aaron Jones, Susan Kirkland, Teresa Liu-Ambrose,  
31 Jinhui Ma, Alexandra J. Mayhew, Jacqueline McMillan, Verena Menec, Gerry Mugford, Megan E.  
32 O'Connell, Theone Paterson, Christopher Patterson, Parminder Raina, Eric E. Smith, Vanessa Taler, Mary  
33 Thompson, Andrew Wister, Christina Wolfson, & Changbao Wu.  
34

35 **Author Contributions:** LEG, PR, AC, and DH led the conceptualization of the study methodology. AJM  
36 made contributions to the design of the study methods and wrote the first draft of the manuscript. CW,  
37 AJ, SK, MO, VT, EES, TL-A, JM, MT, CW, HC made contributions to the design of the study methods and  
38 supported the manuscript. All authors critically revised the manuscript, approved the final version, and  
39 agree to be accountable for all aspects of the work in ensuring that questions related to the accuracy or  
40 integrity of any part of the work are appropriately investigated and resolved  
41

42  
43 **Acknowledgements:** This research was made possible using the data/biospecimens collected by the  
44 Canadian Longitudinal Study on Aging (CLSA). Funding for the Canadian Longitudinal Study on Aging  
45 (CLSA) is provided by the Government of Canada through the Canadian Institutes of Health Research  
46 (CIHR) under grant reference: LSA 9447 and the Canada Foundation for Innovation, as well as the  
47 following provinces, Newfoundland, Nova Scotia, Quebec, Ontario, Manitoba, Alberta, and British  
48 Columbia. The CLSA provided data to the authors to conduct this study through an internal methods  
49 project application. The CLSA is led by Drs. Parminder Raina, Christina Wolfson, and Susan Kirkland. The  
50 opinions expressed in this manuscript are the authors' own and do not reflect the views of the CLSA.  
51 This research was also made possible by CIHR Team Grant (New Directions in Dementia Research: Big  
52 Data) funding provided to the Canadian Consortium on Neurodegeneration in Aging (CCNA) for the  
53 *Broad and Deep Analyses in Neurodegeneration (BRAIN)* project. The Scientific Director of the CCNA is  
54 Dr. Howard Chertkow. The opinions expressed in this manuscript are the authors' own and do not  
55 reflect the views of the CCNA.  
56  
57

1  
2  
3 **Funding statement:** Funding for this project is provided by the Public Health Agency of Canada under  
4 project number 2021-HQ-000076 and the CIHR (funding reference number BDO 148341).  
5

6 **Competing interests:** ES has been paid consulting fees by Eli Lilly and Alnylam. No other authors have  
7 conflicts of interest to report.  
8  
9  
10  
11  
12  
13  
14  
15  
16  
17  
18  
19  
20  
21  
22  
23  
24  
25  
26  
27  
28  
29  
30  
31  
32  
33  
34  
35  
36  
37  
38  
39  
40  
41  
42  
43  
44  
45  
46  
47  
48  
49  
50  
51  
52  
53  
54  
55  
56  
57  
58  
59  
60

For peer review only

## REFERENCES

- 1 Sternberg SA, Wolfson C, Baumgarten M. Undetected dementia in community-dwelling older people: The Canadian study of health and aging. *J Am Geriatr Soc* 2000;**48**:1430–4. doi:10.1111/j.1532-5415.2000.tb02633.x
- 2 Lang L, Clifford A, Wei L, *et al*. Prevalence and determinants of undetected dementia in the community: A systematic literature review and a meta-analysis. *BMJ Open* 2017;**7**:1–8. doi:10.1136/bmjopen-2016-011146
- 3 American Psychiatric Association. *Diagnostic and Statistical Manual of Mental Disorders, Fifth Edition*. American Psychiatric Association Publishing 2013.
- 4 Tang W, Kannaley K, Friedman DB, *et al*. Concern about developing Alzheimer’s disease or dementia and intention to be screened: An analysis of national survey data. *Arch Gerontol Geriatr* 2017;**71**:43–9. doi:10.1016/j.archger.2017.02.013
- 5 Tuokko H, Frerichs RJ. Cognitive impairment with no dementia (CIND): Longitudinal studies, the findings, and the issues. *Clinical Neuropsychologist* 2000;**14**:504–25. doi:10.1076/clin.14.4.504.7200
- 6 U.S. Department of Health and Human Services Food and Drug Administration. Early Alzheimer’s Disease: Developing Drugs for Treatment -Guidance for Industry. 2018. <https://www.fda.gov/Drugs/GuidanceComplianceRegulatoryInformation/Guidances/default.htm>
- 7 van Dyck CH, Swanson CJ, Aisen P, *et al*. Lecanemab in Early Alzheimer’s Disease. *N Engl J Med* Published Online First: 29 November 2022. doi:10.1056/NEJMoa2212948
- 8 Getsios D, Blume S, Ishak KJ, *et al*. An economic evaluation of early assessment for Alzheimer’s disease in the United Kingdom. *Alzheimer’s and Dementia* 2012;**8**:22–30. doi:10.1016/j.jalz.2010.07.001
- 9 Stoye G, Zaranko B. IFS Working Paper W20/13 How accurate are self-reported diagnoses? Comparing self-reported health events in the English Longitudinal Study of Ageing with administrative hospital records How accurate are self-reported diagnoses? Comparing self-reported health events in the English Longitudinal Study of Ageing with administrative hospital records. 2020.
- 10 Smith B, Chu LK, Smith TC, *et al*. Challenges of self-reported medical conditions and electronic medical records among members of a large military cohort. *BMC Med Res Methodol* 2008;**8**:1–10. doi:10.1186/1471-2288-8-37
- 11 Okura Y, Urban LH, Mahoney DW, *et al*. Agreement between self-report questionnaires and medical record data was substantial for diabetes , hypertension , myocardial infarction and stroke but not for heart failure. 2004;**57**:1096–103. doi:10.1016/j.jclinepi.2004.04.005

- 1  
2  
3 12 Payette Y, de Moura C, Boileau C, *et al.* Is there an agreement between self-reported medical  
4 diagnosis in the CARTaGENE cohort and the Québec administrative health databases? *Int J Popul*  
5 *Data Sci* 2019;**5**.  
6  
7  
8 13 Oremus M, Postuma R, Griffith L, *et al.* Validating chronic disease ascertainment algorithms for  
9 use in the Canadian Longitudinal Study on Aging. *Canadian Journal on Aging* 2013;**32**:232–9.  
10 doi:10.1017/S0714980813000275  
11  
12 14 Gianattasio KZ, Wu Q, Glymour MM, *et al.* Comparison of Methods for Algorithmic Classification  
13 of Dementia Status in the Health and Retirement Study. *Epidemiology* 2019;**30**:291–302.  
14 doi:10.1097/EDE.0000000000000945  
15  
16 15 Eramudugolla R, Mortby ME, Sachdev P, *et al.* Evaluation of a research diagnostic algorithm for  
17 DSM-5 neurocognitive disorders in a population-based cohort of older adults. *Alzheimers Res*  
18 *Ther* 2017;**9**:1–12. doi:10.1186/s13195-017-0246-x  
19  
20 16 Wilkinson T, Ly A, Schnier C, *et al.* Identifying dementia cases with routinely collected health  
21 data: A systematic review. *Alzheimer's and Dementia* 2018;**14**:1038–51.  
22 doi:10.1016/j.jalz.2018.02.016  
23  
24 17 Rueda A, Lau K, Saito N, *et al.* Self-rated and informant-rated everyday function in comparison to  
25 objective markers of Alzheimer's disease. *Alzheimers Dement* 2016;**11**:1080–9.  
26 doi:10.1016/j.jalz.2014.09.002.Self-rated  
27  
28 18 Raina PS, Wolfson C, Kirkland SA, *et al.* Cohort profile: The Canadian Longitudinal Study on Aging  
29 (CLSA). *Canadian Journal on Aging* 2009;**28**:221–9. doi:10.1017/S0714980809990055  
30  
31 19 Fillenbaum G, Smyer M. The development, validity, and reliability of the OARS Multidimensional  
32 Functional Assessment Questionnaire. *J Gerontol* 1981;**36**:428–34.  
33  
34 20 Kroenke K, Spitzer RL, Williams JBW. The Patient Health Questionnaire-2 Validity of a Two-Item  
35 Depression Screener. *Med Care* 2003;**41**:1284–92.  
36  
37 21 Nasreddine ZS, Phillips NA, Bédirian V, *et al.* The Montreal Cognitive Assessment, MoCA: A brief  
38 screening tool for mild cognitive impairment. *J Am Geriatr Soc* 2005;**53**:695–9.  
39 doi:10.1111/j.1532-5415.2005.53221.x  
40  
41 22 Tsoi KKF, Chan JYC, Hirai HW, *et al.* Cognitive tests to detect dementia a systematic review and  
42 meta-analysis. *JAMA Intern Med* 2015;**175**:1450–8. doi:10.1001/jamainternmed.2015.2152  
43  
44 23 Larouche E, Tremblay MP, Potvin O, *et al.* Normative Data for the Montreal Cognitive Assessment  
45 in Middle-Aged and Elderly Quebec-French People. *Archives of Clinical Neuropsychology*  
46 2016;**31**:819–26. doi:10.1093/arclin/acw076  
47  
48  
49  
50  
51  
52  
53  
54  
55  
56  
57  
58  
59  
60

- 1  
2  
3 24 Wittich W, Phillips N, Nasreddine ZS, *et al.* Sensitivity and specificity of the Montreal cognitive  
4 assessment modified for individuals who are visually impaired. *J Vis Impair Blind* 2010;**104**:360–8.  
5 doi:10.1177/0145482x1010400606  
6  
7  
8 25 Julayanont P, Brousseau M, Chertkow H, *et al.* Montreal Cognitive Assessment Memory Index  
9 Score (MoCA-MIS) as a predictor of conversion from mild cognitive impairment to Alzheimer’s  
10 disease. *J Am Geriatr Soc* 2014;**62**:679–84. doi:10.1111/jgs.12742  
11  
12 26 Galvin JE, Roe CM, Powlishta KK, *et al.* The AD8: A brief informant interview to detect dementia.  
13 *Neurology* 2005;**65**:559–64. doi:10.1212/01.wnl.0000172958.95282.2a  
14  
15  
16 27 Ismail Z, Aguera-Ortiz L, Brodaty H, *et al.* The mild behavioral impairment checklist (MBI-C): A  
17 rating scale for neuropsychiatric symptoms in pre-dementia populations. *Journal of Alzheimer’s*  
18 *Disease* 2017;**56**:929–38. doi:10.3233/JAD-160979.The  
19  
20  
21 28 Cook R, Farewell V. Conditional inference for subject specific and marginal agreement. Two  
22 families of agreement measures. *Canadian Journal of Statistics* 1995;**23**:333–44.  
23  
24 29 Schinka JA. Use of informants to identify mild cognitive impairment in older adults. *Curr*  
25 *Psychiatry Rep* 2010;**12**:4–12. doi:10.1007/s11920-009-0079-9  
26  
27  
28 30 Tuokko H, Griffith LE, Simard M, *et al.* Cognitive measures in the Canadian Longitudinal Study on  
29 Aging. *Clin Neuropsychol* 2017;**40**:1–18. doi:10.1080/13854046.2016.1254279  
30  
31  
32  
33  
34  
35  
36  
37  
38  
39  
40  
41  
42  
43  
44  
45  
46  
47  
48  
49  
50  
51  
52  
53  
54  
55  
56  
57  
58  
59  
60

1  
2  
3 **Figure 1. CLSA Study Design:** The CLSA Memory Study will recruit Comprehensive Cohort and Tracking  
4 Cohort participants who are currently undergoing their follow-up three assessment (started August  
5 2021) for the CLSA.  
6  
7  
8  
9  
10  
11  
12  
13  
14  
15  
16  
17  
18  
19  
20  
21  
22  
23  
24  
25  
26  
27  
28  
29  
30  
31  
32  
33  
34  
35  
36  
37  
38  
39  
40  
41  
42  
43  
44  
45  
46  
47  
48  
49  
50  
51  
52  
53  
54  
55  
56  
57  
58  
59  
60

For peer review only

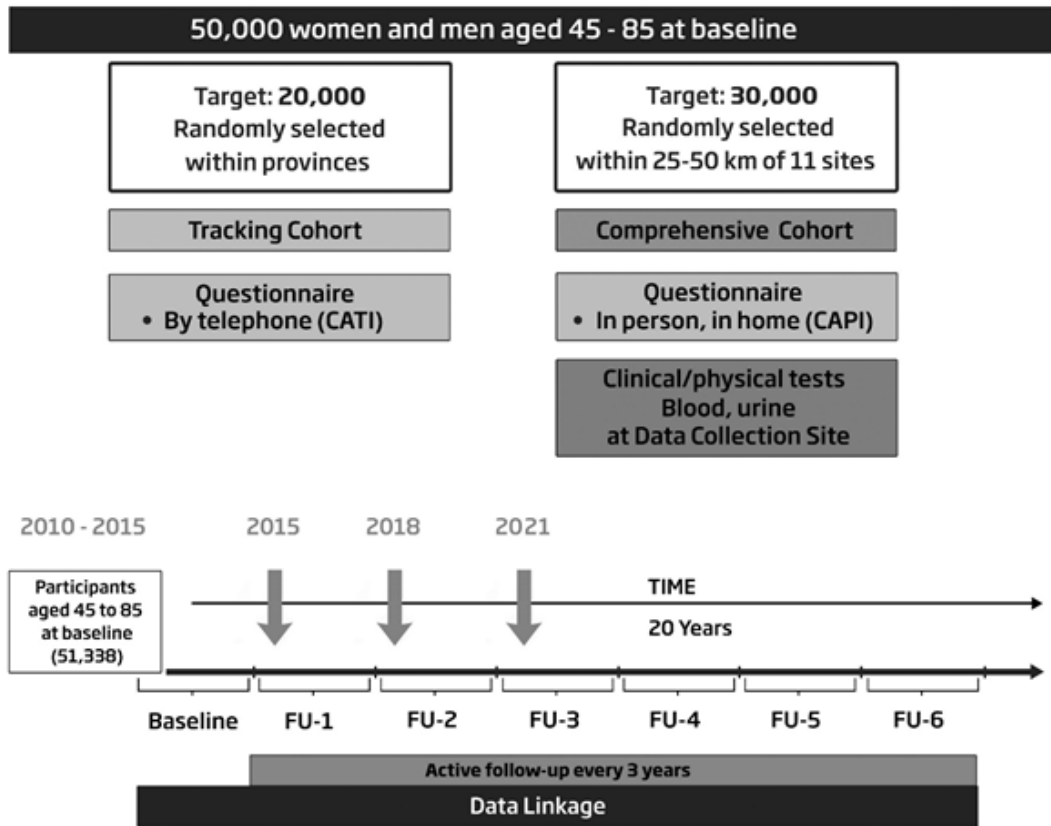

view only

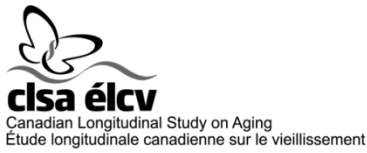

1  
2  
3  
4  
5 **Supplementary Appendix 1 – Participant Information Package for Tracking and**  
6 **Comprehensive Cohort Participants**  
7  
8  
9

10  
11  
12  
13  
14  
15  
16 **Participant Information Package Cover Letter for Tracking Cohort Participants..... 2**  
17 **Participant Information Package Cover Letter for Comprehensive Cohort Participants ..... 4**  
18 **Participant Study Information Package ..... 6**  
19  
20  
21  
22  
23  
24  
25  
26  
27  
28  
29  
30  
31  
32  
33  
34  
35  
36  
37  
38  
39  
40  
41  
42  
43  
44  
45  
46  
47  
48  
49  
50  
51  
52  
53  
54  
55  
56  
57  
58  
59  
60

peer review only



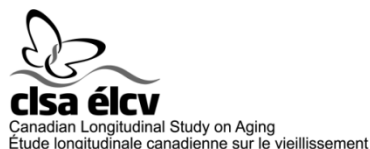

## Participant Information Package Cover Letter for Tracking Cohort Participants

Dear [Participant],

As a longstanding participant in the Canadian Longitudinal Study on Aging (CLSA), we are inviting you to participate in the CLSA Memory Study. Participants in the CLSA Memory Study will be asked to:

1. Undergo a medical assessment by a study physician at the CLSA Data Collection Site. The CLSA Data Collection Site is within 25 to 50km of your home. You will be given \$30 in cash or as a gift card in lieu of expenses such as parking or other travel related expenses. The assessment will include questions about your medical history and a brief cognitive test which includes answering questions and drawing on paper. The doctor will also complete a neurocognitive examination, which involves assessing your ability to see, observing you move, and listening to you speak.
2. Identify a family member or friend who knows you well to complete an interview by phone regarding your cognitive health, ability to complete daily tasks, and behaviour.

The CLSA Memory Study is being funded by the Public Health Agency of Canada (PHAC). The CLSA Memory Study is being led by Dr. Lauren Griffith, Dr. Andrew Costa, and Dr. Parminder Raina, all from McMaster University. Other researchers from universities across Canada are also involved.

[Attached to this email are/This package contains] two documents that will provide you with information to help you make an informed choice about if you would like to take part in this study.

1. **Participant Study Information Package** – This package includes information about the study for you to review.
2. **Family Member or Friend Study Information Package** – This package includes information for the family member or friend you ask to complete the telephone regarding your cognitive health, ability to complete daily tasks, and behaviour. If you see your family member or friend in person, you may choose to share this information package with them. Otherwise, we can arrange to send a physical or electronic copy to them.

Please read the **Participant Study Information Package** carefully. We will call you in the next few weeks and you will have an opportunity to ask any questions you may have. You may also find it helpful to discuss this study with your friends and family.

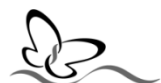

**clsa élcv**

Canadian Longitudinal Study on Aging  
Étude longitudinale canadienne sur le vieillissement

If you wish to contact us directly, please feel free to:

- Email at **info@clsa-elcv.ca**
- Call our toll-free line at **1-866-999-8303**

Thank you,

For peer review only

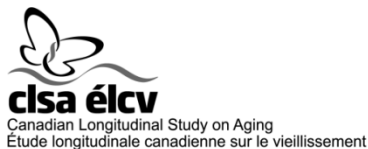

## Participant Information Package Cover Letter for Comprehensive Cohort Participants

Dear [Participant],

As a longstanding participant in the Canadian Longitudinal Study on Aging (CLSA), we are inviting you to participate in the CLSA Memory Study. Participants in this study will be asked to:

1. Undergo a medical assessment by a study physician at the CLSA Data Collection Site. The assessment will include questions about your medical history and a brief cognitive test which includes answering questions and drawing on paper. The doctor will also complete a neurocognitive examination, which involves assessing your ability to see, observing you move, and listening to you speak.
2. Identify a family member or friend who knows you well to complete an interview by phone regarding your cognitive health, ability to complete daily tasks, and behaviour.

The CLSA Memory Study is being funded by the Public Health Agency of Canada (PHAC). The CLSA Memory Study is being led by Dr. Lauren Griffith, Dr. Andrew Costa, and Dr. Parminder Raina, all from McMaster University. Other researchers from universities across Canada are also involved.

[Attached to this email are/This package contains] two documents that will provide you with information to help you make an informed choice about if you would like to take part in this study.

1. **Participant Study Information Package** – This package includes information about the study for you to review.
2. **Family Member or Friend Study Information Package** – This package includes information for the family member or friend you ask to complete the telephone regarding your cognitive health, ability to complete daily tasks, and behaviour. If you see your family member or friend in person, you may choose to share this information package with them. Otherwise, we can arrange to send a physical or electronic copy to them.



5 Please read the **Participant Study Information Package** carefully. We will call you in the  
6 next few weeks and you will have an opportunity to ask any questions you may have. You  
7 may also find it helpful to discuss this study with your friends and family.  
8

9 If you wish to contact us directly, please feel free to:

- 11 • Email at **info@clsa-elcv.ca**
- 12
- 13 • Call our toll-free line at **1-866-999-8303**
- 14
- 15

16  
17 Thank you,  
18  
19  
20  
21  
22  
23  
24  
25  
26  
27  
28  
29  
30  
31  
32  
33  
34  
35  
36  
37  
38  
39  
40  
41  
42  
43  
44  
45  
46  
47  
48  
49  
50  
51  
52  
53  
54  
55  
56  
57  
58  
59  
60

For peer review only

## PARTICIPANT STUDY INFORMATION PACKAGE

**Study Title:** Canadian Longitudinal Study on Aging (CLSA) Memory Study

### Principal Investigators:

Dr. Lauren Griffith, Department of Health Research Methods, Evidence, and Impact, McMaster University

Dr. Andrew Costa, Department of Health Research Methods, Evidence, and Impact, McMaster University

Dr. Parminder Raina, Department of Health Research Methods, Evidence, and Impact, McMaster University

### Co-Investigators:

#### Newfoundland and Labrador

Dr. Gerry Mugford – Memorial University

#### Nova Scotia

Dr. Susan Kirkland – Dalhousie University

#### Quebec

Dr. Benoît Cossette – Université de Sherbrooke

Dr. Christina Wolfson – McGill University

#### Ontario

Dr. Cynthia Balion – McMaster University

Dr. Aaron Jones – McMaster University

Dr. Alexandra Mayhew – McMaster University

Dr. Vanessa Taler – University of Ottawa

Dr. Mary Thompson – University of Waterloo

Dr. Changbao Wu – University of Waterloo

#### Manitoba

Dr. Verena Menec – University of Manitoba

#### Saskatchewan

Dr. Megan O'Connell – University of Saskatchewan

#### Alberta

Dr. David Hogan – University of Calgary

Dr. Eric Smith – University of Calgary

British Columbia

Dr. Scott Hofer – University of Victoria

Dr. Teresa Liu-Ambrose – University of British Columbia

Dr. Andrew Wister – Simon Fraser University

### Supported by:

The Public Health Agency of Canada

**Conflicts of interest:** There are no conflicts of interest to declare related to this study.



## What is the purpose of the CLSA Memory Study?

- The purpose of this research study is to determine whether information that is collected through CLSA interviews can be used to correctly identify individuals who have memory problems and individuals without memory problems.

## How many people will take part in the CLSA Memory Study?

- We will recruit approximately 600 participants from the 11 CLSA Data Collection Sites in Canada (Surrey, British Columbia; Victoria, British Columbia; Vancouver, British Columbia; Calgary, Alberta; Winnipeg, Manitoba; Hamilton, Ontario; Ottawa, Ontario; Montréal, Quebec; Sherbrooke, Quebec; Halifax, Nova Scotia; and St. John's, Newfoundland).
- This study will take approximately two years to complete and the results should be known in approximately three years.

## What will I be asked to do if I volunteer to be part of the CLSA Memory Study?

- **A staff member from your local Data Collection Site will contact you to discuss the CLSA Memory Study in the next couple of weeks.** You will have an opportunity to ask any questions that you may have. If you are interested in participating in the CLSA Memory Study, the CLSA staff member will ask you a few questions to assess if you are eligible to participate and to determine that you understand the study before asking for your consent to participate.
- **Book an appointment for your medical assessment with a study physician at your local Data Collection Site.** This appointment will take place at a time convenient for you and the assessment will last one hour. If you have not yet completed your main CLSA Follow-up 3 interview, your medical assessment appointment will be scheduled on a separate date.

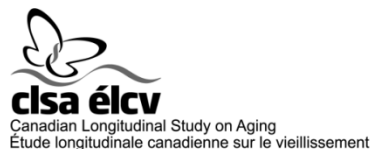

- 1  
2  
3  
4  
5  
6 • **Identify a family member or friend who knows you well and can respond**  
7 **to questions about your cognitive health, ability to complete daily tasks,**  
8 **and behaviour.**  
9
  - 10 ○ We will ask for the name and phone number of your family member or  
11 friend when we call to book your medical assessment. If possible, we ask  
12 that you discuss the study with this person and to let them know to expect a  
13 phone call from the CLSA.
  - 14
  - 15
  - 16
  - 17 ○ Your family member or friend will be asked to complete a 20-minute  
18 interview with a CLSA staff member over the phone before your medical  
19 assessment. You do not need to be present for the interview with your  
20 family member or friend. Your family member or friend may be contacted  
21 after your medical assessment to clarify the information provided.
  - 22
  - 23
  - 24
  - 25
  - 26 ○ The CLSA will not share any personal information about you with your  
27 family member or friend.
  - 28
  - 29
- 30 • **The day before your appointment, the CLSA may contact you to review**  
31 **the screening questions for COVID symptoms and exposure, depending**  
32 **on the requirements of their institution.**  
33  
34
- 35 • **You will visit your local Data Collection Site for your medical**  
36 **assessment with the study physician.** The day of your appointment, the  
37 Data Collection Site may review the screening questions for COVID  
38 symptoms and exposure, according to their own protocols. The study  
39 physician will:  
40  
41
  - 42 ○ Conduct an assessment which will include questions about your medical  
43 history, your habits, and your ability to do everyday activities.
  - 44
  - 45 ○ Ask you to complete a brief cognitive test which includes answering  
46 questions and drawing on paper.
  - 47
  - 48
  - 49 ○ Assess your neurological function by assessing your ability to see,  
50 observing you move, and listening to you speak.
  - 51
  - 52
  - 53
  - 54
  - 55
  - 56
  - 57
  - 58



- Ask what medications you are taking. We ask that you bring your physical medications or a list of your medications to your medical assessment for the study physician to review.

### **Will I receive a medical diagnosis from the CLSA Memory Study?**

- The study physician will determine if there is a potential concern about your memory or if your memory seems normal. This is not considered a medical diagnosis.
- If the study physician identifies a potential concern about your memory, they will give you a letter about the study and some of your individual results that you may want to share with your family doctor.
- If you do not have a family doctor, the study physician will provide you with some suggested resources regarding the potential concern about your memory.

### **Will I get any personal benefit from taking part in the CLSA Memory Study?**

- You will not get any direct personal benefit from taking part in the CLSA Memory Study.
- Your participation in the CLSA Memory Study will contribute to potentially developing new ways to identify individuals with memory problems, even if they have not been diagnosed by a physician.

### **Are there any risks from taking part in the CLSA Memory Study?**

- There are no direct medical risks associated with participation in this study.
- Some participants may feel tired or frustrated during the medical assessment with the study physician. If you need a break during the medical assessment, please ask the study physician.
- Some participants may feel worried about if the study physician will identify a potential concern about their memory. Participants identified as having a





1  
2  
3  
4  
5  
6 potential concern about their memory will have an opportunity to speak with  
7 the study physician to discuss their concerns.  
8  
9

- 10  
11 • It is important to understand that since participation in the CLSA Memory  
12 Study will require travel outside your home and potentially increased  
13 exposure to others, it may increase your risk of exposure to COVID-19. The  
14 Data Collection Sites follow established protocols for working safety during  
15 the pandemic and include maintaining physical distance of 2 metres  
16 whenever possible and use of appropriate personal protective equipment.  
17 The information related to the risks of COVID-19 changes every day, and the  
18 risk-reduction strategies that are most effective are also adjusted to meet  
19 these changes.  
20  
21  
22  
23  
24

### 25 **Will there be a cost to me to take part in this study?**

- 26  
27 • Your participation in this research study will not involve any costs to you  
28 except the time it takes you to complete the medical assessment. You will be  
29 given \$30 to cover any expenses incurred when visiting the Data Collection  
30 Site.  
31  
32  
33  
34

### 35 **How will the information I provide to the CLSA Memory Study be used?**

- 36  
37 • The data you provide to the CLSA Memory Study will be used to develop a  
38 method of identifying CLSA participants who have memory problems and  
39 individuals without memory problems in the main CLSA study.  
40  
41  
42  
43 • If the results of this study are published, your identity will remain confidential.  
44 It is expected that the information collected during this study will be used for  
45 analyses and will be published and presented to the scientific community at  
46 meetings and in journals.  
47  
48  
49

### 50 **How will my information be managed and kept safe?**

- 51  
52 • As with all studies that collect personal information, there is a remote  
53 possibility that third parties such as an insurance company or employer could  
54 access the information you have provided without permission of the CLSA.  
55 Many levels of safeguards have been put in place to reduce this risk.  
56  
57  
58



- All identifiable information will be kept in a secure database with a unique study number at McMaster University and will only be used to contact you. The information that you provide for us, without your name or contact information, will be stored in a secure database at McMaster University. Data collected by interviewers are transferred to the McMaster database over secure, encrypted connections.
- All CLSA staff will sign an agreement to protect your privacy and confidentiality.
- The CLSA Memory Study data will not be available to other researchers through our general study data access processes. Any requests to access the CLSA Memory Study data will need to be submitted to and approved by the CLSA Memory Study principal investigators. Researchers using data from the CLSA Memory Study will not be provided with any identifying information.
- Records identifying you as a participant in the CLSA Memory Study will be kept confidential and, to the extent permitted by the applicable laws, will not be disclosed or made publicly available, except as described in this document. If required, direct authorized representatives of the following organizations may look at your original identifiable data to check that the information collected for the study is correct and follow proper laws and guidelines:
  - The research ethics boards who oversee the ethical conduct of this study at each institution
- If you would like more information about how the CLSA protects your data, please contact us by email at **info@clsa-elcv.ca** or telephone at **1-866-999-8303**.
- Every effort will be made to keep the information you provide private, but risk of accidental disclosure is possible.



## What if I decide at some point that I no longer want to be part of the CLSA Memory Study?

- Your agreement to participate in the CLSA Memory Study is entirely voluntary.
- Your decision to participate in the CLSA Memory Study does not affect your ongoing participation in the main CLSA study that you have participated in since 2011-2015.
- You can choose to end your participation in this research (called withdrawal) at any time without having to provide a reason. If you choose to withdraw from the study, you are encouraged to contact the research team.
- If you decide to leave the study, we will stop contacting you for the CLSA Memory Study.
- You may ask that the information that was collected about you not be used for the study. However, once the study results have been released, we will not be able to be removed it from our datasets. If you have any questions about the CLSA Memory Study, please contact us using the provided email address or telephone number.

By email  
**info@clsa-elcv.ca**

By telephone  
**1-866-999-8303**

## Can participation in the CLSA Memory Study end early?

- Your participation in the CLSA Memory Study may be stopped early, and without your consent, for reasons such as:
  - New information shows that the research is no longer in your best interest
  - The research team decides to stop the study
  - The research ethics board withdraw permission for the study to continue

## What are the rights of participants in a research study?

- You will be told in a timely manner, about new information that may be relevant to your willingness to stay in this study.
- You have the right to be informed of the overall results of this research once the entire study is complete. As a person taking part in the main CLSA study, you have chosen if you would like to be sent regular updates about the study progress through electronic or mailed newsletters. The results of the CLSA Memory Study will be shared with all CLSA participants through those newsletters. Information about ongoing research, the research team, and general study results will be posted on the CLSA website ([www.clsa-elcv.ca](http://www.clsa-elcv.ca)) as well.
- Your rights to privacy are legally protected by federal and provincial laws that require safeguards to ensure that your privacy is respected.
- If you consent to participate in the CLSA Memory Study, you do not give up any of your legal rights against the research team, the Public Health Agency of Canada, or involved institutions for compensation, nor does this form relieve the research team, the Public Health Agency of Canada, or their agents of their legal and professional responsibilities.

- 1  
2  
3  
4  
5  
6  
7  
8  
9  
10  
11
- Each research ethics board has reviewed this study. The research ethics boards are responsible for ensuring that participants are informed of the risks associated with the research, and that participants are free to decide if participation is right for them. If you have any questions regarding your rights as a research participant, you may contact the Research Ethics Board associated with your Data Collection Site:

12  
13  
14  
15  
16  
17  
18  
19  
20  
21  
22  
23

**Note: Please do not call the Ethics office for rescheduling or cancelling appointment. Please call the CLSA toll-free number (1-866-999-8303).**

24  
25

**BRITISH COLUMBIA**

26  
27

**BURNABY**

28  
29  
30  
31  
32  
33  
34  
35  
36

Office of Research Ethics  
Simon Fraser University  
8888 University Drive  
Multi-Tenant Facility  
Burnaby BC V5A 1S6  
Phone: (778) 782-6593  
E-mail: dore@sfu.ca

37  
38  
39

**VICTORIA**

40  
41  
42  
43  
44  
45  
46  
47  
48  
49

Human Research Ethics Office of Research  
Services  
University of Victoria  
Administrative Services Building (ASB), Room  
B202  
PO Box 1700 Stn CSC  
3800 Finnerty Road  
Victoria BC V8W 2Y2  
Phone: (250) 472-4545

50  
51  
52  
53  
54  
55  
56  
57  
58

**VANCOUVER**

59  
60

University of British Columbia  
Office of Research Services  
6190 Agronomy Road  
Vancouver BC V6T 1Z3  
Phone: toll free 1-877-822-8298  
Phone: local (604) 822-8598

Vancouver Island Health Authority  
Research Ethics and Compliance Office  
Queen Alexandra Centre, Main Building Room  
205  
2400 Arbutus Road  
Victoria BC V8N 1V7  
Phone: (250) 519-6726

---

**ALBERTA**

**CALGARY**

Conjoint Health Research Ethics Board  
University of Calgary  
Phone: (403) 220-7990

**MANITOBA**

**WINNIPEG**

Bannatyne Campus  
Research Ethics Board  
University of Manitoba  
P126 Pathology Building  
770 Bannatyne Avenue  
Winnipeg MB R3E 0W3  
Phone: (204) 789-3883

---

**ONTARIO**

**HAMILTON**

Office of the Chair  
Hamilton Integrated Research Ethics Board  
(HiREB)  
293 Wellington Street North  
Hamilton ON L8L 8E7  
Phone: (905) 521-2100 ext. 42013

**OTTAWA**

Chair, Bruyère Research Ethics Board  
43 Bruyère Street  
Ottawa ON K1N 5C8  
Phone: (613) 562-6262 ext. 4003  
E-mail: REB@bruyere.org

**QUEBEC**

**MONTREAL**

Ms. Ilde Lepore  
Senior Ethics Administrator  
McGill Institutional Review Board  
McGill University Faculty of Medicine  
McIntyre Medical Building  
#633-3655 Promenade Sir William Osler  
Montreal QC H3G 1Y6  
Phone: (514) 398-8302  
E-mail: ilde.lepore@mcgill.ca

**SHERBROOKE**

CÉR du CIUSSS de l'Estrie-CHUS  
3001, 12e Avenue Nord,  
Sherbrooke, QC J1H 5N4  
819 346-1110, poste 12856  
ethique.recherche.ciusse-  
chus@ssss.gouv.qc.ca

---

**NOVA SCOTIA**

**HALIFAX**

Director  
Office of Research Ethics Administration  
Dalhousie University  
6299 South Street  
2nd Floor, Suite 231  
Halifax NS B3H 4H6  
Phone: (902)-494-1462

---

**NEWFOUNDLAND & LABRADOR**

**St. JOHN'S**

Memorial University  
Faculty of Medicine  
Health Research Ethics Authority  
2<sup>nd</sup> Floor, Bonaventure Place  
95 Bonaventure Avenue  
St. John's NL, A1B 2X5  
Phone: (709) 777-6974

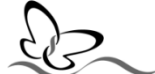

**clsa élcv**

Canadian Longitudinal Study on Aging  
Étude longitudinale canadienne sur le vieillissement

1  
2  
3  
4  
5  
6  
7  
8  
9  
10  
11  
12  
13  
14  
15  
16  
17  
18  
19  
20  
21  
22  
23  
24  
25  
26  
27  
28  
29  
30  
31  
32  
33  
34  
35  
36  
37  
38  
39  
40  
41  
42  
43  
44  
45  
46  
47  
48  
49  
50  
51  
52  
53  
54  
55  
56  
57  
58  
59  
60

For peer review only

1  
2  
3  
4  
5  
6  
7  
8  
9  
10  
11  
12  
13  
14  
15  
16  
17  
18  
19  
20  
21  
22  
23  
24  
25  
26  
27  
28  
29  
30  
31  
32  
33  
34  
35  
36  
37  
38  
39  
40  
41  
42  
43  
44  
45  
46  
47  
48  
49  
50  
51  
52  
53  
54  
55  
56  
57  
58  
59  
60

**Supplementary Appendix 2 – Participant Consent Scripts**

**Participant Consent Script – Tracking Cohort ..... 1**

**Participant Consent Script – Comprehensive Cohort ..... 11**

For peer review only



## CLSA Memory Study

Participant Consent and Administrative (Informant Identification, Medical Assessment Booking)

– Tracking Cohort Scripts Version 1.0

February 1<sup>st</sup>, 2023

Page 1 of 24

**Using the Canadian Longitudinal Study on Aging (CLSA) Platform to Validate Algorithms to Identify Participants with Dementia (Major Neurocognitive Disorder) and Mild Neurocognitive Disorder in the CLSA (CLSA Memory Study)**

**Participant Consent Script – Tracking Cohort**

Each section (e.g., PARINTRO, PARINFO, PARPRE and PARCON) represents a screen of the consent script.

**INTRODUCTION****PARINTRO1**

Hello. I am calling on behalf of the Canadian Longitudinal Study on Aging (CLSA) Memory Study. We recently provided you with an information package about the study. Have you had a chance to read the information package?

Yes \_\_\_\_\_ **Continue**

No \_\_\_\_\_ **Go to PARINTRO3**

**PARINTRO2**

After reading the CLSA Memory Study description, are you interested in discussing participating in the CLSA Memory Study?

Yes \_\_\_\_\_ **Go to PAR\_INFO1**

No \_\_\_\_\_ **Go to REFUSAL**

**PARINTRO3**

Did you receive the information package?

**[DO NOT READ: Participants were given the information package during their in-home interview or it was sent by mail or email if the participant had already completed their follow up 3 interview.]**

Yes \_\_\_\_\_ **Continue**

No \_\_\_\_\_ **Go to PARINTRO6**

**PARINTRO4**

Would you like for us to call back in a few days when you have had a chance to read the information package?

Yes \_\_\_\_\_ **Continue**

No \_\_\_\_\_ **Go to REFUSAL**

**PARINTRO5**

**[DO NOT READ: Book a call back time for the participant to complete the informed consent process. Please hit “previous” until you get to the question asking if the participant has received the information package so it will open at the correct spot when you call back.]**

## CLSA Memory Study

Participant Consent and Administrative (Informant Identification, Medical Assessment Booking)

– Tracking Cohort Scripts Version 1.0

February 1<sup>st</sup>, 2023

Page 2 of 24

Thank you for your interest in the CLSA Memory Study. We look forward to speaking with you again soon to review the information package.

**END INTERVIEW**

**PARINTRO6** Would you like for us to resend the CLSA Memory Study Participant Information Package?

Yes \_\_\_\_\_ **Continue**

No \_\_\_\_\_ **Go to REFUSAL**

**PARINTRO7** **[DO NOT READ: Please arrange for the CLSA Memory Study participant information package to be sent by email or mail to the participant. Let the participant know you will call back in a few days if the information package was sent by email or in a week or two if the information package was sent by mail. Please hit “previous” until you get to the question asking if the participant has received the information package so it will open in the correct spot when you call back.]**

Thank you for your interest in the CLSA Memory Study. We look forward to speaking with you again soon to review the information package.

**END INTERVIEW****INFORMATION**

**PARINFO1** During this phone call, we will review some of the key information about the CLSA Memory Study. You will be able to ask any questions you have about the study. If you are interested in participating, I will ask some questions to see if you are eligible to participate. If you are eligible to participate, we will complete the consent process.

The purpose of the CLSA Memory Study is to determine whether information that is collected through CLSA interviews can be used to correctly identify individuals who have memory problems and individuals without memory problems. Participants in the CLSA Memory Study will be asked to:

- 1) Undergo a medical assessment by a study physician at their local CLSA Data Collection Site. Please note, your participation in the CLSA has previously included interviews conducted over the phone. Participation in the CLSA Memory Study will require you to come into a CLSA Data Collection Site located within 50km of your home. CLSA Memory Study participant will be given \$30 to cover any expenses incurred when visiting the Data Collection Site. The assessment done at the Data Collection Site will include questions about medical history and a brief cognitive test which includes answering questions and drawing on paper. The doctor will also complete a neurocognitive examination, which involves assessing your ability to see, observing you move, and listening to you speak.
- 2) Identify a family member or friend to complete an interview by phone regarding your cognitive health, ability to complete daily tasks, and behaviour. Your family member or friend will not be required to come to the CLSA Data Collection Site.

**Continue**

**PARINFO2** At the end of the medical assessment, the study physician will tell you if they think there is a potential concern about your memory or if your memory seems normal. This is not considered a medical diagnosis. If the study physician identifies a potential concern about your memory, they will give you a letter about

## CLSA Memory Study

Participant Consent and Administrative (Informant Identification, Medical Assessment Booking)

– Tracking Cohort Scripts Version 1.0

February 1<sup>st</sup>, 2023

Page 3 of 24

the study and some of your individual results that you may want to share with your family doctor. If you do not have a family doctor, the study physician will provide you with some suggested resources regarding the potential concern about your memory.

There are no direct benefits to you from taking part in the CLSA Memory Study, but your participation will contribute to potentially developing new ways to identify people with memory problems.

There are no direct medical risks associated with participation in this study. However, some participants may feel tired or frustrated during the medical assessment. Participants may take breaks from the medical assessment as needed. Some participants may also feel worried about if the study physician will identify a potential concern about their memory. Participants will have an opportunity to speak with the study physician to discuss their concerns.

**Continue**

**PARINFO3** Do you have any questions you would like to ask about the CLSA Memory Study?

**[DO NOT READ: Respond to all participant questions before continuing.]**

**PARINFO4** Are you interested in finding out if you are eligible to participate in the CLSA Memory Study?

Yes \_\_\_\_\_ **Go to PARPRE1**

No \_\_\_\_\_ **Go to Refusal**

**PRECONSENT**

**PARPRE1** I am now going to ask you a few questions to determine your eligibility to participate in the CLSA Memory Study. You may refer to the participant information package to help you answer these questions. Please also let me know if you would like to discuss any of the questions before you answer.

**[Interviewer note: The goal of these questions is to determine if the participant understands enough about the CLSA Memory Study to provide informed consent. Participants are not expected to have the study information package memorized or to use the exact wording in their response.**

**If a participant does not answer a question correctly, a script will appear that provides information regarding that section of the information package. The question is then asked a second time. If the participant is unable to answer the question on the second attempt, the remaining questions will be skipped.]**

**PARPRE2A** What is the purpose of the study that was just described to you?

**[DO NOT READ: Did the participant's response indicate that the study is about identifying people with memory problems?]**

Yes \_\_\_\_\_ **Go to PARPRE3A**

No \_\_\_\_\_ **Continue**

## CLSA Memory Study

## Participant Consent and Administrative (Informant Identification, Medical Assessment Booking)

– Tracking Cohort Scripts Version 1.0

February 1<sup>st</sup>, 2023

Page 4 of 24

**PARPRE2B** The purpose of this research study is to determine whether information that is collected through CLSA interviews can be used to correctly identify individuals who have memory problems and individuals without memory problems.

In your own words, can you tell me why this study is being done?

**[DO NOT READ: Did the participant's response indicate that the study is about identifying people with memory problems?]**

Yes \_\_\_\_\_ **Continue**

No \_\_\_\_\_ **PARPRE11**

**PARPRE3A** Tell me something you will be asked to do during the study.

**[DO NOT READ: Did the participant's response indicate that they will have to come to the Data Collection Site to complete a medical assessment or that they would be asked to identify a family member or friend as an informant?]**

Yes \_\_\_\_\_ **PARPRE4A**

No \_\_\_\_\_ **Continue**

**PARPRE3B** Participants in the CLSA Memory Study will undergo a medical assessment by a study physician at the CLSA Data Collection Site. The assessment will include questions about medical history and a brief cognitive test which includes answering questions and drawing on paper. The doctor will also complete a neurocognitive examination, which involves assessing your ability to see, observing you move, and listening to you speak.

In your own words, can you tell me something you will be asked to do during the study?

**[DO NOT READ: Did the participant's response indicate that they will have to come to the Data Collection Site to complete a medical assessment or that they would be asked to identify a family member or friend as an informant?]**

Yes \_\_\_\_\_ **Continue**

No \_\_\_\_\_ **PARPRE11**

**PARPRE4A** **Can you** tell me a possible risk to you of being in this study?

**[DO NOT READ: Did the participant's response indicate that feeling tired or frustrated during the medical assessment or that worrying about the study physician identifying a potential concern about their cognition are potential risks of this study?]**

Yes \_\_\_\_\_ **Go to PARPRE5A**

No \_\_\_\_\_ **Continue**

## CLSA Memory Study

Participant Consent and Administrative (Informant Identification, Medical Assessment Booking)

– Tracking Cohort Scripts Version 1.0

February 1<sup>st</sup>, 2023

Page 5 of 24

**PARPRE4B** [DO NOT READ: Did the participant mention that they may be exposed to COVID-19 as a potential risk of this study?]

Yes \_\_\_\_\_ **Go to PARPRE4C**

No \_\_\_\_\_ **Go to PARPRE4D**

**PARPRE4C** In addition to the risk of exposure to COVID-19, feeling tired or frustrated during the medical assessment or worrying that the study physician will identify a potential concern about your cognition are potential risks of this study.

**Go to PARPRE5A**

**PARPRE4D** There are no direct medical risks associated with participation in this study. However, some participants may feel tired or frustrated during the medical assessment. Participants may take breaks from the medical assessment as needed. Some participants may also feel worried about if the study physician will identify a potential concern about their memory. Participants identified as having a potential concern about their memory will have an opportunity to speak with the study physician to discuss their concerns.

In your own words, can you please tell me a possible risk of participating in this study?

[DO NOT READ: Did the participant's response indicate that feeling tired or frustrated during the medical assessment **or** that worrying about the study physician identifying a potential concern about their cognition are potential risks of this study? ]

Yes \_\_\_\_\_ **Continue**

No \_\_\_\_\_ **PARPRE11**

**PARPRE5A** Will you receive a medical diagnosis by participating in this study?

[DO NOT READ: Did the participant's response indicate that they understand that being told if there is a potential concern about their memory or not by the study physician is not the same as a medical diagnosis?]

Yes \_\_\_\_\_ **Go to PARPRE6A**

No \_\_\_\_\_ **Continue**

**PARPRE5B** The study physician will determine if there is a potential concern about your memory or if your memory seems normal. This is not considered a medical diagnosis and does not replace your usual medical care. If the study physician identifies a potential concern about your memory, they will give you a letter about the study and some of your individual results that you may want to share with your family doctor. If you do not have a family doctor, the study physician will provide you with some suggested resources regarding the potential concern about your memory.

## CLSA Memory Study

Participant Consent and Administrative (Informant Identification, Medical Assessment Booking)

– Tracking Cohort Scripts Version 1.0

February 1<sup>st</sup>, 2023

Page 6 of 24

Based on this explanation, will you receive a medical diagnosis by participating in this study?

**DO NOT READ:** Did the participant's response indicate that they understand that being told if there is a potential concern about their memory or not by the study physician is not the same as a medical diagnosis?]

Yes \_\_\_\_\_ **Continue**

No \_\_\_\_\_ **PARPRE11**

**PARPRE6A** Do you have to participate in this study if you do not want to participate?

**[DO NOT READ:** Does the participant's response indicate that they understand that participation in the CLSA Memory Study is voluntary?]

Yes \_\_\_\_\_ **Go to PARPRE7A**

No \_\_\_\_\_ **Continue**

**PARPRE6B** Your agreement to participate in the CLSA Memory Study is voluntary. Your decision to participate in the CLSA Dementia Memory does not affect your ongoing participation in the main CLSA study that you have participated in since 2012-2015.

Based on this explanation, do you have to participate in this study if you do not want to participate?

**[DO NOT READ:** Does the participant's response indicate that they understand that participation in the CLSA Memory Study is voluntary?]

Yes \_\_\_\_\_ **Continue**

No \_\_\_\_\_ **PARPRE11**

**PARPRE7A** If you want to drop out of the study, when can you do this?

**[DO NOT READ:** Does the participant's response indicate that they understand that they may drop out (or withdraw) from the study at any point?]

Yes \_\_\_\_\_ **Go to PARPRE8A**

No \_\_\_\_\_ **Continue**

**PARPRE7B** You can choose to end your participation in the CLSA Memory Study at any time for any reason. If you decide to leave the study, we will stop contacting you about the CLSA Memory Study. You may ask that the information collected about you not be used for the study. However, if the study results have been released, we will not be able to remove your data from our datasets.

## CLSA Memory Study

Participant Consent and Administrative (Informant Identification, Medical Assessment Booking)

– Tracking Cohort Scripts Version 1.0

February 1<sup>st</sup>, 2023

Page 7 of 24

Based on this information, when can you drop out from the study?

**[DO NOT READ:** Did the participant's response indicate that they understand that they can drop out (or withdraw) from the study whenever they would like?]

Yes \_\_\_\_\_ **Continue**

No \_\_\_\_\_ **PARPRE11**

**PARPRE8A** Will your data for the CLSA Memory Study be kept confidential?

**[DO NOT READ:** Did the participant's response indicate that they understood that their data will be kept confidential?]

Yes \_\_\_\_\_ **PARPRE9**

No \_\_\_\_\_ **Continue**

**PARPRE8B** The data you provide to the CLSA Memory Study will be kept confidential. Information that can identify you such as your name and phone number will be kept in a secure database with a unique study identification number. This information will only be used to contact you. Researchers using data from the CLSA Memory Study will not be provided with any identifying information.

Based on this explanation, will your data be kept confidential?

**[DO NOT READ:** Did the participant's response indicate that they understood that their data will be kept confidential?]

Yes \_\_\_\_\_ **Continue**

No \_\_\_\_\_ **PARPRE11**

**PARPRE9** **[DO NOT READ:** Based on your discussion with the participant, do you feel that the participant has sufficient understanding of the CLSA Memory Study to provide consent to participate?]

Yes \_\_\_\_\_ **Continue**

No \_\_\_\_\_ **PARPRE12**

**PARPRE10** **[SHOW IF (PARPRE2A OR PARPRE2B) AND (PARPRE3A OR PARPRE3B) AND (PARPRE4A OR PARPRE4B OR PARPRE4D) AND (PARPRE5A OR PARPRE5B) AND (PARPRE6A OR PARPRE6B) AND (PARPRE7A OR PARPRE7B) AND (PARPRE8A OR PARPRE8B) AND PARPRE9 ARE "YES"]**

**[DO NOT READ:** The participant answered all of the questions correctly and is eligible to participate in the study.]

## CLSA Memory Study

Participant Consent and Administrative (Informant Identification, Medical Assessment Booking)

– Tracking Cohort Scripts Version 1.0

February 1<sup>st</sup>, 2023

Page 8 of 24

**Go to PARCON1****PARPRE11** [SHOW IF RESPONSE TO ONE OF PARPRE2B, PARPRE3B, PARPRE4D, PARPRE5B, PARPRE6B, PARPRE7B, OR PARPRE8B WAS “NO”]**[DO NOT READ:** The participant did not answer a question correctly.]**Continue****PARPRE12** Based on the questions I have asked you, we would like another staff member to speak with you to determine if you are eligible to participate in the CLSA Memory Study. Do I have your permission for the other staff member to contact you?Yes \_\_\_\_\_ **Go to PARPRE14**No \_\_\_\_\_ **Continue****PARPRE13** You have told me that you do not want another staff member to contact you. This means that you will not be able to participate in the CLSA Memory Study. Thank you for taking the time to learn about the CLSA Memory Study. We will be in touch with you in the future regarding the main CLSA study.**[DO NOT READ: Click “Next” and confirm the participant does not want to participate in the CLSA Memory Study (Go to REFUSAL1)]****PARPRE14** Thank you. The other staff member will call you in within the next week to further discuss your eligibility for the CLSA Memory Study.**[DO NOT READ:** Please include any relevant notes in Sabretooth that may assist the CLSA Memory Study staff member in their discussion with the participant.**END INTERVIEW]****CONSENT**

I will now read a list of statements. Please indicate you if agree or disagree with each statement.

**PARCON1** I have read the participant information package for the Canadian Longitudinal Study on Aging (CLSA) Memory Study and I understand it.Disagree \_\_\_\_\_ **Go to Refusal**Agree \_\_\_\_\_ **Continue****PARCON2** I have had a chance to ask questions about the study, and all my questions have been answered.Disagree \_\_\_\_\_ **Go to Refusal**Agree \_\_\_\_\_ **Continue**



## CLSA Memory Study

Participant Consent and Administrative (Informant Identification, Medical Assessment Booking)

– Tracking Cohort Scripts Version 1.0

February 1<sup>st</sup>, 2023

Page 9 of 24

**PARCON3** I do not give up any of my legal rights by verbally consenting to participate in the CLSA Memory Study.

Disagree \_\_\_\_\_ **Go to Refusal**

Agree \_\_\_\_\_ **Continue**

**PARCON4** I understand that my information will be used for research purposes only and this research may also have commercial uses that benefit society.

Disagree \_\_\_\_\_ **Go to Refusal**

Agree \_\_\_\_\_ **Continue**

**PARCON5** I understand that I can withdraw my consent at any time. If I choose to withdraw consent, I will be offered options for how the information already collected about me will be used.

Disagree \_\_\_\_\_ **Go to Refusal**

Agree \_\_\_\_\_ **Continue**

**PARCON6** I understand that participation in the CLSA Memory Study will require me to visit a CLSA Data Collection Site located within 50km of my home and that I will be given \$30 to cover any expenses incurred when visiting the Data Collection Site. My future participation in the main CLSA study will continue to be over the phone.

Disagree \_\_\_\_\_ **Go to Refusal**

Agree \_\_\_\_\_ **Continue**

**PARCON7** I will now read the consent statement and ask that you please respond with either 'yes' or 'no'. This will act as your consent to participate in the CLSA Memory Study. I agree to take part in the CLSA Memory Study.

Disagree \_\_\_\_\_ **Go to Refusal**

Agree \_\_\_\_\_ **Continue**

**PARCON8** Thank you for consenting to participate in the CLSA Memory Study.

**END INTERVIEW AND CLICK SUBMIT.**

**REFUSAL**

**IF ANSWER IS 'NO' TO PARINTRO1 OR PARINFO3 OR PARCON8 IF ANSWER IS 'DISAGREE' TO PARCON1, PARCON2, PARCON3, PARCON4, PARCON5, PARCON6, OR PARCON7**

## CLSA Memory Study

Participant Consent and Administrative (Informant Identification, Medical Assessment Booking)

– Tracking Cohort Scripts Version 1.0

February 1<sup>st</sup>, 2023

Page 10 of 24

**REFUSAL1**     **DO NOT READ: Check the "participant does not wish to participate" option below to confirm that the participant does not want to participate in the CLSA Memory Study.**

**REFUSAL2**     Thank you for taking the time to learn about the CLSA Memory Study.

We will be in touch with you in the future regarding the main CLSA study.

**END INTERVIEW AND CLICK SUBMIT.**

**CONCLUSION SCREEN**

**You have completed the CLSA Memory Study Participant Consent Script. You may now exit this window.**

## CLSA Memory Study

Participant Consent and Administrative (Informant Identification, Medical Assessment Booking)

– Tracking Cohort Scripts Version 1.0

February 1<sup>st</sup>, 2023

Page 11 of 24

**Using the Canadian Longitudinal Study on Aging (CLSA) Platform to Validate Algorithms to Identify Participants with Dementia (Major Neurocognitive Disorder) and Mild Neurocognitive Disorder in the CLSA (CLSA Memory Study)**

**Participant Consent Script – Comprehensive Cohort**

Each section (e.g., PARINTRO, PARINFO, PARPRE and PARCON) represents a screen of the consent script.

---

**FAMILY MEMBER OR FRIEND CONTACT INFORMATION**

**PARINF\_1** To participate in this study, we need you to identify a family member or friend that can respond to questions about your cognitive health, ability to complete daily tasks, and behaviour. Would you like to identify this person now or have us call back at another time?

Identify family member or friend **now** \_\_\_\_\_ **Continue**

Identify family member or friend **later** \_\_\_\_\_ **Go to PARINF\_5**

**PARINF\_2** **[DO NOT READ: Record the friend or family member identified by the participant as an alternate contact and label as “Memory Study Informant”. If the participant identifies an existing alternate contact as the Memory Study informant, please verify the contact information of the alternate contact before selecting “Memory Study Informant” as an alternate type.]**

**PARINF\_3** Thank you. In the information we sent you for the CLSA Memory Study, we included a copy of the Informant Information Package. Are you able to give the Informant Information Package to your family member or friend, or would you prefer for us to send them a copy?

Participant will give informant the information package \_\_\_\_\_ **Continue**

Data Collection Site will send information package \_\_\_\_\_ **Continue**

**PARINF\_4** We encourage you to discuss the CLSA Memory Study with **[family member or friend name]** in the next few days and to let him/her know to expect a phone call from us.

**Go to PARMED\_1**

**PARINF\_5** **[DO NOT READ: Book a call back time for the participant to provide the contact information for a family member or friend]**

When we call you to identify a family member or friend, we will also book an appointment for your medical assessment. Thank you for your interest in the CLSA Memory Study and we look forward to speaking with you again soon.

**END INTERVIEW.**

---

**MEDICAL ASSESSMENT BOOKING**

**PARMED\_1** Would you like to schedule a time for your medical assessment with the study physician?

## CLSA Memory Study

Participant Consent and Administrative (Informant Identification, Medical Assessment Booking)

– Tracking Cohort Scripts Version 1.0

February 1<sup>st</sup>, 2023

Page 12 of 24

Book medical assessment **now** \_\_\_\_\_ **Continue**

Book medical assessment **later** \_\_\_\_\_ **Go to PARMED\_3**

**PARMED\_2 [DO NOT READ, SITE SPECIFIC: Book medical assessment appointment using your preferred method and the participant's UID. Please confirm the address of the DCS with the participant and any necessary information about parking.]**

Thank you for your interest in the CLSA Memory Study and we look forward to seeing you at your medical assessment.

**END INTERVIEW AND CLICK SUBMIT**

**PARMED\_3 [DO NOT READ: Book a call back time for the participant to schedule a medical assessment.]**

Thank you for your interest in the CLSA Memory Study. We look forward to speaking with you again soon to book your medical assessment.

**END INTERVIEW**

**CONCLUSION SCREEN**

**You have completed the CLSA Memory Study Participant Informant Identification and Medical Assessment Booking Script. You may now exit this window.**

1 CLSA Memory Study  
 2 Participant Consent and  
 3 Administrative (Informant Identification, Medical Assessment Booking) Scripts Version 1.1  
 4 October 11, 2022

Page 1 of 24

5 **Using the Canadian Longitudinal Study on Aging (CLSA) Platform to Validate Algorithms to Identify**  
 6 **Participants with Dementia (Major Neurocognitive Disorder) and Mild Neurocognitive Disorder in the**  
 7 **CLSA (CLSA Memory Study)**

8  
 9 **PARTICIPANT CONSENT SCRIPT**

10  
 11 Each section (e.g., PARINTRO, PARINFO, PARPRE and PARCON) represents a screen of the consent script.

12  
 13 **INTRODUCTION**

14  
 15 **PARINTRO1**

16 Hello. I am calling on behalf of the Canadian Longitudinal Study on Aging (CLSA) Memory Study. We  
 17 recently provided you with an information package about the study. Have you had a chance to read the  
 18 information package?

19  
 20 Yes \_\_\_\_\_ **Continue**

21  
 22 No \_\_\_\_\_ **Go to PARINTRO3**

23  
 24  
 25 **PARINTRO2**

26 After reading the CLSA Memory Study description, are you interested in discussing participating in the  
 27 CLSA Memory Study?

28 Yes \_\_\_\_\_ **Go to PAR\_INFO1**

29  
 30 No \_\_\_\_\_ **Go to REFUSAL**

31  
 32  
 33 **PARINTRO3**

34 Did you receive the information package?

35 **[DO NOT READ: Participants were given the information package during their in-home interview or**  
 36 **it was sent by mail or email if the participant had already completed their follow up 3 interview.]**

37  
 38 Yes \_\_\_\_\_ **Continue**

39  
 40 No \_\_\_\_\_ **Go to PARINTRO6**

41  
 42  
 43 **PARINTRO4**

44 Would you like for us to call back in a few days when you have had a chance to read the information  
 45 package?

46 Yes \_\_\_\_\_ **Continue**

47  
 48 No \_\_\_\_\_ **Go to REFUSAL**

49  
 50  
 51 **PARINTRO5**

52 **[DO NOT READ: Book a call back time for the participant to complete the informed consent**  
 53 **process. Please hit "previous" until you get to the question asking if the participant has received**  
 54 **the information package so it will open at the correct spot when you call back.]**

55 Thank you for your interest in the CLSA Memory Study. We look forward to speaking with you again  
 56 soon to review the information package.

57  
 58 **END INTERVIEW**

1 CLSA Memory Study  
 2 Participant Consent and  
 3 Administrative (Informant Identification, Medical Assessment Booking) Scripts Version 1.1  
 4 October 11, 2022

Page 2 of 24

8 **PARINTRO6** Would you like for us to resend the CLSA Memory Study Participant Information Package?

10 Yes \_\_\_\_\_ **Continue**

12 No \_\_\_\_\_ **Go to REFUSAL**

15 **PARINTRO7** **[DO NOT READ: Please arrange for the CLSA Memory Study participant information package to be sent by email or mail to the participant. Let the participant know you will call back in a few days if the information package was sent by email or in a week or two if the information package was sent by mail. Please hit “previous” until you get to the question asking if the participant has received the information package so it will open in the correct spot when you call back.]**

21 Thank you for your interest in the CLSA Memory Study. We look forward to speaking with you again soon to review the information package.

23 **END INTERVIEW**

---

## 27 INFORMATION

28 **PARINFO1** During this phone call, we will review some of the key information about the CLSA Memory Study. You  
 29 will be able to ask any questions you have about the study. If you are interested in participating, I will ask  
 30 some questions to see if you are eligible to participate. If you are eligible to participate, we will complete  
 31 the consent process.

33 The purpose of the CLSA Memory Study is to determine whether information that is collected through  
 34 CLSA interviews can be used to correctly identify individuals who have memory problems and individuals  
 35 without memory problems. Participants in the CLSA Memory Study will be asked to:

- 37 1) Undergo a medical assessment by a study physician at their local CLSA Data Collection Site. The  
 38 assessment will include questions about medical history and a brief cognitive test which includes  
 39 answering questions and drawing on paper. The doctor will also complete a neurocognitive  
 40 examination, which involves assessing your ability to see, observing you move, and listening to you  
 41 speak.
- 43 2) Identify a family member or friend to complete an interview by phone regarding your cognitive health,  
 44 ability to complete daily tasks, and behaviour.

46 **Continue**

48 **PARINFO2** At the end of the medical assessment, the study physician will tell you if they think there is a potential  
 49 concern about your memory or if your memory seems normal. This is not considered a medical diagnosis.  
 50 If the study physician identifies a potential concern about your memory, they will give you a letter about  
 51 the study and some of your individual results that you may want to share with your family doctor. If you do  
 52 not have a family doctor, the study physician will provide you with some suggested resources regarding  
 53 the potential concern about your memory.

55 There are no direct benefits to you from taking part in the CLSA Memory Study, but your participation will  
 56 contribute to potentially developing new ways to identify people with memory problems.

58 There are no direct medical risks associated with participation in this study. However, some participants  
 59 may feel tired or frustrated during the medical assessment. Participants may take breaks from the medical

CLSA Memory Study  
Participant Consent and  
Administrative (Informant Identification, Medical Assessment Booking) Scripts Version 1.1  
October 11, 2022

Page 3 of 24

assessment as needed. Some participants may also feel worried about if the study physician will identify a potential concern about their memory. Participants will have an opportunity to speak with the study physician to discuss their concerns.

**Continue**

**PARINFO3** Do you have any questions you would like to ask about the CLSA Memory Study?

**[DO NOT READ: Respond to all participant questions before continuing.]**

**PARINFO4** Are you interested in finding out if you are eligible to participate in the CLSA Memory Study?

Yes \_\_\_\_\_ **Go to PARPRE1**

No \_\_\_\_\_ **Go to Refusal**

**PRECONSENT**

**PARPRE1** I am now going to ask you a few questions to determine your eligibility to participate in the CLSA Memory Study. You may refer to the participant information package to help you answer these questions. Please also let me know if you would like to discuss any of the questions before you answer.

**[Interviewer note: The goal of these questions is to determine if the participant understands enough about the CLSA Memory Study to provide informed consent. Participants are not expected to have the study information package memorized or to use the exact wording in their response.]**

**If a participant does not answer a question correctly, a script will appear that provides information regarding that section of the information package. The question is then asked a second time. If the participant is unable to answer the question on the second attempt, the remaining questions will be skipped.]**

**PARPRE2A** What is the purpose of the study that was just described to you?

**[DO NOT READ: Did the participant's response indicate that the study is about identifying people with memory problems?]**

Yes \_\_\_\_\_ **Go to PARPRE3A**

No \_\_\_\_\_ **Continue**

**PARPRE2B** The purpose of this research study is to determine whether information that is collected through CLSA interviews can be used to correctly identify individuals who have memory problems and individuals without memory problems.

In your own words, can you tell me why this study is being done?

**[DO NOT READ: Did the participant's response indicate that the study is about identifying people with memory problems?]**

Yes \_\_\_\_\_ **Continue**

No \_\_\_\_\_ **PARPRE11**

1 CLSA Memory Study  
 2 Participant Consent and  
 3 Administrative (Informant Identification, Medical Assessment Booking) Scripts Version 1.1  
 4 October 11, 2022

Page 4 of 24

7 **PARPRE3A** Tell me something you will be asked to do during the study.

9 **[DO NOT READ:** Did the participant's response indicate that they will have to come to the Data  
 10 Collection Site to complete a medical assessment or that they would be asked to identify a family  
 11 member or friend as an informant?]

13 Yes \_\_\_\_\_ **PARPRE4A**

15 No \_\_\_\_\_ **Continue**

18 **PARPRE3B** Participants in the CLSA Memory Study will undergo a medical assessment by a study physician at the  
 19 CLSA Data Collection Site. The assessment will include questions about medical history and a brief  
 20 cognitive test which includes answering questions and drawing on paper. The doctor will also complete a  
 21 neurocognitive examination, which involves assessing your ability to see, observing you move, and  
 22 listening to you speak.

23 In your own words, can you tell me something you will be asked to do during the study?

26 **[DO NOT READ:** Did the participant's response indicate that they will have to come to the Data Collection  
 27 Site to complete a medical assessment or that they would be asked to identify a family member or friend  
 28 as an informant?]

30 Yes \_\_\_\_\_ **Continue**

32 No \_\_\_\_\_ **PARPRE11**

35 **PARPRE4A** **Can you** tell me a possible risk to you of being in this study?

38 **[DO NOT READ:** Did the participant's response indicate that feeling tired or frustrated during the medical  
 39 assessment **or** that worrying about the study physician identifying a potential concern about their  
 40 cognition are potential risks of this study?]

42 Yes \_\_\_\_\_ **Go to PARPRE5A**

44 No \_\_\_\_\_ **Continue**

47 **PARPRE4B** **[DO NOT READ:** Did the participant mention that they may be exposed to COVID-19 as a potential risk of  
 48 this study?]

50 Yes \_\_\_\_\_ **Go to PARPRE4C**

52 No \_\_\_\_\_ **Go to PARPRE4D**



CLSA Memory Study  
Participant Consent and  
Administrative (Informant Identification, Medical Assessment Booking) Scripts Version 1.1  
October 11, 2022

Page 5 of 24

**PARPRE4C** In addition to the risk of exposure to COVID-19, feeling tired or frustrated during the medical assessment or worrying that the study physician will identify a potential concern about your cognition are potential risks of this study.

**Go to PARPRE5A**

**PARPRE4D** There are no direct medical risks associated with participation in this study. However, some participants may feel tired or frustrated during the medical assessment. Participants may take breaks from the medical assessment as needed. Some participants may also feel worried about if the study physician will identify a potential concern about their memory. Participants identified as having a potential concern about their memory will have an opportunity to speak with the study physician to discuss their concerns.

In your own words, can you please tell me a possible risk of participating in this study?

**[DO NOT READ:** Did the participant's response indicate that feeling tired or frustrated during the medical assessment **or** that worrying about the study physician identifying a potential concern about their cognition are potential risks of this study? ]

Yes \_\_\_\_\_ **Continue**

No \_\_\_\_\_ **PARPRE11**

**PARPRE5A** Will you receive a medical diagnosis by participating in this study?

**[DO NOT READ:** Did the participant's response indicate that they understand that being told if there is a potential concern about their memory or not by the study physician is not the same as a medical diagnosis?]

Yes \_\_\_\_\_ **Go to PARPRE6A**

No \_\_\_\_\_ **Continue**

**PARPRE5B** The study physician will determine if there is a potential concern about your memory or if your memory seems normal. This is not considered a medical diagnosis and does not replace your usual medical care. If the study physician identifies a potential concern about your memory, they will give you a letter about the study and some of your individual results that you may want to share with your family doctor. If you do not have a family doctor, the study physician will provide you with some suggested resources regarding the potential concern about your memory.

Based on this explanation, will you receive a medical diagnosis by participating in this study?

**DO NOT READ:** Did the participant's response indicate that they understand that being told if there is a potential concern about their memory or not by the study physician is not the same as a medical diagnosis?]

Yes \_\_\_\_\_ **Continue**

No \_\_\_\_\_ **PARPRE11**

1 CLSA Memory Study  
2 Participant Consent and  
3 Administrative (Informant Identification, Medical Assessment Booking) Scripts Version 1.1  
4 October 11, 2022

Page 6 of 24

6 **PARPRE6A** Do you have to participate in this study if you do not want to participate?

9 **[DO NOT READ:** Does the participant's response indicate that they understand that participation in the  
10 CLSA Memory Study is voluntary?]

13 Yes \_\_\_\_\_ **Go to PARPRE7A**

15 No \_\_\_\_\_ **Continue**

18 **PARPRE6B** Your agreement to participate in the CLSA Memory Study is voluntary. Your decision to participate in the  
19 CLSA Dementia Memory does not affect your ongoing participation in the main CLSA study that you have  
20 participated in since 2012-2015.

21 Based on this explanation, do you have to participate in this study if you do not want to participate?

24 **[DO NOT READ:** Does the participant's response indicate that they understand that participation in the  
25 CLSA Memory Study is voluntary?]

26 Yes \_\_\_\_\_ **Continue**

28 No \_\_\_\_\_ **PARPRE11**

32 **PARPRE7A** If you want to drop out of the study, when can you do this?

34 **[DO NOT READ:** Does the participant's response indicate that they understand that they may drop out (or  
35 withdraw) from the study at any point?]

37 Yes \_\_\_\_\_ **Go to PARPRE8A**

39 No \_\_\_\_\_ **Continue**

42 **PARPRE7B** You can choose to end your participation in the CLSA Memory Study at any time for any reason. If you  
43 decide to leave the study, we will stop contacting you about the CLSA Memory Study. You may ask that  
44 the information collected about you not be used for the study. However, if the study results have been  
45 released, we will not be able to remove your data from our datasets.

46 Based on this information, when can you drop out from the study?

49 **[DO NOT READ:** Did the participant's response indicate that they understand that they can drop out (or  
50 withdraw) from the study whenever they would like?]

52 Yes \_\_\_\_\_ **Continue**

54 No \_\_\_\_\_ **PARPRE11**

CLSA Memory Study  
 Participant Consent and  
 Administrative (Informant Identification, Medical Assessment Booking) Scripts Version 1.1  
 October 11, 2022

**PARPRE8A** Will your data for the CLSA Memory Study be kept confidential?

**[DO NOT READ:** Did the participant's response indicate that they understood that their data will be kept confidential?]

Yes \_\_\_\_\_ **PARPRE9**

No \_\_\_\_\_ **Continue**

**PARPRE8B** The data you provide to the CLSA Memory Study will be kept confidential. Information that can identify you such as your name and phone number will be kept in a secure database with a unique study identification number. This information will only be used to contact you. Researchers using data from the CLSA Memory Study will not be provided with any identifying information.

Based on this explanation, will your data be kept confidential?

**[DO NOT READ:** Did the participant's response indicate that they understood that their data will be kept confidential?]

Yes \_\_\_\_\_ **Continue**

No \_\_\_\_\_ **PARPRE11**

**PARPRE9** **[DO NOT READ:** Based on your discussion with the participant, do you feel that the participant has sufficient understanding of the CLSA Memory Study to provide consent to participate?]

Yes \_\_\_\_\_ **Continue**

No \_\_\_\_\_ **PARPRE12**

**PARPRE10** **[SHOW IF (PARPRE2A OR PARPRE2B) AND (PARPRE3A OR PARPRE3B) AND (PARPRE4A OR PARPRE4B OR PARPRE4D) AND (PARPRE5A OR PARPRE5B) AND (PARPRE6A OR PARPRE6B) AND (PARPRE7A OR PARPRE7B) AND (PARPRE8A OR PARPRE8B) AND PARPRE9 ARE "YES"]**

**[DO NOT READ:** The participant answered all of the questions correctly and is eligible to participate in the study.]

**Go to PARCON1**

**PARPRE11** **[SHOW IF RESPONSE TO ONE OF PARPRE2B, PARPRE3B, PARPRE4D, PARPRE5B, PARPRE6B, PARPRE7B, OR PARPRE8B WAS "NO"]**

**[DO NOT READ:** The participant did not answer a question correctly.]

**Continue**

1 CLSA Memory Study  
 2 Participant Consent and  
 3 Administrative (Informant Identification, Medical Assessment Booking) Scripts Version 1.1  
 4 October 11, 2022

Page 8 of 24

6 **PARPRE12** Based on the questions I have asked you, we would like another staff member to speak with you to  
 7 determine if you are eligible to participate in the CLSA Memory Study. Do I have your permission for the  
 8 other staff member to contact you?

10 Yes \_\_\_\_\_ **Go to PARPRE14**

12 No \_\_\_\_\_ **Continue**

15 **PARPRE13** You have told me that you do not want another staff member to contact you. This means that you will  
 16 not be able to participate in the CLSA Memory Study. Thank you for taking the time to learn about the  
 17 CLSA Memory Study. We will be in touch with you in the future regarding the main CLSA study.

18 **[DO NOT READ: Click "Next" and confirm the participant does not want to participate in the**  
 19 **CLSA Memory Study (Go to REFUSAL1)]**

22 **PARPRE14** Thank you. The other staff member will call you in within the next week to further discuss your eligibility  
 23 for the CLSA Memory Study.

25 **[DO NOT READ: Please include any relevant notes in Sabretooth that may assist the CLSA Memory**  
 26 **Study staff member in their discussion with the participant.**

28 **END INTERVIEW]**

---

### 31 CONSENT

33 I will now read a list of statements. Please indicate you if agree or disagree with each statement.

35 **PARCON1** I have read the participant information package for the Canadian Longitudinal Study on Aging (CLSA)  
 36 Memory Study and I understand it.

38 Disagree \_\_\_\_\_ **Go to Refusal**

40 Agree \_\_\_\_\_ **Continue**

42 **PARCON2** I have had a chance to ask questions about the study, and all my questions have been answered.

44 Disagree \_\_\_\_\_ **Go to Refusal**

46 Agree \_\_\_\_\_ **Continue**

48 **PARCON3** I do not give up any of my legal rights by verbally consenting to participate in the CLSA Memory Study.

50 Disagree \_\_\_\_\_ **Go to Refusal**

52 Agree \_\_\_\_\_ **Continue**

56 **PARCON4** I understand that my information will be used for research purposes only and this research may also  
 57 have commercial uses that benefit society.

1 CLSA Memory Study  
 2 Participant Consent and  
 3 Administrative (Informant Identification, Medical Assessment Booking) Scripts Version 1.1  
 4 October 11, 2022

Page 9 of 24

5 Disagree \_\_\_\_\_ **Go to Refusal**

6 Agree \_\_\_\_\_ **Continue**

7  
 8  
 9  
 10 **PARCON5** I understand that I can withdraw my consent at any time. If I choose to withdraw consent, I will be  
 11 offered options for how the information already collected about me will be used.

12 Disagree \_\_\_\_\_ **Go to Refusal**

13 Agree \_\_\_\_\_ **Continue**

14  
 15  
 16  
 17 **PARCON6** I will now read the consent statement and ask that you please respond with either 'yes' or 'no'. This will  
 18 act as your consent to participate in the CLSA Memory Study. I agree to take part in the CLSA Memory  
 19 Study.

20 Disagree \_\_\_\_\_ **Go to Refusal**

21 Agree \_\_\_\_\_ **Continue**

22  
 23  
 24  
 25  
 26 **PARCON7** Thank you for consenting to participate in the CLSA Memory Study.

27 **END INTERVIEW AND CLICK SUBMIT.**

### 31 REFUSAL

32  
 33 **IF ANSWER IS 'NO' TO PARINTRO1 OR PARINFO3 OR PARCON8 IF ANSWER IS 'DISAGREE' TO PARCON1,**  
 34 **PARCON2, PARCON3, PARCON4, PARCON5, PARCON6, OR PARCON7**

35  
 36  
 37 **REFUSAL1 DO NOT READ: Check the "participant does not wish to participate" option below to confirm that**  
 38 **the participant does not want to participate in the CLSA Memory Study.**

39  
 40  
 41 **REFUSAL2** Thank you for taking the time to learn about the CLSA Memory Study.

42 We will be in touch with you in the future regarding the main CLSA study.

43  
 44 **END INTERVIEW AND CLICK SUBMIT.**

### 48 CONCLUSION SCREEN

49  
 50  
 51 **You have completed the CLSA Memory Study Participant Consent Script. You may now exit this window.**

1 CLSA Memory Study  
 2 Participant Consent and  
 3 Administrative (Informant Identification, Medical Assessment Booking) Scripts Version 1.1  
 4 October 11, 2022

Page 10 of 24

5 **Using the Canadian Longitudinal Study on Aging (CLSA) Platform to Validate Algorithms to Identify**  
 6 **Participants with Dementia (Major Neurocognitive Disorder) and Mild Neurocognitive Disorder in the**  
 7 **CLSA (CLSA Memory Study)**  
 8

9 **PARTICIPANT INFORMANT IDENTIFICATION AND MEDICAL ASSESSMENT BOOKING SCRIPT**

10 Each section (e.g., PARINTRO, PARINFO, PARPRE and PARCON) represents a screen of the consent script.  
 11

12 **FAMILY MEMBER OR FRIEND CONTACT INFORMATION**  
 13

14  
 15 **PARINF\_1** To participate in this study, we need you to identify a family member or friend that can respond to  
 16 questions about your cognitive health, ability to complete daily tasks, and behaviour. Would you like to  
 17 identify this person now or have us call back at another time?  
 18

19 Identify family member or friend **now** \_\_\_\_\_ **Continue**

20 Identify family member or friend **later** \_\_\_\_\_ **Go to PARINF\_5**  
 21  
 22

23  
 24  
 25 **PARINF\_2** **[DO NOT READ: Record the friend or family member identified by the participant as an alternate**  
 26 **contact and label as “Memory Study Informant”. If the participant identifies an existing alternate**  
 27 **contact as the Memory Study informant, please verify the contact information of the alternate**  
 28 **contact before selecting “Memory Study Informant” as an alternate type.]**  
 29

30 **PARINF\_3** Thank you. In the information we sent you for the CLSA Memory Study, we included a copy of the  
 31 Informant Information Package. Are you able to give the Informant Information Package to your family  
 32 member or friend, or would you prefer for us to send them a copy?  
 33

34 Participant will give informant the information package \_\_\_\_\_ **Continue**

35 Data Collection Site will send information package \_\_\_\_\_ **Continue**  
 36  
 37

38  
 39  
 40 **PARINF\_4** We encourage you to discuss the CLSA Memory Study with **[family member or friend name]** in the next  
 41 few days and to let him/her know to expect a phone call from us.  
 42

43 **Go to PARMED\_1**  
 44

45 **PARINF\_5** **[DO NOT READ: Book a call back time for the participant to provide the contact information for a**  
 46 **family member or friend]**  
 47

48 When we call you to identify a family member or friend, we will also book an appointment for your medical  
 49 assessment. Thank you for your interest in the CLSA Memory Study and we look forward to speaking with  
 50 you again soon.  
 51

52 **END INTERVIEW.**  
 53  
 54

55 **MEDICAL ASSESSMENT BOOKING**  
 56

57 **PARMED\_1** Would you like to schedule a time for your medical assessment with the study physician?  
 58

CLSA Memory Study  
Participant Consent and  
Administrative (Informant Identification, Medical Assessment Booking) Scripts Version 1.1  
October 11, 2022

Book medical assessment **now** \_\_\_\_\_ **Continue**

Book medical assessment **later** \_\_\_\_\_ **Go to PARMED\_3**

**PARMED\_2 [DO NOT READ, SITE SPECIFIC: Book medical assessment appointment using your preferred method and the participant's UID.**

Thank you for your interest in the CLSA Memory Study and we look forward to seeing you at your medical assessment.

**END INTERVIEW AND CLICK SUBMIT**

**PARMED\_3 [DO NOT READ: Book a call back time for the participant to schedule a medical assessment.]**

Thank you for your interest in the CLSA Memory Study. We look forward to speaking with you again soon to book your medical assessment.

**END INTERVIEW**

**CONCLUSION SCREEN**

**You have completed the CLSA Memory Study Participant Informant Identification and Medical Assessment Booking Script. You may now exit this window.**



## Supplementary Appendix 3 – Informant Information Package

1  
2  
3  
4  
5  
6  
7  
8  
9  
10  
11  
12  
13  
14  
15  
16  
17  
18  
19  
20  
21  
22  
23  
24  
25  
26  
27  
28  
29  
30  
31  
32  
33  
34  
35  
36  
37  
38  
39  
40  
41  
42  
43  
44  
45  
46  
47  
48  
49  
50  
51  
52  
53  
54  
55  
56  
57  
58  
59  
60

Family Member or Friend Information Package Cover Letter ..... 2  
 Family Member or Friend Study Information Package ..... **Error! Bookmark not defined.**

For peer review only



## Family Member or Friend Information Package Cover Letter

Dear [Informant],

Your family member or friend, [participant name], is a participant in the Canadian Longitudinal Study on Aging (CLSA) and is taking part in the CLSA Memory Study. Participants in this study were asked to identify someone who could answer questions about their cognitive health, ability to complete daily tasks, and behaviour. [Participant name] selected you as this person.

The purpose of this CLSA Memory Study is to determine whether information that is collected through CLSA interviews can be used to correctly identify individuals who have memory problems and individuals without memory problems.

If you choose to take part, you will complete a 20-minute telephone interview at a time convenient to you.

This study of the CLSA is funded by the Public Health Agency of Canada (PHAC). The CLSA Memory Study is being led by Dr. Lauren Griffith, Dr. Andrew Costa, and Dr. Parminder Raina, all from McMaster University. Other researchers from universities across Canada are also involved.

[Attached to this email is/This package contains] the **Family Member or Friend Study Information Package** that will provide you with information to help you make an informed choice about if you would like to take part in this study.

Please read the **Family Member or Friend Study Information Package** carefully. We will call you in the next couple of weeks and you will have an opportunity to ask any questions you may have.

If you wish to contact us directly, please feel free to:

- Email at [info@clsa-elcv.ca](mailto:info@clsa-elcv.ca)
- Call our toll-free line at **1-866-999-8303**

Thank you,

## FAMILY MEMBER OR FRIEND STUDY INFORMATION PACKAGE

**Study Title:** Canadian Longitudinal Study on Aging (CLSA) Memory Study

**Principal Investigators:**

Dr. Lauren Griffith, Department of Health Research Methods, Evidence, and Impact, McMaster University

Dr. Andrew Costa, Department of Health Research Methods, Evidence, and Impact, McMaster University

Dr. Parminder Raina, Department of Health Research Methods, Evidence, and Impact, McMaster University

**Co-Investigators:**

**Newfoundland and Labrador**

Dr. Gerry Mugford – Memorial University

**Nova Scotia**

Dr. Susan Kirkland – Dalhousie University

**Quebec**

Dr. Benoît Cossette – Université de Sherbrooke

Dr. Christina Wolfson – McGill University

**Ontario**

Dr. Cynthia Balion – McMaster University

Dr. Aaron Jones – McMaster University

Dr. Alexandra Mayhew – McMaster University

Dr. Vanessa Taler – University of Ottawa

Dr. Mary Thompson – University of Waterloo

Dr. Changbao Wu – University of Waterloo

**Manitoba**

Dr. Verena Menec – University of Manitoba

**Saskatchewan**

Dr. Megan O’Connell – University of Saskatchewan

**Alberta**

Dr. David Hogan – University of Calgary

Dr. Eric Smith – University of Calgary

British Columbia

Dr. Scott Hofer – University of Victoria

Dr. Teresa Liu-Ambrose – University of British Columbia

Dr. Andrew Wister – Simon Fraser University

**Supported by:**

The Public Health Agency of Canada

**Conflicts of interest:** There are no conflicts of interest to declare related to this study.

## What is the purpose of the CLSA Memory Study?

- The purpose of this research study is to determine whether information that is collected through CLSA interviews can be used to correctly identify individuals who have memory problems and individuals without memory problems.

## How many people will take part in the CLSA Memory Study?

- We will recruit approximately 600 participants from the 11 CLSA Data Collection Sites in Canada (Surrey, British Columbia; Victoria, British Columbia; Vancouver, British Columbia; Calgary, Alberta; Winnipeg, Manitoba; Hamilton, Ontario; Ottawa, Ontario; Montréal, Quebec; Sherbrooke, Quebec; Halifax, Nova Scotia; and St. John's, Newfoundland).
- This study will take approximately two years to complete and the results should be known in approximately three years.

## What will I be asked to do if I volunteer to be part of the CLSA Memory Study?

- **A staff member from your family member or friend's local CLSA Data Collection Site will contact you to discuss the CLSA Memory Study in the next couple of weeks.** You will have an opportunity to ask any questions that you may have. If you are interested in participating in the CLSA Memory Study, the CLSA staff member will ask for your consent to participate.
- **You will be asked to complete an interview over the phone with a staff member from the CLSA.** You will be asked questions about your family member or friend's medical history, habits, and ability to complete everyday tasks. The interview will take approximately 20 minutes and can either be completed during this phone call or will be scheduled at a time convenient for you. Your family member or friend does not need to be present for your interview.

- The information you provide will be reviewed by a study physician who will also complete a medical assessment with your family member or friend. The information from your interview and the medical assessment will allow the study physician to determine if there is a potential concern about your family member or friend's memory or if their memory appears normal.
- The study physician may contact you by phone if they have any follow-up questions about the information you provide.

### **How will the information I provide to the CLSA Memory Study be used?**

- The data you provide to the CLSA Memory Study will be used to develop a method of identifying CLSA participants who have memory problems and individuals without memory problems in the main CLSA study.
- If the results of this study are published, your identity will remain confidential. It is expected that the information collected during this study will be used for analyses and will be published and presented to the scientific community at meetings and in journals.

### **How will my information be managed and kept safe?**

- As with all studies that collect personal information, there is a remote possibility that third parties such as an insurance company or employer could access the information you have provided without permission of the CLSA. Many levels of safeguards have been put in place to reduce this risk.
- All identifiable information will be kept in a secure database with a unique study number at McMaster University and will only be used to contact you. The information that you provide for us, without your name or contact information, will be stored in a secure database at McMaster University. Data collected by interviewers are transferred to the McMaster database over secure, encrypted connections.
- All CLSA staff will sign an agreement to protect your privacy and confidentiality.

- The CLSA Memory Study data will not be available to other researchers through our general study data access processes. Any requests to access the CLSA Memory Study data will need to be submitted to and approved by the CLSA Memory Study principal investigators. Researchers using data from the CLSA Memory Study will not be provided with any identifying information.
- Records identifying you as a participant in the CLSA Memory Study will be kept confidential and, to the extent permitted by the applicable laws, will not be disclosed or made publicly available, except as described in this document. If required, direct authorized representatives of the following organizations may look at your original identifiable data to check that the information collected for the study is correct and follow proper laws and guidelines:
  - The research ethics boards who oversee the ethical conduct of this study at each institution
- If you would like more information about how the CLSA protects your data, please contact us by email at **info@clsa-elcv.ca** or telephone at **1-866-999-8303**.
- Every effort will be made to keep the information you provide private, but risk of accidental disclosure is possible.

### **What if I decide at some point that I no longer want to be part of the CLSA Memory Study?**

- Your agreement to participate in the CLSA Memory Study is entirely voluntary.
- If you decide to not take part in the CLSA Memory Study, there will be no penalty or loss of benefit to you
- Your decision to participate in the CLSA Memory Study does not affect your family member or friend's ongoing participation in the CLSA Memory Study, or the main CLSA study that they have participated in since 2011-2015.
- You can choose to end your participation in this research (called withdrawal) at any time without having to provide a reason. If you choose to withdraw from the study, you are encouraged to contact the research team.

- If you decide to leave the study, we will stop contacting you for the CLSA Memory Study. You may ask that the information that you provided not be used for the study. However, once the study results have been released, we will not be able to be remove it from our datasets. If you have any questions about the CLSA Memory Study, please contact us using the provided email address or telephone number.

By email

**info@clsa-elcv.ca**

By telephone

**1-866-999-8303**

### **Can participation in the CLSA Memory Study end early?**

- Your participation in the CLSA Memory Study may be stopped early, and without your consent, for reasons such as:
  - New information shows that the research is no longer in your best interest
  - The research team decides to stop the study
  - The research ethics board withdraws permission for the study to continue
  - Your family member or friend decides to withdraw from the CLSA Memory Study

### **Will I get any personal benefit from taking part in the CLSA Memory Study?**

- You will not get any direct personal benefit from taking part in the CLSA Memory Study.
- Your participation in the CLSA Memory Study will contribute to potentially developing new ways to identify individuals with memory problems, even if they have not been diagnosed by a physician.

## Are there any risks to taking part in the CLSA Memory Study?

- There are no direct medical risks associated with participation in this study.

## What are the rights of participants in a research study?

- You will be told in a timely manner about new information that may be relevant to your willingness to stay in this study.
- You have the right to be informed of the overall results of this research once the entire study is complete. Information about ongoing research, the research team, and general study results will be posted on the CLSA website ([www.clsa-elcv.ca](http://www.clsa-elcv.ca)) as well.
- Your rights to privacy are legally protected by federal and provincial laws that require safeguards to ensure that your privacy is respected.
- If you consent to participate in the CLSA Memory Study, you do not give up any of your legal rights against the research team, the Public Health Agency of Canada, or involved institutions for compensation, nor does this form relieve the research team, the Public Health Agency of Canada, or their agents of their legal and professional responsibilities.
- Each research ethics board has reviewed this study. The research ethics boards are responsible for ensuring that participants are informed of the risks associated with the research, and that participants are free to decide if participation is right for them. If you have any questions regarding your rights as a research participant, you may contact the Research Ethics Board associated with your Data Collection Site:

**Note: Please do not call the Ethics office for rescheduling or cancelling appointment. Please call the CLSA toll-free number (1-866-999-8303).**

## **BRITISH COLUMBIA**

### **BURNABY**

Office of Research Ethics  
Simon Fraser University  
8888 University Drive  
Multi-Tenant Facility  
Burnaby BC V5A 1S6  
Phone: (778) 782-6593  
E-mail: dore@sfu.ca

### **VICTORIA**

Human Research Ethics Office of Research  
Services  
University of Victoria  
Administrative Services Building (ASB), Room  
B202  
PO Box 1700 Stn CSC  
3800 Finnerty Road  
Victoria BC V8W 2Y2  
Phone: (250) 472-4545

### **VANCOUVER**

University of British Columbia  
Office of Research Services  
6190 Agronomy Road  
Vancouver BC V6T 1Z3  
Phone: toll free 1-877-822-8298  
Phone: local (604) 822-8598

Vancouver Island Health Authority  
Research Ethics and Compliance Office  
Queen Alexandra Centre, Main Building Room  
205  
2400 Arbutus Road  
Victoria BC V8N 1V7  
Phone: (250) 519-6726

---

## **ALBERTA**

### **CALGARY**

Conjoint Health Research Ethics Board  
University of Calgary  
Phone: (403) 220-7990

## **MANITOBA**

### **WINNIPEG**

Bannatyne Campus  
Research Ethics Board  
University of Manitoba  
P126 Pathology Building  
770 Bannatyne Avenue  
Winnipeg MB R3E 0W3  
Phone: (204) 789-3883

---

## **ONTARIO**

### **HAMILTON**

Office of the Chair  
Hamilton Integrated Research Ethics Board  
(HiREB)  
293 Wellington Street North  
Hamilton ON L8L 8E7  
Phone: (905) 521-2100 ext. 42013

### **OTTAWA**

Chair, Bruyère Research Ethics Board  
43 Bruyère Street  
Ottawa ON K1N 5C8  
Phone: (613) 562-6262 ext. 4003  
E-mail: REB@bruyere.org



**QUEBEC****MONTREAL**

Ms. Ilde Lepore  
Senior Ethics Administrator  
McGill Institutional Review Board  
McGill University Faculty of Medicine  
McIntyre Medical Building  
#633-3655 Promenade Sir William Osler  
Montreal QC H3G 1Y6  
Phone: (514) 398-8302  
E-mail: ilde.lepore@mcgill.ca

**SHERBROOKE**

CÉR du CIUSSS de l'Estrie-CHUS  
3001, 12e Avenue Nord,  
Sherbrooke, QC J1H 5N4  
819 346-1110, poste 12856  
ethique.recherche.ciusse-  
chus@ssss.gouv.qc.ca

**NOVA SCOTIA****HALIFAX**

Director  
Office of Research Ethics Administration  
Dalhousie University  
6299 South Street  
2nd Floor, Suite 231  
Halifax NS B3H 4H6  
Phone: (902)-494-1462

**NEWFOUNDLAND & LABRADOR****St. JOHN'S**

Memorial University  
Faculty of Medicine  
Health Research Ethics Authority  
2<sup>nd</sup> Floor, Bonaventure Place  
95 Bonaventure Avenue  
St. John's NL, A1B 2X5  
Phone: (709) 777-6974

1 CLSA Memory Study  
 2 Informant Consent Script Version 1.1  
 3 October 12, 2022

Page 1 of 4

4 **Supplementary Appendix 4 - Using the CLSA Platform to Validate Algorithms to Identify Participants**  
 5 **with Dementia (Major Neurocognitive Disorder) and Mild Neurocognitive Disorder in the Canadian**  
 6 **Longitudinal Study on Aging (CLSA Memory Study)**

7 **INFORMANT CONSENT SCRIPT**

8  
 9  
 10 Each section (e.g., INFINT, INFINFO, INFCON, and INFINT) represents a screen of the consent script.

11  
 12  
 13 **INTRODUCTION**

14  
 15 **INFINT1** Your family member or friend, [participant name], is a participant in the Canadian Longitudinal Study on  
 16 Aging (CLSA) and is taking part in the CLSA Memory Study. Participants in this study were asked to  
 17 identify someone who could answer questions about their cognitive health, ability to complete daily tasks,  
 18 and behaviour. [Participant name] selected you as this person and would like you to complete a 20-minute  
 19 telephone interview as part of their participation in the CLSA Memory Study.

20  
 21 Have you received a copy of the information package about this study?

22  
 23 Yes \_\_\_\_\_ **Continue**

24  
 25 No \_\_\_\_\_ **Go to INFINT4**

26  
 27 **INFINT2** Have you had a chance to read the information package?

28  
 29 Yes \_\_\_\_\_ **Continue**

30  
 31 No \_\_\_\_\_ **Go to INFINT6**

32  
 33 **INFINT3** After reading the CLSA Memory Study information package, are you interested in participating in the  
 34 CLSA Memory Study by completing the telephone questionnaire about [participant name]?

35  
 36 Yes \_\_\_\_\_ **Go to INFINFO1**

37  
 38 No \_\_\_\_\_ **Go to REFUSAL**

39  
 40  
 41  
 42 **INFINT4** Would you like us to send you a copy of the information package by mail or by email?

43  
 44 Yes - by mail \_\_\_\_\_ **Continue**

45  
 46 Yes - by email \_\_\_\_\_ **Continue**

47  
 48 No \_\_\_\_\_ **REFUSAL**

49  
 50  
 51 **INFINT5** **[DO NOT READ: Please enter or verify the informant's mailing address and email address then**  
 52 **arrange for the CLSA Memory Study informant information package to be sent by email or mail to**  
 53 **the informant. Let the informant know you will call back in a few days if the information package**  
 54 **was sent by email or a couple of weeks if the information package was sent by mail. Please hit**  
 55 **"back" until you get to the first page of this script to the question asking if the informant has**  
 56 **received the information package.]**

57  
 58 **END INTERVIEW**

CLSA Memory Study  
 Informant Consent Script Version 1.1  
 October 12, 2022

Page 2 of 4

**INFINT6** Would you like for us to call back in a few days when you have had a chance to read the information package?

Yes \_\_\_\_\_ **Continue**

No \_\_\_\_\_ **Go to REFUSAL**

**INFINT7** **[DO NOT READ: Book a call back time for the informant to complete the informed consent process. Please hit "back" until you get to the first page of the informant script asking if the informant has received the information package.]**

Thank you for your interest in the CLSA Memory Study. We look forward to speaking with you again soon to review the information package. **END INTERVIEW.**

---

## INFORMATION

**INFINFO1** As a brief reminder, the purpose of this CLSA Memory Study is to determine whether information that is collected through CLSA interviews can be used to correctly identify individuals who have memory problems and individuals without memory problems.

If you choose to take part, you will complete a 20-minute telephone interview now or at a later date and time convenient to you. This interview will involve answering questions asking about [participant name]'s cognitive health, ability to complete daily tasks, and behaviour.

The CLSA Memory Study is being funded by the Public Health Agency of Canada (PHAC). The CLSA Memory Study is being led by Dr. Lauren Griffith, Dr. Andrew Costa, and Dr. Parminder Raina, all from McMaster University. Other researchers from universities across Canada are also involved.

**Continue**

**INFINFO2** Do you have any questions you would like to ask about the CLSA Memory Study?

**RESPOND TO ALL INFORMANT QUESTIONS BEFORE CONTINUING**

**INFINFO3** Would you like to complete the informed consent process?

Yes \_\_\_\_\_ **Continue**

No \_\_\_\_\_ **Go to Refusal**

---

6 **INFORMANT CONSENT**  
7

8 **INFCON1** Thank you for your time reviewing this information. I will now read a list of statements. Please indicate  
9 you if agree or disagree with each statement.

10  
11 **Continue**

12  
13 **INFCON2** I have read the Family Member or Friend Study Information Package and I understand it.

14  
15 Agree \_\_\_\_\_ **Continue**

16  
17 Disagree \_\_\_\_\_ **Go to Refusal**  
18

19  
20 **INFCON3** I have had a chance to ask questions about the study, and all my questions have been answered.

21  
22 Agree \_\_\_\_\_ **Continue**

23  
24 Disagree \_\_\_\_\_ **Go to Refusal**  
25

26 **INFCON4** I understand that as part of the study, I will be required to complete an interview over the phone  
27 answering a questionnaire about my family member or friend's cognitive health, ability to complete daily  
28 tasks, and behaviour.  
29

30  
31 Agree \_\_\_\_\_ **Continue**

32  
33 Disagree \_\_\_\_\_ **Go to Refusal**  
34

35 **INFCON5** I do not give up any of my legal rights by verbally consenting to participate in the CLSA Memory Study.

36  
37 Agree \_\_\_\_\_ **Continue**

38  
39 Disagree \_\_\_\_\_ **Go to Refusal**  
40

41 **INFCON6** I understand that my information will be used for research purposes only and this research may also  
42 have commercial uses that benefit society.

43  
44 Disagree \_\_\_\_\_ **Go to Refusal**

45  
46 Agree \_\_\_\_\_ **Continue**  
47

48 **INFCON7** I understand that I can withdraw my consent at any time. If I choose to withdraw consent, I will be  
49 offered options for how the information already collected about me will be used.

50  
51 Disagree \_\_\_\_\_ **Go to Refusal**

52  
53 Agree \_\_\_\_\_ **Continue**  
54  
55  
56  
57  
58

CLSA Memory Study  
 Informant Consent Script Version 1.1  
 October 12, 2022

Page 4 of 4

**INFCON8** I will now read the consent statement and ask that you please respond with either 'yes' or 'no'. This will act as your consent to participate in the CLSA Memory Study.

I agree to take part in the CLSA Memory Study.

Yes \_\_\_\_\_ **Go to INFCON9**

No \_\_\_\_\_ **Go to Refusal**

### CONSENTED TO PARTICIPATE

#### IF PARTICIPANT ANSWERS YES TO STATEMENT INFCON8

**INFCON9** Thank you for agreeing to participate in the CLSA Memory Study.

**INFCON10** The questionnaire about [participant name's] cognitive health, ability to complete daily tasks, and behaviour is about 20 minutes long. Would you like to complete the questionnaire now or schedule an appointment at an alternative date or time?

Complete interview now \_\_\_\_\_ **Go to INTERVIEW**

Schedule interview later \_\_\_\_\_ **Continue**

**INFCON11** **[DO NOT READ: Please use Sabretooth to schedule a time to call the informant for their interview.]**

Thank you for agreeing to participate in the CLSA Memory Study. We look forward to speaking with you again soon to complete the questionnaire.

**CLICK SUBMIT AND END CALL**

### REFUSAL

**IF ANSWER IS 'NO' TO INFINT3, INFINT6, INFINFO3, OR IF THE PARTICIPANT RESPONDS "NO" TO INFINT4 OR INFCON8, OR DISAGREES WITH INFCON2, INFCON3, INFCON4, INFCON5, INFCON6, INCON7.**

Thank you for taking the time to learn about the CLSA Memory Study.

**[DO NOT READ: Please contact the participant to identify another informant and update Sabretooth. When you contact the new informant, please hit "previous" to return to the "informant introduction" page.]**

**END CALL**

### INTERVIEW

**DO NOT END CALL. CLICK SUBMIT AND CONTINUE TO INFORMANT INTERVIEW.**

**END CALL**

### CONCLUSION SCREEN

**You have completed the CLSA Memory Study Informant Consent Script. You may now exit this window**

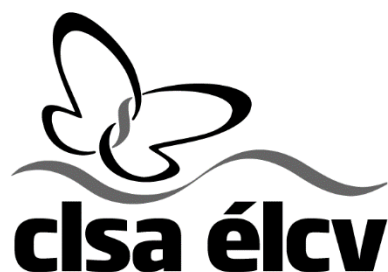

Canadian Longitudinal Study on Aging  
Étude longitudinale canadienne sur le vieillissement

# Supplementary Appendix 5 - Medical Assessment (Canadian Longitudinal Study on Aging (CLSA) Memory Study)

**v1.2, 2022 October 20<sup>th</sup>**

## Table of Contents

|                                                              |    |
|--------------------------------------------------------------|----|
| Sociodemographic Information (SDC) .....                     | 3  |
| Cognitive Status (COG) .....                                 | 8  |
| Medical History (MED) .....                                  | 11 |
| Basic Activities of Daily Living (ADL) .....                 | 19 |
| Instrumental Activities of Daily Living (IADL) .....         | 22 |
| Transportation (TRA) .....                                   | 27 |
| Mood and Behaviour (BHV) .....                               | 29 |
| Physical Examination (EXM).....                              | 32 |
| Montreal Cognitive Assessment (MoCA) .....                   | 42 |
| Preliminary Diagnosis of Neurocognitive Disorder (NCD) ..... | 57 |

peer review only

## Sociodemographic Information (SDC)

|                 |                                                                                                                                                                                                                                                                                                                                                                                                                                                                                                 |
|-----------------|-------------------------------------------------------------------------------------------------------------------------------------------------------------------------------------------------------------------------------------------------------------------------------------------------------------------------------------------------------------------------------------------------------------------------------------------------------------------------------------------------|
| <b>Overview</b> | <p>These questions obtain basic sociodemographic information from the participant. They function as an interview icebreaker and, by comparison with the most recent response for each question from the main CLSA interviews when available, a check on their remote memory.</p> <p>Clinicians are expected to complete all items in this module. However, they have flexibility in determining the order in which the questions are asked and the specific wording used for each question.</p> |
|-----------------|-------------------------------------------------------------------------------------------------------------------------------------------------------------------------------------------------------------------------------------------------------------------------------------------------------------------------------------------------------------------------------------------------------------------------------------------------------------------------------------------------|

|                                                                                                                        |                                                             |
|------------------------------------------------------------------------------------------------------------------------|-------------------------------------------------------------|
| <b>SDC_1</b>                                                                                                           | <b>SDC_AGEBL_MSP</b>                                        |
| Participant's age in years – <u>based on date of birth provided at CLSA Baseline</u>                                   |                                                             |
| CLINICIAN NOTE: If there is no response shown for this item, the participant did not answer this question at baseline. |                                                             |
| NUMBER                                                                                                                 | [CALCULATED BY PINE USING BASELINE CLSA DATA – AGE_DOB_COM] |

|                                                              |                                               |
|--------------------------------------------------------------|-----------------------------------------------|
| <b>SDC_2</b>                                                 | <b>SDC_AGE_MSP</b>                            |
| <b>[ALWAYS ASK]</b>                                          |                                               |
| What is the participant's <b>self-reported</b> age in years? |                                               |
| NB_SP                                                        | Age _____ <b>[MASK: MIN=53, MAX=94]</b>       |
| DK_NA                                                        | 8 <b>[DO NOT READ]</b> Don't know / No answer |
| REFUSED                                                      | 9 <b>[DO NOT READ]</b> Refused                |

|                                                                                                                        |                                                                                               |
|------------------------------------------------------------------------------------------------------------------------|-----------------------------------------------------------------------------------------------|
| <b>SDC_3</b>                                                                                                           | <b>SDC_SEXBL_MSP</b>                                                                          |
| Participant's sex – <u>self-reported at CLSA baseline</u>                                                              |                                                                                               |
| CLINICIAN NOTE: If there is no response shown for this item, the participant did not answer this question at baseline. |                                                                                               |
| GENDER                                                                                                                 | [IMPUTED BY PINE USING BASELINE CLSA DATA – SEX_ASK_COM. IF EMPTY, ANSWER 'DATA UNAVAILABLE'] |



|                                                                 |                       |                                             |
|-----------------------------------------------------------------|-----------------------|---------------------------------------------|
| <b>SDC_4</b>                                                    | <b>SDC_GENDER_MSP</b> |                                             |
| <b>[ALWAYS ASK]</b>                                             |                       |                                             |
| What is the participant's <b>self-reported</b> gender identity? |                       |                                             |
| <b>CODE ONLY ONE RESPONSE</b>                                   |                       |                                             |
| MALE                                                            | 1                     | Male                                        |
| FEMALE                                                          | 2                     | Female                                      |
| TRANSMAN                                                        | 3                     | Transgender Man/Transman                    |
| TRANSWOMAN                                                      | 4                     | Transgender Women/Transwoman                |
| GENDERQUEER                                                     | 5                     | Genderqueer                                 |
| OTSP                                                            | 7                     | Other (please specify: _____)               |
| DK_NA                                                           | 8                     | <b>[DO NOT READ]</b> Don't know / No answer |
| REFUSED                                                         | 9                     | <b>[DO NOT READ]</b> Refused                |

|                                                                                                                        |                                                                                                                                                                                                                                                                                                                                                                                                                                                                                                                                                                                                                                                                                                                                                                                                        |  |
|------------------------------------------------------------------------------------------------------------------------|--------------------------------------------------------------------------------------------------------------------------------------------------------------------------------------------------------------------------------------------------------------------------------------------------------------------------------------------------------------------------------------------------------------------------------------------------------------------------------------------------------------------------------------------------------------------------------------------------------------------------------------------------------------------------------------------------------------------------------------------------------------------------------------------------------|--|
| <b>SDC_5</b>                                                                                                           | <b>SDC_EDU4BL_MSP</b>                                                                                                                                                                                                                                                                                                                                                                                                                                                                                                                                                                                                                                                                                                                                                                                  |  |
| <b>[ALWAYS ASK]</b>                                                                                                    |                                                                                                                                                                                                                                                                                                                                                                                                                                                                                                                                                                                                                                                                                                                                                                                                        |  |
| Participant's education – <u>self-reported at CLSA Baseline</u>                                                        |                                                                                                                                                                                                                                                                                                                                                                                                                                                                                                                                                                                                                                                                                                                                                                                                        |  |
| CLINICIAN NOTE: If there is no response shown for this item, the participant did not answer this question at baseline. |                                                                                                                                                                                                                                                                                                                                                                                                                                                                                                                                                                                                                                                                                                                                                                                                        |  |
| EDU4                                                                                                                   | <p style="text-align: right;">[IMPUTED BY PINE USING BASELINE CLSA DATA]</p> <p><b>1 = Less than secondary school graduation</b> – code if:<br/> ED_ELHS_COM = (1, 2, 3) and<br/> ED_HSGR_COM = 2 and<br/> ED_OTED_COM = 2</p> <p><b>2 = Secondary school graduation, no post-secondary secondary education</b> – code if:<br/> ED_HSGR_COM = 1 and<br/> ED_OTED_COM = 2</p> <p><b>3 = Some post-secondary education</b> – code if:<br/> ED_HIGH_COM = 01</p> <p><b>4 = Post-secondary degree/diploma</b> – code if:<br/> 02 ≤ ED_HIGH_COM ≤ 06 or<br/> ED_HIGH_COM = 97</p> <p><b>9 = At least one required question as not answered</b> – code if:<br/> ED_ELHS_COM = (8,9, EMPTY) or<br/> ED_HSGR_COM = (8,9, EMPTY) or<br/> ED_OTED_COM = (7,8,9, EMPTY) or<br/> ED_HIGH_COM = (98,99, EMPTY)]</p> |  |

1  
2  
3  
4  
5  
6  
7  
8  
9  
10  
11  
12  
13  
14  
15  
16  
17  
18  
19  
20  
21  
22  
23  
24  
25  
26

|                                                                            |                    |                                                          |
|----------------------------------------------------------------------------|--------------------|----------------------------------------------------------|
| <b>SDC_6</b>                                                               | <b>SDC_EDU_MSP</b> |                                                          |
| <b>[ALWAYS ASK]</b>                                                        |                    |                                                          |
| What is the participant's <b>self-reported</b> highest level of education? |                    |                                                          |
| <b>CODE ONLY ONE RESPONSE</b>                                              |                    |                                                          |
| LESS_SEC                                                                   | 1                  | Less than secondary school graduation                    |
| SEC                                                                        | 2                  | Secondary school graduation, no post-secondary education |
| SOME_POST                                                                  | 3                  | Some post-secondary education                            |
| POST_SEC                                                                   | 4                  | Post-secondary degree/diploma                            |
| DK_NA                                                                      | 8                  | <b>[DO NOT READ]</b> Don't know / No answer              |
| REFUSED                                                                    | 9                  | <b>[DO NOT READ]</b> Refused                             |

27  
28  
29  
30  
31  
32  
33  
34  
35  
36  
37  
38  
39  
40  
41  
42  
43  
44  
45  
46  
47  
48  
49  
50  
51  
52  
53  
54  
55  
56  
57  
58  
59  
60

|                                                                   |                    |                                             |
|-------------------------------------------------------------------|--------------------|---------------------------------------------|
| <b>SDC_7</b>                                                      | <b>SDC_LBF_MSP</b> |                                             |
| <b>[ALWAYS ASK]</b>                                               |                    |                                             |
| What is the participant's <b>self-reported</b> employment status? |                    |                                             |
| <b>CODE ONLY ONE RESPONSE</b>                                     |                    |                                             |
| COM_RET                                                           | 1                  | Completely retired                          |
| PAR_RET                                                           | 2                  | Partly retired                              |
| NOT_RET_WORK                                                      | 3                  | Not retired and currently working           |
| NOT_RET_NO_WORK                                                   | 4                  | Not retired and not currently working       |
| NEVER_WORKED                                                      | 5                  | Never held a paid job                       |
| DK_NA                                                             | 8                  | <b>[DO NOT READ]</b> Don't know / No answer |
| REFUSED                                                           | 9                  | <b>[DO NOT READ]</b> Refused                |

|                                                                                                                                                                        |                                                                                                                                                                                                                                                                                                                                                                                                                                                                                                                                                                                                                                                                                                                                                                                                                 |
|------------------------------------------------------------------------------------------------------------------------------------------------------------------------|-----------------------------------------------------------------------------------------------------------------------------------------------------------------------------------------------------------------------------------------------------------------------------------------------------------------------------------------------------------------------------------------------------------------------------------------------------------------------------------------------------------------------------------------------------------------------------------------------------------------------------------------------------------------------------------------------------------------------------------------------------------------------------------------------------------------|
| SDC_8                                                                                                                                                                  | SDC_OCCBL_MSP                                                                                                                                                                                                                                                                                                                                                                                                                                                                                                                                                                                                                                                                                                                                                                                                   |
| <b>[ASK IF SDC_LBF_MSP ≠ NEVER_WORKED]</b>                                                                                                                             |                                                                                                                                                                                                                                                                                                                                                                                                                                                                                                                                                                                                                                                                                                                                                                                                                 |
| Type of job participant did for the longest period of time – <u>self-reported at CLSA Baseline</u>                                                                     |                                                                                                                                                                                                                                                                                                                                                                                                                                                                                                                                                                                                                                                                                                                                                                                                                 |
| <b>CLINICIAN NOTE:</b> Please note that this is not the “main occupation” of the participant. Rather it is the job at which the participant had worked at the longest. |                                                                                                                                                                                                                                                                                                                                                                                                                                                                                                                                                                                                                                                                                                                                                                                                                 |
| If there is no response shown for this item, the participant did not answer this question at baseline.                                                                 |                                                                                                                                                                                                                                                                                                                                                                                                                                                                                                                                                                                                                                                                                                                                                                                                                 |
| OCC_TYPE                                                                                                                                                               | <p style="text-align: right;">[IMPUTED BY PINE USING BASELINE]</p> <p>CLSA DATA</p> <p><b>Never worked</b> – code if:<br/>LBF_EVER_COM = “NO”</p> <p><b>[open text for LFP_TYPE_SP_COM]</b> – code if:<br/>(RET_RTRD_COM = 1 or<br/>RET_RTRD_COM = 2) and<br/>LFP_LNGST_COM = 1</p> <p><b>[open text for LFP_LGTYPE_SP_COM]</b> – code if:<br/>(RET_RTRD_COM = 1 or<br/>RET_RTRD_COM = 2) and<br/>LFP_LNGST_COM = 2</p> <p><b>[open text for LBF_TYPE_NB_COM]</b> – code if:<br/>RET_RTRD_COM = 3 and<br/>LBF_LGEVER_COM = 2</p> <p><b>[open text for LBF_LGTYPE_SP_COM]</b> – code if:<br/>RET_RTRD_COM = 3 and<br/>LBF_LGEVER_COM = 1</p> <p><b>Data unavailable</b> – code if:<br/>ALL required questions do not fit into categories above, or ALL are DK_NA<br/>or REFUSED or not answered/missing data</p> |

|                                                                                  |             |
|----------------------------------------------------------------------------------|-------------|
| SDC_9                                                                            | SDC_OCC_MSP |
| <b>[ASK IF SDC_LBF_MSP = COM_RET, PAR_RET, NOT_RET_WORK, or NOT_RET_NO_WORK]</b> |             |
| What is the participant’s <b>self-reported</b> primary occupation?               |             |

**CLINICIAN NOTE:** Provide a brief description of the occupation. Please note, this question refers to the primary occupation of the participant while the previous question from the main CLSA interview refers to the occupation that the participant did for the longest period of time.

|         |            |                                             |
|---------|------------|---------------------------------------------|
| OCC_SP  | Occupation | _____                                       |
| DK_NA   | 8          | <b>[DO NOT READ]</b> Don't know / No answer |
| REFUSED | 9          | <b>[DO NOT READ]</b> Refused                |

|                                                                                                                                                                                                                          |                      |     |
|--------------------------------------------------------------------------------------------------------------------------------------------------------------------------------------------------------------------------|----------------------|-----|
| <b>SDC_10</b>                                                                                                                                                                                                            | <b>SDC_NOTES_MSP</b> |     |
| <b>[ALWAYS ASK]</b>                                                                                                                                                                                                      |                      |     |
| Do you have any additional notes to include for this module? For example, are there any other sociodemographic characteristics that should be taken into account when interpreting the results of the cognitive testing? |                      |     |
| YES                                                                                                                                                                                                                      | 1                    | Yes |
| NO                                                                                                                                                                                                                       | 2                    | No  |

|                                                                                                                                     |                        |  |
|-------------------------------------------------------------------------------------------------------------------------------------|------------------------|--|
| <b>SDC_11</b>                                                                                                                       | <b>SDC_NOTESSP_MSP</b> |  |
| <b>[ASK IF SDC_NOTES_MSP = YES]</b>                                                                                                 |                        |  |
| <b>CLINICIAN NOTE:</b> Please do not enter any identifying information in this section.                                             |                        |  |
| Please provide any relevant notes (e.g., how congruent the participant's responses were to previously collected information) below: |                        |  |

**SDC\_END**

## Cognitive Status (COG)

|                 |                                                                                                                                                                                                                                                                                                                                                                                                                                                                                                   |
|-----------------|---------------------------------------------------------------------------------------------------------------------------------------------------------------------------------------------------------------------------------------------------------------------------------------------------------------------------------------------------------------------------------------------------------------------------------------------------------------------------------------------------|
| <b>Overview</b> | <p>The purpose of this section is to assess if the participant has experienced cognitive decline. Participants that report the presence of cognitive decline will be asked to provide details regarding the onset, progression, and symptoms related to the cognitive decline.</p> <p>Clinicians are expected to complete all items in this module. However, they have flexibility in determining the order in which the questions are asked and the specific wording used for each question.</p> |
|-----------------|---------------------------------------------------------------------------------------------------------------------------------------------------------------------------------------------------------------------------------------------------------------------------------------------------------------------------------------------------------------------------------------------------------------------------------------------------------------------------------------------------|

|                                                                                   |                    |                                             |
|-----------------------------------------------------------------------------------|--------------------|---------------------------------------------|
| <b>COG_1</b>                                                                      | <b>COG_DEC_MSP</b> |                                             |
| <b>[ALWAYS ASK]</b>                                                               |                    |                                             |
| Has the participant reported experiencing cognitive decline?                      |                    |                                             |
| <b>CLINICIAN NOTE:</b> This question should be asked directly to the participant. |                    |                                             |
| YES                                                                               | 1                  | Yes                                         |
| NO                                                                                | 2                  | No                                          |
| DK_NA                                                                             | 8                  | <b>[DO NOT READ]</b> Don't know / No answer |
| REFUSED                                                                           | 9                  | <b>[DO NOT READ]</b> Refused                |

|                                                                                                                       |                    |                                                 |
|-----------------------------------------------------------------------------------------------------------------------|--------------------|-------------------------------------------------|
| <b>COG_2</b>                                                                                                          | <b>COG_YRS_MSP</b> |                                                 |
| <b>[ASK IF COG_DEC_MSP = YES]</b>                                                                                     |                    |                                                 |
| How many years has the participant reported experiencing cognitive decline?                                           |                    |                                                 |
| <b>CLINICIAN NOTE:</b> This question should be asked directly to the participant. Please provide the number of years. |                    |                                                 |
| LESS_YR                                                                                                               | 001                | Less than one year                              |
| YEARS                                                                                                                 | Years              | ___ <b>[MASK: MIN=1, MAX=PARTICIPANT'S AGE]</b> |
| DK_NA                                                                                                                 | 998                | <b>[DO NOT READ]</b> Don't know / No answer     |
| REFUSED                                                                                                               | 999                | <b>[DO NOT READ]</b> Refused                    |

|              |                    |  |
|--------------|--------------------|--|
| <b>COG_3</b> | <b>COG_SEV_MSP</b> |  |
|--------------|--------------------|--|

**[ASK IF COG\_DEC\_MSP = YES]**

The participant describes the severity of their cognitive decline as...

**CODE ONLY ONE RESPONSE**

**CLINICIAN NOTE:** This question should be asked directly to the participant.

|         |   |                                                                          |
|---------|---|--------------------------------------------------------------------------|
| IRRT    | 1 | Present and may be an irritant but not a concern of theirs               |
| WORR    | 2 | Worrisome but not having overt impact on daily life                      |
| IMPT    | 3 | Having an impact on their life (e.g., occupation, autonomy/independence) |
| DK_NA   | 8 | <b>[DO NOT READ]</b> Don't know / No answer                              |
| REFUSED | 9 | <b>[DO NOT READ]</b> Refused                                             |

**COG\_4**      **COG\_ONS\_MSP****[ASK IF COG\_DEC\_MSP = YES]**

The participant believes the onset of their cognitive decline was...

**CODE ONLY ONE RESPONSE**

|         |   |                                             |
|---------|---|---------------------------------------------|
| GRAD    | 1 | Gradual                                     |
| ABRT    | 2 | Abrupt                                      |
| DK_NA   | 8 | <b>[DO NOT READ]</b> Don't know / No answer |
| REFUSED | 9 | <b>[DO NOT READ]</b> Refused                |

**COG\_5**      **COG\_VAS\_MSP****[ASK IF COG\_ONS\_MSP = ABRT]**

The participant believes their cognitive decline was related to a cerebrovascular event.

|         |   |                                             |
|---------|---|---------------------------------------------|
| YES     | 1 | Yes                                         |
| NO      | 2 | No                                          |
| DK_NA   | 8 | <b>[DO NOT READ]</b> Don't know / No answer |
| REFUSED | 9 | <b>[DO NOT READ]</b> Refused                |

**COG\_6**      **COG\_PRO\_MSP****[ASK IF COG\_DEC\_MSP = YES]**

|                                                                              |   |                                        |
|------------------------------------------------------------------------------|---|----------------------------------------|
| The participant believes the trajectory of their cognitive impairment was... |   |                                        |
| <b>CODE ONLY ONE RESPONSE</b>                                                |   |                                        |
| NONE                                                                         | 1 | Improvement/none-stability after onset |
| GRAD                                                                         | 2 | Gradual or insidious progression       |
| STEP                                                                         | 3 | Stepwise progression                   |
| FLUC                                                                         | 4 | Fluctuating                            |
| DK_NA                                                                        | 8 | [DO NOT READ] Don't know / No answer   |
| REFUSED                                                                      | 9 | [DO NOT READ] Refused                  |

|                                                                                                                                                                                                   |                      |     |
|---------------------------------------------------------------------------------------------------------------------------------------------------------------------------------------------------|----------------------|-----|
| <b>COG_7</b>                                                                                                                                                                                      | <b>COG_NOTES_MSP</b> |     |
| <b>[ALWAYS ASK]</b>                                                                                                                                                                               |                      |     |
| Do you have any additional notes to include for this module (e.g., whether you concur with the participant's perceptions of presence, severity, onset, and progression of any cognitive decline)? |                      |     |
| YES                                                                                                                                                                                               | 1                    | Yes |
| NO                                                                                                                                                                                                | 2                    | No  |

|                                                                                         |                        |  |
|-----------------------------------------------------------------------------------------|------------------------|--|
| <b>COG_8</b>                                                                            | <b>COG_NOTESSP_MSP</b> |  |
| <b>[ASK IF COG_NOTES_MSP = YES]</b>                                                     |                        |  |
| <b>CLINICIAN NOTE:</b> Please do not enter any identifying information in this section. |                        |  |
| Please provide any notes below:                                                         |                        |  |

**COG\_END**

## Medical History (MED)

---

|                 |                                                                                                                                                                                                                                                                                                                                                                                                                                                                                                                                                                                                           |
|-----------------|-----------------------------------------------------------------------------------------------------------------------------------------------------------------------------------------------------------------------------------------------------------------------------------------------------------------------------------------------------------------------------------------------------------------------------------------------------------------------------------------------------------------------------------------------------------------------------------------------------------|
| <b>Overview</b> | <p>The medical history module captures information that will assist the examining physician in determining if any observed cognitive limitations are secondary to medical conditions such as neurodegenerative diseases. This information may also increase the confidence in the physician's diagnosis based on the absence or presence of risk factors for neurocognitive disorders.</p> <p>Clinicians are expected to complete all items in this module. However, they have flexibility in determining the order in which the questions are asked and the specific wording used for each question.</p> |
|-----------------|-----------------------------------------------------------------------------------------------------------------------------------------------------------------------------------------------------------------------------------------------------------------------------------------------------------------------------------------------------------------------------------------------------------------------------------------------------------------------------------------------------------------------------------------------------------------------------------------------------------|



| MED_1                                                                                        | MED_CON_MSP |                                                                                                     |
|----------------------------------------------------------------------------------------------|-------------|-----------------------------------------------------------------------------------------------------|
| <b>[ALWAYS ASK]</b>                                                                          |             |                                                                                                     |
| Does the participant have any of the following medical conditions?                           |             |                                                                                                     |
| <b>MULTIPLE RESPONSES ALLOWED (EXCEPT IF 96, 98 OR 99 ARE SELECTED), CODE ALL THAT APPLY</b> |             |                                                                                                     |
| CAD                                                                                          | 1           | Coronary artery disease                                                                             |
| HF                                                                                           | 2           | Heart failure                                                                                       |
| AF                                                                                           | 3           | Atrial fibrillation/flutter                                                                         |
| TIA                                                                                          | 4           | Transient ischemic attack (TIA)                                                                     |
| STR                                                                                          | 5           | Cerebrovascular accident (stroke)                                                                   |
| HEM                                                                                          | 6           | Intracerebral hemorrhage                                                                            |
| HYP                                                                                          | 7           | Hypertension                                                                                        |
| DIA                                                                                          | 8           | Diabetes mellitus                                                                                   |
| DYS                                                                                          | 9           | Dyslipidemia                                                                                        |
| PKD                                                                                          | 10          | Parkinson's Disease or Parkinsonism                                                                 |
| DEP                                                                                          | 11          | Depression                                                                                          |
| ANX                                                                                          | 12          | Anxiety disorder                                                                                    |
| PSY                                                                                          | 13          | Psychotic illness                                                                                   |
| HR                                                                                           | 14          | Hearing impairment                                                                                  |
| VS                                                                                           | 15          | Visual impairment                                                                                   |
| SM                                                                                           | 16          | Impaired sense of smell                                                                             |
| DEM                                                                                          | 17          | Dementia                                                                                            |
| DELI                                                                                         | 18          | Suspected delirium (in the past 5 years)                                                            |
| IN                                                                                           | 19          | Insomnia                                                                                            |
| REM                                                                                          | 20          | REM-Sleep Behaviour Disorder                                                                        |
| OSA                                                                                          | 21          | Obstructive Sleep Apnea                                                                             |
| HYPT                                                                                         | 22          | Hypothyroidism                                                                                      |
| B12                                                                                          | 23          | Vitamin B12 deficiency                                                                              |
| OTSP                                                                                         | 24          | Other conditions relevant to cognitive status (e.g. cancer and/or cancer treatments); specify _____ |
| NONE                                                                                         | 96          | None of the above                                                                                   |
| DK_NA                                                                                        | 98          | <b>[DO NOT READ]</b> Don't know / No answer                                                         |
| REFUSED                                                                                      | 99          | <b>[DO NOT READ]</b> Refused                                                                        |

|                                                                         |                    |                                             |
|-------------------------------------------------------------------------|--------------------|---------------------------------------------|
| <b>MED_2</b>                                                            | <b>MED_TBI_MSP</b> |                                             |
| <b>[ALWAYS ASK]</b>                                                     |                    |                                             |
| Has the participant suffered a head injury or a concussion in the past? |                    |                                             |
| YES                                                                     | 1                  | Yes                                         |
| NO                                                                      | 2                  | No                                          |
| DK_NA                                                                   | 8                  | <b>[DO NOT READ]</b> Don't know / No answer |
| REFUSED                                                                 | 9                  | <b>[DO NOT READ]</b> Refused                |

|                                                                                                             |                     |                                             |
|-------------------------------------------------------------------------------------------------------------|---------------------|---------------------------------------------|
| <b>MED_3</b>                                                                                                | <b>MED_TBI1_MSP</b> |                                             |
| <b>[ASK IF MED_TBI_MSP = YES]</b>                                                                           |                     |                                             |
| How many head injuries or concussions has the participant had in his/her lifetime?                          |                     |                                             |
| <b>CLINICIAN NOTES:</b> If the informant cannot remember exact number, please probe for their best estimate |                     |                                             |
| TBI_NUM                                                                                                     | Number              | _____ <b>[MASK: MIN=1]</b>                  |
| DK_NA                                                                                                       | 8                   | <b>[DO NOT READ]</b> Don't know / No answer |
| REFUSED                                                                                                     | 9                   | <b>[DO NOT READ]</b> Refused                |

|                                                                                                                                                      |                     |                                                       |
|------------------------------------------------------------------------------------------------------------------------------------------------------|---------------------|-------------------------------------------------------|
| <b>MED_4</b>                                                                                                                                         | <b>MED_TBI2_MSP</b> |                                                       |
| <b>[ASK IF MED_TBI_MSP = YES]</b>                                                                                                                    |                     |                                                       |
| At what age or in what year did the participant have the most serious head injury?                                                                   |                     |                                                       |
| <b>CLINICIAN NOTES:</b> If the informant cannot remember the specific year, please probe for their best estimation of when the head injury occurred. |                     |                                                       |
| YR_SP                                                                                                                                                | Year                | _____ <b>[MASK: MIN=BIRTH YEAR, MAX=CURRENT YEAR]</b> |
| NB_SP                                                                                                                                                | Age                 | _____ <b>[MASK: MIN=1, MAX=CURRENT AGE]</b>           |
| DK_NA                                                                                                                                                | 998                 | <b>[DO NOT READ]</b> Don't know / No answer           |
| REFUSED                                                                                                                                              | 999                 | <b>[DO NOT READ]</b> Refused                          |

|                                                                                                     |   |                                                |  |
|-----------------------------------------------------------------------------------------------------|---|------------------------------------------------|--|
| <b>MED_5</b>                                                                                        |   | <b>MED_TBI3_MSP</b>                            |  |
| <b>[ASK IF MED_TBI_MSP = YES]</b>                                                                   |   |                                                |  |
| Did the most serious head injury result in...?                                                      |   |                                                |  |
| <b>READ LIST, MULTIPLE RESPONSES ALLOWED (EXCEP IF 6, 8 OR 9 ARE SELECTED), CODE ALL THAT APPLY</b> |   |                                                |  |
| DZ                                                                                                  | 1 | Being dazed, confused, or "seeing stars"       |  |
| DRM                                                                                                 | 2 | Not remembering the injury                     |  |
| KO                                                                                                  | 3 | Losing consciousness (knocked out)             |  |
| NONE                                                                                                | 6 | Head injury did not result in any of the above |  |
| DK_NA                                                                                               | 8 | <b>[DO NOT READ]</b> Don't know / No answer    |  |
| REFUSED                                                                                             | 9 | <b>[DO NOT READ]</b> Refused                   |  |

|                                          |   |                                             |  |
|------------------------------------------|---|---------------------------------------------|--|
| <b>MED_6</b>                             |   | <b>MED_TBI4_MSP</b>                         |  |
| <b>[ASK IF MED_TBI3_MSP = KO]</b>        |   |                                             |  |
| How long did you lose consciousness for? |   |                                             |  |
| <b>READ LIST, CODE ONLY ONE RESPONSE</b> |   |                                             |  |
| KO1                                      | 1 | Less than a minute                          |  |
| KO20                                     | 2 | 1-20 minutes                                |  |
| KO20MORE                                 | 3 | Longer than 20 minutes                      |  |
| DK_NA                                    | 8 | <b>[DO NOT READ]</b> Don't know / No answer |  |
| REFUSED                                  | 9 | <b>[DO NOT READ]</b> Refused                |  |

|                                                                                                                                                                                                                                                                                                                                                                                                                                                                                                                                                                                                                                                                                                                                                                                                                                                                                                                                                                                                                                                                                                                                                                                                                                                                                                                                                                              |              |                                                                                                         |
|------------------------------------------------------------------------------------------------------------------------------------------------------------------------------------------------------------------------------------------------------------------------------------------------------------------------------------------------------------------------------------------------------------------------------------------------------------------------------------------------------------------------------------------------------------------------------------------------------------------------------------------------------------------------------------------------------------------------------------------------------------------------------------------------------------------------------------------------------------------------------------------------------------------------------------------------------------------------------------------------------------------------------------------------------------------------------------------------------------------------------------------------------------------------------------------------------------------------------------------------------------------------------------------------------------------------------------------------------------------------------|--------------|---------------------------------------------------------------------------------------------------------|
| MED_7                                                                                                                                                                                                                                                                                                                                                                                                                                                                                                                                                                                                                                                                                                                                                                                                                                                                                                                                                                                                                                                                                                                                                                                                                                                                                                                                                                        | MED_MED2_MSP |                                                                                                         |
| <b>[ALWAYS ASK]</b>                                                                                                                                                                                                                                                                                                                                                                                                                                                                                                                                                                                                                                                                                                                                                                                                                                                                                                                                                                                                                                                                                                                                                                                                                                                                                                                                                          |              |                                                                                                         |
| Which of the following medications is the participant currently taking?                                                                                                                                                                                                                                                                                                                                                                                                                                                                                                                                                                                                                                                                                                                                                                                                                                                                                                                                                                                                                                                                                                                                                                                                                                                                                                      |              |                                                                                                         |
| <b>MULTIPLE RESPONSES ALLOWED (EXCEPT IF 96, 98 OR 99 ARE SELECTED), CODE ALL THAT APPLY</b>                                                                                                                                                                                                                                                                                                                                                                                                                                                                                                                                                                                                                                                                                                                                                                                                                                                                                                                                                                                                                                                                                                                                                                                                                                                                                 |              |                                                                                                         |
| <p><b>CLINICIAN NOTES:</b> If the participant does not bring in a list of medications or the medications themselves for review, please select option “Don’t know / No answer”. If you feel that the medication is an essential data element, you can ask if you can call the participant after the assessment when they are home and have access to their medications. Alternatively, you may also ask the participant if he/she would like you to contact the informant about which medications are being used.</p> <p>To determine if a medication has moderate to high anticholinergic activity, please refer to: <a href="https://www.rxfiles.ca/rxfiles/uploads/documents/Psyc-anticholinergic-Ref%20List%20SPDP-complete.pdf">https://www.rxfiles.ca/rxfiles/uploads/documents/Psyc-anticholinergic-Ref%20List%20SPDP-complete.pdf</a></p> <p>If the participant is taking a medication with moderate/high anticholinergic activity that also falls under another listed category, please select both options. For example, if a participant is taking desipramine for the treatment of depression, select the options “anti-depressants” and “drugs with moderate/high anticholinergic activity”.</p> <p>If the participant is not taking a medication regularly but rather as required, please include details in the “Notes” section at the end of this module.</p> |              |                                                                                                         |
| DEP                                                                                                                                                                                                                                                                                                                                                                                                                                                                                                                                                                                                                                                                                                                                                                                                                                                                                                                                                                                                                                                                                                                                                                                                                                                                                                                                                                          | 01           | Anti-depressants (whether used for depression, anxiety or other reason)                                 |
| PSY                                                                                                                                                                                                                                                                                                                                                                                                                                                                                                                                                                                                                                                                                                                                                                                                                                                                                                                                                                                                                                                                                                                                                                                                                                                                                                                                                                          | 02           | Anti-psychotics                                                                                         |
| SED                                                                                                                                                                                                                                                                                                                                                                                                                                                                                                                                                                                                                                                                                                                                                                                                                                                                                                                                                                                                                                                                                                                                                                                                                                                                                                                                                                          | 03           | Hypnotics and sedatives (whether used for insomnia, anxiety or other reason)                            |
| CHL                                                                                                                                                                                                                                                                                                                                                                                                                                                                                                                                                                                                                                                                                                                                                                                                                                                                                                                                                                                                                                                                                                                                                                                                                                                                                                                                                                          | 04           | Drugs with moderate/high anticholinergic activity including prescribed and over the counter medications |
| CON                                                                                                                                                                                                                                                                                                                                                                                                                                                                                                                                                                                                                                                                                                                                                                                                                                                                                                                                                                                                                                                                                                                                                                                                                                                                                                                                                                          | 05           | Anticonvulsants                                                                                         |
| PKD                                                                                                                                                                                                                                                                                                                                                                                                                                                                                                                                                                                                                                                                                                                                                                                                                                                                                                                                                                                                                                                                                                                                                                                                                                                                                                                                                                          | 06           | Antiparkinsonian                                                                                        |
| OPI                                                                                                                                                                                                                                                                                                                                                                                                                                                                                                                                                                                                                                                                                                                                                                                                                                                                                                                                                                                                                                                                                                                                                                                                                                                                                                                                                                          | 07           | Opioids                                                                                                 |
| COG                                                                                                                                                                                                                                                                                                                                                                                                                                                                                                                                                                                                                                                                                                                                                                                                                                                                                                                                                                                                                                                                                                                                                                                                                                                                                                                                                                          | 08           | Cognitive enhancers (cholinesterase inhibitor, memantine)                                               |
| OT                                                                                                                                                                                                                                                                                                                                                                                                                                                                                                                                                                                                                                                                                                                                                                                                                                                                                                                                                                                                                                                                                                                                                                                                                                                                                                                                                                           | 09           | Other medication that you think may affect cognition: Specify: _____                                    |
| NONE_                                                                                                                                                                                                                                                                                                                                                                                                                                                                                                                                                                                                                                                                                                                                                                                                                                                                                                                                                                                                                                                                                                                                                                                                                                                                                                                                                                        | 96           | None of the above                                                                                       |
| DK_NA                                                                                                                                                                                                                                                                                                                                                                                                                                                                                                                                                                                                                                                                                                                                                                                                                                                                                                                                                                                                                                                                                                                                                                                                                                                                                                                                                                        | 98           | <b>[DO NOT READ]</b> Don’t know / No answer                                                             |
| REFUSED                                                                                                                                                                                                                                                                                                                                                                                                                                                                                                                                                                                                                                                                                                                                                                                                                                                                                                                                                                                                                                                                                                                                                                                                                                                                                                                                                                      | 99           | <b>[DO NOT READ]</b> Refused                                                                            |

|                                              |                   |
|----------------------------------------------|-------------------|
| MED_8                                        | MED_SMKSTATUS_MSP |
| <b>[ALWAYS ASK]</b>                          |                   |
| What is the participant’s smoking status...? |                   |
| <b>READ LIST, CODE ONLY ONE RESPONSE</b>     |                   |

|          |   |                                                   |
|----------|---|---------------------------------------------------|
| YES      | 1 | Yes, he/she currently smokes                      |
| NEVER    | 2 | No, he/she does not currently smoke and never has |
| FORM_DAY | 4 | Former daily smoker (non-smoker now)              |
| FORM_OCC | 5 | Former occasional smoker (non-smoker now)         |
| DK_NA    | 8 | <b>[DO NOT READ]</b> Don't know / No answer       |
| REFUSED  | 9 | <b>[DO NOT READ]</b> Refused                      |

|                                                 |                    |                                                              |
|-------------------------------------------------|--------------------|--------------------------------------------------------------|
| <b>MED_9</b>                                    | <b>MED_CAN_MSP</b> |                                                              |
| <b>[ALWAYS ASK]</b>                             |                    |                                                              |
| Does the participant use any cannabis products? |                    |                                                              |
| <b>CODE ONLY ONE RESPONSE</b>                   |                    |                                                              |
| YES                                             | 1                  | Yes, he/she currently uses cannabis products                 |
| NEVER                                           | 2                  | No, he/she does not and has never used cannabis products     |
| FORMER                                          | 3                  | Former cannabis user, but does not use cannabis products now |
| DK_NA                                           | 8                  | <b>[DO NOT READ]</b> Don't know / No answer                  |
| REFUSED                                         | 9                  | <b>[DO NOT READ]</b> Refused                                 |

|                                            |                    |                                                    |
|--------------------------------------------|--------------------|----------------------------------------------------|
| <b>MED_10</b>                              | <b>MED_ALC_MSP</b> |                                                    |
| <b>[ALWAYS ASK]</b>                        |                    |                                                    |
| What is the participant's drinking status? |                    |                                                    |
| <b>CODE ONLY ONE RESPONSE</b>              |                    |                                                    |
| NEVER                                      | 1                  | Never drank alcohol                                |
| FORMER                                     | 2                  | Used to drink alcohol but does not currently drink |
| CURRENT                                    | 3                  | Currently consumes alcohol                         |
| DK_NA                                      | 8                  | <b>[DO NOT READ]</b> Don't know / No answer        |
| REFUSED                                    | 9                  | <b>[DO NOT READ]</b> Refused                       |

|                                                                                                                                                                                                                                             |                       |                                             |
|---------------------------------------------------------------------------------------------------------------------------------------------------------------------------------------------------------------------------------------------|-----------------------|---------------------------------------------|
| <b>MED_11</b>                                                                                                                                                                                                                               | <b>MED_ALCNMB_MSP</b> |                                             |
| <b>[ASK IF MED_ALC_MSP = CURRENT]</b>                                                                                                                                                                                                       |                       |                                             |
| A "standard" drink is considered 12 ounces of regular beer (~5% alcohol), 5 ounces of wine (~12% alcohol), or 1.5 ounces of distilled spirits (~40% alcohol). How many estimated standardized drinks per week does the participant consume? |                       |                                             |
| ALC_NB                                                                                                                                                                                                                                      | Number                | _____ <b>[MASK: MIN=0, MAX=200]</b>         |
| DK_NA                                                                                                                                                                                                                                       | 8                     | <b>[DO NOT READ]</b> Don't know / No answer |
| REFUSED                                                                                                                                                                                                                                     | 9                     | <b>[DO NOT READ]</b> Refused                |

|                                                                                                        |                        |                                             |
|--------------------------------------------------------------------------------------------------------|------------------------|---------------------------------------------|
| <b>MED_12</b>                                                                                          | <b>MED_ALCMLFQ_MSP</b> |                                             |
| <b>[ASK IF MED_ALC_MSP = CURRENT AND SDC_SEXBL_MSP = MALE]</b>                                         |                        |                                             |
| In the past 12 months, has the participant consumed 5 or more drinks in 2 hours at least once a month? |                        |                                             |
| YES                                                                                                    | 1                      | Yes                                         |
| NO                                                                                                     | 2                      | No                                          |
| DK_NA                                                                                                  | 8                      | <b>[DO NOT READ]</b> Don't know / No answer |
| REFUSED                                                                                                | 9                      | <b>[DO NOT READ]</b> Refused                |

|                                                                                                        |                        |                                             |
|--------------------------------------------------------------------------------------------------------|------------------------|---------------------------------------------|
| <b>MED_13</b>                                                                                          | <b>MED_ALCFMFQ_MSP</b> |                                             |
| <b>[ASK IF MED_ALC_MSP = CURRENT AND SDC_SEXBL_MSP = FEMALE]</b>                                       |                        |                                             |
| In the past 12 months, has the participant consumed 4 or more drinks in 2 hours at least once a month? |                        |                                             |
| YES                                                                                                    | 1                      | Yes                                         |
| NO                                                                                                     | 2                      | No                                          |
| DK_NA                                                                                                  | 8                      | <b>[DO NOT READ]</b> Don't know / No answer |
| REFUSED                                                                                                | 9                      | <b>[DO NOT READ]</b> Refused                |

|                                                                                                                |                    |                                             |
|----------------------------------------------------------------------------------------------------------------|--------------------|---------------------------------------------|
| <b>MED_14</b>                                                                                                  | <b>MED_FAM_MSP</b> |                                             |
| <b>[ALWAYS ASK]</b>                                                                                            |                    |                                             |
| Does the participant have a first degree relative who has been diagnosed with dementia or Alzheimer's Disease? |                    |                                             |
| <b>CLINICIAN NOTE:</b> First degree relatives include biological parents, siblings, or children                |                    |                                             |
| YES                                                                                                            | 1                  | Yes                                         |
| NO                                                                                                             | 2                  | No                                          |
| DK_NA                                                                                                          | 8                  | <b>[DO NOT READ]</b> Don't know / No answer |
| REFUSED                                                                                                        | 9                  | <b>[DO NOT READ]</b> Refused                |

|                     |                      |  |
|---------------------|----------------------|--|
| <b>MED_15</b>       | <b>MED_NOTES_MSP</b> |  |
| <b>[ALWAYS ASK]</b> |                      |  |

1  
2  
3  
4  
5  
6  
7  
8  
9  
10  
11  
12  
13  
14  
15  
16  
17  
18  
19  
20  
21  
22  
23  
24  
25  
26  
27  
28  
29  
30  
31  
32  
33  
34  
35  
36  
37  
38  
39  
40  
41  
42  
43  
44  
45  
46  
47  
48  
49  
50  
51  
52  
53  
54  
55  
56  
57  
58  
59  
60

|                                                                                                                                                                                                                                                                                       |   |     |
|---------------------------------------------------------------------------------------------------------------------------------------------------------------------------------------------------------------------------------------------------------------------------------------|---|-----|
| Do you have any additional notes to include for this module? For example, are there any other details regarding the participant's medical history that should be taken into account when interpreting the results of the cognitive testing such as the use of non-prescription drugs? |   |     |
| YES                                                                                                                                                                                                                                                                                   | 1 | Yes |
| NO                                                                                                                                                                                                                                                                                    | 2 | No  |

|                                                                                         |                        |
|-----------------------------------------------------------------------------------------|------------------------|
| <b>MED_16</b>                                                                           | <b>MED_NOTESSP_MSP</b> |
| <b>[ASK IF MED_NOTES_MSP = YES]</b>                                                     |                        |
| <b>CLINICIAN NOTE:</b> Please do not enter any identifying information in this section. |                        |
| Please provide any notes below:                                                         |                        |

**MED\_END**

For peer review only

## Basic Activities of Daily Living (ADL)

This module contains a subset of the Activities of Daily Living questions of the OARS Multidimensional Assessment Questionnaire© developed by Dr. Gerda G. Fillenbaum (Duke University Medical Center). The Canadian Longitudinal Study on Aging received permission from Dr. Fillenbaum (instrument developer) for the use of this instrument.

|                 |                                                                                                                                                                                                                                                                                                                                                                                                                                                                                                                                                                                                                                                                                                                                                                                                                                                                                                                                                                                        |
|-----------------|----------------------------------------------------------------------------------------------------------------------------------------------------------------------------------------------------------------------------------------------------------------------------------------------------------------------------------------------------------------------------------------------------------------------------------------------------------------------------------------------------------------------------------------------------------------------------------------------------------------------------------------------------------------------------------------------------------------------------------------------------------------------------------------------------------------------------------------------------------------------------------------------------------------------------------------------------------------------------------------|
| <b>Overview</b> | <p>Activities of daily living assess respondents' ability to perform <u>basic</u> daily activities. Activities of daily living are the tasks considered vital to live independently in the community. This module contains key activities relevant to neurocognitive disorders and is a subset of the list of questions asked to the informant regarding the participant's ability to perform activities independently. The informant supplied data will in most cases be used to determine the participant's functional abilities. Exceptions would include where the informant is not able to respond to the functional questions or where the accuracy of the information they provide is judged less reliable than the information provided by the participant.</p> <p>Clinicians are expected to complete all items in this module. However, they have flexibility in determining the order in which the questions are asked and the specific wording used for each question.</p> |
|-----------------|----------------------------------------------------------------------------------------------------------------------------------------------------------------------------------------------------------------------------------------------------------------------------------------------------------------------------------------------------------------------------------------------------------------------------------------------------------------------------------------------------------------------------------------------------------------------------------------------------------------------------------------------------------------------------------------------------------------------------------------------------------------------------------------------------------------------------------------------------------------------------------------------------------------------------------------------------------------------------------------|

Now I'd like to ask you about activities of daily living. You may feel that some of these questions do not apply to you, but it is important that we ask the same questions of everyone.

|                                                                                                                 |                      |                                             |
|-----------------------------------------------------------------------------------------------------------------|----------------------|---------------------------------------------|
| <b>ADL_1</b>                                                                                                    | <b>ADL_ABLDR_MSP</b> |                                             |
| <b>[ALWAYS ASK]</b>                                                                                             |                      |                                             |
| Can you dress and undress yourself without help (including picking out clothes and putting on socks and shoes)? |                      |                                             |
| YES                                                                                                             | 1                    | Yes                                         |
| NO                                                                                                              | 2                    | No                                          |
| DK_NA                                                                                                           | 8                    | <b>[DO NOT READ]</b> Don't know / No answer |
| REFUSED                                                                                                         | 9                    | <b>[DO NOT READ]</b> Refused                |

|                                                    |                     |                                             |
|----------------------------------------------------|---------------------|---------------------------------------------|
| <b>ADL_2</b>                                       | <b>ADL_HPDR_MSP</b> |                                             |
| <b>[ASK IF ADL_ABLDR_MSP = NO]</b>                 |                     |                                             |
| Can you dress and undress yourself with some help? |                     |                                             |
| YES                                                | 1                   | Yes                                         |
| NO                                                 | 2                   | No                                          |
| DK_NA                                              | 8                   | <b>[DO NOT READ]</b> Don't know / No answer |
| REFUSED                                            | 9                   | <b>[DO NOT READ]</b> Refused                |



|                                                          |                     |                                             |
|----------------------------------------------------------|---------------------|---------------------------------------------|
| <b>ADL_3</b>                                             | <b>ADL_UNDR_MSP</b> |                                             |
| <b>[ASK IF ADL_HPDR_MSP = NO]</b>                        |                     |                                             |
| Are you completely unable to dress and undress yourself? |                     |                                             |
| YES                                                      | 1                   | Yes                                         |
| NO                                                       | 2                   | No                                          |
| DK_NA                                                    | 8                   | <b>[DO NOT READ]</b> Don't know / No answer |
| REFUSED                                                  | 9                   | <b>[DO NOT READ]</b> Refused                |

|                                             |                      |                                             |
|---------------------------------------------|----------------------|---------------------------------------------|
| <b>ADL_4</b>                                | <b>ADL_ABLBT_MSP</b> |                                             |
| <b>[ALWAYS ASK]</b>                         |                      |                                             |
| Can you take a bath or shower without help? |                      |                                             |
| YES                                         | 1                    | Yes                                         |
| NO                                          | 2                    | No                                          |
| DK_NA                                       | 8                    | <b>[DO NOT READ]</b> Don't know / No answer |
| REFUSED                                     | 9                    | <b>[DO NOT READ]</b> Refused                |

|                                                                                                                                                           |                     |                                             |
|-----------------------------------------------------------------------------------------------------------------------------------------------------------|---------------------|---------------------------------------------|
| <b>ADL_5</b>                                                                                                                                              | <b>ADL_HPBT_MSP</b> |                                             |
| <b>[ASK IF ADL_ABLBT_MSP = NO]</b>                                                                                                                        |                     |                                             |
| Can you take a bath or shower with some help (i.e., you need help from someone getting in and out of the tub or you need special attachments on the tub)? |                     |                                             |
| YES                                                                                                                                                       | 1                   | Yes                                         |
| NO                                                                                                                                                        | 2                   | No                                          |
| DK_NA                                                                                                                                                     | 8                   | <b>[DO NOT READ]</b> Don't know / No answer |
| REFUSED                                                                                                                                                   | 9                   | <b>[DO NOT READ]</b> Refused                |

|                                                                    |                     |                                             |
|--------------------------------------------------------------------|---------------------|---------------------------------------------|
| <b>ADL_6</b>                                                       | <b>ADL_UNBT_MSP</b> |                                             |
| <b>[ASK IF ADL_HPBT_MSP = NO]</b>                                  |                     |                                             |
| Are you completely unable to take a bath and a shower by yourself? |                     |                                             |
| YES                                                                | 1                   | Yes                                         |
| NO                                                                 | 2                   | No                                          |
| DK_NA                                                              | 8                   | <b>[DO NOT READ]</b> Don't know / No answer |
| REFUSED                                                            | 9                   | <b>[DO NOT READ]</b> Refused                |

|                                                           |                     |                                             |
|-----------------------------------------------------------|---------------------|---------------------------------------------|
| <b>ADL_7</b>                                              | <b>ADL_BATH_MSP</b> |                                             |
| <b>[ALWAYS ASK]</b>                                       |                     |                                             |
| Do you ever have trouble getting to the bathroom in time? |                     |                                             |
| YES                                                       | 1                   | Yes                                         |
| NO                                                        | 2                   | No                                          |
| DK_NA                                                     | 8                   | <b>[DO NOT READ]</b> Don't know / No answer |
| REFUSED                                                   | 9                   | <b>[DO NOT READ]</b> Refused                |

|                                                                               |                      |                                             |
|-------------------------------------------------------------------------------|----------------------|---------------------------------------------|
| <b>ADL_8</b>                                                                  | <b>ADL_INCNT_MSP</b> |                                             |
| <b>[ASK IF ADL_BATH_MSP = YES]</b>                                            |                      |                                             |
| How often do you wet or soil yourself (either day or night)? Would you say... |                      |                                             |
| <b>READ LIST, CODE ONLY ONE RESPONSE</b>                                      |                      |                                             |
| 0_1_TIME_WEEK                                                                 | 1                    | Never or less than once a week              |
| 1_2_TIME_WEEK                                                                 | 2                    | Once or twice a week                        |
| 3_MORE_TIMES_WEEK                                                             | 3                    | Three times a week or more                  |
| DK_NA                                                                         | 8                    | <b>[DO NOT READ]</b> Don't know / No answer |
| REFUSED                                                                       | 9                    | <b>[DO NOT READ]</b> Refused                |

|                                                              |                      |     |
|--------------------------------------------------------------|----------------------|-----|
| <b>ADL_9</b>                                                 | <b>ADL_NOTES_MSP</b> |     |
| <b>[ALWAYS ASK]</b>                                          |                      |     |
| Do you have any additional notes to include for this module? |                      |     |
| YES                                                          | 1                    | Yes |
| NO                                                           | 2                    | No  |

|                                                                                         |                         |  |
|-----------------------------------------------------------------------------------------|-------------------------|--|
| <b>ADL_10</b>                                                                           | <b>ADL_NOTES_SP_MSP</b> |  |
| <b>[ASK IF ADL_NOTES_MSP = YES]</b>                                                     |                         |  |
| <b>CLINICIAN NOTE:</b> Please do not enter any identifying information in this section. |                         |  |
| Please provide any notes below:                                                         |                         |  |

**ADL\_END**

## Instrumental Activities of Daily Living (IADL)

*This module contains a subset of the Activities of Daily Living questions of the OARS Multidimensional Assessment Questionnaire© developed by Dr. Gerda G. Fillenbaum (Duke University Medical Center). The Canadian Longitudinal Study on Aging received permission from Dr. Fillenbaum (instrument developer) for the use of this instrument.*

|                 |                                                                                                                                                                                                                                                                                                                                                                                                                                                                                                                                                                                                                                                                                                                                                                                                                                                                                                                                                                       |
|-----------------|-----------------------------------------------------------------------------------------------------------------------------------------------------------------------------------------------------------------------------------------------------------------------------------------------------------------------------------------------------------------------------------------------------------------------------------------------------------------------------------------------------------------------------------------------------------------------------------------------------------------------------------------------------------------------------------------------------------------------------------------------------------------------------------------------------------------------------------------------------------------------------------------------------------------------------------------------------------------------|
| <b>Overview</b> | <p>The Instrumental Activities of Daily Living (IADL) scale assesses respondents' ability to independently perform a series of daily activities.</p> <p>This module contains key instrumental activities of daily living relevant to neurocognitive disorders and is a subset of the list of questions asked to the informant regarding the participant's ability to perform activities independently. The informant supplied data will in most cases be used to determine the participant's functional abilities. Exceptions would include where the informant is not able to respond to the functional questions or where the accuracy of the information they provide is judged less reliable than the information provided by the participant.</p> <p>Clinicians are expected to complete all items in this module. However, they have flexibility in determining the order in which the questions are asked and the specific wording used for each question.</p> |
|-----------------|-----------------------------------------------------------------------------------------------------------------------------------------------------------------------------------------------------------------------------------------------------------------------------------------------------------------------------------------------------------------------------------------------------------------------------------------------------------------------------------------------------------------------------------------------------------------------------------------------------------------------------------------------------------------------------------------------------------------------------------------------------------------------------------------------------------------------------------------------------------------------------------------------------------------------------------------------------------------------|

Now I'd like to ask you about some activities of daily living. You may feel that some of these questions do not apply to you, but it is important that we ask the same questions of everyone.

|                                                                                                         |                       |                                             |
|---------------------------------------------------------------------------------------------------------|-----------------------|---------------------------------------------|
| <b>IAL_1</b>                                                                                            | <b>IAL_ABLGRO_MSP</b> |                                             |
| <b>[ALWAYS ASK]</b>                                                                                     |                       |                                             |
| Can you go shopping for groceries or clothes without help (taking care of all shopping needs yourself)? |                       |                                             |
| YES                                                                                                     | 1                     | Yes                                         |
| NO                                                                                                      | 2                     | No                                          |
| DK_NA                                                                                                   | 8                     | <b>[DO NOT READ]</b> Don't know / No answer |
| REFUSED                                                                                                 | 9                     | <b>[DO NOT READ]</b> Refused                |

|                                                                                                                            |                      |                                             |
|----------------------------------------------------------------------------------------------------------------------------|----------------------|---------------------------------------------|
| <b>IAL_2</b>                                                                                                               | <b>IAL_HPGRO_MSP</b> |                                             |
| <b>[ASK IF IAL_ABLGRO_MSP = NO]</b>                                                                                        |                      |                                             |
| Can you go shopping for groceries or clothes with some help (i.e., you need someone to go with you on all shopping trips)? |                      |                                             |
| YES                                                                                                                        | 1                    | Yes                                         |
| NO                                                                                                                         | 2                    | No                                          |
| DK_NA                                                                                                                      | 8                    | <b>[DO NOT READ]</b> Don't know / No answer |
| REFUSED                                                                                                                    | 9                    | <b>[DO NOT READ]</b> Refused                |

|                                               |                      |                                             |
|-----------------------------------------------|----------------------|---------------------------------------------|
| <b>IAL_3</b>                                  | <b>IAL_UNGRO_MSP</b> |                                             |
| <b>[ASK IF IAL_HPGRO_MSP = NO]</b>            |                      |                                             |
| Are you completely unable to do any shopping? |                      |                                             |
| YES                                           | 1                    | Yes                                         |
| NO                                            | 2                    | No                                          |
| DK_NA                                         | 8                    | <b>[DO NOT READ]</b> Don't know / No answer |
| REFUSED                                       | 9                    | <b>[DO NOT READ]</b> Refused                |

|                                                                                            |                      |                                             |
|--------------------------------------------------------------------------------------------|----------------------|---------------------------------------------|
| <b>IAL_4</b>                                                                               | <b>IAL_ABLML_MSP</b> |                                             |
| <b>[ALWAYS ASK]</b>                                                                        |                      |                                             |
| Can you prepare your own meals without help (i.e., you plan and cook full meals yourself)? |                      |                                             |
| YES                                                                                        | 1                    | Yes                                         |
| NO                                                                                         | 2                    | No                                          |
| DK_NA                                                                                      | 8                    | <b>[DO NOT READ]</b> Don't know / No answer |
| REFUSED                                                                                    | 9                    | <b>[DO NOT READ]</b> Refused                |

|                                                                                                                               |                     |                                             |
|-------------------------------------------------------------------------------------------------------------------------------|---------------------|---------------------------------------------|
| <b>IAL_5</b>                                                                                                                  | <b>IAL_HPML_MSP</b> |                                             |
| <b>[ASK IF IAL_ABLML_MSP = NO]</b>                                                                                            |                     |                                             |
| Can you prepare your own meals with some help (i.e., you can prepare some things but are unable to cook full meals yourself)? |                     |                                             |
| YES                                                                                                                           | 1                   | Yes                                         |
| NO                                                                                                                            | 2                   | No                                          |
| DK_NA                                                                                                                         | 8                   | <b>[DO NOT READ]</b> Don't know / No answer |
| REFUSED                                                                                                                       | 9                   | <b>[DO NOT READ]</b> Refused                |

|                                                 |                     |                                             |
|-------------------------------------------------|---------------------|---------------------------------------------|
| <b>IAL_6</b>                                    | <b>IAL_UNML_MSP</b> |                                             |
| <b>[ASK IF IAL_HPML_MSP = NO]</b>               |                     |                                             |
| Are you completely unable to prepare any meals? |                     |                                             |
| YES                                             | 1                   | Yes                                         |
| NO                                              | 2                   | No                                          |
| DK_NA                                           | 8                   | <b>[DO NOT READ]</b> Don't know / No answer |
| REFUSED                                         | 9                   | <b>[DO NOT READ]</b> Refused                |

|                                                                                        |                |                                             |
|----------------------------------------------------------------------------------------|----------------|---------------------------------------------|
| IAL_7                                                                                  | IAL_ABLMED_MSP |                                             |
| <b>[ALWAYS ASK]</b>                                                                    |                |                                             |
| Can you take your own medicine without help (in the right doses at the right time)?    |                |                                             |
| <b>CLINICIAN INSTRUCTIONS: IF THE PARTICIPANT OCCASIONALLY FORGETS, CODE AS 'YES'.</b> |                |                                             |
| YES                                                                                    | 1              | Yes                                         |
| NO                                                                                     | 2              | No                                          |
| DK_NA                                                                                  | 8              | <b>[DO NOT READ]</b> Don't know / No answer |
| REFUSED                                                                                | 9              | <b>[DO NOT READ]</b> Refused                |

|                                                                                                                                               |               |                                             |
|-----------------------------------------------------------------------------------------------------------------------------------------------|---------------|---------------------------------------------|
| IAL_8                                                                                                                                         | IAL_HPMED_MSP |                                             |
| <b>[ASK IF IAL_ABLMED_MSP = NO]</b>                                                                                                           |               |                                             |
| Can you take your own medicine with some help (i.e., you are able to take medicine if someone prepares it for you or reminds you to take it)? |               |                                             |
| YES                                                                                                                                           | 1             | Yes                                         |
| NO                                                                                                                                            | 2             | No                                          |
| DK_NA                                                                                                                                         | 8             | <b>[DO NOT READ]</b> Don't know / No answer |
| REFUSED                                                                                                                                       | 9             | <b>[DO NOT READ]</b> Refused                |

|                                                  |               |                                             |
|--------------------------------------------------|---------------|---------------------------------------------|
| IAL_9                                            | IAL_UNMED_MSP |                                             |
| <b>[ASK IF IAL_HPMED_MSP = NO]</b>               |               |                                             |
| Are you completely unable to take your medicine? |               |                                             |
| YES                                              | 1             | Yes                                         |
| NO                                               | 2             | No                                          |
| DK_NA                                            | 8             | <b>[DO NOT READ]</b> Don't know / No answer |
| REFUSED                                          | 9             | <b>[DO NOT READ]</b> Refused                |

|                                                                                        |                      |                                             |
|----------------------------------------------------------------------------------------|----------------------|---------------------------------------------|
| <b>IAL_10</b>                                                                          | <b>IAL_ABLMO_MSP</b> |                                             |
| <b>[ALWAYS ASK]</b>                                                                    |                      |                                             |
| Can you handle your own money without help (i.e., you write cheques, pay bills, etc.)? |                      |                                             |
| <b>CLINICIAN INSTRUCTIONS: IF THE PARTICIPANT OCCASIONALLY FORGETS, CODE AS 'YES'.</b> |                      |                                             |
| YES                                                                                    | 1                    | Yes                                         |
| NO                                                                                     | 2                    | No                                          |
| DK_NA                                                                                  | 8                    | <b>[DO NOT READ]</b> Don't know / No answer |
| REFUSED                                                                                | 9                    | <b>[DO NOT READ]</b> Refused                |

|                                                                                                                                                     |                     |                                             |
|-----------------------------------------------------------------------------------------------------------------------------------------------------|---------------------|---------------------------------------------|
| <b>IAL_11</b>                                                                                                                                       | <b>IAL_HPMO_MSP</b> |                                             |
| <b>[ASK IF IAL_ABLMO_MSP = NO]</b>                                                                                                                  |                     |                                             |
| Can you handle your own money with some help (i.e., you manage day-to-day buying but need help with managing your chequebook or paying your bills)? |                     |                                             |
| YES                                                                                                                                                 | 1                   | Yes                                         |
| NO                                                                                                                                                  | 2                   | No                                          |
| DK_NA                                                                                                                                               | 8                   | <b>[DO NOT READ]</b> Don't know / No answer |
| REFUSED                                                                                                                                             | 9                   | <b>[DO NOT READ]</b> Refused                |

|                                                 |                     |                                             |
|-------------------------------------------------|---------------------|---------------------------------------------|
| <b>IAL_12</b>                                   | <b>IAL_UNMO_MSP</b> |                                             |
| <b>[ASK IF IAL_HPMO_MSP = NO]</b>               |                     |                                             |
| Are you completely unable to handle your money? |                     |                                             |
| YES                                             | 1                   | Yes                                         |
| NO                                              | 2                   | No                                          |
| DK_NA                                           | 8                   | <b>[DO NOT READ]</b> Don't know / No answer |
| REFUSED                                         | 9                   | <b>[DO NOT READ]</b> Refused                |

|                                                                                         |                      |                                             |
|-----------------------------------------------------------------------------------------|----------------------|---------------------------------------------|
| <b>IAL_13</b>                                                                           | <b>IAL_FUNCT_MSP</b> |                                             |
| <b>[ALWAYS ASK]</b>                                                                     |                      |                                             |
| Have you experienced any changes in your functional abilities due to cognitive changes? |                      |                                             |
| YES                                                                                     | 1                    | Yes                                         |
| NO                                                                                      | 2                    | No                                          |
| DK_NA                                                                                   | 8                    | <b>[DO NOT READ]</b> Don't know / No answer |
| REFUSED                                                                                 | 9                    | <b>[DO NOT READ]</b> Refused                |

|                                                              |                      |     |
|--------------------------------------------------------------|----------------------|-----|
| <b>IAL_14</b>                                                | <b>IAL_NOTES_MSP</b> |     |
| <b>[ALWAYS ASK]</b>                                          |                      |     |
| Do you have any additional notes to include for this module? |                      |     |
| YES                                                          | 1                    | Yes |
| NO                                                           | 2                    | No  |

|                                                                                         |                         |  |
|-----------------------------------------------------------------------------------------|-------------------------|--|
| <b>IAL_15</b>                                                                           | <b>IAL_NOTES_SP_MSP</b> |  |
| <b>[ASK IF IAL_NOTES_MSP = YES]</b>                                                     |                         |  |
| <b>CLINICIAN NOTE:</b> Please do not enter any identifying information in this section. |                         |  |
| Please provide any notes below:                                                         |                         |  |

**IAL\_END**

## Transportation (TRA)

|                 |                                                                                                                                                                                                                                                                                                                                                                                                                                                                                                                                                                                                                                                                                                                                                                       |
|-----------------|-----------------------------------------------------------------------------------------------------------------------------------------------------------------------------------------------------------------------------------------------------------------------------------------------------------------------------------------------------------------------------------------------------------------------------------------------------------------------------------------------------------------------------------------------------------------------------------------------------------------------------------------------------------------------------------------------------------------------------------------------------------------------|
| <b>Overview</b> | <p>The questions in this module ask participants about their driving status, and details regarding their license status.</p> <p>The informant is also being asked questions about the participant's driving. The informant supplied data will in most cases be used to determine the participant's driving status. Exceptions would include where the informant is not able to respond to the functional questions or where the accuracy of the information they provide is judged less reliable than the information provided by the participant.</p> <p>Clinicians are expected to complete all items in this module. However, they have flexibility in determining the order in which the questions are asked and the specific wording used for each question.</p> |
|-----------------|-----------------------------------------------------------------------------------------------------------------------------------------------------------------------------------------------------------------------------------------------------------------------------------------------------------------------------------------------------------------------------------------------------------------------------------------------------------------------------------------------------------------------------------------------------------------------------------------------------------------------------------------------------------------------------------------------------------------------------------------------------------------------|

|                                                                                                                 |                        |                                                                                                                                                      |
|-----------------------------------------------------------------------------------------------------------------|------------------------|------------------------------------------------------------------------------------------------------------------------------------------------------|
| <b>TRA_1</b>                                                                                                    | <b>TRA_DSTATUS_MSP</b> |                                                                                                                                                      |
| <b>[ALWAYS ASK]</b>                                                                                             |                        |                                                                                                                                                      |
| Which of the following describes the participant's driving status? (Include cars, vans, trucks and motorcycles) |                        |                                                                                                                                                      |
| <b>READ LIST, CODE ONLY ONE RESPONSE</b>                                                                        |                        |                                                                                                                                                      |
| NEVER                                                                                                           | 1                      | Never had a driver's license                                                                                                                         |
| FORMER                                                                                                          | 2                      | Had a driver's license at one point in his or her life, but currently do not have it                                                                 |
| CURRENT                                                                                                         | 3                      | Have a driver's license without restrictions (except corrective lenses )                                                                             |
| RESTRICTED                                                                                                      | 4                      | Have a driver's license with restrictions on time of driving (daylight only), distance from home, type of road (no highway), or number of passengers |
| DK_NA                                                                                                           | 8                      | <b>[DO NOT READ]</b> Don't know / No answer                                                                                                          |
| REFUSED                                                                                                         | 9                      | <b>[DO NOT READ]</b> Refused                                                                                                                         |

|                                       |                     |                                             |
|---------------------------------------|---------------------|---------------------------------------------|
| <b>TRA_2</b>                          | <b>TRA_STOP_MSP</b> |                                             |
| <b>[ASK IF TRA_STA_MSP = FORMER]</b>  |                     |                                             |
| Why did the participant stop driving? |                     |                                             |
| <b>CODE ONLY ONE RESPONSE</b>         |                     |                                             |
| VOL_STOP                              | 1                   | Voluntarily stopped driving                 |
| LICS_RESC                             | 2                   | License rescinded                           |
| OT_SP                                 | 3                   | Other (please specify: _____)               |
| DK_NA                                 | 8                   | <b>[DO NOT READ]</b> Don't know / No answer |
| REFUSED                               | 9                   | <b>[DO NOT READ]</b> Refused                |



|                                                               |                       |                                                          |  |
|---------------------------------------------------------------|-----------------------|----------------------------------------------------------|--|
| <b>TRA_3</b>                                                  | <b>TRA_STOPYR_MSP</b> |                                                          |  |
| <b>[ASK IF TRA_STA_MSP = FORMER]</b>                          |                       |                                                          |  |
| At what age or in what year did the participant stop driving? |                       |                                                          |  |
| YR_SP                                                         | Year                  | _____ <b>[MASK: MIN=YEAR OF BIRTH, MAX=CURRENT YEAR]</b> |  |
| NB_SP                                                         | Age                   | _____ <b>[MASK:MIN=00, MAX=CURRENT AGE]</b>              |  |
| DK_NA                                                         | 9998                  | <b>[DO NOT READ]</b> Don't know / No answer              |  |
| REFUSED                                                       | 9999                  | <b>[DO NOT READ]</b> Refused                             |  |

|                                                              |                      |   |     |
|--------------------------------------------------------------|----------------------|---|-----|
| <b>TRA_4</b>                                                 | <b>TRA_NOTES_MSP</b> |   |     |
| <b>[ALWAYS ASK]</b>                                          |                      |   |     |
| Do you have any additional notes to include for this module? |                      |   |     |
| YES                                                          |                      | 1 | Yes |
| NO                                                           |                      | 2 | No  |

|                                                                                         |                         |  |  |
|-----------------------------------------------------------------------------------------|-------------------------|--|--|
| <b>TRA_5</b>                                                                            | <b>TRA_NOTES_SP_MSP</b> |  |  |
| <b>[ASK IF TRA_NOTES_MSP = YES]</b>                                                     |                         |  |  |
| <b>CLINICIAN NOTE:</b> Please do not enter any identifying information in this section. |                         |  |  |
| Please provide any notes below:                                                         |                         |  |  |

**TRA\_END**

## Mood and Behaviour (BHV)

The first two questions of this module are from the Patient Health Questionnaire-2 (PHQ-2). It is publicly available and no permission is required to use, reproduce, or distribute the tools.

Kroenke K, Spitzer RL, Williams JB. The Patient Health Questionnaire-2: Validity of a Two-Item Depression Screener. *Medical Care*. 2003;41:1284-92. The other questions in this module capture information on mood and behaviour relevant to the diagnosis of neurocognitive disorder.

|                 |                                                                                                                                                                                                                                                                                                                                                                           |
|-----------------|---------------------------------------------------------------------------------------------------------------------------------------------------------------------------------------------------------------------------------------------------------------------------------------------------------------------------------------------------------------------------|
| <b>Overview</b> | <p>The questions in this module ask participants about their mood and behaviour.</p> <p>Clinicians are expected to complete all items in this module. However, with the exception of the first two questions (BHV_DEP1 and BHV_DEP2) they have flexibility in determining the order in which the questions are asked and the specific wording used for each question.</p> |
|-----------------|---------------------------------------------------------------------------------------------------------------------------------------------------------------------------------------------------------------------------------------------------------------------------------------------------------------------------------------------------------------------------|

**Physician Note: Please read the first two questions verbatim.**

**Over the past 2 weeks, how often have you been bothered by any of the following problems...?**

|                                              |                     |                                             |  |
|----------------------------------------------|---------------------|---------------------------------------------|--|
| <b>BHV_1</b>                                 | <b>BHV_DEP1_MSP</b> |                                             |  |
| <b>[ALWAYS ASK]</b>                          |                     |                                             |  |
| Little interest or pleasure in doing things? |                     |                                             |  |
| <b>READ LIST, CODE ONLY ONE RESPONSE</b>     |                     |                                             |  |
| NO                                           | 1                   | Not at all                                  |  |
| SEVERAL                                      | 2                   | Several days                                |  |
| HALF                                         | 3                   | More than half the days                     |  |
| EVERY                                        | 4                   | Almost every day                            |  |
| DK_NA                                        | 8                   | <b>[DO NOT READ]</b> Don't know / No answer |  |
| REFUSED                                      | 9                   | <b>[DO NOT READ]</b> Refused                |  |

|                                          |                     |                                             |  |
|------------------------------------------|---------------------|---------------------------------------------|--|
| <b>BHV_2</b>                             | <b>BHV_DEP2_MSP</b> |                                             |  |
| <b>[ALWAYS ASK]</b>                      |                     |                                             |  |
| Feeling down, depressed or hopeless?     |                     |                                             |  |
| <b>READ LIST, CODE ONLY ONE RESPONSE</b> |                     |                                             |  |
| NO                                       | 1                   | Not at all                                  |  |
| SEVERAL                                  | 2                   | Several days                                |  |
| HALF                                     | 3                   | More than half the days                     |  |
| EVERY                                    | 4                   | Almost every day                            |  |
| DK_NA                                    | 8                   | <b>[DO NOT READ]</b> Don't know / No answer |  |
| REFUSED                                  | 9                   | <b>[DO NOT READ]</b> Refused                |  |

|                                                                                                                                                     |                     |                                             |
|-----------------------------------------------------------------------------------------------------------------------------------------------------|---------------------|---------------------------------------------|
| <b>BHV_3</b>                                                                                                                                        | <b>BHV_PERS_MSP</b> |                                             |
| <b>[ALWAYS ASK]</b>                                                                                                                                 |                     |                                             |
| Has the participant noted any persistent adverse changes in their personality (such as apathy, irritability, or lability) lasting a year or longer? |                     |                                             |
| YES                                                                                                                                                 | 1                   | Yes                                         |
| NO                                                                                                                                                  | 2                   | No                                          |
| DK_NA                                                                                                                                               | 8                   | <b>[DO NOT READ]</b> Don't know / No answer |
| REFUSED                                                                                                                                             | 9                   | <b>[DO NOT READ]</b> Refused                |

|                                                    |                    |                                             |
|----------------------------------------------------|--------------------|---------------------------------------------|
| <b>BHV_4</b>                                       | <b>BHV_ANX_MSP</b> |                                             |
| <b>[ALWAYS ASK]</b>                                |                    |                                             |
| Is the participant currently experiencing anxiety? |                    |                                             |
| YES                                                | 1                  | Yes                                         |
| NO                                                 | 2                  | No                                          |
| DK_NA                                              | 8                  | <b>[DO NOT READ]</b> Don't know / No answer |
| REFUSED                                            | 9                  | <b>[DO NOT READ]</b> Refused                |

|                                                                       |                    |                                             |
|-----------------------------------------------------------------------|--------------------|---------------------------------------------|
| <b>BHV_5</b>                                                          | <b>BHV_SUS_MSP</b> |                                             |
| <b>[ALWAYS ASK]</b>                                                   |                    |                                             |
| Is the participant currently experiencing feelings of suspiciousness? |                    |                                             |
| YES                                                                   | 1                  | Yes                                         |
| NO                                                                    | 2                  | No                                          |
| DK_NA                                                                 | 8                  | <b>[DO NOT READ]</b> Don't know / No answer |
| REFUSED                                                               | 9                  | <b>[DO NOT READ]</b> Refused                |

|                                                                                                 |                    |     |
|-------------------------------------------------------------------------------------------------|--------------------|-----|
| <b>BHV_6</b>                                                                                    | <b>BHV_PSY_MSP</b> |     |
| <b>[ALWAYS ASK]</b>                                                                             |                    |     |
| Is the participant currently experiencing psychotic symptoms (delusions and/or hallucinations)? |                    |     |
| YES                                                                                             | 1                  | Yes |

|         |   |                                      |
|---------|---|--------------------------------------|
| NO      | 2 | No                                   |
| DK_NA   | 8 | [DO NOT READ] Don't know / No answer |
| REFUSED | 9 | [DO NOT READ] Refused                |

|                                                              |                      |     |
|--------------------------------------------------------------|----------------------|-----|
| <b>BHV_7</b>                                                 | <b>BHV_NOTES_MSP</b> |     |
| <b>[ALWAYS ASK]</b>                                          |                      |     |
| Do you have any additional notes to include for this module? |                      |     |
| YES                                                          | 1                    | Yes |
| NO                                                           | 2                    | No  |

|                                                                                                                                                                                                                   |                         |  |
|-------------------------------------------------------------------------------------------------------------------------------------------------------------------------------------------------------------------|-------------------------|--|
| <b>BHV_8</b>                                                                                                                                                                                                      | <b>BHV_NOTES_SP_MSP</b> |  |
| <b>[ASK IF BHV_NOTES_MSP = YES]</b>                                                                                                                                                                               |                         |  |
| <b>CLINICIAN NOTE:</b> Please do not enter any identifying information in this section.                                                                                                                           |                         |  |
| Please provide any notes below. For example, are there any other details regarding the participant's mood and behaviour that should be taken into account when interpreting the results of the cognitive testing? |                         |  |

**BHV\_END**

## Physical Examination (EXM)

|                 |                                                                                                                                                                |
|-----------------|----------------------------------------------------------------------------------------------------------------------------------------------------------------|
| <b>Overview</b> | Clinicians are expected to complete all items in this module. However, they have flexibility in determining the order in which the physical exam is completed. |
|-----------------|----------------------------------------------------------------------------------------------------------------------------------------------------------------|

|                                                                                |                      |          |
|--------------------------------------------------------------------------------|----------------------|----------|
| <b>EXM_1</b>                                                                   | <b>EXM_ALERT_MSP</b> |          |
| <b>[ALWAYS ASK]</b>                                                            |                      |          |
| Is the alertness/level of consciousness of the participant normal or abnormal? |                      |          |
| <b>CODE ONLY ONE RESPONSE</b>                                                  |                      |          |
| NRM                                                                            | 1                    | Normal   |
| ABNRM                                                                          | 2                    | Abnormal |
| UNSURE                                                                         | 7                    | Unsure   |

|                                                          |                     |     |
|----------------------------------------------------------|---------------------|-----|
| <b>EXM_2</b>                                             | <b>EXM_HEAR_MSP</b> |     |
| <b>[ALWAYS ASK]</b>                                      |                     |     |
| Is the participant willing to complete the hearing test? |                     |     |
| YES                                                      | 1                   | Yes |
| NO                                                       | 2                   | No  |

To evaluate hearing, please follow these instructions:

1. Position yourself approximately 60cm from the participant's ear
2. Mask the ear not being tested by rubbing the tragus. Do not place your arm across the face of the participant when rubbing the tragus, it is far nicer to occlude the ear from behind the head. If possible shield the participant's eyes to prevent any visual stimulus.
3. Whisper a number or word.
4. Ask the participant to repeat the number or word back to you. If they get two-thirds or more correct then their hearing level is 12db or better. If there is no response use a conversational voice (48db or louder) or loud voice (76db or louder).
5. If there is no response you can move closer and repeat the test at 15cm. Here the thresholds are 34db for a whisper and 56db for a conversational voice.
6. Assess the other ear in the same way.
7. Modifications may have to be made if personal protective equipment is worn.

|              |                            |
|--------------|----------------------------|
| <b>EXM_3</b> | <b>EXM_HEARRIGHT12_MSP</b> |
|--------------|----------------------------|

**[ASK IF EXM\_HEAR\_MSP = YES]**

Was the participant able to correctly repeat back the word or number you whispered at a distance of 60cm in their right ear?

**CODE ONLY ONE RESPONSE**

|         |   |                  |
|---------|---|------------------|
| YES     | 1 | Yes              |
| NO      | 2 | No               |
| NOTDONE | 8 | Unable to assess |

**EXM\_4 EXM\_HEARRIGHT48\_MSP****[ASK IF EXM\_HEARRIGHT12\_MSP = NO]**

Was the participant able to correctly repeat back the word or number you spoke using a conversational volume at a distance of 60cm in their right ear??

**CODE ONLY ONE RESPONSE**

|         |   |                  |
|---------|---|------------------|
| YES     | 1 | Yes              |
| NO      | 2 | No               |
| NOTDONE | 8 | Unable to assess |

**EXM\_5 EXM\_HEARRIGHT76\_MSP****[ASK IF EXM\_HEARRIGHT48\_MSP = NO]**

Was the participant able to correctly repeat back the word or number you spoke using a loud voice at a distance of 60cm in their right ear??

**CODE ONLY ONE RESPONSE**

|         |   |                  |
|---------|---|------------------|
| YES     | 1 | Yes              |
| NO      | 2 | No               |
| NOTDONE | 8 | Unable to assess |

**EXM\_6 EXM\_HEARRIGHT34\_MSP****[ASK IF EXM\_HEARRIGHT76\_MSP = NO]**

Was the participant able to correctly repeat back the word or number you whispered at a distance of 15cm in their right ear??

**CODE ONLY ONE RESPONSE**

|         |   |                  |
|---------|---|------------------|
| YES     | 1 | Yes              |
| NO      | 2 | No               |
| NOTDONE | 8 | Unable to assess |

**EXM\_7**      **EXM\_HEARRIGHT56\_MSP**

**[ASK IF EXM\_HEARRIGHT34\_MSP = NO]**

Was the participant able to correctly repeat back the word or number you spoke using a conversational volume at a distance of 15cm in their right ear??

**CODE ONLY ONE RESPONSE**

|         |   |                  |
|---------|---|------------------|
| YES     | 1 | Yes              |
| NO      | 2 | No               |
| NOTDONE | 8 | Unable to assess |

**EXM\_8**      **EXM\_HEARLEFT12\_MSP**

**[ASK IF EXM\_HEAR\_MSP = YES]**

Was the participant able to correctly repeat back the word or number you whispered at a distance of 60cm in their left ear??

**CODE ONLY ONE RESPONSE**

|         |   |                  |
|---------|---|------------------|
| YES     | 1 | Yes              |
| NO      | 2 | No               |
| NOTDONE | 8 | Unable to assess |

**EXM\_9**      **EXM\_HEARLEFT48\_MSP**

**[ASK IF EXM\_HEARLEFT12\_MSP = NO]**

Was the participant able to correctly repeat back the word or number you spoke using a conversational volume at a distance of 60cm in their left ear??

**CODE ONLY ONE RESPONSE**

|         |   |                  |
|---------|---|------------------|
| YES     | 1 | Yes              |
| NO      | 2 | No               |
| NOTDONE | 8 | Unable to assess |

**EXM\_10**      **EXM\_HEARLEFT76\_MSP**

**[ASK IF EXM\_HEARLEFT48\_MSP = NO]**

Was the participant able to correctly repeat back the word or number you spoke using a loud voice at a distance of 60cm in their left ear??

**CODE ONLY ONE RESPONSE**

|         |   |                  |
|---------|---|------------------|
| YES     | 1 | Yes              |
| NO      | 2 | No               |
| NOTDONE | 8 | Unable to assess |

**EXM\_11**      **EXM\_HEARLEFT34\_MSP**

**[ASK IF EXM\_HEARLEFT76\_MSP = NO]**

Was the participant able to correctly repeat the word or number you whispered at a distance of 15cm in their left ear??

**CODE ONLY ONE RESPONSE**

|         |   |                  |
|---------|---|------------------|
| YES     | 1 | Yes              |
| NO      | 2 | No               |
| NOTDONE | 8 | Unable to assess |

**EXM\_12**      **EXM\_HEARLEFT56\_MSP**

**[ASK IF EXM\_HEARLEFT34\_MSP = NO]**



Was the participant able to correctly repeat back the word or number you spoke using a conversational volume at a distance of 15cm in their left ear??

**CODE ONLY ONE RESPONSE**

|         |   |                  |
|---------|---|------------------|
| YES     | 1 | Yes              |
| NO      | 2 | No               |
| NOTDONE | 8 | Unable to assess |

**EXM\_13**      **EXAM\_HEARNOTES\_MSP**

**[ALWAYS ASK]**

Do you have any additional notes to include regarding the participant's hearing?

|     |   |     |
|-----|---|-----|
| YES | 1 | Yes |
| NO  | 2 | No  |

**EXM\_14**      **EXAM\_HEARNOTES\_SP\_MSP**

**[ASK IF EXAM\_HEAR\_NOTES\_MSP = YES]**

**CLINICIAN NOTE:** Please do not enter any identifying information in this section.

Please provide any notes below:

**EXM\_15**      **EXM\_SMELL\_MSP**

**[ALWAYS ASK]**

Is the participant's sense of smell normal or abnormal?

**CODE ONLY ONE RESPONSE**

|        |   |          |
|--------|---|----------|
| NRM    | 1 | Normal   |
| ABNRM  | 2 | Abnormal |
| UNSURE | 7 | Unsure   |

**EXM\_16**      **EXM\_FOCAL\_MSP**

**[ALWAYS ASK]**

Are there any focal/lateralizing neurological findings to note?

| <b>MULTIPLE RESPONSES ALLOWED, CODE ALL THAT APPLY (EXCEPT IF 96 IS SELECTED)</b> |    |                                 |
|-----------------------------------------------------------------------------------|----|---------------------------------|
| VIS                                                                               | 01 | Visual field defect             |
| EXT                                                                               | 02 | Abnormal extra-ocular movements |
| RGD                                                                               | 03 | Rigidity                        |
| WKN                                                                               | 04 | Weakness                        |
| SP                                                                                | 05 | Speech                          |
| NONE                                                                              | 96 | None                            |
| OTSP                                                                              | 97 | Other: Please specify:          |

|                                          |                            |
|------------------------------------------|----------------------------|
| <b>EXM_17</b>                            | <b>EXM_FOCALVIS_SP_MSP</b> |
| <b>[ASK IF EXAM_FOCAL_MSP = VIS]</b>     |                            |
| Please describe the visual field defect: |                            |
| Open text: _____                         |                            |

|                                                      |                            |
|------------------------------------------------------|----------------------------|
| <b>EXM_18</b>                                        | <b>EXM_FOCALEXT_SP_MSP</b> |
| <b>[ASK IF EXAM_FOCAL_MSP = EXT]</b>                 |                            |
| Please describe the abnormal extra-ocular movements: |                            |
| Open text: _____                                     |                            |

|                                                           |                            |
|-----------------------------------------------------------|----------------------------|
| <b>EXM_19</b>                                             | <b>EXM_FOCALRGD_SP_MSP</b> |
| <b>[ASK IF EXAM_FOCAL_MSP = RGD]</b>                      |                            |
| Please describe the rigidity observed in the participant: |                            |
| Open text: _____                                          |                            |

|                                                           |                            |
|-----------------------------------------------------------|----------------------------|
| <b>EXM_20</b>                                             | <b>EXM_FOCALWKN_SP_MSP</b> |
| <b>[ASK IF EXAM_FOCAL_MSP = WKN]</b>                      |                            |
| Please describe the weakness observed in the participant: |                            |

Open text: \_\_\_\_\_

**EXM\_21**      **EXM\_FOCALSP\_SP\_MSP**

**[ASK IF EXAM\_FOCAL\_MSP = SP]**

Please describe the speech abnormalities observed in the participant:

Open text: \_\_\_\_\_

**EXM\_22**      **EXM\_FOCALOTSP\_SP\_MSP**

**[ASK IF EXAM\_FOCAL\_MSP = OTSP]**

Please describe any other abnormalities observed in the participant:

Open text: \_\_\_\_\_

**EXM\_23**      **EXM\_EXPYR\_MSP**

**[ALWAYS ASK]**

Are there any extrapyramidal signs observed?

**MULTIPLE RESPONSES ALLOWED (EXCEPT IF 96 IS SELECTED), CODE ALL THAT APPLY**

|      |    |                |
|------|----|----------------|
| TRM  | 01 | Tremor         |
| RGD  | 02 | Rigidity       |
| BKN  | 03 | Bradykinesia   |
| PST  | 04 | Posture        |
| NONE | 96 | None           |
| OTSP | 97 | Other: specify |

**EXM\_24**      **EXM\_EXPYRNOTES\_MSP**

**[ASK IF EXM\_EXPYR\_MSP = TRM, RGD, BKN, or PST]**

Please describe the extrapyramidal signs if required.

|                  |   |                                             |
|------------------|---|---------------------------------------------|
| Open text: _____ |   |                                             |
| DK_NA            | 8 | <b>[DO NOT READ]</b> Don't know / No answer |

|                                                                                 |                       |          |
|---------------------------------------------------------------------------------|-----------------------|----------|
| <b>EXM_25</b>                                                                   | <b>EXM_TRANSF_MSP</b> |          |
| <b>[ALWAYS ASK]</b>                                                             |                       |          |
| How would you evaluate the participant's ability to do a sit to stand transfer? |                       |          |
| <b>CODE ONLY ONE RESPONSE</b>                                                   |                       |          |
| NRM                                                                             | 1                     | Normal   |
| ABNRM                                                                           | 2                     | Abnormal |
| UNSURE                                                                          | 7                     | Unsure   |

|                                                                                                                                                                                                                                                                                                                                                                                                                                                                                                                                                                                                 |                        |                  |
|-------------------------------------------------------------------------------------------------------------------------------------------------------------------------------------------------------------------------------------------------------------------------------------------------------------------------------------------------------------------------------------------------------------------------------------------------------------------------------------------------------------------------------------------------------------------------------------------------|------------------------|------------------|
| <b>EXM_26</b>                                                                                                                                                                                                                                                                                                                                                                                                                                                                                                                                                                                   | <b>EXM_BALANCE_MSP</b> |                  |
| <b>[ALWAYS ASK]</b>                                                                                                                                                                                                                                                                                                                                                                                                                                                                                                                                                                             |                        |                  |
| How would you evaluate the participant's stability using the Romberg test?                                                                                                                                                                                                                                                                                                                                                                                                                                                                                                                      |                        |                  |
| <b>CLINICIAN NOTES:</b> The Romberg test requires that the participant removes their shoes. Participants will be asked to stand with their feet together on a flat, hard surface. The participant will be asked to cross their arms in front of their body or place them at their sides. The participant will be asked to stand still and keep their eyes open for approximately 30 seconds while the examining clinician observes. The participant will then be asked to close their eyes and stand for an addition 30 seconds. The examining clinician will assess body movement and balance. |                        |                  |
| <b>CODE ONLY ONE RESPONSE</b>                                                                                                                                                                                                                                                                                                                                                                                                                                                                                                                                                                   |                        |                  |
| NRM                                                                                                                                                                                                                                                                                                                                                                                                                                                                                                                                                                                             | 1                      | Normal           |
| ABNRM                                                                                                                                                                                                                                                                                                                                                                                                                                                                                                                                                                                           | 2                      | Abnormal         |
| NOTDONE                                                                                                                                                                                                                                                                                                                                                                                                                                                                                                                                                                                         | 8                      | Unable to assess |

|                                                      |                        |  |
|------------------------------------------------------|------------------------|--|
| <b>EXM_27</b>                                        | <b>EXM_GAITSPD_MSP</b> |  |
| <b>[ALWAYS ASK]</b>                                  |                        |  |
| Does the participant have normal or slow gait speed? |                        |  |

**CLINICIAN NOTES:** Gait speed may be evaluated by watching the participant move around the Data Collection Site.

**CODE ONLY ONE RESPONSE**

|         |   |                  |
|---------|---|------------------|
| NRM     | 1 | Normal           |
| SLOW    | 2 | Slow             |
| NOTDONE | 8 | Unable to assess |

**EXM\_28**      **EXM\_GAIT\_MSP**

**[ALWAYS ASK]**

Did you observe any gait abnormalities?

**MULTIPLE RESPONSES ALLOWED (EXCEPT IF 96 ISSELECTED), CODE ALL THAT APPLY**

|         |    |                                                                  |
|---------|----|------------------------------------------------------------------|
| NO      | 01 | No gait abnormalities                                            |
| NN      | 02 | Abnormal gait speed due to non-neurologic cause (e.g. arthritis) |
| ST      | 03 | Unsteady                                                         |
| FR      | 04 | Frontal                                                          |
| HM      | 05 | Hemiparetic                                                      |
| NR      | 06 | Neuropathic                                                      |
| AT      | 07 | Ataxic                                                           |
| PK      | 08 | Parkinsonian                                                     |
| SP      | 09 | Spastic                                                          |
| NOTDONE | 96 | Unable to assess                                                 |

**EXM\_29**      **EXM\_BALGAITNOTES\_MSP**

**[ASK IF EXM\_TRANSF\_MSP = ABNRM, OR EXM\_BALANCE\_MSP = ABNRM, OR EXM\_GAITSPD\_MSP = SLOW, OR EXM\_GAITMSP = NN, ST, FR, HM, NR, AT, PK, or SP]**

Please describe any abnormalities in transferring, balance, or gait.

**EXM\_30**      **EXM\_NOTES\_MSP**

**[ALWAYS ASK]**

Do you have any additional notes to include for this module? For example, are there any other findings from the physical examination that should be taken into account when interpreting the results of the cognitive testing?

|     |   |     |
|-----|---|-----|
| YES | 1 | Yes |
|-----|---|-----|

1  
2  
3  
4  
5  
6  
7  
8  
9  
10  
11  
12  
13  
14  
15  
16  
17  
18  
19  
20  
21  
22  
23  
24  
25  
26  
27  
28  
29  
30  
31  
32  
33  
34  
35  
36  
37  
38  
39  
40  
41  
42  
43  
44  
45  
46  
47  
48  
49  
50  
51  
52  
53  
54  
55  
56  
57  
58  
59  
60

|    |   |    |
|----|---|----|
| NO | 2 | No |
|----|---|----|

|                                                                                         |                         |
|-----------------------------------------------------------------------------------------|-------------------------|
| <b>EXM_31</b>                                                                           | <b>EXM_NOTES_SP_MSP</b> |
| <b>[ASK IF EXM_NOTES_MSP = YES]</b>                                                     |                         |
| <b>CLINICIAN NOTE:</b> Please do not enter any identifying information in this section. |                         |
| Please provide any notes below:                                                         |                         |

**EXM\_END**

For peer review only

## Montreal Cognitive Assessment (MoCA)

Training and certification is required by any clinical, health professional, or worker who wishes to administer, score and interpret the Montreal Cognitive Assessment (MoCA) test. The MoCA © may be used, reproduced, and distributed **WITH** permission for universities/foundations/health professionals/hospitals/clinics/public health institutes.

|                 |                                                                                                                                                                                                                                                                                                                                                                                                                                                                                                                                                                                                                                                                                                                                                                                                                                                                                                                                                                                                                                                                                                                                                                                                                                                                                                                                                                                                                                                                                                                                                                                                                                                                                                                                                                                                                                                                                                                                                                                                                                                                                                                                                |
|-----------------|------------------------------------------------------------------------------------------------------------------------------------------------------------------------------------------------------------------------------------------------------------------------------------------------------------------------------------------------------------------------------------------------------------------------------------------------------------------------------------------------------------------------------------------------------------------------------------------------------------------------------------------------------------------------------------------------------------------------------------------------------------------------------------------------------------------------------------------------------------------------------------------------------------------------------------------------------------------------------------------------------------------------------------------------------------------------------------------------------------------------------------------------------------------------------------------------------------------------------------------------------------------------------------------------------------------------------------------------------------------------------------------------------------------------------------------------------------------------------------------------------------------------------------------------------------------------------------------------------------------------------------------------------------------------------------------------------------------------------------------------------------------------------------------------------------------------------------------------------------------------------------------------------------------------------------------------------------------------------------------------------------------------------------------------------------------------------------------------------------------------------------------------|
| <b>Overview</b> | <p>The Montreal Cognitive Assessment (MoCA) was designed as a rapid screening instrument for mild cognitive dysfunction. It assesses different cognitive domains: attention and concentration, executive functions, memory, language, visuoconstructional skills, conceptual thinking, calculations, and orientation. Time to administer the MoCA is approximately 10 minutes. The total possible score is 30 points; a score of 26 or above is considered normal. There is an additional point added to the obtained score if the person being tested has 12 or fewer years of formal education. For the purposes of the CLSA Memory Study, we will categorize participant that did not graduate from secondary school or those who graduated secondary school but did not complete post-secondary education as having 12 or fewer years of formal education.</p> <p>The MoCA memory section provides two trials to learn a word list of five nouns followed by a delay in which subjects are asked questions from other sections of the MoCA (i.e., attention, sentence repetition, letter fluency, similarities). The delay is variable, but estimated at five minutes followed by free recall of the 5-word list. This is followed by a category-cued semantic recall condition, and, finally, a multiple choice-cued recall from presentation of the correct item paired with two items within the same category but not on the list. Only the points earned in the delayed <i>free</i> recall condition of the memory section (1 point per correct word) are added to the MoCA total score. The MoCA-MIS includes points for the free recall condition and the cued conditions (3 points for each word on free recall, 2 for each on category-cued recall, 1 for each on multiple-choice recall).</p> <p>For those with severe visual impairment, the MoCA-BLIND can be utilized. This is scored out of 22 with normal being a score of 18 or higher. The correction for limited formal education described above is also used for the MoCA-BLIND.</p> <p>Clinicians are expected to complete this module using the provided script.</p> |
|-----------------|------------------------------------------------------------------------------------------------------------------------------------------------------------------------------------------------------------------------------------------------------------------------------------------------------------------------------------------------------------------------------------------------------------------------------------------------------------------------------------------------------------------------------------------------------------------------------------------------------------------------------------------------------------------------------------------------------------------------------------------------------------------------------------------------------------------------------------------------------------------------------------------------------------------------------------------------------------------------------------------------------------------------------------------------------------------------------------------------------------------------------------------------------------------------------------------------------------------------------------------------------------------------------------------------------------------------------------------------------------------------------------------------------------------------------------------------------------------------------------------------------------------------------------------------------------------------------------------------------------------------------------------------------------------------------------------------------------------------------------------------------------------------------------------------------------------------------------------------------------------------------------------------------------------------------------------------------------------------------------------------------------------------------------------------------------------------------------------------------------------------------------------------|

|                                                                                                                                                        |                      |     |
|--------------------------------------------------------------------------------------------------------------------------------------------------------|----------------------|-----|
| <b>MOC_1</b>                                                                                                                                           | <b>MOC_SIGHT_MSP</b> |     |
| <b>[ALWAYS ASK]</b>                                                                                                                                    |                      |     |
| Does the participant have any visual impairments that would prevent them from completing the standard MoCA which requires drawing on a piece of paper? |                      |     |
| YES                                                                                                                                                    | 1                    | Yes |
| NO                                                                                                                                                     | 2                    | No  |

### 1. Alternating Trail Making:

**Administration:** The examiner instructs the subject: "Please draw a line, going from a number to a letter in ascending order. Begin here [point to (1)] and draw a line from 1 then to A then to 2 and so on. End here [point to (E)]."

|                                                                                                                                                                                                                |                      |                                                     |
|----------------------------------------------------------------------------------------------------------------------------------------------------------------------------------------------------------------|----------------------|-----------------------------------------------------|
| <b>MOC_2</b>                                                                                                                                                                                                   | <b>MOC_TRAIL_MSP</b> |                                                     |
| <b>[ASK IF MOC_SIGHT_MSP = NO]</b>                                                                                                                                                                             |                      |                                                     |
| Was the participant able to successfully complete the Alternating Trail Making task?                                                                                                                           |                      |                                                     |
| <b>CLINICIAN NOTE:</b> Successfully completing the Alternating Trail Making task required the participant to successfully draw the following pattern: 1-A-2-B-3-C-4-D-5-E without drawing any lines that cross |                      |                                                     |
| <b>CODE ONLY ONE RESPONSE</b>                                                                                                                                                                                  |                      |                                                     |
| YES                                                                                                                                                                                                            | 1                    | Yes                                                 |
| NO                                                                                                                                                                                                             | 2                    | No                                                  |
| REFUSED                                                                                                                                                                                                        | 9                    | <b>[DO NOT READ]</b> Participant refused to do task |

## **2. Visuoconstructional Skills (Cube):**

**Administration:** The examiner gives the following instructions, pointing to the cube: "Copy this drawing as accurately as you can, in the space below".

|                                                                                                                                                                                                                                         |                     |                                                     |
|-----------------------------------------------------------------------------------------------------------------------------------------------------------------------------------------------------------------------------------------|---------------------|-----------------------------------------------------|
| <b>MOC_3</b>                                                                                                                                                                                                                            | <b>MOC_CUBE_MSP</b> |                                                     |
| <b>[ASK IF MOC_SIGHT_MSP = NO]</b>                                                                                                                                                                                                      |                     |                                                     |
| Was the participant able to successfully complete the cube drawing task?                                                                                                                                                                |                     |                                                     |
| <b>CODE ONLY ONE RESPONSE</b>                                                                                                                                                                                                           |                     |                                                     |
| <b>CLINICIAN NOTE:</b> A successfully executed drawing must be:                                                                                                                                                                         |                     |                                                     |
| <ul style="list-style-type: none"> <li>• Three-dimensional</li> <li>• All lines are drawn</li> <li>• No line is added</li> <li>• Lines are relatively parallel and their length is similar (rectangular prisms are accepted)</li> </ul> |                     |                                                     |
| If any of the above criteria are not met, the cube was not successfully drawn.                                                                                                                                                          |                     |                                                     |
| YES                                                                                                                                                                                                                                     | 1                   | Yes                                                 |
| NO                                                                                                                                                                                                                                      | 2                   | No                                                  |
| REFUSED                                                                                                                                                                                                                                 | 9                   | <b>[DO NOT READ]</b> Participant refused to do task |

## **3. Visuoconstructional Skills (Clock):**



**Administration:** Indicate the right third of the space and give the following instructions: “Draw a clock. Put in all the numbers and set the time to 10 past 11”.

|                                                                                                                                                                                                                                      |                         |                                                     |
|--------------------------------------------------------------------------------------------------------------------------------------------------------------------------------------------------------------------------------------|-------------------------|-----------------------------------------------------|
| <b>MOC_4</b>                                                                                                                                                                                                                         | <b>MOC_CLOCKCON_MSP</b> |                                                     |
| <b>[ASK IF MOC_SIGHT_MSP = NO]</b>                                                                                                                                                                                                   |                         |                                                     |
| Contour - Did the participant successfully draw the circle of the clock?                                                                                                                                                             |                         |                                                     |
| <b>CLINICIAN NOTE:</b> For contour, a clock that has been correctly drawn must meet the following criteria: The clock face must be a circle with only minor distortion acceptable (e.g., slight imperfection on closing the circle). |                         |                                                     |
| <b>CODE ONLY ONE RESPONSE</b>                                                                                                                                                                                                        |                         |                                                     |
| YES                                                                                                                                                                                                                                  | 1                       | Yes                                                 |
| NO                                                                                                                                                                                                                                   | 2                       | No                                                  |
| REFUSED                                                                                                                                                                                                                              | 9                       | <b>[DO NOT READ]</b> Participant refused to do task |

|                                                                                                                                                                                                                                                                                                                                                                |                         |                                                     |
|----------------------------------------------------------------------------------------------------------------------------------------------------------------------------------------------------------------------------------------------------------------------------------------------------------------------------------------------------------------|-------------------------|-----------------------------------------------------|
| <b>MOC_5</b>                                                                                                                                                                                                                                                                                                                                                   | <b>MOC_CLOCKNUM_MSP</b> |                                                     |
| <b>[ASK IF MOC_SIGHT_MSP = NO]</b>                                                                                                                                                                                                                                                                                                                             |                         |                                                     |
| Numbers – Did the participant successfully draw the numbers on the clock?                                                                                                                                                                                                                                                                                      |                         |                                                     |
| <b>CLINICIAN NOTE:</b> For the numbers, a clock that has been correctly drawn must meet the following criteria: All clock numbers must be present with no additional numbers; numbers must be in the correct order and placed in the approximate quadrants on the clock face; Roman numerals are acceptable; numbers can be placed outside the circle contour. |                         |                                                     |
| <b>CODE ONLY ONE RESPONSE</b>                                                                                                                                                                                                                                                                                                                                  |                         |                                                     |
| YES                                                                                                                                                                                                                                                                                                                                                            | 1                       | Yes                                                 |
| NO                                                                                                                                                                                                                                                                                                                                                             | 2                       | No                                                  |
| REFUSED                                                                                                                                                                                                                                                                                                                                                        | 9                       | <b>[DO NOT READ]</b> Participant refused to do task |

|                                    |                          |  |
|------------------------------------|--------------------------|--|
| <b>MOC_6</b>                       | <b>MOC_CLOCKHAND_MSP</b> |  |
| <b>[ASK IF MOC_SIGHT_MSP = NO]</b> |                          |  |

|                                                                                                                                                                                                                                                                                                                                   |   |                                                     |
|-----------------------------------------------------------------------------------------------------------------------------------------------------------------------------------------------------------------------------------------------------------------------------------------------------------------------------------|---|-----------------------------------------------------|
| Hands - Did the participant successfully draw the hands on the clock?                                                                                                                                                                                                                                                             |   |                                                     |
| <b>CODE ONLY ONE RESPONSE</b>                                                                                                                                                                                                                                                                                                     |   |                                                     |
| <b>CLINICIAN NOTE:</b> For the hands, a clock that has been correctly drawn must meet the following criteria: There must be two hands jointly indicating the correct time; the hour hand must be clearly shorter than the minute hand; hands must be centred within the clock face with their junction close to the clock centre. |   |                                                     |
| YES                                                                                                                                                                                                                                                                                                                               | 1 | Yes                                                 |
| NO                                                                                                                                                                                                                                                                                                                                | 2 | No                                                  |
| REFUSED                                                                                                                                                                                                                                                                                                                           | 9 | <b>[DO NOT READ]</b> Participant refused to do task |

#### **4. Naming:**

Administration: Beginning on the left, point to each figure and say: "Tell me the name of this animal".

|                                                                                                                                  |                 |                                                     |
|----------------------------------------------------------------------------------------------------------------------------------|-----------------|-----------------------------------------------------|
| MOC_7                                                                                                                            | MOC_ANIMALS_MSP |                                                     |
| <b>[ASK IF MOC_SIGHT_MSP = NO]</b>                                                                                               |                 |                                                     |
| How many animals were correctly named by the participant?                                                                        |                 |                                                     |
| <b>CLINICIAN NOTES:</b> One point is given for the following responses: (1) lion (2) rhinoceros or rhino (3) camel or dromedary. |                 |                                                     |
| <b>CODE ONLY ONE RESPONSE</b>                                                                                                    |                 |                                                     |
| ONE                                                                                                                              | 1               | One                                                 |
| TWO                                                                                                                              | 2               | Two                                                 |
| THREE                                                                                                                            | 3               | Three                                               |
| NONE                                                                                                                             | 4               | None of the animals were correctly named            |
| REFUSED                                                                                                                          | 9               | <b>[DO NOT READ]</b> Participant refused to do task |

#### **5. Memory:**

Administration: The examiner reads a list of 5 words at a rate of one per second, giving the following instructions: "This is a memory test. I am going to read a list of words that you will have to remember now"

1  
2  
3 *and later on. Listen carefully. When I am through, tell me as many words as you can remember. It doesn't*  
4 *matter in what order you say them".*  
5

6 "Face, velvet, church, daisy, red"  
7

8 Administration: When the subject indicates that (s)he has finished (has recalled all words), or can recall  
9 no more words, read the list a second time with the following instructions: "*I am going to read the same*  
10 *list for a second time. Try to remember and tell me as many words as you can, including words you said*  
11 *the first time."*

12 "Face, velvet, church, daisy, red"  
13

14 Administration: At the end of the second trial, inform the participant that he/she will be asked to recall  
15 these words again by saying: "*I will ask you to recall these words again at the end of the test."*

16  
17 **6. Attention:**  
18

19 Forward Digit Span: Administration: Give the following instruction: "*I am going to say some numbers and*  
20 *when I am through, repeat them to me exactly as I said them".* Read the five number sequence at the rate  
21 of one digit per second.  
22

23 "2, 1, 8, 5, 4"  
24

|                                                                                      |                 |                                                     |
|--------------------------------------------------------------------------------------|-----------------|-----------------------------------------------------|
| MOC_8                                                                                | MOC_NUMFORW_MSP |                                                     |
| <b>[ALWAYS ASK]</b>                                                                  |                 |                                                     |
| Was the participant able to repeat the numbers "2, 1, 8, 5, 4" in the forward order? |                 |                                                     |
| <b>CODE ONLY ONE RESPONSE</b>                                                        |                 |                                                     |
| YES                                                                                  | 1               | Yes                                                 |
| NO                                                                                   | 2               | No                                                  |
| REFUSED                                                                              | 9               | <b>[DO NOT READ]</b> Participant refused to do task |

25  
26  
27  
28  
29  
30  
31  
32  
33  
34  
35  
36  
37  
38  
39 Attention, Backward Digit Span: Administration: Give the following instruction: "*Now I am going to say*  
40 *some more numbers, but when I am through you must repeat them to me in the backwards order."*

41 "7, 4, 2."  
42  
43

|                                                                                 |                 |                                                     |
|---------------------------------------------------------------------------------|-----------------|-----------------------------------------------------|
| MOC_9                                                                           | MOC_NUMBACK_MSP |                                                     |
| <b>[ALWAYS ASK]</b>                                                             |                 |                                                     |
| Was the participant able to repeat the numbers "7, 4, 2" in the backward order? |                 |                                                     |
| <b>CODE ONLY ONE RESPONSE</b>                                                   |                 |                                                     |
| YES                                                                             | 1               | Yes                                                 |
| NO                                                                              | 2               | No                                                  |
| REFUSED                                                                         | 9               | <b>[DO NOT READ]</b> Participant refused to do task |

**Vigilance:** The examiner reads the list of letters at a rate of one per second, after giving the following instruction: “I am going to read a sequence of letters. Every time I say the letter A, tap your hand once. If a say a different letter, do not tap your hand”.

“F B A C M N A A J K L B A F A K D E A A A J A M O F A A B”

|                                                                                                                    |                       |                                                     |
|--------------------------------------------------------------------------------------------------------------------|-----------------------|-----------------------------------------------------|
| <b>MOC_10</b>                                                                                                      | <b>MOC_LETTER_MSP</b> |                                                     |
| <b>[ALWAYS ASK]</b>                                                                                                |                       |                                                     |
| Did the participant make zero to one errors (an error is a tap on a wrong letter or a failure to tap on letter A)? |                       |                                                     |
| <b>CODE ONLY ONE RESPONSE</b>                                                                                      |                       |                                                     |
| YES                                                                                                                | 1                     | Yes, the participant made 0 or one errors           |
| NO                                                                                                                 | 2                     | No, the participant made two or more errors         |
| REFUSED                                                                                                            | 9                     | <b>[DO NOT READ]</b> Participant refused to do task |

**Serial 7s:** The examiner gives the following instruction: “Now, I will ask you to count by subtracting seven from 100, and then, keep subtracting seven from your answer until I tell you to stop”. Give this instruction twice if necessary.

|                                                                                                                                                                                                                                                                                                                                                                                                                                                                                                                                                                                                                                                                                                                                                                  |                     |                                                     |
|------------------------------------------------------------------------------------------------------------------------------------------------------------------------------------------------------------------------------------------------------------------------------------------------------------------------------------------------------------------------------------------------------------------------------------------------------------------------------------------------------------------------------------------------------------------------------------------------------------------------------------------------------------------------------------------------------------------------------------------------------------------|---------------------|-----------------------------------------------------|
| <b>MOC_11</b>                                                                                                                                                                                                                                                                                                                                                                                                                                                                                                                                                                                                                                                                                                                                                    | <b>MOC_SUBS_MSP</b> |                                                     |
| <b>[ALWAYS ASK]</b>                                                                                                                                                                                                                                                                                                                                                                                                                                                                                                                                                                                                                                                                                                                                              |                     |                                                     |
| How many correct subtractions did the participant make?                                                                                                                                                                                                                                                                                                                                                                                                                                                                                                                                                                                                                                                                                                          |                     |                                                     |
| <b>CLINICIAN NOTES:</b> This item is scored out of 3 points. Give no (0) points for no correct subtractions, 1 point for one correct subtraction, 2 points for two-to-three correct subtractions, and 3 points if the participant successfully makes four or five correct subtractions. Count each correct subtraction of 7 beginning at 100. Each subtraction is evaluated independently; that is, if the participant responds with an incorrect number but continues to correctly subtract 7 from it, give a point for each correct subtraction. For example, a participant may respond “92 – 85 – 78 – 71 – 64” where the “92” is incorrect, but all subsequent numbers are subtracted correctly. This is one error and the item would be given a score of 3. |                     |                                                     |
| <b>CODE ONLY ONE RESPONSE</b>                                                                                                                                                                                                                                                                                                                                                                                                                                                                                                                                                                                                                                                                                                                                    |                     |                                                     |
| ZERO                                                                                                                                                                                                                                                                                                                                                                                                                                                                                                                                                                                                                                                                                                                                                             | 0                   | Zero                                                |
| ONE                                                                                                                                                                                                                                                                                                                                                                                                                                                                                                                                                                                                                                                                                                                                                              | 1                   | One                                                 |
| TWO_THREE                                                                                                                                                                                                                                                                                                                                                                                                                                                                                                                                                                                                                                                                                                                                                        | 2                   | Two or three                                        |
| FOUR_FIVE                                                                                                                                                                                                                                                                                                                                                                                                                                                                                                                                                                                                                                                                                                                                                        | 3                   | Four or five                                        |
| REFUSED                                                                                                                                                                                                                                                                                                                                                                                                                                                                                                                                                                                                                                                                                                                                                          | 9                   | <b>[DO NOT READ]</b> Participant refused to do task |

## 7. Sentence repetition:

**Administration:** The examiner gives the following instructions: “I am going to read you a sentence. Repeat it after me, exactly as I say it [pause]: I only know that John is the one to help today.”. Following the response, say: “Now I am going to read you another sentence. Repeat it after me, exactly as I say it [pause]: The cat always hid under the couch when dogs were in the room”.

|                                                                                                                                                                                                                                                            |               |                                                     |
|------------------------------------------------------------------------------------------------------------------------------------------------------------------------------------------------------------------------------------------------------------|---------------|-----------------------------------------------------|
| MOC_12                                                                                                                                                                                                                                                     | MOC_REPET_MSP |                                                     |
| <b>[ALWAYS ASK]</b>                                                                                                                                                                                                                                        |               |                                                     |
| How many of the sentences did the participant correctly repeat?                                                                                                                                                                                            |               |                                                     |
| <b>CLINICIAN NOTES:</b> Repetition must be exact. Be alert for errors that are omissions (e.g., omitting "only", "always") and substitutions/additions (e.g., "John is the one who helped today;" substituting "hides" for "hid", altering plurals, etc.). |               |                                                     |
| <b>CODE ONLY ONE RESPONSE</b>                                                                                                                                                                                                                              |               |                                                     |
| ZERO                                                                                                                                                                                                                                                       | 0             | Zero                                                |
| ONE                                                                                                                                                                                                                                                        | 1             | One                                                 |
| TWO                                                                                                                                                                                                                                                        | 2             | Two                                                 |
| REFUSED                                                                                                                                                                                                                                                    | 9             | <b>[DO NOT READ]</b> Participant refused to do task |

## 8. Verbal fluency:

**Administration:** The examiner gives the following instruction: “Tell me as many words as you can think of that begin with a certain letter of the alphabet that I will tell you in a moment. You can say any kind of word you want, except for proper nouns (like Bob or Boston), numbers, or words that begin with the same sound but have a different suffix, for example, love, lover, loving. I will tell you to stop after one minute. Are you ready? [Pause] Now, tell me as many words as you can think of that begin with the letter F. [time for 60 sec]. Stop.”

|                                                   |                |                                                     |
|---------------------------------------------------|----------------|-----------------------------------------------------|
| MOC_13                                            | MOC_WORDSF_MSP |                                                     |
| <b>[ALWAYS ASK]</b>                               |                |                                                     |
| Please record the words that the participant says |                |                                                     |
|                                                   |                |                                                     |
| REFUSED                                           | 9              | <b>[DO NOT READ]</b> Participant refused to do task |

|                                                                                      |                   |                                              |
|--------------------------------------------------------------------------------------|-------------------|----------------------------------------------|
| MOC_14                                                                               | MOC_WORDSFNUM_MSP |                                              |
| [ASK IF MOC_WORDSF ≠ REFUSED ]                                                       |                   |                                              |
| How many words did the participant say in one minute that begin with the letter “F”? |                   |                                              |
| <b>CODE ONLY ONE RESPONSE</b>                                                        |                   |                                              |
| 10_LESS                                                                              | 00                | Less than 11 words                           |
| 11_MORE                                                                              | 01                | 11 or more words                             |
| REFUSED                                                                              | 99                | [DO NOT READ] Participant refused to do task |

### 9. Abstraction:

**Administration:** The examiner asks the subject to explain what each pair of words has in common, starting with the example: “*Tell me how an orange and a banana are alike*”. If the subject answers in a concrete manner, then say only one additional time: “*Tell me another way in which those items are alike*”. If the subject does not give the appropriate response (fruit), say, “*Yes, and they are also both fruit.*” Do not give any additional instructions or clarification. After the practice trial, say: “*Now, tell me how a train and a bicycle are alike*”. Following the response, administer the second trial, saying: “*Now tell me how a ruler and a watch are alike*”. Do not give any additional instructions or prompts.

|                                                                                                                                                                                                                                                                                                                                                                                                                        |                 |                                              |
|------------------------------------------------------------------------------------------------------------------------------------------------------------------------------------------------------------------------------------------------------------------------------------------------------------------------------------------------------------------------------------------------------------------------|-----------------|----------------------------------------------|
| MOC_15                                                                                                                                                                                                                                                                                                                                                                                                                 | MOC_WORDSIM_MSP |                                              |
| [ALWAYS ASK]                                                                                                                                                                                                                                                                                                                                                                                                           |                 |                                              |
| How many combinations of words did the participant identify the similarity between?                                                                                                                                                                                                                                                                                                                                    |                 |                                              |
| <b>CLINICIAN NOTES:</b> Only the last two item pairs are scored. Give 1 point to each item pair correctly answered. The following responses are acceptable: Train-bicycle = means of transportation, means of travelling, you take trips in both; Ruler-watch = measuring instruments, used to measure. The following responses are not acceptable: Train-bicycle = they have wheels; Ruler-watch = they have numbers. |                 |                                              |
| <b>CODE ONLY ONE RESPONSE</b>                                                                                                                                                                                                                                                                                                                                                                                          |                 |                                              |
| NONE                                                                                                                                                                                                                                                                                                                                                                                                                   | 0               | None                                         |
| ONE                                                                                                                                                                                                                                                                                                                                                                                                                    | 1               | One                                          |
| TWO                                                                                                                                                                                                                                                                                                                                                                                                                    | 2               | Two                                          |
| REFUSED                                                                                                                                                                                                                                                                                                                                                                                                                | 9               | [DO NOT READ] Participant refused to do task |

**10. Delayed recall:**

**Administration:** The examiner gives the following instruction: "I read some words to you earlier, which I asked you to remember. Tell me as many of those words as you can remember."

|                                                                                           |              |                                                     |
|-------------------------------------------------------------------------------------------|--------------|-----------------------------------------------------|
| MOC_16                                                                                    | MOC_MEM3_MSP |                                                     |
| <b>[ALWAYS ASK]</b>                                                                       |              |                                                     |
| .Please record which words the participant is able to spontaneously recall.               |              |                                                     |
| <b>MULTIPLE RESPONSES ALLOWED (EXCEPT IF 96, OR 99 ARE SELECTED), CODE ALL THAT APPLY</b> |              |                                                     |
| FACE                                                                                      | 01           | Face                                                |
| VELVET                                                                                    | 02           | Velvet                                              |
| CHURCH                                                                                    | 03           | Church                                              |
| DAISY                                                                                     | 04           | Daisy                                               |
| RED                                                                                       | 05           | Red                                                 |
| NONE                                                                                      | 96           | Did not remember any of the words                   |
| REFUSED                                                                                   | 99           | <b>[DO NOT READ]</b> Participant refused to do task |

**10b. Delayed recall – optional component:**

**Administration:** Following the delayed free recall trial, prompt the subject with the semantic category cue provided below for any word not recalled. Prompt all non-recalled words in this manner.

| Word   | Category cue     |
|--------|------------------|
| Face   | Part of the body |
| Velvet | Type of fabric   |
| Church | Type of building |
| Daisy  | Type of flower   |
| Red    | A colour         |

|        |                 |
|--------|-----------------|
| MOC_17 | MOC_MISCUE1_MSP |
|--------|-----------------|

**[SKIP IF MOC\_MEM3\_MSP = FACE AND VELVET AND CHURCH AND DAISY AND RED]**

Please indicate which words the participant produces on this third trial.

**CLINICIAN NOTE:** Please select each word that the participant correctly recalled with the category cue provided. Do not select words that the participant correctly remembered spontaneously.

A cue is used for clinical information purposes only and can give the test interpreter additional information about the type of memory disorder. For memory deficits due to retrieval failures, performance can be improved with a cue. For memory deficits due to encoding failures, performance does not improve with a cue.

**MULTIPLE RESPONSES ALLOWED (EXCEPT IF 96 OR 99 ARE SELECTED), CODE ALL THAT APPLY**

|         |    |                                                     |
|---------|----|-----------------------------------------------------|
| FACE    | 01 | Face                                                |
| VELVET  | 02 | Velvet                                              |
| CHURCH  | 03 | Church                                              |
| DAISY   | 04 | Daisy                                               |
| RED     | 05 | Red                                                 |
| NONE    | 96 | Did not remember any of the words                   |
| REFUSED | 99 | <b>[DO NOT READ]</b> Participant refused to do task |

If the subject does not recall the word after the category cue, give him/her a multiple choice trial, using the following example instruction, "Which of the following words do you think it was, NOSE, FACE, or HAND?"

| Word   | Multiple choice cue      |
|--------|--------------------------|
| Face   | Nose, face, hand         |
| Velvet | Denim, cotton, velvet    |
| Church | Church, school, hospital |
| Daisy  | Rose, daisy, tulip       |
| Red    | Red, blue, green         |

**MOC\_18**

**MOC\_MISCUE2\_MSP**

**SKIP IF MOC\_MEM3\_MSP OR MOC\_MISCUE1\_MSP = FACE AND VELVET AND CHURCH AND DAISY AND RED]**



|                                                                                                                                                                                                                                |    |                                                     |
|--------------------------------------------------------------------------------------------------------------------------------------------------------------------------------------------------------------------------------|----|-----------------------------------------------------|
| Please indicate which words the participant produces on this third trial.                                                                                                                                                      |    |                                                     |
| <b>CLINICIAN NOTE:</b> Please select each word that the participant correctly recalled with the category cue provided. Do not select words that the participant correctly remembered spontaneously or using the category cues. |    |                                                     |
| <b>MULTIPLE RESPONSES ALLOWED (EXCEPT IF 96 OR 99 ARE SELECTED), CODE ALL THAT APPLY</b>                                                                                                                                       |    |                                                     |
| FACE                                                                                                                                                                                                                           | 01 | Face                                                |
| VELVET                                                                                                                                                                                                                         | 02 | Velvet                                              |
| CHURCH                                                                                                                                                                                                                         | 03 | Church                                              |
| DAISY                                                                                                                                                                                                                          | 04 | Daisy                                               |
| RED                                                                                                                                                                                                                            | 05 | Red                                                 |
| NONE                                                                                                                                                                                                                           | 96 | Did not remember any of the words                   |
| REFUSED                                                                                                                                                                                                                        | 99 | <b>[DO NOT READ]</b> Participant refused to do task |

**11. Orientation:**

**Administration:** The examiner gives the following instructions: “*Tell me the date today*”. If the subject does not give a complete answer, then prompt accordingly by saying: “*Tell me the [year, month, exact date, and day of the week].*” Then say: “*Now, tell me the name of this place, and which city it is in.*”

|                                                                                                                                                                                                                |                       |                                                                                   |
|----------------------------------------------------------------------------------------------------------------------------------------------------------------------------------------------------------------|-----------------------|-----------------------------------------------------------------------------------|
| <b>MOC_19</b>                                                                                                                                                                                                  | <b>MOC_ORIENT_MSP</b> |                                                                                   |
| <b>[ALWAYS ASK]</b>                                                                                                                                                                                            |                       |                                                                                   |
| Which of the following orientation features did the participant correctly identify?                                                                                                                            |                       |                                                                                   |
| <b>CLINICIAN NOTES:</b> The subject must tell the exact date and the exact place (name of hospital, clinic, office). No points are allocated if subject makes an error (even of one day) for the day and date. |                       |                                                                                   |
| <b>MULTIPLE RESPONSES ALLOWED (EXCEPT IF 96 OR 99 ARE SELECTED), CODE ALL THAT APPLY</b>                                                                                                                       |                       |                                                                                   |
| DATE                                                                                                                                                                                                           | 01                    | Date                                                                              |
| MONTH                                                                                                                                                                                                          | 02                    | Month                                                                             |
| YEAR                                                                                                                                                                                                           | 03                    | Year                                                                              |
| DAY                                                                                                                                                                                                            | 04                    | Day                                                                               |
| PLACE                                                                                                                                                                                                          | 05                    | Place                                                                             |
| CITY                                                                                                                                                                                                           | 06                    | City                                                                              |
| NONE                                                                                                                                                                                                           | 96                    | None – the participant did not correctly identify any of the orientation features |
| REFUSED                                                                                                                                                                                                        | 99                    | <b>[DO NOT READ]</b> Participant refused to do task                               |

|                                          |                            |  |
|------------------------------------------|----------------------------|--|
| <b>MOC_20</b>                            | <b>MOC_TOTALSCORE0_MSP</b> |  |
| <b>[CALCULATE IF MOC_SIGHT_MSP = NO]</b> |                            |  |

The Montreal Cognitive Assessment (MoCA) is scored out of a maximum of 30 points. A final total score of 26 and above is considered normal. Total score on the MoCA: 0

**CLINICIAN NOTES:** One point has been added for individuals who have 12 years or fewer of formal education.

[CALCULATED VARIABLE: MOC\_TRAIL + MOC\_CUBE + MOC\_CLOCKCON + MOC\_CLOCKNUM + MOC\_CLOCKHAND + MOC\_ANIMALS:ONE + MOC\_ANIMALS:TWO + MOC\_ANIMALS:TWO + MOC\_ANIMALS:THREE + MOC\_ANIMALS:THREE + MOC\_ANIMALS:THREE + MOC\_NUMFORW + MOC\_NUMBACK + MOC\_LETTER:YES + MOC\_SUBS:ONE + \$MOC\_SUBS:TWO\_THREE + MOC\_SUBS:TWO\_THREE + MOC\_SUBS:FOUR\_FIVE + MOC\_SUBS:FOUR\_FIVE + MOC\_SUBS:FOUR\_FIVE + MOC\_REPET:ONE + MOC\_REPET:TWO + MOC\_REPET:TWO + MOC\_WORDSFNUM:11\_MORE + MOC\_WORDSIM:ONE + MOC\_WORDSIM:TWO + MOC\_WORDSIM:TWO + MOC\_MEM3:FACE + MOC\_MEM3:VELVET + MOC\_MEM3:CHURCH + MOC\_MEM3:DAISY + MOC\_MEM3:RED + MOC\_ORIENT:DATE + MOC\_ORIENT:MONTH + MOC\_ORIENT:YEAR + MOC\_ORIENT:DAY + MOC\_ORIENT:PLACE + MOC\_ORIENT:CITY + 1 IF BASELINE EDUCATION WAS 12 YEARS OR LESS == 0]

VARIABLES MOC\_21 TO MOC\_51 SHOULD BE CALCULATED AS FOLLOWED:

**VARIABLE NAME:** MOC\_TOTALSCORE[NUMBER] SHOULD INCREASE SEQUENTIALLY FROM 1 TO 30.

**VARIABLE DESCRIPTION:** TOTAL SCORE ON MONTREAL COGNITIVE ASSESSMENT (MOCA): [NUMBER] SHOULD INCREASE SEQUENTIALLY FROM 1 TO 30.

**VARIABLE CALCULATION:** THE TOTAL SCORE THAT THE VARIABLE CALCULATION EQUALS SHOULD INCREASE SEQUENTIALLY FROM 1 TO 30

|                                                                                                                                                                                                                                                                                                                                                                                                                                                                                                                                                                                                                                                                                                                                                                                                                                                                                                                                                                                                 |                   |
|-------------------------------------------------------------------------------------------------------------------------------------------------------------------------------------------------------------------------------------------------------------------------------------------------------------------------------------------------------------------------------------------------------------------------------------------------------------------------------------------------------------------------------------------------------------------------------------------------------------------------------------------------------------------------------------------------------------------------------------------------------------------------------------------------------------------------------------------------------------------------------------------------------------------------------------------------------------------------------------------------|-------------------|
| MOC_52                                                                                                                                                                                                                                                                                                                                                                                                                                                                                                                                                                                                                                                                                                                                                                                                                                                                                                                                                                                          | MOC_TOTALMIS0_MSP |
| [CALCULATE IF MOC_SIGHT_MSP = NO]                                                                                                                                                                                                                                                                                                                                                                                                                                                                                                                                                                                                                                                                                                                                                                                                                                                                                                                                                               |                   |
| <b>CLINICIAN NOTES:</b> There were not any skipped items on the Montreal Cognitive Assessment (MoCA).                                                                                                                                                                                                                                                                                                                                                                                                                                                                                                                                                                                                                                                                                                                                                                                                                                                                                           |                   |
| [CALCULATED VARIABLE, (\$MOC_TRAIL.refuse()\$ ? 1 : 0) + (\$MOC_CUBE.refuse()\$ ? 1 : 0) + (\$MOC_CLOCKCON.refuse()\$ ? 1 : 0) + (\$MOC_CLOCKNUM.refuse()\$ ? 1 : 0) + \$MOC_CLOCKHAND.refuse()\$ ? 1 : 0) + (\$MOC_ANIMALS.refuse()\$ ? 1 : 0) + \$MOC_ANIMALS.refuse()\$ ? 1 : 0) + (\$MOC_ANIMALS.refuse()\$ ? 1 : 0) + (\$MOC_NUMFORW.refuse()\$ ? 1 : 0) + (\$MOC_NUMBACK.refuse()\$ ? 1 : 0) + (\$MOC_LETTER.refuse()\$ ? 1 : 0) + (\$MOC_SUBS.refuse()\$ ? 1 : 0) + (\$MOC_SUBS.refuse()\$ ? 1 : 0) + (\$MOC_SUBS.refuse()\$ ? 1 : 0) + (\$MOC_REPET.refuse()\$ ? 1 : 0) + (\$MOC_REPET.refuse()\$ ? 1 : 0) + (\$MOC_WORDSFNUM.refuse()\$ ? 1 : 0) + (\$MOC_WORDSIM.refuse()\$ ? 1 : 0) + (\$MOC_WORDSIM.refuse()\$ ? 1 : 0) + (\$MOC_MEM3.refuse()\$ ? 1 : 0) + (\$MOC_MEM3.refuse()\$ ? 1 : 0) + (\$MOC_MEM3.refuse()\$ ? 1 : 0) + (\$MOC_ORIENT.refuse()\$ ? 1 : 0) == 0] |                   |

|                                                                                                                                                                                                                                                                                                                                                               |                   |
|---------------------------------------------------------------------------------------------------------------------------------------------------------------------------------------------------------------------------------------------------------------------------------------------------------------------------------------------------------------|-------------------|
| MOC_53                                                                                                                                                                                                                                                                                                                                                        | MOC_TOTALMIS1_MSP |
| [CALCULATE IF MOC_SIGHT_MSP = NO]                                                                                                                                                                                                                                                                                                                             |                   |
| <b>CLINICIAN NOTES:</b> Not all components of the Montreal Cognitive Assessment (MoCA) may have been completed. This variable identifies the number of points out of the total score of 30 that the participant did not receive due to skipping tasks on the MoCA and should be considered when interpreting the total score of the MoCA. Number of points: 1 |                   |

[CALCULATED VARIABLE, (\$MOC\_TRAIL.refuse()\$ ? 1 : 0) + (\$MOC\_CUBE.refuse()\$ ? 1 : 0) + (\$MOC\_CLOCKCON.refuse()\$ ? 1 : 0) + (\$MOC\_CLOCKNUM.refuse()\$ ? 1 : 0) + \$MOC\_CLOCKHAND.refuse()\$ ? 1 : 0) + (\$MOC\_ANIMALS.refuse()\$ ? 1 : 0) + \$MOC\_ANIMALS.refuse()\$ ? 1 : 0) + (\$MOC\_ANIMALS.refuse()\$ ? 1 : 0) + (\$MOC\_NUMFORW.refuse()\$ ? 1 : 0) + (\$MOC\_NUMBACK.refuse()\$ ? 1 : 0) + (\$MOC\_LETTER.refuse()\$ ? 1 : 0) + (\$MOC\_SUBS.refuse()\$ ? 1 : 0) + (\$MOC\_SUBS.refuse()\$ ? 1 : 0) + (\$MOC\_SUBS.refuse()\$ ? 1 : 0) + (\$MOC\_REPET.refuse()\$ ? 1 : 0) + (\$MOC\_REPET.refuse()\$ ? 1 : 0) + (\$MOC\_WORDSFNUM.refuse()\$ ? 1 : 0) + (\$MOC\_WORDSIM.refuse()\$ ? 1 : 0) + (\$MOC\_WORDSIM.refuse()\$ ? 1 : 0) + (\$MOC\_MEM3.refuse()\$ ? 1 : 0) + (\$MOC\_ORIENT.refuse()\$ ? 1 : 0) == 1]

VARIABLES MOC\_54 TO MOC\_62 SHOULD BE CALCULATED AS FOLLOWED:

**VARIABLE NAME:** MOC\_TOTALMIS[NUMBER] SHOULD INCREASE SEQUENTIALLY FROM 2 TO 10 OR MORE.

**VARIABLE DESCRIPTION:** TOTAL NUMBER OF MISSING POINTS ON MONTREAL COGNITIVE ASSESSMENT (MOCA): [NUMBER] SHOULD INCREASE SEQUENTIALLY FROM 1 TO 10 OR MORE.

**VARIABLE CALCULATION:** THE TOTAL SCORE THAT THE VARIABLE CALCULATION EQUALS SHOULD INCREASE SEQUENTIALLY FROM 1 TO 10 OR MORE

|                                                                                                                                                                                                                                                                                                                                                                                                                                                                                                                                                                                       |                     |
|---------------------------------------------------------------------------------------------------------------------------------------------------------------------------------------------------------------------------------------------------------------------------------------------------------------------------------------------------------------------------------------------------------------------------------------------------------------------------------------------------------------------------------------------------------------------------------------|---------------------|
| MOC_63                                                                                                                                                                                                                                                                                                                                                                                                                                                                                                                                                                                | MOC_BLINDSCORE0_MSP |
| [CALCULATE IF MOC_SIGHT_MSP = YES]                                                                                                                                                                                                                                                                                                                                                                                                                                                                                                                                                    |                     |
| Total score on the Montreal Cognitive Assessment (MoCA) Blind version : 0                                                                                                                                                                                                                                                                                                                                                                                                                                                                                                             |                     |
| <b>CLINICIAN NOTES:</b> One point has been added for individuals who have 12 years or fewer of formal education, for a possible maximum of 22 points. A final total score of 18 and above is considered normal.                                                                                                                                                                                                                                                                                                                                                                       |                     |
| <b>[CALCULATED VARIABLE: MOC_NUMFORW + MOC_NUMBACK + MOC_LETTER:YES + MOC_SUBS:ONE + \$MOC_SUBS:TWO_THREE + MOC_SUBS:TWO_THREE + MOC_SUBS:FOUR_FIVE + MOC_SUBS:FOUR_FIVE + MOC_SUBS:FOUR_FIVE + MOC_REPET:ONE + MOC_REPET:TWO + MOC_REPET:TWO + MOC_WORDSFNUM:11_MORE + MOC_WORDSIM:ONE + MOC_WORDSIM:TWO + MOC_WORDSIM:TWO + MOC_MEM3:FACE + MOC_MEM3:VELVET + MOC_MEM3:CHURCH + MOC_MEM3:DAISY + MOC_MEM3:RED + MOC_ORIENT:DATE + MOC_ORIENT:MONTH + MOC_ORIENT:YEAR + MOC_ORIENT:DAY + MOC_ORIENT:PLACE + MOC_ORIENT:CITY + 1 IF BASELINE EDUCATION WAS 12 YEARS OR LESS == 0]</b> |                     |

VARIABLES MOC\_64 TO MOC\_86 SHOULD BE CALCULATED AS FOLLOWED:

**VARIABLE NAME:** MOC\_BLINDSCORE [NUMBER] SHOULD INCREASE SEQUENTIALLY FROM 1 TO 22.

**VARIABLE DESCRIPTION:** TOTAL SCORE ON MONTREAL COGNITIVE ASSESSMENT (MOCA) BLIND VERSION: [NUMBER] SHOULD INCREASE SEQUENTIALLY FROM 1 TO 22.

**VARIABLE CALCULATION:** THE TOTAL SCORE THAT THE VARIABLE CALCULATION EQUALS SHOULD INCREASE SEQUENTIALLY FROM 1 TO 22

|        |                   |
|--------|-------------------|
| MOC_87 | MOC_BLINDMIS0_MSP |
|--------|-------------------|

|                                                                                                                                                                                                                                                                                                                                                                                                                                                                                                                                                                                                                                                                                                                                                                    |
|--------------------------------------------------------------------------------------------------------------------------------------------------------------------------------------------------------------------------------------------------------------------------------------------------------------------------------------------------------------------------------------------------------------------------------------------------------------------------------------------------------------------------------------------------------------------------------------------------------------------------------------------------------------------------------------------------------------------------------------------------------------------|
| [CALCULATE IF MOC_SIGHT_MSP = YES]                                                                                                                                                                                                                                                                                                                                                                                                                                                                                                                                                                                                                                                                                                                                 |
| <b>CLINICIAN NOTES:</b> There were not any skipped items on the Montreal Cognitive Assessment (MoCA) Blind version..                                                                                                                                                                                                                                                                                                                                                                                                                                                                                                                                                                                                                                               |
| [CALCULATED VARIABLE, (\$MOC_NUMFORW.refuse()\$ ? 1 : 0) + (\$MOC_NUMBACK.refuse()\$ ? 1 : 0) + (\$MOC_LETTER.refuse()\$ ? 1 : 0) + (\$MOC_SUBS.refuse()\$ ? 1 : 0) + (\$MOC_SUBS.refuse()\$ ? 1 : 0) + (\$MOC_REPET.refuse()\$ ? 1 : 0) + (\$MOC_REPET.refuse()\$ ? 1 : 0) + (\$MOC_WORDSFNUM.refuse()\$ ? 1 : 0) + (\$MOC_WORDSIM.refuse()\$ ? 1 : 0) + (\$MOC_WORDSIM.refuse()\$ ? 1 : 0) + (\$MOC_MEM3.refuse()\$ ? 1 : 0) + (\$MOC_ORIENT.refuse()\$ ? 1 : 0) == 0] |

|                                                                                                                                                                                                                                                                                                                                                                                |                   |
|--------------------------------------------------------------------------------------------------------------------------------------------------------------------------------------------------------------------------------------------------------------------------------------------------------------------------------------------------------------------------------|-------------------|
| MOC_88                                                                                                                                                                                                                                                                                                                                                                         | MOC_BLINDMIS1_MSP |
| [CALCULATE IF MOC_SIGHT_MSP = YES]                                                                                                                                                                                                                                                                                                                                             |                   |
| <b>CLINICIAN NOTES:</b> Not all components of the Montreal Cognitive Assessment (MoCA) Blind version may have been completed. This variable identifies the number of points out of the total score of 22 that the participant did not receive due to skipping tasks on the MoCA-BLIND which is administered to participants with severe visual impairment. Number of points: 1 |                   |
| [CALCULATED VARIABLE, MOC_LETTER_MSP (REFUSED) + MOC_NUMFORW_MSP (REFUSED) + MOC_NUMBACK_MSP (REFUSED) + MOC_SUBS_MSP (REFUSED) + MOC_REPET_MSP (REFUSED) + MOC_WORDSFNUM_MSP (REFUSED), MOC_WORDSIM_MSP (REFUSED), MOC_MEM3_MSP (REFUSED), MOC_ORIENT_MSP (REFUSED)]                                                                                                          |                   |

**VARIABLES MOC\_89 TO MOC\_98 SHOULD BE CALCULATED AS FOLLOWED:**

**VARIABLE NAME:** MOC\_TOTALMIS[NUMBER] SHOULD INCREASE SEQUENTIALLY FROM 2 TO 10 OR MORE.  
**VARIABLE DESCRIPTION:** TOTAL NUMBER OF MISSING POINTS ON MONTREAL COGNITIVE ASSESSMENT (MOCA): [NUMBER] SHOULD INCREASE SEQUENTIALLY FROM 1 TO 10 OR MORE.  
**VARIABLE CALCULATION:** THE TOTAL SCORE THAT THE VARIABLE CALCULATION EQUALS SHOULD INCREASE SEQUENTIALLY FROM 1 TO 10 OR MORE

|                                                                                                                                                                                                                            |                   |
|----------------------------------------------------------------------------------------------------------------------------------------------------------------------------------------------------------------------------|-------------------|
| MOC_99                                                                                                                                                                                                                     | MOC_MISSCORE0_MSP |
| The Memory Score Index (MIS) is scored out of a maximum of 15. A score of 8 and above is considered normal. The participant’s score on the MIS is: 0                                                                       |                   |
| [CALCULATED VARIABLE, SUM OF (MOC_MEM3_MSP = FACE, VELVET, CHURCH, DAISY, AND/OR RED * 3) + (MOC_MISCUE1_MSP = FACE, VELVET, CHURCH, DAISY, AND/OR RED * 2) + (MOC_MISCUE2_MSP = FACE, VELVET, CHURCH, DAISY, AND/OR RED)] |                   |

**VARIABLES MOC\_100 TO MOC\_115 SHOULD BE CALCULATED AS FOLLOWED:**

**VARIABLE NAME:** MOC\_MISSCORE[NUMBER] SHOULD INCREASE SEQUENTIALLY FROM 1 TO 15.

**VARIABLE DESCRIPTION:** TOTAL SCORE MEMORY SCORE INDEX SHOULD INCREASE SEQUENTIALLY FROM 1 TO 15.

**VARIABLE CALCULATION:** THE TOTAL SCORE THAT THE VARIABLE CALCULATION EQUALS SHOULD INCREASE SEQUENTIALLY FROM 1 TO 15

|                                                                                                                                                                                                                          |                            |
|--------------------------------------------------------------------------------------------------------------------------------------------------------------------------------------------------------------------------|----------------------------|
| <b>MOC_116</b>                                                                                                                                                                                                           | <b>MOC_MISSCOREMIS_MSP</b> |
| <b>CLINICIAN NOTES:</b> Not all components of the Montreal Cognitive Assessment (MoCA) Memory Impairment Section (MIS) were completed. Please take this into consideration when interpreting the total score of the MIS. |                            |
| <b>[CALCULATED VARIABLE, MOC_MEM3_MSP (REFUSED) OR MOC_MISCUE1_MSP (REFUSED) OR MOC_MISCUE2_MSP (REFUSED)]</b>                                                                                                           |                            |

|                                                                                                                                                                                                                        |                      |
|------------------------------------------------------------------------------------------------------------------------------------------------------------------------------------------------------------------------|----------------------|
| <b>MOC_117</b>                                                                                                                                                                                                         | <b>MOC_NOTES_MSP</b> |
| <b>[ALWAYS ASK]</b>                                                                                                                                                                                                    |                      |
| Do you have any additional notes to include for this module? For example, were there any issues with the testing environment that should be taken into account when interpreting the results of the cognitive testing? |                      |
| YES                                                                                                                                                                                                                    | 1 Yes                |
| NO                                                                                                                                                                                                                     | 2 No                 |

|                                                                                         |                         |
|-----------------------------------------------------------------------------------------|-------------------------|
| <b>MOC_118</b>                                                                          | <b>MOC_NOTES_SP_MSP</b> |
| <b>[ASK IF MOC_NOTES_MSP = YES]</b>                                                     |                         |
| <b>CLINICIAN NOTE:</b> Please do not enter any identifying information in this section. |                         |
| Please provide any notes below:                                                         |                         |

**MOC\_END**

## Preliminary Diagnosis of Neurocognitive Disorder (NCD)

|                 |                                                                                                                                                                                                                                                                                          |
|-----------------|------------------------------------------------------------------------------------------------------------------------------------------------------------------------------------------------------------------------------------------------------------------------------------------|
| <b>Overview</b> | Please use this module to document your preliminary diagnosis of the participant's cognitive status based on the clinical assessment and informant interview. This module does not contain questions related to planning the care of individuals diagnosed with neurocognitive disorder. |
|-----------------|------------------------------------------------------------------------------------------------------------------------------------------------------------------------------------------------------------------------------------------------------------------------------------------|

|                                                                                                                                                                                                                                                                                                    |                    |                                                                                                                                                                                                                                         |
|----------------------------------------------------------------------------------------------------------------------------------------------------------------------------------------------------------------------------------------------------------------------------------------------------|--------------------|-----------------------------------------------------------------------------------------------------------------------------------------------------------------------------------------------------------------------------------------|
| <b>NCD_1</b>                                                                                                                                                                                                                                                                                       | <b>NCD_DIA_MSP</b> |                                                                                                                                                                                                                                         |
| <b>[ALWAYS ASK]</b>                                                                                                                                                                                                                                                                                |                    |                                                                                                                                                                                                                                         |
| Based on the clinical evaluation and informant interview, what is your diagnosis of the participant?                                                                                                                                                                                               |                    |                                                                                                                                                                                                                                         |
| <b>CLINICIAN NOTE:</b> The category of "no significant cognitive concerns" also includes participants without any cognitive complaints that performed poorly on the Montreal Cognitive Assessment (MoCA) if confounders such as language or education are thought to explain the poor performance. |                    |                                                                                                                                                                                                                                         |
| <b>CODE ONLY ONE RESPONSE</b>                                                                                                                                                                                                                                                                      |                    |                                                                                                                                                                                                                                         |
| NORMAL                                                                                                                                                                                                                                                                                             | 1                  | No significant cognitive concerns                                                                                                                                                                                                       |
| SUB                                                                                                                                                                                                                                                                                                | 2                  | Normal cognition but with subjective cognitive decline (self-reported confusion or memory problems happening more often and getting worse over last year but not meeting the criteria for either mild or major neurocognitive disorder) |
| DELIRIUM                                                                                                                                                                                                                                                                                           | 3                  | Delirium                                                                                                                                                                                                                                |
| MILD                                                                                                                                                                                                                                                                                               | 4                  | Mild neurocognitive disorder                                                                                                                                                                                                            |
| MAJOR                                                                                                                                                                                                                                                                                              | 5                  | Major neurocognitive disorder                                                                                                                                                                                                           |

|                                                                                                                                                                                         |                     |                                    |
|-----------------------------------------------------------------------------------------------------------------------------------------------------------------------------------------|---------------------|------------------------------------|
| <b>NCD_2</b>                                                                                                                                                                            | <b>NCD_CONF_MSP</b> |                                    |
| <b>[ALWAYS ASK]</b>                                                                                                                                                                     |                     |                                    |
| How confident are you in your diagnosis? Please rate on an 11-point scale (0-10; with the anchors of 0, indicating the lowest confidence rating, and 10, the highest confidence rating) |                     |                                    |
| NUMBER                                                                                                                                                                                  | Number              | _____ <b>[MASK: MIN=0, MAX=10]</b> |

|                                                                                   |                    |                                            |
|-----------------------------------------------------------------------------------|--------------------|--------------------------------------------|
| <b>NCD_3</b>                                                                      | <b>NCD_DOM_MSP</b> |                                            |
| <b>[ASK IF NCD_DIA_MSP = SUB, MILD ,OR MAJOR]</b>                                 |                    |                                            |
| What cognitive domains have been impacted by cognitive decline?                   |                    |                                            |
| <b>MULTIPLE RESPONSES ALLOWED (EXCEPT IF 96 IS SELECTED), CODE ALL THAT APPLY</b> |                    |                                            |
| AT                                                                                | 01                 | Attention                                  |
| EF                                                                                | 02                 | Executive function                         |
| LM                                                                                | 03                 | Learning and memory                        |
| LG_                                                                               | 04                 | Language                                   |
| PC                                                                                | 05                 | Perceptual/motor                           |
| SC                                                                                | 06                 | Social cognition                           |
| NONE                                                                              | 96                 | No cognitive domains appear to be impacted |

|                                                                                            |                     |                                                 |
|--------------------------------------------------------------------------------------------|---------------------|-------------------------------------------------|
| <b>NCD_4</b>                                                                               | <b>NCD_INFO_MSP</b> |                                                 |
| <b>[ALWAYS ASK]</b>                                                                        |                     |                                                 |
| What additional information or resources would increase your confidence in your diagnosis? |                     |                                                 |
| <b>MULTIPLE RESPONSES ALLOWED, CODE ALL THAT APPLY</b>                                     |                     |                                                 |
| NONE                                                                                       | 1                   | None                                            |
| LAB                                                                                        | 2                   | Laboratory investigations                       |
| IMG                                                                                        | 3                   | Neuroimaging                                    |
| REF                                                                                        | 4                   | Referral to a consultant                        |
| TIM                                                                                        | 5                   | Opportunity to follow the participant over time |
| OTSP                                                                                       | 7                   | Other (please specify: _____)                   |

|                                                                                                      |                     |                                                                     |
|------------------------------------------------------------------------------------------------------|---------------------|---------------------------------------------------------------------|
| <b>NCD_5</b>                                                                                         | <b>NCD_TYPE_MSP</b> |                                                                     |
| <b>[ASK IF NCD_DIA_MSP = MILD OR MAJOR]</b>                                                          |                     |                                                                     |
| Based on the clinical evaluation and informant interview, what is your diagnosis of the participant? |                     |                                                                     |
| <b>CODE ONLY ONE RESPONSE</b>                                                                        |                     |                                                                     |
| ALZ                                                                                                  | 1                   | Alzheimer's Disease                                                 |
| LWY                                                                                                  | 2                   | Lewy Body Disease                                                   |
| PKD                                                                                                  | 3                   | Parkinson's Disease                                                 |
| VSC                                                                                                  | 4                   | Vascular Cognitive Impairment                                       |
| FRT                                                                                                  | 5                   | Frontotemporal Degeneration                                         |
| TBI                                                                                                  | 6                   | Traumatic Brain Injury (Including Chronic Traumatic Encephalopathy) |
| MLT                                                                                                  | 7                   | Multiple (or Mixed) etiologies                                      |
| OTSP                                                                                                 | 8                   | Other (please specify: _____)                                       |
| UNK                                                                                                  | 9                   | Unknown                                                             |

|                                                                                                                                                                                                                                                                 |                        |                                    |
|-----------------------------------------------------------------------------------------------------------------------------------------------------------------------------------------------------------------------------------------------------------------|------------------------|------------------------------------|
| <b>NCD_6</b>                                                                                                                                                                                                                                                    | <b>NCD_TYPCONF_MSP</b> |                                    |
| <b>[ASK IF NCD_DIA_MSP = MILD OR MAJOR]</b>                                                                                                                                                                                                                     |                        |                                    |
| How confident are you in your diagnosis of the underlying cause of the mild or major neurocognitive disorder?<br>Please rate on an 11-point scale (0-10; with the anchors of 0, indicating the lowest confidence rating, and 10, the highest confidence rating) |                        |                                    |
| NUMBER                                                                                                                                                                                                                                                          | Number                 | _____ <b>[MASK: MIN=0, MAX=10]</b> |

|                                                                                            |                        |                                                 |
|--------------------------------------------------------------------------------------------|------------------------|-------------------------------------------------|
| <b>NCD_7</b>                                                                               | <b>NCD_TYPIINF_MSP</b> |                                                 |
| <b>[ASK IF NCD_DIA_MSP = MILD OR MAJOR]</b>                                                |                        |                                                 |
| What additional information or resources would increase your confidence in your diagnosis? |                        |                                                 |
| <b>MULTIPLE RESPONSES ALLOWED, CODE ALL THAT APPLY</b>                                     |                        |                                                 |
| NONE                                                                                       | 1                      | None                                            |
| LAB                                                                                        | 2                      | Laboratory investigations                       |
| IMG                                                                                        | 3                      | Neuroimaging                                    |
| REF                                                                                        | 4                      | Referral to a consultant                        |
| TIM                                                                                        | 5                      | Opportunity to follow the participant over time |
| OTSP                                                                                       | 7                      | Other (please specify: _____)                   |



|                                                                                                                                                                                                                                       |                      |
|---------------------------------------------------------------------------------------------------------------------------------------------------------------------------------------------------------------------------------------|----------------------|
| <b>NCD_8</b>                                                                                                                                                                                                                          | <b>NCD_NOTES_MSP</b> |
| <b>[ALWAYS ASK]</b>                                                                                                                                                                                                                   |                      |
| Do you have any additional notes? For example, are there any other details regarding your clinical assessment with the participant that you have not previously recorded that impacted the diagnosis you provided to the participant? |                      |
| YES                                                                                                                                                                                                                                   | 1 Yes                |
| NO                                                                                                                                                                                                                                    | 2 No                 |

|                                                                                         |                         |
|-----------------------------------------------------------------------------------------|-------------------------|
| <b>NCD_9</b>                                                                            | <b>NCD_NOTES_SP_MSP</b> |
| <b>[ASK IF NCD_NOTES_MSP = YES]</b>                                                     |                         |
| <b>CLINICIAN NOTE:</b> Please do not enter any identifying information in this section. |                         |
| Please provide any notes below:                                                         |                         |

|                                                                                                                                                                                                                                                                                                |                        |
|------------------------------------------------------------------------------------------------------------------------------------------------------------------------------------------------------------------------------------------------------------------------------------------------|------------------------|
| <b>NCD_10</b>                                                                                                                                                                                                                                                                                  | <b>NCD_LETTER1_MSP</b> |
| <b>ALWAYS ASK</b>                                                                                                                                                                                                                                                                              |                        |
| <b>DO NOT READ:</b> If your clinical assessment of the participant indicates that there may be a concern about the participant's memory, please fill out the CLSA Memory Study Participant Letter Template – Potential Cognitive Concerns template with the participant's name and MoCA score. |                        |
| If your clinical assessment of the participant indicates that there are not any concerns about the participant's memory, please fill out the CLSA Memory Study Participant Letter Template – No Cognitive Concerns template with the participant's name and MoCA score.                        |                        |
| Give the letter to the participant and verbally discuss the content.                                                                                                                                                                                                                           |                        |

|                                             |                        |
|---------------------------------------------|------------------------|
| <b>NCD_11</b>                               | <b>NCD_LETTER2_MSP</b> |
| <b>ALWAYS ASK</b>                           |                        |
| Did you give the letter to the participant? |                        |
| YES                                         | 1 Yes                  |
| NO                                          | 2 No                   |

|                                                           |                        |
|-----------------------------------------------------------|------------------------|
| <b>NCD_12</b>                                             | <b>NCD_LETTER3_MSP</b> |
| <b>[ASK IF NCD_LETTER_MSP = NO]</b>                       |                        |
| Why did you not give the letter to the participant? _____ |                        |

**NCD\_END**

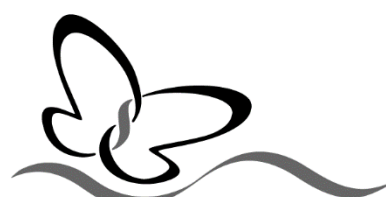

**clsa élcv**

Canadian Longitudinal Study on Aging

Étude longitudinale canadienne sur le vieillissement

# **Supplementary Appendix 6**

## **- Informant Questionnaire**

### **(Canadian Longitudinal Study on Aging (CLSA) Memory Study)**

**v1.1, 2022 October 12**

## Table of Contents

|                                                      |    |
|------------------------------------------------------|----|
| Relationship to Participant (INF) .....              | 1  |
| AD8 Dementia Screening Interview (AD8).....          | 2  |
| Medical History (MED) .....                          | 8  |
| Basic Activities of Daily Living (ADL) .....         | 13 |
| Instrumental Activities of Daily Living (IADL) ..... | 20 |
| Transportation (TRA) .....                           | 27 |
| Mild Behavioural Impairment Checklist (MBI) .....    | 29 |

Peer review only



## Relationship to Participant (INF)

|                 |                                                                                                                                                                                                                                   |
|-----------------|-----------------------------------------------------------------------------------------------------------------------------------------------------------------------------------------------------------------------------------|
| <b>Overview</b> | This questionnaire will be completed by an informant, a family member or friend who knows the participant well and can answer questions regarding the participant's medical history, functional abilities, and overall behaviour. |
|-----------------|-----------------------------------------------------------------------------------------------------------------------------------------------------------------------------------------------------------------------------------|

First, I would like to ask you about your relationship with @first\_name@.

|                                              |                    |                                             |
|----------------------------------------------|--------------------|---------------------------------------------|
| <b>REL_1</b>                                 | <b>INF_REL_MSI</b> |                                             |
| <b>[ALWAYS ASK]</b>                          |                    |                                             |
| What is your relationship with @first_name@? |                    |                                             |
| <b>CODE ONLY ONE RESPONSE</b>                |                    |                                             |
| PARTNER                                      | 1                  | Spouse/partner                              |
| CHILD                                        | 2                  | Child                                       |
| SIBLING                                      | 3                  | Sibling                                     |
| FRIEND                                       | 4                  | Friend                                      |
| OT_SP                                        | 5                  | Other, specify: _____                       |
| DK_NA                                        | 8                  | <b>[DO NOT READ]</b> Don't know / No answer |
| REFUSED                                      | 9                  | <b>[DO NOT READ]</b> Refused                |

|                                                            |                       |                                             |
|------------------------------------------------------------|-----------------------|---------------------------------------------|
| <b>REL_2</b>                                               | <b>INF_GENDER_MSI</b> |                                             |
| <b>[ALWAYS ASK]</b>                                        |                       |                                             |
| What pronoun should we use when referring to @first_name@? |                       |                                             |
| <b>CODE ONLY ONE RESPONSE</b>                              |                       |                                             |
| HIM                                                        | 1                     | He/him/his                                  |
| HER                                                        | 2                     | She/her/hers                                |
| THEM                                                       | 3                     | They/them/theirs                            |
| OT_SP                                                      | 5                     | Other, specify: _____                       |
| DK_NA                                                      | 8                     | <b>[DO NOT READ]</b> Don't know / No answer |
| REFUSED                                                    | 9                     | <b>[DO NOT READ]</b> Refused                |

**REL\_END**



## AD8 Dementia Screening Interview (AD8)

Reprinted with permission. Copyright 2005. The Eight-item Informant Interview to Differentiate Aging and Dementia is a copyrighted instrument of Washington University, St. Louis, Missouri. All Rights Reserved. Please refer to Galvin JE et al, The AD8, a brief informant interview to detect dementia, *Neurology* 2005; 65:559-564,

|                 |                                                                                                                                                                                                                                                                                                                                                                                                                                                                                                                                                                                                                                                                                                                                                                                                                                     |
|-----------------|-------------------------------------------------------------------------------------------------------------------------------------------------------------------------------------------------------------------------------------------------------------------------------------------------------------------------------------------------------------------------------------------------------------------------------------------------------------------------------------------------------------------------------------------------------------------------------------------------------------------------------------------------------------------------------------------------------------------------------------------------------------------------------------------------------------------------------------|
| <b>Overview</b> | <p>The Eight-item Informant Interview to Differentiate Aging and Dementia (AD8) was designed as a screening tool to identify early cognitive changes associated with many common subtypes of dementia including Alzheimer's Disease, vascular dementia, Lewy body dementia, and frontotemporal dementia.</p> <p>The informant should specifically be asked to rate changes in the participant's ability for each of the items, without attributing causality. If read aloud to the respondent, it is important for the interviewer to carefully read the phrase <u>as worded</u> and give emphasis to note changes due to cognitive problems (not physical problems). There should be a one second delay between individual items.</p> <p>There is no specific timeframe for change required to be used for this questionnaire.</p> |
|-----------------|-------------------------------------------------------------------------------------------------------------------------------------------------------------------------------------------------------------------------------------------------------------------------------------------------------------------------------------------------------------------------------------------------------------------------------------------------------------------------------------------------------------------------------------------------------------------------------------------------------------------------------------------------------------------------------------------------------------------------------------------------------------------------------------------------------------------------------------|

For the next few questions, please think about @first\_name@'s cognitive abilities in regard to thinking and memory problems.

For each question, please respond "yes" if you have noticed a change and "no" if you have not noticed a change in @first\_name@ over the past several years.

|                                                                                                                |                  |                                             |
|----------------------------------------------------------------------------------------------------------------|------------------|---------------------------------------------|
| <b>AD8_1</b>                                                                                                   | <b>AD8_1_MSI</b> |                                             |
| <b>[ALWAYS ASK]</b>                                                                                            |                  |                                             |
| Problems with judgment (e.g., problems with making decisions, bad financial decisions, problems with thinking) |                  |                                             |
| YES                                                                                                            | 1                | Yes                                         |
| NO                                                                                                             | 2                | No                                          |
| DK_NA                                                                                                          | 8                | <b>[DO NOT READ]</b> Don't know / No answer |
| REFUSED                                                                                                        | 9                | <b>[DO NOT READ]</b> Refused                |

|              |                  |
|--------------|------------------|
| <b>AD8_2</b> | <b>AD8_2_MSI</b> |
|--------------|------------------|



**CLSA Memory Study Informant Questionnaire**  
v1.1, 2022 October 12

|                                     |   |                                             |
|-------------------------------------|---|---------------------------------------------|
| <b>[ALWAYS ASK]</b>                 |   |                                             |
| Less interest in hobbies/activities |   |                                             |
| YES                                 | 1 | Yes                                         |
| NO                                  | 2 | No                                          |
| DK_NA                               | 8 | <b>[DO NOT READ]</b> Don't know / No answer |
| REFUSED                             | 9 | <b>[DO NOT READ]</b> Refused                |

|                                                                           |                  |                                             |
|---------------------------------------------------------------------------|------------------|---------------------------------------------|
| <b>AD8_3</b>                                                              | <b>AD8_3_MSI</b> |                                             |
| <b>[ALWAYS ASK]</b>                                                       |                  |                                             |
| Repeats the same things over and over (questions, stories, or statements) |                  |                                             |
| YES                                                                       | 1                | Yes                                         |
| NO                                                                        | 2                | No                                          |
| DK_NA                                                                     | 8                | <b>[DO NOT READ]</b> Don't know / No answer |
| REFUSED                                                                   | 9                | <b>[DO NOT READ]</b> Refused                |

|                                                                                                           |                  |                                             |
|-----------------------------------------------------------------------------------------------------------|------------------|---------------------------------------------|
| <b>AD8_4</b>                                                                                              | <b>AD8_4_MSI</b> |                                             |
| <b>[ALWAYS ASK]</b>                                                                                       |                  |                                             |
| Trouble learning how to use a tool, appliance, or gadget (e.g., VCR, computer, microwave, remote control) |                  |                                             |
| YES                                                                                                       | 1                | Yes                                         |
| NO                                                                                                        | 2                | No                                          |
| DK_NA                                                                                                     | 8                | <b>[DO NOT READ]</b> Don't know / No answer |
| REFUSED                                                                                                   | 9                | <b>[DO NOT READ]</b> Refused                |

|                               |                  |                                             |
|-------------------------------|------------------|---------------------------------------------|
| <b>AD8_5</b>                  | <b>AD8_5_MSI</b> |                                             |
| <b>[ALWAYS ASK]</b>           |                  |                                             |
| Forgets correct month or year |                  |                                             |
| YES                           | 1                | Yes                                         |
| NO                            | 2                | No                                          |
| DK_NA                         | 8                | <b>[DO NOT READ]</b> Don't know / No answer |
| REFUSED                       | 9                | <b>[DO NOT READ]</b> Refused                |

|              |                  |  |
|--------------|------------------|--|
| <b>AD8_6</b> | <b>AD8_6_MSI</b> |  |
|--------------|------------------|--|



**CLSA Memory Study Informant Questionnaire**  
v1.1, 2022 October 12

|                                                                                                         |   |                                             |
|---------------------------------------------------------------------------------------------------------|---|---------------------------------------------|
| <b>[ALWAYS ASK]</b>                                                                                     |   |                                             |
| Trouble handling complicated financial affairs (e.g., balancing check book, income taxes, paying bills) |   |                                             |
| YES                                                                                                     | 1 | Yes                                         |
| NO                                                                                                      | 2 | No                                          |
| DK_NA                                                                                                   | 8 | <b>[DO NOT READ]</b> Don't know / No answer |
| REFUSED                                                                                                 | 9 | <b>[DO NOT READ]</b> Refused                |

|                                  |                  |                                             |
|----------------------------------|------------------|---------------------------------------------|
| <b>AD8_7</b>                     | <b>AD8_7_MSI</b> |                                             |
| <b>[ALWAYS ASK]</b>              |                  |                                             |
| Trouble remembering appointments |                  |                                             |
| YES                              | 1                | Yes                                         |
| NO                               | 2                | No                                          |
| DK_NA                            | 8                | <b>[DO NOT READ]</b> Don't know / No answer |
| REFUSED                          | 9                | <b>[DO NOT READ]</b> Refused                |

|                                                   |                  |                                             |
|---------------------------------------------------|------------------|---------------------------------------------|
| <b>AD8_8</b>                                      | <b>AD8_8_MSI</b> |                                             |
| <b>[ALWAYS ASK]</b>                               |                  |                                             |
| <b>Daily</b> problems with thinking and/or memory |                  |                                             |
| YES                                               | 1                | Yes                                         |
| NO                                                | 2                | No                                          |
| DK_NA                                             | 8                | <b>[DO NOT READ]</b> Don't know / No answer |
| REFUSED                                           | 9                | <b>[DO NOT READ]</b> Refused                |

|                                                                                                       |                            |  |
|-------------------------------------------------------------------------------------------------------|----------------------------|--|
| <b>AD8_9</b>                                                                                          | <b>AD8_TOTALSCORE0_MSI</b> |  |
| <b>[ASK IF SUM OF "YES" RESPONSES FOR AD8_1, AD8_2, AD8_3, AD8_4, AD8_5, AD8_6, AD8_7, AD8_8 = 0]</b> |                            |  |
| <b>Score on the AD8 Dementia Screening Interview: 0</b>                                               |                            |  |

|                                                                                                       |                            |  |
|-------------------------------------------------------------------------------------------------------|----------------------------|--|
| <b>AD8_10</b>                                                                                         | <b>AD8_TOTALSCORE1_MSI</b> |  |
| <b>[ASK IF SUM OF "YES" RESPONSES FOR AD8_1, AD8_2, AD8_3, AD8_4, AD8_5, AD8_6, AD8_7, AD8_8 = 1]</b> |                            |  |



**CLSA Memory Study Informant Questionnaire**  
v1.1, 2022 October 12

Score on the AD8 Dementia Screening Interview: 1

|        |                     |
|--------|---------------------|
| AD8_11 | AD8_TOTALSCORE2_MSI |
|--------|---------------------|

[ASK IF SUM OF "YES" RESPONSES FOR AD8\_1, AD8\_2, AD8\_3, AD8\_4, AD8\_5, AD8\_6, AD8\_7, AD8\_8 = 2]

Score on the AD8 Dementia Screening Interview: 2

|        |                     |
|--------|---------------------|
| AD8_12 | AD8_TOTALSCORE3_MSI |
|--------|---------------------|

[ASK IF SUM OF "YES" RESPONSES FOR AD8\_1, AD8\_2, AD8\_3, AD8\_4, AD8\_5, AD8\_6, AD8\_7, AD8\_8 = 3]

Score on the AD8 Dementia Screening Interview: 3

|        |                     |
|--------|---------------------|
| AD8_13 | AD8_TOTALSCORE4_MSI |
|--------|---------------------|

[ASK IF SUM OF "YES" RESPONSES FOR AD8\_1, AD8\_2, AD8\_3, AD8\_4, AD8\_5, AD8\_6, AD8\_7, AD8\_8 = 4]

Score on the AD8 Dementia Screening Interview: 4

|        |                     |
|--------|---------------------|
| AD8_14 | AD8_TOTALSCORE5_MSI |
|--------|---------------------|

[ASK IF SUM OF "YES" RESPONSES FOR AD8\_1, AD8\_2, AD8\_3, AD8\_4, AD8\_5, AD8\_6, AD8\_7, AD8\_8 = 5]

Score on the AD8 Dementia Screening Interview: 5

|        |                     |
|--------|---------------------|
| AD8_15 | AD8_TOTALSCORE6_MSI |
|--------|---------------------|

[ASK IF SUM OF "YES" RESPONSES FOR AD8\_1, AD8\_2, AD8\_3, AD8\_4, AD8\_5, AD8\_6, AD8\_7, AD8\_8 = 6]

Score on the AD8 Dementia Screening Interview: 6

|        |                     |
|--------|---------------------|
| AD8_16 | AD8_TOTALSCORE7_MSI |
|--------|---------------------|

[ASK IF SUM OF "YES" RESPONSES FOR AD8\_1, AD8\_2, AD8\_3, AD8\_4, AD8\_5, AD8\_6, AD8\_7, AD8\_8 = 7]





Score on the AD8 Dementia Screening Interview: 7

|        |                     |
|--------|---------------------|
| AD8_17 | AD8_TOTALSCORE8_MSI |
|--------|---------------------|

[ASK IF SUM OF "YES" RESPONSES FOR AD8\_1, AD8\_2, AD8\_3, AD8\_4, AD8\_5, AD8\_6, AD8\_7, AD8\_8 = 8]

Score on the AD8 Dementia Screening Interview: 8

This variable identifies the number of items that were not completed on the Eight-item Informant Interview to Differentiate Aging and Dementia (AD8) questionnaire and should be considered when interpreting the total score of the AD8.

|        |                   |
|--------|-------------------|
| AD8_18 | AD8_TOTALMIS0_MSI |
|--------|-------------------|

[ASK IF SUM OF "DON'T KNOW/NO ANSWER OR REFUSED" RESPONSES FOR AD8\_1, AD8\_2, AD8\_3, AD8\_4, AD8\_5, AD8\_6, AD8\_7, AD8\_8 = 0]

Number of missed questions on the AD8 Dementia Screening Interview: 0

|        |                   |
|--------|-------------------|
| AD8_19 | AD8_TOTALMIS1_MSI |
|--------|-------------------|

[ASK IF SUM OF "DON'T KNOW/NO ANSWER OR REFUSED" RESPONSES FOR AD8\_1, AD8\_2, AD8\_3, AD8\_4, AD8\_5, AD8\_6, AD8\_7, AD8\_8 = 1]

Number of missed questions on the AD8 Dementia Screening Interview: 1

|        |                   |
|--------|-------------------|
| AD8_20 | AD8_TOTALMIS2_MSI |
|--------|-------------------|

[ASK IF SUM OF "DON'T KNOW/NO ANSWER OR REFUSED" RESPONSES FOR AD8\_1, AD8\_2, AD8\_3, AD8\_4, AD8\_5, AD8\_6, AD8\_7, AD8\_8 = 2]

Number of missed questions on the AD8 Dementia Screening Interview: 2

|        |                   |
|--------|-------------------|
| AD8_21 | AD8_TOTALMIS3_MSI |
|--------|-------------------|

[ASK IF SUM OF "DON'T KNOW/NO ANSWER OR REFUSED" RESPONSES FOR AD8\_1, AD8\_2, AD8\_3, AD8\_4, AD8\_5, AD8\_6, AD8\_7, AD8\_8 = 3]

Number of missed questions on the AD8 Dementia Screening Interview: 3

|        |                   |
|--------|-------------------|
| AD8_22 | AD8_TOTALMIS4_MSI |
|--------|-------------------|

[ASK IF SUM OF "DON'T KNOW/NO ANSWER OR REFUSED" RESPONSES FOR AD8\_1, AD8\_2, AD8\_3, AD8\_4, AD8\_5, AD8\_6, AD8\_7, AD8\_8 = 4]



CLSA Memory Study Informant Questionnaire  
v1.1, 2022 October 12

Number of missed questions on the AD8 Dementia Screening Interview: 4

|        |                   |
|--------|-------------------|
| AD8_23 | AD8_TOTALMIS5_MSI |
|--------|-------------------|

[ASK IF SUM OF "DON'T KNOW/NO ANSWER OR REFUSED" RESPONSES FOR AD8\_1, AD8\_2, AD8\_3, AD8\_4, AD8\_5, AD8\_6, AD8\_7, AD8\_8 = 5]

Number of missed questions on the AD8 Dementia Screening Interview: 5

|        |                   |
|--------|-------------------|
| AD8_24 | AD8_TOTALMIS6_MSI |
|--------|-------------------|

[ASK IF SUM OF "DON'T KNOW/NO ANSWER OR REFUSED" RESPONSES FOR AD8\_1, AD8\_2, AD8\_3, AD8\_4, AD8\_5, AD8\_6, AD8\_7, AD8\_8 = 6]

Number of missed questions on the AD8 Dementia Screening Interview: 6

|        |                   |
|--------|-------------------|
| AD8_25 | AD8_TOTALMIS7_MSI |
|--------|-------------------|

[ASK IF SUM OF "DON'T KNOW/NO ANSWER OR REFUSED" RESPONSES FOR AD8\_1, AD8\_2, AD8\_3, AD8\_4, AD8\_5, AD8\_6, AD8\_7, AD8\_8 = 7]

Number of missed questions on the AD8 Dementia Screening Interview: 7

|        |                   |
|--------|-------------------|
| AD8_26 | AD8_TOTALMIS8_MSI |
|--------|-------------------|

[ASK IF SUM OF "DON'T KNOW/NO ANSWER OR REFUSED" RESPONSES FOR AD8\_1, AD8\_2, AD8\_3, AD8\_4, AD8\_5, AD8\_6, AD8\_7, AD8\_8 = 8]

Number of missed questions on the AD8 Dementia Screening Interview: 8

AD8\_END



## Medical History (MED)

|                 |                                                                                                                                                                                                                                                                                                                                                                                    |
|-----------------|------------------------------------------------------------------------------------------------------------------------------------------------------------------------------------------------------------------------------------------------------------------------------------------------------------------------------------------------------------------------------------|
| <b>Overview</b> | The medical history module captures information that will assist the examining physician in determining if any observed cognitive limitations may be secondary to other diseases such as neurodegenerative diseases. This information may also increase the confidence in the physician's diagnosis based on the absence or presence of risk factors for neurocognitive disorders. |
|-----------------|------------------------------------------------------------------------------------------------------------------------------------------------------------------------------------------------------------------------------------------------------------------------------------------------------------------------------------------------------------------------------------|

I am now going to ask you some questions regarding @first\_name@'s medical history including different medical conditions he/she may have, and use of other substances. We do not expect you to know every detail about @first\_name@, but ask that you answer to the best of your ability.

|                                                                                                                                                                    |                    |                                          |  |
|--------------------------------------------------------------------------------------------------------------------------------------------------------------------|--------------------|------------------------------------------|--|
| <b>MED_1</b>                                                                                                                                                       | <b>MED_CON_MSI</b> |                                          |  |
| <b>[ALWAYS ASK]</b>                                                                                                                                                |                    |                                          |  |
| To your knowledge, does @first_name@ have any of the following medical conditions...?                                                                              |                    |                                          |  |
| <b>INTERVIEWER NOTES:</b> Psychotic illnesses include schizophrenia and other conditions which include hallucinations, delusions and disordered forms of thinking. |                    |                                          |  |
| <b>READ LIST, MULTIPLE RESPONSES ALLOWED (EXCEPT IF 98 OR 99 ARE SELECTED), CODE ALL THAT APPLY</b>                                                                |                    |                                          |  |
| CAD                                                                                                                                                                | 1                  | Coronary artery disease                  |  |
| HF                                                                                                                                                                 | 2                  | Heart failure                            |  |
| AF                                                                                                                                                                 | 3                  | Atrial fibrillation/flutter              |  |
| TIA                                                                                                                                                                | 4                  | Transient ischemic attack (TIA)          |  |
| STR                                                                                                                                                                | 5                  | Cerebrovascular accident (stroke)        |  |
| HEM                                                                                                                                                                | 6                  | Intracerebral hemorrhage                 |  |
| HYP                                                                                                                                                                | 7                  | Hypertension                             |  |
| DIA                                                                                                                                                                | 8                  | Diabetes mellitus                        |  |
| DYS                                                                                                                                                                | 9                  | Dyslipidemia                             |  |
| PKD                                                                                                                                                                | 10                 | Parkinson's Disease or Parkinsonism      |  |
| DEP                                                                                                                                                                | 11                 | Depression                               |  |
| ANX                                                                                                                                                                | 12                 | Anxiety disorder                         |  |
| PSY                                                                                                                                                                | 13                 | Psychotic illness                        |  |
| HR                                                                                                                                                                 | 14                 | Hearing impairment                       |  |
| VS                                                                                                                                                                 | 15                 | Visual impairment                        |  |
| SM                                                                                                                                                                 | 16                 | Impaired sense of smell                  |  |
| DEM                                                                                                                                                                | 17                 | Dementia                                 |  |
| DELI                                                                                                                                                               | 18                 | Suspected delirium (in the past 5 years) |  |
| IN                                                                                                                                                                 | 19                 | Insomnia                                 |  |
| REM                                                                                                                                                                | 20                 | REM-Sleep Behaviour Disorder             |  |
| OSA                                                                                                                                                                | 21                 | Obstructive Sleep Apnea                  |  |
| HYPT                                                                                                                                                               | 22                 | Hypothyroidism                           |  |
| B12                                                                                                                                                                | 23                 | Vitamin B12 deficiency                   |  |



**CLSA Memory Study Informant Questionnaire**  
v1.1, 2022 October 12

|         |    |                                                                                                     |
|---------|----|-----------------------------------------------------------------------------------------------------|
| OTSP    | 24 | Other conditions relevant to cognitive status (e.g. cancer and/or cancer treatments); specify _____ |
| NONEI   | 25 | None of the above                                                                                   |
| DK_NA   | 98 | <b>[DO NOT READ]</b> Don't know / No answer                                                         |
| REFUSED | 99 | <b>[DO NOT READ]</b> Refused                                                                        |

|                                                                      |                    |                                             |
|----------------------------------------------------------------------|--------------------|---------------------------------------------|
| <b>MED_2</b>                                                         | <b>MED_TBI_MSI</b> |                                             |
| <b>[ALWAYS ASK]</b>                                                  |                    |                                             |
| Has @first_name@ suffered a head injury or a concussion in the past? |                    |                                             |
| YES                                                                  | 1                  | Yes                                         |
| NO                                                                   | 2                  | No                                          |
| DK_NA                                                                | 8                  | <b>[DO NOT READ]</b> Don't know / No answer |
| REFUSED                                                              | 9                  | <b>[DO NOT READ]</b> Refused                |

|                                                                                                              |                     |                                             |
|--------------------------------------------------------------------------------------------------------------|---------------------|---------------------------------------------|
| <b>MED_3</b>                                                                                                 | <b>MED_TBI1_MSI</b> |                                             |
| <b>[ASK IF MED_TBI_MSI = YES]</b>                                                                            |                     |                                             |
| How many head injuries or concussions has @first_name@ had in his/her lifetime?                              |                     |                                             |
| <b>INTERVIEWER NOTE:</b> If the informant cannot remember exact number, please probe for their best estimate |                     |                                             |
| NUM                                                                                                          | Number              | _____ <b>[MASK: MIN=1]</b>                  |
| DK_NA                                                                                                        | 8                   | <b>[DO NOT READ]</b> Don't know / No answer |
| REFUSED                                                                                                      | 9                   | <b>[DO NOT READ]</b> Refused                |

|                                                                                                                                                       |                     |                                                       |
|-------------------------------------------------------------------------------------------------------------------------------------------------------|---------------------|-------------------------------------------------------|
| <b>MED_4</b>                                                                                                                                          | <b>MED_TBI2_MSI</b> |                                                       |
| <b>[ASK IF MED_TBI_MSI = YES]</b>                                                                                                                     |                     |                                                       |
| At what age or in what year did @first_name@ have the most serious head injury?                                                                       |                     |                                                       |
| <b>INTERVIEWER NOTE:</b> If the informant cannot remember the specific year, please probe for their best estimation of when the head injury occurred. |                     |                                                       |
| NB_SP                                                                                                                                                 | Age                 | _____ <b>[MASK: MIN=0, MAX=CURRENT AGE]</b>           |
| YR_SP                                                                                                                                                 | Year                | _____ <b>[MASK: MIN=BIRTH YEAR, MAX=CURRENT YEAR]</b> |
| DK_NA                                                                                                                                                 | 9998                | <b>[DO NOT READ]</b> Don't know / No answer           |
| REFUSED                                                                                                                                               | 9999                | <b>[DO NOT READ]</b> Refused                          |



|                                                                                                  |              |                                                |
|--------------------------------------------------------------------------------------------------|--------------|------------------------------------------------|
| MED_5                                                                                            | MED_TBI3_MSI |                                                |
| <b>[ASK IF MED_TBI_MSI = YES]</b>                                                                |              |                                                |
| Did the most serious head injury result in...?                                                   |              |                                                |
| <b>READ LIST, MULTIPLE RESPONSES ALLOWED (EXCEP IF 8 OR 9 ARE SELECTED), CODE ALL THAT APPLY</b> |              |                                                |
| DZ                                                                                               | 1            | Being dazed, confused, or "seeing stars"       |
| DRM                                                                                              | 2            | Not remembering the injury                     |
| KO                                                                                               | 3            | Losing consciousness (knocked out)             |
| NONE                                                                                             | 6            | Head injury did not result in any of the above |
| DK_NA                                                                                            | 8            | <b>[DO NOT READ]</b> Don't know / No answer    |
| REFUSED                                                                                          | 9            | <b>[DO NOT READ]</b> Refused                   |

|                                                   |              |                                             |
|---------------------------------------------------|--------------|---------------------------------------------|
| MED_6                                             | MED_TBI4_MSI |                                             |
| <b>[ASK IF MED_TBI3_MSI = KO]</b>                 |              |                                             |
| How long did @first_name@ lose consciousness for? |              |                                             |
| <b>READ LIST, CODE ONLY ONE RESPONSE</b>          |              |                                             |
| KO1                                               | 1            | Less than a minute                          |
| KO20                                              | 2            | 1-20 minutes                                |
| KO20MORE                                          | 3            | Longer than minutes                         |
| DK_NA                                             | 8            | <b>[DO NOT READ]</b> Don't know / No answer |
| REFUSED                                           | 9            | <b>[DO NOT READ]</b> Refused                |

|                                                          |                   |                                                   |
|----------------------------------------------------------|-------------------|---------------------------------------------------|
| MED_7                                                    | MED_SMKSTATUS_MSI |                                                   |
| <b>[ALWAYS ASK]</b>                                      |                   |                                                   |
| How would you describe @first_name@'s smoking status...? |                   |                                                   |
| <b>READ LIST, CODE ONLY ONE RESPONSE</b>                 |                   |                                                   |
| YES                                                      | 1                 | Yes, he/she currently smokes                      |
| NEVER                                                    | 2                 | No, he/she does not currently smoke and never has |
| FORM_DAY                                                 | 4                 | Former daily smoker (non-smoker now)              |
| FORM_OCC                                                 | 5                 | Former occasional smoker (non-smoker now)         |
| DK_NA                                                    | 8                 | <b>[DO NOT READ]</b> Don't know / No answer       |
| REFUSED                                                  | 9                 | <b>[DO NOT READ]</b> Refused                      |



**CLSA Memory Study Informant Questionnaire**  
v1.1, 2022 October 12

|                                              |                    |                                                              |
|----------------------------------------------|--------------------|--------------------------------------------------------------|
| <b>MED_8</b>                                 | <b>MED_CAN_MSI</b> |                                                              |
| <b>[ALWAYS ASK]</b>                          |                    |                                                              |
| Does @first_name@ use any cannabis products? |                    |                                                              |
| <b>READ LIST, CODE ONLY ONE RESPONSE</b>     |                    |                                                              |
| YES                                          | 1                  | Yes, he/she currently uses cannabis products                 |
| NEVER                                        | 2                  | No, he/she has never used cannabis products                  |
| FORMER                                       | 3                  | Former cannabis user, but does not use cannabis products now |
| DK_NA                                        | 8                  | <b>[DO NOT READ]</b> Don't know / No answer                  |
| REFUSED                                      | 9                  | <b>[DO NOT READ]</b> Refused                                 |

|                                                            |                    |                                                    |
|------------------------------------------------------------|--------------------|----------------------------------------------------|
| <b>MED_9</b>                                               | <b>MED_ALC_MSI</b> |                                                    |
| <b>[ALWAYS ASK]</b>                                        |                    |                                                    |
| How would you describe @first_name@'s alcohol consumption? |                    |                                                    |
| <b>READ LIST, CODE ONLY ONE RESPONSE</b>                   |                    |                                                    |
| NEVER                                                      | 1                  | Never drank alcohol                                |
| FORMER                                                     | 2                  | Used to drink alcohol but does not currently drink |
| CURRENT                                                    | 3                  | Currently consumes alcohol                         |
| DK_NA                                                      | 8                  | <b>[DO NOT READ]</b> Don't know / No answer        |
| REFUSED                                                    | 9                  | <b>[DO NOT READ]</b> Refused                       |

|                                                                                                                                                                                                                                          |                                                                |                                             |
|------------------------------------------------------------------------------------------------------------------------------------------------------------------------------------------------------------------------------------------|----------------------------------------------------------------|---------------------------------------------|
| <b>MED_10</b>                                                                                                                                                                                                                            | <b>MED_ALCNMB_MSI</b>                                          |                                             |
| <b>[ASK IF MED_ALC_MSI = CURRENT]</b>                                                                                                                                                                                                    |                                                                |                                             |
| A "standard" drink is considered 12 ounces of regular beer (~5% alcohol), 5 ounces of wine (~12% alcohol), or 1.5 ounces of distilled spirits (~40% alcohol). How many estimated standardized drinks per week does @first_name@ consume? |                                                                |                                             |
| ALC_NB                                                                                                                                                                                                                                   | Number of standard drinks: _____ <b>[MASK: MIN=0, MAX=200]</b> |                                             |
| DK_NA                                                                                                                                                                                                                                    | 998                                                            | <b>[DO NOT READ]</b> Don't know / No answer |
| REFUSED                                                                                                                                                                                                                                  | 999                                                            | <b>[DO NOT READ]</b> Refused                |

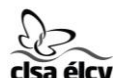

|                                                                                                             |                 |                                             |
|-------------------------------------------------------------------------------------------------------------|-----------------|---------------------------------------------|
| MED_11                                                                                                      | MED_ALCMLFQ_MSI |                                             |
| <b>[ASK IF MED_ALC_MSI = CURRENT AND AND SEX = MALE]</b>                                                    |                 |                                             |
| In the past 12 months, has @first_name@ consumed 5 or more drinks in 2 hours or less at least once a month? |                 |                                             |
| YES                                                                                                         | 1               | Yes                                         |
| NO                                                                                                          | 2               | No                                          |
| DK_NA                                                                                                       | 8               | <b>[DO NOT READ]</b> Don't know / No answer |
| REFUSED                                                                                                     | 9               | <b>[DO NOT READ]</b> Refused                |

|                                                                                                             |                 |                                             |
|-------------------------------------------------------------------------------------------------------------|-----------------|---------------------------------------------|
| MED_12                                                                                                      | MED_ALCFMFQ_MSI |                                             |
| <b>[ASK IF MED_ALC_MSI = CURRENT AND SEX = FEMALE]</b>                                                      |                 |                                             |
| In the past 12 months, has @first_name@ consumed 4 or more drinks in 2 hours or less at least once a month? |                 |                                             |
| YES                                                                                                         | 1               | Yes                                         |
| NO                                                                                                          | 2               | No                                          |
| DK_NA                                                                                                       | 8               | <b>[DO NOT READ]</b> Don't know / No answer |
| REFUSED                                                                                                     | 9               | <b>[DO NOT READ]</b> Refused                |

|                                                                                                                 |             |                                             |
|-----------------------------------------------------------------------------------------------------------------|-------------|---------------------------------------------|
| MED_13                                                                                                          | MED_FAM_MSI |                                             |
| <b>[ALWAYS ASK]</b>                                                                                             |             |                                             |
| Does the @first_name@ have a first degree relative who has been diagnosed with dementia or Alzheimer's Disease? |             |                                             |
| <b>INTERVIEWER NOTE:</b> First degree relatives include biological parents, siblings, or children               |             |                                             |
| YES                                                                                                             | 1           | Yes                                         |
| NO                                                                                                              | 2           | No                                          |
| DK_NA                                                                                                           | 8           | <b>[DO NOT READ]</b> Don't know / No answer |
| REFUSED                                                                                                         | 9           | <b>[DO NOT READ]</b> Refused                |

MED\_END



## Basic Activities of Daily Living (ADL)

This module is a modification of the Activities of Daily Living questions of the OARS Multidimensional Assessment Questionnaire© developed by Dr. Gerda G. Fillenbaum (Duke University Medical Center). The Canadian Longitudinal Study on Aging received permission from Dr. Fillenbaum (instrument developer) for the use of this instrument.

|                 |                                                                                                                                                                                                                                                                                                                                                                                                                                                                                                                                                                                                                                                                                                                                                                                                                                                                       |
|-----------------|-----------------------------------------------------------------------------------------------------------------------------------------------------------------------------------------------------------------------------------------------------------------------------------------------------------------------------------------------------------------------------------------------------------------------------------------------------------------------------------------------------------------------------------------------------------------------------------------------------------------------------------------------------------------------------------------------------------------------------------------------------------------------------------------------------------------------------------------------------------------------|
| <b>Overview</b> | <p>The Activities of Daily Living (ADL) scale assesses respondents' ability to perform <u>basic</u> daily activities. Activities of daily living are the tasks considered vital to live independently in the community.</p> <p>The informant is asked if the participant requires help when feeding and dressing oneself, taking care of their appearance, walking around, getting in and out of bed, bathing, and whether the participant has incontinence problems. These basic daily activities can be difficult to perform for people with mobility restrictions or limitations.</p> <p>Information on activities of daily living will help provide insights into limitations that Canadians may face in day-to-day living, as well as how these limitations change as people age. It is a measure related to the need for caregivers and home care services.</p> |
|-----------------|-----------------------------------------------------------------------------------------------------------------------------------------------------------------------------------------------------------------------------------------------------------------------------------------------------------------------------------------------------------------------------------------------------------------------------------------------------------------------------------------------------------------------------------------------------------------------------------------------------------------------------------------------------------------------------------------------------------------------------------------------------------------------------------------------------------------------------------------------------------------------|

Now I'd like to ask you about activities of daily living. You may feel that some of these questions do not apply to @first\_name@, but it is important that we ask the same questions of everyone.

|                                                                                                                 |                      |                                             |
|-----------------------------------------------------------------------------------------------------------------|----------------------|---------------------------------------------|
| <b>ADL_1</b>                                                                                                    | <b>ADL_ABLDR_MSI</b> |                                             |
| <b>[ALWAYS ASK]</b>                                                                                             |                      |                                             |
| Can @first_name@ dress and undress without help (including picking out clothes and putting on socks and shoes)? |                      |                                             |
| YES                                                                                                             | 1                    | Yes                                         |
| NO                                                                                                              | 2                    | No                                          |
| DK_NA                                                                                                           | 8                    | <b>[DO NOT READ]</b> Don't know / No answer |
| REFUSED                                                                                                         | 9                    | <b>[DO NOT READ]</b> Refused                |

|                                                    |                     |                                             |
|----------------------------------------------------|---------------------|---------------------------------------------|
| <b>ADL_2</b>                                       | <b>ADL_HPDR_MSI</b> |                                             |
| <b>[ASK IF ADL_ABLDR_MSI = NO]</b>                 |                     |                                             |
| Can @first_name@ dress and undress with some help? |                     |                                             |
| YES                                                | 1                   | Yes                                         |
| NO                                                 | 2                   | No                                          |
| DK_NA                                              | 8                   | <b>[DO NOT READ]</b> Don't know / No answer |
| REFUSED                                            | 9                   | <b>[DO NOT READ]</b> Refused                |





|                                                         |              |                                             |
|---------------------------------------------------------|--------------|---------------------------------------------|
| ADL_3                                                   | ADL_UNDR_MSI |                                             |
| <b>[ASK IF ADL_HPDR_MSI = NO]</b>                       |              |                                             |
| Is @first_name@ completely unable to dress and undress? |              |                                             |
| YES                                                     | 1            | Yes                                         |
| NO                                                      | 2            | No                                          |
| DK_NA                                                   | 8            | <b>[DO NOT READ]</b> Don't know / No answer |
| REFUSED                                                 | 9            | <b>[DO NOT READ]</b> Refused                |

|                                                                                   |               |                                             |
|-----------------------------------------------------------------------------------|---------------|---------------------------------------------|
| ADL_4                                                                             | ADL_ABLFD_MSI |                                             |
| <b>[ALWAYS ASK]</b>                                                               |               |                                             |
| Can @first_name@ eat without help (i.e., able to feed him or herself completely)? |               |                                             |
| YES                                                                               | 1             | Yes                                         |
| NO                                                                                | 2             | No                                          |
| DK_NA                                                                             | 8             | <b>[DO NOT READ]</b> Don't know / No answer |
| REFUSED                                                                           | 9             | <b>[DO NOT READ]</b> Refused                |

|                                                                                 |              |                                             |
|---------------------------------------------------------------------------------|--------------|---------------------------------------------|
| ADL_5                                                                           | ADL_HPFD_MSI |                                             |
| <b>[ASK IF ADL_ABLFD_MSI = NO]</b>                                              |              |                                             |
| Can @first_name@ eat with some help (i.e., needs help with cutting food, etc.)? |              |                                             |
| YES                                                                             | 1            | Yes                                         |
| NO                                                                              | 2            | No                                          |
| DK_NA                                                                           | 8            | <b>[DO NOT READ]</b> Don't know / No answer |
| REFUSED                                                                         | 9            | <b>[DO NOT READ]</b> Refused                |

|                                                               |              |                                             |
|---------------------------------------------------------------|--------------|---------------------------------------------|
| ADL_6                                                         | ADL_UNFD_MSI |                                             |
| <b>[ASK IF ADL_HPFD_MSI = NO]</b>                             |              |                                             |
| Is @first_name@ completely unable to feed himself or herself? |              |                                             |
| YES                                                           | 1            | Yes                                         |
| NO                                                            | 2            | No                                          |
| DK_NA                                                         | 8            | <b>[DO NOT READ]</b> Don't know / No answer |
| REFUSED                                                       | 9            | <b>[DO NOT READ]</b> Refused                |



**CLSA Memory Study Informant Questionnaire**  
v1.1, 2022 October 12

|                                                                                                                  |                      |                                             |
|------------------------------------------------------------------------------------------------------------------|----------------------|---------------------------------------------|
| <b>ADL_7</b>                                                                                                     | <b>ADL_ABLAP_MSI</b> |                                             |
| <b>[ALWAYS ASK]</b>                                                                                              |                      |                                             |
| Can @first_name@ take care of his/her own appearance without help, for example, combing hair, shaving (if male)? |                      |                                             |
| YES                                                                                                              | 1                    | Yes                                         |
| NO                                                                                                               | 2                    | No                                          |
| DK_NA                                                                                                            | 8                    | <b>[DO NOT READ]</b> Don't know / No answer |
| REFUSED                                                                                                          | 9                    | <b>[DO NOT READ]</b> Refused                |

|                                                                         |                     |                                             |
|-------------------------------------------------------------------------|---------------------|---------------------------------------------|
| <b>ADL_8</b>                                                            | <b>ADL_HPAP_MSI</b> |                                             |
| <b>[ASK IF ADL_ABLAP_MSI = NO]</b>                                      |                     |                                             |
| Can @first_name@ take care of his or her own appearance with some help? |                     |                                             |
| YES                                                                     | 1                   | Yes                                         |
| NO                                                                      | 2                   | No                                          |
| DK_NA                                                                   | 8                   | <b>[DO NOT READ]</b> Don't know / No answer |
| REFUSED                                                                 | 9                   | <b>[DO NOT READ]</b> Refused                |

|                                                                              |                     |                                             |
|------------------------------------------------------------------------------|---------------------|---------------------------------------------|
| <b>ADL_9</b>                                                                 | <b>ADL_UNAP_MSI</b> |                                             |
| <b>[ASK IF ADL_HPAP_MSI = NO]</b>                                            |                     |                                             |
| Is @first_name@ completely unable to take care of his or her own appearance? |                     |                                             |
| YES                                                                          | 1                   | Yes                                         |
| NO                                                                           | 2                   | No                                          |
| DK_NA                                                                        | 8                   | <b>[DO NOT READ]</b> Don't know / No answer |
| REFUSED                                                                      | 9                   | <b>[DO NOT READ]</b> Refused                |

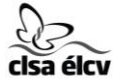

|                                                                       |               |                                             |
|-----------------------------------------------------------------------|---------------|---------------------------------------------|
| ADL_10                                                                | ADL_ABLWK_MSI |                                             |
| <b>[ALWAYS ASK]</b>                                                   |               |                                             |
| Can @first_name@ walk without help?                                   |               |                                             |
| <b>INTERVIEWER NOTE: IF PARTICIPANT WALKS WITH A CANE CODE AS YES</b> |               |                                             |
| YES                                                                   | 1             | Yes                                         |
| NO                                                                    | 2             | No                                          |
| DK_NA                                                                 | 8             | <b>[DO NOT READ]</b> Don't know / No answer |
| REFUSED                                                               | 9             | <b>[DO NOT READ]</b> Refused                |

|                                                                                                    |              |                                             |
|----------------------------------------------------------------------------------------------------|--------------|---------------------------------------------|
| ADL_11                                                                                             | ADL_HPWK_MSI |                                             |
| <b>[ASK IF ADL_ABLWK_MSI = NO]</b>                                                                 |              |                                             |
| Can @first_name@ walk with some help from a person, or with the use of a walker or crutches, etc.? |              |                                             |
| YES                                                                                                | 1            | Yes                                         |
| NO                                                                                                 | 2            | No                                          |
| DK_NA                                                                                              | 8            | <b>[DO NOT READ]</b> Don't know / No answer |
| REFUSED                                                                                            | 9            | <b>[DO NOT READ]</b> Refused                |

|                                            |              |                                             |
|--------------------------------------------|--------------|---------------------------------------------|
| ADL_12                                     | ADL_UNWK_MSI |                                             |
| <b>[ASK IF ADL_HPWK_MSI = NO]</b>          |              |                                             |
| Is @first_name@ completely unable to walk? |              |                                             |
| YES                                        | 1            | Yes                                         |
| NO                                         | 2            | No                                          |
| DK_NA                                      | 8            | <b>[DO NOT READ]</b> Don't know / No answer |
| REFUSED                                    | 9            | <b>[DO NOT READ]</b> Refused                |



**CLSA Memory Study Informant Questionnaire**  
v1.1, 2022 October 12

|                                                                  |                      |                                             |
|------------------------------------------------------------------|----------------------|---------------------------------------------|
| <b>ADL_13</b>                                                    | <b>ADL_ABLBD_MSI</b> |                                             |
| <b>[ALWAYS ASK]</b>                                              |                      |                                             |
| Can @first_name@ get in and out of bed without any help or aids? |                      |                                             |
| YES                                                              | 1                    | Yes                                         |
| NO                                                               | 2                    | No                                          |
| DK_NA                                                            | 8                    | <b>[DO NOT READ]</b> Don't know / No answer |
| REFUSED                                                          | 9                    | <b>[DO NOT READ]</b> Refused                |

|                                                                                                              |                     |                                             |
|--------------------------------------------------------------------------------------------------------------|---------------------|---------------------------------------------|
| <b>ADL_14</b>                                                                                                | <b>ADL_HPBD_MSI</b> |                                             |
| <b>[ASK IF ADL_ABLBD_MSI = NO]</b>                                                                           |                     |                                             |
| Can @first_name@ get in and out of bed with some help (either from a person or with the aid of some device)? |                     |                                             |
| YES                                                                                                          | 1                   | Yes                                         |
| NO                                                                                                           | 2                   | No                                          |
| DK_NA                                                                                                        | 8                   | <b>[DO NOT READ]</b> Don't know / No answer |
| REFUSED                                                                                                      | 9                   | <b>[DO NOT READ]</b> Refused                |

|                                                                                      |                     |                                             |
|--------------------------------------------------------------------------------------|---------------------|---------------------------------------------|
| <b>ADL_15</b>                                                                        | <b>ADL_UNBD_MSI</b> |                                             |
| <b>[ASK IF ADL_HPBD_MSI = NO]</b>                                                    |                     |                                             |
| Is @first_name@ totally dependent on someone else to lift him/her in and out of bed? |                     |                                             |
| YES                                                                                  | 1                   | Yes                                         |
| NO                                                                                   | 2                   | No                                          |
| DK_NA                                                                                | 8                   | <b>[DO NOT READ]</b> Don't know / No answer |
| REFUSED                                                                              | 9                   | <b>[DO NOT READ]</b> Refused                |

|                                                      |                      |                                             |
|------------------------------------------------------|----------------------|---------------------------------------------|
| <b>ADL_16</b>                                        | <b>ADL_ABLBT_MSI</b> |                                             |
| <b>[ALWAYS ASK]</b>                                  |                      |                                             |
| Can @first_name@ take a bath or shower without help? |                      |                                             |
| YES                                                  | 1                    | Yes                                         |
| NO                                                   | 2                    | No                                          |
| DK_NA                                                | 8                    | <b>[DO NOT READ]</b> Don't know / No answer |
| REFUSED                                              | 9                    | <b>[DO NOT READ]</b> Refused                |



|                                                                                                                                                              |              |                                             |
|--------------------------------------------------------------------------------------------------------------------------------------------------------------|--------------|---------------------------------------------|
| ADL_17                                                                                                                                                       | ADL_HPBT_MSI |                                             |
| <b>[ASK IF ADL_ABLBT_MSI = NO]</b>                                                                                                                           |              |                                             |
| Can @first_name@ take a bath or shower with some help (i.e., needs help from someone getting in and out of the tub or needs special attachments on the tub)? |              |                                             |
| YES                                                                                                                                                          | 1            | Yes                                         |
| NO                                                                                                                                                           | 2            | No                                          |
| DK_NA                                                                                                                                                        | 8            | <b>[DO NOT READ]</b> Don't know / No answer |
| REFUSED                                                                                                                                                      | 9            | <b>[DO NOT READ]</b> Refused                |

|                                                                                   |              |                                             |
|-----------------------------------------------------------------------------------|--------------|---------------------------------------------|
| ADL_18                                                                            | ADL_UNBT_MSI |                                             |
| <b>[ASK IF ADL_HPBT_MSI = NO]</b>                                                 |              |                                             |
| Is @first_name@ completely unable to take a bath and a shower by himself/herself? |              |                                             |
| YES                                                                               | 1            | Yes                                         |
| NO                                                                                | 2            | No                                          |
| DK_NA                                                                             | 8            | <b>[DO NOT READ]</b> Don't know / No answer |
| REFUSED                                                                           | 9            | <b>[DO NOT READ]</b> Refused                |

|                                                                      |              |                                             |
|----------------------------------------------------------------------|--------------|---------------------------------------------|
| ADL_19                                                               | ADL_BATH_MSI |                                             |
| <b>[ALWAYS ASK]</b>                                                  |              |                                             |
| Does @first_name@ ever have trouble getting to the bathroom in time? |              |                                             |
| YES                                                                  | 1            | Yes                                         |
| NO                                                                   | 2            | No                                          |
| DK_NA                                                                | 8            | <b>[DO NOT READ]</b> Don't know / No answer |
| REFUSED                                                              | 9            | <b>[DO NOT READ]</b> Refused                |

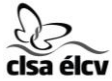

**CLSA Memory Study Informant Questionnaire**  
v1.1, 2022 October 12

|                                                                                                 |               |                                             |
|-------------------------------------------------------------------------------------------------|---------------|---------------------------------------------|
| ADL_20                                                                                          | ADL_INCNT_MSI |                                             |
| <b>[ASK IF ADL_BATH_MSI = YES]</b>                                                              |               |                                             |
| How often does @first_name@ wet or soil himself/herself (either day or night)? Would you say... |               |                                             |
| <b>READ LIST, CODE ONLY ONE RESPONSE</b>                                                        |               |                                             |
| 0_1_TIME_WEEK                                                                                   | 1             | Never or less than once a week              |
| 1_2_TIME_WEEK                                                                                   | 2             | Once or twice a week                        |
| 3_MORE_TIMES_WEEK                                                                               | 3             | Three times a week or more                  |
| DK_NA                                                                                           | 8             | <b>[DO NOT READ]</b> Don't know / No answer |
| REFUSED                                                                                         | 9             | <b>[DO NOT READ]</b> Refused                |

ADL\_END



## Instrumental Activities of Daily Living (IADL)

This module is a modification of the Activities of Daily Living questions of the OARS Multidimensional Assessment Questionnaire© developed by Dr. Gerda G. Fillenbaum (Duke University Medical Center). The Canadian Longitudinal Study on Aging received permission from Dr. Fillenbaum (instrument developer) for the use of this instrument.

|                 |                                                                                                                                                                                                                                                                                                                                                                                                                                                                                                                                                                                                                                                                       |
|-----------------|-----------------------------------------------------------------------------------------------------------------------------------------------------------------------------------------------------------------------------------------------------------------------------------------------------------------------------------------------------------------------------------------------------------------------------------------------------------------------------------------------------------------------------------------------------------------------------------------------------------------------------------------------------------------------|
| <b>Overview</b> | <p>The Instrumental Activities of Daily Living (IADL) scale assesses respondents' ability to independently perform a series of daily activities.</p> <p>The informant is asked if the participant requires help when using the telephone, traveling, shopping, cooking, doing housework, taking medicine and handling money. Information on instrumental activities of daily living will help provide insights into limitations that Canadians may face day-to-day living, as well as how these limitations change as people age. It is a measure related to the need for caregivers and home care services.</p> <p>This module is a companion to the ADL module.</p> |
|-----------------|-----------------------------------------------------------------------------------------------------------------------------------------------------------------------------------------------------------------------------------------------------------------------------------------------------------------------------------------------------------------------------------------------------------------------------------------------------------------------------------------------------------------------------------------------------------------------------------------------------------------------------------------------------------------------|

Now I'd like to ask you about activities of daily living. You may feel that some of these questions do not apply to @first\_name@, but it is important that we ask the same questions of everyone.

|                                                                                             |                       |                                             |
|---------------------------------------------------------------------------------------------|-----------------------|---------------------------------------------|
| <b>IAL_1</b>                                                                                | <b>IAL_ABLTEL_MSI</b> |                                             |
| <b>[ALWAYS ASK]</b>                                                                         |                       |                                             |
| Can @first_name@ use the telephone without help, including looking up numbers and dialling? |                       |                                             |
| YES                                                                                         | 1                     | Yes                                         |
| NO                                                                                          | 2                     | No                                          |
| DK_NA                                                                                       | 8                     | <b>[DO NOT READ]</b> Don't know / No answer |
| REFUSED                                                                                     | 9                     | <b>[DO NOT READ]</b> Refused                |

|                                                                                                                                                                                           |                       |                                             |
|-------------------------------------------------------------------------------------------------------------------------------------------------------------------------------------------|-----------------------|---------------------------------------------|
| <b>IAL_2</b>                                                                                                                                                                              | <b>IAL_HPTTEL_MSI</b> |                                             |
| <b>[ASK IF IAL_ABLTEL_MSI = NO]</b>                                                                                                                                                       |                       |                                             |
| Can @first_name@ use the telephone with some help (i.e., can answer the phone or dial the operator in an emergency, but needs a special phone or help in getting the number or dialling)? |                       |                                             |
| YES                                                                                                                                                                                       | 1                     | Yes                                         |
| NO                                                                                                                                                                                        | 2                     | No                                          |
| DK_NA                                                                                                                                                                                     | 8                     | <b>[DO NOT READ]</b> Don't know / No answer |
| REFUSED                                                                                                                                                                                   | 9                     | <b>[DO NOT READ]</b> Refused                |



**CLSA Memory Study Informant Questionnaire**  
v1.1, 2022 October 12

|                                                         |               |                                             |
|---------------------------------------------------------|---------------|---------------------------------------------|
| IAL_3                                                   | IAL_UNTEL_MSI |                                             |
| <b>[ASK IF IAL_HPTTEL_MSI = NO]</b>                     |               |                                             |
| Is @first_name@ completely unable to use the telephone? |               |                                             |
| YES                                                     | 1             | Yes                                         |
| NO                                                      | 2             | No                                          |
| DK_NA                                                   | 8             | <b>[DO NOT READ]</b> Don't know / No answer |
| REFUSED                                                 | 9             | <b>[DO NOT READ]</b> Refused                |

|                                                                                                                                |                |                                             |
|--------------------------------------------------------------------------------------------------------------------------------|----------------|---------------------------------------------|
| IAL_4                                                                                                                          | IAL_ABLTRV_MSI |                                             |
| <b>[ALWAYS ASK]</b>                                                                                                            |                |                                             |
| Can @first_name@ get to places out of walking distance without help (i.e., drive own car, or travel alone on buses, or taxis)? |                |                                             |
| YES                                                                                                                            | 1              | Yes                                         |
| NO                                                                                                                             | 2              | No                                          |
| DK_NA                                                                                                                          | 8              | <b>[DO NOT READ]</b> Don't know / No answer |
| REFUSED                                                                                                                        | 9              | <b>[DO NOT READ]</b> Refused                |

|                                                                                                                                                 |               |                                             |
|-------------------------------------------------------------------------------------------------------------------------------------------------|---------------|---------------------------------------------|
| IAL_5                                                                                                                                           | IAL_HPTRV_MSI |                                             |
| <b>[ASK IF IAL_ABLTRV_MSI = NO]</b>                                                                                                             |               |                                             |
| Can @first_name@ get to places out of walking distance with some help (i.e., needs someone to help him/her or go with him/her when travelling)? |               |                                             |
| YES                                                                                                                                             | 1             | Yes                                         |
| NO                                                                                                                                              | 2             | No                                          |
| DK_NA                                                                                                                                           | 8             | <b>[DO NOT READ]</b> Don't know / No answer |
| REFUSED                                                                                                                                         | 9             | <b>[DO NOT READ]</b> Refused                |





|                                                                                                                       |               |                                             |
|-----------------------------------------------------------------------------------------------------------------------|---------------|---------------------------------------------|
| IAL_6                                                                                                                 | IAL_UNTRV_MSI |                                             |
| <b>[ASK IF IAL_HPTRV_MSI = NO]</b>                                                                                    |               |                                             |
| Is @first_name@ unable to travel unless emergency arrangements are made for a specialized vehicle, like an ambulance? |               |                                             |
| YES                                                                                                                   | 1             | Yes                                         |
| NO                                                                                                                    | 2             | No                                          |
| DK_NA                                                                                                                 | 8             | <b>[DO NOT READ]</b> Don't know / No answer |
| REFUSED                                                                                                               | 9             | <b>[DO NOT READ]</b> Refused                |

|                                                                                                         |                |                                             |
|---------------------------------------------------------------------------------------------------------|----------------|---------------------------------------------|
| IAL_7                                                                                                   | IAL_ABLGRO_MSI |                                             |
| <b>[ALWAYS ASK]</b>                                                                                     |                |                                             |
| Can @first_name@ go shopping for groceries or clothes without help (taking care of all shopping needs)? |                |                                             |
| YES                                                                                                     | 1              | Yes                                         |
| NO                                                                                                      | 2              | No                                          |
| DK_NA                                                                                                   | 8              | <b>[DO NOT READ]</b> Don't know / No answer |
| REFUSED                                                                                                 | 9              | <b>[DO NOT READ]</b> Refused                |

|                                                                                                                                      |               |                                             |
|--------------------------------------------------------------------------------------------------------------------------------------|---------------|---------------------------------------------|
| IAL_8                                                                                                                                | IAL_HPGRO_MSI |                                             |
| <b>[ASK IF IAL_ABLGRO_MSI = NO]</b>                                                                                                  |               |                                             |
| Can @first_name@ go shopping for groceries or clothes with some help (i.e., needs someone to go with him/her on all shopping trips)? |               |                                             |
| YES                                                                                                                                  | 1             | Yes                                         |
| NO                                                                                                                                   | 2             | No                                          |
| DK_NA                                                                                                                                | 8             | <b>[DO NOT READ]</b> Don't know / No answer |
| REFUSED                                                                                                                              | 9             | <b>[DO NOT READ]</b> Refused                |



**CLSA Memory Study Informant Questionnaire**  
v1.1, 2022 October 12

|                                                       |               |                                             |
|-------------------------------------------------------|---------------|---------------------------------------------|
| IAL_9                                                 | IAL_UNGRO_MSI |                                             |
| <b>[ASK IF IAL_HPGRO_MSI = NO]</b>                    |               |                                             |
| Is @first_name@ completely unable to do any shopping? |               |                                             |
| YES                                                   | 1             | Yes                                         |
| NO                                                    | 2             | No                                          |
| DK_NA                                                 | 8             | <b>[DO NOT READ]</b> Don't know / No answer |
| REFUSED                                               | 9             | <b>[DO NOT READ]</b> Refused                |

|                                                                                           |               |                                             |
|-------------------------------------------------------------------------------------------|---------------|---------------------------------------------|
| IAL_10                                                                                    | IAL_ABLML_MSI |                                             |
| <b>[ALWAYS ASK]</b>                                                                       |               |                                             |
| Can @first_name@ prepare his/her own meals without help (i.e., plan and cook full meals)? |               |                                             |
| YES                                                                                       | 1             | Yes                                         |
| NO                                                                                        | 2             | No                                          |
| DK_NA                                                                                     | 8             | <b>[DO NOT READ]</b> Don't know / No answer |
| REFUSED                                                                                   | 9             | <b>[DO NOT READ]</b> Refused                |

|                                                                                                                              |              |                                             |
|------------------------------------------------------------------------------------------------------------------------------|--------------|---------------------------------------------|
| IAL_11                                                                                                                       | IAL_HPML_MSI |                                             |
| <b>[ASK IF IAL_ABLML_MSI = NO]</b>                                                                                           |              |                                             |
| Can @first_name@ prepare his/her own meals with some help (i.e., can prepare some things but are unable to cook full meals)? |              |                                             |
| YES                                                                                                                          | 1            | Yes                                         |
| NO                                                                                                                           | 2            | No                                          |
| DK_NA                                                                                                                        | 8            | <b>[DO NOT READ]</b> Don't know / No answer |
| REFUSED                                                                                                                      | 9            | <b>[DO NOT READ]</b> Refused                |

|                                                         |              |                                             |
|---------------------------------------------------------|--------------|---------------------------------------------|
| IAL_12                                                  | IAL_UNML_MSI |                                             |
| <b>[ASK IF IAL_HPML_MSI = NO]</b>                       |              |                                             |
| Is @first_name@ completely unable to prepare any meals? |              |                                             |
| YES                                                     | 1            | Yes                                         |
| NO                                                      | 2            | No                                          |
| DK_NA                                                   | 8            | <b>[DO NOT READ]</b> Don't know / No answer |
| REFUSED                                                 | 9            | <b>[DO NOT READ]</b> Refused                |



|                                                                            |                |                                             |
|----------------------------------------------------------------------------|----------------|---------------------------------------------|
| IAL_13                                                                     | IAL_ABLWRK_MSI |                                             |
| <b>[ALWAYS ASK]</b>                                                        |                |                                             |
| Can @first_name@ do housework without help (i.e., can clean floors, etc.)? |                |                                             |
| YES                                                                        | 1              | Yes                                         |
| NO                                                                         | 2              | No                                          |
| DK_NA                                                                      | 8              | <b>[DO NOT READ]</b> Don't know / No answer |
| REFUSED                                                                    | 9              | <b>[DO NOT READ]</b> Refused                |

|                                                                                                             |               |                                             |
|-------------------------------------------------------------------------------------------------------------|---------------|---------------------------------------------|
| IAL_14                                                                                                      | IAL_HPWRK_MSI |                                             |
| <b>[ASK IF IAL_ABLWRK_MSI = NO]</b>                                                                         |               |                                             |
| Can @first_name@ do housework with some help (i.e., can do light housework but needs help with heavy work)? |               |                                             |
| YES                                                                                                         | 1             | Yes                                         |
| NO                                                                                                          | 2             | No                                          |
| DK_NA                                                                                                       | 8             | <b>[DO NOT READ]</b> Don't know / No answer |
| REFUSED                                                                                                     | 9             | <b>[DO NOT READ]</b> Refused                |

|                                                        |               |                                             |
|--------------------------------------------------------|---------------|---------------------------------------------|
| IAL_15                                                 | IAL_UNWRK_MSI |                                             |
| <b>[ASK IF IAL_HPWRK_MSI = NO]</b>                     |               |                                             |
| Is @first_name@ completely unable to do any housework? |               |                                             |
| YES                                                    | 1             | Yes                                         |
| NO                                                     | 2             | No                                          |
| DK_NA                                                  | 8             | <b>[DO NOT READ]</b> Don't know / No answer |
| REFUSED                                                | 9             | <b>[DO NOT READ]</b> Refused                |

|                                                                                                    |                |                                             |
|----------------------------------------------------------------------------------------------------|----------------|---------------------------------------------|
| IAL_16                                                                                             | IAL_ABLMED_MSI |                                             |
| <b>[ALWAYS ASK]</b>                                                                                |                |                                             |
| Can @first_name@ take his or her own medicine without help (in the right doses at the right time)? |                |                                             |
| <b>INTERVIEWER INSTRUCTIONS: IF THE PARTICIPANT OCCASIONALLY FORGETS, CODE AS 'YES'.</b>           |                |                                             |
| YES                                                                                                | 1              | Yes                                         |
| NO                                                                                                 | 2              | No                                          |
| DK_NA                                                                                              | 8              | <b>[DO NOT READ]</b> Don't know / No answer |
| REFUSED                                                                                            | 9              | <b>[DO NOT READ]</b> Refused                |



**CLSA Memory Study Informant Questionnaire**  
v1.1, 2022 October 12

|                                                                                                                                                              |               |                                             |
|--------------------------------------------------------------------------------------------------------------------------------------------------------------|---------------|---------------------------------------------|
| IAL_17                                                                                                                                                       | IAL_HPMED_MSI |                                             |
| <b>[ASK IF IAL_ABLMED_MSI = NO]</b>                                                                                                                          |               |                                             |
| Can @first_name@ take his or her own medicine with some help (i.e., able to take medicine if someone prepares it for him/her or reminds him/her to take it)? |               |                                             |
| YES                                                                                                                                                          | 1             | Yes                                         |
| NO                                                                                                                                                           | 2             | No                                          |
| DK_NA                                                                                                                                                        | 8             | <b>[DO NOT READ]</b> Don't know / No answer |
| REFUSED                                                                                                                                                      | 9             | <b>[DO NOT READ]</b> Refused                |

|                                                                 |               |                                             |
|-----------------------------------------------------------------|---------------|---------------------------------------------|
| IAL_18                                                          | IAL_UNMED_MSI |                                             |
| <b>[ASK IF IAL_HPMED_MSI = NO]</b>                              |               |                                             |
| Is @first_name@ completely unable to take his/her own medicine? |               |                                             |
| YES                                                             | 1             | Yes                                         |
| NO                                                              | 2             | No                                          |
| DK_NA                                                           | 8             | <b>[DO NOT READ]</b> Don't know / No answer |
| REFUSED                                                         | 9             | <b>[DO NOT READ]</b> Refused                |

|                                                                                                |               |                                             |
|------------------------------------------------------------------------------------------------|---------------|---------------------------------------------|
| IAL_19                                                                                         | IAL_ABLMO_MSI |                                             |
| <b>[ALWAYS ASK]</b>                                                                            |               |                                             |
| Can @first_name@ handle his/her own money without help (i.e., write cheques, pay bills, etc.)? |               |                                             |
| <b>INTERVIEWER INSTRUCTIONS: IF THE PARTICIPANT OCCASIONALLY FORGETS, CODE AS 'YES'.</b>       |               |                                             |
| YES                                                                                            | 1             | Yes                                         |
| NO                                                                                             | 2             | No                                          |
| DK_NA                                                                                          | 8             | <b>[DO NOT READ]</b> Don't know / No answer |
| REFUSED                                                                                        | 9             | <b>[DO NOT READ]</b> Refused                |

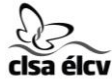

**CLSA Memory Study Informant Questionnaire**  
v1.1, 2022 October 12

|                                                                                                                                                    |              |                                             |
|----------------------------------------------------------------------------------------------------------------------------------------------------|--------------|---------------------------------------------|
| IAL_20                                                                                                                                             | IAL_HPMO_MSI |                                             |
| <b>[ASK IF IAL_ABLMO_MSI = NO]</b>                                                                                                                 |              |                                             |
| Can @first_name@ handle his/her own money with some help (i.e., manage day-to-day buying but needs help with managing chequebook or paying bills)? |              |                                             |
| YES                                                                                                                                                | 1            | Yes                                         |
| NO                                                                                                                                                 | 2            | No                                          |
| DK_NA                                                                                                                                              | 8            | <b>[DO NOT READ]</b> Don't know / No answer |
| REFUSED                                                                                                                                            | 9            | <b>[DO NOT READ]</b> Refused                |

|                                                                |              |                                             |
|----------------------------------------------------------------|--------------|---------------------------------------------|
| IAL_21                                                         | IAL_UNMO_MSI |                                             |
| <b>[ASK IF IAL_HPMO_MSI = NO]</b>                              |              |                                             |
| Is @first_name@ completely unable to handle his/her own money? |              |                                             |
| YES                                                            | 1            | Yes                                         |
| NO                                                             | 2            | No                                          |
| DK_NA                                                          | 8            | <b>[DO NOT READ]</b> Don't know / No answer |
| REFUSED                                                        | 9            | <b>[DO NOT READ]</b> Refused                |

IAL\_END



## Transportation (TRA)

|                 |                                                                                                                                   |
|-----------------|-----------------------------------------------------------------------------------------------------------------------------------|
| <b>Overview</b> | The questions in this module ask the informant about the participant's driving status and details regarding their license status. |
|-----------------|-----------------------------------------------------------------------------------------------------------------------------------|

I will now ask you a few questions about @first\_name@'s ability to use different types of transportation.

|                                                                                                               |                        |                                                                                                                                                     |
|---------------------------------------------------------------------------------------------------------------|------------------------|-----------------------------------------------------------------------------------------------------------------------------------------------------|
| <b>TRA_1</b>                                                                                                  | <b>TRA_DSTATUS_MSI</b> |                                                                                                                                                     |
| <b>[ALWAYS ASK]</b>                                                                                           |                        |                                                                                                                                                     |
| Which of the following describes @first_name@ driving status...? (Include cars, vans, trucks and motorcycles) |                        |                                                                                                                                                     |
| <b>READ LIST, CODE ONLY ONE RESPONSE</b>                                                                      |                        |                                                                                                                                                     |
| NEVER                                                                                                         | 1                      | Never had a driver's license                                                                                                                        |
| FORMER                                                                                                        | 2                      | Had a driver's license at one point in his or her life, but currently does not have it                                                              |
| CURRENT                                                                                                       | 3                      | Has a driver's license without restrictions (except corrective lenses )                                                                             |
| RESTRICTED                                                                                                    | 4                      | Has a driver's license with restrictions on time of driving (daylight only), distance from home, type of road (no highway), or number of passengers |
| DK_NA                                                                                                         | 8                      | <b>[DO NOT READ]</b> Don't know / No answer                                                                                                         |
| REFUSED                                                                                                       | 9                      | <b>[DO NOT READ]</b> Refused                                                                                                                        |

|                                       |                     |                                             |
|---------------------------------------|---------------------|---------------------------------------------|
| <b>TRA_2</b>                          | <b>TRA_STOP_MSI</b> |                                             |
| <b>[ASK IF TRA_STA_MSI = FORMER]</b>  |                     |                                             |
| Why did @first_name@ stop driving...? |                     |                                             |
| <b>CODE ONLY ONE RESPONSE</b>         |                     |                                             |
| VOL_STOP                              | 1                   | Voluntarily stopped driving                 |
| LICS_RESC                             | 2                   | License rescinded                           |
| OT_SP                                 | 3                   | Other (please specify: _____)               |
| DK_NA                                 | 8                   | <b>[DO NOT READ]</b> Don't know / No answer |
| REFUSED                               | 9                   | <b>[DO NOT READ]</b> Refused                |



|                                                            |                |                                                       |
|------------------------------------------------------------|----------------|-------------------------------------------------------|
| TRA_3                                                      | TRA_STOPYR_MSI |                                                       |
| <b>[ASK IF TRA_STA_MSI =FORMER]</b>                        |                |                                                       |
| In what year or at what age did @first_name@ stop driving? |                |                                                       |
| NB_SP                                                      | Age            | _____ <b>[MASK: MIN=00, MAX=CURRENT AGE]</b>          |
| YR_SP                                                      | Year           | _____ <b>[MASK: MIN=BIRTH YEAR, MAX=CURRENT YEAR]</b> |
| DK_NA                                                      | 9998           | <b>[DO NOT READ]</b> Don't know / No answer           |
| REFUSED                                                    | 9999           | <b>[DO NOT READ]</b> Refused                          |

|                                                               |                 |                                                           |
|---------------------------------------------------------------|-----------------|-----------------------------------------------------------|
| TRA_4                                                         | TRA_TRANSIT_MSI |                                                           |
| <b>[ALWAYS ASK]</b>                                           |                 |                                                           |
| How would you describe @first_name@ use of public transit...? |                 |                                                           |
| <b>CODE ONLY ONE RESPONSE</b>                                 |                 |                                                           |
| CURR                                                          | 1               | Currently uses                                            |
| COULD                                                         | 2               | Does not use public transit, but could if they wanted to  |
| CANNOT                                                        | 3               | Does not use public transit and does not think they could |
| DK_NA                                                         | 8               | <b>[DO NOT READ]</b> Don't know / No answer               |
| REFUSED                                                       | 9               | <b>[DO NOT READ]</b> Refused                              |

TRA\_END



## Mild Behavioural Impairment Checklist (MBI)

This module consists of the Mild Behavioural Impairment Checklist developed by Dr. Zahinoor Ismail (University of Calgary).

|          |                                                                                                                                                                                                                                                                                                                                                                                                                                                                                                                                                                                                                                                                                                                                                                                                                                                |
|----------|------------------------------------------------------------------------------------------------------------------------------------------------------------------------------------------------------------------------------------------------------------------------------------------------------------------------------------------------------------------------------------------------------------------------------------------------------------------------------------------------------------------------------------------------------------------------------------------------------------------------------------------------------------------------------------------------------------------------------------------------------------------------------------------------------------------------------------------------|
| Overview | <p>Mild Behavioural Impairment (MBI) refers to neuropsychiatric symptoms which are usually observed before cognitive decline and dementia in individuals aged 50 years and older. MBI describes symptoms of any severity that persist for at least six months, and occur either before or at the same time as mild neurocognitive disorder.</p> <p>The MBI Checklist is a 34-item instrument which can be completed by a patient/participant, close informant, or clinician.</p> <p>The checklist is designed to quantify the severity of behavioural symptoms in multiple domains. Global and domain-specific scores and thresholds have not yet been developed and validated for clinical diagnosis and prognosis. Ongoing validation work will identify scores and thresholds that predict an increased risk of transition to dementia.</p> |
|----------|------------------------------------------------------------------------------------------------------------------------------------------------------------------------------------------------------------------------------------------------------------------------------------------------------------------------------------------------------------------------------------------------------------------------------------------------------------------------------------------------------------------------------------------------------------------------------------------------------------------------------------------------------------------------------------------------------------------------------------------------------------------------------------------------------------------------------------------------|

I will now ask you some questions about @first\_name@’s behaviour. For each question, please answer “yes” if you have noticed this behaviour continuously or on and off for **at least 6 months**, and if it is a **change** from her/his longstanding pattern of behaviour. Otherwise, please answer “no”.

For each question you respond “yes” to indicating a change in behaviour, I will ask you to respond about the severity of the behaviour based on the following options:

- 1) Mild where the change in behaviour is noticeable, but not a significant change;
- 2) Moderate where the change in behaviour is significant, but not a dramatic change;
- 3) Severe where the change in behaviour is marked or prominent, a dramatic change.

If there is more than one behaviour listed in a question, please rate the most severe behavioural change.

The first domain describes interest, motivation, and drive.

| MBI_1                                                                | MBI_INTER_MSI |                                            |
|----------------------------------------------------------------------|---------------|--------------------------------------------|
| <b>[ALWAYS ASK]</b>                                                  |               |                                            |
| Has the person lost interest in friends, family, or home activities? |               |                                            |
| YES                                                                  | 1             | Yes                                        |
| NO                                                                   | 2             | No                                         |
| DK_NA                                                                | 8             | <b>DO NOT READ]</b> Don’t know / No answer |
| REFUSED                                                              | 9             | <b>DO NOT READ]</b> Refused                |





|                                                           |   |                         |   |                                           |   |   |   |   |    |    |    |    |    |    |    |    |    |    |
|-----------------------------------------------------------|---|-------------------------|---|-------------------------------------------|---|---|---|---|----|----|----|----|----|----|----|----|----|----|
| 1                                                         | 2 | 3                       | 4 | 5                                         | 6 | 7 | 8 | 9 | 10 | 11 | 12 | 13 | 14 | 15 | 16 | 17 | 18 | 19 |
| <b>MBI_2</b>                                              |   | <b>MBI_INTERSEV_MSI</b> |   |                                           |   |   |   |   |    |    |    |    |    |    |    |    |    |    |
| <b>[ASK IF MBI_INTER_MSI = Yes]</b>                       |   |                         |   |                                           |   |   |   |   |    |    |    |    |    |    |    |    |    |    |
| How would you describe the severity of this behaviour...? |   |                         |   |                                           |   |   |   |   |    |    |    |    |    |    |    |    |    |    |
| <b>CODE ONLY ONE RESPONSE</b>                             |   |                         |   |                                           |   |   |   |   |    |    |    |    |    |    |    |    |    |    |
| MILD                                                      |   | 1                       |   | Mild                                      |   |   |   |   |    |    |    |    |    |    |    |    |    |    |
| MOD                                                       |   | 2                       |   | Moderate                                  |   |   |   |   |    |    |    |    |    |    |    |    |    |    |
| SEVERE                                                    |   | 3                       |   | Severe                                    |   |   |   |   |    |    |    |    |    |    |    |    |    |    |
| DK_NA                                                     |   | 8                       |   | <b>DO NOT READ</b> Don't know / No answer |   |   |   |   |    |    |    |    |    |    |    |    |    |    |
| REFUSED                                                   |   | 9                       |   | <b>DO NOT READ</b> Refused                |   |   |   |   |    |    |    |    |    |    |    |    |    |    |

|                                                                                              |    |                     |    |                                           |    |    |    |    |    |    |    |    |    |    |    |    |    |    |    |
|----------------------------------------------------------------------------------------------|----|---------------------|----|-------------------------------------------|----|----|----|----|----|----|----|----|----|----|----|----|----|----|----|
| 20                                                                                           | 21 | 22                  | 23 | 24                                        | 25 | 26 | 27 | 28 | 29 | 30 | 31 | 32 | 33 | 34 | 35 | 36 | 37 | 38 | 39 |
| <b>MBI_3</b>                                                                                 |    | <b>MBI_CURI_MSI</b> |    |                                           |    |    |    |    |    |    |    |    |    |    |    |    |    |    |    |
| <b>[ALWAYS ASK]</b>                                                                          |    |                     |    |                                           |    |    |    |    |    |    |    |    |    |    |    |    |    |    |    |
| Does the person lack curiosity in topics that would usually have attracted her/his interest? |    |                     |    |                                           |    |    |    |    |    |    |    |    |    |    |    |    |    |    |    |
| YES                                                                                          |    | 1                   |    | Yes                                       |    |    |    |    |    |    |    |    |    |    |    |    |    |    |    |
| NO                                                                                           |    | 2                   |    | No                                        |    |    |    |    |    |    |    |    |    |    |    |    |    |    |    |
| DK_NA                                                                                        |    | 8                   |    | <b>DO NOT READ</b> Don't know / No answer |    |    |    |    |    |    |    |    |    |    |    |    |    |    |    |
| REFUSED                                                                                      |    | 9                   |    | <b>DO NOT READ</b> Refused                |    |    |    |    |    |    |    |    |    |    |    |    |    |    |    |

|                                                           |    |                        |    |                                           |    |    |    |    |    |    |    |    |    |    |    |    |    |    |    |
|-----------------------------------------------------------|----|------------------------|----|-------------------------------------------|----|----|----|----|----|----|----|----|----|----|----|----|----|----|----|
| 40                                                        | 41 | 42                     | 43 | 44                                        | 45 | 46 | 47 | 48 | 49 | 50 | 51 | 52 | 53 | 54 | 55 | 56 | 57 | 58 | 59 |
| <b>MBI_4</b>                                              |    | <b>MBI_CURISEV_MSI</b> |    |                                           |    |    |    |    |    |    |    |    |    |    |    |    |    |    |    |
| <b>[ASK IF MBI_CURI_MSI = Yes]</b>                        |    |                        |    |                                           |    |    |    |    |    |    |    |    |    |    |    |    |    |    |    |
| How would you describe the severity of this behaviour...? |    |                        |    |                                           |    |    |    |    |    |    |    |    |    |    |    |    |    |    |    |
| <b>CODE ONLY ONE RESPONSE</b>                             |    |                        |    |                                           |    |    |    |    |    |    |    |    |    |    |    |    |    |    |    |
| MILD                                                      |    | 1                      |    | Mild                                      |    |    |    |    |    |    |    |    |    |    |    |    |    |    |    |
| MOD                                                       |    | 2                      |    | Moderate                                  |    |    |    |    |    |    |    |    |    |    |    |    |    |    |    |
| SEVERE                                                    |    | 3                      |    | Severe                                    |    |    |    |    |    |    |    |    |    |    |    |    |    |    |    |
| DK_NA                                                     |    | 8                      |    | <b>DO NOT READ</b> Don't know / No answer |    |    |    |    |    |    |    |    |    |    |    |    |    |    |    |
| REFUSED                                                   |    | 9                      |    | <b>DO NOT READ</b> Refused                |    |    |    |    |    |    |    |    |    |    |    |    |    |    |    |



**CLSA Memory Study Informant Questionnaire**  
v1.1, 2022 October 12

|                                                                                                                              |                     |                                            |
|------------------------------------------------------------------------------------------------------------------------------|---------------------|--------------------------------------------|
| <b>MBI_5</b>                                                                                                                 | <b>MBI_SPON_MSI</b> |                                            |
| <b>[ALWAYS ASK]</b>                                                                                                          |                     |                                            |
| Has the person become less spontaneous and active – for example, is she/he less likely to initiate or maintain conversation? |                     |                                            |
| YES                                                                                                                          | 1                   | Yes                                        |
| NO                                                                                                                           | 2                   | No                                         |
| DK_NA                                                                                                                        | 8                   | <b>DO NOT READ]</b> Don't know / No answer |
| REFUSED                                                                                                                      | 9                   | <b>DO NOT READ]</b> Refused                |

|                                                           |                        |                                            |
|-----------------------------------------------------------|------------------------|--------------------------------------------|
| <b>MBI_6</b>                                              | <b>MBI_SPONSEV_MSI</b> |                                            |
| <b>[ASK IF MBI_SPON_MSI = Yes]</b>                        |                        |                                            |
| How would you describe the severity of this behaviour...? |                        |                                            |
| <b>CODE ONLY ONE RESPONSE</b>                             |                        |                                            |
| MILD                                                      | 1                      | Mild                                       |
| MOD                                                       | 2                      | Moderate                                   |
| SEVERE                                                    | 3                      | Severe                                     |
| DK_NA                                                     | 8                      | <b>DO NOT READ]</b> Don't know / No answer |
| REFUSED                                                   | 9                      | <b>DO NOT READ]</b> Refused                |

|                                                                           |                     |                                            |
|---------------------------------------------------------------------------|---------------------|--------------------------------------------|
| <b>MBI_7</b>                                                              | <b>MBI_MOTI_MSI</b> |                                            |
| <b>[ALWAYS ASK]</b>                                                       |                     |                                            |
| Has the person lost motivation to act on her/his obligations or interest? |                     |                                            |
| YES                                                                       | 1                   | Yes                                        |
| NO                                                                        | 2                   | No                                         |
| DK_NA                                                                     | 8                   | <b>DO NOT READ]</b> Don't know / No answer |
| REFUSED                                                                   | 9                   | <b>DO NOT READ]</b> Refused                |



|                                                           |   |                        |   |                                           |   |   |   |   |    |    |    |    |    |    |    |    |    |    |
|-----------------------------------------------------------|---|------------------------|---|-------------------------------------------|---|---|---|---|----|----|----|----|----|----|----|----|----|----|
| 1                                                         | 2 | 3                      | 4 | 5                                         | 6 | 7 | 8 | 9 | 10 | 11 | 12 | 13 | 14 | 15 | 16 | 17 | 18 | 19 |
| <b>MBI_8</b>                                              |   | <b>MBI_MOTISEV_MSI</b> |   |                                           |   |   |   |   |    |    |    |    |    |    |    |    |    |    |
| <b>[ASK IF MBI_MOTI_MSI = Yes]</b>                        |   |                        |   |                                           |   |   |   |   |    |    |    |    |    |    |    |    |    |    |
| How would you describe the severity of this behaviour...? |   |                        |   |                                           |   |   |   |   |    |    |    |    |    |    |    |    |    |    |
| <b>CODE ONLY ONE RESPONSE</b>                             |   |                        |   |                                           |   |   |   |   |    |    |    |    |    |    |    |    |    |    |
| MILD                                                      |   | 1                      |   | Mild                                      |   |   |   |   |    |    |    |    |    |    |    |    |    |    |
| MOD                                                       |   | 2                      |   | Moderate                                  |   |   |   |   |    |    |    |    |    |    |    |    |    |    |
| SEVERE                                                    |   | 3                      |   | Severe                                    |   |   |   |   |    |    |    |    |    |    |    |    |    |    |
| DK_NA                                                     |   | 8                      |   | <b>DO NOT READ</b> Don't know / No answer |   |   |   |   |    |    |    |    |    |    |    |    |    |    |
| REFUSED                                                   |   | 9                      |   | <b>DO NOT READ</b> Refused                |   |   |   |   |    |    |    |    |    |    |    |    |    |    |

|                                                                                                 |    |                     |    |                                           |    |    |    |    |    |    |    |    |
|-------------------------------------------------------------------------------------------------|----|---------------------|----|-------------------------------------------|----|----|----|----|----|----|----|----|
| 20                                                                                              | 21 | 22                  | 23 | 24                                        | 25 | 26 | 27 | 28 | 29 | 30 | 31 | 32 |
| <b>MBI_9</b>                                                                                    |    | <b>MBI_EMOT_MSI</b> |    |                                           |    |    |    |    |    |    |    |    |
| <b>[ALWAYS ASK]</b>                                                                             |    |                     |    |                                           |    |    |    |    |    |    |    |    |
| Is the person less affectionate and/or lacking in emotions when compared to her/his usual self? |    |                     |    |                                           |    |    |    |    |    |    |    |    |
| YES                                                                                             |    | 1                   |    | Yes                                       |    |    |    |    |    |    |    |    |
| NO                                                                                              |    | 2                   |    | No                                        |    |    |    |    |    |    |    |    |
| DK_NA                                                                                           |    | 8                   |    | <b>DO NOT READ</b> Don't know / No answer |    |    |    |    |    |    |    |    |
| REFUSED                                                                                         |    | 9                   |    | <b>DO NOT READ</b> Refused                |    |    |    |    |    |    |    |    |

|                                                           |    |                        |    |                                           |    |    |    |    |    |    |    |    |    |    |    |    |    |    |    |    |    |    |    |    |    |    |    |
|-----------------------------------------------------------|----|------------------------|----|-------------------------------------------|----|----|----|----|----|----|----|----|----|----|----|----|----|----|----|----|----|----|----|----|----|----|----|
| 33                                                        | 34 | 35                     | 36 | 37                                        | 38 | 39 | 40 | 41 | 42 | 43 | 44 | 45 | 46 | 47 | 48 | 49 | 50 | 51 | 52 | 53 | 54 | 55 | 56 | 57 | 58 | 59 | 60 |
| <b>MBI_10</b>                                             |    | <b>MBI_EMOTSEV_MSI</b> |    |                                           |    |    |    |    |    |    |    |    |    |    |    |    |    |    |    |    |    |    |    |    |    |    |    |
| <b>[ASK IF MBI_EMOT_MSI = Yes]</b>                        |    |                        |    |                                           |    |    |    |    |    |    |    |    |    |    |    |    |    |    |    |    |    |    |    |    |    |    |    |
| How would you describe the severity of this behaviour...? |    |                        |    |                                           |    |    |    |    |    |    |    |    |    |    |    |    |    |    |    |    |    |    |    |    |    |    |    |
| <b>CODE ONLY ONE RESPONSE</b>                             |    |                        |    |                                           |    |    |    |    |    |    |    |    |    |    |    |    |    |    |    |    |    |    |    |    |    |    |    |
| MILD                                                      |    | 1                      |    | Mild                                      |    |    |    |    |    |    |    |    |    |    |    |    |    |    |    |    |    |    |    |    |    |    |    |
| MOD                                                       |    | 2                      |    | Moderate                                  |    |    |    |    |    |    |    |    |    |    |    |    |    |    |    |    |    |    |    |    |    |    |    |
| SEVERE                                                    |    | 3                      |    | Severe                                    |    |    |    |    |    |    |    |    |    |    |    |    |    |    |    |    |    |    |    |    |    |    |    |
| DK_NA                                                     |    | 8                      |    | <b>DO NOT READ</b> Don't know / No answer |    |    |    |    |    |    |    |    |    |    |    |    |    |    |    |    |    |    |    |    |    |    |    |
| REFUSED                                                   |    | 9                      |    | <b>DO NOT READ</b> Refused                |    |    |    |    |    |    |    |    |    |    |    |    |    |    |    |    |    |    |    |    |    |    |    |



CLSA Memory Study Informant Questionnaire  
v1.1, 2022 October 12

|                                            |              |   |                                            |   |   |   |   |   |    |    |    |    |    |    |
|--------------------------------------------|--------------|---|--------------------------------------------|---|---|---|---|---|----|----|----|----|----|----|
| 1                                          | 2            | 3 | 4                                          | 5 | 6 | 7 | 8 | 9 | 10 | 11 | 12 | 13 | 14 | 15 |
| MBI_11                                     | MBI_CARE_MSI |   |                                            |   |   |   |   |   |    |    |    |    |    |    |
| [ALWAYS ASK]                               |              |   |                                            |   |   |   |   |   |    |    |    |    |    |    |
| Does she/he no longer care about anything? |              |   |                                            |   |   |   |   |   |    |    |    |    |    |    |
| YES                                        |              | 1 | Yes                                        |   |   |   |   |   |    |    |    |    |    |    |
| NO                                         |              | 2 | No                                         |   |   |   |   |   |    |    |    |    |    |    |
| DK_NA                                      |              | 8 | <b>DO NOT READ]</b> Don't know / No answer |   |   |   |   |   |    |    |    |    |    |    |
| REFUSED                                    |              | 9 | <b>DO NOT READ]</b> Refused                |   |   |   |   |   |    |    |    |    |    |    |

|                                                           |                 |    |                                            |    |    |    |    |    |    |    |    |    |    |    |
|-----------------------------------------------------------|-----------------|----|--------------------------------------------|----|----|----|----|----|----|----|----|----|----|----|
| 16                                                        | 17              | 18 | 19                                         | 20 | 21 | 22 | 23 | 24 | 25 | 26 | 27 | 28 | 29 | 30 |
| MBI_12                                                    | MBI_CARESEV_MSI |    |                                            |    |    |    |    |    |    |    |    |    |    |    |
| [ASK IF MBI_CARE_MSI = Yes]                               |                 |    |                                            |    |    |    |    |    |    |    |    |    |    |    |
| How would you describe the severity of this behaviour...? |                 |    |                                            |    |    |    |    |    |    |    |    |    |    |    |
| <b>CODE ONLY ONE RESPONSE</b>                             |                 |    |                                            |    |    |    |    |    |    |    |    |    |    |    |
| MILD                                                      |                 | 1  | Mild                                       |    |    |    |    |    |    |    |    |    |    |    |
| MOD                                                       |                 | 2  | Moderate                                   |    |    |    |    |    |    |    |    |    |    |    |
| SEVERE                                                    |                 | 3  | Severe                                     |    |    |    |    |    |    |    |    |    |    |    |
| DK_NA                                                     |                 | 8  | <b>DO NOT READ]</b> Don't know / No answer |    |    |    |    |    |    |    |    |    |    |    |
| REFUSED                                                   |                 | 9  | <b>DO NOT READ]</b> Refused                |    |    |    |    |    |    |    |    |    |    |    |

The second domain describes mood or anxiety symptoms.

**Interviewer note, remind the respondent if required:** For each questions you respond “yes” to indicating a change in behaviour, I will ask you to respond about the severity of the behaviour based on the following options:

- 1) Mild where the change in behaviour is noticeable, but not a significant change;
- 2) Moderate where the change in behaviour is significant, but not a dramatic change;
- 3) Severe where the change in behaviour is marked or prominent, a dramatic change.

If there is more than one behaviour listed in a question, please rate the most severe behavioural change.

|                                                                                                            |             |    |                                            |    |    |    |    |    |    |    |    |    |    |    |
|------------------------------------------------------------------------------------------------------------|-------------|----|--------------------------------------------|----|----|----|----|----|----|----|----|----|----|----|
| 43                                                                                                         | 44          | 45 | 46                                         | 47 | 48 | 49 | 50 | 51 | 52 | 53 | 54 | 55 | 56 | 57 |
| MBI_13                                                                                                     | MBI_SAD_MSI |    |                                            |    |    |    |    |    |    |    |    |    |    |    |
| [ALWAYS ASK]                                                                                               |             |    |                                            |    |    |    |    |    |    |    |    |    |    |    |
| Has the person developed sadness or appear to be in low spirits? Does she/he have episodes of tearfulness? |             |    |                                            |    |    |    |    |    |    |    |    |    |    |    |
| YES                                                                                                        |             | 1  | Yes                                        |    |    |    |    |    |    |    |    |    |    |    |
| NO                                                                                                         |             | 2  | No                                         |    |    |    |    |    |    |    |    |    |    |    |
| DK_NA                                                                                                      |             | 8  | <b>DO NOT READ]</b> Don't know / No answer |    |    |    |    |    |    |    |    |    |    |    |
| REFUSED                                                                                                    |             | 9  | <b>DO NOT READ]</b> Refused                |    |    |    |    |    |    |    |    |    |    |    |



|                                                           |   |                       |   |                                           |   |   |   |   |    |    |    |    |    |    |    |    |
|-----------------------------------------------------------|---|-----------------------|---|-------------------------------------------|---|---|---|---|----|----|----|----|----|----|----|----|
| 1                                                         | 2 | 3                     | 4 | 5                                         | 6 | 7 | 8 | 9 | 10 | 11 | 12 | 13 | 14 | 15 | 16 | 17 |
| <b>MBI_14</b>                                             |   | <b>MBI_SADSEV_MSI</b> |   |                                           |   |   |   |   |    |    |    |    |    |    |    |    |
| <b>[ASK IF MBI_SAD_MSI = Yes]</b>                         |   |                       |   |                                           |   |   |   |   |    |    |    |    |    |    |    |    |
| How would you describe the severity of this behaviour...? |   |                       |   |                                           |   |   |   |   |    |    |    |    |    |    |    |    |
| <b>CODE ONLY ONE RESPONSE</b>                             |   |                       |   |                                           |   |   |   |   |    |    |    |    |    |    |    |    |
| MILD                                                      |   | 1                     |   | Mild                                      |   |   |   |   |    |    |    |    |    |    |    |    |
| MOD                                                       |   | 2                     |   | Moderate                                  |   |   |   |   |    |    |    |    |    |    |    |    |
| SEVERE                                                    |   | 3                     |   | Severe                                    |   |   |   |   |    |    |    |    |    |    |    |    |
| DK_NA                                                     |   | 8                     |   | <b>DO NOT READ</b> Don't know / No answer |   |   |   |   |    |    |    |    |    |    |    |    |
| REFUSED                                                   |   | 9                     |   | <b>DO NOT READ</b> Refused                |   |   |   |   |    |    |    |    |    |    |    |    |

|                                                         |    |                     |    |                                           |    |    |    |    |    |    |    |    |    |    |
|---------------------------------------------------------|----|---------------------|----|-------------------------------------------|----|----|----|----|----|----|----|----|----|----|
| 18                                                      | 19 | 20                  | 21 | 22                                        | 23 | 24 | 25 | 26 | 27 | 28 | 29 | 30 | 31 | 32 |
| <b>MBI_15</b>                                           |    | <b>MBI_PLES_MSI</b> |    |                                           |    |    |    |    |    |    |    |    |    |    |
| <b>[ALWAYS ASK]</b>                                     |    |                     |    |                                           |    |    |    |    |    |    |    |    |    |    |
| Has the person become less able to experience pleasure? |    |                     |    |                                           |    |    |    |    |    |    |    |    |    |    |
| YES                                                     |    | 1                   |    | Yes                                       |    |    |    |    |    |    |    |    |    |    |
| NO                                                      |    | 2                   |    | No                                        |    |    |    |    |    |    |    |    |    |    |
| DK_NA                                                   |    | 8                   |    | <b>DO NOT READ</b> Don't know / No answer |    |    |    |    |    |    |    |    |    |    |
| REFUSED                                                 |    | 9                   |    | <b>DO NOT READ</b> Refused                |    |    |    |    |    |    |    |    |    |    |

|                                                           |    |                        |    |                                           |    |    |    |    |    |    |    |    |    |    |    |    |    |    |    |    |    |    |    |    |    |    |    |
|-----------------------------------------------------------|----|------------------------|----|-------------------------------------------|----|----|----|----|----|----|----|----|----|----|----|----|----|----|----|----|----|----|----|----|----|----|----|
| 33                                                        | 34 | 35                     | 36 | 37                                        | 38 | 39 | 40 | 41 | 42 | 43 | 44 | 45 | 46 | 47 | 48 | 49 | 50 | 51 | 52 | 53 | 54 | 55 | 56 | 57 | 58 | 59 | 60 |
| <b>MBI_16</b>                                             |    | <b>MBI_PLESSEV_MSI</b> |    |                                           |    |    |    |    |    |    |    |    |    |    |    |    |    |    |    |    |    |    |    |    |    |    |    |
| <b>[ASK IF MBI_PLES_MSI = Yes]</b>                        |    |                        |    |                                           |    |    |    |    |    |    |    |    |    |    |    |    |    |    |    |    |    |    |    |    |    |    |    |
| How would you describe the severity of this behaviour...? |    |                        |    |                                           |    |    |    |    |    |    |    |    |    |    |    |    |    |    |    |    |    |    |    |    |    |    |    |
| <b>CODE ONLY ONE RESPONSE</b>                             |    |                        |    |                                           |    |    |    |    |    |    |    |    |    |    |    |    |    |    |    |    |    |    |    |    |    |    |    |
| MILD                                                      |    | 1                      |    | Mild                                      |    |    |    |    |    |    |    |    |    |    |    |    |    |    |    |    |    |    |    |    |    |    |    |
| MOD                                                       |    | 2                      |    | Moderate                                  |    |    |    |    |    |    |    |    |    |    |    |    |    |    |    |    |    |    |    |    |    |    |    |
| SEVERE                                                    |    | 3                      |    | Severe                                    |    |    |    |    |    |    |    |    |    |    |    |    |    |    |    |    |    |    |    |    |    |    |    |
| DK_NA                                                     |    | 8                      |    | <b>DO NOT READ</b> Don't know / No answer |    |    |    |    |    |    |    |    |    |    |    |    |    |    |    |    |    |    |    |    |    |    |    |
| REFUSED                                                   |    | 9                      |    | <b>DO NOT READ</b> Refused                |    |    |    |    |    |    |    |    |    |    |    |    |    |    |    |    |    |    |    |    |    |    |    |



**CLSA Memory Study Informant Questionnaire**  
v1.1, 2022 October 12

|                                                                                        |                     |                                            |
|----------------------------------------------------------------------------------------|---------------------|--------------------------------------------|
| <b>MBI_17</b>                                                                          | <b>MBI_DISC_MSI</b> |                                            |
| <b>[ALWAYS ASK]</b>                                                                    |                     |                                            |
| Has the person become discouraged about their future or feel that she/he is a failure? |                     |                                            |
| YES                                                                                    | 1                   | Yes                                        |
| NO                                                                                     | 2                   | No                                         |
| DK_NA                                                                                  | 8                   | <b>DO NOT READ]</b> Don't know / No answer |
| REFUSED                                                                                | 9                   | <b>DO NOT READ]</b> Refused                |

|                                                           |                        |                                            |
|-----------------------------------------------------------|------------------------|--------------------------------------------|
| <b>MBI_18</b>                                             | <b>MBI_DISCSEV_MSI</b> |                                            |
| <b>[ASK IF MBI_DISC_MSI = Yes]</b>                        |                        |                                            |
| How would you describe the severity of this behaviour...? |                        |                                            |
| <b>CODE ONLY ONE RESPONSE</b>                             |                        |                                            |
| MILD                                                      | 1                      | Mild                                       |
| MOD                                                       | 2                      | Moderate                                   |
| SEVERE                                                    | 3                      | Severe                                     |
| DK_NA                                                     | 8                      | <b>DO NOT READ]</b> Don't know / No answer |
| REFUSED                                                   | 9                      | <b>DO NOT READ]</b> Refused                |

|                                                             |                     |                                            |
|-------------------------------------------------------------|---------------------|--------------------------------------------|
| <b>MBI_19</b>                                               | <b>MBI_BURD_MSI</b> |                                            |
| <b>[ALWAYS ASK]</b>                                         |                     |                                            |
| Does the person view herself/himself as a burden to family? |                     |                                            |
| YES                                                         | 1                   | Yes                                        |
| NO                                                          | 2                   | No                                         |
| DK_NA                                                       | 8                   | <b>DO NOT READ]</b> Don't know / No answer |
| REFUSED                                                     | 9                   | <b>DO NOT READ]</b> Refused                |



|                                                           |   |                        |   |                                           |   |   |   |   |    |    |    |    |    |    |    |    |    |    |
|-----------------------------------------------------------|---|------------------------|---|-------------------------------------------|---|---|---|---|----|----|----|----|----|----|----|----|----|----|
| 1                                                         | 2 | 3                      | 4 | 5                                         | 6 | 7 | 8 | 9 | 10 | 11 | 12 | 13 | 14 | 15 | 16 | 17 | 18 | 19 |
| <b>MBI_20</b>                                             |   | <b>MBI_BURDSEV_MSI</b> |   |                                           |   |   |   |   |    |    |    |    |    |    |    |    |    |    |
| <b>[ASK IF MBI_BURD_MSI = Yes]</b>                        |   |                        |   |                                           |   |   |   |   |    |    |    |    |    |    |    |    |    |    |
| How would you describe the severity of this behaviour...? |   |                        |   |                                           |   |   |   |   |    |    |    |    |    |    |    |    |    |    |
| <b>CODE ONLY ONE RESPONSE</b>                             |   |                        |   |                                           |   |   |   |   |    |    |    |    |    |    |    |    |    |    |
| MILD                                                      |   | 1                      |   | Mild                                      |   |   |   |   |    |    |    |    |    |    |    |    |    |    |
| MOD                                                       |   | 2                      |   | Moderate                                  |   |   |   |   |    |    |    |    |    |    |    |    |    |    |
| SEVERE                                                    |   | 3                      |   | Severe                                    |   |   |   |   |    |    |    |    |    |    |    |    |    |    |
| DK_NA                                                     |   | 8                      |   | <b>DO NOT READ</b> Don't know / No answer |   |   |   |   |    |    |    |    |    |    |    |    |    |    |
| REFUSED                                                   |   | 9                      |   | <b>DO NOT READ</b> Refused                |   |   |   |   |    |    |    |    |    |    |    |    |    |    |

|                                                                                                          |    |                    |    |                                           |    |    |    |    |    |    |    |    |    |    |    |    |    |    |    |
|----------------------------------------------------------------------------------------------------------|----|--------------------|----|-------------------------------------------|----|----|----|----|----|----|----|----|----|----|----|----|----|----|----|
| 20                                                                                                       | 21 | 22                 | 23 | 24                                        | 25 | 26 | 27 | 28 | 29 | 30 | 31 | 32 | 33 | 34 | 35 | 36 | 37 | 38 | 39 |
| <b>MBI_21</b>                                                                                            |    | <b>MBI_ANX_MSI</b> |    |                                           |    |    |    |    |    |    |    |    |    |    |    |    |    |    |    |
| <b>[ALWAYS ASK]</b>                                                                                      |    |                    |    |                                           |    |    |    |    |    |    |    |    |    |    |    |    |    |    |    |
| Has the person become more anxious or worried about things that are routine (e.g. events, visits, etc.)? |    |                    |    |                                           |    |    |    |    |    |    |    |    |    |    |    |    |    |    |    |
| YES                                                                                                      |    | 1                  |    | Yes                                       |    |    |    |    |    |    |    |    |    |    |    |    |    |    |    |
| NO                                                                                                       |    | 2                  |    | No                                        |    |    |    |    |    |    |    |    |    |    |    |    |    |    |    |
| DK_NA                                                                                                    |    | 8                  |    | <b>DO NOT READ</b> Don't know / No answer |    |    |    |    |    |    |    |    |    |    |    |    |    |    |    |
| REFUSED                                                                                                  |    | 9                  |    | <b>DO NOT READ</b> Refused                |    |    |    |    |    |    |    |    |    |    |    |    |    |    |    |

|                                                           |    |                       |    |                                           |    |    |    |    |    |    |    |    |    |    |    |    |    |    |    |
|-----------------------------------------------------------|----|-----------------------|----|-------------------------------------------|----|----|----|----|----|----|----|----|----|----|----|----|----|----|----|
| 40                                                        | 41 | 42                    | 43 | 44                                        | 45 | 46 | 47 | 48 | 49 | 50 | 51 | 52 | 53 | 54 | 55 | 56 | 57 | 58 | 59 |
| <b>MBI_22</b>                                             |    | <b>MBI_ANXSEV_MSI</b> |    |                                           |    |    |    |    |    |    |    |    |    |    |    |    |    |    |    |
| <b>[ASK IF MBI_ANX_MSI = Yes]</b>                         |    |                       |    |                                           |    |    |    |    |    |    |    |    |    |    |    |    |    |    |    |
| How would you describe the severity of this behaviour...? |    |                       |    |                                           |    |    |    |    |    |    |    |    |    |    |    |    |    |    |    |
| <b>CODE ONLY ONE RESPONSE</b>                             |    |                       |    |                                           |    |    |    |    |    |    |    |    |    |    |    |    |    |    |    |
| MILD                                                      |    | 1                     |    | Mild                                      |    |    |    |    |    |    |    |    |    |    |    |    |    |    |    |
| MOD                                                       |    | 2                     |    | Moderate                                  |    |    |    |    |    |    |    |    |    |    |    |    |    |    |    |
| SEVERE                                                    |    | 3                     |    | Severe                                    |    |    |    |    |    |    |    |    |    |    |    |    |    |    |    |
| DK_NA                                                     |    | 8                     |    | <b>DO NOT READ</b> Don't know / No answer |    |    |    |    |    |    |    |    |    |    |    |    |    |    |    |
| REFUSED                                                   |    | 9                     |    | <b>DO NOT READ</b> Refused                |    |    |    |    |    |    |    |    |    |    |    |    |    |    |    |



**CLSA Memory Study Informant Questionnaire**  
v1.1, 2022 October 12

|                                                                                                              |                      |                                            |
|--------------------------------------------------------------------------------------------------------------|----------------------|--------------------------------------------|
| <b>MBI_23</b>                                                                                                | <b>MBI_TENSE_MSI</b> |                                            |
| <b>[ALWAYS ASK]</b>                                                                                          |                      |                                            |
| Does the person feel very tense, having developed an inability to relax, or shakiness, or symptoms of panic? |                      |                                            |
| YES                                                                                                          | 1                    | Yes                                        |
| NO                                                                                                           | 2                    | No                                         |
| DK_NA                                                                                                        | 8                    | <b>DO NOT READ]</b> Don't know / No answer |
| REFUSED                                                                                                      | 9                    | <b>DO NOT READ]</b> Refused                |

|                                                           |                         |                                            |
|-----------------------------------------------------------|-------------------------|--------------------------------------------|
| <b>MBI_24</b>                                             | <b>MBI_TENSESEV_MSI</b> |                                            |
| <b>[ASK IF MBI_TENSE_MSI = Yes]</b>                       |                         |                                            |
| How would you describe the severity of this behaviour...? |                         |                                            |
| <b>CODE ONLY ONE RESPONSE</b>                             |                         |                                            |
| MILD                                                      | 1                       | Mild                                       |
| MOD                                                       | 2                       | Moderate                                   |
| SEVERE                                                    | 3                       | Severe                                     |
| DK_NA                                                     | 8                       | <b>DO NOT READ]</b> Don't know / No answer |
| REFUSED                                                   | 9                       | <b>DO NOT READ]</b> Refused                |

The third domain describes the ability to delay gratification and control behaviour, impulses, oral intake and/or changes in reward.

**Interviewer note, remind the respondent if required:** For each questions you respond “yes” to indicating a change in behaviour, I will ask you to respond about the severity of the behaviour based on the following options:

- 1) Mild where the change in behaviour is noticeable, but not a significant change;
- 2) Moderate where the change in behaviour is significant, but not a dramatic change;
- 3) Severe where the change in behaviour is marked or prominent, a dramatic change.

If there is more than one behaviour listed in a question, please rate the most severe behavioural change.

|                                                                          |                     |                                            |
|--------------------------------------------------------------------------|---------------------|--------------------------------------------|
| <b>MBI_25</b>                                                            | <b>MBI_AGGR_MSI</b> |                                            |
| <b>[ALWAYS ASK]</b>                                                      |                     |                                            |
| Has the person become agitated, aggressive, irritable, or temperamental? |                     |                                            |
| YES                                                                      | 1                   | Yes                                        |
| NO                                                                       | 2                   | No                                         |
| DK_NA                                                                    | 8                   | <b>DO NOT READ]</b> Don't know / No answer |
| REFUSED                                                                  | 9                   | <b>DO NOT READ]</b> Refused                |





|                                                           |   |                        |   |                                            |   |   |   |   |    |    |    |    |    |    |    |    |    |    |    |    |
|-----------------------------------------------------------|---|------------------------|---|--------------------------------------------|---|---|---|---|----|----|----|----|----|----|----|----|----|----|----|----|
| 1                                                         | 2 | 3                      | 4 | 5                                          | 6 | 7 | 8 | 9 | 10 | 11 | 12 | 13 | 14 | 15 | 16 | 17 | 18 | 19 | 20 | 21 |
| <b>MBI_26</b>                                             |   | <b>MBI_AGGRSEV_MSI</b> |   |                                            |   |   |   |   |    |    |    |    |    |    |    |    |    |    |    |    |
| <b>[ASK IF MBI_AGGR_MSI = Yes]</b>                        |   |                        |   |                                            |   |   |   |   |    |    |    |    |    |    |    |    |    |    |    |    |
| How would you describe the severity of this behaviour...? |   |                        |   |                                            |   |   |   |   |    |    |    |    |    |    |    |    |    |    |    |    |
| <b>CODE ONLY ONE RESPONSE</b>                             |   |                        |   |                                            |   |   |   |   |    |    |    |    |    |    |    |    |    |    |    |    |
| MILD                                                      |   | 1                      |   | Mild                                       |   |   |   |   |    |    |    |    |    |    |    |    |    |    |    |    |
| MOD                                                       |   | 2                      |   | Moderate                                   |   |   |   |   |    |    |    |    |    |    |    |    |    |    |    |    |
| SEVERE                                                    |   | 3                      |   | Severe                                     |   |   |   |   |    |    |    |    |    |    |    |    |    |    |    |    |
| DK_NA                                                     |   | 8                      |   | <b>DO NOT READ]</b> Don't know / No answer |   |   |   |   |    |    |    |    |    |    |    |    |    |    |    |    |
| REFUSED                                                   |   | 9                      |   | <b>DO NOT READ]</b> Refused                |   |   |   |   |    |    |    |    |    |    |    |    |    |    |    |    |

|                                                                       |    |                     |    |                                            |    |    |    |    |    |    |    |    |    |    |    |    |    |    |    |    |
|-----------------------------------------------------------------------|----|---------------------|----|--------------------------------------------|----|----|----|----|----|----|----|----|----|----|----|----|----|----|----|----|
| 22                                                                    | 23 | 24                  | 25 | 26                                         | 27 | 28 | 29 | 30 | 31 | 32 | 33 | 34 | 35 | 36 | 37 | 38 | 39 | 40 | 41 | 42 |
| <b>MBI_27</b>                                                         |    | <b>MBI_ARGU_MSI</b> |    |                                            |    |    |    |    |    |    |    |    |    |    |    |    |    |    |    |    |
| <b>[ALWAYS ASK]</b>                                                   |    |                     |    |                                            |    |    |    |    |    |    |    |    |    |    |    |    |    |    |    |    |
| Has she/he become unreasonably or uncharacteristically argumentative? |    |                     |    |                                            |    |    |    |    |    |    |    |    |    |    |    |    |    |    |    |    |
| YES                                                                   |    | 1                   |    | Yes                                        |    |    |    |    |    |    |    |    |    |    |    |    |    |    |    |    |
| NO                                                                    |    | 2                   |    | No                                         |    |    |    |    |    |    |    |    |    |    |    |    |    |    |    |    |
| DK_NA                                                                 |    | 8                   |    | <b>DO NOT READ]</b> Don't know / No answer |    |    |    |    |    |    |    |    |    |    |    |    |    |    |    |    |
| REFUSED                                                               |    | 9                   |    | <b>DO NOT READ]</b> Refused                |    |    |    |    |    |    |    |    |    |    |    |    |    |    |    |    |

|                                                           |    |                        |    |                                            |    |    |    |    |    |    |    |    |    |    |    |    |    |    |    |    |
|-----------------------------------------------------------|----|------------------------|----|--------------------------------------------|----|----|----|----|----|----|----|----|----|----|----|----|----|----|----|----|
| 35                                                        | 36 | 37                     | 38 | 39                                         | 40 | 41 | 42 | 43 | 44 | 45 | 46 | 47 | 48 | 49 | 50 | 51 | 52 | 53 | 54 | 55 |
| <b>MBI_28</b>                                             |    | <b>MBI_ARGUSEV_MSI</b> |    |                                            |    |    |    |    |    |    |    |    |    |    |    |    |    |    |    |    |
| <b>[ASK IF MBI_ARGU_MSI = Yes]</b>                        |    |                        |    |                                            |    |    |    |    |    |    |    |    |    |    |    |    |    |    |    |    |
| How would you describe the severity of this behaviour...? |    |                        |    |                                            |    |    |    |    |    |    |    |    |    |    |    |    |    |    |    |    |
| <b>CODE ONLY ONE RESPONSE</b>                             |    |                        |    |                                            |    |    |    |    |    |    |    |    |    |    |    |    |    |    |    |    |
| MILD                                                      |    | 1                      |    | Mild                                       |    |    |    |    |    |    |    |    |    |    |    |    |    |    |    |    |
| MOD                                                       |    | 2                      |    | Moderate                                   |    |    |    |    |    |    |    |    |    |    |    |    |    |    |    |    |
| SEVERE                                                    |    | 3                      |    | Severe                                     |    |    |    |    |    |    |    |    |    |    |    |    |    |    |    |    |
| DK_NA                                                     |    | 8                      |    | <b>DO NOT READ]</b> Don't know / No answer |    |    |    |    |    |    |    |    |    |    |    |    |    |    |    |    |
| REFUSED                                                   |    | 9                      |    | <b>DO NOT READ]</b> Refused                |    |    |    |    |    |    |    |    |    |    |    |    |    |    |    |    |



**CLSA Memory Study Informant Questionnaire**  
v1.1, 2022 October 12

|                                                                                  |                     |                                            |
|----------------------------------------------------------------------------------|---------------------|--------------------------------------------|
| <b>MBI_29</b>                                                                    | <b>MBI_IMPU_MSI</b> |                                            |
| <b>[ALWAYS ASK]</b>                                                              |                     |                                            |
| Has the person become more impulsive, seeming to act without considering things? |                     |                                            |
| YES                                                                              | 1                   | Yes                                        |
| NO                                                                               | 2                   | No                                         |
| DK_NA                                                                            | 8                   | <b>DO NOT READ]</b> Don't know / No answer |
| REFUSED                                                                          | 9                   | <b>DO NOT READ]</b> Refused                |

|                                                           |                        |                                            |
|-----------------------------------------------------------|------------------------|--------------------------------------------|
| <b>MBI_20</b>                                             | <b>MBI_IMPUSEV_MSI</b> |                                            |
| <b>[ASK IF MBI_IMPU_MSI = Yes]</b>                        |                        |                                            |
| How would you describe the severity of this behaviour...? |                        |                                            |
| <b>CODE ONLY ONE RESPONSE</b>                             |                        |                                            |
| MILD                                                      | 1                      | Mild                                       |
| MOD                                                       | 2                      | Moderate                                   |
| SEVERE                                                    | 3                      | Severe                                     |
| DK_NA                                                     | 8                      | <b>DO NOT READ]</b> Don't know / No answer |
| REFUSED                                                   | 9                      | <b>DO NOT READ]</b> Refused                |

|                                                                                                                                                                                                |                     |                                            |
|------------------------------------------------------------------------------------------------------------------------------------------------------------------------------------------------|---------------------|--------------------------------------------|
| <b>MBI_31</b>                                                                                                                                                                                  | <b>MBI_DISI_MSI</b> |                                            |
| <b>[ALWAYS ASK]</b>                                                                                                                                                                            |                     |                                            |
| Does the person display sexually disinhibited or intrusive behaviour, such as touching (themselves/others), hugging, groping, etc., in a manner that is out of character or may cause offense? |                     |                                            |
| YES                                                                                                                                                                                            | 1                   | Yes                                        |
| NO                                                                                                                                                                                             | 2                   | No                                         |
| DK_NA                                                                                                                                                                                          | 8                   | <b>DO NOT READ]</b> Don't know / No answer |
| REFUSED                                                                                                                                                                                        | 9                   | <b>DO NOT READ]</b> Refused                |



|                                                           |   |                        |   |                                           |   |   |   |   |    |    |    |    |    |    |    |    |
|-----------------------------------------------------------|---|------------------------|---|-------------------------------------------|---|---|---|---|----|----|----|----|----|----|----|----|
| 1                                                         | 2 | 3                      | 4 | 5                                         | 6 | 7 | 8 | 9 | 10 | 11 | 12 | 13 | 14 | 15 | 16 | 17 |
| <b>MBI_32</b>                                             |   | <b>MBI_DISISEV_MSI</b> |   |                                           |   |   |   |   |    |    |    |    |    |    |    |    |
| <b>[ASK IF MBI_DISI_MSI = Yes]</b>                        |   |                        |   |                                           |   |   |   |   |    |    |    |    |    |    |    |    |
| How would you describe the severity of this behaviour...? |   |                        |   |                                           |   |   |   |   |    |    |    |    |    |    |    |    |
| <b>CODE ONLY ONE RESPONSE</b>                             |   |                        |   |                                           |   |   |   |   |    |    |    |    |    |    |    |    |
| MILD                                                      |   | 1                      |   | Mild                                      |   |   |   |   |    |    |    |    |    |    |    |    |
| MOD                                                       |   | 2                      |   | Moderate                                  |   |   |   |   |    |    |    |    |    |    |    |    |
| SEVERE                                                    |   | 3                      |   | Severe                                    |   |   |   |   |    |    |    |    |    |    |    |    |
| DK_NA                                                     |   | 8                      |   | <b>DO NOT READ</b> Don't know / No answer |   |   |   |   |    |    |    |    |    |    |    |    |
| REFUSED                                                   |   | 9                      |   | <b>DO NOT READ</b> Refused                |   |   |   |   |    |    |    |    |    |    |    |    |

|                                                                                                                                                   |    |                     |    |                                           |    |    |    |    |    |    |    |    |    |    |
|---------------------------------------------------------------------------------------------------------------------------------------------------|----|---------------------|----|-------------------------------------------|----|----|----|----|----|----|----|----|----|----|
| 18                                                                                                                                                | 19 | 20                  | 21 | 22                                        | 23 | 24 | 25 | 26 | 27 | 28 | 29 | 30 | 31 | 32 |
| <b>MBI_33</b>                                                                                                                                     |    | <b>MBI_FRUS_MSI</b> |    |                                           |    |    |    |    |    |    |    |    |    |    |
| <b>[ALWAYS ASK]</b>                                                                                                                               |    |                     |    |                                           |    |    |    |    |    |    |    |    |    |    |
| Has the person become more easily frustrated or impatient? Does she/he have troubles coping with delays, or waiting for events or for their turn? |    |                     |    |                                           |    |    |    |    |    |    |    |    |    |    |
| YES                                                                                                                                               |    | 1                   |    | Yes                                       |    |    |    |    |    |    |    |    |    |    |
| NO                                                                                                                                                |    | 2                   |    | No                                        |    |    |    |    |    |    |    |    |    |    |
| DK_NA                                                                                                                                             |    | 8                   |    | <b>DO NOT READ</b> Don't know / No answer |    |    |    |    |    |    |    |    |    |    |
| REFUSED                                                                                                                                           |    | 9                   |    | <b>DO NOT READ</b> Refused                |    |    |    |    |    |    |    |    |    |    |

|                                                           |    |                        |    |                                           |    |    |    |    |    |    |    |    |    |    |    |    |    |    |    |    |    |    |    |    |    |    |    |
|-----------------------------------------------------------|----|------------------------|----|-------------------------------------------|----|----|----|----|----|----|----|----|----|----|----|----|----|----|----|----|----|----|----|----|----|----|----|
| 33                                                        | 34 | 35                     | 36 | 37                                        | 38 | 39 | 40 | 41 | 42 | 43 | 44 | 45 | 46 | 47 | 48 | 49 | 50 | 51 | 52 | 53 | 54 | 55 | 56 | 57 | 58 | 59 | 60 |
| <b>MBI_34</b>                                             |    | <b>MBI_FRUSSEV_MSI</b> |    |                                           |    |    |    |    |    |    |    |    |    |    |    |    |    |    |    |    |    |    |    |    |    |    |    |
| <b>[ASK IF MBI_FRUS_MSI = Yes]</b>                        |    |                        |    |                                           |    |    |    |    |    |    |    |    |    |    |    |    |    |    |    |    |    |    |    |    |    |    |    |
| How would you describe the severity of this behaviour...? |    |                        |    |                                           |    |    |    |    |    |    |    |    |    |    |    |    |    |    |    |    |    |    |    |    |    |    |    |
| <b>CODE ONLY ONE RESPONSE</b>                             |    |                        |    |                                           |    |    |    |    |    |    |    |    |    |    |    |    |    |    |    |    |    |    |    |    |    |    |    |
| MILD                                                      |    | 1                      |    | Mild                                      |    |    |    |    |    |    |    |    |    |    |    |    |    |    |    |    |    |    |    |    |    |    |    |
| MOD                                                       |    | 2                      |    | Moderate                                  |    |    |    |    |    |    |    |    |    |    |    |    |    |    |    |    |    |    |    |    |    |    |    |
| SEVERE                                                    |    | 3                      |    | Severe                                    |    |    |    |    |    |    |    |    |    |    |    |    |    |    |    |    |    |    |    |    |    |    |    |
| DK_NA                                                     |    | 8                      |    | <b>DO NOT READ</b> Don't know / No answer |    |    |    |    |    |    |    |    |    |    |    |    |    |    |    |    |    |    |    |    |    |    |    |
| REFUSED                                                   |    | 9                      |    | <b>DO NOT READ</b> Refused                |    |    |    |    |    |    |    |    |    |    |    |    |    |    |    |    |    |    |    |    |    |    |    |



**CLSA Memory Study Informant Questionnaire**  
v1.1, 2022 October 12

|                                                                                                                                            |   |                      |   |                                            |   |   |   |   |    |    |    |    |    |    |
|--------------------------------------------------------------------------------------------------------------------------------------------|---|----------------------|---|--------------------------------------------|---|---|---|---|----|----|----|----|----|----|
| 1                                                                                                                                          | 2 | 3                    | 4 | 5                                          | 6 | 7 | 8 | 9 | 10 | 11 | 12 | 13 | 14 | 15 |
| <b>MBI_35</b>                                                                                                                              |   | <b>MBI_DRIVE_MSI</b> |   |                                            |   |   |   |   |    |    |    |    |    |    |
| <b>[ALWAYS ASK]</b>                                                                                                                        |   |                      |   |                                            |   |   |   |   |    |    |    |    |    |    |
| Does the person display a new recklessness or lack of judgement when driving (e.g. speeding, erratic swerving, abrupt lane changes, etc.)? |   |                      |   |                                            |   |   |   |   |    |    |    |    |    |    |
| YES                                                                                                                                        |   | 1                    |   | Yes                                        |   |   |   |   |    |    |    |    |    |    |
| NO                                                                                                                                         |   | 2                    |   | No                                         |   |   |   |   |    |    |    |    |    |    |
| DK_NA                                                                                                                                      |   | 8                    |   | <b>DO NOT READ]</b> Don't know / No answer |   |   |   |   |    |    |    |    |    |    |
| REFUSED                                                                                                                                    |   | 9                    |   | <b>DO NOT READ]</b> Refused                |   |   |   |   |    |    |    |    |    |    |

|                                                           |    |                         |    |                                            |    |    |    |    |    |    |    |    |    |    |
|-----------------------------------------------------------|----|-------------------------|----|--------------------------------------------|----|----|----|----|----|----|----|----|----|----|
| 16                                                        | 17 | 18                      | 19 | 20                                         | 21 | 22 | 23 | 24 | 25 | 26 | 27 | 28 | 29 | 30 |
| <b>MBI_36</b>                                             |    | <b>MBI_DRIVESEV_MSI</b> |    |                                            |    |    |    |    |    |    |    |    |    |    |
| <b>[ASK IF MBI_DRIVE_MSI = Yes]</b>                       |    |                         |    |                                            |    |    |    |    |    |    |    |    |    |    |
| How would you describe the severity of this behaviour...? |    |                         |    |                                            |    |    |    |    |    |    |    |    |    |    |
| <b>CODE ONLY ONE RESPONSE</b>                             |    |                         |    |                                            |    |    |    |    |    |    |    |    |    |    |
| MILD                                                      |    | 1                       |    | Mild                                       |    |    |    |    |    |    |    |    |    |    |
| MOD                                                       |    | 2                       |    | Moderate                                   |    |    |    |    |    |    |    |    |    |    |
| SEVERE                                                    |    | 3                       |    | Severe                                     |    |    |    |    |    |    |    |    |    |    |
| DK_NA                                                     |    | 8                       |    | <b>DO NOT READ]</b> Don't know / No answer |    |    |    |    |    |    |    |    |    |    |
| REFUSED                                                   |    | 9                       |    | <b>DO NOT READ]</b> Refused                |    |    |    |    |    |    |    |    |    |    |

|                                                                                                                                                      |    |                     |    |                                            |    |    |    |    |    |    |    |    |    |    |
|------------------------------------------------------------------------------------------------------------------------------------------------------|----|---------------------|----|--------------------------------------------|----|----|----|----|----|----|----|----|----|----|
| 31                                                                                                                                                   | 32 | 33                  | 34 | 35                                         | 36 | 37 | 38 | 39 | 40 | 41 | 42 | 43 | 44 | 45 |
| <b>MBI_37</b>                                                                                                                                        |    | <b>MBI_STUB_MSI</b> |    |                                            |    |    |    |    |    |    |    |    |    |    |
| <b>[ALWAYS ASK]</b>                                                                                                                                  |    |                     |    |                                            |    |    |    |    |    |    |    |    |    |    |
| Has the person become more stubborn or rigid, i.e., uncharacteristically insistent on having their way, or unwilling/unable to see/hear other views? |    |                     |    |                                            |    |    |    |    |    |    |    |    |    |    |
| YES                                                                                                                                                  |    | 1                   |    | Yes                                        |    |    |    |    |    |    |    |    |    |    |
| NO                                                                                                                                                   |    | 2                   |    | No                                         |    |    |    |    |    |    |    |    |    |    |
| DK_NA                                                                                                                                                |    | 8                   |    | <b>DO NOT READ]</b> Don't know / No answer |    |    |    |    |    |    |    |    |    |    |
| REFUSED                                                                                                                                              |    | 9                   |    | <b>DO NOT READ]</b> Refused                |    |    |    |    |    |    |    |    |    |    |



|                                                           |   |                        |   |                                           |   |   |   |   |    |    |    |    |    |    |    |    |    |    |
|-----------------------------------------------------------|---|------------------------|---|-------------------------------------------|---|---|---|---|----|----|----|----|----|----|----|----|----|----|
| 1                                                         | 2 | 3                      | 4 | 5                                         | 6 | 7 | 8 | 9 | 10 | 11 | 12 | 13 | 14 | 15 | 16 | 17 | 18 | 19 |
| <b>MBI_38</b>                                             |   | <b>MBI_STUBSEV_MSI</b> |   |                                           |   |   |   |   |    |    |    |    |    |    |    |    |    |    |
| <b>[ASK IF MBI_STUB_MSI = Yes]</b>                        |   |                        |   |                                           |   |   |   |   |    |    |    |    |    |    |    |    |    |    |
| How would you describe the severity of this behaviour...? |   |                        |   |                                           |   |   |   |   |    |    |    |    |    |    |    |    |    |    |
| <b>CODE ONLY ONE RESPONSE</b>                             |   |                        |   |                                           |   |   |   |   |    |    |    |    |    |    |    |    |    |    |
| MILD                                                      |   | 1                      |   | Mild                                      |   |   |   |   |    |    |    |    |    |    |    |    |    |    |
| MOD                                                       |   | 2                      |   | Moderate                                  |   |   |   |   |    |    |    |    |    |    |    |    |    |    |
| SEVERE                                                    |   | 3                      |   | Severe                                    |   |   |   |   |    |    |    |    |    |    |    |    |    |    |
| DK_NA                                                     |   | 8                      |   | <b>DO NOT READ</b> Don't know / No answer |   |   |   |   |    |    |    |    |    |    |    |    |    |    |
| REFUSED                                                   |   | 9                      |   | <b>DO NOT READ</b> Refused                |   |   |   |   |    |    |    |    |    |    |    |    |    |    |

|                                                                                                                                                                       |    |                     |    |                                           |    |    |    |    |    |    |    |    |    |    |    |    |    |    |    |
|-----------------------------------------------------------------------------------------------------------------------------------------------------------------------|----|---------------------|----|-------------------------------------------|----|----|----|----|----|----|----|----|----|----|----|----|----|----|----|
| 20                                                                                                                                                                    | 21 | 22                  | 23 | 24                                        | 25 | 26 | 27 | 28 | 29 | 30 | 31 | 32 | 33 | 34 | 35 | 36 | 37 | 38 | 39 |
| <b>MBI_39</b>                                                                                                                                                         |    | <b>MBI_FOOD_MSI</b> |    |                                           |    |    |    |    |    |    |    |    |    |    |    |    |    |    |    |
| <b>[ALWAYS ASK]</b>                                                                                                                                                   |    |                     |    |                                           |    |    |    |    |    |    |    |    |    |    |    |    |    |    |    |
| Is there a change in eating behaviours (e.g., overeating, cramming the mouth, insistent on eating only specific foods, or eating the food in exactly the same order)? |    |                     |    |                                           |    |    |    |    |    |    |    |    |    |    |    |    |    |    |    |
| YES                                                                                                                                                                   |    | 1                   |    | Yes                                       |    |    |    |    |    |    |    |    |    |    |    |    |    |    |    |
| NO                                                                                                                                                                    |    | 2                   |    | No                                        |    |    |    |    |    |    |    |    |    |    |    |    |    |    |    |
| DK_NA                                                                                                                                                                 |    | 8                   |    | <b>DO NOT READ</b> Don't know / No answer |    |    |    |    |    |    |    |    |    |    |    |    |    |    |    |
| REFUSED                                                                                                                                                               |    | 9                   |    | <b>DO NOT READ</b> Refused                |    |    |    |    |    |    |    |    |    |    |    |    |    |    |    |

|                                                           |    |                        |    |                                           |    |    |    |    |    |    |    |    |    |    |    |    |    |    |    |
|-----------------------------------------------------------|----|------------------------|----|-------------------------------------------|----|----|----|----|----|----|----|----|----|----|----|----|----|----|----|
| 40                                                        | 41 | 42                     | 43 | 44                                        | 45 | 46 | 47 | 48 | 49 | 50 | 51 | 52 | 53 | 54 | 55 | 56 | 57 | 58 | 59 |
| <b>MBI_40</b>                                             |    | <b>MBI_FOODSEV_MSI</b> |    |                                           |    |    |    |    |    |    |    |    |    |    |    |    |    |    |    |
| <b>[ASK IF MBI_FOOD_MSI = Yes]</b>                        |    |                        |    |                                           |    |    |    |    |    |    |    |    |    |    |    |    |    |    |    |
| How would you describe the severity of this behaviour...? |    |                        |    |                                           |    |    |    |    |    |    |    |    |    |    |    |    |    |    |    |
| <b>CODE ONLY ONE RESPONSE</b>                             |    |                        |    |                                           |    |    |    |    |    |    |    |    |    |    |    |    |    |    |    |
| MILD                                                      |    | 1                      |    | Mild                                      |    |    |    |    |    |    |    |    |    |    |    |    |    |    |    |
| MOD                                                       |    | 2                      |    | Moderate                                  |    |    |    |    |    |    |    |    |    |    |    |    |    |    |    |
| SEVERE                                                    |    | 3                      |    | Severe                                    |    |    |    |    |    |    |    |    |    |    |    |    |    |    |    |
| DK_NA                                                     |    | 8                      |    | <b>DO NOT READ</b> Don't know / No answer |    |    |    |    |    |    |    |    |    |    |    |    |    |    |    |
| REFUSED                                                   |    | 9                      |    | <b>DO NOT READ</b> Refused                |    |    |    |    |    |    |    |    |    |    |    |    |    |    |    |



**CLSA Memory Study Informant Questionnaire**  
v1.1, 2022 October 12

|                                                                                  |                    |                                            |
|----------------------------------------------------------------------------------|--------------------|--------------------------------------------|
| <b>MBI_41</b>                                                                    | <b>MBI_APP_MSI</b> |                                            |
| <b>[ALWAYS ASK]</b>                                                              |                    |                                            |
| Does the person no longer find food tasteful or enjoyable? Are they eating less? |                    |                                            |
| YES                                                                              | 1                  | Yes                                        |
| NO                                                                               | 2                  | No                                         |
| DK_NA                                                                            | 8                  | <b>DO NOT READ]</b> Don't know / No answer |
| REFUSED                                                                          | 9                  | <b>DO NOT READ]</b> Refused                |

|                                                           |                       |                                            |
|-----------------------------------------------------------|-----------------------|--------------------------------------------|
| <b>MBI_42</b>                                             | <b>MBI_APPSEV_MSI</b> |                                            |
| <b>[ASK IF MBI_APP_MSI = Yes]</b>                         |                       |                                            |
| How would you describe the severity of this behaviour...? |                       |                                            |
| <b>CODE ONLY ONE RESPONSE</b>                             |                       |                                            |
| MILD                                                      | 1                     | Mild                                       |
| MOD                                                       | 2                     | Moderate                                   |
| SEVERE                                                    | 3                     | Severe                                     |
| DK_NA                                                     | 8                     | <b>DO NOT READ]</b> Don't know / No answer |
| REFUSED                                                   | 9                     | <b>DO NOT READ]</b> Refused                |

|                                                                 |                      |                                            |
|-----------------------------------------------------------------|----------------------|--------------------------------------------|
| <b>MBI_43</b>                                                   | <b>MBI_HOARD_MSI</b> |                                            |
| <b>[ALWAYS ASK]</b>                                             |                      |                                            |
| Does the person hoard objects when she/he did not do so before? |                      |                                            |
| YES                                                             | 1                    | Yes                                        |
| NO                                                              | 2                    | No                                         |
| DK_NA                                                           | 8                    | <b>DO NOT READ]</b> Don't know / No answer |
| REFUSED                                                         | 9                    | <b>DO NOT READ]</b> Refused                |



|                                                           |   |                         |   |                                           |   |   |   |   |    |    |    |    |    |    |    |    |    |    |
|-----------------------------------------------------------|---|-------------------------|---|-------------------------------------------|---|---|---|---|----|----|----|----|----|----|----|----|----|----|
| 1                                                         | 2 | 3                       | 4 | 5                                         | 6 | 7 | 8 | 9 | 10 | 11 | 12 | 13 | 14 | 15 | 16 | 17 | 18 | 19 |
| <b>MBI_44</b>                                             |   | <b>MBI_HOARDSEV_MSI</b> |   |                                           |   |   |   |   |    |    |    |    |    |    |    |    |    |    |
| <b>[ASK IF MBI_HOARD_MSI = Yes]</b>                       |   |                         |   |                                           |   |   |   |   |    |    |    |    |    |    |    |    |    |    |
| How would you describe the severity of this behaviour...? |   |                         |   |                                           |   |   |   |   |    |    |    |    |    |    |    |    |    |    |
| <b>CODE ONLY ONE RESPONSE</b>                             |   |                         |   |                                           |   |   |   |   |    |    |    |    |    |    |    |    |    |    |
| MILD                                                      |   | 1                       |   | Mild                                      |   |   |   |   |    |    |    |    |    |    |    |    |    |    |
| MOD                                                       |   | 2                       |   | Moderate                                  |   |   |   |   |    |    |    |    |    |    |    |    |    |    |
| SEVERE                                                    |   | 3                       |   | Severe                                    |   |   |   |   |    |    |    |    |    |    |    |    |    |    |
| DK_NA                                                     |   | 8                       |   | <b>DO NOT READ</b> Don't know / No answer |   |   |   |   |    |    |    |    |    |    |    |    |    |    |
| REFUSED                                                   |   | 9                       |   | <b>DO NOT READ</b> Refused                |   |   |   |   |    |    |    |    |    |    |    |    |    |    |

|                                                                       |    |                    |    |                                           |    |    |    |    |    |    |    |    |    |    |    |    |    |    |    |
|-----------------------------------------------------------------------|----|--------------------|----|-------------------------------------------|----|----|----|----|----|----|----|----|----|----|----|----|----|----|----|
| 20                                                                    | 21 | 22                 | 23 | 24                                        | 25 | 26 | 27 | 28 | 29 | 30 | 31 | 32 | 33 | 34 | 35 | 36 | 37 | 38 | 39 |
| <b>MBI_45</b>                                                         |    | <b>MBI_REP_MSI</b> |    |                                           |    |    |    |    |    |    |    |    |    |    |    |    |    |    |    |
| <b>[ALWAYS ASK]</b>                                                   |    |                    |    |                                           |    |    |    |    |    |    |    |    |    |    |    |    |    |    |    |
| Has the person developed simple repetitive behaviours or compulsions? |    |                    |    |                                           |    |    |    |    |    |    |    |    |    |    |    |    |    |    |    |
| YES                                                                   |    | 1                  |    | Yes                                       |    |    |    |    |    |    |    |    |    |    |    |    |    |    |    |
| NO                                                                    |    | 2                  |    | No                                        |    |    |    |    |    |    |    |    |    |    |    |    |    |    |    |
| DK_NA                                                                 |    | 8                  |    | <b>DO NOT READ</b> Don't know / No answer |    |    |    |    |    |    |    |    |    |    |    |    |    |    |    |
| REFUSED                                                               |    | 9                  |    | <b>DO NOT READ</b> Refused                |    |    |    |    |    |    |    |    |    |    |    |    |    |    |    |

|                                                           |    |                       |    |                                           |    |    |    |    |    |    |    |    |    |    |    |    |    |    |    |
|-----------------------------------------------------------|----|-----------------------|----|-------------------------------------------|----|----|----|----|----|----|----|----|----|----|----|----|----|----|----|
| 40                                                        | 41 | 42                    | 43 | 44                                        | 45 | 46 | 47 | 48 | 49 | 50 | 51 | 52 | 53 | 54 | 55 | 56 | 57 | 58 | 59 |
| <b>MBI_46</b>                                             |    | <b>MBI_REPSEV_MSI</b> |    |                                           |    |    |    |    |    |    |    |    |    |    |    |    |    |    |    |
| <b>[ASK IF MBI_REP_MSI = Yes]</b>                         |    |                       |    |                                           |    |    |    |    |    |    |    |    |    |    |    |    |    |    |    |
| How would you describe the severity of this behaviour...? |    |                       |    |                                           |    |    |    |    |    |    |    |    |    |    |    |    |    |    |    |
| <b>CODE ONLY ONE RESPONSE</b>                             |    |                       |    |                                           |    |    |    |    |    |    |    |    |    |    |    |    |    |    |    |
| MILD                                                      |    | 1                     |    | Mild                                      |    |    |    |    |    |    |    |    |    |    |    |    |    |    |    |
| MOD                                                       |    | 2                     |    | Moderate                                  |    |    |    |    |    |    |    |    |    |    |    |    |    |    |    |
| SEVERE                                                    |    | 3                     |    | Severe                                    |    |    |    |    |    |    |    |    |    |    |    |    |    |    |    |
| DK_NA                                                     |    | 8                     |    | <b>DO NOT READ</b> Don't know / No answer |    |    |    |    |    |    |    |    |    |    |    |    |    |    |    |
| REFUSED                                                   |    | 9                     |    | <b>DO NOT READ</b> Refused                |    |    |    |    |    |    |    |    |    |    |    |    |    |    |    |



**CLSA Memory Study Informant Questionnaire**  
v1.1, 2022 October 12

|                                                                                                                         |                     |                                            |
|-------------------------------------------------------------------------------------------------------------------------|---------------------|--------------------------------------------|
| <b>MBI_47</b>                                                                                                           | <b>MBI_REGU_MSI</b> |                                            |
| <b>[ALWAYS ASK]</b>                                                                                                     |                     |                                            |
| Has the person recently developed trouble regulating smoking, alcohol, drug intake or gambling, or started shoplifting? |                     |                                            |
| YES                                                                                                                     | 1                   | Yes                                        |
| NO                                                                                                                      | 2                   | No                                         |
| DK_NA                                                                                                                   | 8                   | <b>DO NOT READ]</b> Don't know / No answer |
| REFUSED                                                                                                                 | 9                   | <b>DO NOT READ]</b> Refused                |

|                                                           |                        |                                            |
|-----------------------------------------------------------|------------------------|--------------------------------------------|
| <b>MBI_48</b>                                             | <b>MBI_REGUSEV_MSI</b> |                                            |
| <b>[ASK IF MBI_REGU_MSI = Yes]</b>                        |                        |                                            |
| How would you describe the severity of this behaviour...? |                        |                                            |
| <b>CODE ONLY ONE RESPONSE</b>                             |                        |                                            |
| MILD                                                      | 1                      | Mild                                       |
| MOD                                                       | 2                      | Moderate                                   |
| SEVERE                                                    | 3                      | Severe                                     |
| DK_NA                                                     | 8                      | <b>DO NOT READ]</b> Don't know / No answer |
| REFUSED                                                   | 9                      | <b>DO NOT READ]</b> Refused                |

The next domain describes following society norms and having social graces, tact, and empathy.

**Interviewer note, remind the respondent if required:** For each questions you respond “yes” to indicating a change in behaviour, I will ask you to respond about the severity of the behaviour based on the following options:

- 1) Mild where the change in behaviour is noticeable, but not a significant change;
- 2) Moderate where the change in behaviour is significant, but not a dramatic change;

Severe where the change in behaviour is marked or prominent, a dramatic change. If there is more than one behaviour listed in a question, please rate the most severe behavioural change.

|                                                                                                                                           |                      |                                            |
|-------------------------------------------------------------------------------------------------------------------------------------------|----------------------|--------------------------------------------|
| <b>MBI_49</b>                                                                                                                             | <b>MBI_INSEN_MSI</b> |                                            |
| <b>[ALWAYS ASK]</b>                                                                                                                       |                      |                                            |
| Has the person become less concerned about how her/his words or actions affect others? Has she/he become insensitive to others' feelings? |                      |                                            |
| YES                                                                                                                                       | 1                    | Yes                                        |
| NO                                                                                                                                        | 2                    | No                                         |
| DK_NA                                                                                                                                     | 8                    | <b>DO NOT READ]</b> Don't know / No answer |
| REFUSED                                                                                                                                   | 9                    | <b>DO NOT READ]</b> Refused                |





|                                                           |                         |                                            |
|-----------------------------------------------------------|-------------------------|--------------------------------------------|
| <b>MBI_50</b>                                             | <b>MBI_INSENSEV_MSI</b> |                                            |
| <b>[ASK IF MBI_INSEN_MSI = Yes]</b>                       |                         |                                            |
| How would you describe the severity of this behaviour...? |                         |                                            |
| <b>CODE ONLY ONE RESPONSE</b>                             |                         |                                            |
| MILD                                                      | 1                       | Mild                                       |
| MOD                                                       | 2                       | Moderate                                   |
| SEVERE                                                    | 3                       | Severe                                     |
| DK_NA                                                     | 8                       | <b>DO NOT READ]</b> Don't know / No answer |
| REFUSED                                                   | 9                       | <b>DO NOT READ]</b> Refused                |

|                                                                                                               |                     |                                            |
|---------------------------------------------------------------------------------------------------------------|---------------------|--------------------------------------------|
| <b>MBI_51</b>                                                                                                 | <b>MBI_OPEN_MSI</b> |                                            |
| <b>[ALWAYS ASK]</b>                                                                                           |                     |                                            |
| Has the person started talking openly about very personal or private matters not usually discussed in public? |                     |                                            |
| YES                                                                                                           | 1                   | Yes                                        |
| NO                                                                                                            | 2                   | No                                         |
| DK_NA                                                                                                         | 8                   | <b>DO NOT READ]</b> Don't know / No answer |
| REFUSED                                                                                                       | 9                   | <b>DO NOT READ]</b> Refused                |

|                                                           |                        |                                            |
|-----------------------------------------------------------|------------------------|--------------------------------------------|
| <b>MBI_52</b>                                             | <b>MBI_OPENSEV_MSI</b> |                                            |
| <b>[ASK IF MBI_OPEN_MSI = Yes]</b>                        |                        |                                            |
| How would you describe the severity of this behaviour...? |                        |                                            |
| <b>CODE ONLY ONE RESPONSE</b>                             |                        |                                            |
| MILD                                                      | 1                      | Mild                                       |
| MOD                                                       | 2                      | Moderate                                   |
| SEVERE                                                    | 3                      | Severe                                     |
| DK_NA                                                     | 8                      | <b>DO NOT READ]</b> Don't know / No answer |
| REFUSED                                                   | 9                      | <b>DO NOT READ]</b> Refused                |

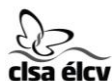

**CLSA Memory Study Informant Questionnaire**  
v1.1, 2022 October 12

|                                                                                                              |                     |                                            |
|--------------------------------------------------------------------------------------------------------------|---------------------|--------------------------------------------|
| <b>MBI_53</b>                                                                                                | <b>MBI_RUDE_MSI</b> |                                            |
| <b>[ALWAYS ASK]</b>                                                                                          |                     |                                            |
| Does the person say rude or crude things or make lewd sexual remarks that she/he would not have said before? |                     |                                            |
| YES                                                                                                          | 1                   | Yes                                        |
| NO                                                                                                           | 2                   | No                                         |
| DK_NA                                                                                                        | 8                   | <b>DO NOT READ]</b> Don't know / No answer |
| REFUSED                                                                                                      | 9                   | <b>DO NOT READ]</b> Refused                |

|                                                           |                        |                                            |
|-----------------------------------------------------------|------------------------|--------------------------------------------|
| <b>MBI_54</b>                                             | <b>MBI_RUDESEV_MSI</b> |                                            |
| <b>[ASK IF MBI_RUDE_MSI = Yes]</b>                        |                        |                                            |
| How would you describe the severity of this behaviour...? |                        |                                            |
| <b>CODE ONLY ONE RESPONSE</b>                             |                        |                                            |
| MILD                                                      | 1                      | Mild                                       |
| MOD                                                       | 2                      | Moderate                                   |
| SEVERE                                                    | 3                      | Severe                                     |
| DK_NA                                                     | 8                      | <b>DO NOT READ]</b> Don't know / No answer |
| REFUSED                                                   | 9                      | <b>DO NOT READ]</b> Refused                |

|                                                                                                                                  |                      |                                            |
|----------------------------------------------------------------------------------------------------------------------------------|----------------------|--------------------------------------------|
| <b>MBI_55</b>                                                                                                                    | <b>MBI_JUDGE_MSI</b> |                                            |
| <b>[ALWAYS ASK]</b>                                                                                                              |                      |                                            |
| Does the person seem to lack the social judgement she/he previously had about what to say or how to behave in public or private? |                      |                                            |
| YES                                                                                                                              | 1                    | Yes                                        |
| NO                                                                                                                               | 2                    | No                                         |
| DK_NA                                                                                                                            | 8                    | <b>DO NOT READ]</b> Don't know / No answer |
| REFUSED                                                                                                                          | 9                    | <b>DO NOT READ]</b> Refused                |



|                                                           |   |                         |   |                                            |   |   |   |   |    |    |    |    |    |    |    |    |    |    |
|-----------------------------------------------------------|---|-------------------------|---|--------------------------------------------|---|---|---|---|----|----|----|----|----|----|----|----|----|----|
| 1                                                         | 2 | 3                       | 4 | 5                                          | 6 | 7 | 8 | 9 | 10 | 11 | 12 | 13 | 14 | 15 | 16 | 17 | 18 | 19 |
| <b>MBI_56</b>                                             |   | <b>MBI_JUDGESEV_MSI</b> |   |                                            |   |   |   |   |    |    |    |    |    |    |    |    |    |    |
| <b>[ASK IF MBI_JUDGE_MSI = Yes]</b>                       |   |                         |   |                                            |   |   |   |   |    |    |    |    |    |    |    |    |    |    |
| How would you describe the severity of this behaviour...? |   |                         |   |                                            |   |   |   |   |    |    |    |    |    |    |    |    |    |    |
| <b>CODE ONLY ONE RESPONSE</b>                             |   |                         |   |                                            |   |   |   |   |    |    |    |    |    |    |    |    |    |    |
| MILD                                                      |   | 1                       |   | Mild                                       |   |   |   |   |    |    |    |    |    |    |    |    |    |    |
| MOD                                                       |   | 2                       |   | Moderate                                   |   |   |   |   |    |    |    |    |    |    |    |    |    |    |
| SEVERE                                                    |   | 3                       |   | Severe                                     |   |   |   |   |    |    |    |    |    |    |    |    |    |    |
| DK_NA                                                     |   | 8                       |   | <b>DO NOT READ]</b> Don't know / No answer |   |   |   |   |    |    |    |    |    |    |    |    |    |    |
| REFUSED                                                   |   | 9                       |   | <b>DO NOT READ]</b> Refused                |   |   |   |   |    |    |    |    |    |    |    |    |    |    |

|                                                                                       |    |                     |    |                                            |    |    |    |    |    |    |    |    |    |    |    |    |    |    |    |
|---------------------------------------------------------------------------------------|----|---------------------|----|--------------------------------------------|----|----|----|----|----|----|----|----|----|----|----|----|----|----|----|
| 20                                                                                    | 21 | 22                  | 23 | 24                                         | 25 | 26 | 27 | 28 | 29 | 30 | 31 | 32 | 33 | 34 | 35 | 36 | 37 | 38 | 39 |
| <b>MBI_57</b>                                                                         |    | <b>MBI_TALK_MSI</b> |    |                                            |    |    |    |    |    |    |    |    |    |    |    |    |    |    |    |
| <b>[ALWAYS ASK]</b>                                                                   |    |                     |    |                                            |    |    |    |    |    |    |    |    |    |    |    |    |    |    |    |
| Does the person now talk to strangers as if familiar, or intrude on their activities? |    |                     |    |                                            |    |    |    |    |    |    |    |    |    |    |    |    |    |    |    |
| YES                                                                                   |    | 1                   |    | Yes                                        |    |    |    |    |    |    |    |    |    |    |    |    |    |    |    |
| NO                                                                                    |    | 2                   |    | No                                         |    |    |    |    |    |    |    |    |    |    |    |    |    |    |    |
| DK_NA                                                                                 |    | 8                   |    | <b>DO NOT READ]</b> Don't know / No answer |    |    |    |    |    |    |    |    |    |    |    |    |    |    |    |
| REFUSED                                                                               |    | 9                   |    | <b>DO NOT READ]</b> Refused                |    |    |    |    |    |    |    |    |    |    |    |    |    |    |    |

|                                                           |    |                        |    |                                            |    |    |    |    |    |    |    |    |    |    |    |    |    |    |    |
|-----------------------------------------------------------|----|------------------------|----|--------------------------------------------|----|----|----|----|----|----|----|----|----|----|----|----|----|----|----|
| 40                                                        | 41 | 42                     | 43 | 44                                         | 45 | 46 | 47 | 48 | 49 | 50 | 51 | 52 | 53 | 54 | 55 | 56 | 57 | 58 | 59 |
| <b>MBI_58</b>                                             |    | <b>MBI_TALKSEV_MSI</b> |    |                                            |    |    |    |    |    |    |    |    |    |    |    |    |    |    |    |
| <b>[ASK IF MBI_TALK_MSI = Yes]</b>                        |    |                        |    |                                            |    |    |    |    |    |    |    |    |    |    |    |    |    |    |    |
| How would you describe the severity of this behaviour...? |    |                        |    |                                            |    |    |    |    |    |    |    |    |    |    |    |    |    |    |    |
| <b>CODE ONLY ONE RESPONSE</b>                             |    |                        |    |                                            |    |    |    |    |    |    |    |    |    |    |    |    |    |    |    |
| MILD                                                      |    | 1                      |    | Mild                                       |    |    |    |    |    |    |    |    |    |    |    |    |    |    |    |
| MOD                                                       |    | 2                      |    | Moderate                                   |    |    |    |    |    |    |    |    |    |    |    |    |    |    |    |
| SEVERE                                                    |    | 3                      |    | Severe                                     |    |    |    |    |    |    |    |    |    |    |    |    |    |    |    |
| DK_NA                                                     |    | 8                      |    | <b>DO NOT READ]</b> Don't know / No answer |    |    |    |    |    |    |    |    |    |    |    |    |    |    |    |
| REFUSED                                                   |    | 9                      |    | <b>DO NOT READ]</b> Refused                |    |    |    |    |    |    |    |    |    |    |    |    |    |    |    |



**CLSA Memory Study Informant Questionnaire**  
v1.1, 2022 October 12

This last domain describes strongly held beliefs and sensory experiences.

**Interviewer note, remind the respondent if required:** For each questions you respond “yes” to indicating a change in behaviour, I will ask you to respond about the severity of the behaviour based on the following options:

- 1) Mild where the change in behaviour is noticeable, but not a significant change;
- 2) Moderate where the change in behaviour is significant, but not a dramatic change;
- 3) Severe where the change in behaviour is marked or prominent, a dramatic change.

If there is more than one behaviour listed in a question, please rate the most severe behavioural change.

|                                                                                                                               |                     |                                            |
|-------------------------------------------------------------------------------------------------------------------------------|---------------------|--------------------------------------------|
| <b>MBI_59</b>                                                                                                                 | <b>MBI_HARM_MSI</b> |                                            |
| <b>[ALWAYS ASK]</b>                                                                                                           |                     |                                            |
| Has the person developed beliefs that they are in danger, or that others are planning to harm them or steal their belongings? |                     |                                            |
| YES                                                                                                                           | 1                   | Yes                                        |
| NO                                                                                                                            | 2                   | No                                         |
| DK_NA                                                                                                                         | 8                   | <b>DO NOT READ]</b> Don't know / No answer |
| REFUSED                                                                                                                       | 9                   | <b>DO NOT READ]</b> Refused                |

|                                                           |                        |                                            |
|-----------------------------------------------------------|------------------------|--------------------------------------------|
| <b>MBI_60</b>                                             | <b>MBI_HARMSEV_MSI</b> |                                            |
| <b>[ASK IF MBI_HARM_MSI = Yes]</b>                        |                        |                                            |
| How would you describe the severity of this behaviour...? |                        |                                            |
| <b>CODE ONLY ONE RESPONSE</b>                             |                        |                                            |
| MILD                                                      | 1                      | Mild                                       |
| MOD                                                       | 2                      | Moderate                                   |
| SEVERE                                                    | 3                      | Severe                                     |
| DK_NA                                                     | 8                      | <b>DO NOT READ]</b> Don't know / No answer |
| REFUSED                                                   | 9                      | <b>DO NOT READ]</b> Refused                |

|                                                                                          |                     |                                            |
|------------------------------------------------------------------------------------------|---------------------|--------------------------------------------|
| <b>MBI_61</b>                                                                            | <b>MBI_SUSP_MSI</b> |                                            |
| <b>[ALWAYS ASK]</b>                                                                      |                     |                                            |
| Has the person developed suspiciousness about the intentions or motives of other people? |                     |                                            |
| YES                                                                                      | 1                   | Yes                                        |
| NO                                                                                       | 2                   | No                                         |
| DK_NA                                                                                    | 8                   | <b>DO NOT READ]</b> Don't know / No answer |
| REFUSED                                                                                  | 9                   | <b>DO NOT READ]</b> Refused                |



|                                                           |   |                        |   |                                            |   |   |   |   |    |    |    |    |    |    |    |    |    |    |    |    |
|-----------------------------------------------------------|---|------------------------|---|--------------------------------------------|---|---|---|---|----|----|----|----|----|----|----|----|----|----|----|----|
| 1                                                         | 2 | 3                      | 4 | 5                                          | 6 | 7 | 8 | 9 | 10 | 11 | 12 | 13 | 14 | 15 | 16 | 17 | 18 | 19 | 20 | 21 |
| <b>MBI_62</b>                                             |   | <b>MBI_SUSPSEV_MSI</b> |   |                                            |   |   |   |   |    |    |    |    |    |    |    |    |    |    |    |    |
| <b>[ASK IF MBI_SUSP_MSI = Yes]</b>                        |   |                        |   |                                            |   |   |   |   |    |    |    |    |    |    |    |    |    |    |    |    |
| How would you describe the severity of this behaviour...? |   |                        |   |                                            |   |   |   |   |    |    |    |    |    |    |    |    |    |    |    |    |
| <b>CODE ONLY ONE RESPONSE</b>                             |   |                        |   |                                            |   |   |   |   |    |    |    |    |    |    |    |    |    |    |    |    |
| MILD                                                      |   | 1                      |   | Mild                                       |   |   |   |   |    |    |    |    |    |    |    |    |    |    |    |    |
| MOD                                                       |   | 2                      |   | Moderate                                   |   |   |   |   |    |    |    |    |    |    |    |    |    |    |    |    |
| SEVERE                                                    |   | 3                      |   | Severe                                     |   |   |   |   |    |    |    |    |    |    |    |    |    |    |    |    |
| DK_NA                                                     |   | 8                      |   | <b>DO NOT READ]</b> Don't know / No answer |   |   |   |   |    |    |    |    |    |    |    |    |    |    |    |    |
| REFUSED                                                   |   | 9                      |   | <b>DO NOT READ]</b> Refused                |   |   |   |   |    |    |    |    |    |    |    |    |    |    |    |    |

|                                                                             |    |                     |    |                                            |    |    |    |    |    |    |    |    |    |    |    |    |    |    |    |    |
|-----------------------------------------------------------------------------|----|---------------------|----|--------------------------------------------|----|----|----|----|----|----|----|----|----|----|----|----|----|----|----|----|
| 22                                                                          | 23 | 24                  | 25 | 26                                         | 27 | 28 | 29 | 30 | 31 | 32 | 33 | 34 | 35 | 36 | 37 | 38 | 39 | 40 | 41 | 42 |
| <b>MBI_63</b>                                                               |    | <b>MBI_UNRL_MSI</b> |    |                                            |    |    |    |    |    |    |    |    |    |    |    |    |    |    |    |    |
| <b>[ALWAYS ASK]</b>                                                         |    |                     |    |                                            |    |    |    |    |    |    |    |    |    |    |    |    |    |    |    |    |
| Doe she/he have unrealistic beliefs about her/his power, wealth, or skills? |    |                     |    |                                            |    |    |    |    |    |    |    |    |    |    |    |    |    |    |    |    |
| YES                                                                         |    | 1                   |    | Yes                                        |    |    |    |    |    |    |    |    |    |    |    |    |    |    |    |    |
| NO                                                                          |    | 2                   |    | No                                         |    |    |    |    |    |    |    |    |    |    |    |    |    |    |    |    |
| DK_NA                                                                       |    | 8                   |    | <b>DO NOT READ]</b> Don't know / No answer |    |    |    |    |    |    |    |    |    |    |    |    |    |    |    |    |
| REFUSED                                                                     |    | 9                   |    | <b>DO NOT READ]</b> Refused                |    |    |    |    |    |    |    |    |    |    |    |    |    |    |    |    |

|                                                           |    |                        |    |                                            |    |    |    |    |    |    |    |    |    |    |    |    |    |    |    |    |
|-----------------------------------------------------------|----|------------------------|----|--------------------------------------------|----|----|----|----|----|----|----|----|----|----|----|----|----|----|----|----|
| 35                                                        | 36 | 37                     | 38 | 39                                         | 40 | 41 | 42 | 43 | 44 | 45 | 46 | 47 | 48 | 49 | 50 | 51 | 52 | 53 | 54 | 55 |
| <b>MBI_64</b>                                             |    | <b>MBI_UNRLSEV_MSI</b> |    |                                            |    |    |    |    |    |    |    |    |    |    |    |    |    |    |    |    |
| <b>[ASK IF MBI_UNRL_MSI = Yes]</b>                        |    |                        |    |                                            |    |    |    |    |    |    |    |    |    |    |    |    |    |    |    |    |
| How would you describe the severity of this behaviour...? |    |                        |    |                                            |    |    |    |    |    |    |    |    |    |    |    |    |    |    |    |    |
| <b>CODE ONLY ONE RESPONSE</b>                             |    |                        |    |                                            |    |    |    |    |    |    |    |    |    |    |    |    |    |    |    |    |
| MILD                                                      |    | 1                      |    | Mild                                       |    |    |    |    |    |    |    |    |    |    |    |    |    |    |    |    |
| MOD                                                       |    | 2                      |    | Moderate                                   |    |    |    |    |    |    |    |    |    |    |    |    |    |    |    |    |
| SEVERE                                                    |    | 3                      |    | Severe                                     |    |    |    |    |    |    |    |    |    |    |    |    |    |    |    |    |
| DK_NA                                                     |    | 8                      |    | <b>DO NOT READ]</b> Don't know / No answer |    |    |    |    |    |    |    |    |    |    |    |    |    |    |    |    |
| REFUSED                                                   |    | 9                      |    | <b>DO NOT READ]</b> Refused                |    |    |    |    |    |    |    |    |    |    |    |    |    |    |    |    |



**CLSA Memory Study Informant Questionnaire**  
v1.1, 2022 October 12

|                                                                                              |                      |                                            |
|----------------------------------------------------------------------------------------------|----------------------|--------------------------------------------|
| <b>MBI_65</b>                                                                                | <b>MBI_VOICE_MSI</b> |                                            |
| <b>[ALWAYS ASK]</b>                                                                          |                      |                                            |
| Does the person describe hearing voices or does she/he talk to imaginary people or “spirits” |                      |                                            |
| YES                                                                                          | 1                    | Yes                                        |
| NO                                                                                           | 2                    | No                                         |
| DK_NA                                                                                        | 8                    | <b>DO NOT READ]</b> Don't know / No answer |
| REFUSED                                                                                      | 9                    | <b>DO NOT READ]</b> Refused                |

|                                                           |                        |                                            |
|-----------------------------------------------------------|------------------------|--------------------------------------------|
| <b>MBI_66</b>                                             | <b>MBI_VOICSEV_MSI</b> |                                            |
| <b>[ASK IF MBI_VOICE_MSI = Yes]</b>                       |                        |                                            |
| How would you describe the severity of this behaviour...? |                        |                                            |
| <b>CODE ONLY ONE RESPONSE</b>                             |                        |                                            |
| MILD                                                      | 1                      | Mild                                       |
| MOD                                                       | 2                      | Moderate                                   |
| SEVERE                                                    | 3                      | Severe                                     |
| DK_NA                                                     | 8                      | <b>DO NOT READ]</b> Don't know / No answer |
| REFUSED                                                   | 9                      | <b>DO NOT READ]</b> Refused                |

|                                                                                                                                                                 |                     |                                            |
|-----------------------------------------------------------------------------------------------------------------------------------------------------------------|---------------------|--------------------------------------------|
| <b>MBI_67</b>                                                                                                                                                   | <b>MBI_IMAG_MSI</b> |                                            |
| <b>[ALWAYS ASK]</b>                                                                                                                                             |                     |                                            |
| Does the person report or complain about, or act as if seeing things (e.g. people, animals, or insects) that are not there, i.e., that are imaginary to others? |                     |                                            |
| YES                                                                                                                                                             | 1                   | Yes                                        |
| NO                                                                                                                                                              | 2                   | No                                         |
| DK_NA                                                                                                                                                           | 8                   | <b>DO NOT READ]</b> Don't know / No answer |
| REFUSED                                                                                                                                                         | 9                   | <b>DO NOT READ]</b> Refused                |



|                                                           |   |                        |   |                                            |   |   |   |   |    |    |    |    |    |    |    |    |
|-----------------------------------------------------------|---|------------------------|---|--------------------------------------------|---|---|---|---|----|----|----|----|----|----|----|----|
| 1                                                         | 2 | 3                      | 4 | 5                                          | 6 | 7 | 8 | 9 | 10 | 11 | 12 | 13 | 14 | 15 | 16 | 17 |
| <b>MBI_68</b>                                             |   | <b>MBI_IMAGSEV_MSI</b> |   |                                            |   |   |   |   |    |    |    |    |    |    |    |    |
| <b>[ASK IF MBI_IMAG_MSI = Yes]</b>                        |   |                        |   |                                            |   |   |   |   |    |    |    |    |    |    |    |    |
| How would you describe the severity of this behaviour...? |   |                        |   |                                            |   |   |   |   |    |    |    |    |    |    |    |    |
| <b>CODE ONLY ONE RESPONSE</b>                             |   |                        |   |                                            |   |   |   |   |    |    |    |    |    |    |    |    |
| MILD                                                      |   | 1                      |   | Mild                                       |   |   |   |   |    |    |    |    |    |    |    |    |
| MOD                                                       |   | 2                      |   | Moderate                                   |   |   |   |   |    |    |    |    |    |    |    |    |
| SEVERE                                                    |   | 3                      |   | Severe                                     |   |   |   |   |    |    |    |    |    |    |    |    |
| DK_NA                                                     |   | 8                      |   | <b>DO NOT READ]</b> Don't know / No answer |   |   |   |   |    |    |    |    |    |    |    |    |
| REFUSED                                                   |   | 9                      |   | <b>DO NOT READ]</b> Refused                |   |   |   |   |    |    |    |    |    |    |    |    |

18  
19 **MBI\_END**  
20  
21  
22  
23  
24  
25  
26  
27  
28  
29  
30  
31  
32  
33  
34  
35  
36  
37  
38  
39  
40  
41  
42  
43  
44  
45  
46  
47  
48  
49  
50  
51  
52  
53  
54  
55  
56  
57  
58  
59  
60

**Supplementary Appendix 7 – Letter for participants with potential concerns about their cognition**

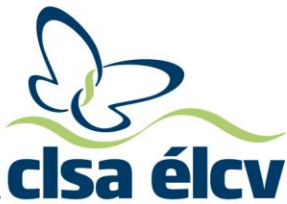

Canadian Longitudinal Study on Aging  
Étude longitudinale canadienne sur le vieillissement

Date

Dear [Participant name],

During your Data Collection Site visit for the Canadian Longitudinal Study on Aging (CLSA) Memory Study, our assessment identified a potential concern about your memory. We encourage you to discuss these results with your family physician. Please find below information that may be given to a physician to provide context for the examination result.

This person is a participant in the Canadian Longitudinal Study on Aging (CLSA) ([www.clsa/elcv.ca](http://www.clsa/elcv.ca)). The study is funded by the Canadian Institutes of Health Research (CIHR) and will involve 50,000 participants aged 45 to 85 years from across Canada who will be followed for up to 20 years.

The CLSA is conducting a substudy on the topic of memory funded by the Public Health Agency of Canada (PHAC). Participants in this study complete a clinical assessment done by a clinician specializing in geriatric psychiatry, neurology, or psychiatry with experience in cognitive assessment. The clinical assessment includes questions about the participant's medical history, a brief cognitive test, a neurocognitive examination, and observation of mobility. A family member or friend who knows the participant well answered questions regarding the participant's cognitive health, ability to complete daily tasks, and behaviour.

*The clinical assessment was completed for research purposes only and was not intended for clinical use.* One component of the clinical assessment was the administration of the Montreal Cognitive Assessment (MoCA) which is used to screen for potential cognitive problems. The participant score on the MoCA was \_\_\_\_\_. The interpretation of a MoCA score requires judgement by an experienced clinician who is aware of other aspects of the participant's health. A score itself does not indicate a specific diagnosis.

If you have any questions, please feel free to contact [Site Coordinator name or Site PI name as per DCS-specific protocol] at [phone number].

Sincerely,

[Clinician name]

10 **Parminder Raina, PhD**  
11 Lead Principal Investigator  
12 Department of Health  
13 Research Methods, Evidence,  
14 and Impact  
15 Faculty of Health Sciences  
16 McMaster University  
17  
18  
19 **Christina Wolfson, PhD**  
20 Co-Principal Investigator  
21 Department of Epidemiology,  
22 Biostatistics & Occupational  
23 Health and Department of  
24 Medicine  
25 McGill University  
26  
27  
28 **Susan Kirkland, PhD**  
29 Co-Principal Investigator  
30 Department of Community  
31 Health & Epidemiology and  
32 Department of Medicine  
33 Dalhousie University  
34  
35  
36  
37  
38  
39  
40  
41  
42  
43  
44  
45  
46  
47  
48  
49 Supported by the Government  
50 of Canada through the  
51 Canadian Institutes of Health  
52 Research and the Canada  
53 Foundation for Innovation.  
54 appuyée par le gouvernement  
55 du Canada par l'entremise des  
56 Instituts de recherche en  
57 santé du Canada et de la  
58 Fondation canadienne pour  
59 l'innovation.



**Supplementary Appendix 8 – Letter for participants without potential concerns about their cognition**

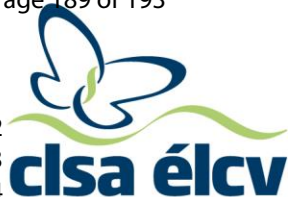

Canadian Longitudinal Study on Aging  
Étude longitudinale canadienne sur le vieillissement

Date

Dear [Participant name],

During your Data Collection Site visit for the Canadian Longitudinal Study on Aging (CLSA) Memory Study, our assessment did not identify any concerns about your memory. Please find below information that may be given to a physician to provide context for the examination result.

This person is a participant in the Canadian Longitudinal Study on Aging (CLSA) ([www.clsa/elcv.ca](http://www.clsa/elcv.ca)). The study is funded by the Canadian Institutes of Health Research (CIHR) and will involve 50,000 participants aged 45 to 85 years from across Canada who will be followed for up to 20 years.

The CLSA is conducting a substudy on the topic of memory funded by the Public Health Agency of Canada (PHAC). Participants in this study complete a clinical assessment done by a clinician specializing in geriatric psychiatry, neurology, or psychiatry with experience in cognitive assessment. The clinical assessment includes questions about the participant's medical history, a brief cognitive test, a neurocognitive examination, and observation of mobility. A family member or friend who knows the participant well answered questions regarding the participant's cognitive health, ability to complete daily tasks, and behaviour.

*The clinical assessment was completed for research purposes only and was not intended for clinical use.* One component of the clinical assessment was the administration of the Montreal Cognitive Assessment (MoCA) which is used to screen for potential cognitive problems. The participant score on the MoCA was \_\_\_\_\_. The interpretation of a MoCA score requires judgement by an experienced clinician who is aware of other aspects of the participant's health. A score itself does not indicate a specific diagnosis.

If you have any questions, please feel free to contact [Site Coordinator name or Site PI name as per DCS-specific protocol] at [phone number].

Sincerely,

[Clinician name]

**Parminder Raina, PhD**

Lead Principal Investigator

Department of Health  
Research Methods, Evidence,  
and Impact  
Faculty of Health Sciences

McMaster University

**Christina Wolfson, PhD**

Co-Principal Investigator

Department of Epidemiology,  
Biostatistics & Occupational  
Health and Department of  
Medicine

McGill University

**Susan Kirkland, PhD**

Co-Principal Investigator

Department of Community  
Health & Epidemiology and  
Department of Medicine

Dalhousie University

Supported by the Government  
of Canada through the  
Canadian Institutes of Health  
Research and the Canada  
Foundation for Innovation.

Appuyée par le gouvernement  
du Canada par l'entremise des  
Instituts de recherche en  
santé du Canada et de la  
Fondation canadienne pour  
l'innovation.

Supplementary Appendix 9, Table 1 – DSM-5 Diagnostic criteria mapped on to CLSA data for mild NCD

| DSM-5 Diagnostic Criteria                                                                                                                                                                            | Components of algorithm in the CLSA                                             | Operationalization                                                                                                                                                                                                                   | Limitations                                                                                                                                                                                                                                                                                                    |
|------------------------------------------------------------------------------------------------------------------------------------------------------------------------------------------------------|---------------------------------------------------------------------------------|--------------------------------------------------------------------------------------------------------------------------------------------------------------------------------------------------------------------------------------|----------------------------------------------------------------------------------------------------------------------------------------------------------------------------------------------------------------------------------------------------------------------------------------------------------------|
| <b>A - Modest cognitive decline in one or more cognitive domains based on:</b><br><br><b>1) concern about mild decline, expressed by individual or reliable informant, or observed by clinicians</b> | Subjective cognitive decline                                                    | Responds "yes" to "Do you feel like your memory is becoming worse" and if yes, responds "strongly agree" or "agree" to "does this worry you?"                                                                                        | Questions not available at baseline                                                                                                                                                                                                                                                                            |
|                                                                                                                                                                                                      | Physician diagnosis of memory problem                                           | Responds "yes" to "Has a doctor ever told you that you have a memory problem"                                                                                                                                                        | Underestimates burden of memory problems                                                                                                                                                                                                                                                                       |
|                                                                                                                                                                                                      | Multifactorial Memory Questionnaire                                             | Individual participant t-scores will be derived and interpreted based on the recommendations of the developer. Participants categorized as "low" or "very low" based on their t-score will be classified as having mild decline      | Questions not available at baseline                                                                                                                                                                                                                                                                            |
|                                                                                                                                                                                                      | <b>2) AND/OR modest impairment documented by objective cognitive assessment</b> | Performance on the Rey Auditory Verbal Learning Test (REY1 and REY2), the Animal Fluency Test (AFT2), and the Mental Alternation Test (MAT)                                                                                          | Mean Z score of >-2.0 but <1.5 on two or more cognitive tests                                                                                                                                                                                                                                                  |
| <b>B - The cognitive deficits do not interfere with capacity for independence in everyday activities</b>                                                                                             | Instrumental Activities of Daily Living (IADL)                                  | Participant reports doing the following activities independently; grocery shopping, money management, housework, preparing meals, medication management, preparing meals, using telephone, getting to places out of walking distance | <ul style="list-style-type: none"> <li>• Self-reported, ideal to have informant reported IADLs</li> <li>• Mobility, hearing, visions, and physical limitations may explain inability to complete IADLs independently. Basic Activities of Daily Living, self-rated and measured hearing/vision, and</li> </ul> |

1  
2  
3  
4  
5  
6  
7  
8  
9  
10  
11  
12  
13  
14  
15  
16  
17  
18  
19  
20  
21  
22  
23  
24  
25  
26  
27  
28  
29  
30  
31  
32  
33  
34  
35  
36  
37  
38  
39  
40  
41  
42  
43  
44  
45  
46  
47

|                                                                                                                                         |                                                                                                                         |                                                                                                                                                                                                                                                                           |                                                                                                                                                                                                                                                                                   |
|-----------------------------------------------------------------------------------------------------------------------------------------|-------------------------------------------------------------------------------------------------------------------------|---------------------------------------------------------------------------------------------------------------------------------------------------------------------------------------------------------------------------------------------------------------------------|-----------------------------------------------------------------------------------------------------------------------------------------------------------------------------------------------------------------------------------------------------------------------------------|
|                                                                                                                                         |                                                                                                                         |                                                                                                                                                                                                                                                                           | physical function tests such as gait speed, the Timed Up and Go, Chair Rise test, balance, and grip strength will be explored to determine if reasons other than problems with cognition may explain the presence of IADL limitations.                                            |
| <b>C- The cognitive deficits do not occur exclusively in the context of a delirium</b>                                                  | Assumed to not be present - participants being seen for a scheduled data collection visit are unlikely to have delirium |                                                                                                                                                                                                                                                                           | The CLSA does not collect this information                                                                                                                                                                                                                                        |
| <b>D - The cognitive deficits are not better explained by another mental disorders (e.g., major depressive disorder, schizophrenia)</b> | The Centre for Epidemiological Studies Depression Scale (CESD-10)                                                       | Exclude participants who have a score of $\geq 10$ indicating the presence of significant depressive symptoms                                                                                                                                                             | May have both a cognitive disorder and a current mood disorder                                                                                                                                                                                                                    |
|                                                                                                                                         | Physician diagnosis of a mood disorder                                                                                  | <p>Responds "yes" to "Has a doctor ever told you that you have a mood disorder such as depression (including manic depression), bipolar disorder, mania, or dysthymia? "</p> <p>Responds "yes" to "Has a doctor ever told you that you suffer from major depression?"</p> | <ul style="list-style-type: none"> <li>Without data on current mood (e.g., CESD-10 score), unclear if mood disorders are historic or active</li> <li>Self-reported data may underestimate</li> <li>May have both a cognitive disorder and a history of mood disorders.</li> </ul> |

Supplementary Appendix 9, Table 2 – DSM-5 Diagnostic criteria mapped on to CLSA data for major NCD

| DSM-5 Diagnostic Criteria                                                                                                                                                                                                                                                                                                                                                                                                                                                                 | Components of algorithm in the CLSA                                                                                                                                                                                                                                                                                                    | Operationalization                                                                                                                                                                                            | Limitations                                                                                                                                                                                                                                                                       |
|-------------------------------------------------------------------------------------------------------------------------------------------------------------------------------------------------------------------------------------------------------------------------------------------------------------------------------------------------------------------------------------------------------------------------------------------------------------------------------------------|----------------------------------------------------------------------------------------------------------------------------------------------------------------------------------------------------------------------------------------------------------------------------------------------------------------------------------------|---------------------------------------------------------------------------------------------------------------------------------------------------------------------------------------------------------------|-----------------------------------------------------------------------------------------------------------------------------------------------------------------------------------------------------------------------------------------------------------------------------------|
| <p><b>A – Evidence of significant cognitive decline from a previous level of performance in one or more cognitive domains (complex attention, executive function, learning and memory, language, perceptual-motor, or social cognition) based on:</b></p> <p><b>3) Concern of the individual, knowledgeable informant, or the clinician</b></p> <p><b>4) AND/OR substantial impairment in cognitive performance, preferably documented by standardized neuropsychological testing</b></p> | Physician diagnosis of dementia or Alzheimer’s disease                                                                                                                                                                                                                                                                                 | Responds "yes" to "Has a doctor ever told you that you have dementia or Alzheimer’s disease?"                                                                                                                 | Underestimates burden of memory problems                                                                                                                                                                                                                                          |
|                                                                                                                                                                                                                                                                                                                                                                                                                                                                                           |                                                                                                                                                                                                                                                                                                                                        | Prescription for dementia-specific medication including cholinesterase inhibitor, or memantine                                                                                                                | Only aware of the medications provided to interviewer by participant                                                                                                                                                                                                              |
|                                                                                                                                                                                                                                                                                                                                                                                                                                                                                           | <p>All participants - Performance on the Rey Auditory Verbal Learning Test (REY1 and REY2), the Animal Fluency Test (AFT2), and the Mental Alternation Test (MAT)</p> <p>Comprehensive cohort participants - the Stroop test, Controlled Oral Word Association Test, and Miami Prospective Memory Tests will additionally be used.</p> | Mean Z score of $\leq -2.0$ on two or more cognitive tests                                                                                                                                                    | <ul style="list-style-type: none"> <li>• CLSA cognitive tests not designed to detect mild/major NCD</li> <li>• Missing data due to participant refusing test, technology issues, and other non-participant related factors</li> </ul>                                             |
| <p><b>B - The cognitive deficits interfere with capacity for independence in everyday activities</b></p>                                                                                                                                                                                                                                                                                                                                                                                  | Instrumental Activities of Daily Living (IADL)                                                                                                                                                                                                                                                                                         | Participant or proxy reports requiring assistance with one or more of the following activities; grocery shopping, money management, housework, preparing meals, medication management, preparing meals, using | <ul style="list-style-type: none"> <li>• Self-reported, ideal to have informant reported IADLs</li> <li>• Mobility, hearing, visions, and physical limitations may explain inability to complete IADLs independently. Basic Activities of Daily Living, self-rated and</li> </ul> |

1  
2  
3  
4  
5  
6  
7  
8  
9  
10  
11  
12  
13  
14  
15  
16  
17  
18  
19  
20  
21  
22  
23  
24  
25  
26  
27  
28  
29  
30  
31  
32  
33  
34  
35  
36  
37  
38  
39  
40  
41  
42  
43  
44  
45  
46  
47

|                                                                                                                                         |                                                                                                                         |                                                                                                                                                                                                                                                                           |                                                                                                                                                                                                                                                                                                  |
|-----------------------------------------------------------------------------------------------------------------------------------------|-------------------------------------------------------------------------------------------------------------------------|---------------------------------------------------------------------------------------------------------------------------------------------------------------------------------------------------------------------------------------------------------------------------|--------------------------------------------------------------------------------------------------------------------------------------------------------------------------------------------------------------------------------------------------------------------------------------------------|
|                                                                                                                                         |                                                                                                                         | telephone, getting to places out of walking distance.                                                                                                                                                                                                                     | measured hearing/vision, and physical function tests such as gait speed, the Timed Up and Go, Chair Rise test, balance, and grip strength will be explored to determine if reasons other than problems with cognition may explain the presences of IADL limitations.                             |
| <b>C- The cognitive deficits do not occur exclusively in the context of a delirium</b>                                                  | Assumed to not be present - participants being seen for a scheduled data collection visit are unlikely to have delirium |                                                                                                                                                                                                                                                                           | The CLSA does not collect this information                                                                                                                                                                                                                                                       |
| <b>D - The cognitive deficits are not better explained by another mental disorders (e.g., major depressive disorder, schizophrenia)</b> | The Centre for Epidemiological Studies Depression Scale (CESD-10)                                                       | Participant has a score of $\geq 10$ indicating the presence of depressive symptoms                                                                                                                                                                                       | May have both a cognitive disorder and a current mood disorder                                                                                                                                                                                                                                   |
|                                                                                                                                         | Physical diagnosis of a mood disorder                                                                                   | <p>Responds "yes" to "Has a doctor ever told you that you have a mood disorder such as depression (including manic depression), bipolar disorder, mania, or dysthymia? "</p> <p>Responds "yes" to "Has a doctor ever told you that you suffer from major depression?"</p> | <ul style="list-style-type: none"> <li>• Without data on current mood (e.g., CESD-10 score), unclear if mood disorders are historic or active</li> <li>• Self-reported data may underestimate</li> <li>• May have both a cognitive disorder and a current or history of mood disorder</li> </ul> |

### Supplementary Appendix 10 – Locally responsible research ethics boards

- Université de Sherbrooke (Project ID 2009-18)
- Hamilton Integrated Research Ethics Board (Project ID 14406)
- Dalhousie University (Project ID 2010-2336)
- University of Manitoba (Project ID H2010:330), McGill University (Project ID A05-E59-10A)
- McGill University Health Centre Research Institute (Project ID: 2018-3497)
- Memorial University of Newfoundland (Project ID 11.003)
- University of Victoria (Project ID 11-320-C)
- Élisabeth Bruyère Research Institute of Ottawa (Project ID M16-10-023)
- University of British Columbia (Project ID H10-02143)
- Island Health (Formerly the Vancouver Island Health Authority, Project ID C2010-80)
- Simon Fraser University (Project ID 2010s0527)
- Calgary Conjoint Health Research Ethics Board (Project E-23489).
