# Supplementary material for: Protocol for validating an algorithm to identify neurocognitive disorders in Canadian Longitudinal Study on Aging participants: an observational study
Source: PubMed Central journal article supplement — BMJ Open. 2023 Nov 1;13(11):e073027. doi: 10.1136/bmjopen-2023-073027 (PMC10626860; doi:10.1136/bmjopen-2023-073027), 2023-11-01
Supplement: bmjopen-2023-073027supp005.pdf [file bmjopen-2023-073027supp005.pdf]

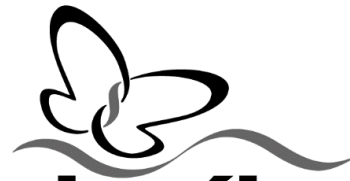

**clsa élcv**

Canadian Longitudinal Study on Aging  
Étude longitudinale canadienne sur le vieillissement

# **Supplementary Appendix 5**

## **- Medical Assessment**

### **(Canadian Longitudinal Study on Aging (CLSA) Memory Study)**

**v1.2, 2022 October 20<sup>th</sup>**

## Table of Contents

|                                                              |    |
|--------------------------------------------------------------|----|
| Sociodemographic Information (SDC) .....                     | 3  |
| Cognitive Status (COG) .....                                 | 8  |
| Medical History (MED) .....                                  | 11 |
| Basic Activities of Daily Living (ADL) .....                 | 19 |
| Instrumental Activities of Daily Living (IADL) .....         | 22 |
| Transportation (TRA) .....                                   | 27 |
| Mood and Behaviour (BHV) .....                               | 29 |
| Physical Examination (EXM).....                              | 32 |
| Montreal Cognitive Assessment (MoCA) .....                   | 42 |
| Preliminary Diagnosis of Neurocognitive Disorder (NCD) ..... | 57 |

## Sociodemographic Information (SDC)

|                 |                                                                                                                                                                                                                                                                                                                                                                                                                                                                                                 |
|-----------------|-------------------------------------------------------------------------------------------------------------------------------------------------------------------------------------------------------------------------------------------------------------------------------------------------------------------------------------------------------------------------------------------------------------------------------------------------------------------------------------------------|
| <b>Overview</b> | <p>These questions obtain basic sociodemographic information from the participant. They function as an interview icebreaker and, by comparison with the most recent response for each question from the main CLSA interviews when available, a check on their remote memory.</p> <p>Clinicians are expected to complete all items in this module. However, they have flexibility in determining the order in which the questions are asked and the specific wording used for each question.</p> |
|-----------------|-------------------------------------------------------------------------------------------------------------------------------------------------------------------------------------------------------------------------------------------------------------------------------------------------------------------------------------------------------------------------------------------------------------------------------------------------------------------------------------------------|

|                                                                                                                        |                                                             |
|------------------------------------------------------------------------------------------------------------------------|-------------------------------------------------------------|
| <b>SDC_1</b>                                                                                                           | <b>SDC_AGEBL_MSP</b>                                        |
| Participant's age in years – <u>based on date of birth provided at CLSA Baseline</u>                                   |                                                             |
| CLINICIAN NOTE: If there is no response shown for this item, the participant did not answer this question at baseline. |                                                             |
| NUMBER                                                                                                                 | [CALCULATED BY PINE USING BASELINE CLSA DATA – AGE_DOB_COM] |

|                                                              |                                        |
|--------------------------------------------------------------|----------------------------------------|
| <b>SDC_2</b>                                                 | <b>SDC_AGE_MSP</b>                     |
| <b>[ALWAYS ASK]</b>                                          |                                        |
| What is the participant's <b>self-reported</b> age in years? |                                        |
| NB_SP                                                        | Age _____ [MASK: MIN=53, MAX=94]       |
| DK_NA                                                        | 8 [DO NOT READ] Don't know / No answer |
| REFUSED                                                      | 9 [DO NOT READ] Refused                |

|                                                                                                                        |                                                                                               |
|------------------------------------------------------------------------------------------------------------------------|-----------------------------------------------------------------------------------------------|
| <b>SDC_3</b>                                                                                                           | <b>SDC_SEXBL_MSP</b>                                                                          |
| Participant's sex – <u>self-reported at CLSA baseline</u>                                                              |                                                                                               |
| CLINICIAN NOTE: If there is no response shown for this item, the participant did not answer this question at baseline. |                                                                                               |
| GENDER                                                                                                                 | [IMPUTED BY PINE USING BASELINE CLSA DATA – SEX_ASK_COM. IF EMPTY, ANSWER 'DATA UNAVAILABLE'] |

|                                                                 |                |                                      |
|-----------------------------------------------------------------|----------------|--------------------------------------|
| SDC_4                                                           | SDC_GENDER_MSP |                                      |
| [ALWAYS ASK]                                                    |                |                                      |
| What is the participant's <b>self-reported</b> gender identity? |                |                                      |
| CODE ONLY ONE RESPONSE                                          |                |                                      |
| MALE                                                            | 1              | Male                                 |
| FEMALE                                                          | 2              | Female                               |
| TRANSMAN                                                        | 3              | Transgender Man/Transman             |
| TRANSWOMAN                                                      | 4              | Transgender Women/Transwoman         |
| GENDERQUEER                                                     | 5              | Genderqueer                          |
| OTSP                                                            | 7              | Other (please specify: _____)        |
| DK_NA                                                           | 8              | [DO NOT READ] Don't know / No answer |
| REFUSED                                                         | 9              | [DO NOT READ] Refused                |

|                                                                                                                        |                                                                                                                                                                                                                                                                                                                                                                                                                                                                                                                                                                                                                                                                                                                                                                                   |  |
|------------------------------------------------------------------------------------------------------------------------|-----------------------------------------------------------------------------------------------------------------------------------------------------------------------------------------------------------------------------------------------------------------------------------------------------------------------------------------------------------------------------------------------------------------------------------------------------------------------------------------------------------------------------------------------------------------------------------------------------------------------------------------------------------------------------------------------------------------------------------------------------------------------------------|--|
| SDC_5                                                                                                                  | SDC_EDU4BL_MSP                                                                                                                                                                                                                                                                                                                                                                                                                                                                                                                                                                                                                                                                                                                                                                    |  |
| [ALWAYS ASK]                                                                                                           |                                                                                                                                                                                                                                                                                                                                                                                                                                                                                                                                                                                                                                                                                                                                                                                   |  |
| Participant's education – <u>self-reported</u> at CLSA Baseline                                                        |                                                                                                                                                                                                                                                                                                                                                                                                                                                                                                                                                                                                                                                                                                                                                                                   |  |
| CLINICIAN NOTE: If there is no response shown for this item, the participant did not answer this question at baseline. |                                                                                                                                                                                                                                                                                                                                                                                                                                                                                                                                                                                                                                                                                                                                                                                   |  |
| EDU4                                                                                                                   | <p>_____ [IMPUTED BY PINE USING BASELINE CLSA DATA]</p> <p><b>1 = Less than secondary school graduation</b> – code if:<br/> ED_ELHS_COM = (1, 2, 3) and<br/> ED_HSGR_COM = 2 and<br/> ED_OTED_COM = 2</p> <p><b>2 = Secondary school graduation, no post-secondary secondary education</b> – code if:<br/> ED_HSGR_COM = 1 and<br/> ED_OTED_COM = 2</p> <p><b>3 = Some post-secondary education</b> – code if:<br/> ED_HIGH_COM = 01</p> <p><b>4 = Post-secondary degree/diploma</b> – code if:<br/> 02 ≤ ED_HIGH_COM ≤ 06 or<br/> ED_HIGH_COM = 97</p> <p><b>9 = At least one required question as not answered</b> – code if:<br/> ED_ELHS_COM = (8,9, EMPTY) or<br/> ED_HSGR_COM = (8,9, EMPTY) or<br/> ED_OTED_COM = (7,8,9, EMPTY) or<br/> ED_HIGH_COM = (98,99, EMPTY)]</p> |  |

|                                                                            |                    |                                                          |
|----------------------------------------------------------------------------|--------------------|----------------------------------------------------------|
| <b>SDC_6</b>                                                               | <b>SDC_EDU_MSP</b> |                                                          |
| <b>[ALWAYS ASK]</b>                                                        |                    |                                                          |
| What is the participant's <b>self-reported</b> highest level of education? |                    |                                                          |
| <b>CODE ONLY ONE RESPONSE</b>                                              |                    |                                                          |
| LESS_SEC                                                                   | 1                  | Less than secondary school graduation                    |
| SEC                                                                        | 2                  | Secondary school graduation, no post-secondary education |
| SOME_POST                                                                  | 3                  | Some post-secondary education                            |
| POST_SEC                                                                   | 4                  | Post-secondary degree/diploma                            |
| DK_NA                                                                      | 8                  | <b>[DO NOT READ]</b> Don't know / No answer              |
| REFUSED                                                                    | 9                  | <b>[DO NOT READ]</b> Refused                             |

|                                                                   |                    |                                             |
|-------------------------------------------------------------------|--------------------|---------------------------------------------|
| <b>SDC_7</b>                                                      | <b>SDC_LBF_MSP</b> |                                             |
| <b>[ALWAYS ASK]</b>                                               |                    |                                             |
| What is the participant's <b>self-reported</b> employment status? |                    |                                             |
| <b>CODE ONLY ONE RESPONSE</b>                                     |                    |                                             |
| COM_RET                                                           | 1                  | Completely retired                          |
| PAR_RET                                                           | 2                  | Partly retired                              |
| NOT_RET_WORK                                                      | 3                  | Not retired and currently working           |
| NOT_RET_NO_WORK                                                   | 4                  | Not retired and not currently working       |
| NEVER_WORKED                                                      | 5                  | Never held a paid job                       |
| DK_NA                                                             | 8                  | <b>[DO NOT READ]</b> Don't know / No answer |
| REFUSED                                                           | 9                  | <b>[DO NOT READ]</b> Refused                |

|                                                                                                                                                                        |                                                                                                                                                                                                                                                                                                                                                                                                                                                                                                                                                                                                                                                                                                                                                                               |
|------------------------------------------------------------------------------------------------------------------------------------------------------------------------|-------------------------------------------------------------------------------------------------------------------------------------------------------------------------------------------------------------------------------------------------------------------------------------------------------------------------------------------------------------------------------------------------------------------------------------------------------------------------------------------------------------------------------------------------------------------------------------------------------------------------------------------------------------------------------------------------------------------------------------------------------------------------------|
| <b>SDC_8</b>                                                                                                                                                           | <b>SDC_OCCBL_MSP</b>                                                                                                                                                                                                                                                                                                                                                                                                                                                                                                                                                                                                                                                                                                                                                          |
| <b>[ASK IF SDC_LBF_MSP ≠ NEVER_WORKED]</b>                                                                                                                             |                                                                                                                                                                                                                                                                                                                                                                                                                                                                                                                                                                                                                                                                                                                                                                               |
| Type of job participant did for the longest period of time – <u>self-reported at CLSA Baseline</u>                                                                     |                                                                                                                                                                                                                                                                                                                                                                                                                                                                                                                                                                                                                                                                                                                                                                               |
| <b>CLINICIAN NOTE:</b> Please note that this is not the “main occupation” of the participant. Rather it is the job at which the participant had worked at the longest. |                                                                                                                                                                                                                                                                                                                                                                                                                                                                                                                                                                                                                                                                                                                                                                               |
| If there is no response shown for this item, the participant did not answer this question at baseline.                                                                 |                                                                                                                                                                                                                                                                                                                                                                                                                                                                                                                                                                                                                                                                                                                                                                               |
| OCC_TYPE                                                                                                                                                               | <p>CLSA DATA [IMPUTED BY PINE USING BASELINE]</p> <p><b>Never worked</b> – code if:<br/>LBF_EVER_COM = “NO”</p> <p><b>[open text for LFP_TYPE_SP_COM]</b> – code if:<br/>(RET_RTRD_COM = 1 or<br/>RET_RTRD_COM = 2) and<br/>LFP_LNGST_COM = 1</p> <p><b>[open text for LFP_LGTYPE_SP_COM]</b> – code if:<br/>(RET_RTRD_COM = 1 or<br/>RET_RTRD_COM = 2) and<br/>LFP_LNGST_COM = 2</p> <p><b>[open text for LBF_TYPE_NB_COM]</b> – code if:<br/>RET_RTRD_COM = 3 and<br/>LBF_LGEVER_COM = 2</p> <p><b>[open text for LBF_LGTYPE_SP_COM]</b> – code if:<br/>RET_RTRD_COM = 3 and<br/>LBF_LGEVER_COM = 1</p> <p><b>Data unavailable</b> – code if:<br/>ALL required questions do not fit into categories above, or ALL are DK_NA<br/>or REFUSED or not answered/missing data</p> |

|                                                                                  |                    |
|----------------------------------------------------------------------------------|--------------------|
| <b>SDC_9</b>                                                                     | <b>SDC_OCC_MSP</b> |
| <b>[ASK IF SDC_LBF_MSP = COM_RET, PAR_RET, NOT_RET_WORK, or NOT_RET_NO_WORK]</b> |                    |
| What is the participant’s <b>self-reported</b> primary occupation?               |                    |

|                                                                                                                                                                                                                                                                                                 |            |                                             |
|-------------------------------------------------------------------------------------------------------------------------------------------------------------------------------------------------------------------------------------------------------------------------------------------------|------------|---------------------------------------------|
| <b>CLINICIAN NOTE:</b> Provide a brief description of the occupation. Please note, this question refers to the primary occupation of the participant while the previous question from the main CLSA interview refers to the occupation that the participant did for the longest period of time. |            |                                             |
| OCC_SP                                                                                                                                                                                                                                                                                          | Occupation | _____                                       |
| DK_NA                                                                                                                                                                                                                                                                                           | 8          | <b>[DO NOT READ]</b> Don't know / No answer |
| REFUSED                                                                                                                                                                                                                                                                                         | 9          | <b>[DO NOT READ]</b> Refused                |

|                                                                                                                                                                                                                          |                      |     |
|--------------------------------------------------------------------------------------------------------------------------------------------------------------------------------------------------------------------------|----------------------|-----|
| <b>SDC_10</b>                                                                                                                                                                                                            | <b>SDC_NOTES_MSP</b> |     |
| <b>[ALWAYS ASK]</b>                                                                                                                                                                                                      |                      |     |
| Do you have any additional notes to include for this module? For example, are there any other sociodemographic characteristics that should be taken into account when interpreting the results of the cognitive testing? |                      |     |
| YES                                                                                                                                                                                                                      | 1                    | Yes |
| NO                                                                                                                                                                                                                       | 2                    | No  |

|                                                                                                                                     |                        |  |
|-------------------------------------------------------------------------------------------------------------------------------------|------------------------|--|
| <b>SDC_11</b>                                                                                                                       | <b>SDC_NOTESSP_MSP</b> |  |
| <b>[ASK IF SDC_NOTES_MSP = YES]</b>                                                                                                 |                        |  |
| <b>CLINICIAN NOTE:</b> Please do not enter any identifying information in this section.                                             |                        |  |
| Please provide any relevant notes (e.g., how congruent the participant's responses were to previously collected information) below: |                        |  |

SDC\_END

## Cognitive Status (COG)

|                 |                                                                                                                                                                                                                                                                                                                                                                                                                                                                                                   |
|-----------------|---------------------------------------------------------------------------------------------------------------------------------------------------------------------------------------------------------------------------------------------------------------------------------------------------------------------------------------------------------------------------------------------------------------------------------------------------------------------------------------------------|
| <b>Overview</b> | <p>The purpose of this section is to assess if the participant has experienced cognitive decline. Participants that report the presence of cognitive decline will be asked to provide details regarding the onset, progression, and symptoms related to the cognitive decline.</p> <p>Clinicians are expected to complete all items in this module. However, they have flexibility in determining the order in which the questions are asked and the specific wording used for each question.</p> |
|-----------------|---------------------------------------------------------------------------------------------------------------------------------------------------------------------------------------------------------------------------------------------------------------------------------------------------------------------------------------------------------------------------------------------------------------------------------------------------------------------------------------------------|

|                                                                                   |                    |                                             |
|-----------------------------------------------------------------------------------|--------------------|---------------------------------------------|
| <b>COG_1</b>                                                                      | <b>COG_DEC_MSP</b> |                                             |
| <b>[ALWAYS ASK]</b>                                                               |                    |                                             |
| Has the participant reported experiencing cognitive decline?                      |                    |                                             |
| <b>CLINICIAN NOTE:</b> This question should be asked directly to the participant. |                    |                                             |
| YES                                                                               | 1                  | Yes                                         |
| NO                                                                                | 2                  | No                                          |
| DK_NA                                                                             | 8                  | <b>[DO NOT READ]</b> Don't know / No answer |
| REFUSED                                                                           | 9                  | <b>[DO NOT READ]</b> Refused                |

|                                                                                                                       |                    |                                                   |
|-----------------------------------------------------------------------------------------------------------------------|--------------------|---------------------------------------------------|
| <b>COG_2</b>                                                                                                          | <b>COG_YRS_MSP</b> |                                                   |
| <b>[ASK IF COG_DEC_MSP = YES]</b>                                                                                     |                    |                                                   |
| How many years has the participant reported experiencing cognitive decline?                                           |                    |                                                   |
| <b>CLINICIAN NOTE:</b> This question should be asked directly to the participant. Please provide the number of years. |                    |                                                   |
| LESS_YR                                                                                                               | 001                | Less than one year                                |
| YEARS                                                                                                                 | Years              | _____ <b>[MASK: MIN=1, MAX=PARTICIPANT'S AGE]</b> |
| DK_NA                                                                                                                 | 998                | <b>[DO NOT READ]</b> Don't know / No answer       |
| REFUSED                                                                                                               | 999                | <b>[DO NOT READ]</b> Refused                      |

|              |                    |  |
|--------------|--------------------|--|
| <b>COG_3</b> | <b>COG_SEV_MSP</b> |  |
|--------------|--------------------|--|



|                                                                                   |   |                                                                          |
|-----------------------------------------------------------------------------------|---|--------------------------------------------------------------------------|
| <b>[ASK IF COG_DEC_MSP = YES]</b>                                                 |   |                                                                          |
| The participant describes the severity of their cognitive decline as...           |   |                                                                          |
| <b>CODE ONLY ONE RESPONSE</b>                                                     |   |                                                                          |
| <b>CLINICIAN NOTE:</b> This question should be asked directly to the participant. |   |                                                                          |
| IRRT                                                                              | 1 | Present and may be an irritant but not a concern of theirs               |
| WORR                                                                              | 2 | Worrisome but not having overt impact on daily life                      |
| IMPT                                                                              | 3 | Having an impact on their life (e.g., occupation, autonomy/independence) |
| DK_NA                                                                             | 8 | <b>[DO NOT READ]</b> Don't know / No answer                              |
| REFUSED                                                                           | 9 | <b>[DO NOT READ]</b> Refused                                             |

|                                                                      |                    |                                             |
|----------------------------------------------------------------------|--------------------|---------------------------------------------|
| <b>COG_4</b>                                                         | <b>COG_ONS_MSP</b> |                                             |
| <b>[ASK IF COG_DEC_MSP = YES]</b>                                    |                    |                                             |
| The participant believes the onset of their cognitive decline was... |                    |                                             |
| <b>CODE ONLY ONE RESPONSE</b>                                        |                    |                                             |
| GRAD                                                                 | 1                  | Gradual                                     |
| ABRT                                                                 | 2                  | Abrupt                                      |
| DK_NA                                                                | 8                  | <b>[DO NOT READ]</b> Don't know / No answer |
| REFUSED                                                              | 9                  | <b>[DO NOT READ]</b> Refused                |

|                                                                                          |                    |                                             |
|------------------------------------------------------------------------------------------|--------------------|---------------------------------------------|
| <b>COG_5</b>                                                                             | <b>COG_VAS_MSP</b> |                                             |
| <b>[ASK IF COG_ONS_MSP = ABRT]</b>                                                       |                    |                                             |
| The participant believes their cognitive decline was related to a cerebrovascular event. |                    |                                             |
| YES                                                                                      | 1                  | Yes                                         |
| NO                                                                                       | 2                  | No                                          |
| DK_NA                                                                                    | 8                  | <b>[DO NOT READ]</b> Don't know / No answer |
| REFUSED                                                                                  | 9                  | <b>[DO NOT READ]</b> Refused                |

|                                   |                    |  |
|-----------------------------------|--------------------|--|
| <b>COG_6</b>                      | <b>COG_PRO_MSP</b> |  |
| <b>[ASK IF COG_DEC_MSP = YES]</b> |                    |  |

|                                                                              |   |                                        |
|------------------------------------------------------------------------------|---|----------------------------------------|
| The participant believes the trajectory of their cognitive impairment was... |   |                                        |
| <b>CODE ONLY ONE RESPONSE</b>                                                |   |                                        |
| NONE                                                                         | 1 | Improvement/none-stability after onset |
| GRAD                                                                         | 2 | Gradual or insidious progression       |
| STEP                                                                         | 3 | Stepwise progression                   |
| FLUC                                                                         | 4 | Fluctuating                            |
| DK_NA                                                                        | 8 | [DO NOT READ] Don't know / No answer   |
| REFUSED                                                                      | 9 | [DO NOT READ] Refused                  |

|                                                                                                                                                                                                   |                      |     |
|---------------------------------------------------------------------------------------------------------------------------------------------------------------------------------------------------|----------------------|-----|
| <b>COG_7</b>                                                                                                                                                                                      | <b>COG_NOTES_MSP</b> |     |
| <b>[ALWAYS ASK]</b>                                                                                                                                                                               |                      |     |
| Do you have any additional notes to include for this module (e.g., whether you concur with the participant's perceptions of presence, severity, onset, and progression of any cognitive decline)? |                      |     |
| YES                                                                                                                                                                                               | 1                    | Yes |
| NO                                                                                                                                                                                                | 2                    | No  |

|                                                                                         |                        |  |
|-----------------------------------------------------------------------------------------|------------------------|--|
| <b>COG_8</b>                                                                            | <b>COG_NOTESSP_MSP</b> |  |
| <b>[ASK IF COG_NOTES_MSP = YES]</b>                                                     |                        |  |
| <b>CLINICIAN NOTE:</b> Please do not enter any identifying information in this section. |                        |  |
| Please provide any notes below:                                                         |                        |  |

**COG\_END**

## Medical History (MED)

---

|                 |                                                                                                                                                                                                                                                                                                                                                                                                                                                                                                                                                                                                           |
|-----------------|-----------------------------------------------------------------------------------------------------------------------------------------------------------------------------------------------------------------------------------------------------------------------------------------------------------------------------------------------------------------------------------------------------------------------------------------------------------------------------------------------------------------------------------------------------------------------------------------------------------|
| <b>Overview</b> | <p>The medical history module captures information that will assist the examining physician in determining if any observed cognitive limitations are secondary to medical conditions such as neurodegenerative diseases. This information may also increase the confidence in the physician's diagnosis based on the absence or presence of risk factors for neurocognitive disorders.</p> <p>Clinicians are expected to complete all items in this module. However, they have flexibility in determining the order in which the questions are asked and the specific wording used for each question.</p> |
|-----------------|-----------------------------------------------------------------------------------------------------------------------------------------------------------------------------------------------------------------------------------------------------------------------------------------------------------------------------------------------------------------------------------------------------------------------------------------------------------------------------------------------------------------------------------------------------------------------------------------------------------|

| MED_1                                                                                        | MED_CON_MSP |                                                                                                     |
|----------------------------------------------------------------------------------------------|-------------|-----------------------------------------------------------------------------------------------------|
| <b>[ALWAYS ASK]</b>                                                                          |             |                                                                                                     |
| Does the participant have any of the following medical conditions?                           |             |                                                                                                     |
| <b>MULTIPLE RESPONSES ALLOWED (EXCEPT IF 96, 98 OR 99 ARE SELECTED), CODE ALL THAT APPLY</b> |             |                                                                                                     |
| CAD                                                                                          | 1           | Coronary artery disease                                                                             |
| HF                                                                                           | 2           | Heart failure                                                                                       |
| AF                                                                                           | 3           | Atrial fibrillation/flutter                                                                         |
| TIA                                                                                          | 4           | Transient ischemic attack (TIA)                                                                     |
| STR                                                                                          | 5           | Cerebrovascular accident (stroke)                                                                   |
| HEM                                                                                          | 6           | Intracerebral hemorrhage                                                                            |
| HYP                                                                                          | 7           | Hypertension                                                                                        |
| DIA                                                                                          | 8           | Diabetes mellitus                                                                                   |
| DYS                                                                                          | 9           | Dyslipidemia                                                                                        |
| PKD                                                                                          | 10          | Parkinson's Disease or Parkinsonism                                                                 |
| DEP                                                                                          | 11          | Depression                                                                                          |
| ANX                                                                                          | 12          | Anxiety disorder                                                                                    |
| PSY                                                                                          | 13          | Psychotic illness                                                                                   |
| HR                                                                                           | 14          | Hearing impairment                                                                                  |
| VS                                                                                           | 15          | Visual impairment                                                                                   |
| SM                                                                                           | 16          | Impaired sense of smell                                                                             |
| DEM                                                                                          | 17          | Dementia                                                                                            |
| DELI                                                                                         | 18          | Suspected delirium (in the past 5 years)                                                            |
| IN                                                                                           | 19          | Insomnia                                                                                            |
| REM                                                                                          | 20          | REM-Sleep Behaviour Disorder                                                                        |
| OSA                                                                                          | 21          | Obstructive Sleep Apnea                                                                             |
| HYPT                                                                                         | 22          | Hypothyroidism                                                                                      |
| B12                                                                                          | 23          | Vitamin B12 deficiency                                                                              |
| OTSP                                                                                         | 24          | Other conditions relevant to cognitive status (e.g. cancer and/or cancer treatments); specify _____ |
| NONE                                                                                         | 96          | None of the above                                                                                   |
| DK_NA                                                                                        | 98          | <b>[DO NOT READ]</b> Don't know / No answer                                                         |
| REFUSED                                                                                      | 99          | <b>[DO NOT READ]</b> Refused                                                                        |

|                                                                         |                    |                                             |
|-------------------------------------------------------------------------|--------------------|---------------------------------------------|
| <b>MED_2</b>                                                            | <b>MED_TBI_MSP</b> |                                             |
| <b>[ALWAYS ASK]</b>                                                     |                    |                                             |
| Has the participant suffered a head injury or a concussion in the past? |                    |                                             |
| YES                                                                     | 1                  | Yes                                         |
| NO                                                                      | 2                  | No                                          |
| DK_NA                                                                   | 8                  | <b>[DO NOT READ]</b> Don't know / No answer |
| REFUSED                                                                 | 9                  | <b>[DO NOT READ]</b> Refused                |

|                                                                                                             |                     |                                             |
|-------------------------------------------------------------------------------------------------------------|---------------------|---------------------------------------------|
| <b>MED_3</b>                                                                                                | <b>MED_TBI1_MSP</b> |                                             |
| <b>[ASK IF MED_TBI_MSP = YES]</b>                                                                           |                     |                                             |
| How many head injuries or concussions has the participant had in his/her lifetime?                          |                     |                                             |
| <b>CLINICIAN NOTES:</b> If the informant cannot remember exact number, please probe for their best estimate |                     |                                             |
| TBI_NUM                                                                                                     | Number              | _____ <b>[MASK: MIN=1]</b>                  |
| DK_NA                                                                                                       | 8                   | <b>[DO NOT READ]</b> Don't know / No answer |
| REFUSED                                                                                                     | 9                   | <b>[DO NOT READ]</b> Refused                |

|                                                                                                                                                      |                     |                                                       |
|------------------------------------------------------------------------------------------------------------------------------------------------------|---------------------|-------------------------------------------------------|
| <b>MED_4</b>                                                                                                                                         | <b>MED_TBI2_MSP</b> |                                                       |
| <b>[ASK IF MED_TBI_MSP = YES]</b>                                                                                                                    |                     |                                                       |
| At what age or in what year did the participant have the most serious head injury?                                                                   |                     |                                                       |
| <b>CLINICIAN NOTES:</b> If the informant cannot remember the specific year, please probe for their best estimation of when the head injury occurred. |                     |                                                       |
| YR_SP                                                                                                                                                | Year                | _____ <b>[MASK: MIN=BIRTH YEAR, MAX=CURRENT YEAR]</b> |
| NB_SP                                                                                                                                                | Age                 | _____ <b>[MASK: MIN=1, MAX=CURRENT AGE]</b>           |
| DK_NA                                                                                                                                                | 998                 | <b>[DO NOT READ]</b> Don't know / No answer           |
| REFUSED                                                                                                                                              | 999                 | <b>[DO NOT READ]</b> Refused                          |

|                                                                                                      |                     |                                                |
|------------------------------------------------------------------------------------------------------|---------------------|------------------------------------------------|
| <b>MED_5</b>                                                                                         | <b>MED_TBI3_MSP</b> |                                                |
| <b>[ASK IF MED_TBI3_MSP = YES]</b>                                                                   |                     |                                                |
| Did the most serious head injury result in...?                                                       |                     |                                                |
| <b>READ LIST, MULTIPLE RESPONSES ALLOWED (EXCEPT IF 6, 8 OR 9 ARE SELECTED), CODE ALL THAT APPLY</b> |                     |                                                |
| DZ                                                                                                   | 1                   | Being dazed, confused, or "seeing stars"       |
| DRM                                                                                                  | 2                   | Not remembering the injury                     |
| KO                                                                                                   | 3                   | Losing consciousness (knocked out)             |
| NONE                                                                                                 | 6                   | Head injury did not result in any of the above |
| DK_NA                                                                                                | 8                   | <b>[DO NOT READ]</b> Don't know / No answer    |
| REFUSED                                                                                              | 9                   | <b>[DO NOT READ]</b> Refused                   |

|                                          |                     |                                             |
|------------------------------------------|---------------------|---------------------------------------------|
| <b>MED_6</b>                             | <b>MED_TBI4_MSP</b> |                                             |
| <b>[ASK IF MED_TBI3_MSP = KO]</b>        |                     |                                             |
| How long did you lose consciousness for? |                     |                                             |
| <b>READ LIST, CODE ONLY ONE RESPONSE</b> |                     |                                             |
| KO1                                      | 1                   | Less than a minute                          |
| KO20                                     | 2                   | 1-20 minutes                                |
| KO20MORE                                 | 3                   | Longer than 20 minutes                      |
| DK_NA                                    | 8                   | <b>[DO NOT READ]</b> Don't know / No answer |
| REFUSED                                  | 9                   | <b>[DO NOT READ]</b> Refused                |

|                                                                                                                                                                                                                                                                                                                                                                                                                                                                                                                                                                                                                                                                                                                                                                                                                                                                                                                                                                                                                                                                                                                                                                                                                                                                                                                                                                              |                     |                                                                                                         |
|------------------------------------------------------------------------------------------------------------------------------------------------------------------------------------------------------------------------------------------------------------------------------------------------------------------------------------------------------------------------------------------------------------------------------------------------------------------------------------------------------------------------------------------------------------------------------------------------------------------------------------------------------------------------------------------------------------------------------------------------------------------------------------------------------------------------------------------------------------------------------------------------------------------------------------------------------------------------------------------------------------------------------------------------------------------------------------------------------------------------------------------------------------------------------------------------------------------------------------------------------------------------------------------------------------------------------------------------------------------------------|---------------------|---------------------------------------------------------------------------------------------------------|
| <b>MED_7</b>                                                                                                                                                                                                                                                                                                                                                                                                                                                                                                                                                                                                                                                                                                                                                                                                                                                                                                                                                                                                                                                                                                                                                                                                                                                                                                                                                                 | <b>MED_MED2_MSP</b> |                                                                                                         |
| <b>[ALWAYS ASK]</b>                                                                                                                                                                                                                                                                                                                                                                                                                                                                                                                                                                                                                                                                                                                                                                                                                                                                                                                                                                                                                                                                                                                                                                                                                                                                                                                                                          |                     |                                                                                                         |
| Which of the following medications is the participant currently taking?                                                                                                                                                                                                                                                                                                                                                                                                                                                                                                                                                                                                                                                                                                                                                                                                                                                                                                                                                                                                                                                                                                                                                                                                                                                                                                      |                     |                                                                                                         |
| <b>MULTIPLE RESPONSES ALLOWED (EXCEP IF 96, 98 OR 99 ARE SELECTED), CODE ALL THAT APPLY</b>                                                                                                                                                                                                                                                                                                                                                                                                                                                                                                                                                                                                                                                                                                                                                                                                                                                                                                                                                                                                                                                                                                                                                                                                                                                                                  |                     |                                                                                                         |
| <p><b>CLINICIAN NOTES:</b> If the participant does not bring in a list of medications or the medications themselves for review, please select option “Don’t know / No answer”. If you feel that the medication is an essential data element, you can ask if you can call the participant after the assessment when they are home and have access to their medications. Alternatively, you may also ask the participant if he/she would like you to contact the informant about which medications are being used.</p> <p>To determine if a medication has moderate to high anticholinergic activity, please refer to: <a href="https://www.rxfiles.ca/rxfiles/uploads/documents/Psyc-anticholinergic-Ref%20List%20SPDP-complete.pdf">https://www.rxfiles.ca/rxfiles/uploads/documents/Psyc-anticholinergic-Ref%20List%20SPDP-complete.pdf</a></p> <p>If the participant is taking a medication with moderate/high anticholinergic activity that also falls under another listed category, please select both options. For example, if a participant is taking desipramine for the treatment of depression, select the options “anti-depressants” and “drugs with moderate/high anticholinergic activity”.</p> <p>If the participant is not taking a medication regularly but rather as required, please include details in the “Notes” section at the end of this module.</p> |                     |                                                                                                         |
| DEP                                                                                                                                                                                                                                                                                                                                                                                                                                                                                                                                                                                                                                                                                                                                                                                                                                                                                                                                                                                                                                                                                                                                                                                                                                                                                                                                                                          | 01                  | Anti-depressants (whether used for depression, anxiety or other reason)                                 |
| PSY                                                                                                                                                                                                                                                                                                                                                                                                                                                                                                                                                                                                                                                                                                                                                                                                                                                                                                                                                                                                                                                                                                                                                                                                                                                                                                                                                                          | 02                  | Anti-psychotics                                                                                         |
| SED                                                                                                                                                                                                                                                                                                                                                                                                                                                                                                                                                                                                                                                                                                                                                                                                                                                                                                                                                                                                                                                                                                                                                                                                                                                                                                                                                                          | 03                  | Hypnotics and sedatives (whether used for insomnia, anxiety or other reason)                            |
| CHL                                                                                                                                                                                                                                                                                                                                                                                                                                                                                                                                                                                                                                                                                                                                                                                                                                                                                                                                                                                                                                                                                                                                                                                                                                                                                                                                                                          | 04                  | Drugs with moderate/high anticholinergic activity including prescribed and over the counter medications |
| CON                                                                                                                                                                                                                                                                                                                                                                                                                                                                                                                                                                                                                                                                                                                                                                                                                                                                                                                                                                                                                                                                                                                                                                                                                                                                                                                                                                          | 05                  | Anticonvulsants                                                                                         |
| PKD                                                                                                                                                                                                                                                                                                                                                                                                                                                                                                                                                                                                                                                                                                                                                                                                                                                                                                                                                                                                                                                                                                                                                                                                                                                                                                                                                                          | 06                  | Antiparkinsonian                                                                                        |
| OPI                                                                                                                                                                                                                                                                                                                                                                                                                                                                                                                                                                                                                                                                                                                                                                                                                                                                                                                                                                                                                                                                                                                                                                                                                                                                                                                                                                          | 07                  | Opioids                                                                                                 |
| COG                                                                                                                                                                                                                                                                                                                                                                                                                                                                                                                                                                                                                                                                                                                                                                                                                                                                                                                                                                                                                                                                                                                                                                                                                                                                                                                                                                          | 08                  | Cognitive enhancers (cholinesterase inhibitor, memantine)                                               |
| OT                                                                                                                                                                                                                                                                                                                                                                                                                                                                                                                                                                                                                                                                                                                                                                                                                                                                                                                                                                                                                                                                                                                                                                                                                                                                                                                                                                           | 09                  | Other medication that you think may affect cognition: Specify: _____                                    |
| NONE_                                                                                                                                                                                                                                                                                                                                                                                                                                                                                                                                                                                                                                                                                                                                                                                                                                                                                                                                                                                                                                                                                                                                                                                                                                                                                                                                                                        | 96                  | None of the above                                                                                       |
| DK_NA                                                                                                                                                                                                                                                                                                                                                                                                                                                                                                                                                                                                                                                                                                                                                                                                                                                                                                                                                                                                                                                                                                                                                                                                                                                                                                                                                                        | 98                  | <b>[DO NOT READ]</b> Don’t know / No answer                                                             |
| REFUSED                                                                                                                                                                                                                                                                                                                                                                                                                                                                                                                                                                                                                                                                                                                                                                                                                                                                                                                                                                                                                                                                                                                                                                                                                                                                                                                                                                      | 99                  | <b>[DO NOT READ]</b> Refused                                                                            |

|                                              |                          |  |
|----------------------------------------------|--------------------------|--|
| <b>MED_8</b>                                 | <b>MED_SMKSTATUS_MSP</b> |  |
| <b>[ALWAYS ASK]</b>                          |                          |  |
| What is the participant’s smoking status...? |                          |  |
| <b>READ LIST, CODE ONLY ONE RESPONSE</b>     |                          |  |

|          |   |                                                   |
|----------|---|---------------------------------------------------|
| YES      | 1 | Yes, he/she currently smokes                      |
| NEVER    | 2 | No, he/she does not currently smoke and never has |
| FORM_DAY | 4 | Former daily smoker (non-smoker now)              |
| FORM_OCC | 5 | Former occasional smoker (non-smoker now)         |
| DK_NA    | 8 | <b>[DO NOT READ]</b> Don't know / No answer       |
| REFUSED  | 9 | <b>[DO NOT READ]</b> Refused                      |

|                                                 |                    |                                                              |
|-------------------------------------------------|--------------------|--------------------------------------------------------------|
| <b>MED_9</b>                                    | <b>MED_CAN_MSP</b> |                                                              |
| <b>[ALWAYS ASK]</b>                             |                    |                                                              |
| Does the participant use any cannabis products? |                    |                                                              |
| <b>CODE ONLY ONE RESPONSE</b>                   |                    |                                                              |
| YES                                             | 1                  | Yes, he/she currently uses cannabis products                 |
| NEVER                                           | 2                  | No, he/she does not and has never used cannabis products     |
| FORMER                                          | 3                  | Former cannabis user, but does not use cannabis products now |
| DK_NA                                           | 8                  | <b>[DO NOT READ]</b> Don't know / No answer                  |
| REFUSED                                         | 9                  | <b>[DO NOT READ]</b> Refused                                 |

|                                            |                    |                                                    |
|--------------------------------------------|--------------------|----------------------------------------------------|
| <b>MED_10</b>                              | <b>MED_ALC_MSP</b> |                                                    |
| <b>[ALWAYS ASK]</b>                        |                    |                                                    |
| What is the participant's drinking status? |                    |                                                    |
| <b>CODE ONLY ONE RESPONSE</b>              |                    |                                                    |
| NEVER                                      | 1                  | Never drank alcohol                                |
| FORMER                                     | 2                  | Used to drink alcohol but does not currently drink |
| CURRENT                                    | 3                  | Currently consumes alcohol                         |
| DK_NA                                      | 8                  | <b>[DO NOT READ]</b> Don't know / No answer        |
| REFUSED                                    | 9                  | <b>[DO NOT READ]</b> Refused                       |

|                                                                                                                                                                                                                                             |                       |                                             |
|---------------------------------------------------------------------------------------------------------------------------------------------------------------------------------------------------------------------------------------------|-----------------------|---------------------------------------------|
| <b>MED_11</b>                                                                                                                                                                                                                               | <b>MED_ALCNMB_MSP</b> |                                             |
| <b>[ASK IF MED_ALC_MSP = CURRENT]</b>                                                                                                                                                                                                       |                       |                                             |
| A "standard" drink is considered 12 ounces of regular beer (~5% alcohol), 5 ounces of wine (~12% alcohol), or 1.5 ounces of distilled spirits (~40% alcohol). How many estimated standardized drinks per week does the participant consume? |                       |                                             |
| ALC_NB                                                                                                                                                                                                                                      | Number                | _____ <b>[MASK: MIN=0, MAX=200]</b>         |
| DK_NA                                                                                                                                                                                                                                       | 8                     | <b>[DO NOT READ]</b> Don't know / No answer |
| REFUSED                                                                                                                                                                                                                                     | 9                     | <b>[DO NOT READ]</b> Refused                |



|                                                                                                        |                        |                                             |
|--------------------------------------------------------------------------------------------------------|------------------------|---------------------------------------------|
| <b>MED_12</b>                                                                                          | <b>MED_ALCMLFQ_MSP</b> |                                             |
| <b>[ASK IF MED_ALC_MSP = CURRENT AND SDC_SEXBL_MSP = MALE]</b>                                         |                        |                                             |
| In the past 12 months, has the participant consumed 5 or more drinks in 2 hours at least once a month? |                        |                                             |
| YES                                                                                                    | 1                      | Yes                                         |
| NO                                                                                                     | 2                      | No                                          |
| DK_NA                                                                                                  | 8                      | <b>[DO NOT READ]</b> Don't know / No answer |
| REFUSED                                                                                                | 9                      | <b>[DO NOT READ]</b> Refused                |

|                                                                                                        |                        |                                             |
|--------------------------------------------------------------------------------------------------------|------------------------|---------------------------------------------|
| <b>MED_13</b>                                                                                          | <b>MED_ALCFMFQ_MSP</b> |                                             |
| <b>[ASK IF MED_ALC_MSP = CURRENT AND SDC_SEXBL_MSP = FEMALE]</b>                                       |                        |                                             |
| In the past 12 months, has the participant consumed 4 or more drinks in 2 hours at least once a month? |                        |                                             |
| YES                                                                                                    | 1                      | Yes                                         |
| NO                                                                                                     | 2                      | No                                          |
| DK_NA                                                                                                  | 8                      | <b>[DO NOT READ]</b> Don't know / No answer |
| REFUSED                                                                                                | 9                      | <b>[DO NOT READ]</b> Refused                |

|                                                                                                                |                    |                                             |
|----------------------------------------------------------------------------------------------------------------|--------------------|---------------------------------------------|
| <b>MED_14</b>                                                                                                  | <b>MED_FAM_MSP</b> |                                             |
| <b>[ALWAYS ASK]</b>                                                                                            |                    |                                             |
| Does the participant have a first degree relative who has been diagnosed with dementia or Alzheimer's Disease? |                    |                                             |
| <b>CLINICIAN NOTE:</b> First degree relatives include biological parents, siblings, or children                |                    |                                             |
| YES                                                                                                            | 1                  | Yes                                         |
| NO                                                                                                             | 2                  | No                                          |
| DK_NA                                                                                                          | 8                  | <b>[DO NOT READ]</b> Don't know / No answer |
| REFUSED                                                                                                        | 9                  | <b>[DO NOT READ]</b> Refused                |

|                     |                      |  |
|---------------------|----------------------|--|
| <b>MED_15</b>       | <b>MED_NOTES_MSP</b> |  |
| <b>[ALWAYS ASK]</b> |                      |  |

|                                                                                                                                                                                                                                                                                       |   |     |
|---------------------------------------------------------------------------------------------------------------------------------------------------------------------------------------------------------------------------------------------------------------------------------------|---|-----|
| Do you have any additional notes to include for this module? For example, are there any other details regarding the participant's medical history that should be taken into account when interpreting the results of the cognitive testing such as the use of non-prescription drugs? |   |     |
| YES                                                                                                                                                                                                                                                                                   | 1 | Yes |
| NO                                                                                                                                                                                                                                                                                    | 2 | No  |

|                                                                                         |                        |
|-----------------------------------------------------------------------------------------|------------------------|
| <b>MED_16</b>                                                                           | <b>MED_NOTESSP_MSP</b> |
| <b>[ASK IF MED_NOTES_MSP = YES]</b>                                                     |                        |
| <b>CLINICIAN NOTE:</b> Please do not enter any identifying information in this section. |                        |
| Please provide any notes below:                                                         |                        |

**MED\_END**

## Basic Activities of Daily Living (ADL)

*This module contains a subset of the Activities of Daily Living questions of the OARS Multidimensional Assessment Questionnaire© developed by Dr. Gerda G. Fillenbaum (Duke University Medical Center). The Canadian Longitudinal Study on Aging received permission from Dr. Fillenbaum (instrument developer) for the use of this instrument.*

|                 |                                                                                                                                                                                                                                                                                                                                                                                                                                                                                                                                                                                                                                                                                                                                                                                                                                                                                                                                                                                        |
|-----------------|----------------------------------------------------------------------------------------------------------------------------------------------------------------------------------------------------------------------------------------------------------------------------------------------------------------------------------------------------------------------------------------------------------------------------------------------------------------------------------------------------------------------------------------------------------------------------------------------------------------------------------------------------------------------------------------------------------------------------------------------------------------------------------------------------------------------------------------------------------------------------------------------------------------------------------------------------------------------------------------|
| <b>Overview</b> | <p>Activities of daily living assess respondents' ability to perform <u>basic</u> daily activities. Activities of daily living are the tasks considered vital to live independently in the community. This module contains key activities relevant to neurocognitive disorders and is a subset of the list of questions asked to the informant regarding the participant's ability to perform activities independently. The informant supplied data will in most cases be used to determine the participant's functional abilities. Exceptions would include where the informant is not able to respond to the functional questions or where the accuracy of the information they provide is judged less reliable than the information provided by the participant.</p> <p>Clinicians are expected to complete all items in this module. However, they have flexibility in determining the order in which the questions are asked and the specific wording used for each question.</p> |
|-----------------|----------------------------------------------------------------------------------------------------------------------------------------------------------------------------------------------------------------------------------------------------------------------------------------------------------------------------------------------------------------------------------------------------------------------------------------------------------------------------------------------------------------------------------------------------------------------------------------------------------------------------------------------------------------------------------------------------------------------------------------------------------------------------------------------------------------------------------------------------------------------------------------------------------------------------------------------------------------------------------------|

Now I'd like to ask you about activities of daily living. You may feel that some of these questions do not apply to you, but it is important that we ask the same questions of everyone.

|                                                                                                                 |                      |                                             |
|-----------------------------------------------------------------------------------------------------------------|----------------------|---------------------------------------------|
| <b>ADL_1</b>                                                                                                    | <b>ADL_ABLDR_MSP</b> |                                             |
| <b>[ALWAYS ASK]</b>                                                                                             |                      |                                             |
| Can you dress and undress yourself without help (including picking out clothes and putting on socks and shoes)? |                      |                                             |
| YES                                                                                                             | 1                    | Yes                                         |
| NO                                                                                                              | 2                    | No                                          |
| DK_NA                                                                                                           | 8                    | <b>[DO NOT READ]</b> Don't know / No answer |
| REFUSED                                                                                                         | 9                    | <b>[DO NOT READ]</b> Refused                |

|                                                    |                     |                                             |
|----------------------------------------------------|---------------------|---------------------------------------------|
| <b>ADL_2</b>                                       | <b>ADL_HPDR_MSP</b> |                                             |
| <b>[ASK IF ADL_ABLDR_MSP = NO]</b>                 |                     |                                             |
| Can you dress and undress yourself with some help? |                     |                                             |
| YES                                                | 1                   | Yes                                         |
| NO                                                 | 2                   | No                                          |
| DK_NA                                              | 8                   | <b>[DO NOT READ]</b> Don't know / No answer |
| REFUSED                                            | 9                   | <b>[DO NOT READ]</b> Refused                |

|                                                          |                     |                                             |
|----------------------------------------------------------|---------------------|---------------------------------------------|
| <b>ADL_3</b>                                             | <b>ADL_UNDR_MSP</b> |                                             |
| <b>[ASK IF ADL_HPDR_MSP = NO]</b>                        |                     |                                             |
| Are you completely unable to dress and undress yourself? |                     |                                             |
| YES                                                      | 1                   | Yes                                         |
| NO                                                       | 2                   | No                                          |
| DK_NA                                                    | 8                   | <b>[DO NOT READ]</b> Don't know / No answer |
| REFUSED                                                  | 9                   | <b>[DO NOT READ]</b> Refused                |

|                                             |                      |                                             |
|---------------------------------------------|----------------------|---------------------------------------------|
| <b>ADL_4</b>                                | <b>ADL_ABLBT_MSP</b> |                                             |
| <b>[ALWAYS ASK]</b>                         |                      |                                             |
| Can you take a bath or shower without help? |                      |                                             |
| YES                                         | 1                    | Yes                                         |
| NO                                          | 2                    | No                                          |
| DK_NA                                       | 8                    | <b>[DO NOT READ]</b> Don't know / No answer |
| REFUSED                                     | 9                    | <b>[DO NOT READ]</b> Refused                |

|                                                                                                                                                           |                     |                                             |
|-----------------------------------------------------------------------------------------------------------------------------------------------------------|---------------------|---------------------------------------------|
| <b>ADL_5</b>                                                                                                                                              | <b>ADL_HPBT_MSP</b> |                                             |
| <b>[ASK IF ADL_ABLBT_MSP = NO]</b>                                                                                                                        |                     |                                             |
| Can you take a bath or shower with some help (i.e., you need help from someone getting in and out of the tub or you need special attachments on the tub)? |                     |                                             |
| YES                                                                                                                                                       | 1                   | Yes                                         |
| NO                                                                                                                                                        | 2                   | No                                          |
| DK_NA                                                                                                                                                     | 8                   | <b>[DO NOT READ]</b> Don't know / No answer |
| REFUSED                                                                                                                                                   | 9                   | <b>[DO NOT READ]</b> Refused                |

|                                                                    |                     |                                             |
|--------------------------------------------------------------------|---------------------|---------------------------------------------|
| <b>ADL_6</b>                                                       | <b>ADL_UNBT_MSP</b> |                                             |
| <b>[ASK IF ADL_HPBT_MSP = NO]</b>                                  |                     |                                             |
| Are you completely unable to take a bath and a shower by yourself? |                     |                                             |
| YES                                                                | 1                   | Yes                                         |
| NO                                                                 | 2                   | No                                          |
| DK_NA                                                              | 8                   | <b>[DO NOT READ]</b> Don't know / No answer |
| REFUSED                                                            | 9                   | <b>[DO NOT READ]</b> Refused                |

|                                                           |                     |                                             |
|-----------------------------------------------------------|---------------------|---------------------------------------------|
| <b>ADL_7</b>                                              | <b>ADL_BATH_MSP</b> |                                             |
| <b>[ALWAYS ASK]</b>                                       |                     |                                             |
| Do you ever have trouble getting to the bathroom in time? |                     |                                             |
| YES                                                       | 1                   | Yes                                         |
| NO                                                        | 2                   | No                                          |
| DK_NA                                                     | 8                   | <b>[DO NOT READ]</b> Don't know / No answer |
| REFUSED                                                   | 9                   | <b>[DO NOT READ]</b> Refused                |

|                                                                               |                      |                                             |
|-------------------------------------------------------------------------------|----------------------|---------------------------------------------|
| <b>ADL_8</b>                                                                  | <b>ADL_INCNT_MSP</b> |                                             |
| <b>[ASK IF ADL_BATH_MSP = YES]</b>                                            |                      |                                             |
| How often do you wet or soil yourself (either day or night)? Would you say... |                      |                                             |
| <b>READ LIST, CODE ONLY ONE RESPONSE</b>                                      |                      |                                             |
| 0_1_TIME_WEEK                                                                 | 1                    | Never or less than once a week              |
| 1_2_TIME_WEEK                                                                 | 2                    | Once or twice a week                        |
| 3_MORE_TIMES_WEEK                                                             | 3                    | Three times a week or more                  |
| DK_NA                                                                         | 8                    | <b>[DO NOT READ]</b> Don't know / No answer |
| REFUSED                                                                       | 9                    | <b>[DO NOT READ]</b> Refused                |

|                                                              |                      |     |
|--------------------------------------------------------------|----------------------|-----|
| <b>ADL_9</b>                                                 | <b>ADL_NOTES_MSP</b> |     |
| <b>[ALWAYS ASK]</b>                                          |                      |     |
| Do you have any additional notes to include for this module? |                      |     |
| YES                                                          | 1                    | Yes |
| NO                                                           | 2                    | No  |

|                                                                                         |                         |  |
|-----------------------------------------------------------------------------------------|-------------------------|--|
| <b>ADL_10</b>                                                                           | <b>ADL_NOTES_SP_MSP</b> |  |
| <b>[ASK IF ADL_NOTES_MSP = YES]</b>                                                     |                         |  |
| <b>CLINICIAN NOTE:</b> Please do not enter any identifying information in this section. |                         |  |
| Please provide any notes below:                                                         |                         |  |

**ADL\_END**

## Instrumental Activities of Daily Living (IADL)

*This module contains a subset of the Activities of Daily Living questions of the OARS Multidimensional Assessment Questionnaire developed by Dr. Gerda G. Fillenbaum (Duke University Medical Center). The Canadian Longitudinal Study on Aging received permission from Dr. Fillenbaum (instrument developer) for the use of this instrument.*

|                 |                                                                                                                                                                                                                                                                                                                                                                                                                                                                                                                                                                                                                                                                                                                                                                                                                                                                                                                                                                       |
|-----------------|-----------------------------------------------------------------------------------------------------------------------------------------------------------------------------------------------------------------------------------------------------------------------------------------------------------------------------------------------------------------------------------------------------------------------------------------------------------------------------------------------------------------------------------------------------------------------------------------------------------------------------------------------------------------------------------------------------------------------------------------------------------------------------------------------------------------------------------------------------------------------------------------------------------------------------------------------------------------------|
| <b>Overview</b> | <p>The Instrumental Activities of Daily Living (IADL) scale assesses respondents' ability to independently perform a series of daily activities.</p> <p>This module contains key instrumental activities of daily living relevant to neurocognitive disorders and is a subset of the list of questions asked to the informant regarding the participant's ability to perform activities independently. The informant supplied data will in most cases be used to determine the participant's functional abilities. Exceptions would include where the informant is not able to respond to the functional questions or where the accuracy of the information they provide is judged less reliable than the information provided by the participant.</p> <p>Clinicians are expected to complete all items in this module. However, they have flexibility in determining the order in which the questions are asked and the specific wording used for each question.</p> |
|-----------------|-----------------------------------------------------------------------------------------------------------------------------------------------------------------------------------------------------------------------------------------------------------------------------------------------------------------------------------------------------------------------------------------------------------------------------------------------------------------------------------------------------------------------------------------------------------------------------------------------------------------------------------------------------------------------------------------------------------------------------------------------------------------------------------------------------------------------------------------------------------------------------------------------------------------------------------------------------------------------|

Now I'd like to ask you about some activities of daily living. You may feel that some of these questions do not apply to you, but it is important that we ask the same questions of everyone.

|                                                                                                         |                       |                                             |
|---------------------------------------------------------------------------------------------------------|-----------------------|---------------------------------------------|
| <b>IAL_1</b>                                                                                            | <b>IAL_ABLGRO_MSP</b> |                                             |
| <b>[ALWAYS ASK]</b>                                                                                     |                       |                                             |
| Can you go shopping for groceries or clothes without help (taking care of all shopping needs yourself)? |                       |                                             |
| YES                                                                                                     | 1                     | Yes                                         |
| NO                                                                                                      | 2                     | No                                          |
| DK_NA                                                                                                   | 8                     | <b>[DO NOT READ]</b> Don't know / No answer |
| REFUSED                                                                                                 | 9                     | <b>[DO NOT READ]</b> Refused                |

|                                                                                                                            |                      |                                             |
|----------------------------------------------------------------------------------------------------------------------------|----------------------|---------------------------------------------|
| <b>IAL_2</b>                                                                                                               | <b>IAL_HPGRO_MSP</b> |                                             |
| <b>[ASK IF IAL_ABLGRO_MSP = NO]</b>                                                                                        |                      |                                             |
| Can you go shopping for groceries or clothes with some help (i.e., you need someone to go with you on all shopping trips)? |                      |                                             |
| YES                                                                                                                        | 1                    | Yes                                         |
| NO                                                                                                                         | 2                    | No                                          |
| DK_NA                                                                                                                      | 8                    | <b>[DO NOT READ]</b> Don't know / No answer |
| REFUSED                                                                                                                    | 9                    | <b>[DO NOT READ]</b> Refused                |

|                                               |                      |                                             |
|-----------------------------------------------|----------------------|---------------------------------------------|
| <b>IAL_3</b>                                  | <b>IAL_UNGRO_MSP</b> |                                             |
| <b>[ASK IF IAL_HPGRO_MSP = NO]</b>            |                      |                                             |
| Are you completely unable to do any shopping? |                      |                                             |
| YES                                           | 1                    | Yes                                         |
| NO                                            | 2                    | No                                          |
| DK_NA                                         | 8                    | <b>[DO NOT READ]</b> Don't know / No answer |
| REFUSED                                       | 9                    | <b>[DO NOT READ]</b> Refused                |

|                                                                                            |                      |                                             |
|--------------------------------------------------------------------------------------------|----------------------|---------------------------------------------|
| <b>IAL_4</b>                                                                               | <b>IAL_ABLML_MSP</b> |                                             |
| <b>[ALWAYS ASK]</b>                                                                        |                      |                                             |
| Can you prepare your own meals without help (i.e., you plan and cook full meals yourself)? |                      |                                             |
| YES                                                                                        | 1                    | Yes                                         |
| NO                                                                                         | 2                    | No                                          |
| DK_NA                                                                                      | 8                    | <b>[DO NOT READ]</b> Don't know / No answer |
| REFUSED                                                                                    | 9                    | <b>[DO NOT READ]</b> Refused                |

|                                                                                                                               |                     |                                             |
|-------------------------------------------------------------------------------------------------------------------------------|---------------------|---------------------------------------------|
| <b>IAL_5</b>                                                                                                                  | <b>IAL_HPML_MSP</b> |                                             |
| <b>[ASK IF IAL_ABLML_MSP = NO]</b>                                                                                            |                     |                                             |
| Can you prepare your own meals with some help (i.e., you can prepare some things but are unable to cook full meals yourself)? |                     |                                             |
| YES                                                                                                                           | 1                   | Yes                                         |
| NO                                                                                                                            | 2                   | No                                          |
| DK_NA                                                                                                                         | 8                   | <b>[DO NOT READ]</b> Don't know / No answer |
| REFUSED                                                                                                                       | 9                   | <b>[DO NOT READ]</b> Refused                |

|                                                 |                     |                                             |
|-------------------------------------------------|---------------------|---------------------------------------------|
| <b>IAL_6</b>                                    | <b>IAL_UNML_MSP</b> |                                             |
| <b>[ASK IF IAL_HPML_MSP = NO]</b>               |                     |                                             |
| Are you completely unable to prepare any meals? |                     |                                             |
| YES                                             | 1                   | Yes                                         |
| NO                                              | 2                   | No                                          |
| DK_NA                                           | 8                   | <b>[DO NOT READ]</b> Don't know / No answer |
| REFUSED                                         | 9                   | <b>[DO NOT READ]</b> Refused                |

|                                                                                        |                       |                                             |
|----------------------------------------------------------------------------------------|-----------------------|---------------------------------------------|
| <b>IAL_7</b>                                                                           | <b>IAL_ABLMED_MSP</b> |                                             |
| <b>[ALWAYS ASK]</b>                                                                    |                       |                                             |
| Can you take your own medicine without help (in the right doses at the right time)?    |                       |                                             |
| <b>CLINICIAN INSTRUCTIONS: IF THE PARTICIPANT OCCASIONALLY FORGETS, CODE AS 'YES'.</b> |                       |                                             |
| YES                                                                                    | 1                     | Yes                                         |
| NO                                                                                     | 2                     | No                                          |
| DK_NA                                                                                  | 8                     | <b>[DO NOT READ]</b> Don't know / No answer |
| REFUSED                                                                                | 9                     | <b>[DO NOT READ]</b> Refused                |

|                                                                                                                                               |                      |                                             |
|-----------------------------------------------------------------------------------------------------------------------------------------------|----------------------|---------------------------------------------|
| <b>IAL_8</b>                                                                                                                                  | <b>IAL_HPMED_MSP</b> |                                             |
| <b>[ASK IF IAL_ABLMED_MSP = NO]</b>                                                                                                           |                      |                                             |
| Can you take your own medicine with some help (i.e., you are able to take medicine if someone prepares it for you or reminds you to take it)? |                      |                                             |
| YES                                                                                                                                           | 1                    | Yes                                         |
| NO                                                                                                                                            | 2                    | No                                          |
| DK_NA                                                                                                                                         | 8                    | <b>[DO NOT READ]</b> Don't know / No answer |
| REFUSED                                                                                                                                       | 9                    | <b>[DO NOT READ]</b> Refused                |

|                                                  |                      |                                             |
|--------------------------------------------------|----------------------|---------------------------------------------|
| <b>IAL_9</b>                                     | <b>IAL_UNMED_MSP</b> |                                             |
| <b>[ASK IF IAL_HPMED_MSP = NO]</b>               |                      |                                             |
| Are you completely unable to take your medicine? |                      |                                             |
| YES                                              | 1                    | Yes                                         |
| NO                                               | 2                    | No                                          |
| DK_NA                                            | 8                    | <b>[DO NOT READ]</b> Don't know / No answer |
| REFUSED                                          | 9                    | <b>[DO NOT READ]</b> Refused                |



|                                                                                        |                      |                                             |
|----------------------------------------------------------------------------------------|----------------------|---------------------------------------------|
| <b>IAL_10</b>                                                                          | <b>IAL_ABLMO_MSP</b> |                                             |
| <b>[ALWAYS ASK]</b>                                                                    |                      |                                             |
| Can you handle your own money without help (i.e., you write cheques, pay bills, etc.)? |                      |                                             |
| <b>CLINICIAN INSTRUCTIONS: IF THE PARTICIPANT OCCASIONALLY FORGETS, CODE AS 'YES'.</b> |                      |                                             |
| YES                                                                                    | 1                    | Yes                                         |
| NO                                                                                     | 2                    | No                                          |
| DK_NA                                                                                  | 8                    | <b>[DO NOT READ]</b> Don't know / No answer |
| REFUSED                                                                                | 9                    | <b>[DO NOT READ]</b> Refused                |

|                                                                                                                                                     |                     |                                             |
|-----------------------------------------------------------------------------------------------------------------------------------------------------|---------------------|---------------------------------------------|
| <b>IAL_11</b>                                                                                                                                       | <b>IAL_HPMO_MSP</b> |                                             |
| <b>[ASK IF IAL_ABLMO_MSP = NO]</b>                                                                                                                  |                     |                                             |
| Can you handle your own money with some help (i.e., you manage day-to-day buying but need help with managing your chequebook or paying your bills)? |                     |                                             |
| YES                                                                                                                                                 | 1                   | Yes                                         |
| NO                                                                                                                                                  | 2                   | No                                          |
| DK_NA                                                                                                                                               | 8                   | <b>[DO NOT READ]</b> Don't know / No answer |
| REFUSED                                                                                                                                             | 9                   | <b>[DO NOT READ]</b> Refused                |

|                                                 |                     |                                             |
|-------------------------------------------------|---------------------|---------------------------------------------|
| <b>IAL_12</b>                                   | <b>IAL_UNMO_MSP</b> |                                             |
| <b>[ASK IF IAL_HPMO_MSP = NO]</b>               |                     |                                             |
| Are you completely unable to handle your money? |                     |                                             |
| YES                                             | 1                   | Yes                                         |
| NO                                              | 2                   | No                                          |
| DK_NA                                           | 8                   | <b>[DO NOT READ]</b> Don't know / No answer |
| REFUSED                                         | 9                   | <b>[DO NOT READ]</b> Refused                |

|                                                                                         |                      |                                             |
|-----------------------------------------------------------------------------------------|----------------------|---------------------------------------------|
| <b>IAL_13</b>                                                                           | <b>IAL_FUNCT_MSP</b> |                                             |
| <b>[ALWAYS ASK]</b>                                                                     |                      |                                             |
| Have you experienced any changes in your functional abilities due to cognitive changes? |                      |                                             |
| YES                                                                                     | 1                    | Yes                                         |
| NO                                                                                      | 2                    | No                                          |
| DK_NA                                                                                   | 8                    | <b>[DO NOT READ]</b> Don't know / No answer |
| REFUSED                                                                                 | 9                    | <b>[DO NOT READ]</b> Refused                |

|                                                              |                      |     |
|--------------------------------------------------------------|----------------------|-----|
| <b>IAL_14</b>                                                | <b>IAL_NOTES_MSP</b> |     |
| <b>[ALWAYS ASK]</b>                                          |                      |     |
| Do you have any additional notes to include for this module? |                      |     |
| YES                                                          | 1                    | Yes |
| NO                                                           | 2                    | No  |

|                                                                                         |                         |  |
|-----------------------------------------------------------------------------------------|-------------------------|--|
| <b>IAL_15</b>                                                                           | <b>IAL_NOTES_SP_MSP</b> |  |
| <b>[ASK IF IAL_NOTES_MSP = YES]</b>                                                     |                         |  |
| <b>CLINICIAN NOTE:</b> Please do not enter any identifying information in this section. |                         |  |
| Please provide any notes below:                                                         |                         |  |

**IAL\_END**

## Transportation (TRA)

|                 |                                                                                                                                                                                                                                                                                                                                                                                                                                                                                                                                                                                                                                                                                                                                                                       |
|-----------------|-----------------------------------------------------------------------------------------------------------------------------------------------------------------------------------------------------------------------------------------------------------------------------------------------------------------------------------------------------------------------------------------------------------------------------------------------------------------------------------------------------------------------------------------------------------------------------------------------------------------------------------------------------------------------------------------------------------------------------------------------------------------------|
| <b>Overview</b> | <p>The questions in this module ask participants about their driving status, and details regarding their license status.</p> <p>The informant is also being asked questions about the participant's driving. The informant supplied data will in most cases be used to determine the participant's driving status. Exceptions would include where the informant is not able to respond to the functional questions or where the accuracy of the information they provide is judged less reliable than the information provided by the participant.</p> <p>Clinicians are expected to complete all items in this module. However, they have flexibility in determining the order in which the questions are asked and the specific wording used for each question.</p> |
|-----------------|-----------------------------------------------------------------------------------------------------------------------------------------------------------------------------------------------------------------------------------------------------------------------------------------------------------------------------------------------------------------------------------------------------------------------------------------------------------------------------------------------------------------------------------------------------------------------------------------------------------------------------------------------------------------------------------------------------------------------------------------------------------------------|

|                                                                                                                 |                        |                                                                                                                                                      |
|-----------------------------------------------------------------------------------------------------------------|------------------------|------------------------------------------------------------------------------------------------------------------------------------------------------|
| <b>TRA_1</b>                                                                                                    | <b>TRA_DSTATUS_MSP</b> |                                                                                                                                                      |
| <b>[ALWAYS ASK]</b>                                                                                             |                        |                                                                                                                                                      |
| Which of the following describes the participant's driving status? (Include cars, vans, trucks and motorcycles) |                        |                                                                                                                                                      |
| <b>READ LIST, CODE ONLY ONE RESPONSE</b>                                                                        |                        |                                                                                                                                                      |
| NEVER                                                                                                           | 1                      | Never had a driver's license                                                                                                                         |
| FORMER                                                                                                          | 2                      | Had a driver's license at one point in his or her life, but currently do not have it                                                                 |
| CURRENT                                                                                                         | 3                      | Have a driver's license without restrictions (except corrective lenses )                                                                             |
| RESTRICTED                                                                                                      | 4                      | Have a driver's license with restrictions on time of driving (daylight only), distance from home, type of road (no highway), or number of passengers |
| DK_NA                                                                                                           | 8                      | <b>[DO NOT READ]</b> Don't know / No answer                                                                                                          |
| REFUSED                                                                                                         | 9                      | <b>[DO NOT READ]</b> Refused                                                                                                                         |

|                                       |                     |                                             |
|---------------------------------------|---------------------|---------------------------------------------|
| <b>TRA_2</b>                          | <b>TRA_STOP_MSP</b> |                                             |
| <b>[ASK IF TRA_STA_MSP = FORMER]</b>  |                     |                                             |
| Why did the participant stop driving? |                     |                                             |
| <b>CODE ONLY ONE RESPONSE</b>         |                     |                                             |
| VOL_STOP                              | 1                   | Voluntarily stopped driving                 |
| LICS_RESC                             | 2                   | License rescinded                           |
| OT_SP                                 | 3                   | Other (please specify: _____)               |
| DK_NA                                 | 8                   | <b>[DO NOT READ]</b> Don't know / No answer |
| REFUSED                               | 9                   | <b>[DO NOT READ]</b> Refused                |

|                                                               |                       |                                                          |
|---------------------------------------------------------------|-----------------------|----------------------------------------------------------|
| <b>TRA_3</b>                                                  | <b>TRA_STOPYR_MSP</b> |                                                          |
| <b>[ASK IF TRA_STA_MSP = FORMER]</b>                          |                       |                                                          |
| At what age or in what year did the participant stop driving? |                       |                                                          |
| YR_SP                                                         | Year                  | _____ <b>[MASK: MIN=YEAR OF BIRTH, MAX=CURRENT YEAR]</b> |
| NB_SP                                                         | Age                   | _____ <b>[MASK:MIN=00, MAX=CURRENT AGE]</b>              |
| DK_NA                                                         | 9998                  | <b>[DO NOT READ]</b> Don't know / No answer              |
| REFUSED                                                       | 9999                  | <b>[DO NOT READ]</b> Refused                             |

|                                                              |                      |     |
|--------------------------------------------------------------|----------------------|-----|
| <b>TRA_4</b>                                                 | <b>TRA_NOTES_MSP</b> |     |
| <b>[ALWAYS ASK]</b>                                          |                      |     |
| Do you have any additional notes to include for this module? |                      |     |
| YES                                                          | 1                    | Yes |
| NO                                                           | 2                    | No  |

|                                                                                         |                         |  |
|-----------------------------------------------------------------------------------------|-------------------------|--|
| <b>TRA_5</b>                                                                            | <b>TRA_NOTES_SP_MSP</b> |  |
| <b>[ASK IF TRA_NOTES_MSP = YES]</b>                                                     |                         |  |
| <b>CLINICIAN NOTE:</b> Please do not enter any identifying information in this section. |                         |  |
| Please provide any notes below:                                                         |                         |  |

**TRA\_END**

## Mood and Behaviour (BHV)

The first two questions of this module are from the Patient Health Questionnaire-2 (PHQ-2). It is publicly available and no permission is required to use, reproduce, or distribute the tools.

Kroenke K, Spitzer RL, Williams JB. The Patient Health Questionnaire-2: Validity of a Two-Item Depression Screener. *Medical Care*. 2003;41:1284-92. The other questions in this module capture information on mood and behaviour relevant to the diagnosis of neurocognitive disorder.

|                 |                                                                                                                                                                                                                                                                                                                                                                           |
|-----------------|---------------------------------------------------------------------------------------------------------------------------------------------------------------------------------------------------------------------------------------------------------------------------------------------------------------------------------------------------------------------------|
| <b>Overview</b> | <p>The questions in this module ask participants about their mood and behaviour.</p> <p>Clinicians are expected to complete all items in this module. However, with the exception of the first two questions (BHV_DEP1 and BHV_DEP2) they have flexibility in determining the order in which the questions are asked and the specific wording used for each question.</p> |
|-----------------|---------------------------------------------------------------------------------------------------------------------------------------------------------------------------------------------------------------------------------------------------------------------------------------------------------------------------------------------------------------------------|

**Physician Note: Please read the first two questions verbatim.**

Over the past 2 weeks, how often have you been bothered by any of the following problems...?

|                                              |                     |                                             |
|----------------------------------------------|---------------------|---------------------------------------------|
| <b>BHV_1</b>                                 | <b>BHV_DEP1_MSP</b> |                                             |
| <b>[ALWAYS ASK]</b>                          |                     |                                             |
| Little interest or pleasure in doing things? |                     |                                             |
| <b>READ LIST, CODE ONLY ONE RESPONSE</b>     |                     |                                             |
| NO                                           | 1                   | Not at all                                  |
| SEVERAL                                      | 2                   | Several days                                |
| HALF                                         | 3                   | More than half the days                     |
| EVERY                                        | 4                   | Almost every day                            |
| DK_NA                                        | 8                   | <b>[DO NOT READ]</b> Don't know / No answer |
| REFUSED                                      | 9                   | <b>[DO NOT READ]</b> Refused                |

|                                          |                     |                                             |
|------------------------------------------|---------------------|---------------------------------------------|
| <b>BHV_2</b>                             | <b>BHV_DEP2_MSP</b> |                                             |
| <b>[ALWAYS ASK]</b>                      |                     |                                             |
| Feeling down, depressed or hopeless?     |                     |                                             |
| <b>READ LIST, CODE ONLY ONE RESPONSE</b> |                     |                                             |
| NO                                       | 1                   | Not at all                                  |
| SEVERAL                                  | 2                   | Several days                                |
| HALF                                     | 3                   | More than half the days                     |
| EVERY                                    | 4                   | Almost every day                            |
| DK_NA                                    | 8                   | <b>[DO NOT READ]</b> Don't know / No answer |
| REFUSED                                  | 9                   | <b>[DO NOT READ]</b> Refused                |

|                                                                                                                                                     |                     |                                             |
|-----------------------------------------------------------------------------------------------------------------------------------------------------|---------------------|---------------------------------------------|
| <b>BHV_3</b>                                                                                                                                        | <b>BHV_PERS_MSP</b> |                                             |
| <b>[ALWAYS ASK]</b>                                                                                                                                 |                     |                                             |
| Has the participant noted any persistent adverse changes in their personality (such as apathy, irritability, or lability) lasting a year or longer? |                     |                                             |
| YES                                                                                                                                                 | 1                   | Yes                                         |
| NO                                                                                                                                                  | 2                   | No                                          |
| DK_NA                                                                                                                                               | 8                   | <b>[DO NOT READ]</b> Don't know / No answer |
| REFUSED                                                                                                                                             | 9                   | <b>[DO NOT READ]</b> Refused                |

|                                                    |                    |                                             |
|----------------------------------------------------|--------------------|---------------------------------------------|
| <b>BHV_4</b>                                       | <b>BHV_ANX_MSP</b> |                                             |
| <b>[ALWAYS ASK]</b>                                |                    |                                             |
| Is the participant currently experiencing anxiety? |                    |                                             |
| YES                                                | 1                  | Yes                                         |
| NO                                                 | 2                  | No                                          |
| DK_NA                                              | 8                  | <b>[DO NOT READ]</b> Don't know / No answer |
| REFUSED                                            | 9                  | <b>[DO NOT READ]</b> Refused                |

|                                                                       |                    |                                             |
|-----------------------------------------------------------------------|--------------------|---------------------------------------------|
| <b>BHV_5</b>                                                          | <b>BHV_SUS_MSP</b> |                                             |
| <b>[ALWAYS ASK]</b>                                                   |                    |                                             |
| Is the participant currently experiencing feelings of suspiciousness? |                    |                                             |
| YES                                                                   | 1                  | Yes                                         |
| NO                                                                    | 2                  | No                                          |
| DK_NA                                                                 | 8                  | <b>[DO NOT READ]</b> Don't know / No answer |
| REFUSED                                                               | 9                  | <b>[DO NOT READ]</b> Refused                |

|                                                                                                 |                    |     |
|-------------------------------------------------------------------------------------------------|--------------------|-----|
| <b>BHV_6</b>                                                                                    | <b>BHV_PSY_MSP</b> |     |
| <b>[ALWAYS ASK]</b>                                                                             |                    |     |
| Is the participant currently experiencing psychotic symptoms (delusions and/or hallucinations)? |                    |     |
| YES                                                                                             | 1                  | Yes |

|         |   |                                             |
|---------|---|---------------------------------------------|
| NO      | 2 | No                                          |
| DK_NA   | 8 | <b>[DO NOT READ]</b> Don't know / No answer |
| REFUSED | 9 | <b>[DO NOT READ]</b> Refused                |

|                                                              |                      |     |
|--------------------------------------------------------------|----------------------|-----|
| <b>BHV_7</b>                                                 | <b>BHV_NOTES_MSP</b> |     |
| <b>[ALWAYS ASK]</b>                                          |                      |     |
| Do you have any additional notes to include for this module? |                      |     |
| YES                                                          | 1                    | Yes |
| NO                                                           | 2                    | No  |

|                                                                                                                                                                                                                   |                         |  |
|-------------------------------------------------------------------------------------------------------------------------------------------------------------------------------------------------------------------|-------------------------|--|
| <b>BHV_8</b>                                                                                                                                                                                                      | <b>BHV_NOTES_SP_MSP</b> |  |
| <b>[ASK IF BHV_NOTES_MSP = YES]</b>                                                                                                                                                                               |                         |  |
| <b>CLINICIAN NOTE:</b> Please do not enter any identifying information in this section.                                                                                                                           |                         |  |
| Please provide any notes below. For example, are there any other details regarding the participant's mood and behaviour that should be taken into account when interpreting the results of the cognitive testing? |                         |  |

**BHV\_END**

## Physical Examination (EXM)

|                 |                                                                                                                                                                |
|-----------------|----------------------------------------------------------------------------------------------------------------------------------------------------------------|
| <b>Overview</b> | Clinicians are expected to complete all items in this module. However, they have flexibility in determining the order in which the physical exam is completed. |
|-----------------|----------------------------------------------------------------------------------------------------------------------------------------------------------------|

|                                                                                |                      |          |
|--------------------------------------------------------------------------------|----------------------|----------|
| <b>EXM_1</b>                                                                   | <b>EXM_ALERT_MSP</b> |          |
| <b>[ALWAYS ASK]</b>                                                            |                      |          |
| Is the alertness/level of consciousness of the participant normal or abnormal? |                      |          |
| <b>CODE ONLY ONE RESPONSE</b>                                                  |                      |          |
| NRM                                                                            | 1                    | Normal   |
| ABNRM                                                                          | 2                    | Abnormal |
| UNSURE                                                                         | 7                    | Unsure   |

|                                                          |                     |     |
|----------------------------------------------------------|---------------------|-----|
| <b>EXM_2</b>                                             | <b>EXM_HEAR_MSP</b> |     |
| <b>[ALWAYS ASK]</b>                                      |                     |     |
| Is the participant willing to complete the hearing test? |                     |     |
| YES                                                      | 1                   | Yes |
| NO                                                       | 2                   | No  |

To evaluate hearing, please follow these instructions:

1. Position yourself approximately 60cm from the participant's ear
2. Mask the ear not being tested by rubbing the tragus. Do not place your arm across the face of the participant when rubbing the tragus, it is far nicer to occlude the ear from behind the head. If possible shield the participant's eyes to prevent any visual stimulus.
3. Whisper a number or word.
4. Ask the participant to repeat the number or word back to you. If they get two-thirds or more correct then their hearing level is 12db or better. If there is no response use a conversational voice (48db or louder) or loud voice (76db or louder).
5. If there is no response you can move closer and repeat the test at 15cm. Here the thresholds are 34db for a whisper and 56db for a conversational voice.
6. Assess the other ear in the same way.
7. Modifications may have to be made if personal protective equipment is worn.

|              |                            |
|--------------|----------------------------|
| <b>EXM_3</b> | <b>EXM_HEARRIGHT12_MSP</b> |
|--------------|----------------------------|



|                                                                                                                              |   |                  |
|------------------------------------------------------------------------------------------------------------------------------|---|------------------|
| <b>[ASK IF EXM_HEAR_MSP = YES]</b>                                                                                           |   |                  |
| Was the participant able to correctly repeat back the word or number you whispered at a distance of 60cm in their right ear? |   |                  |
| <b>CODE ONLY ONE RESPONSE</b>                                                                                                |   |                  |
| YES                                                                                                                          | 1 | Yes              |
| NO                                                                                                                           | 2 | No               |
| NOTDONE                                                                                                                      | 8 | Unable to assess |

|                                                                                                                                                         |                            |                  |
|---------------------------------------------------------------------------------------------------------------------------------------------------------|----------------------------|------------------|
| <b>EXM_4</b>                                                                                                                                            | <b>EXM_HEARRIGHT48_MSP</b> |                  |
| <b>[ASK IF EXM_HEARRIGHT12_MSP = NO]</b>                                                                                                                |                            |                  |
| Was the participant able to correctly repeat back the word or number you spoke using a conversational volume at a distance of 60cm in their right ear?? |                            |                  |
| <b>CODE ONLY ONE RESPONSE</b>                                                                                                                           |                            |                  |
| YES                                                                                                                                                     | 1                          | Yes              |
| NO                                                                                                                                                      | 2                          | No               |
| NOTDONE                                                                                                                                                 | 8                          | Unable to assess |

|                                                                                                                                              |                            |                  |
|----------------------------------------------------------------------------------------------------------------------------------------------|----------------------------|------------------|
| <b>EXM_5</b>                                                                                                                                 | <b>EXM_HEARRIGHT76_MSP</b> |                  |
| <b>[ASK IF EXM_HEARRIGHT48_MSP = NO]</b>                                                                                                     |                            |                  |
| Was the participant able to correctly repeat back the word or number you spoke using a loud voice at a distance of 60cm in their right ear?? |                            |                  |
| <b>CODE ONLY ONE RESPONSE</b>                                                                                                                |                            |                  |
| YES                                                                                                                                          | 1                          | Yes              |
| NO                                                                                                                                           | 2                          | No               |
| NOTDONE                                                                                                                                      | 8                          | Unable to assess |

|                                          |                            |  |
|------------------------------------------|----------------------------|--|
| <b>EXM_6</b>                             | <b>EXM_HEARRIGHT34_MSP</b> |  |
| <b>[ASK IF EXM_HEARRIGHT76_MSP = NO]</b> |                            |  |

|                                                                                                                               |   |                  |
|-------------------------------------------------------------------------------------------------------------------------------|---|------------------|
| Was the participant able to correctly repeat back the word or number you whispered at a distance of 15cm in their right ear?? |   |                  |
| <b>CODE ONLY ONE RESPONSE</b>                                                                                                 |   |                  |
| YES                                                                                                                           | 1 | Yes              |
| NO                                                                                                                            | 2 | No               |
| NOTDONE                                                                                                                       | 8 | Unable to assess |

|                                                                                                                                                         |                            |                  |
|---------------------------------------------------------------------------------------------------------------------------------------------------------|----------------------------|------------------|
| <b>EXM_7</b>                                                                                                                                            | <b>EXM_HEARRIGHT56_MSP</b> |                  |
| <b>[ASK IF EXM_HEARRIGHT34_MSP = NO]</b>                                                                                                                |                            |                  |
| Was the participant able to correctly repeat back the word or number you spoke using a conversational volume at a distance of 15cm in their right ear?? |                            |                  |
| <b>CODE ONLY ONE RESPONSE</b>                                                                                                                           |                            |                  |
| YES                                                                                                                                                     | 1                          | Yes              |
| NO                                                                                                                                                      | 2                          | No               |
| NOTDONE                                                                                                                                                 | 8                          | Unable to assess |

|                                                                                                                              |                           |                  |
|------------------------------------------------------------------------------------------------------------------------------|---------------------------|------------------|
| <b>EXM_8</b>                                                                                                                 | <b>EXM_HEARLEFT12_MSP</b> |                  |
| <b>[ASK IF EXM_HEAR_MSP = YES]</b>                                                                                           |                           |                  |
| Was the participant able to correctly repeat back the word or number you whispered at a distance of 60cm in their left ear?? |                           |                  |
| <b>CODE ONLY ONE RESPONSE</b>                                                                                                |                           |                  |
| YES                                                                                                                          | 1                         | Yes              |
| NO                                                                                                                           | 2                         | No               |
| NOTDONE                                                                                                                      | 8                         | Unable to assess |

|                                         |                           |  |
|-----------------------------------------|---------------------------|--|
| <b>EXM_9</b>                            | <b>EXM_HEARLEFT48_MSP</b> |  |
| <b>[ASK IF EXM_HEARLEFT12_MSP = NO]</b> |                           |  |

|                                                                                                                                                        |   |                  |
|--------------------------------------------------------------------------------------------------------------------------------------------------------|---|------------------|
| Was the participant able to correctly repeat back the word or number you spoke using a conversational volume at a distance of 60cm in their left ear?? |   |                  |
| <b>CODE ONLY ONE RESPONSE</b>                                                                                                                          |   |                  |
| YES                                                                                                                                                    | 1 | Yes              |
| NO                                                                                                                                                     | 2 | No               |
| NOTDONE                                                                                                                                                | 8 | Unable to assess |

|                                                                                                                                             |                           |                  |
|---------------------------------------------------------------------------------------------------------------------------------------------|---------------------------|------------------|
| <b>EXM_10</b>                                                                                                                               | <b>EXM_HEARLEFT76_MSP</b> |                  |
| <b>[ASK IF EXM_HEARLEFT48_MSP = NO]</b>                                                                                                     |                           |                  |
| Was the participant able to correctly repeat back the word or number you spoke using a loud voice at a distance of 60cm in their left ear?? |                           |                  |
| <b>CODE ONLY ONE RESPONSE</b>                                                                                                               |                           |                  |
| YES                                                                                                                                         | 1                         | Yes              |
| NO                                                                                                                                          | 2                         | No               |
| NOTDONE                                                                                                                                     | 8                         | Unable to assess |

|                                                                                                                         |                           |                  |
|-------------------------------------------------------------------------------------------------------------------------|---------------------------|------------------|
| <b>EXM_11</b>                                                                                                           | <b>EXM_HEARLEFT34_MSP</b> |                  |
| <b>[ASK IF EXM_HEARLEFT76_MSP = NO]</b>                                                                                 |                           |                  |
| Was the participant able to correctly repeat the word or number you whispered at a distance of 15cm in their left ear?? |                           |                  |
| <b>CODE ONLY ONE RESPONSE</b>                                                                                           |                           |                  |
| YES                                                                                                                     | 1                         | Yes              |
| NO                                                                                                                      | 2                         | No               |
| NOTDONE                                                                                                                 | 8                         | Unable to assess |

|                                         |                           |  |
|-----------------------------------------|---------------------------|--|
| <b>EXM_12</b>                           | <b>EXM_HEARLEFT56_MSP</b> |  |
| <b>[ASK IF EXM_HEARLEFT34_MSP = NO]</b> |                           |  |

|                                                                                                                                                        |   |                  |
|--------------------------------------------------------------------------------------------------------------------------------------------------------|---|------------------|
| Was the participant able to correctly repeat back the word or number you spoke using a conversational volume at a distance of 15cm in their left ear?? |   |                  |
| <b>CODE ONLY ONE RESPONSE</b>                                                                                                                          |   |                  |
| YES                                                                                                                                                    | 1 | Yes              |
| NO                                                                                                                                                     | 2 | No               |
| NOTDONE                                                                                                                                                | 8 | Unable to assess |

|                                                                                  |                           |     |
|----------------------------------------------------------------------------------|---------------------------|-----|
| <b>EXM_13</b>                                                                    | <b>EXAM_HEARNOTES_MSP</b> |     |
| <b>[ALWAYS ASK]</b>                                                              |                           |     |
| Do you have any additional notes to include regarding the participant's hearing? |                           |     |
| YES                                                                              | 1                         | Yes |
| NO                                                                               | 2                         | No  |

|                                                                                         |                              |  |
|-----------------------------------------------------------------------------------------|------------------------------|--|
| <b>EXM_14</b>                                                                           | <b>EXAM_HEARNOTES_SP_MSP</b> |  |
| <b>[ASK IF EXAM_HEAR_NOTES_MSP = YES]</b>                                               |                              |  |
| <b>CLINICIAN NOTE:</b> Please do not enter any identifying information in this section. |                              |  |
| Please provide any notes below:                                                         |                              |  |

|                                                         |                      |          |
|---------------------------------------------------------|----------------------|----------|
| <b>EXM_15</b>                                           | <b>EXM_SMELL_MSP</b> |          |
| <b>[ALWAYS ASK]</b>                                     |                      |          |
| Is the participant's sense of smell normal or abnormal? |                      |          |
| <b>CODE ONLY ONE RESPONSE</b>                           |                      |          |
| NRM                                                     | 1                    | Normal   |
| ABNRM                                                   | 2                    | Abnormal |
| UNSURE                                                  | 7                    | Unsure   |

|                                                                 |                      |  |
|-----------------------------------------------------------------|----------------------|--|
| <b>EXM_16</b>                                                   | <b>EXM_FOCAL_MSP</b> |  |
| <b>[ALWAYS ASK]</b>                                             |                      |  |
| Are there any focal/lateralizing neurological findings to note? |                      |  |

| <b>MULTIPLE RESPONSES ALLOWED, CODE ALL THAT APPLY (EXCEPT IF 96 IS SELECTED)</b> |    |                                 |
|-----------------------------------------------------------------------------------|----|---------------------------------|
| VIS                                                                               | 01 | Visual field defect             |
| EXT                                                                               | 02 | Abnormal extra-ocular movements |
| RGD                                                                               | 03 | Rigidity                        |
| WKN                                                                               | 04 | Weakness                        |
| SP                                                                                | 05 | Speech                          |
| NONE                                                                              | 96 | None                            |
| OTSP                                                                              | 97 | Other: Please specify:          |

|                                          |                            |
|------------------------------------------|----------------------------|
| <b>EXM_17</b>                            | <b>EXM_FOCALVIS_SP_MSP</b> |
| <b>[ASK IF EXAM_FOCAL_MSP = VIS]</b>     |                            |
| Please describe the visual field defect: |                            |
| Open text: _____                         |                            |

|                                                      |                            |
|------------------------------------------------------|----------------------------|
| <b>EXM_18</b>                                        | <b>EXM_FOCALEXT_SP_MSP</b> |
| <b>[ASK IF EXAM_FOCAL_MSP = EXT]</b>                 |                            |
| Please describe the abnormal extra-ocular movements: |                            |
| Open text: _____                                     |                            |

|                                                           |                            |
|-----------------------------------------------------------|----------------------------|
| <b>EXM_19</b>                                             | <b>EXM_FOCALRGD_SP_MSP</b> |
| <b>[ASK IF EXAM_FOCAL_MSP = RGD]</b>                      |                            |
| Please describe the rigidity observed in the participant: |                            |
| Open text: _____                                          |                            |

|                                                           |                            |
|-----------------------------------------------------------|----------------------------|
| <b>EXM_20</b>                                             | <b>EXM_FOCALWKN_SP_MSP</b> |
| <b>[ASK IF EXAM_FOCAL_MSP = WKN]</b>                      |                            |
| Please describe the weakness observed in the participant: |                            |

Open text: \_\_\_\_\_

|                                                                       |                           |
|-----------------------------------------------------------------------|---------------------------|
| <b>EXM_21</b>                                                         | <b>EXM_FOCALSP_SP_MSP</b> |
| <b>[ASK IF EXAM_FOCAL_MSP = SP]</b>                                   |                           |
| Please describe the speech abnormalities observed in the participant: |                           |
| Open text: _____                                                      |                           |

|                                                                      |                             |
|----------------------------------------------------------------------|-----------------------------|
| <b>EXM_22</b>                                                        | <b>EXM_FOCALOTSP_SP_MSP</b> |
| <b>[ASK IF EXAM_FOCAL_MSP = OTSP]</b>                                |                             |
| Please describe any other abnormalities observed in the participant: |                             |
| Open text: _____                                                     |                             |

|                                                                                   |                      |                |
|-----------------------------------------------------------------------------------|----------------------|----------------|
| <b>EXM_23</b>                                                                     | <b>EXM_EXPYR_MSP</b> |                |
| <b>[ALWAYS ASK]</b>                                                               |                      |                |
| Are there any extrapyramidal signs observed?                                      |                      |                |
| <b>MULTIPLE RESPONSES ALLOWED (EXCEPT IF 96 IS SELECTED), CODE ALL THAT APPLY</b> |                      |                |
| TRM                                                                               | 01                   | Tremor         |
| RGD                                                                               | 02                   | Rigidity       |
| BKN                                                                               | 03                   | Bradykinesia   |
| PST                                                                               | 04                   | Posture        |
| NONE                                                                              | 96                   | None           |
| OTSP                                                                              | 97                   | Other: specify |

|                                                       |                           |
|-------------------------------------------------------|---------------------------|
| <b>EXM_24</b>                                         | <b>EXM_EXPYRNOTES_MSP</b> |
| <b>[ASK IF EXM_EXPYR_MSP = TRM, RGD, BKN, or PST]</b> |                           |
| Please describe the extrapyramidal signs if required. |                           |

|                  |   |                                             |
|------------------|---|---------------------------------------------|
| Open text: _____ |   |                                             |
| DK_NA            | 8 | <b>[DO NOT READ]</b> Don't know / No answer |

|                                                                                 |                       |          |
|---------------------------------------------------------------------------------|-----------------------|----------|
| <b>EXM_25</b>                                                                   | <b>EXM_TRANSF_MSP</b> |          |
| <b>[ALWAYS ASK]</b>                                                             |                       |          |
| How would you evaluate the participant's ability to do a sit to stand transfer? |                       |          |
| <b>CODE ONLY ONE RESPONSE</b>                                                   |                       |          |
| NRM                                                                             | 1                     | Normal   |
| ABNRM                                                                           | 2                     | Abnormal |
| UNSURE                                                                          | 7                     | Unsure   |

|                                                                                                                                                                                                                                                                                                                                                                                                                                                                                                                                                                                                 |                        |                  |
|-------------------------------------------------------------------------------------------------------------------------------------------------------------------------------------------------------------------------------------------------------------------------------------------------------------------------------------------------------------------------------------------------------------------------------------------------------------------------------------------------------------------------------------------------------------------------------------------------|------------------------|------------------|
| <b>EXM_26</b>                                                                                                                                                                                                                                                                                                                                                                                                                                                                                                                                                                                   | <b>EXM_BALANCE_MSP</b> |                  |
| <b>[ALWAYS ASK]</b>                                                                                                                                                                                                                                                                                                                                                                                                                                                                                                                                                                             |                        |                  |
| How would you evaluate the participant's stability using the Romberg test?                                                                                                                                                                                                                                                                                                                                                                                                                                                                                                                      |                        |                  |
| <b>CLINICIAN NOTES:</b> The Romberg test requires that the participant removes their shoes. Participants will be asked to stand with their feet together on a flat, hard surface. The participant will be asked to cross their arms in front of their body or place them at their sides. The participant will be asked to stand still and keep their eyes open for approximately 30 seconds while the examining clinician observes. The participant will then be asked to close their eyes and stand for an addition 30 seconds. The examining clinician will assess body movement and balance. |                        |                  |
| <b>CODE ONLY ONE RESPONSE</b>                                                                                                                                                                                                                                                                                                                                                                                                                                                                                                                                                                   |                        |                  |
| NRM                                                                                                                                                                                                                                                                                                                                                                                                                                                                                                                                                                                             | 1                      | Normal           |
| ABNRM                                                                                                                                                                                                                                                                                                                                                                                                                                                                                                                                                                                           | 2                      | Abnormal         |
| NOTDONE                                                                                                                                                                                                                                                                                                                                                                                                                                                                                                                                                                                         | 8                      | Unable to assess |

|                                                      |                        |  |
|------------------------------------------------------|------------------------|--|
| <b>EXM_27</b>                                        | <b>EXM_GAITSPD_MSP</b> |  |
| <b>[ALWAYS ASK]</b>                                  |                        |  |
| Does the participant have normal or slow gait speed? |                        |  |

|                                                                                                                       |   |                  |
|-----------------------------------------------------------------------------------------------------------------------|---|------------------|
| <b>CLINICIAN NOTES:</b> Gait speed may be evaluated by watching the participant move around the Data Collection Site. |   |                  |
| <b>CODE ONLY ONE RESPONSE</b>                                                                                         |   |                  |
| NRM                                                                                                                   | 1 | Normal           |
| SLOW                                                                                                                  | 2 | Slow             |
| NOTDONE                                                                                                               | 8 | Unable to assess |

|                                                                                  |                     |                                                                  |
|----------------------------------------------------------------------------------|---------------------|------------------------------------------------------------------|
| <b>EXM_28</b>                                                                    | <b>EXM_GAIT_MSP</b> |                                                                  |
| <b>[ALWAYS ASK]</b>                                                              |                     |                                                                  |
| Did you observe any gait abnormalities?                                          |                     |                                                                  |
| <b>MULTIPLE RESPONSES ALLOWED (EXCEPT IF 96 ISSELECTED), CODE ALL THAT APPLY</b> |                     |                                                                  |
| NO                                                                               | 01                  | No gait abnormalities                                            |
| NN                                                                               | 02                  | Abnormal gait speed due to non-neurologic cause (e.g. arthritis) |
| ST                                                                               | 03                  | Unsteady                                                         |
| FR                                                                               | 04                  | Frontal                                                          |
| HM                                                                               | 05                  | Hemiparetic                                                      |
| NR                                                                               | 06                  | Neuropathic                                                      |
| AT                                                                               | 07                  | Ataxic                                                           |
| PK                                                                               | 08                  | Parkinsonian                                                     |
| SP                                                                               | 09                  | Spastic                                                          |
| NOTDONE                                                                          | 96                  | Unable to assess                                                 |

|                                                                                                                                                   |                             |  |
|---------------------------------------------------------------------------------------------------------------------------------------------------|-----------------------------|--|
| <b>EXM_29</b>                                                                                                                                     | <b>EXM_BALGAITNOTES_MSP</b> |  |
| <b>[ASK IF EXM_TRANSF_MSP = ABNRM, OR EXM_BALANCE_MSP = ABNRM, OR EXM_GAITSPD_MSP = SLOW, OR EXM_GAITMSP = NN, ST, FR, HM, NR, AT, PK, or SP]</b> |                             |  |
| Please describe any abnormalities in transferring, balance, or gait.                                                                              |                             |  |
|                                                                                                                                                   |                             |  |

|                                                                                                                                                                                                                                |                      |     |
|--------------------------------------------------------------------------------------------------------------------------------------------------------------------------------------------------------------------------------|----------------------|-----|
| <b>EXM_30</b>                                                                                                                                                                                                                  | <b>EXM_NOTES_MSP</b> |     |
| <b>[ALWAYS ASK]</b>                                                                                                                                                                                                            |                      |     |
| Do you have any additional notes to include for this module? For example, are there any other findings from the physical examination that should be taken into account when interpreting the results of the cognitive testing? |                      |     |
| YES                                                                                                                                                                                                                            | 1                    | Yes |



|    |   |    |
|----|---|----|
| NO | 2 | No |
|----|---|----|

|                                                                                         |                         |
|-----------------------------------------------------------------------------------------|-------------------------|
| <b>EXM_31</b>                                                                           | <b>EXM_NOTES_SP_MSP</b> |
| <b>[ASK IF EXM_NOTES_MSP = YES]</b>                                                     |                         |
| <b>CLINICIAN NOTE:</b> Please do not enter any identifying information in this section. |                         |
| Please provide any notes below:                                                         |                         |

**EXM\_END**

## Montreal Cognitive Assessment (MoCA)

*Training and certification is required by any clinical, health professional, or worker who wishes to administer, score and interpret the Montreal Cognitive Assessment (MoCA) test. The MoCA © may be used, reproduced, and distributed **WITH** permission for universities/foundations/health professionals/hospitals/clinics/public health institutes.*

|                 |                                                                                                                                                                                                                                                                                                                                                                                                                                                                                                                                                                                                                                                                                                                                                                                                                                                                                                                                                                                                                                                                                                                                                                                                                                                                                                                                                                                                                                                                                                                                                                                                                                                                                                                                                                                                                                                                                                                                                                                                                                                                                                                                                |
|-----------------|------------------------------------------------------------------------------------------------------------------------------------------------------------------------------------------------------------------------------------------------------------------------------------------------------------------------------------------------------------------------------------------------------------------------------------------------------------------------------------------------------------------------------------------------------------------------------------------------------------------------------------------------------------------------------------------------------------------------------------------------------------------------------------------------------------------------------------------------------------------------------------------------------------------------------------------------------------------------------------------------------------------------------------------------------------------------------------------------------------------------------------------------------------------------------------------------------------------------------------------------------------------------------------------------------------------------------------------------------------------------------------------------------------------------------------------------------------------------------------------------------------------------------------------------------------------------------------------------------------------------------------------------------------------------------------------------------------------------------------------------------------------------------------------------------------------------------------------------------------------------------------------------------------------------------------------------------------------------------------------------------------------------------------------------------------------------------------------------------------------------------------------------|
| <b>Overview</b> | <p>The Montreal Cognitive Assessment (MoCA) was designed as a rapid screening instrument for mild cognitive dysfunction. It assesses different cognitive domains: attention and concentration, executive functions, memory, language, visuoconstructional skills, conceptual thinking, calculations, and orientation. Time to administer the MoCA is approximately 10 minutes. The total possible score is 30 points; a score of 26 or above is considered normal. There is an additional point added to the obtained score if the person being tested has 12 or fewer years of formal education. For the purposes of the CLSA Memory Study, we will categorize participant that did not graduate from secondary school or those who graduated secondary school but did not complete post-secondary education as having 12 or fewer years of formal education.</p> <p>The MoCA memory section provides two trials to learn a word list of five nouns followed by a delay in which subjects are asked questions from other sections of the MoCA (i.e., attention, sentence repetition, letter fluency, similarities). The delay is variable, but estimated at five minutes followed by free recall of the 5-word list. This is followed by a category-cued semantic recall condition, and, finally, a multiple choice-cued recall from presentation of the correct item paired with two items within the same category but not on the list. Only the points earned in the delayed <i>free</i> recall condition of the memory section (1 point per correct word) are added to the MoCA total score. The MoCA-MIS includes points for the free recall condition and the cued conditions (3 points for each word on free recall, 2 for each on category-cued recall, 1 for each on multiple-choice recall).</p> <p>For those with severe visual impairment, the MoCA-BLIND can be utilized. This is scored out of 22 with normal being a score of 18 or higher. The correction for limited formal education described above is also used for the MoCA-BLIND.</p> <p>Clinicians are expected to complete this module using the provided script.</p> |
|-----------------|------------------------------------------------------------------------------------------------------------------------------------------------------------------------------------------------------------------------------------------------------------------------------------------------------------------------------------------------------------------------------------------------------------------------------------------------------------------------------------------------------------------------------------------------------------------------------------------------------------------------------------------------------------------------------------------------------------------------------------------------------------------------------------------------------------------------------------------------------------------------------------------------------------------------------------------------------------------------------------------------------------------------------------------------------------------------------------------------------------------------------------------------------------------------------------------------------------------------------------------------------------------------------------------------------------------------------------------------------------------------------------------------------------------------------------------------------------------------------------------------------------------------------------------------------------------------------------------------------------------------------------------------------------------------------------------------------------------------------------------------------------------------------------------------------------------------------------------------------------------------------------------------------------------------------------------------------------------------------------------------------------------------------------------------------------------------------------------------------------------------------------------------|

|                                                                                                                                                        |                      |     |
|--------------------------------------------------------------------------------------------------------------------------------------------------------|----------------------|-----|
| <b>MOC_1</b>                                                                                                                                           | <b>MOC_SIGHT_MSP</b> |     |
| <b>[ALWAYS ASK]</b>                                                                                                                                    |                      |     |
| Does the participant have any visual impairments that would prevent them from completing the standard MoCA which requires drawing on a piece of paper? |                      |     |
| YES                                                                                                                                                    | 1                    | Yes |
| NO                                                                                                                                                     | 2                    | No  |

### **1. Alternating Trail Making:**

**Administration:** The examiner instructs the subject: "Please draw a line, going from a number to a letter in ascending order. Begin here [point to (1)] and draw a line from 1 then to A then to 2 and so on. End here [point to (E)]."

|                                                                                                                                                                                                                |                      |                                                     |
|----------------------------------------------------------------------------------------------------------------------------------------------------------------------------------------------------------------|----------------------|-----------------------------------------------------|
| <b>MOC_2</b>                                                                                                                                                                                                   | <b>MOC_TRAIL_MSP</b> |                                                     |
| <b>[ASK IF MOC_SIGHT_MSP = NO]</b>                                                                                                                                                                             |                      |                                                     |
| Was the participant able to successfully complete the Alternating Trail Making task?                                                                                                                           |                      |                                                     |
| <b>CLINICIAN NOTE:</b> Successfully completing the Alternating Trail Making task required the participant to successfully draw the following pattern: 1-A-2-B-3-C-4-D-5-E without drawing any lines that cross |                      |                                                     |
| <b>CODE ONLY ONE RESPONSE</b>                                                                                                                                                                                  |                      |                                                     |
| YES                                                                                                                                                                                                            | 1                    | Yes                                                 |
| NO                                                                                                                                                                                                             | 2                    | No                                                  |
| REFUSED                                                                                                                                                                                                        | 9                    | <b>[DO NOT READ]</b> Participant refused to do task |

### **2. Visuoconstructional Skills (Cube):**

**Administration:** The examiner gives the following instructions, pointing to the cube: "Copy this drawing as accurately as you can, in the space below".

|                                                                                                                                                                                                                                         |                     |                                                     |
|-----------------------------------------------------------------------------------------------------------------------------------------------------------------------------------------------------------------------------------------|---------------------|-----------------------------------------------------|
| <b>MOC_3</b>                                                                                                                                                                                                                            | <b>MOC_CUBE_MSP</b> |                                                     |
| <b>[ASK IF MOC_SIGHT_MSP = NO]</b>                                                                                                                                                                                                      |                     |                                                     |
| Was the participant able to successfully complete the cube drawing task?                                                                                                                                                                |                     |                                                     |
| <b>CODE ONLY ONE RESPONSE</b>                                                                                                                                                                                                           |                     |                                                     |
| <b>CLINICIAN NOTE:</b> A successfully executed drawing must be:                                                                                                                                                                         |                     |                                                     |
| <ul style="list-style-type: none"> <li>• Three-dimensional</li> <li>• All lines are drawn</li> <li>• No line is added</li> <li>• Lines are relatively parallel and their length is similar (rectangular prisms are accepted)</li> </ul> |                     |                                                     |
| If any of the above criteria are not met, the cube was not successfully drawn.                                                                                                                                                          |                     |                                                     |
| YES                                                                                                                                                                                                                                     | 1                   | Yes                                                 |
| NO                                                                                                                                                                                                                                      | 2                   | No                                                  |
| REFUSED                                                                                                                                                                                                                                 | 9                   | <b>[DO NOT READ]</b> Participant refused to do task |

### **3. Visuoconstructional Skills (Clock):**

**Administration:** Indicate the right third of the space and give the following instructions: “Draw a clock. Put in all the numbers and set the time to 10 past 11”.

|                                                                                                                                                                                                                                      |                         |                                                     |
|--------------------------------------------------------------------------------------------------------------------------------------------------------------------------------------------------------------------------------------|-------------------------|-----------------------------------------------------|
| <b>MOC_4</b>                                                                                                                                                                                                                         | <b>MOC_CLOCKCON_MSP</b> |                                                     |
| <b>[ASK IF MOC_SIGHT_MSP = NO]</b>                                                                                                                                                                                                   |                         |                                                     |
| Contour - Did the participant successfully draw the circle of the clock?                                                                                                                                                             |                         |                                                     |
| <b>CLINICIAN NOTE:</b> For contour, a clock that has been correctly drawn must meet the following criteria: The clock face must be a circle with only minor distortion acceptable (e.g., slight imperfection on closing the circle). |                         |                                                     |
| <b>CODE ONLY ONE RESPONSE</b>                                                                                                                                                                                                        |                         |                                                     |
| YES                                                                                                                                                                                                                                  | 1                       | Yes                                                 |
| NO                                                                                                                                                                                                                                   | 2                       | No                                                  |
| REFUSED                                                                                                                                                                                                                              | 9                       | <b>[DO NOT READ]</b> Participant refused to do task |

|                                                                                                                                                                                                                                                                                                                                                                |                         |                                                     |
|----------------------------------------------------------------------------------------------------------------------------------------------------------------------------------------------------------------------------------------------------------------------------------------------------------------------------------------------------------------|-------------------------|-----------------------------------------------------|
| <b>MOC_5</b>                                                                                                                                                                                                                                                                                                                                                   | <b>MOC_CLOCKNUM_MSP</b> |                                                     |
| <b>[ASK IF MOC_SIGHT_MSP = NO]</b>                                                                                                                                                                                                                                                                                                                             |                         |                                                     |
| Numbers – Did the participant successfully draw the numbers on the clock?                                                                                                                                                                                                                                                                                      |                         |                                                     |
| <b>CLINICIAN NOTE:</b> For the numbers, a clock that has been correctly drawn must meet the following criteria: All clock numbers must be present with no additional numbers; numbers must be in the correct order and placed in the approximate quadrants on the clock face; Roman numerals are acceptable; numbers can be placed outside the circle contour. |                         |                                                     |
| <b>CODE ONLY ONE RESPONSE</b>                                                                                                                                                                                                                                                                                                                                  |                         |                                                     |
| YES                                                                                                                                                                                                                                                                                                                                                            | 1                       | Yes                                                 |
| NO                                                                                                                                                                                                                                                                                                                                                             | 2                       | No                                                  |
| REFUSED                                                                                                                                                                                                                                                                                                                                                        | 9                       | <b>[DO NOT READ]</b> Participant refused to do task |

|                                    |                          |  |
|------------------------------------|--------------------------|--|
| <b>MOC_6</b>                       | <b>MOC_CLOCKHAND_MSP</b> |  |
| <b>[ASK IF MOC_SIGHT_MSP = NO]</b> |                          |  |

|                                                                                                                                                                                                                                                                                                                                   |   |                                                     |
|-----------------------------------------------------------------------------------------------------------------------------------------------------------------------------------------------------------------------------------------------------------------------------------------------------------------------------------|---|-----------------------------------------------------|
| Hands - Did the participant successfully draw the hands on the clock?                                                                                                                                                                                                                                                             |   |                                                     |
| <b>CODE ONLY ONE RESPONSE</b>                                                                                                                                                                                                                                                                                                     |   |                                                     |
| <b>CLINICIAN NOTE:</b> For the hands, a clock that has been correctly drawn must meet the following criteria: There must be two hands jointly indicating the correct time; the hour hand must be clearly shorter than the minute hand; hands must be centred within the clock face with their junction close to the clock centre. |   |                                                     |
| YES                                                                                                                                                                                                                                                                                                                               | 1 | Yes                                                 |
| NO                                                                                                                                                                                                                                                                                                                                | 2 | No                                                  |
| REFUSED                                                                                                                                                                                                                                                                                                                           | 9 | <b>[DO NOT READ]</b> Participant refused to do task |

**4. Naming:**

Administration: Beginning on the left, point to each figure and say: *"Tell me the name of this animal"*.

|                                                                                                                                  |                        |                                                     |
|----------------------------------------------------------------------------------------------------------------------------------|------------------------|-----------------------------------------------------|
| <b>MOC_7</b>                                                                                                                     | <b>MOC_ANIMALS_MSP</b> |                                                     |
| <b>[ASK IF MOC_SIGHT_MSP = NO]</b>                                                                                               |                        |                                                     |
| How many animals were correctly named by the participant?                                                                        |                        |                                                     |
| <b>CLINICIAN NOTES:</b> One point is given for the following responses: (1) lion (2) rhinoceros or rhino (3) camel or dromedary. |                        |                                                     |
| <b>CODE ONLY ONE RESPONSE</b>                                                                                                    |                        |                                                     |
| ONE                                                                                                                              | 1                      | One                                                 |
| TWO                                                                                                                              | 2                      | Two                                                 |
| THREE                                                                                                                            | 3                      | Three                                               |
| NONE                                                                                                                             | 4                      | None of the animals were correctly named            |
| REFUSED                                                                                                                          | 9                      | <b>[DO NOT READ]</b> Participant refused to do task |

**5. Memory:**

Administration: The examiner reads a list of 5 words at a rate of one per second, giving the following instructions: *"This is a memory test. I am going to read a list of words that you will have to remember now"*

and later on. Listen carefully. When I am through, tell me as many words as you can remember. It doesn't matter in what order you say them".

"Face, velvet, church, daisy, red"

**Administration:** When the subject indicates that (s)he has finished (has recalled all words), or can recall no more words, read the list a second time with the following instructions: "I am going to read the same list for a second time. Try to remember and tell me as many words as you can, including words you said the first time."

"Face, velvet, church, daisy, red"

**Administration:** At the end of the second trial, inform the participant that he/she will be asked to recall these words again by saying: "I will ask you to recall these words again at the end of the test."

## 6. Attention:

**Forward Digit Span: Administration:** Give the following instruction: "I am going to say some numbers and when I am through, repeat them to me exactly as I said them". Read the five number sequence at the rate of one digit per second.

"2, 1, 8, 5, 4"

|                                                                                      |                        |                                                     |
|--------------------------------------------------------------------------------------|------------------------|-----------------------------------------------------|
| <b>MOC_8</b>                                                                         | <b>MOC_NUMFORW_MSP</b> |                                                     |
| <b>[ALWAYS ASK]</b>                                                                  |                        |                                                     |
| Was the participant able to repeat the numbers "2, 1, 8, 5, 4" in the forward order? |                        |                                                     |
| <b>CODE ONLY ONE RESPONSE</b>                                                        |                        |                                                     |
| YES                                                                                  | 1                      | Yes                                                 |
| NO                                                                                   | 2                      | No                                                  |
| REFUSED                                                                              | 9                      | <b>[DO NOT READ]</b> Participant refused to do task |

**Attention. Backward Digit Span: Administration:** Give the following instruction: "Now I am going to say some more numbers, but when I am through you must repeat them to me in the backwards order."

"7, 4, 2."

|                                                                                 |                        |                                                     |
|---------------------------------------------------------------------------------|------------------------|-----------------------------------------------------|
| <b>MOC_9</b>                                                                    | <b>MOC_NUMBACK_MSP</b> |                                                     |
| <b>[ALWAYS ASK]</b>                                                             |                        |                                                     |
| Was the participant able to repeat the numbers "7, 4, 2" in the backward order? |                        |                                                     |
| <b>CODE ONLY ONE RESPONSE</b>                                                   |                        |                                                     |
| YES                                                                             | 1                      | Yes                                                 |
| NO                                                                              | 2                      | No                                                  |
| REFUSED                                                                         | 9                      | <b>[DO NOT READ]</b> Participant refused to do task |

**Vigilance:** The examiner reads the list of letters at a rate of one per second, after giving the following instruction: “I am going to read a sequence of letters. Every time I say the letter A, tap your hand once. If a say a different letter, do not tap your hand”.

“F B A C M N A A J K L B A F A K D E A A A J A M O F A A B”

|                                                                                                                    |                       |                                                     |
|--------------------------------------------------------------------------------------------------------------------|-----------------------|-----------------------------------------------------|
| <b>MOC_10</b>                                                                                                      | <b>MOC_LETTER_MSP</b> |                                                     |
| <b>[ALWAYS ASK]</b>                                                                                                |                       |                                                     |
| Did the participant make zero to one errors (an error is a tap on a wrong letter or a failure to tap on letter A)? |                       |                                                     |
| <b>CODE ONLY ONE RESPONSE</b>                                                                                      |                       |                                                     |
| YES                                                                                                                | 1                     | Yes, the participant made 0 or one errors           |
| NO                                                                                                                 | 2                     | No, the participant made two or more errors         |
| REFUSED                                                                                                            | 9                     | <b>[DO NOT READ]</b> Participant refused to do task |

**Serial 7s:** The examiner gives the following instruction: “Now, I will ask you to count by subtracting seven from 100, and then, keep subtracting seven from your answer until I tell you to stop”. Give this instruction twice if necessary.

|                                                                                                                                                                                                                                                                                                                                                                                                                                                                                                                                                                                                                                                                                                                                                                  |                     |                                                     |
|------------------------------------------------------------------------------------------------------------------------------------------------------------------------------------------------------------------------------------------------------------------------------------------------------------------------------------------------------------------------------------------------------------------------------------------------------------------------------------------------------------------------------------------------------------------------------------------------------------------------------------------------------------------------------------------------------------------------------------------------------------------|---------------------|-----------------------------------------------------|
| <b>MOC_11</b>                                                                                                                                                                                                                                                                                                                                                                                                                                                                                                                                                                                                                                                                                                                                                    | <b>MOC_SUBS_MSP</b> |                                                     |
| <b>[ALWAYS ASK]</b>                                                                                                                                                                                                                                                                                                                                                                                                                                                                                                                                                                                                                                                                                                                                              |                     |                                                     |
| How many correct subtractions did the participant make?                                                                                                                                                                                                                                                                                                                                                                                                                                                                                                                                                                                                                                                                                                          |                     |                                                     |
| <b>CLINICIAN NOTES:</b> This item is scored out of 3 points. Give no (0) points for no correct subtractions, 1 point for one correct subtraction, 2 points for two-to-three correct subtractions, and 3 points if the participant successfully makes four or five correct subtractions. Count each correct subtraction of 7 beginning at 100. Each subtraction is evaluated independently; that is, if the participant responds with an incorrect number but continues to correctly subtract 7 from it, give a point for each correct subtraction. For example, a participant may respond “92 – 85 – 78 – 71 – 64” where the “92” is incorrect, but all subsequent numbers are subtracted correctly. This is one error and the item would be given a score of 3. |                     |                                                     |
| <b>CODE ONLY ONE RESPONSE</b>                                                                                                                                                                                                                                                                                                                                                                                                                                                                                                                                                                                                                                                                                                                                    |                     |                                                     |
| ZERO                                                                                                                                                                                                                                                                                                                                                                                                                                                                                                                                                                                                                                                                                                                                                             | 0                   | Zero                                                |
| ONE                                                                                                                                                                                                                                                                                                                                                                                                                                                                                                                                                                                                                                                                                                                                                              | 1                   | One                                                 |
| TWO_THREE                                                                                                                                                                                                                                                                                                                                                                                                                                                                                                                                                                                                                                                                                                                                                        | 2                   | Two or three                                        |
| FOUR_FIVE                                                                                                                                                                                                                                                                                                                                                                                                                                                                                                                                                                                                                                                                                                                                                        | 3                   | Four or five                                        |
| REFUSED                                                                                                                                                                                                                                                                                                                                                                                                                                                                                                                                                                                                                                                                                                                                                          | 9                   | <b>[DO NOT READ]</b> Participant refused to do task |

**7. Sentence repetition:**

**Administration:** The examiner gives the following instructions: “I am going to read you a sentence. Repeat it after me, exactly as I say it [pause]: I only know that John is the one to help today.”. Following the response, say: “Now I am going to read you another sentence. Repeat it after me, exactly as I say it [pause]: The cat always hid under the couch when dogs were in the room”.

|                                                                                                                                                                                                                                                            |                      |                                                     |
|------------------------------------------------------------------------------------------------------------------------------------------------------------------------------------------------------------------------------------------------------------|----------------------|-----------------------------------------------------|
| <b>MOC_12</b>                                                                                                                                                                                                                                              | <b>MOC_REPET_MSP</b> |                                                     |
| <b>[ALWAYS ASK]</b>                                                                                                                                                                                                                                        |                      |                                                     |
| How many of the sentences did the participant correctly repeat?                                                                                                                                                                                            |                      |                                                     |
| <b>CLINICIAN NOTES:</b> Repetition must be exact. Be alert for errors that are omissions (e.g., omitting "only", "always") and substitutions/additions (e.g., "John is the one who helped today;" substituting "hides" for "hid", altering plurals, etc.). |                      |                                                     |
| <b>CODE ONLY ONE RESPONSE</b>                                                                                                                                                                                                                              |                      |                                                     |
| ZERO                                                                                                                                                                                                                                                       | 0                    | Zero                                                |
| ONE                                                                                                                                                                                                                                                        | 1                    | One                                                 |
| TWO                                                                                                                                                                                                                                                        | 2                    | Two                                                 |
| REFUSED                                                                                                                                                                                                                                                    | 9                    | <b>[DO NOT READ]</b> Participant refused to do task |

**8. Verbal fluency:**

**Administration:** The examiner gives the following instruction: “Tell me as many words as you can think of that begin with a certain letter of the alphabet that I will tell you in a moment. You can say any kind of word you want, except for proper nouns (like Bob or Boston), numbers, or words that begin with the same sound but have a different suffix, for example, love, lover, loving. I will tell you to stop after one minute. Are you ready? [Pause] Now, tell me as many words as you can think of that begin with the letter F. [time for 60 sec]. Stop.”

|                                                   |                       |                                                     |
|---------------------------------------------------|-----------------------|-----------------------------------------------------|
| <b>MOC_13</b>                                     | <b>MOC_WORDSF_MSP</b> |                                                     |
| <b>[ALWAYS ASK]</b>                               |                       |                                                     |
| Please record the words that the participant says |                       |                                                     |
|                                                   |                       |                                                     |
| REFUSED                                           | 9                     | <b>[DO NOT READ]</b> Participant refused to do task |



|                                                                                      |                          |                                                     |
|--------------------------------------------------------------------------------------|--------------------------|-----------------------------------------------------|
| <b>MOC_14</b>                                                                        | <b>MOC_WORDSFNUM_MSP</b> |                                                     |
| <b>[ASK IF MOC_WORDSF ≠ REFUSED ]</b>                                                |                          |                                                     |
| How many words did the participant say in one minute that begin with the letter “F”? |                          |                                                     |
| <b>CODE ONLY ONE RESPONSE</b>                                                        |                          |                                                     |
| 10_LESS                                                                              | 00                       | Less than 11 words                                  |
| 11_MORE                                                                              | 01                       | 11 or more words                                    |
| REFUSED                                                                              | 99                       | <b>[DO NOT READ]</b> Participant refused to do task |

### 9. **Abstraction:**

**Administration:** The examiner asks the subject to explain what each pair of words has in common, starting with the example: “*Tell me how an orange and a banana are alike*”. If the subject answers in a concrete manner, then say only one additional time: “*Tell me another way in which those items are alike*”. If the subject does not give the appropriate response (fruit), say, “*Yes, and they are also both fruit.*” Do not give any additional instructions or clarification. After the practice trial, say: “*Now, tell me how a train and a bicycle are alike*”. Following the response, administer the second trial, saying: “*Now tell me how a ruler and a watch are alike*”. Do not give any additional instructions or prompts.

|                                                                                                                                                                                                                                                                                                                                                                                                                        |                        |                                                     |
|------------------------------------------------------------------------------------------------------------------------------------------------------------------------------------------------------------------------------------------------------------------------------------------------------------------------------------------------------------------------------------------------------------------------|------------------------|-----------------------------------------------------|
| <b>MOC_15</b>                                                                                                                                                                                                                                                                                                                                                                                                          | <b>MOC_WORDSIM_MSP</b> |                                                     |
| <b>[ALWAYS ASK]</b>                                                                                                                                                                                                                                                                                                                                                                                                    |                        |                                                     |
| How many combinations of words did the participant identify the similarity between?                                                                                                                                                                                                                                                                                                                                    |                        |                                                     |
| <b>CLINICIAN NOTES:</b> Only the last two item pairs are scored. Give 1 point to each item pair correctly answered. The following responses are acceptable: Train-bicycle = means of transportation, means of travelling, you take trips in both; Ruler-watch = measuring instruments, used to measure. The following responses are not acceptable: Train-bicycle = they have wheels; Ruler-watch = they have numbers. |                        |                                                     |
| <b>CODE ONLY ONE RESPONSE</b>                                                                                                                                                                                                                                                                                                                                                                                          |                        |                                                     |
| NONE                                                                                                                                                                                                                                                                                                                                                                                                                   | 0                      | None                                                |
| ONE                                                                                                                                                                                                                                                                                                                                                                                                                    | 1                      | One                                                 |
| TWO                                                                                                                                                                                                                                                                                                                                                                                                                    | 2                      | Two                                                 |
| REFUSED                                                                                                                                                                                                                                                                                                                                                                                                                | 9                      | <b>[DO NOT READ]</b> Participant refused to do task |

**10. Delayed recall:**

**Administration:** The examiner gives the following instruction: “I read some words to you earlier, which I asked you to remember. Tell me as many of those words as you can remember.”

|                                                                                           |              |                                                     |
|-------------------------------------------------------------------------------------------|--------------|-----------------------------------------------------|
| MOC_16                                                                                    | MOC_MEM3_MSP |                                                     |
| <b>[ALWAYS ASK]</b>                                                                       |              |                                                     |
| .Please record which words the participant is able to spontaneously recall.               |              |                                                     |
| <b>MULTIPLE RESPONSES ALLOWED (EXCEPT IF 96, OR 99 ARE SELECTED), CODE ALL THAT APPLY</b> |              |                                                     |
| FACE                                                                                      | 01           | Face                                                |
| VELVET                                                                                    | 02           | Velvet                                              |
| CHURCH                                                                                    | 03           | Church                                              |
| DAISY                                                                                     | 04           | Daisy                                               |
| RED                                                                                       | 05           | Red                                                 |
| NONE                                                                                      | 96           | Did not remember any of the words                   |
| REFUSED                                                                                   | 99           | <b>[DO NOT READ]</b> Participant refused to do task |

**10b. Delayed recall – optional component:**

**Administration:** Following the delayed free recall trial, prompt the subject with the semantic category cue provided below for any word not recalled. Prompt all non-recalled words in this manner.

| Word   | Category cue     |
|--------|------------------|
| Face   | Part of the body |
| Velvet | Type of fabric   |
| Church | Type of building |
| Daisy  | Type of flower   |
| Red    | A colour         |

|        |                 |
|--------|-----------------|
| MOC_17 | MOC_MISCUE1_MSP |
|--------|-----------------|

|                                                                                                                                                                                                                                                                                                                                |    |                                                     |
|--------------------------------------------------------------------------------------------------------------------------------------------------------------------------------------------------------------------------------------------------------------------------------------------------------------------------------|----|-----------------------------------------------------|
| <b>[SKIP IF MOC_MEM3_MSP = FACE AND VELVET AND CHURCH AND DAISY AND RED]</b>                                                                                                                                                                                                                                                   |    |                                                     |
| Please indicate which words the participant produces on this third trial.                                                                                                                                                                                                                                                      |    |                                                     |
| <b>CLINICIAN NOTE:</b> Please select each word that the participant correctly recalled with the category cue provided. Do not select words that the participant correctly remembered spontaneously.                                                                                                                            |    |                                                     |
| A cue is used for clinical information purposes only and can give the test interpreter additional information about the type of memory disorder. For memory deficits due to retrieval failures, performance can be improved with a cue. For memory deficits due to encoding failures, performance does not improve with a cue. |    |                                                     |
| <b>MULTIPLE RESPONSES ALLOWED (EXCEPT IF 96 OR 99 ARE SELECTED), CODE ALL THAT APPLY</b>                                                                                                                                                                                                                                       |    |                                                     |
| FACE                                                                                                                                                                                                                                                                                                                           | 01 | Face                                                |
| VELVET                                                                                                                                                                                                                                                                                                                         | 02 | Velvet                                              |
| CHURCH                                                                                                                                                                                                                                                                                                                         | 03 | Church                                              |
| DAISY                                                                                                                                                                                                                                                                                                                          | 04 | Daisy                                               |
| RED                                                                                                                                                                                                                                                                                                                            | 05 | Red                                                 |
| NONE                                                                                                                                                                                                                                                                                                                           | 96 | Did not remember any of the words                   |
| REFUSED                                                                                                                                                                                                                                                                                                                        | 99 | <b>[DO NOT READ]</b> Participant refused to do task |

If the subject does not recall the word after the category cue, give him/her a multiple choice trial, using the following example instruction, "*Which of the following words do you think it was, NOSE, FACE, or HAND?*"

| <b>Word</b> | <b>Multiple choice cue</b> |
|-------------|----------------------------|
| Face        | Nose, face, hand           |
| Velvet      | Denim, cotton, velvet      |
| Church      | Church, school, hospital   |
| Daisy       | Rose, daisy, tulip         |
| Red         | Red, blue, green           |

|                                                                                                 |                        |
|-------------------------------------------------------------------------------------------------|------------------------|
| <b>MOC_18</b>                                                                                   | <b>MOC_MISCUE2_MSP</b> |
| <b>[SKIP IF MOC_MEM3_MSP OR MOC_MISCUE1_MSP = FACE AND VELVET AND CHURCH AND DAISY AND RED]</b> |                        |

|                                                                                                                                                                                                                                |    |                                                     |
|--------------------------------------------------------------------------------------------------------------------------------------------------------------------------------------------------------------------------------|----|-----------------------------------------------------|
| Please indicate which words the participant produces on this third trial.                                                                                                                                                      |    |                                                     |
| <b>CLINICIAN NOTE:</b> Please select each word that the participant correctly recalled with the category cue provided. Do not select words that the participant correctly remembered spontaneously or using the category cues. |    |                                                     |
| <b>MULTIPLE RESPONSES ALLOWED (EXCEPT IF 96 OR 99 ARE SELECTED), CODE ALL THAT APPLY</b>                                                                                                                                       |    |                                                     |
| FACE                                                                                                                                                                                                                           | 01 | Face                                                |
| VELVET                                                                                                                                                                                                                         | 02 | Velvet                                              |
| CHURCH                                                                                                                                                                                                                         | 03 | Church                                              |
| DAISY                                                                                                                                                                                                                          | 04 | Daisy                                               |
| RED                                                                                                                                                                                                                            | 05 | Red                                                 |
| NONE                                                                                                                                                                                                                           | 96 | Did not remember any of the words                   |
| REFUSED                                                                                                                                                                                                                        | 99 | <b>[DO NOT READ]</b> Participant refused to do task |

**11. Orientation:**

**Administration:** The examiner gives the following instructions: “*Tell me the date today*”. If the subject does not give a complete answer, then prompt accordingly by saying: “*Tell me the [year, month, exact date, and day of the week]*.” Then say: “*Now, tell me the name of this place, and which city it is in.*”

|                                                                                                                                                                                                                |                       |                                                                                   |
|----------------------------------------------------------------------------------------------------------------------------------------------------------------------------------------------------------------|-----------------------|-----------------------------------------------------------------------------------|
| <b>MOC_19</b>                                                                                                                                                                                                  | <b>MOC_ORIENT_MSP</b> |                                                                                   |
| <b>[ALWAYS ASK]</b>                                                                                                                                                                                            |                       |                                                                                   |
| Which of the following orientation features did the participant correctly identify?                                                                                                                            |                       |                                                                                   |
| <b>CLINICIAN NOTES:</b> The subject must tell the exact date and the exact place (name of hospital, clinic, office). No points are allocated if subject makes an error (even of one day) for the day and date. |                       |                                                                                   |
| <b>MULTIPLE RESPONSES ALLOWED (EXCEPT IF 96 OR 99 ARE SELECTED), CODE ALL THAT APPLY</b>                                                                                                                       |                       |                                                                                   |
| DATE                                                                                                                                                                                                           | 01                    | Date                                                                              |
| MONTH                                                                                                                                                                                                          | 02                    | Month                                                                             |
| YEAR                                                                                                                                                                                                           | 03                    | Year                                                                              |
| DAY                                                                                                                                                                                                            | 04                    | Day                                                                               |
| PLACE                                                                                                                                                                                                          | 05                    | Place                                                                             |
| CITY                                                                                                                                                                                                           | 06                    | City                                                                              |
| NONE                                                                                                                                                                                                           | 96                    | None – the participant did not correctly identify any of the orientation features |
| REFUSED                                                                                                                                                                                                        | 99                    | <b>[DO NOT READ]</b> Participant refused to do task                               |

|                                          |                            |  |
|------------------------------------------|----------------------------|--|
| <b>MOC_20</b>                            | <b>MOC_TOTALSCORE0_MSP</b> |  |
| <b>[CALCULATE IF MOC_SIGHT_MSP = NO]</b> |                            |  |

|                                                                                                                                                                                                                                                                                                                                                                                                                                                                                                                                                                                                                                                                                                                                                                              |
|------------------------------------------------------------------------------------------------------------------------------------------------------------------------------------------------------------------------------------------------------------------------------------------------------------------------------------------------------------------------------------------------------------------------------------------------------------------------------------------------------------------------------------------------------------------------------------------------------------------------------------------------------------------------------------------------------------------------------------------------------------------------------|
| <p><b>The Montreal Cognitive Assessment (MoCA) is scored out of a maximum of 30 points. A final total score of 26 and above is considered normal. Total score on the MoCA: 0</b></p>                                                                                                                                                                                                                                                                                                                                                                                                                                                                                                                                                                                         |
| <p><b>CLINICIAN NOTES:</b> One point has been added for individuals who have 12 years or fewer of formal education.</p>                                                                                                                                                                                                                                                                                                                                                                                                                                                                                                                                                                                                                                                      |
| <p>[CALCULATED VARIABLE: MOC_TRAIL + MOC_CUBE + MOC_CLOCKCON + MOC_CLOCKNUM + MOC_CLOCKHAND + MOC_ANIMALS:ONE + MOC_ANIMALS:TWO + MOC_ANIMALS:TWO + MOC_ANIMALS:THREE + MOC_ANIMALS:THREE + MOC_ANIMALS:THREE + MOC_NUMFORW + MOC_NUMBACK + MOC_LETTER:YES + MOC_SUBS:ONE + \$MOC_SUBS:TWO_THREE + MOC_SUBS:TWO_THREE + MOC_SUBS:FOUR_FIVE + MOC_SUBS:FOUR_FIVE + MOC_SUBS:FOUR_FIVE + MOC_REPET:ONE + MOC_REPET:TWO + MOC_REPET:TWO + MOC_WORDSFNUM:11_MORE + MOC_WORDSIM:ONE + MOC_WORDSIM:TWO + MOC_WORDSIM:TWO + MOC_MEM3:FACE + MOC_MEM3:VELVET + MOC_MEM3:CHURCH + MOC_MEM3:DAISY + MOC_MEM3:RED + MOC_ORIENT:DATE + MOC_ORIENT:MONTH + MOC_ORIENT:YEAR + MOC_ORIENT:DAY + MOC_ORIENT:PLACE + MOC_ORIENT:CITY + 1 IF BASELINE EDUCATION WAS 12 YEARS OR LESS == 0]</p> |

VARIABLES MOC\_21 TO MOC\_51 SHOULD BE CALCULATED AS FOLLOWED:

**VARIABLE NAME:** MOC\_TOTALSCORE[NUMBER] SHOULD INCREASE SEQUENTIALLY FROM 1 TO 30.

**VARIABLE DESCRIPTION:** TOTAL SCORE ON MONTREAL COGNITIVE ASSESSMENT (MOCA): [NUMBER] SHOULD INCREASE SEQUENTIALLY FROM 1 TO 30.

**VARIABLE CALCULATION:** THE TOTAL SCORE THAT THE VARIABLE CALCULATION EQUALS SHOULD INCREASE SEQUENTIALLY FROM 1 TO 30

|                                                                                                                                                                                                                                                                                                                                                                                                                                                                                                                                                                                                                                                                                                                                                                                                                                                                                                                                                                                                                                          |                   |
|------------------------------------------------------------------------------------------------------------------------------------------------------------------------------------------------------------------------------------------------------------------------------------------------------------------------------------------------------------------------------------------------------------------------------------------------------------------------------------------------------------------------------------------------------------------------------------------------------------------------------------------------------------------------------------------------------------------------------------------------------------------------------------------------------------------------------------------------------------------------------------------------------------------------------------------------------------------------------------------------------------------------------------------|-------------------|
| MOC_52                                                                                                                                                                                                                                                                                                                                                                                                                                                                                                                                                                                                                                                                                                                                                                                                                                                                                                                                                                                                                                   | MOC_TOTALMIS0_MSP |
| [CALCULATE IF MOC_SIGHT_MSP = NO]                                                                                                                                                                                                                                                                                                                                                                                                                                                                                                                                                                                                                                                                                                                                                                                                                                                                                                                                                                                                        |                   |
| <b>CLINICIAN NOTES:</b> There were not any skipped items on the Montreal Cognitive Assessment (MoCA).                                                                                                                                                                                                                                                                                                                                                                                                                                                                                                                                                                                                                                                                                                                                                                                                                                                                                                                                    |                   |
| <p>[CALCULATED VARIABLE, (\$MOC_TRAIL.refuse()\$ ? 1 : 0) + (\$MOC_CUBE.refuse()\$ ? 1 : 0) + (\$MOC_CLOCKCON.refuse()\$ ? 1 : 0) + (\$MOC_CLOCKNUM.refuse()\$ ? 1 : 0) + \$MOC_CLOCKHAND.refuse()\$ ? 1 : 0) + (\$MOC_ANIMALS.refuse()\$ ? 1 : 0) + \$MOC_ANIMALS.refuse()\$ ? 1 : 0) + (\$MOC_ANIMALS.refuse()\$ ? 1 : 0) + (\$MOC_NUMFORW.refuse()\$ ? 1 : 0) + (\$MOC_NUMBACK.refuse()\$ ? 1 : 0) + (\$MOC_LETTER.refuse()\$ ? 1 : 0) + (\$MOC_SUBS.refuse()\$ ? 1 : 0) + (\$MOC_SUBS.refuse()\$ ? 1 : 0) + (\$MOC_SUBS.refuse()\$ ? 1 : 0) + (\$MOC_REPET.refuse()\$ ? 1 : 0) + (\$MOC_REPET.refuse()\$ ? 1 : 0) + (\$MOC_WORDSFNUM.refuse()\$ ? 1 : 0) + (\$MOC_WORDSIM.refuse()\$ ? 1 : 0) + (\$MOC_WORDSIM.refuse()\$ ? 1 : 0) + (\$MOC_MEM3.refuse()\$ ? 1 : 0) + (\$MOC_ORIENT.refuse()\$ ? 1 : 0) == 0]</p> |                   |

|                                                                                                                                                                                                                                                                                                                                                               |                   |
|---------------------------------------------------------------------------------------------------------------------------------------------------------------------------------------------------------------------------------------------------------------------------------------------------------------------------------------------------------------|-------------------|
| MOC_53                                                                                                                                                                                                                                                                                                                                                        | MOC_TOTALMIS1_MSP |
| [CALCULATE IF MOC_SIGHT_MSP = NO]                                                                                                                                                                                                                                                                                                                             |                   |
| <b>CLINICIAN NOTES:</b> Not all components of the Montreal Cognitive Assessment (MoCA) may have been completed. This variable identifies the number of points out of the total score of 30 that the participant did not receive due to skipping tasks on the MoCA and should be considered when interpreting the total score of the MoCA. Number of points: 1 |                   |

[CALCULATED VARIABLE, (\$MOC\_TRAIL.refuse()\$ ? 1 : 0) + (\$MOC\_CUBE.refuse()\$ ? 1 : 0) + (\$MOC\_CLOCKCON.refuse()\$ ? 1 : 0) + (\$MOC\_CLOCKNUM.refuse()\$ ? 1 : 0) + (\$MOC\_CLOCKHAND.refuse()\$ ? 1 : 0) + (\$MOC\_ANIMALS.refuse()\$ ? 1 : 0) + (\$MOC\_ANIMALS.refuse()\$ ? 1 : 0) + (\$MOC\_ANIMALS.refuse()\$ ? 1 : 0) + (\$MOC\_NUMFORW.refuse()\$ ? 1 : 0) + (\$MOC\_NUMBACK.refuse()\$ ? 1 : 0) + (\$MOC\_LETTER.refuse()\$ ? 1 : 0) + (\$MOC\_SUBS.refuse()\$ ? 1 : 0) + (\$MOC\_SUBS.refuse()\$ ? 1 : 0) + (\$MOC\_SUBS.refuse()\$ ? 1 : 0) + (\$MOC\_REPET.refuse()\$ ? 1 : 0) + (\$MOC\_REPET.refuse()\$ ? 1 : 0) + (\$MOC\_WORDSFNUM.refuse()\$ ? 1 : 0) + (\$MOC\_WORDSIM.refuse()\$ ? 1 : 0) + (\$MOC\_WORDSIM.refuse()\$ ? 1 : 0) + (\$MOC\_MEM3.refuse()\$ ? 1 : 0) + (\$MOC\_ORIENT.refuse()\$ ? 1 : 0) == 1]

VARIABLES MOC\_54 TO MOC\_62 SHOULD BE CALCULATED AS FOLLOVED:

**VARIABLE NAME:** MOC\_TOTALMIS[NUMBER] SHOULD INCREASE SEQUENTIALLY FROM 2 TO 10 OR MORE.

**VARIABLE DESCRIPTION:** TOTAL NUMBER OF MISSING POINTS ON MONTREAL COGNITIVE ASSESSMENT (MOCA): [NUMBER] SHOULD INCREASE SEQUENTIALLY FROM 1 TO 10 OR MORE.

**VARIABLE CALCULATION:** THE TOTAL SCORE THAT THE VARIABLE CALCULATION EQUALS SHOULD INCREASE SEQUENTIALLY FROM 1 TO 10 OR MORE

|                                                                                                                                                                                                                                                                                                                                                                                                                                                                                                                                                                                |                      |
|--------------------------------------------------------------------------------------------------------------------------------------------------------------------------------------------------------------------------------------------------------------------------------------------------------------------------------------------------------------------------------------------------------------------------------------------------------------------------------------------------------------------------------------------------------------------------------|----------------------|
| MOC_63                                                                                                                                                                                                                                                                                                                                                                                                                                                                                                                                                                         | MOC_BLINDTSCORE0_MSP |
| [CALCULATE IF MOC_SIGHT_MSP = YES]                                                                                                                                                                                                                                                                                                                                                                                                                                                                                                                                             |                      |
| Total score on the Montreal Cognitive Assessment (MoCA) Blind version : 0                                                                                                                                                                                                                                                                                                                                                                                                                                                                                                      |                      |
| CLINICIAN NOTES: One point has been added for individuals who have 12 years or fewer of formal education, for a possible maximum of 22 points. A final total score of 18 and above is considered normal.                                                                                                                                                                                                                                                                                                                                                                       |                      |
| [CALCULATED VARIABLE: MOC_NUMFORW + MOC_NUMBACK + MOC_LETTER:YES + MOC_SUBS:ONE + \$MOC_SUBS:TWO_THREE + MOC_SUBS:TWO_THREE + MOC_SUBS:FOUR_FIVE + MOC_SUBS:FOUR_FIVE + MOC_SUBS:FOUR_FIVE + MOC_REPET:ONE + MOC_REPET:TWO + MOC_REPET:TWO + MOC_WORDSFNUM:11_MORE + MOC_WORDSIM:ONE + MOC_WORDSIM:TWO + MOC_WORDSIM:TWO + MOC_MEM3:FACE + MOC_MEM3:VELVET + MOC_MEM3:CHURCH + MOC_MEM3:DAISY + MOC_MEM3:RED + MOC_ORIENT:DATE + MOC_ORIENT:MONTH + MOC_ORIENT:YEAR + MOC_ORIENT:DAY + MOC_ORIENT:PLACE + MOC_ORIENT:CITY + 1 IF BASELINE EDUCATION WAS 12 YEARS OR LESS == 0] |                      |

VARIABLES MOC\_64 TO MOC\_86 SHOULD BE CALCULATED AS FOLLOVED:

**VARIABLE NAME:** MOC\_BLINDTSCORE [NUMBER] SHOULD INCREASE SEQUENTIALLY FROM 1 TO 22.

**VARIABLE DESCRIPTION:** TOTAL SCORE ON MONTREAL COGNITIVE ASSESSMENT (MOCA) BLIND VERSION: [NUMBER] SHOULD INCREASE SEQUENTIALLY FROM 1 TO 22.

**VARIABLE CALCULATION:** THE TOTAL SCORE THAT THE VARIABLE CALCULATION EQUALS SHOULD INCREASE SEQUENTIALLY FROM 1 TO 22

|        |                   |
|--------|-------------------|
| MOC_87 | MOC_BLINDMIS0_MSP |
|--------|-------------------|

|                                                                                                                                                                                                                                                                                                                                                                                                                                                                                                                                                                                                                                                                                                                                         |
|-----------------------------------------------------------------------------------------------------------------------------------------------------------------------------------------------------------------------------------------------------------------------------------------------------------------------------------------------------------------------------------------------------------------------------------------------------------------------------------------------------------------------------------------------------------------------------------------------------------------------------------------------------------------------------------------------------------------------------------------|
| <b>[CALCULATE IF MOC_SIGHT_MSP = YES]</b>                                                                                                                                                                                                                                                                                                                                                                                                                                                                                                                                                                                                                                                                                               |
| <b>CLINICIAN NOTES:</b> There were not any skipped items on the Montreal Cognitive Assessment (MoCA) Blind version..                                                                                                                                                                                                                                                                                                                                                                                                                                                                                                                                                                                                                    |
| <b>[CALCULATED VARIABLE, (\$MOC_NUMFORW.refuse()\$ ? 1 : 0) + (\$MOC_NUMBACK.refuse()\$ ? 1 : 0) + (\$MOC_LETTER.refuse()\$ ? 1 : 0) + (\$MOC_SUBS.refuse()\$ ? 1 : 0) + (\$MOC_SUBS.refuse()\$ ? 1 : 0) + (\$MOC_REPET.refuse()\$ ? 1 : 0) + (\$MOC_REPET.refuse()\$ ? 1 : 0) + (\$MOC_WORDSFNUM.refuse()\$ ? 1 : 0) + (\$MOC_WORDSIM.refuse()\$ ? 1 : 0) + (\$MOC_WORDSIM.refuse()\$ ? 1 : 0) + (\$MOC_MEM3.refuse()\$ ? 1 : 0) + (\$MOC_MEM3.refuse()\$ ? 1 : 0) + (\$MOC_MEM3.refuse()\$ ? 1 : 0) + (\$MOC_ORIENT.refuse()\$ ? 1 : 0) == 0]</b> |

|                                                                                                                                                                                                                                                                                                                                                                                |                          |
|--------------------------------------------------------------------------------------------------------------------------------------------------------------------------------------------------------------------------------------------------------------------------------------------------------------------------------------------------------------------------------|--------------------------|
| <b>MOC_88</b>                                                                                                                                                                                                                                                                                                                                                                  | <b>MOC_BLINDMIS1_MSP</b> |
| <b>[CALCULATE IF MOC_SIGHT_MSP = YES]</b>                                                                                                                                                                                                                                                                                                                                      |                          |
| <b>CLINICIAN NOTES:</b> Not all components of the Montreal Cognitive Assessment (MoCA) Blind version may have been completed. This variable identifies the number of points out of the total score of 22 that the participant did not receive due to skipping tasks on the MoCA-BLIND which is administered to participants with severe visual impairment. Number of points: 1 |                          |
| <b>[CALCULATED VARIABLE, MOC_LETTER_MSP (REFUSED) + MOC_NUMFORW_MSP (REFUSED) + MOC_NUMBACK_MSP (REFUSED) + MOC_SUBS_MSP (REFUSED) + MOC_REPET_MSP (REFUSED) + MOC_WORDSFNUM_MSP (REFUSED), MOC_WORDSIM_MSP (REFUSED), MOC_MEM3_MSP (REFUSED), MOC_ORIENT_MSP (REFUSED)]</b>                                                                                                   |                          |

**VARIABLES MOC\_89 TO MOC\_98 SHOULD BE CALCULATED AS FOLLOWED:**

**VARIABLE NAME:** MOC\_TOTALMIS[NUMBER] SHOULD INCREASE SEQUENTIALLY FROM 2 TO 10 OR MORE.

**VARIABLE DESCRIPTION:** TOTAL NUMBER OF MISSING POINTS ON MONTREAL COGNITIVE ASSESSMENT (MOCA): [NUMBER] SHOULD INCREASE SEQUENTIALLY FROM 1 TO 10 OR MORE.

**VARIABLE CALCULATION:** THE TOTAL SCORE THAT THE VARIABLE CALCULATION EQUALS SHOULD INCREASE SEQUENTIALLY FROM 1 TO 10 OR MORE

|                                                                                                                                                                                                                                   |                          |
|-----------------------------------------------------------------------------------------------------------------------------------------------------------------------------------------------------------------------------------|--------------------------|
| <b>MOC_99</b>                                                                                                                                                                                                                     | <b>MOC_MISSCORE0_MSP</b> |
| The Memory Score Index (MIS) is scored out of a maximum of 15. A score of 8 and above is considered normal. The participant's score on the MIS is: 0                                                                              |                          |
| <b>[CALCULATED VARIABLE, SUM OF (MOC_MEM3_MSP = FACE, VELVET, CHURCH, DAISY, AND/OR RED * 3) + (MOC_MISCUE1_MSP = FACE, VELVET, CHURCH, DAISY, AND/OR RED * 2) + (MOC_MISCUE2_MSP = FACE, VELVET, CHURCH, DAISY, AND/OR RED)]</b> |                          |

**VARIABLES MOC\_100 TO MOC\_115 SHOULD BE CALCULATED AS FOLLOWED:**

**VARIABLE NAME:** MOC\_MISSCORE[NUMBER] SHOULD INCREASE SEQUENTIALLY FROM 1 TO 15.

**VARIABLE DESCRIPTION:** TOTAL SCORE MEMORY SCORE INDEX SHOULD INCREASE SEQUENTIALLY FROM 1 TO 15.

**VARIABLE CALCULATION:** THE TOTAL SCORE THAT THE VARIABLE CALCULATION EQUALS SHOULD INCREASE SEQUENTIALLY FROM 1 TO 15

|                                                                                                                                                                                                                          |                            |
|--------------------------------------------------------------------------------------------------------------------------------------------------------------------------------------------------------------------------|----------------------------|
| <b>MOC_116</b>                                                                                                                                                                                                           | <b>MOC_MISSCOREMIS_MSP</b> |
| <b>CLINICIAN NOTES:</b> Not all components of the Montreal Cognitive Assessment (MoCA) Memory Impairment Section (MIS) were completed. Please take this into consideration when interpreting the total score of the MIS. |                            |
| <b>[CALCULATED VARIABLE, MOC_MEM3_MSP (REFUSED) OR MOC_MISCUE1_MSP (REFUSED) OR MOC_MISCUE2_MSP (REFUSED)]</b>                                                                                                           |                            |

|                                                                                                                                                                                                                        |                      |
|------------------------------------------------------------------------------------------------------------------------------------------------------------------------------------------------------------------------|----------------------|
| <b>MOC_117</b>                                                                                                                                                                                                         | <b>MOC_NOTES_MSP</b> |
| <b>[ALWAYS ASK]</b>                                                                                                                                                                                                    |                      |
| Do you have any additional notes to include for this module? For example, were there any issues with the testing environment that should be taken into account when interpreting the results of the cognitive testing? |                      |
| YES                                                                                                                                                                                                                    | 1 Yes                |
| NO                                                                                                                                                                                                                     | 2 No                 |

|                                                                                         |                         |
|-----------------------------------------------------------------------------------------|-------------------------|
| <b>MOC_118</b>                                                                          | <b>MOC_NOTES_SP_MSP</b> |
| <b>[ASK IF MOC_NOTES_MSP = YES]</b>                                                     |                         |
| <b>CLINICIAN NOTE:</b> Please do not enter any identifying information in this section. |                         |
| Please provide any notes below:                                                         |                         |

**MOC\_END**



## Preliminary Diagnosis of Neurocognitive Disorder (NCD)

|                 |                                                                                                                                                                                                                                                                                          |
|-----------------|------------------------------------------------------------------------------------------------------------------------------------------------------------------------------------------------------------------------------------------------------------------------------------------|
| <b>Overview</b> | Please use this module to document your preliminary diagnosis of the participant's cognitive status based on the clinical assessment and informant interview. This module does not contain questions related to planning the care of individuals diagnosed with neurocognitive disorder. |
|-----------------|------------------------------------------------------------------------------------------------------------------------------------------------------------------------------------------------------------------------------------------------------------------------------------------|

|                                                                                                                                                                                                                                                                                                    |                    |                                                                                                                                                                                                                                         |
|----------------------------------------------------------------------------------------------------------------------------------------------------------------------------------------------------------------------------------------------------------------------------------------------------|--------------------|-----------------------------------------------------------------------------------------------------------------------------------------------------------------------------------------------------------------------------------------|
| <b>NCD_1</b>                                                                                                                                                                                                                                                                                       | <b>NCD_DIA_MSP</b> |                                                                                                                                                                                                                                         |
| <b>[ALWAYS ASK]</b>                                                                                                                                                                                                                                                                                |                    |                                                                                                                                                                                                                                         |
| Based on the clinical evaluation and informant interview, what is your diagnosis of the participant?                                                                                                                                                                                               |                    |                                                                                                                                                                                                                                         |
| <b>CLINICIAN NOTE:</b> The category of "no significant cognitive concerns" also includes participants without any cognitive complaints that performed poorly on the Montreal Cognitive Assessment (MoCA) if confounders such as language or education are thought to explain the poor performance. |                    |                                                                                                                                                                                                                                         |
| <b>CODE ONLY ONE RESPONSE</b>                                                                                                                                                                                                                                                                      |                    |                                                                                                                                                                                                                                         |
| NORMAL                                                                                                                                                                                                                                                                                             | 1                  | No significant cognitive concerns                                                                                                                                                                                                       |
| SUB                                                                                                                                                                                                                                                                                                | 2                  | Normal cognition but with subjective cognitive decline (self-reported confusion or memory problems happening more often and getting worse over last year but not meeting the criteria for either mild or major neurocognitive disorder) |
| DELIRIUM                                                                                                                                                                                                                                                                                           | 3                  | Delirium                                                                                                                                                                                                                                |
| MILD                                                                                                                                                                                                                                                                                               | 4                  | Mild neurocognitive disorder                                                                                                                                                                                                            |
| MAJOR                                                                                                                                                                                                                                                                                              | 5                  | Major neurocognitive disorder                                                                                                                                                                                                           |

|                                                                                                                                                                                         |                     |                                    |
|-----------------------------------------------------------------------------------------------------------------------------------------------------------------------------------------|---------------------|------------------------------------|
| <b>NCD_2</b>                                                                                                                                                                            | <b>NCD_CONF_MSP</b> |                                    |
| <b>[ALWAYS ASK]</b>                                                                                                                                                                     |                     |                                    |
| How confident are you in your diagnosis? Please rate on an 11-point scale (0-10; with the anchors of 0, indicating the lowest confidence rating, and 10, the highest confidence rating) |                     |                                    |
| NUMBER                                                                                                                                                                                  | Number              | _____ <b>[MASK: MIN=0, MAX=10]</b> |

|                                                                                   |                    |                                            |
|-----------------------------------------------------------------------------------|--------------------|--------------------------------------------|
| <b>NCD_3</b>                                                                      | <b>NCD_DOM_MSP</b> |                                            |
| <b>[ASK IF NCD_DIA_MSP = SUB, MILD ,OR MAJOR]</b>                                 |                    |                                            |
| What cognitive domains have been impacted by cognitive decline?                   |                    |                                            |
| <b>MULTIPLE RESPONSES ALLOWED (EXCEPT IF 96 IS SELECTED), CODE ALL THAT APPLY</b> |                    |                                            |
| AT                                                                                | 01                 | Attention                                  |
| EF                                                                                | 02                 | Executive function                         |
| LM                                                                                | 03                 | Learning and memory                        |
| LG_                                                                               | 04                 | Language                                   |
| PC                                                                                | 05                 | Perceptual/motor                           |
| SC                                                                                | 06                 | Social cognition                           |
| NONE                                                                              | 96                 | No cognitive domains appear to be impacted |

|                                                                                            |                     |                                                 |
|--------------------------------------------------------------------------------------------|---------------------|-------------------------------------------------|
| <b>NCD_4</b>                                                                               | <b>NCD_INFO_MSP</b> |                                                 |
| <b>[ALWAYS ASK]</b>                                                                        |                     |                                                 |
| What additional information or resources would increase your confidence in your diagnosis? |                     |                                                 |
| <b>MULTIPLE RESPONSES ALLOWED, CODE ALL THAT APPLY</b>                                     |                     |                                                 |
| NONE                                                                                       | 1                   | None                                            |
| LAB                                                                                        | 2                   | Laboratory investigations                       |
| IMG                                                                                        | 3                   | Neuroimaging                                    |
| REF                                                                                        | 4                   | Referral to a consultant                        |
| TIM                                                                                        | 5                   | Opportunity to follow the participant over time |
| OTSP                                                                                       | 7                   | Other (please specify: _____)                   |

|                                                                                                      |                     |                                                                     |
|------------------------------------------------------------------------------------------------------|---------------------|---------------------------------------------------------------------|
| <b>NCD_5</b>                                                                                         | <b>NCD_TYPE_MSP</b> |                                                                     |
| <b>[ASK IF NCD_DIA_MSP = MILD OR MAJOR]</b>                                                          |                     |                                                                     |
| Based on the clinical evaluation and informant interview, what is your diagnosis of the participant? |                     |                                                                     |
| <b>CODE ONLY ONE RESPONSE</b>                                                                        |                     |                                                                     |
| ALZ                                                                                                  | 1                   | Alzheimer's Disease                                                 |
| LWY                                                                                                  | 2                   | Lewy Body Disease                                                   |
| PKD                                                                                                  | 3                   | Parkinson's Disease                                                 |
| VSC                                                                                                  | 4                   | Vascular Cognitive Impairment                                       |
| FRT                                                                                                  | 5                   | Frontotemporal Degeneration                                         |
| TBI                                                                                                  | 6                   | Traumatic Brain Injury (Including Chronic Traumatic Encephalopathy) |
| MLT                                                                                                  | 7                   | Multiple (or Mixed) etiologies                                      |
| OTSP                                                                                                 | 8                   | Other (please specify: _____)                                       |
| UNK                                                                                                  | 9                   | Unknown                                                             |

|                                                                                                                                                                                                                                                              |                        |                                    |
|--------------------------------------------------------------------------------------------------------------------------------------------------------------------------------------------------------------------------------------------------------------|------------------------|------------------------------------|
| <b>NCD_6</b>                                                                                                                                                                                                                                                 | <b>NCD_TYPCONF_MSP</b> |                                    |
| <b>[ASK IF NCD_DIA_MSP = MILD OR MAJOR]</b>                                                                                                                                                                                                                  |                        |                                    |
| How confident are you in your diagnosis of the underlying cause of the mild or major neurocognitive disorder? Please rate on an 11-point scale (0-10; with the anchors of 0, indicating the lowest confidence rating, and 10, the highest confidence rating) |                        |                                    |
| NUMBER                                                                                                                                                                                                                                                       | Number                 | _____ <b>[MASK: MIN=0, MAX=10]</b> |

|                                                                                            |                       |                                                 |
|--------------------------------------------------------------------------------------------|-----------------------|-------------------------------------------------|
| <b>NCD_7</b>                                                                               | <b>NCD_TYPINF_MSP</b> |                                                 |
| <b>[ASK IF NCD_DIA_MSP = MILD OR MAJOR]</b>                                                |                       |                                                 |
| What additional information or resources would increase your confidence in your diagnosis? |                       |                                                 |
| <b>MULTIPLE RESPONSES ALLOWED, CODE ALL THAT APPLY</b>                                     |                       |                                                 |
| NONE                                                                                       | 1                     | None                                            |
| LAB                                                                                        | 2                     | Laboratory investigations                       |
| IMG                                                                                        | 3                     | Neuroimaging                                    |
| REF                                                                                        | 4                     | Referral to a consultant                        |
| TIM                                                                                        | 5                     | Opportunity to follow the participant over time |
| OTSP                                                                                       | 7                     | Other (please specify: _____)                   |

|                                                                                                                                                                                                                                       |                      |     |
|---------------------------------------------------------------------------------------------------------------------------------------------------------------------------------------------------------------------------------------|----------------------|-----|
| <b>NCD_8</b>                                                                                                                                                                                                                          | <b>NCD_NOTES_MSP</b> |     |
| <b>[ALWAYS ASK]</b>                                                                                                                                                                                                                   |                      |     |
| Do you have any additional notes? For example, are there any other details regarding your clinical assessment with the participant that you have not previously recorded that impacted the diagnosis you provided to the participant? |                      |     |
| YES                                                                                                                                                                                                                                   | 1                    | Yes |
| NO                                                                                                                                                                                                                                    | 2                    | No  |

|                                                                                         |                         |  |
|-----------------------------------------------------------------------------------------|-------------------------|--|
| <b>NCD_9</b>                                                                            | <b>NCD_NOTES_SP_MSP</b> |  |
| <b>[ASK IF NCD_NOTES_MSP = YES]</b>                                                     |                         |  |
| <b>CLINICIAN NOTE:</b> Please do not enter any identifying information in this section. |                         |  |
| Please provide any notes below:                                                         |                         |  |

|                                                                                                                                                                                                                                                                                                |                        |  |
|------------------------------------------------------------------------------------------------------------------------------------------------------------------------------------------------------------------------------------------------------------------------------------------------|------------------------|--|
| <b>NCD_10</b>                                                                                                                                                                                                                                                                                  | <b>NCD_LETTER1_MSP</b> |  |
| <b>ALWAYS ASK</b>                                                                                                                                                                                                                                                                              |                        |  |
| <b>DO NOT READ:</b> If your clinical assessment of the participant indicates that there may be a concern about the participant's memory, please fill out the CLSA Memory Study Participant Letter Template – Potential Cognitive Concerns template with the participant's name and MoCA score. |                        |  |
| If your clinical assessment of the participant indicates that there are not any concerns about the participant's memory, please fill out the CLSA Memory Study Participant Letter Template – No Cognitive Concerns template with the participant's name and MoCA score.                        |                        |  |
| Give the letter to the participant and verbally discuss the content.                                                                                                                                                                                                                           |                        |  |

|                                             |                        |     |
|---------------------------------------------|------------------------|-----|
| <b>NCD_11</b>                               | <b>NCD_LETTER2_MSP</b> |     |
| <b>ALWAYS ASK</b>                           |                        |     |
| Did you give the letter to the participant? |                        |     |
| YES                                         | 1                      | Yes |
| NO                                          | 2                      | No  |

|                                                           |                        |  |
|-----------------------------------------------------------|------------------------|--|
| <b>NCD_12</b>                                             | <b>NCD_LETTER3_MSP</b> |  |
| <b>[ASK IF NCD_LETTER_MSP = NO]</b>                       |                        |  |
| Why did you not give the letter to the participant? _____ |                        |  |
| <b>NCD_END</b>                                            |                        |  |
