# Supplementary material for: Protocol for validating an algorithm to identify neurocognitive disorders in Canadian Longitudinal Study on Aging participants: an observational study
Source: PubMed Central journal article supplement — BMJ Open. 2023 Nov 1;13(11):e073027. doi: 10.1136/bmjopen-2023-073027 (PMC10626860; doi:10.1136/bmjopen-2023-073027), 2023-11-01
Supplement: bmjopen-2023-073027supp008.pdf [file bmjopen-2023-073027supp008.pdf]

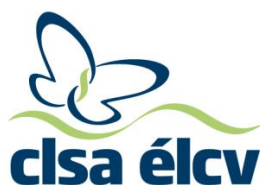

Canadian Longitudinal Study on Aging  
Étude longitudinale canadienne sur le vieillissement

**Parminder Raina, PhD**  
Lead Principal Investigator

Department of Health  
Research Methods, Evidence,  
and Impact  
Faculty of Health Sciences  
McMaster University

**Christina Wolfson, PhD**  
Co-Principal Investigator

Department of Epidemiology,  
Biostatistics & Occupational  
Health and Department of  
Medicine  
McGill University

**Susan Kirkland, PhD**  
Co-Principal Investigator

Department of Community  
Health & Epidemiology and  
Department of Medicine  
Dalhousie University

Supported by the Government  
of Canada through the  
Canadian Institutes of Health  
Research and the Canada  
Foundation for Innovation.

Appuyée par le gouvernement  
du Canada par l'entremise des  
Instituts de recherche en  
santé du Canada et de la  
Fondation canadienne pour  
l'innovation.

1-866-999-8303  
www.clsa-elcv.ca

## Supplementary Appendix 8 – Letter for participants without potential concerns about their cognition

Date

Dear [Participant name],

During your Data Collection Site visit for the Canadian Longitudinal Study on Aging (CLSA) Memory Study, our assessment did not identify any concerns about your memory. Please find below information that may be given to a physician to provide context for the examination result.

This person is a participant in the Canadian Longitudinal Study on Aging (CLSA) ([www.clsa/elcv.ca](http://www.clsa/elcv.ca)). The study is funded by the Canadian Institutes of Health Research (CIHR) and will involve 50,000 participants aged 45 to 85 years from across Canada who will be followed for up to 20 years.

The CLSA is conducting a substudy on the topic of memory funded by the Public Health Agency of Canada (PHAC). Participants in this study complete a clinical assessment done by a clinician specializing in geriatric psychiatry, neurology, or psychiatry with experience in cognitive assessment. The clinical assessment includes questions about the participant's medical history, a brief cognitive test, a neurocognitive examination, and observation of mobility. A family member or friend who knows the participant well answered questions regarding the participant's cognitive health, ability to complete daily tasks, and behaviour.

*The clinical assessment was completed for research purposes only and was not intended for clinical use.* One component of the clinical assessment was the administration of the Montreal Cognitive Assessment (MoCA) which is used to screen for potential cognitive problems. The participant score on the MoCA was \_\_\_\_\_. The interpretation of a MoCA score requires judgement by an experienced clinician who is aware of other aspects of the participant's health. A score itself does not indicate a specific diagnosis.

If you have any questions, please feel free to contact [Site Coordinator name or Site PI name as per DCS-specific protocol] at [phone number].

Sincerely,

[Clinician name]

CLSAMem\_NoConcernLetter\_v1.0\_2022Jan26

Page 1
