# Supplementary material for: Protocol for validating an algorithm to identify neurocognitive disorders in Canadian Longitudinal Study on Aging participants: an observational study
Source: PubMed Central journal article supplement — BMJ Open. 2023 Nov 1;13(11):e073027. doi: 10.1136/bmjopen-2023-073027 (PMC10626860; doi:10.1136/bmjopen-2023-073027), 2023-11-01
Supplement: bmjopen-2023-073027supp010.pdf [file bmjopen-2023-073027supp010.pdf]

**Supplementary Appendix 10 – Locally responsible research ethics boards**

- Université de Sherbrooke (Project ID 2009-18)
- Hamilton Integrated Research Ethics Board (Project ID 14406)
- Dalhousie University (Project ID 2010-2336)
- University of Manitoba (Project ID H2010:330), McGill University (Project ID A05-E59-10A)
- McGill University Health Centre Research Institute (Project ID: 2018-3497)
- Memorial University of Newfoundland (Project ID 11.003)
- University of Victoria (Project ID 11-320-C)
- Élisabeth Bruyère Research Institute of Ottawa (Project ID M16-10-023)
- University of British Columbia (Project ID H10-02143)
- Island Health (Formerly the Vancouver Island Health Authority, Project ID C2010-80)
- Simon Fraser University (Project ID 2010s0527)
- Calgary Conjoint Health Research Ethics Board (Project E-23489).
